# Supplementary material for: Student Performance Prediction Using Machine Learning Algorithms
Source: Hindawi journal article supplement (doi:10.1155/2024/4067721), 2024-01-01
Supplement: f1 [file 4067721.f1.pdf]

| id_student | gender | region      | entrance_r | num_of_p | studied_cr | disability | final_result |
|------------|--------|-------------|------------|----------|------------|------------|--------------|
| 11391      | M      | Addis Abab  | HE         | Qualific | 0          | 240 N      | Pass         |
| 28400      | F      | Afar Region | HE         | Qualific | 0          | 60 N       | Pass         |
| 30268      | F      | Amhara Re   | A Level or |          | 0          | 60 Y       | Withdrawn    |
| 31604      | F      | Oromia Re   | A Level or |          | 0          | 60 N       | Pass         |
| 32885      | F      | South Regi  | Lower Thar |          | 0          | 60 N       | Pass         |
| 38053      | M      | Tigrai Regi | A Level or |          | 0          | 60 N       | Pass         |
| 45462      | M      | Afar Region | HE         | Qualific | 0          | 60 N       | Pass         |
| 45642      | F      | Amhara Re   | A Level or |          | 0          | 120 N      | Pass         |
| 52130      | F      | Addis Abab  | A Level or |          | 0          | 90 N       | Pass         |
| 53025      | M      | North Regi  | Post Gradu |          | 0          | 60 N       | Pass         |
| 57506      | M      | South Regi  | Lower Thar |          | 0          | 60 N       | Pass         |
| 58873      | F      | Addis Abab  | A Level or |          | 0          | 60 N       | Pass         |
| 59185      | M      | Addis Abab  | Lower Thar |          | 0          | 60 N       | Pass         |
| 62155      | F      | Amhara Re   | HE         | Qualific | 0          | 60 N       | Pass         |
| 63400      | M      | Afar Region | Lower Thar |          | 0          | 60 N       | Pass         |
| 65002      | F      | Addis Abab  | A Level or |          | 0          | 60 N       | Withdrawn    |
| 70464      | F      | South Regi  | A Level or |          | 0          | 60 N       | Pass         |
| 71361      | M      | South Wes   | HE         | Qualific | 0          | 60 N       | Pass         |
| 74372      | M      | Addis Abab  | A Level or |          | 0          | 150 N      | Fail         |
| 75091      | M      | South Wes   | A Level or |          | 0          | 60 N       | Pass         |
| 77367      | M      | Somalia Re  | A Level or |          | 0          | 60 N       | Pass         |
| 91265      | M      | Amhara Re   | HE         | Qualific | 0          | 60 N       | Pass         |
| 94961      | M      | South Regi  | Lower Thar |          | 0          | 60 N       | Withdrawn    |
| 98094      | M      | Tigrai Regi | Lower Thar |          | 0          | 60 N       | Pass         |
| 100893     | M      | Sidamo Re   | A Level or |          | 0          | 60 N       | Pass         |
| 101781     | M      | South Regi  | Lower Thar |          | 0          | 60 N       | Pass         |
| 102806     | M      | Amhara Re   | A Level or |          | 0          | 60 N       | Pass         |
| 102952     | M      | Sidamo Re   | HE         | Qualific | 0          | 60 N       | Pass         |
| 104476     | M      | South Wes   | Post Gradu |          | 0          | 60 N       | Pass         |
| 106247     | M      | South Regi  | HE         | Qualific | 0          | 60 N       | Withdrawn    |
| 106577     | M      | Somalia Re  | Lower Thar |          | 0          | 60 N       | Pass         |
| 110175     | M      | Addis Abab  | HE         | Qualific | 0          | 60 N       | Pass         |
| 111717     | F      | Addis Abab  | HE         | Qualific | 0          | 60 N       | Pass         |
| 113295     | M      | Sidamo Re   | Lower Thar |          | 0          | 60 N       | Pass         |
| 114017     | F      | North Regi  | Post Gradu |          | 0          | 60 N       | Pass         |
| 114999     | M      | Sidamo Re   | HE         | Qualific | 0          | 60 N       | Pass         |
| 116541     | M      | Tigrai Regi | HE         | Qualific | 0          | 60 N       | Pass         |
| 116692     | M      | Addis Abab  | A Level or |          | 0          | 60 N       | Pass         |
| 118983     | M      | Somalia Re  | HE         | Qualific | 0          | 120 N      | Pass         |
| 123044     | M      | South Regi  | A Level or |          | 0          | 60 N       | Pass         |
| 127582     | F      | Somalia Re  | A Level or |          | 0          | 180 N      | Pass         |
| 129955     | M      | South Regi  | A Level or |          | 0          | 60 N       | Withdrawn    |
| 132976     | F      | Addis Abab  | Lower Thar |          | 0          | 120 N      | Pass         |
| 134143     | F      | Oromia Re   | A Level or |          | 0          | 60 N       | Distinction  |
| 135335     | F      | Addis Abab  | Lower Thar |          | 0          | 180 N      | Withdrawn    |
| 135400     | F      | Oromia Re   | Lower Thar |          | 0          | 60 Y       | Withdrawn    |

|        |   |                            |   |     |   |             |
|--------|---|----------------------------|---|-----|---|-------------|
| 137873 | M | South Wes A Level or I     | 0 | 60  | N | Pass        |
| 141355 | F | Somalia Re A Level or I    | 0 | 240 | N | Pass        |
| 141377 | M | South Wes A Level or I     | 0 | 345 | N | Withdrawn   |
| 142326 | F | North Regi A Level or I    | 0 | 60  | N | Pass        |
| 144801 | F | South Regi HE Qualific     | 0 | 60  | N | Pass        |
| 145130 | M | South Wes HE Qualific      | 0 | 120 | N | Pass        |
| 146188 | F | South Regi A Level or I    | 0 | 60  | Y | Fail        |
| 147756 | M | North Regi Lower Thar      | 0 | 120 | N | Fail        |
| 147793 | F | North Regi Lower Thar      | 0 | 90  | N | Withdrawn   |
| 148993 | F | Amhara Re A Level or I     | 0 | 60  | Y | Withdrawn   |
| 151358 | F | Sidamo Re, A Level or I    | 0 | 150 | N | Pass        |
| 155550 | M | Sidamo Re, A Level or I    | 0 | 420 | N | Pass        |
| 155854 | F | Somalia Re A Level or I    | 0 | 60  | N | Pass        |
| 155984 | F | Addis Abak Lower Thar      | 0 | 60  | N | Withdrawn   |
| 157568 | F | South Wes A Level or I     | 0 | 60  | N | Pass        |
| 159954 | M | Somalia Re A Level or I    | 0 | 60  | N | Withdrawn   |
| 164259 | M | Afar Regioi A Level or I   | 0 | 60  | N | Pass        |
| 167906 | F | Sidamo Re, A Level or I    | 0 | 60  | N | Pass        |
| 168936 | F | South Regi Lower Thar      | 0 | 60  | N | Pass        |
| 172112 | M | South Wes HE Qualific      | 0 | 60  | N | Pass        |
| 172797 | F | South Wes A Level or I     | 0 | 60  | N | Pass        |
| 174782 | M | Addis Abak HE Qualific     | 0 | 60  | N | Pass        |
| 175392 | M | North Regi HE Qualific     | 0 | 60  | N | Pass        |
| 175932 | M | Amhara Re HE Qualific      | 0 | 60  | N | Pass        |
| 175991 | F | Amhara Re A Level or I     | 0 | 180 | N | Fail        |
| 180753 | M | South Wes A Level or I     | 0 | 120 | N | Pass        |
| 181316 | F | South Wes A Level or I     | 0 | 120 | N | Withdrawn   |
| 183096 | F | South Wes A Level or I     | 0 | 60  | N | Pass        |
| 183947 | M | Sidamo Re, A Level or I    | 0 | 180 | N | Pass        |
| 184271 | M | South Wes HE Qualific      | 0 | 170 | N | Pass        |
| 185439 | M | Sidamo Re, HE Qualific     | 0 | 120 | N | Fail        |
| 186149 | M | Afar Regioi HE Qualific    | 0 | 60  | N | Pass        |
| 187100 | M | Oromia Re A Level or I     | 0 | 60  | N | Distinction |
| 188278 | M | Sidamo Re, A Level or I    | 0 | 120 | N | Withdrawn   |
| 189879 | M | Afar Regioi A Level or I   | 0 | 120 | N | Pass        |
| 192183 | F | South Wes Lower Thar       | 0 | 60  | N | Pass        |
| 195262 | M | Sidamo Re, A Level or I    | 0 | 60  | N | Withdrawn   |
| 200860 | M | Sidamo Re, Lower Thar      | 0 | 60  | N | Pass        |
| 202635 | F | Tigrai Regioi A Level or I | 0 | 60  | N | Withdrawn   |
| 205350 | M | South Wes HE Qualific      | 0 | 60  | N | Pass        |
| 205719 | M | Addis Abak A Level or I    | 0 | 90  | Y | Fail        |
| 227499 | F | Sidamo Re, A Level or I    | 0 | 60  | N | Distinction |
| 227517 | M | South Wes HE Qualific      | 0 | 180 | N | Fail        |
| 228082 | M | Sidamo Re, HE Qualific     | 0 | 60  | N | Pass        |
| 228222 | M | Somalia Re Lower Thar      | 0 | 60  | N | Pass        |
| 229179 | M | South Regi A Level or I    | 0 | 60  | N | Pass        |
| 229361 | M | Somalia Re A Level or I    | 0 | 60  | N | Pass        |

|        |   |                        |   |     |   |             |
|--------|---|------------------------|---|-----|---|-------------|
| 231554 | M | Sidamo Re A Level or   | 0 | 240 | N | Pass        |
| 235507 | M | Sidamo Re A Level or   | 0 | 240 | N | Withdrawn   |
| 236284 | M | Afar Region Post Gradu | 0 | 60  | N | Pass        |
| 238007 | M | South Regi HE Qualific | 0 | 60  | N | Pass        |
| 240712 | M | Sidamo Re HE Qualific  | 0 | 80  | N | Pass        |
| 240884 | M | South Regi A Level or  | 0 | 120 | N | Pass        |
| 241649 | M | Addis Abat HE Qualific | 0 | 60  | N | Pass        |
| 241729 | F | Somalia Re HE Qualific | 0 | 60  | N | Fail        |
| 242793 | M | Sidamo Re HE Qualific  | 0 | 60  | N | Pass        |
| 246834 | M | South Wes A Level or   | 0 | 60  | N | Pass        |
| 248270 | M | Amhara Re Lower Than   | 0 | 90  | N | Pass        |
| 255548 | M | Tigrai Regi Lower Than | 0 | 60  | N | Pass        |
| 256815 | M | Amhara Re HE Qualific  | 0 | 120 | N | Pass        |
| 258392 | F | South Regi Lower Than  | 0 | 60  | N | Pass        |
| 258894 | F | Addis Abat Lower Than  | 0 | 60  | N | Pass        |
| 260355 | F | Sidamo Re A Level or   | 0 | 60  | N | Withdrawn   |
| 262011 | M | Somalia Re A Level or  | 0 | 60  | N | Pass        |
| 262934 | F | Amhara Re A Level or   | 0 | 60  | N | Pass        |
| 268073 | M | Addis Abat A Level or  | 0 | 90  | N | Fail        |
| 268733 | M | Addis Abat A Level or  | 0 | 180 | N | Withdrawn   |
| 271251 | M | Afar Region A Level or | 0 | 60  | N | Pass        |
| 277880 | F | Oromia Re A Level or   | 0 | 60  | N | Withdrawn   |
| 279572 | M | Sidamo Re Lower Than   | 0 | 60  | N | Distinction |
| 281022 | F | Afar Region A Level or | 0 | 150 | N | Pass        |
| 281250 | M | Tigrai Regi Lower Than | 0 | 60  | N | Fail        |
| 281589 | M | Amhara Re HE Qualific  | 0 | 60  | N | Fail        |
| 282821 | M | South Wes A Level or   | 0 | 60  | N | Pass        |
| 286488 | M | Oromia Re A Level or   | 0 | 60  | N | Pass        |
| 287548 | M | Addis Abat A Level or  | 0 | 120 | N | Pass        |
| 290201 | M | Tigrai Regi A Level or | 0 | 60  | N | Pass        |
| 290757 | M | Amhara Re A Level or   | 0 | 60  | N | Pass        |
| 291334 | M | Oromia Re A Level or   | 0 | 60  | N | Distinction |
| 292923 | F | Oromia Re A Level or   | 0 | 180 | N | Withdrawn   |
| 293699 | M | Somalia Re A Level or  | 0 | 120 | N | Pass        |
| 294570 | M | Oromia Re HE Qualific  | 0 | 60  | N | Pass        |
| 294594 | M | Oromia Re A Level or   | 0 | 60  | N | Pass        |
| 295741 | M | Oromia Re A Level or   | 0 | 240 | N | Fail        |
| 296332 | M | South Regi Post Gradu  | 0 | 60  | N | Distinction |
| 298696 | F | Oromia Re HE Qualific  | 0 | 60  | N | Pass        |
| 300398 | M | South Regi A Level or  | 0 | 60  | N | Pass        |
| 302302 | F | Addis Abat A Level or  | 0 | 60  | N | Fail        |
| 305152 | M | Amhara Re A Level or   | 0 | 60  | N | Fail        |
| 305386 | M | South Regi A Level or  | 0 | 120 | Y | Pass        |
| 305539 | F | Tigrai Regi Lower Than | 0 | 120 | N | Withdrawn   |
| 306107 | M | South Regi A Level or  | 0 | 120 | N | Pass        |
| 306466 | M | Addis Abat A Level or  | 0 | 60  | N | Pass        |
| 306897 | F | Sidamo Re A Level or   | 0 | 60  | N | Pass        |

|        |   |                           |   |     |   |             |
|--------|---|---------------------------|---|-----|---|-------------|
| 307061 | F | Somalia Re HE Qualific    | 0 | 60  | N | Pass        |
| 307866 | M | South Regi A Level or I   | 0 | 60  | N | Pass        |
| 311917 | M | South Wes A Level or I    | 0 | 120 | N | Pass        |
| 312537 | M | South Regi Post Gradu     | 0 | 60  | N | Distinction |
| 312782 | M | South Regi A Level or I   | 0 | 60  | N | Pass        |
| 318933 | F | Addis Abak HE Qualific    | 0 | 120 | N | Pass        |
| 319047 | F | Somalia Re A Level or I   | 0 | 60  | N | Pass        |
| 321942 | M | South Regi HE Qualific    | 0 | 60  | N | Pass        |
| 324002 | M | Addis Abak HE Qualific    | 0 | 60  | N | Pass        |
| 324084 | F | South Wes A Level or I    | 0 | 60  | N | Pass        |
| 324282 | M | Oromia Re A Level or I    | 0 | 120 | N | Pass        |
| 331358 | F | South Regi HE Qualific    | 0 | 60  | N | Withdrawn   |
| 332789 | F | Addis Abak A Level or I   | 0 | 60  | N | Pass        |
| 333059 | M | Afar Regioi A Level or I  | 0 | 120 | N | Pass        |
| 333323 | M | Afar Regioi HE Qualific   | 0 | 60  | N | Pass        |
| 334259 | F | Sidamo Re, A Level or I   | 0 | 150 | N | Fail        |
| 334333 | F | South Wes A Level or I    | 0 | 240 | Y | Withdrawn   |
| 335764 | F | Oromia Re A Level or I    | 0 | 60  | N | Withdrawn   |
| 336207 | M | Addis Abak A Level or I   | 0 | 120 | N | Pass        |
| 339972 | M | North Regi A Level or I   | 0 | 60  | N | Pass        |
| 341872 | M | Addis Abak Lower Thar     | 0 | 180 | N | Fail        |
| 342007 | F | South Regi HE Qualific    | 0 | 60  | N | Withdrawn   |
| 342514 | M | Afar Regioi Lower Thar    | 0 | 60  | N | Pass        |
| 342972 | M | Sidamo Re, HE Qualific    | 0 | 60  | N | Pass        |
| 343446 | M | South Wes HE Qualific     | 0 | 120 | N | Pass        |
| 344282 | M | Sidamo Re, A Level or I   | 0 | 60  | N | Fail        |
| 345068 | M | Addis Abak A Level or I   | 0 | 180 | Y | Pass        |
| 345357 | M | Sidamo Re, A Level or I   | 0 | 60  | N | Distinction |
| 346025 | M | Addis Abak A Level or I   | 0 | 120 | N | Pass        |
| 346843 | F | Afar Regioi HE Qualific   | 0 | 120 | N | Fail        |
| 350188 | M | Amhara Re HE Qualific     | 0 | 60  | N | Pass        |
| 354858 | M | South Regi HE Qualific    | 0 | 120 | N | Withdrawn   |
| 357668 | M | Sidamo Re, A Level or I   | 0 | 60  | N | Fail        |
| 364177 | M | Addis Abak Lower Thar     | 0 | 60  | N | Fail        |
| 365244 | F | Sidamo Re, A Level or I   | 0 | 120 | N | Pass        |
| 365642 | M | Addis Abak Lower Thar     | 0 | 60  | N | Pass        |
| 366483 | M | South Wes HE Qualific     | 0 | 60  | N | Pass        |
| 368194 | F | South Wes A Level or I    | 0 | 120 | Y | Pass        |
| 368824 | M | Tigrai Regioi HE Qualific | 0 | 120 | N | Fail        |
| 368963 | M | Sidamo Re, Lower Thar     | 0 | 180 | N | Pass        |
| 376439 | M | North Regi HE Qualific    | 0 | 60  | N | Distinction |
| 376581 | F | South Regi A Level or I   | 0 | 60  | N | Pass        |
| 380953 | M | Somalia Re A Level or I   | 0 | 60  | N | Pass        |
| 383254 | M | Sidamo Re, A Level or I   | 0 | 120 | N | Pass        |
| 386924 | M | South Wes Lower Thar      | 0 | 120 | N | Pass        |
| 386952 | M | Sidamo Re, A Level or I   | 0 | 120 | N | Pass        |
| 388722 | F | Sidamo Re, Lower Thar     | 0 | 60  | N | Pass        |

|        |   |                           |   |     |   |             |
|--------|---|---------------------------|---|-----|---|-------------|
| 388885 | M | South Wes A Level or      | 0 | 60  | N | Pass        |
| 390890 | M | Afar Region A Level or    | 0 | 90  | N | Withdrawn   |
| 392756 | M | South Region A Level or   | 0 | 120 | N | Fail        |
| 392931 | F | Amhara Region A Level or  | 0 | 120 | N | Pass        |
| 393207 | M | Amhara Region A Level or  | 0 | 60  | N | Pass        |
| 396872 | M | Sidamo Region HE Qualific | 0 | 180 | N | Pass        |
| 398552 | M | Sidamo Region Lower Than  | 0 | 240 | N | Fail        |
| 401869 | F | Oromia Region Lower Than  | 0 | 60  | N | Pass        |
| 402470 | M | South Wes Lower Than      | 0 | 60  | N | Pass        |
| 404804 | M | Tigray Region Lower Than  | 0 | 120 | N | Pass        |
| 405088 | M | North Region A Level or   | 0 | 120 | N | Pass        |
| 405961 | M | Afar Region A Level or    | 0 | 240 | Y | Withdrawn   |
| 414117 | M | Sidamo Region A Level or  | 0 | 120 | N | Pass        |
| 415969 | M | South Region HE Qualific  | 0 | 90  | N | Withdrawn   |
| 420087 | M | Afar Region A Level or    | 0 | 60  | Y | Fail        |
| 429958 | F | Amhara Region A Level or  | 0 | 60  | N | Pass        |
| 441018 | F | Oromia Region A Level or  | 0 | 150 | N | Pass        |
| 441888 | M | Sidamo Region A Level or  | 0 | 120 | N | Pass        |
| 442442 | M | South Wes HE Qualific     | 0 | 120 | N | Withdrawn   |
| 444677 | M | Sidamo Region HE Qualific | 0 | 60  | N | Distinction |
| 470588 | M | Oromia Region HE Qualific | 0 | 60  | N | Withdrawn   |
| 489455 | F | South Wes A Level or      | 0 | 60  | N | Pass        |
| 494424 | F | North Region A Level or   | 0 | 60  | N | Fail        |
| 495284 | M | Oromia Region HE Qualific | 0 | 120 | N | Pass        |
| 498857 | M | Amhara Region HE Qualific | 0 | 60  | N | Pass        |
| 508818 | M | Sidamo Region A Level or  | 0 | 120 | N | Pass        |
| 512460 | M | Oromia Region HE Qualific | 0 | 120 | N | Pass        |
| 544103 | M | Amhara Region HE Qualific | 0 | 120 | N | Pass        |
| 550383 | M | Oromia Region HE Qualific | 0 | 60  | N | Pass        |
| 564450 | M | South Region HE Qualific  | 0 | 120 | N | Fail        |
| 568601 | F | Afar Region HE Qualific   | 0 | 60  | N | Withdrawn   |
| 572652 | M | South Region HE Qualific  | 0 | 120 | N | Pass        |
| 580389 | M | South Wes HE Qualific     | 0 | 120 | N | Pass        |
| 581129 | M | Addis Ababa A Level or    | 0 | 120 | N | Fail        |
| 588775 | M | South Wes A Level or      | 0 | 120 | N | Pass        |
| 591774 | M | South Region Post Gradu   | 0 | 60  | N | Pass        |
| 603861 | M | North Region HE Qualific  | 0 | 60  | N | Withdrawn   |
| 606143 | M | Afar Region Post Gradu    | 0 | 60  | N | Fail        |
| 704156 | M | South Region HE Qualific  | 0 | 120 | N | Pass        |
| 705379 | M | South Region A Level or   | 0 | 120 | N | Distinction |
| 721259 | F | South Region Lower Than   | 0 | 120 | N | Withdrawn   |
| 749412 | M | South Region Lower Than   | 0 | 60  | N | Pass        |
| 760729 | M | South Region A Level or   | 0 | 60  | N | Distinction |
| 905042 | F | Addis Ababa A Level or    | 0 | 60  | N | Pass        |
| 949618 | F | South Wes A Level or      | 0 | 60  | N | Pass        |
| 958987 | M | Amhara Region HE Qualific | 0 | 60  | N | Pass        |
| 968578 | F | Addis Ababa A Level or    | 0 | 60  | N | Pass        |

|         |   |                         |   |     |   |             |
|---------|---|-------------------------|---|-----|---|-------------|
| 969076  | M | South Wes A Level or I  | 0 | 180 | N | Withdrawn   |
| 971027  | F | South Regi HE Qualific  | 0 | 60  | N | Pass        |
| 978739  | M | South Regi HE Qualific  | 0 | 60  | N | Pass        |
| 1035023 | F | Sidamo Re Lower Than    | 0 | 60  | N | Pass        |
| 1105478 | M | Afar Regio HE Qualific  | 0 | 60  | N | Pass        |
| 1352868 | M | Sidamo Re A Level or I  | 0 | 60  | N | Withdrawn   |
| 1401935 | M | South Regi A Level or I | 0 | 60  | N | Fail        |
| 1402638 | F | Somalia Re HE Qualific  | 0 | 60  | N | Pass        |
| 1414443 | F | Sidamo Re A Level or I  | 0 | 120 | N | Fail        |
| 1456619 | M | South Wes A Level or I  | 0 | 60  | N | Withdrawn   |
| 1465690 | M | South Regi HE Qualific  | 0 | 120 | N | Pass        |
| 1472925 | F | Addis Abak Lower Than   | 0 | 60  | Y | Fail        |
| 1488959 | M | Sidamo Re A Level or I  | 0 | 60  | N | Pass        |
| 1518989 | F | Oromia Re Lower Than    | 0 | 60  | N | Pass        |
| 1618738 | M | Sidamo Re Lower Than    | 0 | 60  | N | Pass        |
| 1620151 | M | South Regi HE Qualific  | 0 | 60  | N | Fail        |
| 1626710 | M | Amhara Re A Level or I  | 0 | 60  | N | Distinction |
| 1640609 | M | South Regi A Level or I | 0 | 60  | N | Pass        |
| 1686521 | F | Amhara Re Lower Than    | 0 | 60  | N | Withdrawn   |
| 1729319 | F | Afar Regio HE Qualific  | 0 | 60  | N | Pass        |
| 1746134 | M | Addis Abak A Level or I | 0 | 60  | N | Pass        |
| 1758449 | M | South Regi Lower Than   | 0 | 75  | N | Withdrawn   |
| 1763015 | F | Afar Regio A Level or I | 0 | 60  | N | Withdrawn   |
| 1765788 | M | Oromia Re HE Qualific   | 0 | 60  | N | Pass        |
| 1801229 | M | South Wes HE Qualific   | 0 | 60  | N | Pass        |
| 1801641 | M | Afar Regio A Level or I | 0 | 60  | N | Pass        |
| 1847830 | M | South Wes Lower Than    | 0 | 60  | N | Pass        |
| 1860318 | M | South Wes Lower Than    | 0 | 300 | Y | Pass        |
| 1889511 | M | Sidamo Re A Level or I  | 0 | 60  | N | Pass        |
| 1889577 | F | South Regi A Level or I | 0 | 60  | Y | Pass        |
| 1894188 | F | Somalia Re A Level or I | 0 | 60  | N | Pass        |
| 1938355 | M | South Regi A Level or I | 0 | 60  | N | Pass        |
| 1942396 | F | Addis Abak Lower Than   | 0 | 120 | Y | Pass        |
| 1970390 | M | South Regi Lower Than   | 0 | 60  | N | Withdrawn   |
| 1976139 | M | South Wes Lower Than    | 0 | 120 | N | Pass        |
| 2011876 | F | Addis Abak A Level or I | 0 | 60  | Y | Pass        |
| 2012966 | M | Amhara Re Lower Than    | 0 | 60  | N | Pass        |
| 2051699 | F | South Wes Lower Than    | 0 | 60  | N | Pass        |
| 2062879 | F | Addis Abak A Level or I | 0 | 60  | N | Fail        |
| 2065691 | M | Sidamo Re A Level or I  | 0 | 330 | Y | Withdrawn   |
| 2073016 | F | Sidamo Re Lower Than    | 0 | 60  | N | Withdrawn   |
| 2080474 | F | South Regi A Level or I | 0 | 60  | N | Pass        |
| 2083877 | F | South Regi A Level or I | 0 | 120 | N | Pass        |
| 2084066 | F | South Wes Lower Than    | 0 | 60  | N | Fail        |
| 2104505 | M | South Regi Lower Than   | 0 | 60  | N | Pass        |
| 2122180 | F | Amhara Re Lower Than    | 0 | 60  | N | Distinction |
| 2139353 | M | Sidamo Re A Level or I  | 0 | 120 | N | Withdrawn   |

|         |   |                          |   |     |   |             |
|---------|---|--------------------------|---|-----|---|-------------|
| 2143752 | F | South Regi Lower Tha     | 0 | 60  | N | Pass        |
| 2146792 | M | Amhara Re HE Qualific    | 0 | 60  | N | Pass        |
| 2149225 | M | Afar Regio A Level or I  | 0 | 60  | Y | Withdrawn   |
| 2153153 | F | Sidamo Re A Level or I   | 0 | 60  | N | Pass        |
| 2155014 | F | South Regi Lower Tha     | 0 | 60  | Y | Pass        |
| 2164705 | F | Amhara Re A Level or I   | 0 | 120 | N | Fail        |
| 2171627 | F | Sidamo Re A Level or I   | 0 | 60  | N | Pass        |
| 2182846 | F | Sidamo Re A Level or I   | 0 | 60  | N | Pass        |
| 2194100 | F | Addis Abak A Level or I  | 0 | 60  | N | Pass        |
| 2197016 | F | Amhara Re HE Qualific    | 0 | 60  | N | Pass        |
| 2208424 | M | Afar Regio A Level or I  | 0 | 60  | N | Pass        |
| 2229865 | F | South Regi A Level or I  | 0 | 60  | N | Pass        |
| 2255601 | F | South Regi A Level or I  | 0 | 120 | N | Withdrawn   |
| 2268379 | F | Somalia Re A Level or I  | 0 | 60  | N | Pass        |
| 2278464 | M | South Regi Lower Tha     | 0 | 60  | N | Pass        |
| 2293923 | M | South Regi A Level or I  | 0 | 150 | N | Pass        |
| 2312620 | F | Somalia Re HE Qualific   | 0 | 60  | N | Withdrawn   |
| 2318055 | M | Tigrai Regi A Level or I | 0 | 60  | N | Withdrawn   |
| 2324976 | F | Afar Regio HE Qualific   | 0 | 60  | N | Withdrawn   |
| 2329342 | F | Addis Abak Lower Tha     | 0 | 120 | N | Pass        |
| 2339528 | F | Sidamo Re Lower Tha      | 0 | 60  | N | Distinction |
| 2342426 | M | Sidamo Re Lower Tha      | 0 | 60  | N | Fail        |
| 2344901 | F | Sidamo Re A Level or I   | 0 | 60  | N | Fail        |
| 2358056 | F | North Regi HE Qualific   | 0 | 60  | N | Fail        |
| 2358969 | F | Addis Abak A Level or I  | 0 | 180 | N | Withdrawn   |
| 2364471 | F | Afar Regio HE Qualific   | 0 | 60  | Y | Pass        |
| 2365101 | M | Oromia Re HE Qualific    | 0 | 300 | N | Withdrawn   |
| 2367155 | F | Addis Abak A Level or I  | 0 | 120 | N | Pass        |
| 2369266 | F | Sidamo Re Lower Tha      | 0 | 60  | N | Pass        |
| 2376496 | F | Somalia Re A Level or I  | 0 | 120 | N | Pass        |
| 2391984 | M | South Regi A Level or I  | 0 | 60  | N | Withdrawn   |
| 2411661 | F | South Regi A Level or I  | 0 | 120 | N | Fail        |
| 2411778 | M | Afar Regio HE Qualific   | 0 | 120 | N | Withdrawn   |
| 2412002 | M | South Wes Lower Tha      | 0 | 90  | N | Distinction |
| 2412967 | F | South Regi A Level or I  | 0 | 60  | N | Pass        |
| 2429854 | M | Sidamo Re A Level or I   | 0 | 120 | Y | Withdrawn   |
| 2437837 | F | North Regi A Level or I  | 0 | 60  | N | Pass        |
| 2449878 | F | Somalia Re A Level or I  | 0 | 60  | N | Pass        |
| 2456480 | M | Afar Regio Lower Tha     | 0 | 120 | N | Fail        |
| 2457256 | M | South Regi Lower Tha     | 0 | 180 | N | Pass        |
| 2458355 | M | Sidamo Re Lower Tha      | 0 | 60  | N | Pass        |
| 2460080 | M | Afar Regio HE Qualific   | 0 | 60  | N | Pass        |
| 2461190 | M | South Regi HE Qualific   | 0 | 60  | N | Fail        |
| 2469673 | F | Sidamo Re Lower Tha      | 0 | 60  | N | Fail        |
| 2470694 | F | Afar Regio HE Qualific   | 0 | 60  | N | Withdrawn   |
| 2479954 | M | Amhara Re A Level or I   | 0 | 60  | N | Pass        |
| 2481901 | M | Tigrai Regi Lower Tha    | 0 | 60  | N | Pass        |

|         |   |                          |   |     |   |             |
|---------|---|--------------------------|---|-----|---|-------------|
| 2482700 | M | South Regi Lower Tha     | 0 | 120 | N | Pass        |
| 2486127 | F | Addis Abak HE Qualific   | 0 | 120 | N | Pass        |
| 2498700 | F | Amhara Re Lower Tha      | 0 | 240 | N | Pass        |
| 2516503 | M | Oromia Re HE Qualific    | 0 | 60  | N | Pass        |
| 2518069 | M | Somalia Re A Level or I  | 0 | 60  | N | Pass        |
| 2521459 | F | Sidamo Re Lower Tha      | 0 | 60  | N | Pass        |
| 2523736 | M | Amhara Re A Level or I   | 0 | 120 | N | Pass        |
| 2529279 | F | Amhara Re HE Qualific    | 0 | 60  | N | Pass        |
| 2532302 | F | Addis Abak A Level or I  | 0 | 60  | N | Pass        |
| 2536991 | M | South Regi HE Qualific   | 0 | 60  | N | Distinction |
| 2542724 | F | South Regi Lower Tha     | 0 | 60  | N | Withdrawn   |
| 2550279 | F | North Regi HE Qualific   | 0 | 60  | N | Pass        |
| 2551220 | F | South Regi Lower Tha     | 0 | 60  | N | Pass        |
| 2552472 | F | South Regi HE Qualific   | 0 | 120 | N | Withdrawn   |
| 2555340 | F | South Regi HE Qualific   | 0 | 60  | N | Pass        |
| 2557283 | M | Sidamo Re HE Qualific    | 0 | 60  | N | Pass        |
| 2559575 | M | South Wes Lower Tha      | 0 | 60  | N | Pass        |
| 2562034 | M | Addis Abak A Level or I  | 0 | 60  | N | Pass        |
| 2566163 | F | South Regi A Level or I  | 0 | 60  | N | Pass        |
| 2566592 | F | South Regi A Level or I  | 0 | 60  | N | Pass        |
| 2569324 | M | South Regi A Level or I  | 0 | 120 | N | Withdrawn   |
| 2574528 | M | South Wes HE Qualific    | 0 | 60  | N | Pass        |
| 2574583 | M | Sidamo Re Lower Tha      | 0 | 60  | N | Pass        |
| 2576122 | M | Amhara Re A Level or I   | 0 | 60  | N | Withdrawn   |
| 2578995 | F | South Regi A Level or I  | 0 | 60  | Y | Pass        |
| 2586560 | F | Addis Abak Lower Tha     | 0 | 60  | N | Pass        |
| 2594139 | F | South Wes A Level or I   | 0 | 60  | N | Pass        |
| 2598871 | F | Addis Abak A Level or I  | 0 | 60  | N | Pass        |
| 2599352 | F | Afar Regioi A Level or I | 0 | 120 | N | Pass        |
| 2600688 | M | South Regi A Level or I  | 0 | 60  | N | Pass        |
| 2606098 | F | Somalia Re A Level or I  | 0 | 60  | N | Pass        |
| 2613116 | F | Sidamo Re Lower Tha      | 0 | 60  | N | Pass        |
| 2617002 | F | Sidamo Re A Level or I   | 0 | 60  | N | Pass        |
| 2620584 | M | South Regi A Level or I  | 0 | 60  | Y | Fail        |
| 2639449 | M | Somalia Re A Level or I  | 0 | 120 | N | Pass        |
| 2639540 | F | Amhara Re A Level or I   | 0 | 60  | N | Pass        |
| 2639641 | M | Oromia Re Lower Tha      | 0 | 120 | N | Pass        |
| 2641155 | M | Somalia Re Lower Tha     | 0 | 60  | N | Pass        |
| 2643002 | F | South Wes A Level or I   | 0 | 60  | N | Pass        |
| 2645733 | F | South Wes A Level or I   | 0 | 180 | N | Pass        |
| 2649826 | M | Addis Abak Lower Tha     | 0 | 60  | N | Distinction |
| 2650282 | M | Sidamo Re A Level or I   | 0 | 60  | N | Pass        |
| 2664024 | M | Oromia Re HE Qualific    | 0 | 60  | N | Pass        |
| 2666246 | M | Amhara Re A Level or I   | 0 | 60  | N | Pass        |
| 2669816 | M | Sidamo Re A Level or I   | 0 | 60  | N | Fail        |
| 2671132 | M | Sidamo Re HE Qualific    | 0 | 60  | N | Pass        |
| 2676809 | F | North Regi HE Qualific   | 0 | 150 | N | Fail        |



|         |   |                        |   |     |   |             |
|---------|---|------------------------|---|-----|---|-------------|
| 2678643 | F | South Regi A Level or  | 0 | 60  | N | Pass        |
| 2685865 | F | Somalia Re Lower Tha   | 0 | 60  | N | Pass        |
| 2688067 | M | Addis Abak A Level or  | 0 | 60  | N | Pass        |
| 2689958 | M | Addis Abak A Level or  | 0 | 60  | N | Distinction |
| 2691206 | F | South Regi A Level or  | 0 | 60  | N | Distinction |
| 2691244 | M | South Regi A Level or  | 0 | 180 | N | Pass        |
| 2694424 | M | Addis Abak A Level or  | 0 | 120 | N | Pass        |
| 2698257 | M | Somalia Re Lower Tha   | 0 | 120 | N | Pass        |
| 6516    | M | Afar Regio HE Qualific | 0 | 60  | N | Pass        |
| 24734   | F | South Regi Lower Tha   | 0 | 60  | N | Pass        |
| 26192   | F | Addis Abak A Level or  | 0 | 60  | N | Distinction |
| 28061   | M | Sidamo Re Lower Tha    | 0 | 60  | N | Pass        |
| 31600   | F | South Wes A Level or   | 0 | 60  | N | Pass        |
| 46844   | M | North Regi HE Qualific | 0 | 60  | N | Pass        |
| 52765   | F | Sidamo Re Lower Tha    | 0 | 120 | N | Pass        |
| 55104   | F | South Regi A Level or  | 0 | 60  | N | Pass        |
| 58071   | M | Addis Abak HE Qualific | 0 | 60  | N | Pass        |
| 58316   | F | Tigrai Regi A Level or | 0 | 120 | N | Pass        |
| 62487   | F | Somalia Re A Level or  | 0 | 60  | N | Pass        |
| 63165   | M | Oromia Re A Level or   | 0 | 60  | N | Pass        |
| 65002   | F | Addis Abak A Level or  | 1 | 60  | N | Fail        |
| 70011   | F | Afar Regio HE Qualific | 0 | 60  | N | Pass        |
| 75255   | M | Amhara Re A Level or   | 0 | 120 | N | Pass        |
| 79403   | M | South Regi Lower Tha   | 0 | 60  | N | Withdrawn   |
| 85092   | F | South Wes Lower Tha    | 0 | 60  | N | Pass        |
| 85144   | M | Afar Regio A Level or  | 0 | 60  | N | Pass        |
| 85302   | M | Sidamo Re Lower Tha    | 0 | 60  | N | Pass        |
| 87431   | M | Oromia Re Lower Tha    | 0 | 60  | N | Withdrawn   |
| 94961   | M | South Regi Lower Tha   | 1 | 60  | N | Pass        |
| 95755   | M | Oromia Re Lower Tha    | 0 | 60  | N | Withdrawn   |
| 101116  | F | Addis Abak Lower Tha   | 0 | 60  | N | Pass        |
| 107489  | F | Sidamo Re HE Qualific  | 0 | 60  | N | Pass        |
| 108872  | M | Sidamo Re HE Qualific  | 0 | 60  | N | Pass        |
| 109155  | F | South Regi HE Qualific | 0 | 60  | N | Pass        |
| 111512  | M | Tigrai Regi A Level or | 0 | 60  | N | Fail        |
| 117818  | F | Sidamo Re A Level or   | 0 | 60  | N | Pass        |
| 119902  | F | South Wes A Level or   | 0 | 60  | N | Withdrawn   |
| 121349  | F | South Wes A Level or   | 1 | 60  | N | Pass        |
| 124064  | F | Oromia Re A Level or   | 0 | 120 | N | Distinction |
| 125018  | M | South Regi HE Qualific | 0 | 60  | N | Pass        |
| 129955  | M | South Regi A Level or  | 1 | 60  | N | Withdrawn   |
| 130034  | F | Addis Abak A Level or  | 0 | 60  | N | Pass        |
| 130547  | F | South Regi A Level or  | 0 | 60  | N | Pass        |
| 130636  | M | Oromia Re A Level or   | 0 | 60  | N | Pass        |
| 131390  | M | Addis Abak A Level or  | 0 | 60  | N | Pass        |
| 133816  | F | South Regi A Level or  | 0 | 60  | N | Pass        |
| 133922  | M | North Regi Lower Tha   | 0 | 60  | N | Pass        |

|        |   |                          |   |     |   |             |
|--------|---|--------------------------|---|-----|---|-------------|
| 135335 | F | Addis Abat Lower Tha     | 1 | 120 | N | Withdrawn   |
| 135400 | F | Oromia Re Lower Tha      | 1 | 60  | Y | Pass        |
| 135471 | M | Addis Abat Lower Tha     | 0 | 60  | N | Distinction |
| 139033 | M | Oromia Re A Level or I   | 0 | 60  | N | Fail        |
| 141377 | M | South Wes A Level or I   | 1 | 210 | N | Pass        |
| 141506 | M | Afar Regio A Level or I  | 0 | 60  | N | Fail        |
| 146503 | M | Addis Abat Lower Tha     | 0 | 120 | Y | Pass        |
| 147756 | M | North Regi Lower Tha     | 1 | 120 | N | Pass        |
| 148993 | F | Amhara Re A Level or I   | 1 | 60  | Y | Pass        |
| 149741 | F | Afar Regio A Level or I  | 0 | 60  | N | Pass        |
| 149962 | M | South Regi A Level or I  | 0 | 60  | N | Pass        |
| 151587 | F | Tigrai Regi A Level or I | 0 | 120 | N | Withdrawn   |
| 152668 | F | South Regi Lower Tha     | 0 | 60  | N | Withdrawn   |
| 155984 | F | Addis Abat Lower Tha     | 1 | 120 | N | Pass        |
| 158707 | F | Oromia Re A Level or I   | 0 | 60  | N | Withdrawn   |
| 159954 | M | Somalia Re A Level or I  | 1 | 60  | N | Withdrawn   |
| 164944 | F | Addis Abat A Level or I  | 0 | 60  | Y | Pass        |
| 165226 | F | Tigrai Regi A Level or I | 0 | 60  | N | Fail        |
| 167961 | M | South Wes HE Qualific    | 0 | 60  | N | Pass        |
| 174024 | M | North Regi A Level or I  | 0 | 60  | N | Pass        |
| 174094 | F | Oromia Re Lower Tha      | 0 | 60  | Y | Pass        |
| 174745 | F | Somalia Re A Level or I  | 0 | 60  | N | Pass        |
| 175447 | M | Sidamo Re A Level or I   | 0 | 60  | N | Pass        |
| 175772 | F | Addis Abat HE Qualific   | 0 | 270 | N | Withdrawn   |
| 183057 | M | Tigrai Regi Lower Tha    | 0 | 60  | N | Pass        |
| 185350 | M | Sidamo Re Lower Tha      | 0 | 60  | N | Fail        |
| 188278 | M | Sidamo Re A Level or I   | 1 | 60  | N | Pass        |
| 199636 | M | Addis Abat A Level or I  | 0 | 60  | N | Pass        |
| 199897 | M | Somalia Re HE Qualific   | 0 | 60  | N | Pass        |
| 200804 | M | South Regi A Level or I  | 0 | 60  | N | Pass        |
| 205494 | M | South Wes HE Qualific    | 0 | 60  | N | Pass        |
| 228021 | M | Afar Regio A Level or I  | 0 | 60  | N | Distinction |
| 228383 | M | Sidamo Re HE Qualific    | 0 | 60  | N | Pass        |
| 232307 | M | South Regi Lower Tha     | 0 | 60  | N | Pass        |
| 235068 | F | Somalia Re Lower Tha     | 0 | 60  | N | Pass        |
| 235507 | M | Sidamo Re A Level or I   | 1 | 180 | N | Pass        |
| 236875 | M | South Regi A Level or I  | 0 | 60  | N | Pass        |
| 237274 | M | Sidamo Re A Level or I   | 0 | 60  | N | Pass        |
| 243510 | F | South Wes Lower Tha      | 0 | 60  | N | Fail        |
| 244246 | F | Oromia Re A Level or I   | 0 | 60  | N | Pass        |
| 248581 | F | South Regi A Level or I  | 0 | 60  | N | Distinction |
| 252073 | F | Sidamo Re A Level or I   | 0 | 120 | N | Pass        |
| 254625 | M | Tigrai Regi A Level or I | 0 | 60  | N | Distinction |
| 258587 | M | South Wes A Level or I   | 0 | 60  | N | Distinction |
| 260355 | F | Sidamo Re A Level or I   | 1 | 120 | N | Withdrawn   |
| 260623 | M | Oromia Re Lower Tha      | 0 | 60  | N | Pass        |
| 263251 | M | Addis Abat A Level or I  | 0 | 60  | N | Pass        |

|        |   |                        |   |     |   |             |
|--------|---|------------------------|---|-----|---|-------------|
| 263543 | M | Addis Abat Lower Than  | 0 | 60  | N | Pass        |
| 263952 | M | North Regi Lower Than  | 0 | 60  | N | Distinction |
| 266524 | F | South Regi A Level or  | 0 | 240 | N | Pass        |
| 268733 | M | Addis Abat A Level or  | 1 | 120 | N | Fail        |
| 273346 | M | Somalia Re Lower Than  | 0 | 60  | N | Pass        |
| 274947 | M | Addis Abat Lower Than  | 0 | 120 | N | Withdrawn   |
| 275674 | F | Sidamo Re A Level or   | 0 | 60  | N | Withdrawn   |
| 275792 | F | Addis Abat HE Qualific | 0 | 60  | N | Pass        |
| 277123 | F | Somalia Re A Level or  | 0 | 60  | N | Fail        |
| 277880 | F | Oromia Re A Level or   | 1 | 120 | N | Withdrawn   |
| 281077 | F | Addis Abat HE Qualific | 0 | 60  | N | Pass        |
| 281636 | F | South Regi A Level or  | 0 | 60  | N | Pass        |
| 285315 | M | Addis Abat HE Qualific | 0 | 60  | N | Pass        |
| 287040 | F | Addis Abat A Level or  | 0 | 90  | N | Pass        |
| 287204 | M | Afar Regio A Level or  | 0 | 60  | N | Pass        |
| 287210 | M | Afar Regio A Level or  | 0 | 60  | N | Pass        |
| 288994 | M | Afar Regio A Level or  | 0 | 120 | N | Fail        |
| 289449 | M | Somalia Re HE Qualific | 0 | 60  | N | Pass        |
| 290164 | F | Afar Regio HE Qualific | 0 | 60  | N | Pass        |
| 292525 | M | South Regi A Level or  | 0 | 60  | N | Pass        |
| 292775 | M | Oromia Re A Level or   | 0 | 60  | N | Pass        |
| 293824 | F | South Wes A Level or   | 0 | 60  | N | Pass        |
| 294496 | M | Amhara Re A Level or   | 0 | 60  | Y | Pass        |
| 294655 | M | Tigrai Regi A Level or | 0 | 60  | N | Fail        |
| 295060 | M | Addis Abat A Level or  | 0 | 60  | N | Fail        |
| 295075 | M | South Regi HE Qualific | 0 | 60  | N | Pass        |
| 296424 | M | Afar Regio A Level or  | 0 | 60  | N | Pass        |
| 298034 | M | Afar Regio A Level or  | 0 | 120 | N | Fail        |
| 298838 | F | Sidamo Re A Level or   | 0 | 60  | N | Pass        |
| 301967 | M | South Wes A Level or   | 0 | 60  | N | Pass        |
| 302476 | M | Oromia Re A Level or   | 0 | 60  | N | Distinction |
| 303521 | F | South Wes A Level or   | 0 | 60  | N | Pass        |
| 303985 | F | Afar Regio HE Qualific | 1 | 60  | N | Pass        |
| 304465 | F | South Regi A Level or  | 0 | 60  | N | Pass        |
| 306646 | M | South Regi A Level or  | 0 | 60  | N | Pass        |
| 309142 | F | South Regi A Level or  | 0 | 60  | N | Pass        |
| 310412 | F | Sidamo Re A Level or   | 0 | 60  | N | Pass        |
| 311235 | M | South Wes A Level or   | 0 | 60  | N | Pass        |
| 311659 | M | Addis Abat A Level or  | 0 | 120 | N | Fail        |
| 313937 | M | Afar Regio HE Qualific | 0 | 60  | N | Pass        |
| 315076 | M | Sidamo Re A Level or   | 0 | 60  | N | Pass        |
| 315744 | M | Afar Regio A Level or  | 0 | 60  | N | Distinction |
| 323370 | F | South Regi A Level or  | 0 | 120 | N | Pass        |
| 323805 | F | South Regi A Level or  | 0 | 180 | N | Withdrawn   |
| 328024 | M | Sidamo Re A Level or   | 0 | 60  | N | Pass        |
| 328734 | F | Addis Abat A Level or  | 0 | 180 | N | Withdrawn   |
| 329659 | F | Addis Abat A Level or  | 0 | 60  | Y | Fail        |

|        |   |                          |   |     |   |             |
|--------|---|--------------------------|---|-----|---|-------------|
| 330594 | M | South Wes Lower Thar     | 0 | 60  | N | Pass        |
| 331358 | F | South Regi HE Qualific   | 1 | 60  | N | Distinction |
| 332884 | M | Tigrai Regi A Level or I | 0 | 60  | N | Pass        |
| 334441 | M | Sidamo Re HE Qualific    | 0 | 60  | N | Fail        |
| 335247 | M | South Wes A Level or I   | 0 | 60  | N | Pass        |
| 335764 | F | Oromia Re A Level or I   | 1 | 60  | N | Pass        |
| 337748 | F | Sidamo Re A Level or I   | 0 | 120 | N | Withdrawn   |
| 338407 | M | Somalia Re A Level or I  | 0 | 60  | N | Pass        |
| 341876 | M | Addis Abak HE Qualific   | 0 | 120 | N | Withdrawn   |
| 342007 | F | South Regi HE Qualific   | 1 | 60  | N | Pass        |
| 345440 | M | South Regi HE Qualific   | 0 | 60  | N | Pass        |
| 345519 | F | North Regi A Level or I  | 0 | 60  | N | Pass        |
| 346118 | F | Addis Abak A Level or I  | 0 | 120 | N | Pass        |
| 348275 | M | Afar Regio HE Qualific   | 0 | 120 | N | Withdrawn   |
| 348807 | M | Somalia Re A Level or I  | 0 | 60  | N | Pass        |
| 350156 | M | South Wes A Level or I   | 0 | 120 | N | Pass        |
| 350939 | M | Addis Abak Lower Thar    | 0 | 60  | N | Pass        |
| 351336 | F | Somalia Re A Level or I  | 0 | 60  | N | Pass        |
| 353665 | M | South Regi A Level or I  | 0 | 60  | N | Pass        |
| 354170 | F | Tigrai Regi A Level or I | 0 | 60  | N | Fail        |
| 356170 | M | Amhara Re HE Qualific    | 0 | 60  | N | Pass        |
| 358182 | M | South Regi Lower Thar    | 0 | 120 | N | Pass        |
| 364957 | F | Addis Abak HE Qualific   | 0 | 60  | N | Pass        |
| 369834 | M | South Regi A Level or I  | 0 | 60  | N | Withdrawn   |
| 371710 | M | Afar Regio HE Qualific   | 0 | 60  | N | Pass        |
| 373872 | F | South Regi A Level or I  | 0 | 60  | N | Pass        |
| 375260 | M | South Wes HE Qualific    | 0 | 60  | N | Pass        |
| 375646 | M | Sidamo Re A Level or I   | 0 | 120 | N | Pass        |
| 377546 | M | Addis Abak A Level or I  | 0 | 120 | Y | Distinction |
| 381642 | F | Amhara Re A Level or I   | 0 | 60  | N | Withdrawn   |
| 382095 | M | South Regi Lower Thar    | 0 | 60  | N | Pass        |
| 383180 | F | South Regi A Level or I  | 0 | 60  | N | Withdrawn   |
| 383600 | M | Afar Regio A Level or I  | 0 | 60  | N | Pass        |
| 383723 | M | Addis Abak HE Qualific   | 0 | 60  | N | Pass        |
| 384203 | M | Afar Regio HE Qualific   | 0 | 120 | N | Pass        |
| 384725 | F | Addis Abak Lower Thar    | 0 | 60  | N | Pass        |
| 387533 | M | Afar Regio HE Qualific   | 0 | 60  | N | Fail        |
| 387954 | F | South Regi A Level or I  | 0 | 60  | N | Withdrawn   |
| 388147 | F | South Wes A Level or I   | 0 | 300 | N | Fail        |
| 390890 | M | Afar Regio A Level or I  | 1 | 90  | N | Pass        |
| 391249 | M | South Regi HE Qualific   | 0 | 60  | N | Distinction |
| 396599 | F | South Regi Lower Thar    | 0 | 120 | Y | Fail        |
| 396655 | F | South Regi Lower Thar    | 0 | 180 | Y | Fail        |
| 398171 | F | South Wes A Level or I   | 0 | 120 | N | Pass        |
| 398349 | F | Somalia Re HE Qualific   | 0 | 60  | N | Pass        |
| 400147 | M | Oromia Re Lower Thar     | 0 | 60  | N | Pass        |
| 400682 | F | Sidamo Re A Level or I   | 0 | 60  | N | Pass        |

|        |   |                          |   |     |   |             |
|--------|---|--------------------------|---|-----|---|-------------|
| 401404 | M | South Regi A Level or I  | 0 | 180 | N | Pass        |
| 402204 | M | South Regi A Level or I  | 0 | 60  | N | Pass        |
| 402727 | F | Addis Abak A Level or I  | 0 | 60  | Y | Pass        |
| 402961 | F | Amhara Re Lower Tha      | 0 | 60  | N | Pass        |
| 404356 | F | Oromia Re A Level or I   | 0 | 60  | N | Pass        |
| 406671 | M | South Wes A Level or I   | 0 | 60  | N | Pass        |
| 406682 | M | Oromia Re HE Qualific    | 0 | 60  | N | Distinction |
| 409100 | M | Oromia Re HE Qualific    | 0 | 60  | N | Pass        |
| 409703 | M | Addis Abak A Level or I  | 0 | 120 | N | Pass        |
| 410092 | F | Amhara Re A Level or I   | 0 | 60  | N | Pass        |
| 411971 | M | South Wes A Level or I   | 0 | 60  | N | Pass        |
| 415969 | M | South Regi HE Qualific   | 1 | 60  | N | Fail        |
| 418731 | M | South Wes A Level or I   | 0 | 90  | N | Fail        |
| 421455 | F | North Regi A Level or I  | 0 | 60  | N | Pass        |
| 424577 | M | Sidamo Re HE Qualific    | 0 | 120 | N | Pass        |
| 429858 | M | South Wes Lower Tha      | 0 | 300 | N | Distinction |
| 431025 | M | Addis Abak A Level or I  | 0 | 150 | N | Fail        |
| 439305 | M | Oromia Re A Level or I   | 0 | 60  | N | Pass        |
| 440319 | F | South Regi A Level or I  | 0 | 60  | N | Withdrawn   |
| 442064 | F | South Wes HE Qualific    | 0 | 120 | N | Pass        |
| 442132 | M | South Wes HE Qualific    | 0 | 60  | N | Pass        |
| 446108 | M | South Wes A Level or I   | 0 | 120 | N | Pass        |
| 447481 | M | South Wes A Level or I   | 0 | 60  | N | Pass        |
| 468120 | M | South Regi Lower Tha     | 0 | 120 | N | Fail        |
| 468694 | M | South Regi A Level or I  | 0 | 120 | N | Withdrawn   |
| 470588 | M | Oromia Re HE Qualific    | 1 | 60  | N | Withdrawn   |
| 470982 | F | Addis Abak HE Qualific   | 1 | 120 | N | Pass        |
| 476603 | M | Tigrai Regi A Level or I | 0 | 120 | N | Distinction |
| 481022 | M | Somalia Re A Level or I  | 0 | 180 | N | Fail        |
| 483800 | F | Sidamo Re A Level or I   | 0 | 120 | N | Pass        |
| 484897 | F | South Wes A Level or I   | 0 | 120 | N | Pass        |
| 485962 | F | Addis Abak HE Qualific   | 0 | 120 | N | Pass        |
| 488382 | F | Sidamo Re A Level or I   | 0 | 180 | N | Withdrawn   |
| 488990 | M | South Wes A Level or I   | 0 | 60  | N | Pass        |
| 500113 | M | Oromia Re A Level or I   | 0 | 120 | N | Pass        |
| 503889 | F | Sidamo Re A Level or I   | 0 | 60  | N | Pass        |
| 514526 | M | Sidamo Re Lower Tha      | 0 | 120 | Y | Withdrawn   |
| 518808 | F | Afar Regio HE Qualific   | 0 | 60  | N | Pass        |
| 522482 | F | Afar Regio HE Qualific   | 0 | 90  | N | Withdrawn   |
| 527100 | M | South Regi HE Qualific   | 0 | 120 | N | Distinction |
| 527801 | M | South Wes Lower Tha      | 0 | 120 | N | Fail        |
| 533068 | M | South Regi HE Qualific   | 0 | 60  | N | Pass        |
| 537081 | F | Afar Regio HE Qualific   | 0 | 120 | N | Fail        |
| 544253 | M | Sidamo Re A Level or I   | 0 | 120 | N | Pass        |
| 548120 | M | Sidamo Re HE Qualific    | 0 | 60  | N | Pass        |
| 561467 | F | South Regi A Level or I  | 0 | 90  | N | Withdrawn   |
| 567922 | F | Amhara Re A Level or I   | 0 | 120 | N | Withdrawn   |

|         |   |                          |   |     |   |             |
|---------|---|--------------------------|---|-----|---|-------------|
| 569505  | F | Somalia Re HE Qualific   | 0 | 60  | N | Distinction |
| 570317  | M | Tigrai Regi A Level or I | 0 | 120 | N | Pass        |
| 574505  | F | South Regi HE Qualific   | 0 | 120 | N | Pass        |
| 588477  | M | Sidamo Re HE Qualific    | 0 | 60  | N | Pass        |
| 593846  | M | South Regi HE Qualific   | 0 | 120 | N | Withdrawn   |
| 593987  | F | Addis Abak HE Qualific   | 0 | 180 | N | Fail        |
| 596288  | F | Afar Regi HE Qualific    | 0 | 120 | N | Pass        |
| 598070  | F | Sidamo Re A Level or I   | 0 | 60  | N | Withdrawn   |
| 603834  | F | Afar Regi HE Qualific    | 0 | 90  | N | Pass        |
| 603861  | M | North Regi HE Qualific   | 1 | 60  | N | Withdrawn   |
| 608440  | F | South Regi HE Qualific   | 0 | 120 | N | Withdrawn   |
| 623710  | F | Oromia Re A Level or I   | 0 | 120 | N | Withdrawn   |
| 623840  | M | Addis Abak A Level or I  | 0 | 120 | N | Pass        |
| 626240  | M | South Regi HE Qualific   | 0 | 120 | N | Pass        |
| 628088  | M | Oromia Re A Level or I   | 0 | 60  | Y | Withdrawn   |
| 628312  | F | Oromia Re HE Qualific    | 0 | 120 | N | Withdrawn   |
| 630142  | M | Addis Abak A Level or I  | 0 | 120 | N | Withdrawn   |
| 637665  | F | South Regi HE Qualific   | 0 | 60  | N | Pass        |
| 639053  | M | North Regi A Level or I  | 0 | 120 | N | Pass        |
| 642878  | M | South Wes HE Qualific    | 0 | 60  | N | Withdrawn   |
| 648130  | M | Sidamo Re A Level or I   | 0 | 240 | N | Withdrawn   |
| 676546  | M | Afar Regi HE Qualific    | 0 | 120 | N | Withdrawn   |
| 677186  | M | Oromia Re HE Qualific    | 0 | 60  | N | Pass        |
| 677281  | M | Tigrai Regi A Level or I | 0 | 60  | N | Fail        |
| 684180  | M | North Regi HE Qualific   | 0 | 120 | N | Pass        |
| 687698  | M | Sidamo Re HE Qualific    | 0 | 120 | N | Pass        |
| 696073  | F | South Wes Lower Thar     | 0 | 60  | N | Pass        |
| 696578  | M | South Regi HE Qualific   | 0 | 60  | N | Withdrawn   |
| 721259  | F | South Regi Lower Thar    | 1 | 60  | N | Withdrawn   |
| 852847  | M | South Wes A Level or I   | 0 | 60  | N | Fail        |
| 998493  | F | South Regi A Level or I  | 0 | 60  | N | Pass        |
| 1045203 | M | Tigrai Regi Lower Thar   | 0 | 60  | N | Pass        |
| 1112555 | F | South Regi A Level or I  | 0 | 60  | N | Pass        |
| 1183831 | M | South Wes HE Qualific    | 0 | 60  | N | Withdrawn   |
| 1268696 | M | South Wes HE Qualific    | 0 | 60  | N | Pass        |
| 1336190 | M | Sidamo Re HE Qualific    | 0 | 60  | N | Pass        |
| 1352868 | M | Sidamo Re A Level or I   | 1 | 60  | N | Pass        |
| 1398979 | F | South Regi A Level or I  | 0 | 60  | N | Withdrawn   |
| 1456619 | M | South Wes A Level or I   | 1 | 60  | N | Withdrawn   |
| 1469279 | F | Addis Abak HE Qualific   | 0 | 120 | N | Withdrawn   |
| 1471214 | M | Somalia Re A Level or I  | 0 | 60  | N | Pass        |
| 1472925 | F | Addis Abak Lower Thar    | 1 | 60  | Y | Pass        |
| 1484804 | F | South Regi A Level or I  | 0 | 60  | N | Pass        |
| 1511033 | M | Tigrai Regi A Level or I | 0 | 60  | N | Pass        |
| 1576513 | F | Somalia Re A Level or I  | 0 | 60  | N | Distinction |
| 1609002 | F | Somalia Re A Level or I  | 0 | 60  | N | Pass        |
| 1629771 | M | Oromia Re A Level or I   | 0 | 60  | N | Distinction |

|         |   |                          |   |     |   |             |
|---------|---|--------------------------|---|-----|---|-------------|
| 1676594 | M | Sidamo Re HE Qualific    | 0 | 60  | N | Withdrawn   |
| 1686551 | F | Afar Region A Level or I | 0 | 60  | N | Withdrawn   |
| 1689639 | F | Oromia Re Lower Than     | 0 | 60  | N | Withdrawn   |
| 1715896 | M | South Regi A Level or I  | 0 | 60  | N | Pass        |
| 1721270 | M | Oromia Re Lower Than     | 0 | 90  | N | Pass        |
| 1757766 | F | Amhara Re A Level or I   | 0 | 60  | N | Pass        |
| 1773377 | M | Sidamo Re A Level or I   | 0 | 60  | N | Pass        |
| 1799111 | M | Afar Region A Level or I | 0 | 60  | N | Pass        |
| 1818673 | F | Afar Region HE Qualific  | 0 | 120 | N | Fail        |
| 1839386 | F | Sidamo Re Lower Than     | 0 | 60  | N | Withdrawn   |
| 1926668 | M | Sidamo Re Lower Than     | 0 | 60  | N | Pass        |
| 1947156 | F | Oromia Re A Level or I   | 0 | 60  | N | Pass        |
| 1967783 | F | South Regi A Level or I  | 0 | 60  | Y | Pass        |
| 1970390 | M | South Regi Lower Than    | 1 | 120 | N | Pass        |
| 1975209 | M | Oromia Re Lower Than     | 0 | 60  | N | Pass        |
| 2010232 | F | Afar Region A Level or I | 0 | 60  | N | Pass        |
| 2045084 | M | Amhara Re HE Qualific    | 0 | 120 | N | Fail        |
| 2057803 | M | Sidamo Re Lower Than     | 0 | 60  | N | Pass        |
| 2073016 | F | Sidamo Re Lower Than     | 1 | 60  | N | Fail        |
| 2085209 | F | North Regi HE Qualific   | 0 | 60  | N | Pass        |
| 2086400 | M | Afar Region A Level or I | 0 | 60  | N | Pass        |
| 2139353 | M | Sidamo Re A Level or I   | 1 | 60  | N | Pass        |
| 2148681 | F | Somalia Re Lower Than    | 0 | 90  | N | Pass        |
| 2158048 | F | South Wes A Level or I   | 0 | 60  | N | Withdrawn   |
| 2158196 | F | South Wes Lower Than     | 0 | 120 | N | Withdrawn   |
| 2165164 | F | South Wes Lower Than     | 0 | 60  | N | Pass        |
| 2168833 | M | South Wes Lower Than     | 0 | 60  | N | Withdrawn   |
| 2207874 | F | South Regi Lower Than    | 0 | 120 | N | Fail        |
| 2240349 | M | South Wes Lower Than     | 0 | 60  | N | Pass        |
| 2244332 | M | Amhara Re A Level or I   | 0 | 60  | N | Distinction |
| 2273119 | F | South Regi A Level or I  | 0 | 60  | N | Withdrawn   |
| 2277857 | F | South Regi A Level or I  | 0 | 60  | N | Pass        |
| 2297896 | F | South Regi A Level or I  | 0 | 60  | N | Pass        |
| 2313257 | M | Sidamo Re A Level or I   | 0 | 360 | N | Withdrawn   |
| 2318055 | M | Tigrai Regi A Level or I | 1 | 60  | N | Pass        |
| 2330254 | M | Sidamo Re Lower Than     | 0 | 60  | N | Pass        |
| 2355470 | M | Somalia Re A Level or I  | 0 | 120 | N | Pass        |
| 2358969 | F | Addis Abat A Level or I  | 1 | 60  | N | Pass        |
| 2363863 | F | Amhara Re A Level or I   | 0 | 60  | N | Distinction |
| 2365101 | M | Oromia Re HE Qualific    | 1 | 240 | N | Withdrawn   |
| 2369415 | M | Sidamo Re A Level or I   | 0 | 60  | N | Pass        |
| 2375975 | F | Addis Abat A Level or I  | 0 | 60  | Y | Pass        |
| 2397661 | F | Somalia Re Lower Than    | 0 | 60  | N | Pass        |
| 2398313 | M | Addis Abat Lower Than    | 0 | 60  | N | Pass        |
| 2404408 | F | South Wes Lower Than     | 0 | 60  | N | Fail        |
| 2425993 | M | Afar Region HE Qualific  | 0 | 60  | N | Pass        |
| 2429854 | M | Sidamo Re A Level or I   | 1 | 60  | Y | Fail        |

|         |   |                         |   |     |   |             |
|---------|---|-------------------------|---|-----|---|-------------|
| 2432796 | F | Addis Abat HE Qualific  | 0 | 60  | N | Pass        |
| 2434159 | M | Amhara Re A Level or I  | 0 | 60  | N | Pass        |
| 2436812 | F | South Regi A Level or I | 0 | 60  | N | Fail        |
| 2467267 | M | South Regi HE Qualific  | 0 | 60  | N | Pass        |
| 2470694 | F | Afar Regio HE Qualific  | 1 | 60  | N | Fail        |
| 2473538 | F | Oromia Re A Level or I  | 0 | 60  | N | Pass        |
| 2474849 | F | Afar Regio A Level or I | 1 | 60  | N | Withdrawn   |
| 2494700 | M | Sidamo Re HE Qualific   | 0 | 60  | N | Pass        |
| 2500258 | F | Amhara Re A Level or I  | 0 | 120 | N | Pass        |
| 2507842 | F | Amhara Re A Level or I  | 0 | 60  | N | Withdrawn   |
| 2509639 | M | South Regi A Level or I | 0 | 90  | N | Pass        |
| 2514368 | M | South Regi A Level or I | 0 | 60  | N | Distinction |
| 2514898 | F | Addis Abat Lower Thar   | 0 | 60  | N | Pass        |
| 2521865 | F | South Regi A Level or I | 0 | 60  | Y | Pass        |
| 2522927 | F | South Wes A Level or I  | 0 | 60  | N | Pass        |
| 2540168 | F | Somalia Re HE Qualific  | 0 | 60  | N | Withdrawn   |
| 2546445 | M | Afar Regio HE Qualific  | 0 | 60  | N | Withdrawn   |
| 2551797 | F | Oromia Re A Level or I  | 0 | 60  | N | Pass        |
| 2551932 | M | Oromia Re Lower Thar    | 0 | 60  | N | Withdrawn   |
| 2569324 | M | South Regi A Level or I | 1 | 60  | N | Pass        |
| 2574990 | F | South Wes HE Qualific   | 0 | 60  | N | Fail        |
| 2576122 | M | Amhara Re A Level or I  | 1 | 60  | N | Fail        |
| 2578676 | M | North Regi Lower Thar   | 0 | 120 | N | Pass        |
| 2581477 | F | Addis Abat Lower Thar   | 0 | 60  | N | Pass        |
| 2584873 | F | Addis Abat A Level or I | 0 | 120 | N | Pass        |
| 2595841 | F | Somalia Re Lower Thar   | 0 | 60  | N | Fail        |
| 2596621 | M | South Wes A Level or I  | 0 | 60  | N | Pass        |
| 2601889 | M | South Regi HE Qualific  | 0 | 60  | N | Pass        |
| 2602338 | F | Amhara Re Lower Thar    | 0 | 120 | N | Fail        |
| 2606802 | M | North Regi A Level or I | 0 | 60  | N | Fail        |
| 2624961 | F | Sidamo Re A Level or I  | 0 | 60  | N | Fail        |
| 2630087 | F | Somalia Re Lower Thar   | 0 | 210 | N | Withdrawn   |
| 2633226 | M | South Wes A Level or I  | 0 | 60  | N | Pass        |
| 2642616 | F | Sidamo Re A Level or I  | 0 | 90  | N | Pass        |
| 2642935 | F | Somalia Re Lower Thar   | 0 | 60  | N | Distinction |
| 2648611 | F | Oromia Re A Level or I  | 0 | 60  | N | Pass        |
| 2649800 | M | South Regi Lower Thar   | 0 | 60  | N | Pass        |
| 2654628 | F | Addis Abat Lower Thar   | 1 | 60  | N | Pass        |
| 2677624 | M | Amhara Re A Level or I  | 0 | 90  | N | Pass        |
| 2680312 | M | Afar Regio HE Qualific  | 0 | 60  | N | Pass        |
| 2688166 | M | Sidamo Re Lower Thar    | 0 | 60  | N | Pass        |
| 2690062 | F | Amhara Re A Level or I  | 0 | 120 | N | Withdrawn   |
| 2692514 | M | Amhara Re Lower Thar    | 0 | 120 | N | Pass        |
| 2694788 | F | South Regi A Level or I | 0 | 180 | Y | Fail        |
| 23629   | F | Addis Abat Lower Thar   | 2 | 60  | N | Fail        |
| 25107   | F | Addis Abat Lower Thar   | 0 | 120 | N | Pass        |
| 27891   | M | Afar Regio Lower Thar   | 2 | 120 | Y | Withdrawn   |



|        |   |                          |   |     |   |             |
|--------|---|--------------------------|---|-----|---|-------------|
| 29144  | M | South Regi Lower Tha     | 0 | 120 | N | Fail        |
| 31663  | M | North Regi A Level or I  | 0 | 60  | N | Pass        |
| 33666  | F | Sidamo Re A Level or I   | 1 | 60  | N | Withdrawn   |
| 34229  | F | South Wes A Level or I   | 2 | 120 | N | Pass        |
| 34353  | M | Afar Regio A Level or I  | 0 | 120 | Y | Fail        |
| 34431  | F | Sidamo Re Lower Tha      | 0 | 60  | N | Withdrawn   |
| 34694  | M | South Regi A Level or I  | 1 | 60  | N | Withdrawn   |
| 34756  | F | Somalia Re Lower Tha     | 1 | 150 | N | Withdrawn   |
| 34863  | F | Sidamo Re A Level or I   | 0 | 60  | N | Pass        |
| 35812  | F | Addis Abak Lower Tha     | 0 | 60  | N | Fail        |
| 39655  | F | Afar Regio Lower Tha     | 0 | 120 | N | Distinction |
| 50993  | F | Afar Regio Lower Tha     | 0 | 60  | Y | Fail        |
| 52899  | F | Somalia Re Lower Tha     | 0 | 60  | N | Withdrawn   |
| 58089  | F | South Regi A Level or I  | 2 | 90  | N | Fail        |
| 62631  | F | Amhara Re A Level or I   | 0 | 60  | N | Fail        |
| 70608  | F | Oromia Re HE Qualific    | 0 | 240 | N | Distinction |
| 71433  | F | Amhara Re A Level or I   | 1 | 150 | N | Fail        |
| 72070  | M | Oromia Re A Level or I   | 0 | 60  | N | Withdrawn   |
| 74695  | F | North Regi Lower Tha     | 0 | 90  | N | Distinction |
| 74734  | F | Amhara Re Lower Tha      | 0 | 180 | N | Pass        |
| 75399  | F | Addis Abak Lower Tha     | 0 | 60  | N | Pass        |
| 78645  | F | Addis Abak Lower Tha     | 0 | 60  | N | Fail        |
| 79378  | F | Sidamo Re Lower Tha      | 4 | 120 | Y | Fail        |
| 82535  | F | Tigrai Regi Lower Tha    | 0 | 180 | N | Pass        |
| 82741  | F | Addis Abak Lower Tha     | 0 | 60  | N | Pass        |
| 83254  | F | Sidamo Re HE Qualific    | 0 | 60  | N | Pass        |
| 84245  | M | Tigrai Regi A Level or I | 0 | 120 | N | Distinction |
| 84664  | F | Amhara Re A Level or I   | 0 | 60  | N | Pass        |
| 86291  | F | Tigrai Regi HE Qualific  | 0 | 60  | N | Withdrawn   |
| 87604  | F | South Regi A Level or I  | 0 | 180 | N | Withdrawn   |
| 87732  | M | Somalia Re A Level or I  | 0 | 75  | N | Pass        |
| 88580  | F | Sidamo Re Lower Tha      | 0 | 60  | N | Withdrawn   |
| 91322  | F | Sidamo Re A Level or I   | 0 | 60  | N | Pass        |
| 92274  | F | Addis Abak Lower Tha     | 0 | 60  | N | Withdrawn   |
| 92832  | F | Addis Abak A Level or I  | 0 | 60  | N | Pass        |
| 92947  | F | Tigrai Regi HE Qualific  | 0 | 120 | N | Distinction |
| 92993  | F | Addis Abak Lower Tha     | 3 | 135 | N | Pass        |
| 94616  | F | South Regi Lower Tha     | 1 | 60  | N | Fail        |
| 96291  | F | South Regi Lower Tha     | 0 | 60  | N | Withdrawn   |
| 97154  | F | North Regi A Level or I  | 0 | 60  | N | Pass        |
| 98313  | F | Afar Regio HE Qualific   | 0 | 60  | N | Pass        |
| 102849 | F | Addis Abak A Level or I  | 0 | 180 | N | Withdrawn   |
| 104054 | F | Oromia Re Lower Tha      | 0 | 120 | N | Distinction |
| 108377 | F | South Regi Lower Tha     | 0 | 120 | Y | Pass        |
| 108589 | F | South Wes A Level or I   | 0 | 60  | N | Pass        |
| 109938 | F | Tigrai Regi HE Qualific  | 0 | 120 | N | Distinction |
| 110881 | F | Addis Abak A Level or I  | 0 | 60  | N | Pass        |

|        |   |                             |   |     |   |             |
|--------|---|-----------------------------|---|-----|---|-------------|
| 116603 | F | Afar Region HE Qualific     | 0 | 60  | N | Distinction |
| 117071 | M | Sidamo Region A Level or l  | 0 | 60  | N | Fail        |
| 120994 | F | Sidamo Region Lower Than    | 0 | 70  | Y | Fail        |
| 122524 | F | Tigray Region Lower Than    | 2 | 120 | N | Fail        |
| 123379 | F | Somalia Region A Level or l | 1 | 180 | N | Withdrawn   |
| 123860 | F | Addis Ababa A Level or l    | 0 | 60  | Y | Pass        |
| 126322 | F | Afar Region A Level or l    | 1 | 60  | N | Pass        |
| 126411 | F | South Region Lower Than     | 2 | 60  | Y | Fail        |
| 127209 | F | Afar Region A Level or l    | 1 | 180 | Y | Withdrawn   |
| 128776 | F | Sidamo Region Lower Than    | 1 | 120 | N | Withdrawn   |
| 133155 | F | Sidamo Region HE Qualific   | 0 | 60  | N | Pass        |
| 133531 | F | Tigray Region Lower Than    | 0 | 60  | N | Fail        |
| 133748 | F | Afar Region Lower Than      | 0 | 70  | N | Fail        |
| 141823 | F | Somalia Region A Level or l | 0 | 120 | N | Withdrawn   |
| 142324 | F | Addis Ababa Lower Than      | 0 | 60  | N | Fail        |
| 143741 | F | Sidamo Region A Level or l  | 0 | 120 | Y | Distinction |
| 143854 | F | South Region Lower Than     | 0 | 60  | N | Withdrawn   |
| 145544 | M | Somalia Region A Level or l | 0 | 60  | N | Pass        |
| 147876 | M | South West A Level or l     | 0 | 60  | N | Fail        |
| 151697 | F | Somalia Region A Level or l | 0 | 60  | Y | Pass        |
| 152153 | F | Addis Ababa Lower Than      | 1 | 60  | N | Withdrawn   |
| 152910 | M | South Region A Level or l   | 0 | 60  | N | Pass        |
| 152929 | F | Amhara Region Lower Than    | 0 | 60  | N | Pass        |
| 153212 | F | South West Lower Than       | 1 | 120 | N | Distinction |
| 153704 | F | South Region Lower Than     | 1 | 120 | N | Withdrawn   |
| 154027 | F | Oromia Region Lower Than    | 0 | 60  | N | Pass        |
| 154125 | F | Sidamo Region A Level or l  | 0 | 60  | N | Fail        |
| 154540 | F | Amhara Region HE Qualific   | 0 | 60  | N | Pass        |
| 155735 | F | South Region Lower Than     | 1 | 60  | N | Withdrawn   |
| 156835 | F | Sidamo Region A Level or l  | 0 | 60  | N | Pass        |
| 161678 | F | Amhara Region Lower Than    | 1 | 60  | N | Fail        |
| 165243 | M | Tigray Region A Level or l  | 0 | 60  | N | Pass        |
| 169515 | F | Addis Ababa A Level or l    | 0 | 60  | N | Withdrawn   |
| 170356 | F | Addis Ababa Lower Than      | 0 | 120 | N | Withdrawn   |
| 171377 | F | South Region Lower Than     | 2 | 120 | N | Fail        |
| 173316 | F | Sidamo Region A Level or l  | 0 | 60  | N | Fail        |
| 173335 | F | Amhara Region Lower Than    | 1 | 60  | N | Fail        |
| 174321 | F | South West A Level or l     | 1 | 270 | N | Withdrawn   |
| 177639 | F | Tigray Region Lower Than    | 1 | 150 | N | Withdrawn   |
| 179605 | F | South West A Level or l     | 0 | 60  | N | Withdrawn   |
| 182824 | F | Addis Ababa Lower Than      | 2 | 120 | N | Pass        |
| 183806 | F | South West A Level or l     | 1 | 225 | Y | Fail        |
| 185240 | F | South Region Lower Than     | 1 | 120 | N | Withdrawn   |
| 185349 | F | Afar Region Lower Than      | 2 | 60  | N | Pass        |
| 186670 | F | Sidamo Region HE Qualific   | 1 | 60  | N | Fail        |
| 186780 | F | Amhara Region A Level or l  | 2 | 120 | Y | Withdrawn   |
| 186988 | F | Sidamo Region Lower Than    | 2 | 60  | N | Fail        |

|        |   |                           |   |     |   |             |
|--------|---|---------------------------|---|-----|---|-------------|
| 187793 | F | Amhara Re Lower Tha       | 1 | 120 | Y | Fail        |
| 188152 | M | Oromia Re Lower Tha       | 0 | 120 | N | Distinction |
| 192424 | M | Tigrai Regio A Level or I | 0 | 120 | N | Pass        |
| 193822 | F | Tigrai Regio Lower Tha    | 0 | 60  | Y | Pass        |
| 197595 | F | Sidamo Re HE Qualific     | 0 | 60  | N | Pass        |
| 198956 | M | Sidamo Re Lower Tha       | 0 | 60  | N | Pass        |
| 199520 | F | Afar Regio HE Qualific    | 0 | 60  | N | Pass        |
| 200863 | F | South Wes A Level or I    | 1 | 60  | N | Withdrawn   |
| 200905 | F | Sidamo Re HE Qualific     | 1 | 60  | N | Fail        |
| 203108 | F | South Wes A Level or I    | 1 | 120 | N | Fail        |
| 203481 | F | South Regi Lower Tha      | 0 | 60  | N | Pass        |
| 203652 | F | Addis Abak A Level or I   | 0 | 180 | Y | Fail        |
| 204746 | F | Sidamo Re A Level or I    | 0 | 120 | N | Distinction |
| 205231 | F | Afar Regio Lower Tha      | 1 | 60  | N | Fail        |
| 226374 | M | Tigrai Regio A Level or I | 0 | 60  | N | Fail        |
| 226827 | F | Oromia Re A Level or I    | 0 | 60  | N | Pass        |
| 228049 | F | South Regi Lower Tha      | 0 | 60  | N | Withdrawn   |
| 228235 | F | Sidamo Re A Level or I    | 1 | 120 | N | Withdrawn   |
| 229240 | F | Addis Abak A Level or I   | 0 | 60  | N | Distinction |
| 229426 | F | South Regi Lower Tha      | 0 | 60  | N | Distinction |
| 230348 | F | Addis Abak A Level or I   | 2 | 585 | N | Withdrawn   |
| 232600 | F | Amhara Re Lower Tha       | 2 | 60  | N | Withdrawn   |
| 232695 | F | Tigrai Regio Lower Tha    | 0 | 60  | N | Pass        |
| 232745 | F | South Regi Lower Tha      | 0 | 180 | Y | Withdrawn   |
| 235097 | F | Amhara Re Lower Tha       | 1 | 60  | Y | Fail        |
| 237304 | M | North Regi A Level or I   | 0 | 60  | N | Fail        |
| 237913 | F | Amhara Re A Level or I    | 1 | 60  | N | Fail        |
| 242149 | F | Amhara Re Lower Tha       | 0 | 180 | N | Withdrawn   |
| 245404 | F | Amhara Re Lower Tha       | 1 | 60  | N | Fail        |
| 247267 | M | Oromia Re Lower Tha       | 0 | 60  | N | Fail        |
| 248103 | F | Sidamo Re A Level or I    | 0 | 60  | N | Pass        |
| 249534 | F | Somalia Re A Level or I   | 0 | 60  | N | Pass        |
| 251351 | F | Afar Regio Lower Tha      | 0 | 60  | N | Pass        |
| 252340 | F | Afar Regio A Level or I   | 2 | 120 | Y | Fail        |
| 252652 | F | Sidamo Re A Level or I    | 0 | 120 | N | Withdrawn   |
| 253250 | F | North Regi A Level or I   | 1 | 60  | N | Withdrawn   |
| 255347 | F | South Regi Lower Tha      | 0 | 60  | N | Pass        |
| 255998 | F | Sidamo Re Lower Tha       | 2 | 60  | N | Pass        |
| 256215 | F | Addis Abak Lower Tha      | 0 | 150 | Y | Withdrawn   |
| 258402 | F | South Regi A Level or I   | 1 | 180 | N | Withdrawn   |
| 259182 | M | Somalia Re Lower Tha      | 1 | 120 | N | Withdrawn   |
| 262294 | F | Amhara Re Lower Tha       | 2 | 60  | Y | Withdrawn   |
| 262454 | F | South Regi A Level or I   | 1 | 120 | Y | Fail        |
| 262741 | F | North Regi A Level or I   | 0 | 60  | N | Pass        |
| 263499 | F | South Wes Lower Tha       | 0 | 325 | N | Pass        |
| 263531 | F | South Wes Lower Tha       | 1 | 120 | N | Withdrawn   |
| 265405 | F | Amhara Re Lower Tha       | 1 | 60  | N | Withdrawn   |

|        |   |                           |   |     |   |             |
|--------|---|---------------------------|---|-----|---|-------------|
| 265958 | F | Amhara Re Lower Tha       | 2 | 120 | N | Withdrawn   |
| 267761 | F | South Regi A Level or I   | 1 | 120 | N | Pass        |
| 267853 | F | South Wes Lower Tha       | 0 | 120 | N | Fail        |
| 269076 | F | Sidamo Re Lower Tha       | 1 | 180 | N | Withdrawn   |
| 269289 | F | South Regi A Level or I   | 2 | 60  | N | Withdrawn   |
| 270399 | F | South Wes Lower Tha       | 0 | 60  | N | Fail        |
| 270567 | F | North Regi A Level or I   | 1 | 60  | N | Pass        |
| 271036 | F | South Wes Lower Tha       | 3 | 60  | N | Pass        |
| 272580 | F | South Wes Lower Tha       | 0 | 120 | N | Pass        |
| 273731 | F | Oromia Re A Level or I    | 0 | 60  | N | Pass        |
| 273877 | M | Sidamo Re Lower Tha       | 0 | 60  | N | Fail        |
| 276717 | F | South Regi A Level or I   | 0 | 120 | N | Distinction |
| 277733 | F | Afar Regio HE Qualific    | 1 | 60  | Y | Pass        |
| 278447 | F | Oromia Re A Level or I    | 0 | 60  | N | Pass        |
| 280962 | F | Somalia Re A Level or I   | 0 | 180 | N | Fail        |
| 281564 | F | Tigrai Regio Lower Tha    | 0 | 60  | N | Pass        |
| 284076 | F | South Regi A Level or I   | 0 | 120 | N | Pass        |
| 285633 | F | South Regi HE Qualific    | 1 | 120 | Y | Fail        |
| 285912 | F | Tigrai Regio HE Qualific  | 0 | 90  | N | Pass        |
| 288380 | F | South Wes Lower Tha       | 3 | 120 | Y | Fail        |
| 288990 | M | South Regi HE Qualific    | 1 | 60  | N | Withdrawn   |
| 290550 | F | South Wes A Level or I    | 0 | 120 | N | Pass        |
| 291037 | F | South Regi Lower Tha      | 0 | 120 | N | Pass        |
| 291194 | F | Addis Abak Lower Tha      | 0 | 90  | N | Pass        |
| 291701 | F | South Wes Lower Tha       | 0 | 150 | N | Withdrawn   |
| 292027 | M | Somalia Re Lower Tha      | 0 | 60  | N | Withdrawn   |
| 294381 | F | South Regi Lower Tha      | 0 | 60  | N | Fail        |
| 294961 | F | Sidamo Re A Level or I    | 2 | 300 | N | Pass        |
| 294999 | M | Tigrai Regio A Level or I | 0 | 60  | N | Withdrawn   |
| 295754 | F | Afar Regio A Level or I   | 0 | 120 | N | Pass        |
| 296408 | F | Somalia Re A Level or I   | 3 | 180 | Y | Withdrawn   |
| 297484 | F | North Regi A Level or I   | 1 | 60  | N | Pass        |
| 298322 | F | Addis Abak HE Qualific    | 1 | 120 | N | Pass        |
| 298476 | F | North Regi A Level or I   | 2 | 130 | N | Pass        |
| 299561 | F | South Regi A Level or I   | 1 | 60  | Y | Withdrawn   |
| 302550 | M | South Regi Lower Tha      | 1 | 180 | N | Withdrawn   |
| 305945 | F | Addis Abak A Level or I   | 0 | 60  | N | Withdrawn   |
| 306886 | F | South Regi Lower Tha      | 0 | 150 | N | Pass        |
| 306984 | M | North Regi Lower Tha      | 3 | 60  | N | Withdrawn   |
| 309175 | F | Sidamo Re Lower Tha       | 0 | 60  | N | Pass        |
| 309709 | M | Oromia Re Lower Tha       | 3 | 195 | N | Pass        |
| 309734 | F | Somalia Re Lower Tha      | 2 | 60  | N | Pass        |
| 311042 | F | Addis Abak Lower Tha      | 3 | 180 | N | Withdrawn   |
| 312141 | F | Sidamo Re Lower Tha       | 1 | 60  | N | Fail        |
| 313810 | F | South Regi A Level or I   | 0 | 60  | N | Distinction |
| 315186 | F | South Wes A Level or I    | 1 | 60  | N | Pass        |
| 316841 | F | Oromia Re A Level or I    | 0 | 60  | N | Pass        |

|        |   |             |              |   |     |   |             |
|--------|---|-------------|--------------|---|-----|---|-------------|
| 318056 | F | Tigrai Regi | A Level or I | 0 | 150 | N | Pass        |
| 318101 | F | Sidamo Re   | Lower Thar   | 0 | 60  | N | Fail        |
| 319209 | F | South Regi  | Post Gradu   | 0 | 120 | N | Distinction |
| 322745 | F | Afar Regio  | A Level or I | 0 | 60  | N | Fail        |
| 322960 | F | Tigrai Regi | Lower Thar   | 0 | 150 | N | Withdrawn   |
| 323914 | F | South Regi  | A Level or I | 0 | 60  | N | Fail        |
| 324236 | F | Tigrai Regi | Lower Thar   | 0 | 60  | N | Withdrawn   |
| 325511 | F | Addis Abat  | A Level or I | 0 | 180 | N | Pass        |
| 325879 | F | Sidamo Re   | Lower Thar   | 0 | 60  | N | Pass        |
| 326012 | F | Sidamo Re   | A Level or I | 0 | 90  | N | Fail        |
| 329226 | M | Afar Regio  | HE Qualific  | 0 | 120 | N | Pass        |
| 329321 | F | South Regi  | Lower Thar   | 2 | 60  | N | Fail        |
| 329800 | M | South Regi  | A Level or I | 0 | 60  | N | Pass        |
| 330376 | F | Somalia Re  | Lower Thar   | 2 | 60  | N | Withdrawn   |
| 331354 | F | Amhara Re   | A Level or I | 0 | 60  | N | Pass        |
| 331844 | F | South Wes   | A Level or I | 0 | 120 | N | Pass        |
| 333129 | F | Addis Abat  | Lower Thar   | 2 | 240 | N | Fail        |
| 333837 | F | Amhara Re   | Lower Thar   | 0 | 105 | N | Withdrawn   |
| 334291 | F | South Wes   | Lower Thar   | 1 | 90  | N | Fail        |
| 334794 | F | South Wes   | Lower Thar   | 0 | 60  | N | Withdrawn   |
| 335421 | F | South Wes   | A Level or I | 0 | 240 | N | Fail        |
| 335600 | F | Tigrai Regi | Lower Thar   | 3 | 150 | N | Fail        |
| 335910 | F | Oromia Re   | A Level or I | 0 | 90  | N | Fail        |
| 336165 | F | Somalia Re  | Lower Thar   | 1 | 120 | N | Fail        |
| 338056 | F | Afar Regio  | Lower Thar   | 1 | 120 | N | Pass        |
| 338861 | F | South Wes   | A Level or I | 0 | 60  | N | Fail        |
| 338912 | F | South Wes   | A Level or I | 0 | 90  | N | Withdrawn   |
| 339379 | F | Somalia Re  | A Level or I | 0 | 60  | N | Pass        |
| 339526 | F | Amhara Re   | Lower Thar   | 0 | 60  | N | Withdrawn   |
| 339946 | F | South Wes   | HE Qualific  | 0 | 60  | N | Withdrawn   |
| 340378 | F | Sidamo Re   | Lower Thar   | 0 | 120 | N | Withdrawn   |
| 340831 | M | South Regi  | A Level or I | 0 | 60  | N | Withdrawn   |
| 341040 | M | South Regi  | HE Qualific  | 0 | 60  | N | Withdrawn   |
| 341229 | F | Tigrai Regi | Lower Thar   | 0 | 60  | Y | Fail        |
| 341235 | M | South Regi  | Lower Thar   | 0 | 60  | N | Withdrawn   |
| 341509 | F | South Regi  | A Level or I | 0 | 180 | Y | Pass        |
| 349040 | F | North Regi  | HE Qualific  | 0 | 60  | N | Withdrawn   |
| 349424 | F | Sidamo Re   | A Level or I | 1 | 60  | N | Fail        |
| 350622 | F | Sidamo Re   | Lower Thar   | 0 | 60  | N | Fail        |
| 350795 | M | Somalia Re  | Lower Thar   | 1 | 60  | N | Fail        |
| 351271 | F | Afar Regio  | HE Qualific  | 0 | 120 | N | Pass        |
| 351290 | F | Somalia Re  | Lower Thar   | 2 | 60  | N | Pass        |
| 351543 | F | Tigrai Regi | Lower Thar   | 1 | 120 | N | Fail        |
| 352161 | F | South Wes   | Lower Thar   | 1 | 195 | N | Withdrawn   |
| 352364 | F | South Regi  | A Level or I | 0 | 60  | N | Distinction |
| 353093 | F | Tigrai Regi | Lower Thar   | 0 | 60  | N | Pass        |
| 353352 | F | Afar Regio  | Lower Thar   | 0 | 120 | N | Fail        |

|        |   |                          |   |     |   |             |
|--------|---|--------------------------|---|-----|---|-------------|
| 353918 | F | Amhara Re Lower Tha      | 2 | 120 | N | Withdrawn   |
| 354058 | F | Amhara Re Lower Tha      | 0 | 60  | N | Fail        |
| 354815 | F | Somalia Re Lower Tha     | 2 | 120 | N | Withdrawn   |
| 354895 | F | Somalia Re Lower Tha     | 0 | 60  | N | Withdrawn   |
| 355369 | F | Sidamo Re A Level or I   | 1 | 120 | N | Withdrawn   |
| 355998 | F | Tigrai Regi A Level or I | 0 | 180 | N | Fail        |
| 357030 | F | South Wes Lower Tha      | 0 | 60  | N | Withdrawn   |
| 357038 | F | South Wes HE Qualific    | 2 | 180 | N | Fail        |
| 357928 | F | Tigrai Regi A Level or I | 0 | 90  | N | Fail        |
| 359170 | F | Sidamo Re A Level or I   | 0 | 180 | N | Withdrawn   |
| 360188 | F | South Wes Lower Tha      | 0 | 120 | N | Pass        |
| 360489 | F | South Regi A Level or I  | 0 | 240 | Y | Withdrawn   |
| 360877 | M | South Regi HE Qualific   | 1 | 120 | N | Pass        |
| 361603 | M | Amhara Re A Level or I   | 1 | 60  | N | Pass        |
| 362760 | F | Tigrai Regi A Level or I | 0 | 180 | N | Fail        |
| 362877 | F | Tigrai Regi Lower Tha    | 0 | 60  | N | Withdrawn   |
| 363401 | M | Addis Abak Lower Tha     | 1 | 120 | N | Fail        |
| 363416 | F | Sidamo Re Lower Tha      | 0 | 240 | N | Pass        |
| 363660 | M | Oromia Re A Level or I   | 1 | 180 | N | Distinction |
| 364323 | F | Sidamo Re HE Qualific    | 0 | 120 | N | Withdrawn   |
| 365439 | F | Oromia Re HE Qualific    | 0 | 120 | N | Fail        |
| 365452 | F | Addis Abak Lower Tha     | 0 | 60  | Y | Pass        |
| 365488 | F | Tigrai Regi A Level or I | 1 | 60  | N | Fail        |
| 365707 | F | Oromia Re A Level or I   | 0 | 60  | N | Distinction |
| 366821 | F | South Regi Lower Tha     | 0 | 60  | N | Fail        |
| 367304 | F | Sidamo Re A Level or I   | 2 | 60  | N | Fail        |
| 367348 | F | South Regi Lower Tha     | 0 | 60  | N | Fail        |
| 367609 | M | Tigrai Regi Lower Tha    | 0 | 60  | N | Pass        |
| 368439 | F | Sidamo Re Lower Tha      | 1 | 60  | N | Fail        |
| 369212 | F | South Wes A Level or I   | 1 | 60  | N | Withdrawn   |
| 370302 | M | North Regi Lower Tha     | 0 | 60  | N | Fail        |
| 370720 | F | Sidamo Re Lower Tha      | 1 | 120 | N | Fail        |
| 371679 | F | Oromia Re Lower Tha      | 2 | 120 | N | Pass        |
| 372624 | F | South Regi Lower Tha     | 1 | 300 | Y | Withdrawn   |
| 374102 | F | Somalia Re Lower Tha     | 0 | 60  | Y | Fail        |
| 374234 | F | South Regi HE Qualific   | 1 | 120 | N | Pass        |
| 375312 | F | Tigrai Regi Lower Tha    | 1 | 180 | N | Withdrawn   |
| 376617 | M | South Regi Lower Tha     | 0 | 60  | N | Pass        |
| 377695 | F | South Wes A Level or I   | 0 | 180 | N | Withdrawn   |
| 377759 | F | Sidamo Re A Level or I   | 1 | 120 | Y | Pass        |
| 377846 | M | Addis Abak Lower Tha     | 0 | 150 | N | Pass        |
| 377905 | F | Somalia Re Lower Tha     | 2 | 150 | N | Fail        |
| 378462 | F | South Wes A Level or I   | 0 | 120 | N | Pass        |
| 378543 | M | Oromia Re HE Qualific    | 0 | 120 | N | Pass        |
| 378721 | F | Tigrai Regi Lower Tha    | 0 | 120 | N | Withdrawn   |
| 379402 | F | South Wes A Level or I   | 1 | 105 | N | Fail        |
| 379405 | F | Amhara Re A Level or I   | 0 | 120 | N | Withdrawn   |

|        |   |             |             |   |     |   |             |
|--------|---|-------------|-------------|---|-----|---|-------------|
| 380151 | F | Sidamo Re   | A Level or  | 0 | 60  | Y | Withdrawn   |
| 381640 | F | Oromia Re   | HE Qualific | 0 | 135 | N | Fail        |
| 381722 | F | South Regi  | A Level or  | 0 | 150 | N | Withdrawn   |
| 383828 | F | Addis Abak  | HE Qualific | 1 | 180 | N | Withdrawn   |
| 384678 | M | Sidamo Re   | HE Qualific | 0 | 60  | N | Fail        |
| 384909 | F | Addis Abak  | A Level or  | 0 | 120 | N | Withdrawn   |
| 385034 | F | Somalia Re  | A Level or  | 0 | 120 | N | Withdrawn   |
| 386348 | M | Somalia Re  | Lower Than  | 1 | 120 | Y | Pass        |
| 386957 | F | Tigrai Regi | Lower Than  | 0 | 60  | N | Fail        |
| 387276 | F | Amhara Re   | Lower Than  | 1 | 180 | N | Withdrawn   |
| 387702 | F | South Regi  | A Level or  | 0 | 60  | N | Fail        |
| 388014 | F | Sidamo Re   | A Level or  | 0 | 60  | N | Withdrawn   |
| 388205 | F | Sidamo Re   | A Level or  | 0 | 120 | N | Fail        |
| 388360 | F | South Wes   | A Level or  | 0 | 60  | N | Fail        |
| 388410 | F | Sidamo Re   | Lower Than  | 0 | 60  | N | Fail        |
| 388484 | F | Afar Regio  | Lower Than  | 0 | 60  | N | Fail        |
| 389369 | M | Tigrai Regi | A Level or  | 0 | 120 | N | Distinction |
| 390220 | F | Oromia Re   | Lower Than  | 3 | 120 | N | Pass        |
| 390442 | F | South Regi  | A Level or  | 0 | 60  | Y | Distinction |
| 390461 | F | Addis Abak  | HE Qualific | 0 | 90  | N | Fail        |
| 392213 | F | Addis Abak  | Lower Than  | 1 | 120 | N | Pass        |
| 392281 | F | North Regi  | A Level or  | 0 | 120 | N | Withdrawn   |
| 392428 | F | South Wes   | HE Qualific | 1 | 120 | N | Pass        |
| 392614 | F | Addis Abak  | A Level or  | 2 | 120 | N | Fail        |
| 393327 | F | Somalia Re  | A Level or  | 2 | 120 | Y | Withdrawn   |
| 394956 | F | Addis Abak  | A Level or  | 1 | 195 | N | Withdrawn   |
| 395107 | F | Addis Abak  | Lower Than  | 0 | 180 | N | Withdrawn   |
| 395229 | F | South Regi  | Lower Than  | 1 | 330 | Y | Fail        |
| 397118 | F | North Regi  | Lower Than  | 0 | 120 | N | Pass        |
| 397763 | F | South Regi  | Lower Than  | 1 | 60  | Y | Withdrawn   |
| 398084 | F | Sidamo Re   | Lower Than  | 0 | 60  | N | Pass        |
| 398949 | F | Sidamo Re   | A Level or  | 0 | 60  | N | Withdrawn   |
| 398965 | F | Sidamo Re   | A Level or  | 1 | 120 | Y | Withdrawn   |
| 399108 | F | Somalia Re  | A Level or  | 0 | 60  | N | Withdrawn   |
| 399792 | M | Afar Regio  | HE Qualific | 2 | 150 | Y | Fail        |
| 400049 | F | Sidamo Re   | A Level or  | 1 | 60  | N | Fail        |
| 400469 | F | Sidamo Re   | A Level or  | 1 | 60  | N | Pass        |
| 400474 | F | Addis Abak  | A Level or  | 0 | 120 | N | Pass        |
| 400718 | F | South Regi  | HE Qualific | 1 | 150 | N | Withdrawn   |
| 400894 | F | Afar Regio  | A Level or  | 1 | 120 | N | Pass        |
| 401339 | F | Sidamo Re   | A Level or  | 0 | 120 | N | Pass        |
| 401349 | F | South Regi  | A Level or  | 0 | 60  | N | Distinction |
| 402660 | F | Somalia Re  | Lower Than  | 0 | 60  | N | Withdrawn   |
| 403093 | F | Addis Abak  | Lower Than  | 0 | 60  | Y | Pass        |
| 403191 | M | South Regi  | HE Qualific | 0 | 60  | N | Withdrawn   |
| 404022 | F | South Wes   | A Level or  | 0 | 60  | N | Pass        |
| 404727 | F | South Regi  | Lower Than  | 1 | 60  | N | Fail        |

|        |   |                         |   |     |   |             |
|--------|---|-------------------------|---|-----|---|-------------|
| 405471 | M | Oromia Re Lower Tha     | 1 | 120 | N | Pass        |
| 405746 | F | South Wes Lower Tha     | 0 | 90  | N | Withdrawn   |
| 405995 | F | Oromia Re A Level or I  | 2 | 120 | N | Pass        |
| 406311 | M | Afar Regio No Formal    | 0 | 60  | N | Fail        |
| 406416 | F | South Wes HE Qualific   | 0 | 120 | N | Withdrawn   |
| 406974 | M | South Regi A Level or I | 0 | 120 | N | Withdrawn   |
| 408112 | F | Somalia Re Lower Tha    | 0 | 60  | Y | Pass        |
| 409662 | F | Addis Abak Lower Tha    | 0 | 60  | N | Pass        |
| 410739 | F | Somalia Re Lower Tha    | 0 | 120 | N | Pass        |
| 411197 | F | Sidamo Re A Level or I  | 2 | 60  | N | Fail        |
| 412407 | M | Oromia Re A Level or I  | 1 | 60  | N | Pass        |
| 412654 | M | Afar Regio A Level or I | 1 | 60  | N | Pass        |
| 413984 | F | Sidamo Re Lower Tha     | 1 | 60  | N | Pass        |
| 414958 | F | South Regi A Level or I | 1 | 60  | N | Pass        |
| 415548 | F | Amhara Re Lower Tha     | 1 | 90  | N | Withdrawn   |
| 415716 | F | South Wes A Level or I  | 0 | 60  | N | Distinction |
| 415760 | F | South Regi Lower Tha    | 1 | 180 | N | Pass        |
| 416007 | F | Afar Regio A Level or I | 2 | 120 | N | Pass        |
| 416314 | M | North Regi Lower Tha    | 0 | 60  | N | Fail        |
| 416654 | F | Afar Regio A Level or I | 0 | 60  | N | Pass        |
| 417462 | F | South Regi A Level or I | 1 | 60  | N | Fail        |
| 418065 | M | North Regi A Level or I | 0 | 60  | N | Withdrawn   |
| 418325 | F | Sidamo Re Lower Tha     | 0 | 60  | N | Pass        |
| 420604 | F | Afar Regio A Level or I | 2 | 120 | N | Fail        |
| 421205 | F | Tigrai Regi Lower Tha   | 0 | 180 | N | Fail        |
| 422070 | F | Somalia Re A Level or I | 1 | 90  | N | Fail        |
| 422752 | F | Amhara Re Lower Tha     | 0 | 60  | Y | Withdrawn   |
| 423314 | M | Addis Abak A Level or I | 0 | 60  | N | Fail        |
| 423317 | F | Somalia Re Lower Tha    | 0 | 60  | N | Withdrawn   |
| 423871 | F | Sidamo Re A Level or I  | 0 | 90  | N | Pass        |
| 425747 | F | Sidamo Re A Level or I  | 1 | 120 | N | Fail        |
| 425808 | F | Afar Regio A Level or I | 0 | 60  | N | Pass        |
| 425817 | M | Somalia Re Lower Tha    | 0 | 120 | N | Withdrawn   |
| 425820 | F | Afar Regio A Level or I | 0 | 60  | N | Pass        |
| 426650 | F | North Regi A Level or I | 1 | 60  | N | Pass        |
| 426838 | F | Addis Abak Lower Tha    | 0 | 60  | N | Pass        |
| 427536 | F | Sidamo Re HE Qualific   | 0 | 120 | N | Pass        |
| 427704 | M | South Regi Lower Tha    | 0 | 120 | Y | Pass        |
| 427773 | F | Sidamo Re A Level or I  | 0 | 120 | N | Pass        |
| 429038 | F | Amhara Re Lower Tha     | 0 | 60  | N | Pass        |
| 429158 | F | South Regi Lower Tha    | 1 | 120 | N | Withdrawn   |
| 429494 | F | Somalia Re Lower Tha    | 2 | 240 | N | Fail        |
| 430160 | M | Afar Regio Lower Tha    | 1 | 75  | N | Withdrawn   |
| 430357 | F | Sidamo Re A Level or I  | 2 | 120 | N | Fail        |
| 431071 | F | South Wes Lower Tha     | 1 | 120 | N | Withdrawn   |
| 432004 | F | Sidamo Re HE Qualific   | 0 | 120 | N | Fail        |
| 432232 | F | South Regi HE Qualific  | 0 | 60  | N | Pass        |



|        |   |                          |   |     |   |             |
|--------|---|--------------------------|---|-----|---|-------------|
| 432319 | F | South Regi A Level or l  | 2 | 120 | N | Withdrawn   |
| 432870 | M | Amhara Re A Level or l   | 1 | 240 | N | Pass        |
| 433531 | F | South Regi A Level or l  | 0 | 180 | N | Pass        |
| 433755 | M | South Wes A Level or l   | 1 | 180 | N | Pass        |
| 433939 | F | Sidamo Re Lower Than     | 0 | 60  | N | Fail        |
| 434094 | F | Tigrai Regi A Level or l | 1 | 60  | N | Fail        |
| 434192 | F | Tigrai Regi A Level or l | 2 | 120 | N | Pass        |
| 434353 | F | Oromia Re HE Qualific    | 1 | 60  | N | Pass        |
| 434646 | F | Sidamo Re HE Qualific    | 1 | 270 | N | Pass        |
| 435245 | F | Sidamo Re Lower Than     | 0 | 60  | N | Pass        |
| 435803 | F | Tigrai Regi Lower Than   | 1 | 120 | N | Fail        |
| 437562 | F | South Regi Lower Than    | 0 | 60  | N | Pass        |
| 437967 | F | Sidamo Re Lower Than     | 1 | 60  | N | Pass        |
| 438210 | F | Oromia Re HE Qualific    | 0 | 90  | N | Withdrawn   |
| 438379 | F | South Wes Lower Than     | 2 | 210 | N | Withdrawn   |
| 438703 | F | Tigrai Regi A Level or l | 0 | 60  | N | Pass        |
| 439857 | M | South Regi A Level or l  | 0 | 120 | N | Pass        |
| 440057 | F | Tigrai Regi Lower Than   | 2 | 120 | N | Pass        |
| 440509 | F | Tigrai Regi HE Qualific  | 0 | 120 | N | Pass        |
| 441000 | F | Tigrai Regi Lower Than   | 0 | 60  | N | Fail        |
| 441181 | F | Addis Abak HE Qualific   | 0 | 120 | N | Pass        |
| 441255 | F | South Wes A Level or l   | 0 | 60  | N | Distinction |
| 441423 | F | South Wes A Level or l   | 0 | 120 | N | Withdrawn   |
| 442012 | F | South Wes Lower Than     | 1 | 60  | N | Pass        |
| 442143 | F | South Wes A Level or l   | 0 | 120 | N | Withdrawn   |
| 442183 | F | Sidamo Re A Level or l   | 1 | 120 | N | Pass        |
| 442456 | M | Sidamo Re HE Qualific    | 1 | 60  | N | Fail        |
| 442466 | F | Oromia Re A Level or l   | 2 | 240 | Y | Pass        |
| 443108 | F | Somalia Re A Level or l  | 0 | 60  | N | Withdrawn   |
| 443288 | F | Afar Regio HE Qualific   | 0 | 60  | N | Distinction |
| 443452 | M | Oromia Re Lower Than     | 1 | 180 | N | Fail        |
| 444117 | F | Amhara Re A Level or l   | 0 | 90  | N | Distinction |
| 444408 | F | Addis Abak No Formal     | 1 | 60  | Y | Fail        |
| 444784 | F | Tigrai Regi A Level or l | 0 | 120 | N | Fail        |
| 444926 | F | Somalia Re Lower Than    | 1 | 180 | Y | Pass        |
| 445065 | F | Sidamo Re Lower Than     | 0 | 60  | N | Distinction |
| 445125 | F | South Regi A Level or l  | 0 | 60  | N | Fail        |
| 445889 | F | Sidamo Re A Level or l   | 1 | 60  | N | Pass        |
| 446045 | F | South Regi Lower Than    | 0 | 60  | N | Pass        |
| 446145 | M | Afar Regio A Level or l  | 0 | 60  | N | Fail        |
| 446247 | F | Afar Regio HE Qualific   | 1 | 60  | N | Withdrawn   |
| 446357 | F | South Regi Lower Than    | 0 | 60  | N | Withdrawn   |
| 446856 | F | South Wes Lower Than     | 0 | 150 | N | Fail        |
| 447007 | F | Afar Regio Lower Than    | 0 | 150 | N | Withdrawn   |
| 447759 | F | South Regi HE Qualific   | 1 | 60  | Y | Pass        |
| 447782 | M | Sidamo Re HE Qualific    | 0 | 60  | N | Distinction |
| 447790 | F | Amhara Re Lower Than     | 1 | 60  | N | Withdrawn   |

|        |   |                |              |   |     |   |             |
|--------|---|----------------|--------------|---|-----|---|-------------|
| 465599 | F | Afar Region    | A Level or I | 1 | 60  | N | Pass        |
| 465730 | F | Tigray Region  | A Level or I | 1 | 120 | N | Withdrawn   |
| 466037 | F | South Region   | Lower Than   | 1 | 120 | N | Fail        |
| 466800 | F | Afar Region    | Lower Than   | 1 | 60  | N | Withdrawn   |
| 466810 | F | Somalia Region | A Level or I | 0 | 60  | Y | Pass        |
| 466959 | M | Amhara Region  | A Level or I | 0 | 60  | N | Fail        |
| 466973 | F | Oromia Region  | Lower Than   | 1 | 60  | N | Fail        |
| 467035 | F | South West     | HE Qualific  | 1 | 135 | N | Pass        |
| 467292 | F | Sidamo Region  | A Level or I | 0 | 60  | N | Pass        |
| 467756 | F | Sidamo Region  | A Level or I | 2 | 180 | N | Fail        |
| 467835 | F | Sidamo Region  | Lower Than   | 0 | 60  | N | Withdrawn   |
| 468021 | F | Somalia Region | A Level or I | 2 | 120 | N | Fail        |
| 468792 | F | Tigray Region  | HE Qualific  | 0 | 120 | N | Withdrawn   |
| 468949 | F | Oromia Region  | Lower Than   | 0 | 60  | Y | Pass        |
| 469683 | F | Afar Region    | A Level or I | 2 | 180 | N | Pass        |
| 470318 | F | South Region   | HE Qualific  | 0 | 120 | N | Pass        |
| 470653 | F | Amhara Region  | Lower Than   | 0 | 60  | N | Fail        |
| 471219 | F | Amhara Region  | HE Qualific  | 1 | 120 | N | Fail        |
| 471525 | F | Addis Ababa    | Lower Than   | 1 | 60  | N | Pass        |
| 472182 | F | Oromia Region  | A Level or I | 0 | 120 | Y | Withdrawn   |
| 472348 | F | Sidamo Region  | No Formal    | 1 | 120 | N | Withdrawn   |
| 472586 | F | Addis Ababa    | HE Qualific  | 0 | 120 | N | Pass        |
| 473095 | F | Somalia Region | A Level or I | 1 | 120 | N | Fail        |
| 473328 | F | Oromia Region  | Lower Than   | 0 | 180 | N | Pass        |
| 475078 | F | South West     | Lower Than   | 1 | 120 | N | Withdrawn   |
| 475095 | M | South West     | A Level or I | 0 | 60  | N | Pass        |
| 475460 | F | Addis Ababa    | A Level or I | 0 | 60  | N | Fail        |
| 475688 | M | Amhara Region  | A Level or I | 0 | 120 | Y | Pass        |
| 475901 | F | North Region   | Lower Than   | 0 | 90  | N | Fail        |
| 476037 | F | South Region   | Lower Than   | 0 | 60  | N | Withdrawn   |
| 476201 | M | Sidamo Region  | HE Qualific  | 0 | 60  | N | Distinction |
| 476297 | F | Afar Region    | A Level or I | 1 | 120 | N | Withdrawn   |
| 476369 | F | South Region   | HE Qualific  | 0 | 60  | N | Pass        |
| 476457 | F | North Region   | Lower Than   | 1 | 120 | N | Withdrawn   |
| 476596 | F | Sidamo Region  | Lower Than   | 0 | 60  | N | Pass        |
| 476709 | F | Oromia Region  | HE Qualific  | 0 | 120 | N | Pass        |
| 476710 | F | Sidamo Region  | Lower Than   | 1 | 120 | Y | Pass        |
| 476783 | F | South Region   | A Level or I | 0 | 90  | N | Distinction |
| 476816 | F | Sidamo Region  | A Level or I | 1 | 150 | N | Withdrawn   |
| 476855 | F | South Region   | Lower Than   | 1 | 180 | N | Withdrawn   |
| 476859 | F | Sidamo Region  | A Level or I | 1 | 120 | N | Fail        |
| 477009 | F | Tigray Region  | A Level or I | 0 | 60  | N | Fail        |
| 477011 | F | Sidamo Region  | A Level or I | 0 | 60  | N | Pass        |
| 477164 | M | South West     | A Level or I | 0 | 60  | N | Pass        |
| 477167 | F | Afar Region    | HE Qualific  | 0 | 120 | N | Distinction |
| 477734 | F | Addis Ababa    | No Formal    | 0 | 120 | N | Pass        |
| 477835 | F | South West     | A Level or I | 0 | 60  | N | Withdrawn   |

|        |   |                             |   |     |   |             |
|--------|---|-----------------------------|---|-----|---|-------------|
| 478317 | F | Afar Region Lower Thar      | 1 | 120 | N | Withdrawn   |
| 478444 | F | South Region Lower Thar     | 1 | 180 | N | Distinction |
| 478718 | F | Addis Ababa Lower Thar      | 0 | 60  | N | Withdrawn   |
| 478792 | F | Amhara Region Lower Thar    | 0 | 120 | N | Fail        |
| 478873 | F | Amhara Region Lower Thar    | 0 | 60  | N | Fail        |
| 479060 | F | Addis Ababa A Level or I    | 0 | 60  | N | Distinction |
| 479171 | F | Oromia Region Lower Thar    | 0 | 60  | N | Pass        |
| 479267 | F | South Region Lower Thar     | 1 | 120 | Y | Withdrawn   |
| 479343 | F | Sidamo Region A Level or I  | 1 | 120 | N | Pass        |
| 479516 | F | Afar Region HE Qualific     | 0 | 60  | N | Pass        |
| 479519 | F | South Region No Formal      | 1 | 120 | N | Fail        |
| 480151 | F | Sidamo Region Lower Thar    | 0 | 60  | N | Withdrawn   |
| 480382 | M | Oromia Region A Level or I  | 0 | 120 | N | Pass        |
| 480458 | M | Tigray Region HE Qualific   | 0 | 180 | N | Fail        |
| 480507 | F | Afar Region Lower Thar      | 0 | 60  | N | Pass        |
| 480554 | F | South Region Lower Thar     | 0 | 60  | N | Pass        |
| 480650 | F | North Region A Level or I   | 0 | 60  | N | Distinction |
| 480815 | F | Somalia Region A Level or I | 0 | 120 | N | Pass        |
| 481010 | F | South Region A Level or I   | 0 | 60  | N | Distinction |
| 481143 | F | Amhara Region Lower Thar    | 0 | 60  | N | Fail        |
| 481580 | F | Addis Ababa A Level or I    | 0 | 60  | N | Distinction |
| 481607 | F | Amhara Region Lower Thar    | 0 | 120 | N | Distinction |
| 482467 | F | South Region Lower Thar     | 0 | 60  | N | Pass        |
| 482710 | M | South Region A Level or I   | 0 | 60  | N | Pass        |
| 482766 | F | South Region HE Qualific    | 0 | 120 | N | Pass        |
| 482945 | M | Tigray Region Lower Thar    | 0 | 60  | Y | Withdrawn   |
| 483064 | F | North Region A Level or I   | 0 | 60  | N | Pass        |
| 483074 | F | Addis Ababa Lower Thar      | 0 | 120 | N | Distinction |
| 483109 | F | Sidamo Region HE Qualific   | 0 | 60  | N | Pass        |
| 483243 | F | Amhara Region Lower Thar    | 0 | 135 | Y | Pass        |
| 483309 | M | South Region A Level or I   | 0 | 60  | N | Withdrawn   |
| 483371 | F | Afar Region HE Qualific     | 0 | 120 | N | Withdrawn   |
| 483411 | F | Somalia Region Lower Thar   | 1 | 120 | N | Fail        |
| 483479 | F | Sidamo Region A Level or I  | 0 | 180 | N | Fail        |
| 483952 | F | Addis Ababa Lower Thar      | 0 | 120 | N | Fail        |
| 484039 | F | Sidamo Region A Level or I  | 0 | 180 | N | Fail        |
| 484135 | F | Sidamo Region HE Qualific   | 0 | 60  | N | Withdrawn   |
| 484161 | F | South West Lower Thar       | 0 | 120 | N | Fail        |
| 484768 | F | Sidamo Region No Formal     | 1 | 240 | N | Pass        |
| 484885 | F | North Region Lower Thar     | 1 | 180 | N | Fail        |
| 484933 | F | Sidamo Region A Level or I  | 0 | 60  | N | Pass        |
| 485352 | F | Addis Ababa A Level or I    | 0 | 240 | N | Withdrawn   |
| 485399 | F | South Region Lower Thar     | 1 | 180 | N | Pass        |
| 485568 | F | South West Lower Thar       | 0 | 180 | N | Fail        |
| 485630 | F | Addis Ababa A Level or I    | 1 | 120 | N | Pass        |
| 485782 | F | Somalia Region Lower Thar   | 1 | 180 | N | Fail        |
| 486099 | F | South Region A Level or I   | 1 | 180 | N | Pass        |

|        |   |                           |   |     |   |             |
|--------|---|---------------------------|---|-----|---|-------------|
| 486214 | F | Sidamo Re Lower Tha       | 1 | 120 | N | Withdrawn   |
| 486282 | F | South Wes Lower Tha       | 1 | 120 | Y | Fail        |
| 486391 | F | Tigrai Regio Lower Tha    | 1 | 120 | N | Pass        |
| 486521 | F | South Wes Lower Tha       | 1 | 120 | N | Fail        |
| 486650 | F | Somalia Re HE Qualific    | 0 | 120 | N | Withdrawn   |
| 486656 | F | Sidamo Re A Level or I    | 1 | 120 | N | Distinction |
| 487329 | F | Sidamo Re A Level or I    | 1 | 180 | N | Fail        |
| 487646 | F | Addis Abak Lower Tha      | 1 | 120 | N | Fail        |
| 488185 | F | Amhara Re Lower Tha       | 0 | 120 | N | Fail        |
| 488364 | F | Afar Regio HE Qualific    | 0 | 60  | N | Fail        |
| 488425 | M | Oromia Re Lower Tha       | 0 | 60  | N | Fail        |
| 488477 | F | Afar Regio A Level or I   | 0 | 60  | N | Withdrawn   |
| 488863 | F | Oromia Re A Level or I    | 0 | 60  | N | Pass        |
| 488929 | F | Oromia Re Lower Tha       | 0 | 60  | Y | Withdrawn   |
| 489251 | F | South Regi Lower Tha      | 0 | 60  | N | Pass        |
| 490110 | F | South Regi A Level or I   | 0 | 60  | N | Withdrawn   |
| 490152 | F | Sidamo Re A Level or I    | 0 | 180 | N | Fail        |
| 490514 | F | South Regi Lower Tha      | 0 | 60  | N | Pass        |
| 490733 | F | Sidamo Re Lower Tha       | 0 | 60  | N | Withdrawn   |
| 492182 | F | South Regi A Level or I   | 0 | 120 | N | Pass        |
| 492240 | F | South Regi A Level or I   | 1 | 120 | N | Pass        |
| 492336 | M | Addis Abak Lower Tha      | 0 | 120 | N | Withdrawn   |
| 492590 | F | Amhara Re Lower Tha       | 0 | 60  | N | Fail        |
| 492946 | F | Sidamo Re A Level or I    | 1 | 120 | N | Fail        |
| 493186 | F | Tigrai Regio Lower Tha    | 1 | 120 | N | Pass        |
| 493377 | F | Addis Abak A Level or I   | 0 | 60  | Y | Withdrawn   |
| 493451 | F | South Regi A Level or I   | 0 | 60  | N | Fail        |
| 493515 | F | South Wes Lower Tha       | 0 | 135 | Y | Fail        |
| 493773 | M | Sidamo Re A Level or I    | 0 | 120 | N | Fail        |
| 493912 | F | Amhara Re Lower Tha       | 0 | 60  | N | Pass        |
| 493958 | F | Oromia Re A Level or I    | 0 | 135 | N | Pass        |
| 494095 | F | Amhara Re Lower Tha       | 0 | 60  | N | Pass        |
| 494278 | F | Amhara Re Lower Tha       | 0 | 60  | N | Pass        |
| 494304 | F | Oromia Re Lower Tha       | 1 | 210 | N | Fail        |
| 494673 | F | Somalia Re Lower Tha      | 0 | 60  | N | Fail        |
| 494786 | F | Sidamo Re A Level or I    | 0 | 60  | N | Distinction |
| 494838 | F | Sidamo Re A Level or I    | 1 | 180 | N | Fail        |
| 494840 | F | Sidamo Re A Level or I    | 1 | 240 | N | Withdrawn   |
| 494927 | F | Afar Regio HE Qualific    | 1 | 120 | N | Withdrawn   |
| 495324 | F | Addis Abak A Level or I   | 1 | 135 | N | Withdrawn   |
| 495377 | F | Addis Abak A Level or I   | 0 | 120 | N | Withdrawn   |
| 495674 | F | Tigrai Regio Lower Tha    | 1 | 120 | Y | Fail        |
| 495856 | M | South Regi A Level or I   | 0 | 60  | N | Distinction |
| 495875 | F | Sidamo Re Lower Tha       | 0 | 60  | N | Withdrawn   |
| 495913 | F | Tigrai Regio A Level or I | 1 | 120 | N | Withdrawn   |
| 496041 | F | South Regi Lower Tha      | 1 | 120 | N | Pass        |
| 496070 | F | Sidamo Re A Level or I    | 0 | 60  | N | Pass        |

|        |   |                          |   |     |   |             |
|--------|---|--------------------------|---|-----|---|-------------|
| 496220 | F | Oromia Re Lower Tha      | 0 | 60  | Y | Pass        |
| 496243 | F | Afar Region A Level or I | 1 | 180 | N | Fail        |
| 496674 | F | Somalia Re A Level or I  | 1 | 180 | N | Fail        |
| 497088 | F | South Regi A Level or I  | 0 | 60  | N | Pass        |
| 497278 | F | Somalia Re A Level or I  | 0 | 60  | Y | Withdrawn   |
| 497280 | F | South Regi Lower Tha     | 0 | 60  | N | Pass        |
| 497468 | F | Sidamo Re A Level or I   | 0 | 90  | N | Pass        |
| 497607 | F | North Regi Lower Tha     | 1 | 120 | N | Fail        |
| 497793 | F | North Regi Lower Tha     | 0 | 150 | N | Pass        |
| 498065 | F | South Regi HE Qualific   | 0 | 60  | N | Pass        |
| 498131 | F | Addis Abak Lower Tha     | 0 | 60  | N | Pass        |
| 498175 | F | South Wes Lower Tha      | 1 | 120 | N | Pass        |
| 498296 | F | Addis Abak A Level or I  | 0 | 60  | Y | Pass        |
| 498371 | F | Amhara Re A Level or I   | 0 | 60  | N | Withdrawn   |
| 498455 | F | Tigrai Regi Lower Tha    | 0 | 60  | N | Fail        |
| 498967 | F | Somalia Re Lower Tha     | 0 | 60  | N | Pass        |
| 499027 | F | South Regi Lower Tha     | 0 | 60  | N | Pass        |
| 499067 | F | Oromia Re Lower Tha      | 0 | 60  | Y | Fail        |
| 499118 | F | Tigrai Regi A Level or I | 1 | 120 | N | Pass        |
| 499380 | F | Sidamo Re A Level or I   | 0 | 60  | N | Distinction |
| 499387 | F | South Wes A Level or I   | 0 | 60  | N | Pass        |
| 499483 | F | North Regi A Level or I  | 0 | 60  | N | Pass        |
| 499511 | F | South Wes A Level or I   | 1 | 120 | N | Distinction |
| 499891 | F | North Regi Lower Tha     | 0 | 60  | N | Pass        |
| 499931 | F | Amhara Re A Level or I   | 1 | 240 | N | Fail        |
| 500507 | F | Sidamo Re A Level or I   | 0 | 60  | N | Withdrawn   |
| 500585 | F | Sidamo Re A Level or I   | 1 | 240 | Y | Withdrawn   |
| 500659 | F | Amhara Re A Level or I   | 0 | 120 | Y | Withdrawn   |
| 500719 | M | North Regi Lower Tha     | 0 | 60  | N | Withdrawn   |
| 500791 | F | Addis Abak Lower Tha     | 0 | 60  | N | Pass        |
| 500815 | F | South Wes A Level or I   | 0 | 60  | N | Pass        |
| 500819 | F | Oromia Re Lower Tha      | 0 | 60  | N | Pass        |
| 500836 | M | South Regi A Level or I  | 1 | 240 | Y | Fail        |
| 500958 | M | North Regi Lower Tha     | 1 | 180 | N | Pass        |
| 501008 | F | Sidamo Re A Level or I   | 1 | 180 | N | Withdrawn   |
| 501432 | F | South Regi A Level or I  | 0 | 60  | N | Distinction |
| 501550 | F | South Regi A Level or I  | 1 | 120 | N | Pass        |
| 501879 | F | Addis Abak A Level or I  | 1 | 180 | N | Pass        |
| 501955 | M | South Wes Lower Tha      | 1 | 120 | Y | Fail        |
| 502088 | F | South Wes A Level or I   | 0 | 120 | Y | Fail        |
| 502131 | F | Afar Region Lower Tha    | 1 | 120 | N | Withdrawn   |
| 502279 | F | South Regi HE Qualific   | 1 | 180 | N | Withdrawn   |
| 502441 | F | South Wes A Level or I   | 0 | 60  | N | Distinction |
| 502604 | F | South Regi HE Qualific   | 0 | 90  | N | Pass        |
| 502694 | F | North Regi A Level or I  | 0 | 60  | N | Distinction |
| 502713 | F | Tigrai Regi No Formal    | 0 | 60  | N | Fail        |
| 502717 | F | Tigrai Regi Lower Tha    | 1 | 240 | N | Pass        |

|        |   |                          |   |     |   |             |
|--------|---|--------------------------|---|-----|---|-------------|
| 502872 | F | Amhara Re A Level or I   | 0 | 180 | N | Fail        |
| 503353 | F | Amhara Re A Level or I   | 0 | 210 | N | Withdrawn   |
| 503390 | F | Sidamo Re A Level or I   | 1 | 240 | N | Fail        |
| 503491 | F | South Regi Lower Tha     | 1 | 120 | N | Pass        |
| 503509 | F | Oromia Re A Level or I   | 0 | 60  | N | Distinction |
| 503878 | F | South Wes Lower Tha      | 0 | 180 | Y | Withdrawn   |
| 504014 | F | Tigrai Regi Lower Tha    | 0 | 120 | N | Fail        |
| 504021 | F | Amhara Re Lower Tha      | 0 | 60  | N | Withdrawn   |
| 504028 | F | Sidamo Re A Level or I   | 1 | 180 | N | Pass        |
| 504102 | F | Amhara Re Lower Tha      | 0 | 75  | N | Pass        |
| 504689 | F | Sidamo Re A Level or I   | 0 | 120 | N | Withdrawn   |
| 504936 | F | Addis Abak Lower Tha     | 0 | 60  | N | Pass        |
| 505123 | F | Addis Abak A Level or I  | 0 | 60  | N | Withdrawn   |
| 505376 | F | South Regi Lower Tha     | 0 | 60  | N | Pass        |
| 505417 | F | Oromia Re A Level or I   | 1 | 120 | Y | Withdrawn   |
| 505499 | M | Oromia Re A Level or I   | 0 | 60  | N | Withdrawn   |
| 505592 | F | North Regi HE Qualific   | 0 | 60  | N | Withdrawn   |
| 505595 | F | Sidamo Re Lower Tha      | 1 | 210 | Y | Withdrawn   |
| 505606 | F | Sidamo Re A Level or I   | 0 | 60  | N | Pass        |
| 505694 | F | Afar Regi Lower Tha      | 0 | 60  | N | Fail        |
| 505871 | F | South Wes A Level or I   | 0 | 60  | N | Fail        |
| 505959 | F | Sidamo Re A Level or I   | 0 | 60  | N | Pass        |
| 505961 | F | Tigrai Regi Lower Tha    | 1 | 120 | N | Distinction |
| 506233 | F | South Wes A Level or I   | 0 | 60  | N | Pass        |
| 506360 | F | South Wes A Level or I   | 0 | 60  | N | Fail        |
| 506650 | F | South Wes A Level or I   | 0 | 150 | N | Withdrawn   |
| 506753 | F | Oromia Re HE Qualific    | 0 | 120 | N | Pass        |
| 507184 | F | Addis Abak A Level or I  | 0 | 60  | N | Withdrawn   |
| 507221 | F | South Regi Lower Tha     | 0 | 120 | N | Withdrawn   |
| 507303 | F | South Regi Lower Tha     | 0 | 60  | N | Withdrawn   |
| 507320 | M | Amhara Re Lower Tha      | 0 | 150 | N | Withdrawn   |
| 507359 | F | Sidamo Re A Level or I   | 1 | 120 | N | Pass        |
| 507485 | F | Sidamo Re Lower Tha      | 0 | 60  | N | Withdrawn   |
| 507685 | F | North Regi A Level or I  | 0 | 120 | N | Withdrawn   |
| 507817 | M | Somalia Re Lower Tha     | 1 | 120 | N | Fail        |
| 508103 | F | South Regi Lower Tha     | 1 | 240 | N | Withdrawn   |
| 508452 | F | Addis Abak HE Qualific   | 0 | 150 | N | Pass        |
| 508537 | F | South Wes A Level or I   | 0 | 60  | N | Pass        |
| 508662 | F | South Regi Lower Tha     | 0 | 60  | N | Pass        |
| 508668 | F | Sidamo Re Lower Tha      | 0 | 60  | N | Fail        |
| 509130 | F | South Regi HE Qualific   | 0 | 60  | N | Withdrawn   |
| 509226 | F | South Regi Lower Tha     | 0 | 120 | N | Pass        |
| 509295 | F | South Wes Lower Tha      | 1 | 180 | N | Withdrawn   |
| 509334 | F | Tigrai Regi A Level or I | 0 | 60  | N | Withdrawn   |
| 509737 | F | Afar Regi Lower Tha      | 1 | 120 | N | Fail        |
| 509768 | F | Oromia Re Lower Tha      | 0 | 60  | N | Distinction |
| 509797 | F | Sidamo Re HE Qualific    | 0 | 60  | N | Fail        |

|        |   |                          |   |     |   |           |
|--------|---|--------------------------|---|-----|---|-----------|
| 509901 | F | Somalia Re A Level or I  | 1 | 120 | Y | Fail      |
| 509926 | F | Addis Abak Lower Tha     | 0 | 60  | N | Fail      |
| 510141 | F | Addis Abak Lower Tha     | 0 | 60  | Y | Withdrawn |
| 510492 | F | South Wes Lower Tha      | 0 | 180 | N | Fail      |
| 510556 | F | Oromia Re Lower Tha      | 0 | 60  | N | Pass      |
| 510756 | F | Sidamo Re A Level or I   | 0 | 60  | N | Pass      |
| 510845 | F | Tigrai Regi Lower Tha    | 0 | 60  | N | Pass      |
| 511050 | M | South Regi Lower Tha     | 0 | 60  | N | Pass      |
| 511067 | F | South Regi A Level or I  | 0 | 60  | N | Pass      |
| 511306 | F | Sidamo Re Lower Tha      | 0 | 60  | N | Pass      |
| 511459 | F | Afar Regio Lower Tha     | 1 | 120 | N | Pass      |
| 511474 | F | Amhara Re Lower Tha      | 2 | 120 | N | Fail      |
| 511515 | F | Afar Regio Lower Tha     | 0 | 120 | N | Fail      |
| 511524 | F | Sidamo Re Lower Tha      | 0 | 60  | N | Pass      |
| 511527 | F | South Regi A Level or I  | 0 | 60  | Y | Fail      |
| 511652 | F | Sidamo Re A Level or I   | 1 | 240 | N | Withdrawn |
| 511693 | F | South Wes A Level or I   | 0 | 60  | N | Pass      |
| 512070 | F | Sidamo Re A Level or I   | 0 | 120 | N | Fail      |
| 512180 | F | Tigrai Regi Lower Tha    | 0 | 120 | Y | Fail      |
| 512242 | F | South Regi Lower Tha     | 0 | 60  | N | Fail      |
| 512468 | F | South Wes Lower Tha      | 1 | 120 | N | Fail      |
| 512805 | F | South Regi Lower Tha     | 1 | 120 | N | Fail      |
| 512883 | F | Tigrai Regi Lower Tha    | 1 | 120 | N | Withdrawn |
| 512911 | F | Sidamo Re Lower Tha      | 0 | 120 | N | Fail      |
| 512924 | F | Addis Abak Lower Tha     | 1 | 240 | N | Withdrawn |
| 512929 | F | Tigrai Regi A Level or I | 0 | 60  | N | Pass      |
| 512995 | F | South Regi A Level or I  | 0 | 60  | N | Pass      |
| 513005 | F | South Wes Lower Tha      | 1 | 180 | N | Fail      |
| 513016 | F | Amhara Re Lower Tha      | 0 | 60  | Y | Withdrawn |
| 513093 | F | Addis Abak A Level or I  | 0 | 120 | N | Pass      |
| 513196 | F | Sidamo Re Lower Tha      | 1 | 180 | N | Withdrawn |
| 513210 | F | Sidamo Re Lower Tha      | 1 | 120 | Y | Withdrawn |
| 513315 | F | Amhara Re Lower Tha      | 0 | 60  | N | Pass      |
| 513368 | F | North Regi A Level or I  | 0 | 60  | N | Withdrawn |
| 513733 | F | Amhara Re A Level or I   | 0 | 60  | N | Fail      |
| 513757 | F | Sidamo Re A Level or I   | 1 | 120 | N | Pass      |
| 513881 | F | Sidamo Re Lower Tha      | 0 | 60  | N | Withdrawn |
| 514140 | M | Tigrai Regi Lower Tha    | 0 | 120 | N | Pass      |
| 514365 | F | Sidamo Re Lower Tha      | 0 | 60  | N | Withdrawn |
| 514819 | F | Somalia Re Lower Tha     | 0 | 120 | N | Withdrawn |
| 514951 | F | South Regi A Level or I  | 0 | 120 | N | Withdrawn |
| 514981 | F | South Regi A Level or I  | 1 | 120 | N | Fail      |
| 514987 | F | South Regi A Level or I  | 1 | 120 | N | Pass      |
| 515035 | F | South Regi Lower Tha     | 0 | 60  | N | Fail      |
| 515105 | F | Sidamo Re Lower Tha      | 0 | 60  | N | Fail      |
| 515130 | F | Tigrai Regi Lower Tha    | 1 | 120 | N | Fail      |
| 515174 | M | Sidamo Re Lower Tha      | 1 | 120 | N | Withdrawn |

|        |   |                          |   |     |   |             |
|--------|---|--------------------------|---|-----|---|-------------|
| 515311 | F | South Regi A Level or l  | 1 | 120 | Y | Pass        |
| 515474 | F | Tigrai Regi A Level or l | 0 | 60  | N | Pass        |
| 515497 | F | Sidamo Re A Level or l   | 0 | 120 | N | Pass        |
| 515959 | F | Sidamo Re A Level or l   | 0 | 60  | N | Pass        |
| 516057 | F | Oromia Re A Level or l   | 0 | 60  | Y | Pass        |
| 516432 | M | Sidamo Re Lower Than     | 1 | 195 | N | Pass        |
| 516456 | F | South Wes A Level or l   | 0 | 150 | N | Pass        |
| 516475 | F | Addis Abak A Level or l  | 0 | 60  | N | Pass        |
| 516495 | F | South Wes Lower Than     | 0 | 120 | N | Fail        |
| 516529 | F | Tigrai Regi HE Qualific  | 0 | 60  | N | Distinction |
| 516776 | F | Addis Abak Lower Than    | 1 | 120 | N | Fail        |
| 516841 | F | Afar Regi Lower Than     | 1 | 120 | N | Pass        |
| 517043 | F | South Regi No Formal     | 1 | 120 | N | Pass        |
| 517175 | M | South Regi Lower Than    | 1 | 120 | N | Fail        |
| 517474 | F | South Wes Lower Than     | 0 | 90  | N | Pass        |
| 517617 | F | Somalia Re A Level or l  | 0 | 120 | N | Pass        |
| 517701 | F | Tigrai Regi Lower Than   | 1 | 120 | N | Withdrawn   |
| 517778 | F | Somalia Re A Level or l  | 0 | 60  | N | Distinction |
| 517853 | F | South Regi Lower Than    | 1 | 120 | N | Fail        |
| 517890 | F | South Wes A Level or l   | 0 | 60  | N | Distinction |
| 518189 | F | Oromia Re Lower Than     | 0 | 120 | N | Pass        |
| 518469 | M | South Wes Lower Than     | 0 | 60  | N | Fail        |
| 518876 | F | Tigrai Regi Lower Than   | 0 | 150 | N | Pass        |
| 518879 | F | Somalia Re Lower Than    | 0 | 60  | Y | Pass        |
| 518904 | F | Oromia Re Lower Than     | 0 | 60  | N | Fail        |
| 518970 | M | Amhara Re A Level or l   | 1 | 120 | N | Pass        |
| 519012 | F | Tigrai Regi Lower Than   | 1 | 120 | N | Fail        |
| 519222 | F | Tigrai Regi A Level or l | 1 | 120 | N | Pass        |
| 519387 | F | Sidamo Re A Level or l   | 0 | 60  | N | Fail        |
| 519602 | F | South Regi Lower Than    | 0 | 60  | Y | Pass        |
| 519647 | F | South Wes Lower Than     | 0 | 60  | N | Withdrawn   |
| 519800 | F | Tigrai Regi Lower Than   | 1 | 120 | N | Pass        |
| 520049 | F | South Regi Lower Than    | 0 | 60  | N | Withdrawn   |
| 520230 | F | South Regi Lower Than    | 0 | 60  | N | Withdrawn   |
| 520749 | M | Addis Abak Lower Than    | 1 | 120 | Y | Withdrawn   |
| 520836 | M | South Wes Lower Than     | 0 | 60  | N | Pass        |
| 521069 | M | South Regi A Level or l  | 0 | 60  | N | Fail        |
| 521081 | F | Sidamo Re Lower Than     | 0 | 90  | Y | Fail        |
| 521096 | F | South Wes Lower Than     | 0 | 120 | N | Pass        |
| 521394 | F | South Wes Lower Than     | 1 | 120 | N | Pass        |
| 521430 | F | Sidamo Re A Level or l   | 0 | 60  | N | Distinction |
| 521496 | M | Tigrai Regi Lower Than   | 1 | 120 | N | Fail        |
| 521764 | F | Sidamo Re A Level or l   | 0 | 60  | N | Pass        |
| 521903 | F | South Wes Lower Than     | 1 | 120 | Y | Fail        |
| 522090 | F | Somalia Re A Level or l  | 0 | 60  | N | Pass        |
| 522249 | F | South Wes Lower Than     | 0 | 60  | N | Pass        |
| 522302 | F | Oromia Re A Level or l   | 0 | 60  | N | Fail        |



|        |   |                          |   |     |   |             |
|--------|---|--------------------------|---|-----|---|-------------|
| 522373 | F | Amhara Re A Level or l   | 0 | 120 | N | Pass        |
| 522383 | F | Tigrai Regi Lower Tha    | 1 | 120 | Y | Fail        |
| 522512 | F | Tigrai Regi Lower Tha    | 1 | 120 | N | Fail        |
| 523012 | F | Afar Regio A Level or l  | 0 | 120 | N | Pass        |
| 523156 | F | North Regi A Level or l  | 0 | 60  | N | Withdrawn   |
| 523596 | F | Addis Abak A Level or l  | 0 | 75  | N | Fail        |
| 523630 | F | South Regi Lower Tha     | 0 | 120 | N | Pass        |
| 523672 | M | Tigrai Regi Lower Tha    | 0 | 90  | N | Pass        |
| 523789 | F | Sidamo Re A Level or l   | 1 | 240 | N | Withdrawn   |
| 523966 | F | Tigrai Regi A Level or l | 0 | 150 | N | Pass        |
| 524101 | F | North Regi Lower Tha     | 1 | 120 | N | Withdrawn   |
| 524171 | F | Amhara Re A Level or l   | 0 | 120 | N | Fail        |
| 524452 | F | South Wes A Level or l   | 0 | 60  | N | Pass        |
| 524496 | F | South Regi A Level or l  | 0 | 60  | N | Withdrawn   |
| 524598 | M | Tigrai Regi Lower Tha    | 0 | 60  | N | Fail        |
| 524769 | F | South Wes Lower Tha      | 1 | 150 | Y | Withdrawn   |
| 524968 | F | South Regi Lower Tha     | 0 | 60  | N | Withdrawn   |
| 525501 | F | Addis Abak Lower Tha     | 0 | 60  | Y | Pass        |
| 525520 | F | North Regi Lower Tha     | 0 | 60  | N | Fail        |
| 525543 | F | Somalia Re Lower Tha     | 0 | 120 | N | Withdrawn   |
| 525679 | F | Sidamo Re Lower Tha      | 0 | 120 | N | Fail        |
| 525683 | F | Amhara Re Lower Tha      | 0 | 75  | N | Pass        |
| 525797 | F | Somalia Re Lower Tha     | 1 | 120 | N | Fail        |
| 525869 | F | South Regi A Level or l  | 0 | 60  | N | Fail        |
| 525942 | M | Afar Regio Lower Tha     | 0 | 60  | Y | Withdrawn   |
| 526200 | F | South Wes Lower Tha      | 1 | 240 | N | Fail        |
| 526370 | F | Amhara Re Lower Tha      | 0 | 60  | N | Pass        |
| 526506 | F | Sidamo Re A Level or l   | 1 | 240 | N | Withdrawn   |
| 527020 | F | South Regi Lower Tha     | 0 | 120 | Y | Pass        |
| 527164 | F | Oromia Re A Level or l   | 0 | 120 | N | Distinction |
| 527227 | F | Sidamo Re Lower Tha      | 1 | 120 | N | Pass        |
| 527313 | F | Amhara Re A Level or l   | 0 | 120 | N | Fail        |
| 527343 | F | Tigrai Regi A Level or l | 1 | 120 | N | Withdrawn   |
| 527382 | F | Tigrai Regi Lower Tha    | 0 | 60  | Y | Withdrawn   |
| 527400 | F | Addis Abak Lower Tha     | 0 | 60  | N | Fail        |
| 527659 | F | Tigrai Regi Lower Tha    | 0 | 60  | N | Fail        |
| 527886 | F | Amhara Re Lower Tha      | 1 | 120 | N | Pass        |
| 527980 | F | South Regi Lower Tha     | 0 | 60  | N | Distinction |
| 528161 | F | Tigrai Regi A Level or l | 0 | 60  | N | Pass        |
| 528175 | F | South Regi Lower Tha     | 0 | 150 | Y | Withdrawn   |
| 528220 | F | Somalia Re A Level or l  | 1 | 180 | N | Withdrawn   |
| 528250 | F | Tigrai Regi A Level or l | 0 | 60  | N | Pass        |
| 528261 | F | Somalia Re A Level or l  | 1 | 120 | N | Distinction |
| 528270 | F | South Wes Lower Tha      | 0 | 180 | N | Withdrawn   |
| 528353 | F | Addis Abak A Level or l  | 0 | 60  | N | Pass        |
| 528649 | M | Sidamo Re A Level or l   | 0 | 60  | N | Fail        |
| 528698 | F | Oromia Re Lower Tha      | 0 | 120 | N | Pass        |

|        |   |             |              |   |     |   |           |
|--------|---|-------------|--------------|---|-----|---|-----------|
| 528904 | F | Afar Region | A Level or I | 0 | 60  | N | Pass      |
| 528918 | F | Somalia Re  | Lower Than   | 1 | 120 | N | Withdrawn |
| 529065 | F | North Regi  | Lower Than   | 0 | 60  | N | Pass      |
| 529118 | F | Somalia Re  | A Level or I | 1 | 120 | Y | Withdrawn |
| 529174 | F | Tigray Regi | Lower Than   | 1 | 120 | N | Fail      |
| 529212 | F | South Regi  | Lower Than   | 1 | 180 | N | Pass      |
| 529383 | F | Afar Region | HE Qualific  | 1 | 150 | N | Fail      |
| 529446 | F | Amhara Re   | Lower Than   | 0 | 60  | N | Pass      |
| 529452 | F | Tigray Regi | A Level or I | 0 | 75  | N | Fail      |
| 529502 | F | Tigray Regi | HE Qualific  | 0 | 60  | N | Pass      |
| 529767 | F | South Regi  | Lower Than   | 1 | 120 | N | Withdrawn |
| 530065 | F | Sidamo Re,  | A Level or I | 0 | 180 | N | Pass      |
| 530153 | F | Afar Region | HE Qualific  | 0 | 60  | N | Fail      |
| 530215 | F | South Regi  | A Level or I | 1 | 120 | N | Withdrawn |
| 530226 | F | Amhara Re   | A Level or I | 1 | 120 | Y | Pass      |
| 530245 | F | South Regi  | A Level or I | 1 | 120 | N | Withdrawn |
| 530266 | F | Tigray Regi | A Level or I | 0 | 60  | N | Fail      |
| 530398 | F | Addis Abak  | Lower Than   | 1 | 120 | N | Withdrawn |
| 530483 | F | Somalia Re  | A Level or I | 0 | 60  | N | Withdrawn |
| 530493 | F | Sidamo Re,  | Lower Than   | 1 | 180 | N | Fail      |
| 530669 | F | Sidamo Re,  | A Level or I | 0 | 60  | N | Pass      |
| 530987 | F | Amhara Re   | A Level or I | 0 | 60  | N | Pass      |
| 531000 | F | Sidamo Re,  | Lower Than   | 0 | 60  | N | Withdrawn |
| 531027 | F | Tigray Regi | Lower Than   | 0 | 60  | N | Fail      |
| 531205 | F | South Wes   | Lower Than   | 0 | 60  | N | Withdrawn |
| 531235 | F | Sidamo Re,  | A Level or I | 0 | 60  | N | Withdrawn |
| 531427 | F | Somalia Re  | A Level or I | 0 | 120 | N | Fail      |
| 531428 | F | Somalia Re  | A Level or I | 1 | 120 | N | Withdrawn |
| 531464 | F | Addis Abak  | Lower Than   | 0 | 60  | N | Fail      |
| 531481 | F | Sidamo Re,  | A Level or I | 1 | 180 | N | Withdrawn |
| 531569 | F | South Regi  | A Level or I | 1 | 120 | N | Fail      |
| 531573 | F | Tigray Regi | Lower Than   | 1 | 120 | Y | Fail      |
| 531634 | F | North Regi  | HE Qualific  | 0 | 120 | N | Fail      |
| 531689 | F | Sidamo Re,  | HE Qualific  | 0 | 60  | N | Withdrawn |
| 532000 | F | Addis Abak  | Lower Than   | 1 | 120 | N | Withdrawn |
| 532034 | F | Afar Region | Lower Than   | 0 | 60  | N | Fail      |
| 532140 | F | South Regi  | A Level or I | 1 | 270 | N | Pass      |
| 532142 | F | Sidamo Re,  | Lower Than   | 1 | 120 | N | Withdrawn |
| 532317 | F | Sidamo Re,  | Lower Than   | 0 | 60  | N | Fail      |
| 532396 | F | South Regi  | HE Qualific  | 0 | 60  | N | Withdrawn |
| 532500 | F | South Regi  | A Level or I | 0 | 60  | N | Fail      |
| 532512 | F | South Regi  | A Level or I | 0 | 60  | N | Withdrawn |
| 532534 | M | North Regi  | Lower Than   | 0 | 60  | Y | Fail      |
| 532584 | F | South Regi  | Lower Than   | 0 | 60  | N | Fail      |
| 532665 | F | South Regi  | A Level or I | 0 | 60  | N | Pass      |
| 532668 | F | Sidamo Re,  | Lower Than   | 0 | 60  | N | Fail      |
| 532710 | F | South Regi  | Lower Than   | 0 | 120 | Y | Fail      |

|        |   |                          |   |     |   |             |
|--------|---|--------------------------|---|-----|---|-------------|
| 532742 | F | Amhara Re Lower Tha      | 0 | 60  | N | Withdrawn   |
| 532839 | F | North Regi HE Qualific   | 0 | 60  | N | Withdrawn   |
| 532886 | F | Addis Abak A Level or I  | 0 | 60  | N | Pass        |
| 532928 | F | Sidamo Re A Level or I   | 0 | 60  | N | Withdrawn   |
| 532950 | F | South Wes Lower Tha      | 0 | 60  | N | Pass        |
| 533324 | F | South Wes Lower Tha      | 0 | 120 | Y | Pass        |
| 533347 | F | Tigrai Regi Lower Tha    | 0 | 60  | N | Pass        |
| 533365 | F | Sidamo Re A Level or I   | 0 | 60  | N | Fail        |
| 533512 | F | Addis Abak Lower Tha     | 0 | 120 | N | Withdrawn   |
| 533545 | F | Sidamo Re A Level or I   | 0 | 60  | Y | Pass        |
| 533697 | F | Addis Abak A Level or I  | 0 | 60  | N | Withdrawn   |
| 533722 | F | South Regi Lower Tha     | 0 | 120 | N | Distinction |
| 533737 | F | Somalia Re A Level or I  | 0 | 60  | N | Withdrawn   |
| 533839 | F | South Regi A Level or I  | 0 | 60  | N | Pass        |
| 533846 | F | Somalia Re A Level or I  | 0 | 120 | N | Fail        |
| 533969 | F | Amhara Re Lower Tha      | 0 | 60  | N | Fail        |
| 533996 | F | South Regi Lower Tha     | 0 | 60  | N | Withdrawn   |
| 534051 | F | Tigrai Regi A Level or I | 0 | 60  | N | Fail        |
| 534086 | F | South Regi A Level or I  | 0 | 60  | N | Fail        |
| 534151 | F | North Regi Lower Tha     | 0 | 120 | N | Withdrawn   |
| 534217 | F | South Wes Lower Tha      | 0 | 60  | N | Withdrawn   |
| 534343 | M | North Regi A Level or I  | 0 | 60  | N | Distinction |
| 534360 | M | South Regi A Level or I  | 0 | 60  | Y | Pass        |
| 534373 | F | South Regi A Level or I  | 0 | 60  | N | Pass        |
| 534426 | F | Amhara Re A Level or I   | 0 | 60  | N | Withdrawn   |
| 534432 | F | Tigrai Regi A Level or I | 0 | 120 | N | Pass        |
| 534530 | F | South Regi Lower Tha     | 0 | 60  | N | Fail        |
| 534652 | F | South Regi A Level or I  | 0 | 60  | N | Distinction |
| 534671 | F | South Regi A Level or I  | 0 | 60  | Y | Withdrawn   |
| 534698 | F | Somalia Re A Level or I  | 0 | 60  | N | Pass        |
| 534709 | F | Afar Regioi A Level or I | 0 | 60  | N | Pass        |
| 534713 | F | Afar Regioi HE Qualific  | 0 | 120 | N | Withdrawn   |
| 534744 | F | Amhara Re Lower Tha      | 0 | 60  | N | Fail        |
| 534758 | F | South Regi Lower Tha     | 0 | 90  | N | Withdrawn   |
| 534765 | F | Somalia Re Lower Tha     | 0 | 120 | Y | Pass        |
| 534830 | F | South Regi Lower Tha     | 0 | 120 | N | Withdrawn   |
| 534908 | F | North Regi A Level or I  | 0 | 120 | N | Fail        |
| 534922 | F | Amhara Re A Level or I   | 0 | 60  | N | Withdrawn   |
| 534983 | F | South Regi A Level or I  | 0 | 120 | N | Pass        |
| 534991 | F | Addis Abak Lower Tha     | 0 | 60  | N | Pass        |
| 535012 | F | Tigrai Regi Lower Tha    | 0 | 120 | N | Fail        |
| 535140 | F | South Regi A Level or I  | 0 | 150 | N | Pass        |
| 535145 | F | Afar Regioi Lower Tha    | 0 | 60  | N | Fail        |
| 535152 | F | Somalia Re Lower Tha     | 0 | 60  | N | Withdrawn   |
| 535155 | F | Somalia Re Lower Tha     | 0 | 60  | N | Withdrawn   |
| 535269 | F | Sidamo Re A Level or I   | 0 | 60  | N | Withdrawn   |
| 535272 | F | Oromia Re Lower Tha      | 0 | 120 | N | Withdrawn   |

|        |   |                           |   |     |   |             |
|--------|---|---------------------------|---|-----|---|-------------|
| 535278 | F | Afar Region Lower Than    | 0 | 60  | N | Fail        |
| 535303 | F | Sidamo Region No Formal   | 0 | 60  | N | Withdrawn   |
| 535328 | F | Oromia Region Lower Than  | 0 | 60  | N | Pass        |
| 535396 | F | South West Lower Than     | 0 | 60  | N | Withdrawn   |
| 535407 | F | Addis Ababa Lower Than    | 0 | 60  | N | Pass        |
| 535468 | F | Addis Ababa A Level or    | 0 | 60  | N | Pass        |
| 535526 | F | North Region Lower Than   | 0 | 120 | N | Withdrawn   |
| 535530 | F | Addis Ababa A Level or    | 0 | 60  | Y | Pass        |
| 535558 | F | South Region HE Qualific  | 0 | 120 | N | Withdrawn   |
| 535605 | F | Somalia Region Lower Than | 0 | 60  | N | Distinction |
| 535618 | M | North Region Lower Than   | 0 | 120 | N | Fail        |
| 535755 | F | Amhara Region HE Qualific | 0 | 60  | N | Pass        |
| 535760 | F | Addis Ababa A Level or    | 0 | 60  | N | Pass        |
| 535773 | F | Addis Ababa A Level or    | 0 | 60  | N | Pass        |
| 535778 | F | Addis Ababa A Level or    | 0 | 120 | N | Fail        |
| 535800 | F | Tigray Region A Level or  | 0 | 120 | N | Pass        |
| 535807 | F | Sidamo Region Lower Than  | 0 | 120 | N | Fail        |
| 535820 | F | South West A Level or     | 0 | 120 | N | Pass        |
| 536050 | F | Amhara Region Lower Than  | 0 | 60  | N | Fail        |
| 536112 | F | Sidamo Region A Level or  | 0 | 120 | N | Pass        |
| 536188 | F | Sidamo Region Lower Than  | 0 | 120 | N | Fail        |
| 536189 | F | Sidamo Region A Level or  | 0 | 120 | N | Pass        |
| 536203 | F | South Region Lower Than   | 0 | 60  | N | Withdrawn   |
| 536205 | F | South Region Lower Than   | 0 | 60  | Y | Pass        |
| 536216 | F | South West Lower Than     | 0 | 60  | N | Fail        |
| 536243 | F | Somalia Region Lower Than | 0 | 60  | N | Fail        |
| 536270 | F | Afar Region Lower Than    | 0 | 60  | N | Withdrawn   |
| 536442 | F | Amhara Region Lower Than  | 0 | 60  | N | Withdrawn   |
| 536452 | F | Tigray Region A Level or  | 0 | 60  | N | Pass        |
| 536471 | F | Addis Ababa A Level or    | 0 | 60  | N | Withdrawn   |
| 536510 | F | South Region Lower Than   | 0 | 60  | Y | Withdrawn   |
| 536519 | F | Sidamo Region Lower Than  | 0 | 60  | N | Withdrawn   |
| 536520 | F | Sidamo Region Lower Than  | 0 | 60  | N | Withdrawn   |
| 536551 | F | Tigray Region A Level or  | 0 | 75  | N | Fail        |
| 536670 | F | Tigray Region A Level or  | 0 | 60  | N | Withdrawn   |
| 536722 | F | South Region A Level or   | 0 | 60  | N | Fail        |
| 536726 | F | Afar Region HE Qualific   | 0 | 60  | N | Fail        |
| 536856 | F | Tigray Region Lower Than  | 0 | 60  | N | Fail        |
| 536900 | F | South Region A Level or   | 0 | 60  | N | Pass        |
| 537162 | F | Tigray Region Lower Than  | 0 | 120 | N | Pass        |
| 537193 | F | Sidamo Region A Level or  | 0 | 120 | N | Pass        |
| 537255 | F | North Region Lower Than   | 0 | 60  | N | Pass        |
| 537259 | M | Sidamo Region A Level or  | 0 | 120 | N | Fail        |
| 537263 | F | Somalia Region A Level or | 0 | 120 | N | Withdrawn   |
| 537320 | F | Sidamo Region Lower Than  | 0 | 90  | N | Withdrawn   |
| 537342 | F | South Region HE Qualific  | 0 | 120 | N | Distinction |
| 537392 | F | South Region Lower Than   | 0 | 60  | N | Withdrawn   |

|        |   |                          |   |     |   |             |
|--------|---|--------------------------|---|-----|---|-------------|
| 537414 | F | South Wes A Level or I   | 0 | 120 | N | Pass        |
| 537433 | F | South Regi HE Qualific   | 0 | 60  | N | Fail        |
| 537434 | F | South Wes A Level or I   | 0 | 180 | N | Pass        |
| 537464 | F | Oromia Re A Level or I   | 0 | 60  | N | Pass        |
| 537473 | F | South Regi A Level or I  | 0 | 60  | N | Pass        |
| 537488 | F | South Wes A Level or I   | 0 | 60  | N | Pass        |
| 537558 | F | South Regi HE Qualific   | 0 | 120 | N | Distinction |
| 537572 | F | South Wes Lower Thar     | 0 | 60  | N | Pass        |
| 537584 | F | South Wes Lower Thar     | 0 | 60  | N | Fail        |
| 537676 | F | Somalia Re Lower Thar    | 0 | 60  | N | Fail        |
| 537679 | F | Sidamo Re Lower Thar     | 0 | 120 | N | Pass        |
| 537688 | F | Amhara Re Lower Thar     | 0 | 60  | N | Pass        |
| 537704 | F | South Regi Lower Thar    | 0 | 60  | N | Pass        |
| 537844 | F | Amhara Re Lower Thar     | 0 | 120 | N | Fail        |
| 537875 | F | Addis Abak A Level or I  | 0 | 60  | N | Pass        |
| 537898 | F | Addis Abak Lower Thar    | 0 | 60  | N | Pass        |
| 537905 | F | Addis Abak A Level or I  | 0 | 60  | N | Distinction |
| 538138 | F | North Regi A Level or I  | 0 | 120 | N | Withdrawn   |
| 538196 | M | South Regi A Level or I  | 0 | 60  | N | Withdrawn   |
| 538221 | F | South Wes A Level or I   | 0 | 60  | N | Pass        |
| 538232 | F | Somalia Re Lower Thar    | 0 | 120 | N | Withdrawn   |
| 538897 | F | Sidamo Re A Level or I   | 0 | 120 | N | Distinction |
| 538942 | F | Sidamo Re Lower Thar     | 0 | 60  | N | Fail        |
| 538987 | F | Sidamo Re HE Qualific    | 0 | 60  | N | Distinction |
| 539041 | F | Tigrai Regi A Level or I | 1 | 120 | N | Withdrawn   |
| 539056 | F | Amhara Re HE Qualific    | 0 | 60  | N | Pass        |
| 539232 | F | Oromia Re A Level or I   | 0 | 120 | N | Withdrawn   |
| 539253 | F | Tigrai Regi Lower Thar   | 0 | 60  | N | Fail        |
| 539265 | F | Addis Abak Lower Thar    | 0 | 60  | N | Pass        |
| 539303 | F | Sidamo Re Lower Thar     | 0 | 60  | N | Pass        |
| 539345 | F | Afar Regi HE Qualific    | 0 | 60  | N | Pass        |
| 539365 | F | Sidamo Re Lower Thar     | 0 | 60  | N | Pass        |
| 539385 | F | South Wes A Level or I   | 0 | 60  | N | Pass        |
| 539416 | M | South Regi Lower Thar    | 0 | 60  | N | Fail        |
| 539418 | F | South Regi A Level or I  | 0 | 120 | N | Distinction |
| 539426 | F | Sidamo Re No Formal      | 0 | 60  | N | Withdrawn   |
| 539558 | F | South Wes A Level or I   | 0 | 60  | N | Fail        |
| 539572 | F | Sidamo Re Lower Thar     | 0 | 60  | N | Pass        |
| 539710 | F | South Regi Lower Thar    | 0 | 60  | N | Fail        |
| 539737 | F | South Wes A Level or I   | 0 | 60  | N | Pass        |
| 539891 | F | Tigrai Regi Lower Thar   | 0 | 120 | N | Withdrawn   |
| 539962 | F | Addis Abak Lower Thar    | 0 | 60  | N | Fail        |
| 540055 | F | Sidamo Re Lower Thar     | 0 | 60  | N | Distinction |
| 540122 | M | Sidamo Re A Level or I   | 0 | 60  | N | Withdrawn   |
| 540184 | F | South Regi Lower Thar    | 0 | 60  | N | Pass        |
| 540511 | F | South Wes HE Qualific    | 0 | 60  | N | Distinction |
| 540513 | F | Amhara Re A Level or I   | 0 | 75  | N | Pass        |

|        |   |                          |   |     |   |             |
|--------|---|--------------------------|---|-----|---|-------------|
| 540530 | F | Amhara Re Lower Tha      | 0 | 120 | N | Fail        |
| 540568 | M | North Regi A Level or I  | 0 | 120 | N | Withdrawn   |
| 540594 | F | South Regi A Level or I  | 0 | 60  | N | Withdrawn   |
| 540607 | F | Addis Abak Lower Tha     | 0 | 60  | N | Pass        |
| 540614 | F | Addis Abak A Level or I  | 0 | 120 | N | Pass        |
| 540656 | F | South Regi A Level or I  | 0 | 120 | N | Pass        |
| 540750 | F | Tigrai Regi Lower Tha    | 0 | 60  | N | Pass        |
| 540767 | F | Somalia Re Lower Tha     | 0 | 60  | N | Withdrawn   |
| 540780 | F | Addis Abak A Level or I  | 0 | 60  | N | Distinction |
| 540787 | F | South Regi A Level or I  | 0 | 120 | N | Withdrawn   |
| 540826 | F | Somalia Re A Level or I  | 0 | 60  | N | Fail        |
| 540918 | F | Sidamo Re A Level or I   | 0 | 60  | N | Withdrawn   |
| 540953 | F | South Regi Lower Tha     | 0 | 120 | N | Withdrawn   |
| 541013 | F | Afar Regioi HE Qualific  | 0 | 60  | Y | Pass        |
| 541048 | F | South Regi Lower Tha     | 0 | 60  | N | Fail        |
| 541061 | F | South Regi Lower Tha     | 0 | 60  | N | Withdrawn   |
| 541073 | F | Addis Abak Lower Tha     | 0 | 60  | Y | Pass        |
| 541113 | F | South Wes Lower Tha      | 0 | 60  | N | Pass        |
| 541196 | F | Addis Abak Lower Tha     | 0 | 60  | Y | Withdrawn   |
| 541231 | F | South Regi Lower Tha     | 0 | 90  | N | Fail        |
| 541232 | F | Somalia Re Lower Tha     | 0 | 60  | N | Pass        |
| 541363 | F | Afar Regioi A Level or I | 0 | 60  | N | Pass        |
| 541523 | F | Oromia Re Lower Tha      | 0 | 60  | N | Pass        |
| 541573 | F | South Regi A Level or I  | 0 | 60  | N | Withdrawn   |
| 541697 | F | Amhara Re No Formal      | 0 | 60  | N | Pass        |
| 541706 | F | Tigrai Regi A Level or I | 0 | 120 | N | Fail        |
| 541709 | F | Sidamo Re Lower Tha      | 0 | 120 | N | Withdrawn   |
| 541727 | F | Oromia Re A Level or I   | 0 | 60  | N | Withdrawn   |
| 541763 | F | South Wes A Level or I   | 0 | 60  | N | Fail        |
| 541764 | F | North Regi A Level or I  | 0 | 60  | N | Pass        |
| 541794 | F | Amhara Re A Level or I   | 0 | 60  | N | Pass        |
| 541803 | M | Tigrai Regi HE Qualific  | 0 | 60  | N | Fail        |
| 541808 | F | Addis Abak A Level or I  | 0 | 60  | N | Pass        |
| 541822 | F | Sidamo Re A Level or I   | 0 | 120 | N | Distinction |
| 541832 | F | Addis Abak A Level or I  | 0 | 60  | N | Fail        |
| 541838 | M | South Regi Lower Tha     | 0 | 60  | N | Withdrawn   |
| 541884 | F | Afar Regioi Lower Tha    | 0 | 60  | N | Fail        |
| 541973 | F | South Regi Lower Tha     | 0 | 60  | N | Fail        |
| 541985 | F | South Regi A Level or I  | 0 | 60  | N | Withdrawn   |
| 542010 | M | Tigrai Regi A Level or I | 0 | 120 | N | Withdrawn   |
| 542012 | F | Somalia Re Lower Tha     | 0 | 60  | N | Fail        |
| 542081 | F | Amhara Re Lower Tha      | 0 | 120 | N | Withdrawn   |
| 542084 | F | Tigrai Regi Lower Tha    | 0 | 60  | N | Pass        |
| 542115 | F | Sidamo Re Lower Tha      | 0 | 60  | N | Fail        |
| 542172 | F | Sidamo Re A Level or I   | 0 | 60  | N | Withdrawn   |
| 542259 | F | Afar Regioi Lower Tha    | 0 | 60  | Y | Withdrawn   |
| 542260 | F | Tigrai Regi Lower Tha    | 0 | 60  | Y | Fail        |

|        |   |                          |   |     |   |             |
|--------|---|--------------------------|---|-----|---|-------------|
| 542291 | F | Oromia Re HE Qualific    | 0 | 60  | N | Pass        |
| 542396 | F | South Regi Lower Tha     | 0 | 60  | N | Withdrawn   |
| 542543 | F | Addis Abak A Level or I  | 0 | 60  | N | Fail        |
| 542562 | F | Oromia Re A Level or I   | 0 | 150 | Y | Withdrawn   |
| 542602 | F | Amhara Re Lower Tha      | 0 | 120 | N | Withdrawn   |
| 542613 | F | South Wes Lower Tha      | 0 | 60  | N | Pass        |
| 542622 | F | Amhara Re Lower Tha      | 0 | 60  | N | Fail        |
| 542663 | F | North Regi Lower Tha     | 0 | 60  | N | Fail        |
| 542687 | F | Amhara Re Lower Tha      | 0 | 60  | N | Fail        |
| 542692 | F | South Regi Lower Tha     | 0 | 60  | N | Fail        |
| 542745 | F | Addis Abak HE Qualific   | 0 | 60  | N | Fail        |
| 542748 | F | Oromia Re Lower Tha      | 0 | 60  | N | Distinction |
| 542760 | F | Addis Abak A Level or I  | 0 | 60  | N | Withdrawn   |
| 542991 | F | Tigrai Regi A Level or I | 0 | 60  | N | Fail        |
| 543124 | F | Tigrai Regi A Level or I | 0 | 60  | Y | Pass        |
| 543140 | F | South Wes Lower Tha      | 0 | 60  | N | Fail        |
| 543165 | M | Sidamo Re A Level or I   | 0 | 120 | Y | Pass        |
| 543180 | F | Tigrai Regi Lower Tha    | 0 | 60  | Y | Pass        |
| 543199 | F | South Regi A Level or I  | 0 | 60  | N | Withdrawn   |
| 543351 | F | Sidamo Re No Formal      | 0 | 60  | N | Pass        |
| 543356 | F | South Wes Lower Tha      | 0 | 120 | N | Pass        |
| 543365 | F | South Regi A Level or I  | 0 | 60  | N | Withdrawn   |
| 543408 | F | Somalia Re Lower Tha     | 0 | 120 | N | Withdrawn   |
| 543465 | F | North Regi Lower Tha     | 0 | 60  | N | Fail        |
| 543473 | F | Oromia Re Lower Tha      | 0 | 90  | N | Pass        |
| 543533 | F | Oromia Re Lower Tha      | 0 | 60  | N | Withdrawn   |
| 543630 | F | North Regi A Level or I  | 0 | 60  | N | Fail        |
| 543719 | F | South Regi A Level or I  | 0 | 60  | N | Pass        |
| 543853 | F | South Regi Lower Tha     | 0 | 120 | N | Pass        |
| 543864 | F | Afar Regi Lower Tha      | 0 | 60  | N | Fail        |
| 543896 | F | Oromia Re A Level or I   | 0 | 60  | N | Withdrawn   |
| 543926 | F | Sidamo Re Lower Tha      | 0 | 180 | N | Withdrawn   |
| 543970 | F | Afar Regi Lower Tha      | 0 | 60  | N | Fail        |
| 544017 | F | South Wes A Level or I   | 0 | 60  | N | Fail        |
| 544186 | M | South Regi Lower Tha     | 0 | 60  | N | Distinction |
| 544351 | F | North Regi Lower Tha     | 0 | 120 | N | Fail        |
| 544408 | F | Somalia Re A Level or I  | 0 | 60  | N | Fail        |
| 544435 | F | South Regi A Level or I  | 0 | 60  | N | Withdrawn   |
| 544444 | F | Tigrai Regi Lower Tha    | 0 | 60  | N | Withdrawn   |
| 544455 | F | Amhara Re Lower Tha      | 0 | 60  | N | Pass        |
| 544491 | F | South Regi Lower Tha     | 0 | 60  | N | Withdrawn   |
| 544500 | F | Tigrai Regi HE Qualific  | 0 | 60  | N | Fail        |
| 544519 | F | North Regi Lower Tha     | 0 | 60  | N | Fail        |
| 544532 | F | South Regi Lower Tha     | 0 | 60  | N | Pass        |
| 544627 | F | Addis Abak Lower Tha     | 0 | 60  | N | Withdrawn   |
| 544632 | F | Addis Abak A Level or I  | 0 | 120 | Y | Pass        |
| 544639 | F | Sidamo Re Lower Tha      | 0 | 60  | N | Fail        |

|        |   |                          |   |     |   |             |
|--------|---|--------------------------|---|-----|---|-------------|
| 544642 | F | Addis Abat A Level or I  | 0 | 60  | N | Pass        |
| 544686 | F | Sidamo Re Lower Than     | 0 | 60  | N | Withdrawn   |
| 544741 | F | South Regi A Level or I  | 0 | 60  | N | Pass        |
| 544796 | F | South Regi Lower Than    | 0 | 60  | N | Withdrawn   |
| 544848 | F | Oromia Re Lower Than     | 0 | 60  | N | Pass        |
| 544859 | F | Amhara Re A Level or I   | 0 | 60  | N | Fail        |
| 544881 | F | South Regi A Level or I  | 0 | 120 | N | Pass        |
| 544890 | F | South Regi A Level or I  | 0 | 60  | N | Pass        |
| 544978 | F | Amhara Re A Level or I   | 0 | 60  | N | Fail        |
| 544989 | M | South Regi A Level or I  | 0 | 60  | N | Fail        |
| 545001 | F | South Regi A Level or I  | 0 | 60  | N | Withdrawn   |
| 545041 | M | Addis Abat A Level or I  | 0 | 60  | N | Fail        |
| 545072 | F | Addis Abat Lower Than    | 0 | 60  | N | Fail        |
| 545191 | F | Addis Abat HE Qualific   | 0 | 60  | N | Pass        |
| 545219 | F | North Regi Lower Than    | 0 | 120 | N | Withdrawn   |
| 545223 | F | Somalia Re Lower Than    | 0 | 60  | N | Withdrawn   |
| 545240 | F | Afar Regio A Level or I  | 0 | 60  | N | Fail        |
| 545337 | M | South Wes A Level or I   | 0 | 90  | N | Withdrawn   |
| 545340 | F | Sidamo Re Lower Than     | 0 | 60  | N | Fail        |
| 545376 | M | Oromia Re Lower Than     | 0 | 90  | N | Withdrawn   |
| 545381 | F | South Regi Lower Than    | 0 | 60  | N | Fail        |
| 545392 | F | Sidamo Re A Level or I   | 0 | 60  | N | Pass        |
| 545480 | F | Sidamo Re A Level or I   | 0 | 60  | N | Withdrawn   |
| 545514 | F | Sidamo Re Lower Than     | 0 | 60  | N | Withdrawn   |
| 545521 | M | South Regi Lower Than    | 0 | 60  | Y | Withdrawn   |
| 545658 | F | Tigrai Regi HE Qualific  | 0 | 60  | N | Pass        |
| 545697 | F | South Wes Lower Than     | 0 | 60  | Y | Pass        |
| 545702 | F | Addis Abat Lower Than    | 0 | 60  | N | Pass        |
| 545725 | F | Afar Regio HE Qualific   | 0 | 60  | N | Withdrawn   |
| 545780 | M | Afar Regio Lower Than    | 0 | 60  | N | Fail        |
| 545799 | F | Sidamo Re A Level or I   | 0 | 60  | N | Withdrawn   |
| 545803 | F | South Wes HE Qualific    | 0 | 120 | N | Fail        |
| 545896 | F | Amhara Re A Level or I   | 0 | 120 | N | Withdrawn   |
| 545927 | M | Oromia Re Lower Than     | 0 | 120 | N | Withdrawn   |
| 546015 | F | South Regi Lower Than    | 0 | 60  | N | Withdrawn   |
| 546019 | F | Tigrai Regi Lower Than   | 0 | 60  | N | Fail        |
| 546052 | F | South Regi Lower Than    | 0 | 120 | N | Distinction |
| 546136 | F | Sidamo Re No Formal      | 0 | 60  | N | Withdrawn   |
| 546157 | F | Tigrai Regi A Level or I | 0 | 60  | N | Pass        |
| 546202 | F | South Regi Lower Than    | 0 | 60  | N | Fail        |
| 546322 | F | Addis Abat Lower Than    | 0 | 60  | N | Pass        |
| 546333 | F | Addis Abat Lower Than    | 0 | 60  | Y | Withdrawn   |
| 546407 | F | Afar Regio Lower Than    | 0 | 60  | N | Pass        |
| 546428 | F | Oromia Re Lower Than     | 0 | 60  | N | Pass        |
| 546455 | M | Tigrai Regi A Level or I | 0 | 60  | N | Fail        |
| 546500 | F | Amhara Re A Level or I   | 0 | 60  | N | Fail        |
| 546533 | F | Afar Regio Lower Than    | 0 | 60  | N | Fail        |



|        |   |                            |   |     |   |             |
|--------|---|----------------------------|---|-----|---|-------------|
| 546609 | F | Afar Region HE Qualific    | 0 | 60  | N | Pass        |
| 546632 | F | Somalia Re A Level or I    | 0 | 60  | N | Pass        |
| 546681 | F | Amhara Re Lower Than       | 0 | 60  | N | Fail        |
| 546685 | F | Tigray Region A Level or I | 0 | 60  | N | Pass        |
| 546749 | F | Somalia Re A Level or I    | 0 | 60  | N | Distinction |
| 546786 | F | Addis Abat Lower Than      | 0 | 60  | N | Withdrawn   |
| 546811 | F | Addis Abat Lower Than      | 0 | 120 | N | Pass        |
| 546837 | F | Sidamo Re A Level or I     | 0 | 60  | N | Pass        |
| 546843 | F | Sidamo Re A Level or I     | 0 | 60  | N | Fail        |
| 546892 | F | South Regi A Level or I    | 0 | 60  | N | Withdrawn   |
| 546909 | F | Sidamo Re Lower Than       | 0 | 60  | Y | Fail        |
| 546921 | M | Tigray Region HE Qualific  | 0 | 180 | N | Pass        |
| 546941 | F | South Regi A Level or I    | 0 | 120 | N | Withdrawn   |
| 546947 | F | Sidamo Re HE Qualific      | 0 | 60  | N | Withdrawn   |
| 546958 | F | South Regi A Level or I    | 0 | 60  | N | Fail        |
| 547052 | F | Sidamo Re A Level or I     | 0 | 150 | N | Withdrawn   |
| 547165 | F | South Wes A Level or I     | 0 | 60  | N | Fail        |
| 547192 | F | South Regi A Level or I    | 0 | 60  | N | Pass        |
| 547259 | F | Addis Abat Lower Than      | 0 | 60  | N | Distinction |
| 547267 | M | Amhara Re Lower Than       | 0 | 120 | N | Withdrawn   |
| 547303 | F | Amhara Re Lower Than       | 0 | 60  | N | Withdrawn   |
| 547372 | F | Tigray Region Lower Than   | 0 | 60  | N | Fail        |
| 547390 | F | Sidamo Re Lower Than       | 0 | 60  | N | Pass        |
| 547403 | F | Addis Abat A Level or I    | 0 | 60  | N | Pass        |
| 547409 | F | Sidamo Re Lower Than       | 0 | 60  | N | Fail        |
| 547427 | F | Tigray Region Lower Than   | 0 | 60  | N | Pass        |
| 547466 | F | South Wes Lower Than       | 0 | 60  | N | Pass        |
| 547472 | M | Sidamo Re Lower Than       | 0 | 60  | N | Withdrawn   |
| 547620 | F | Amhara Re A Level or I     | 0 | 60  | N | Fail        |
| 547663 | F | South Regi Lower Than      | 0 | 60  | N | Fail        |
| 547689 | F | Tigray Region Lower Than   | 0 | 120 | N | Pass        |
| 547690 | F | South Regi A Level or I    | 0 | 60  | N | Pass        |
| 547697 | F | Addis Abat A Level or I    | 0 | 60  | N | Pass        |
| 547755 | F | Tigray Region Lower Than   | 0 | 120 | N | Withdrawn   |
| 547757 | M | South Wes A Level or I     | 0 | 60  | N | Distinction |
| 547841 | F | South Regi A Level or I    | 0 | 120 | N | Distinction |
| 547855 | F | Sidamo Re Lower Than       | 0 | 60  | N | Withdrawn   |
| 547873 | F | Tigray Region Lower Than   | 0 | 60  | Y | Pass        |
| 547892 | F | Sidamo Re A Level or I     | 0 | 60  | N | Pass        |
| 547902 | F | South Wes Lower Than       | 0 | 60  | N | Pass        |
| 547903 | F | Oromia Re Lower Than       | 0 | 60  | N | Pass        |
| 548090 | F | South Regi A Level or I    | 0 | 60  | N | Distinction |
| 548097 | F | Afar Region Lower Than     | 0 | 60  | Y | Fail        |
| 548106 | F | Sidamo Re A Level or I     | 0 | 60  | N | Withdrawn   |
| 548124 | F | South Regi A Level or I    | 0 | 60  | N | Pass        |
| 548241 | M | South Regi HE Qualific     | 0 | 120 | N | Pass        |
| 548255 | F | South Wes A Level or I     | 0 | 60  | N | Distinction |

|        |   |                         |   |     |   |             |
|--------|---|-------------------------|---|-----|---|-------------|
| 548275 | F | Addis Abat A Level or I | 0 | 120 | N | Pass        |
| 548307 | F | Sidamo Re A Level or I  | 0 | 120 | N | Fail        |
| 548321 | F | South Wes A Level or I  | 0 | 60  | N | Withdrawn   |
| 548334 | F | Oromia Re A Level or I  | 0 | 60  | N | Pass        |
| 548344 | M | South Regi Lower Tha    | 0 | 60  | N | Fail        |
| 548355 | F | Oromia Re A Level or I  | 0 | 60  | N | Withdrawn   |
| 548403 | F | Sidamo Re A Level or I  | 0 | 60  | N | Fail        |
| 548439 | F | Addis Abat Lower Tha    | 0 | 60  | N | Pass        |
| 548488 | F | Oromia Re A Level or I  | 0 | 60  | Y | Withdrawn   |
| 548504 | M | Amhara Re A Level or I  | 0 | 120 | N | Distinction |
| 548520 | M | Tigrai Regi Lower Tha   | 0 | 60  | N | Fail        |
| 548585 | F | Sidamo Re Lower Tha     | 0 | 60  | N | Withdrawn   |
| 548617 | F | Sidamo Re A Level or I  | 0 | 60  | N | Distinction |
| 548642 | F | South Regi A Level or I | 0 | 60  | N | Withdrawn   |
| 548714 | F | South Regi A Level or I | 0 | 120 | N | Pass        |
| 548744 | M | South Regi A Level or I | 0 | 60  | N | Pass        |
| 548791 | F | Afar Regio HE Qualific  | 0 | 60  | Y | Pass        |
| 548800 | F | South Regi A Level or I | 0 | 120 | N | Withdrawn   |
| 548813 | F | South Regi Lower Tha    | 0 | 60  | N | Fail        |
| 548831 | F | Amhara Re A Level or I  | 0 | 60  | N | Withdrawn   |
| 548834 | F | South Wes HE Qualific   | 0 | 60  | N | Pass        |
| 548838 | F | South Wes HE Qualific   | 0 | 60  | N | Pass        |
| 548839 | M | South Wes A Level or I  | 0 | 60  | N | Pass        |
| 548843 | M | South Wes A Level or I  | 0 | 60  | N | Pass        |
| 548871 | F | South Regi A Level or I | 0 | 60  | N | Fail        |
| 548881 | F | South Wes Lower Tha     | 0 | 60  | N | Withdrawn   |
| 548884 | F | Tigrai Regi Lower Tha   | 0 | 120 | N | Pass        |
| 548885 | F | Oromia Re Lower Tha     | 0 | 60  | Y | Distinction |
| 548900 | F | Addis Abat Lower Tha    | 0 | 60  | N | Withdrawn   |
| 548921 | F | South Wes Lower Tha     | 0 | 60  | N | Pass        |
| 548924 | F | Addis Abat HE Qualific  | 0 | 60  | N | Fail        |
| 548935 | F | South Wes A Level or I  | 0 | 60  | N | Pass        |
| 548954 | F | Addis Abat A Level or I | 0 | 60  | N | Pass        |
| 548981 | F | Sidamo Re A Level or I  | 0 | 60  | N | Fail        |
| 548990 | F | Addis Abat A Level or I | 0 | 90  | N | Withdrawn   |
| 549009 | F | Sidamo Re No Formal     | 0 | 60  | N | Withdrawn   |
| 549047 | F | Oromia Re Lower Tha     | 0 | 60  | N | Pass        |
| 549078 | F | Sidamo Re A Level or I  | 0 | 90  | N | Fail        |
| 549106 | F | Afar Regio A Level or I | 0 | 60  | N | Fail        |
| 549143 | F | South Wes Lower Tha     | 0 | 60  | N | Withdrawn   |
| 549158 | F | Amhara Re A Level or I  | 0 | 60  | N | Pass        |
| 549196 | F | South Regi A Level or I | 0 | 120 | N | Distinction |
| 549203 | F | Sidamo Re Lower Tha     | 0 | 60  | N | Fail        |
| 549204 | F | Sidamo Re Lower Tha     | 0 | 60  | N | Fail        |
| 549261 | F | Addis Abat HE Qualific  | 0 | 60  | N | Pass        |
| 549278 | F | Amhara Re A Level or I  | 0 | 60  | N | Fail        |
| 549352 | F | Amhara Re Lower Tha     | 0 | 60  | N | Withdrawn   |

|        |   |                             |   |     |   |             |
|--------|---|-----------------------------|---|-----|---|-------------|
| 549391 | F | South Wes A Level or I      | 0 | 60  | N | Distinction |
| 549406 | F | Afar Region A Level or I    | 0 | 60  | N | Fail        |
| 549512 | F | Amhara Region Lower Than    | 0 | 150 | N | Withdrawn   |
| 549563 | M | North Region Lower Than     | 0 | 60  | N | Withdrawn   |
| 549568 | F | Oromia Region A Level or I  | 0 | 60  | N | Pass        |
| 549590 | F | Sidamo Region Lower Than    | 0 | 60  | N | Withdrawn   |
| 549622 | F | Addis Ababa A Level or I    | 0 | 180 | N | Withdrawn   |
| 549651 | F | Sidamo Region Lower Than    | 0 | 60  | N | Pass        |
| 549713 | F | South Region Lower Than     | 0 | 60  | Y | Withdrawn   |
| 549732 | F | Sidamo Region A Level or I  | 0 | 60  | N | Pass        |
| 549754 | F | South Region Lower Than     | 0 | 60  | N | Pass        |
| 549862 | F | South Region A Level or I   | 0 | 60  | N | Pass        |
| 549873 | F | Amhara Region A Level or I  | 0 | 60  | N | Withdrawn   |
| 549907 | F | South Wes Lower Than        | 0 | 60  | N | Fail        |
| 550018 | F | Somalia Region Lower Than   | 0 | 60  | N | Fail        |
| 550051 | F | Somalia Region A Level or I | 0 | 60  | N | Withdrawn   |
| 550077 | F | South Region A Level or I   | 0 | 60  | N | Pass        |
| 550098 | F | Sidamo Region Lower Than    | 0 | 60  | N | Fail        |
| 550106 | F | Somalia Region Lower Than   | 0 | 60  | N | Withdrawn   |
| 550163 | F | Addis Ababa Lower Than      | 0 | 60  | N | Fail        |
| 550208 | F | South Wes Lower Than        | 0 | 60  | Y | Withdrawn   |
| 550209 | F | Amhara Region A Level or I  | 0 | 60  | N | Pass        |
| 550278 | F | North Region Lower Than     | 0 | 60  | N | Withdrawn   |
| 550322 | F | Somalia Region Lower Than   | 0 | 60  | N | Fail        |
| 550342 | F | Sidamo Region Lower Than    | 0 | 60  | N | Pass        |
| 550354 | F | North Region A Level or I   | 0 | 60  | N | Distinction |
| 550381 | F | Addis Ababa A Level or I    | 0 | 60  | Y | Pass        |
| 550400 | F | Addis Ababa A Level or I    | 0 | 60  | Y | Fail        |
| 550403 | F | South Wes A Level or I      | 0 | 60  | N | Pass        |
| 550428 | F | Somalia Region A Level or I | 0 | 60  | N | Fail        |
| 550429 | F | Somalia Region A Level or I | 0 | 60  | N | Fail        |
| 550520 | F | Tigray Region Lower Than    | 0 | 60  | N | Pass        |
| 550549 | F | Tigray Region HE Qualific   | 0 | 60  | N | Pass        |
| 550597 | F | Sidamo Region Lower Than    | 0 | 60  | N | Pass        |
| 550613 | F | North Region Lower Than     | 0 | 60  | N | Pass        |
| 550668 | F | South Region A Level or I   | 0 | 60  | N | Fail        |
| 550676 | F | Sidamo Region Lower Than    | 0 | 60  | N | Withdrawn   |
| 550707 | M | Tigray Region A Level or I  | 0 | 120 | N | Pass        |
| 550708 | F | Tigray Region HE Qualific   | 0 | 120 | N | Pass        |
| 550777 | M | Somalia Region A Level or I | 0 | 90  | N | Withdrawn   |
| 550842 | M | Amhara Region A Level or I  | 0 | 60  | N | Withdrawn   |
| 550867 | F | Addis Ababa Lower Than      | 0 | 60  | N | Withdrawn   |
| 550898 | F | Sidamo Region A Level or I  | 0 | 60  | Y | Fail        |
| 550921 | F | Sidamo Region Lower Than    | 0 | 60  | N | Pass        |
| 550923 | F | Sidamo Region Lower Than    | 0 | 120 | N | Pass        |
| 550960 | F | South Wes A Level or I      | 0 | 120 | N | Withdrawn   |
| 550963 | F | Somalia Region A Level or I | 0 | 60  | N | Pass        |

|        |   |             |              |   |     |   |             |
|--------|---|-------------|--------------|---|-----|---|-------------|
| 551032 | F | North Regi  | A Level or I | 0 | 60  | N | Fail        |
| 551053 | F | Tigrai Regi | Lower Than   | 0 | 60  | Y | Withdrawn   |
| 551080 | F | Addis Abak  | A Level or I | 0 | 60  | N | Pass        |
| 551129 | F | Addis Abak  | A Level or I | 0 | 60  | Y | Pass        |
| 551172 | F | Afar Regioi | A Level or I | 0 | 120 | Y | Withdrawn   |
| 551274 | F | Sidamo Re,  | A Level or I | 0 | 60  | N | Pass        |
| 551282 | F | Sidamo Re,  | HE Qualific  | 0 | 60  | N | Fail        |
| 551480 | F | Addis Abak  | A Level or I | 0 | 60  | N | Pass        |
| 551487 | F | Afar Regioi | Lower Than   | 0 | 120 | N | Pass        |
| 551504 | M | Sidamo Re,  | A Level or I | 0 | 60  | N | Fail        |
| 551576 | F | Addis Abak  | Lower Than   | 0 | 60  | N | Distinction |
| 551601 | F | Amhara Re   | Lower Than   | 0 | 60  | N | Withdrawn   |
| 551655 | F | Afar Regioi | Lower Than   | 0 | 60  | N | Withdrawn   |
| 551702 | F | South Regi  | A Level or I | 0 | 60  | N | Withdrawn   |
| 551706 | F | Afar Regioi | A Level or I | 0 | 60  | N | Pass        |
| 551714 | F | Afar Regioi | A Level or I | 0 | 60  | N | Pass        |
| 551715 | F | Afar Regioi | HE Qualific  | 0 | 60  | N | Pass        |
| 551716 | F | Afar Regioi | HE Qualific  | 0 | 60  | N | Pass        |
| 551724 | F | Sidamo Re,  | A Level or I | 0 | 60  | N | Withdrawn   |
| 551759 | F | South Regi  | Lower Than   | 0 | 60  | N | Fail        |
| 551762 | F | Addis Abak  | Lower Than   | 0 | 60  | N | Withdrawn   |
| 551770 | F | Afar Regioi | HE Qualific  | 0 | 60  | Y | Pass        |
| 551886 | F | North Regi  | A Level or I | 0 | 120 | N | Pass        |
| 551891 | F | Sidamo Re,  | Lower Than   | 0 | 60  | N | Withdrawn   |
| 551895 | F | Afar Regioi | A Level or I | 0 | 60  | N | Pass        |
| 551906 | F | Addis Abak  | A Level or I | 0 | 60  | N | Withdrawn   |
| 551938 | F | North Regi  | Lower Than   | 0 | 60  | N | Pass        |
| 551954 | F | South Wes   | A Level or I | 0 | 60  | N | Pass        |
| 551985 | F | Sidamo Re,  | Lower Than   | 0 | 60  | N | Fail        |
| 552007 | F | Sidamo Re,  | A Level or I | 0 | 60  | N | Pass        |
| 552017 | F | South Regi  | HE Qualific  | 0 | 60  | N | Distinction |
| 552025 | M | Amhara Re   | A Level or I | 0 | 60  | N | Withdrawn   |
| 552039 | F | Oromia Re   | A Level or I | 0 | 60  | Y | Distinction |
| 552056 | F | Sidamo Re,  | A Level or I | 0 | 120 | N | Withdrawn   |
| 552069 | F | Sidamo Re,  | A Level or I | 0 | 60  | N | Withdrawn   |
| 552110 | F | Sidamo Re,  | Lower Than   | 0 | 90  | N | Fail        |
| 552135 | F | Afar Regioi | A Level or I | 0 | 60  | N | Fail        |
| 552222 | F | Somalia Re  | Lower Than   | 0 | 60  | N | Withdrawn   |
| 552273 | M | Somalia Re  | Lower Than   | 0 | 60  | N | Pass        |
| 552420 | F | South Regi  | A Level or I | 0 | 60  | N | Withdrawn   |
| 552535 | M | South Regi  | A Level or I | 0 | 60  | N | Pass        |
| 552640 | F | South Regi  | Lower Than   | 0 | 60  | N | Withdrawn   |
| 552667 | M | Addis Abak  | Lower Than   | 0 | 60  | Y | Pass        |
| 552701 | M | Somalia Re  | A Level or I | 0 | 60  | N | Pass        |
| 552718 | F | Somalia Re  | Lower Than   | 0 | 60  | N | Fail        |
| 552719 | F | Amhara Re   | A Level or I | 0 | 60  | N | Withdrawn   |
| 552749 | M | Afar Regioi | HE Qualific  | 0 | 60  | Y | Fail        |

|        |   |                          |   |     |   |             |
|--------|---|--------------------------|---|-----|---|-------------|
| 552822 | F | South Wes Lower Thai     | 0 | 60  | N | Pass        |
| 552826 | F | South Regi HE Qualific   | 0 | 60  | N | Pass        |
| 552859 | F | Amhara Re Lower Thai     | 0 | 60  | N | Pass        |
| 552894 | F | Amhara Re Lower Thai     | 0 | 60  | N | Pass        |
| 552902 | M | South Wes A Level or I   | 0 | 60  | N | Pass        |
| 552914 | F | Sidamo Re A Level or I   | 0 | 60  | N | Fail        |
| 552929 | F | Oromia Re A Level or I   | 0 | 120 | N | Pass        |
| 552939 | M | South Regi A Level or I  | 0 | 60  | N | Withdrawn   |
| 552991 | M | Sidamo Re Lower Thai     | 0 | 60  | N | Pass        |
| 553047 | F | Addis Abak Lower Thai    | 0 | 60  | N | Pass        |
| 553125 | F | Oromia Re A Level or I   | 0 | 120 | Y | Distinction |
| 553320 | F | Tigrai Regi Lower Thai   | 0 | 60  | N | Fail        |
| 553321 | F | Addis Abak A Level or I  | 0 | 60  | N | Distinction |
| 553442 | F | Sidamo Re Lower Thai     | 0 | 60  | N | Pass        |
| 553443 | M | Afar Regioi Lower Thai   | 0 | 60  | N | Fail        |
| 553462 | F | Afar Regioi Lower Thai   | 0 | 60  | N | Pass        |
| 553487 | F | Oromia Re A Level or I   | 0 | 120 | N | Distinction |
| 553490 | F | Amhara Re Lower Thai     | 0 | 60  | N | Fail        |
| 553502 | F | South Regi Lower Thai    | 0 | 60  | N | Pass        |
| 553508 | F | South Regi A Level or I  | 0 | 120 | Y | Pass        |
| 553520 | F | Addis Abak A Level or I  | 0 | 60  | N | Withdrawn   |
| 553526 | F | South Regi Lower Thai    | 0 | 60  | N | Withdrawn   |
| 553572 | F | Sidamo Re A Level or I   | 0 | 60  | N | Pass        |
| 553716 | F | South Regi A Level or I  | 0 | 60  | N | Pass        |
| 553729 | F | South Regi Lower Thai    | 0 | 60  | N | Fail        |
| 553755 | F | Tigrai Regi Lower Thai   | 0 | 60  | N | Fail        |
| 553763 | F | Afar Regioi Lower Thai   | 0 | 120 | N | Fail        |
| 553800 | F | Sidamo Re Lower Thai     | 0 | 90  | N | Fail        |
| 553807 | F | Oromia Re Lower Thai     | 0 | 60  | Y | Withdrawn   |
| 553840 | F | Amhara Re A Level or I   | 0 | 60  | Y | Distinction |
| 553938 | F | Addis Abak HE Qualific   | 0 | 120 | N | Withdrawn   |
| 554068 | F | Addis Abak HE Qualific   | 0 | 60  | N | Fail        |
| 554083 | F | South Regi A Level or I  | 0 | 60  | N | Pass        |
| 554139 | F | Afar Regioi HE Qualific  | 0 | 60  | N | Fail        |
| 554203 | F | Sidamo Re No Formal      | 0 | 60  | N | Withdrawn   |
| 554206 | F | Tigrai Regi Lower Thai   | 0 | 180 | Y | Pass        |
| 554226 | M | South Regi Lower Thai    | 0 | 60  | N | Pass        |
| 554249 | F | North Regi A Level or I  | 0 | 150 | N | Withdrawn   |
| 554290 | F | South Wes Lower Thai     | 0 | 60  | N | Withdrawn   |
| 554294 | F | Afar Regioi A Level or I | 0 | 60  | N | Fail        |
| 554336 | F | Sidamo Re HE Qualific    | 0 | 60  | N | Pass        |
| 554344 | F | Afar Regioi Lower Thai   | 0 | 60  | N | Distinction |
| 554352 | F | Tigrai Regi Lower Thai   | 0 | 120 | N | Pass        |
| 554362 | F | Oromia Re A Level or I   | 0 | 60  | N | Withdrawn   |
| 554374 | F | Sidamo Re A Level or I   | 0 | 120 | N | Distinction |
| 554393 | M | South Regi A Level or I  | 0 | 60  | N | Fail        |
| 554454 | M | Sidamo Re A Level or I   | 0 | 120 | N | Withdrawn   |

|        |   |                           |   |     |   |             |
|--------|---|---------------------------|---|-----|---|-------------|
| 554482 | F | South Regi Lower Tha      | 0 | 60  | N | Withdrawn   |
| 554512 | F | Sidamo Re, A Level or I   | 0 | 60  | N | Withdrawn   |
| 554545 | M | Afar Regioi Lower Tha     | 0 | 60  | N | Withdrawn   |
| 554551 | F | Oromia Re Lower Tha       | 0 | 60  | N | Fail        |
| 554608 | F | Tigrai Regio Lower Tha    | 0 | 120 | N | Pass        |
| 554637 | F | Addis Abak A Level or I   | 0 | 60  | N | Withdrawn   |
| 554783 | F | North Regi Lower Tha      | 0 | 60  | N | Withdrawn   |
| 554795 | F | South Wes A Level or I    | 0 | 60  | N | Distinction |
| 554818 | F | Sidamo Re, A Level or I   | 0 | 60  | N | Withdrawn   |
| 554830 | M | Addis Abak A Level or I   | 0 | 120 | N | Fail        |
| 554894 | F | Addis Abak Lower Tha      | 0 | 60  | N | Pass        |
| 554898 | F | Afar Regioi Lower Tha     | 0 | 60  | N | Fail        |
| 554920 | M | Sidamo Re, A Level or I   | 0 | 60  | N | Withdrawn   |
| 554930 | F | Oromia Re Lower Tha       | 0 | 60  | N | Withdrawn   |
| 554986 | F | Sidamo Re, Lower Tha      | 0 | 60  | N | Fail        |
| 554998 | M | Sidamo Re, Lower Tha      | 0 | 120 | N | Pass        |
| 555035 | F | Sidamo Re, Lower Tha      | 0 | 120 | N | Withdrawn   |
| 555059 | F | Somalia Re HE Qualific    | 0 | 120 | N | Distinction |
| 555086 | F | Sidamo Re, A Level or I   | 0 | 60  | N | Pass        |
| 555102 | M | South Regi Lower Tha      | 0 | 60  | N | Pass        |
| 555157 | M | Addis Abak A Level or I   | 0 | 60  | N | Fail        |
| 555212 | F | Sidamo Re, Lower Tha      | 0 | 60  | N | Withdrawn   |
| 555263 | F | South Wes A Level or I    | 0 | 60  | N | Pass        |
| 555309 | M | Tigrai Regio A Level or I | 0 | 60  | N | Pass        |
| 555338 | F | South Wes A Level or I    | 0 | 60  | Y | Withdrawn   |
| 555407 | F | South Wes A Level or I    | 0 | 60  | N | Fail        |
| 555414 | F | Amhara Re Lower Tha       | 0 | 60  | N | Pass        |
| 555552 | F | Sidamo Re, Lower Tha      | 0 | 120 | Y | Withdrawn   |
| 555627 | M | Tigrai Regio Lower Tha    | 0 | 60  | N | Fail        |
| 555667 | F | South Regi HE Qualific    | 0 | 120 | N | Distinction |
| 555670 | F | Sidamo Re, Lower Tha      | 0 | 60  | N | Pass        |
| 555672 | F | South Regi A Level or I   | 0 | 120 | N | Pass        |
| 555673 | F | Addis Abak Lower Tha      | 0 | 60  | N | Fail        |
| 555674 | M | Sidamo Re, A Level or I   | 0 | 120 | N | Distinction |
| 555675 | F | Sidamo Re, HE Qualific    | 0 | 120 | N | Distinction |
| 555695 | F | Oromia Re A Level or I    | 0 | 60  | N | Pass        |
| 555707 | F | Addis Abak A Level or I   | 0 | 60  | N | Withdrawn   |
| 555747 | F | Afar Regioi Lower Tha     | 0 | 60  | Y | Pass        |
| 555837 | F | South Regi A Level or I   | 0 | 60  | N | Withdrawn   |
| 555838 | F | Tigrai Regio HE Qualific  | 0 | 120 | N | Pass        |
| 555880 | M | Afar Regioi Lower Tha     | 0 | 60  | Y | Fail        |
| 555902 | F | Afar Regioi A Level or I  | 0 | 60  | N | Fail        |
| 555909 | F | Sidamo Re, Lower Tha      | 0 | 60  | Y | Withdrawn   |
| 555930 | F | South Wes Lower Tha       | 0 | 75  | N | Fail        |
| 555935 | F | South Regi A Level or I   | 0 | 60  | N | Withdrawn   |
| 555946 | F | Sidamo Re, Lower Tha      | 0 | 60  | N | Fail        |
| 555995 | F | Sidamo Re, Lower Tha      | 0 | 60  | N | Withdrawn   |

|        |   |             |              |   |     |   |             |
|--------|---|-------------|--------------|---|-----|---|-------------|
| 556077 | M | Tigrai Regi | A Level or I | 0 | 60  | N | Withdrawn   |
| 556138 | F | Somalia Re  | HE Qualific  | 0 | 60  | N | Withdrawn   |
| 556224 | F | Oromia Re   | Lower Than   | 0 | 60  | N | Fail        |
| 556284 | M | South Regi  | HE Qualific  | 0 | 120 | N | Pass        |
| 556292 | F | South Regi  | Lower Than   | 0 | 120 | N | Distinction |
| 556301 | F | Oromia Re   | HE Qualific  | 0 | 120 | N | Pass        |
| 556318 | F | Afar Regio  | Lower Than   | 0 | 60  | N | Fail        |
| 556349 | F | South Wes   | A Level or I | 0 | 60  | N | Pass        |
| 556481 | F | Sidamo Re   | A Level or I | 0 | 60  | N | Withdrawn   |
| 556502 | F | South Wes   | Lower Than   | 0 | 60  | N | Pass        |
| 556553 | F | Oromia Re   | A Level or I | 0 | 60  | N | Pass        |
| 556568 | F | Addis Aba   | Lower Than   | 0 | 60  | N | Withdrawn   |
| 556585 | F | Sidamo Re   | Lower Than   | 0 | 60  | N | Withdrawn   |
| 556605 | F | Sidamo Re   | HE Qualific  | 0 | 60  | N | Pass        |
| 556648 | F | North Regi  | Lower Than   | 0 | 60  | N | Fail        |
| 556692 | F | South Regi  | Lower Than   | 0 | 60  | N | Withdrawn   |
| 556840 | F | South Regi  | A Level or I | 0 | 60  | N | Withdrawn   |
| 556860 | F | South Regi  | A Level or I | 0 | 60  | N | Fail        |
| 556863 | F | South Wes   | A Level or I | 0 | 60  | N | Withdrawn   |
| 556865 | F | South Regi  | A Level or I | 0 | 60  | N | Pass        |
| 556871 | F | South Regi  | A Level or I | 0 | 60  | N | Distinction |
| 556876 | F | South Regi  | A Level or I | 0 | 60  | N | Distinction |
| 556877 | F | South Wes   | A Level or I | 0 | 60  | N | Withdrawn   |
| 556878 | F | South Wes   | Lower Than   | 0 | 60  | N | Pass        |
| 556882 | F | South Wes   | Lower Than   | 0 | 60  | N | Withdrawn   |
| 556883 | F | South Regi  | A Level or I | 0 | 60  | N | Pass        |
| 556887 | F | South Regi  | A Level or I | 0 | 60  | N | Pass        |
| 556892 | F | South Regi  | A Level or I | 0 | 60  | N | Pass        |
| 556898 | F | South Regi  | Lower Than   | 0 | 60  | N | Pass        |
| 556929 | F | Amhara Re   | A Level or I | 0 | 120 | N | Withdrawn   |
| 556959 | F | South Wes   | A Level or I | 0 | 60  | N | Pass        |
| 556986 | F | South Wes   | Lower Than   | 0 | 60  | Y | Withdrawn   |
| 556987 | F | Amhara Re   | Lower Than   | 0 | 60  | N | Fail        |
| 556988 | F | South Wes   | Lower Than   | 0 | 60  | N | Withdrawn   |
| 556990 | F | South Wes   | Lower Than   | 0 | 60  | N | Pass        |
| 556992 | F | South Wes   | HE Qualific  | 0 | 60  | N | Pass        |
| 556997 | F | South Wes   | A Level or I | 0 | 60  | N | Pass        |
| 556999 | F | South Wes   | HE Qualific  | 0 | 60  | N | Pass        |
| 557006 | F | South Wes   | Lower Than   | 0 | 60  | N | Pass        |
| 557024 | F | Addis Aba   | A Level or I | 0 | 120 | N | Pass        |
| 557032 | F | Addis Aba   | HE Qualific  | 0 | 120 | N | Distinction |
| 557057 | M | South Wes   | Lower Than   | 0 | 60  | N | Pass        |
| 557060 | F | South Wes   | HE Qualific  | 0 | 60  | N | Pass        |
| 557145 | F | South Wes   | A Level or I | 0 | 60  | N | Fail        |
| 557155 | F | South Regi  | Lower Than   | 0 | 60  | N | Withdrawn   |
| 557170 | F | Sidamo Re   | A Level or I | 0 | 60  | N | Withdrawn   |
| 557220 | F | Tigrai Regi | Lower Than   | 0 | 60  | N | Pass        |

|        |   |                          |   |     |   |             |
|--------|---|--------------------------|---|-----|---|-------------|
| 557285 | F | South Regi Lower Tha     | 0 | 60  | N | Pass        |
| 557308 | F | North Regi A Level or I  | 0 | 75  | N | Fail        |
| 557325 | F | Addis Abak A Level or I  | 0 | 60  | N | Distinction |
| 557338 | F | Amhara Re Lower Tha      | 0 | 60  | N | Withdrawn   |
| 557351 | F | South Wes A Level or I   | 0 | 90  | N | Fail        |
| 557451 | F | Sidamo Re Lower Tha      | 0 | 60  | N | Fail        |
| 557528 | F | Sidamo Re Lower Tha      | 0 | 60  | N | Pass        |
| 557594 | F | Somalia Re A Level or I  | 0 | 60  | N | Pass        |
| 557622 | F | Sidamo Re Lower Tha      | 0 | 60  | N | Distinction |
| 557709 | F | South Wes A Level or I   | 0 | 60  | N | Withdrawn   |
| 557729 | F | Amhara Re A Level or I   | 0 | 60  | N | Withdrawn   |
| 557758 | F | Somalia Re Lower Tha     | 0 | 60  | N | Pass        |
| 557775 | F | Oromia Re HE Qualific    | 0 | 60  | N | Pass        |
| 557803 | M | North Regi Lower Tha     | 0 | 60  | N | Fail        |
| 557827 | F | Amhara Re A Level or I   | 0 | 60  | Y | Fail        |
| 557865 | F | Sidamo Re Lower Tha      | 0 | 60  | N | Fail        |
| 557935 | F | Sidamo Re Lower Tha      | 0 | 60  | Y | Fail        |
| 557938 | F | Sidamo Re No Formal      | 0 | 60  | N | Withdrawn   |
| 557968 | F | Tigrai Regi A Level or I | 0 | 70  | N | Distinction |
| 557979 | F | Sidamo Re A Level or I   | 0 | 60  | N | Pass        |
| 557997 | M | Amhara Re Lower Tha      | 0 | 60  | N | Withdrawn   |
| 558024 | F | South Regi A Level or I  | 0 | 60  | N | Pass        |
| 558040 | F | Sidamo Re A Level or I   | 0 | 120 | N | Pass        |
| 558042 | F | Sidamo Re HE Qualific    | 0 | 120 | N | Distinction |
| 558066 | F | Oromia Re Lower Tha      | 0 | 120 | N | Distinction |
| 558068 | F | Oromia Re A Level or I   | 0 | 120 | N | Pass        |
| 558075 | F | South Regi Lower Tha     | 0 | 60  | N | Pass        |
| 558092 | F | Sidamo Re A Level or I   | 0 | 60  | Y | Fail        |
| 558099 | F | Oromia Re A Level or I   | 0 | 60  | N | Distinction |
| 558113 | F | Addis Abak A Level or I  | 0 | 60  | N | Pass        |
| 558114 | F | Addis Abak Lower Tha     | 0 | 120 | N | Fail        |
| 558146 | F | Oromia Re Lower Tha      | 0 | 60  | N | Withdrawn   |
| 558163 | F | South Wes Lower Tha      | 0 | 60  | N | Withdrawn   |
| 558168 | F | Tigrai Regi A Level or I | 0 | 60  | N | Pass        |
| 558212 | F | Addis Abak A Level or I  | 0 | 60  | N | Withdrawn   |
| 558231 | F | Addis Abak Lower Tha     | 0 | 60  | N | Withdrawn   |
| 558247 | F | South Wes Lower Tha      | 0 | 60  | N | Fail        |
| 558250 | F | Somalia Re Lower Tha     | 0 | 60  | N | Pass        |
| 558324 | M | South Wes Lower Tha      | 0 | 60  | N | Withdrawn   |
| 558326 | F | South Regi Lower Tha     | 0 | 60  | N | Withdrawn   |
| 558373 | M | Somalia Re A Level or I  | 0 | 60  | N | Distinction |
| 558395 | M | Amhara Re HE Qualific    | 0 | 60  | N | Withdrawn   |
| 558435 | F | Tigrai Regi HE Qualific  | 0 | 60  | N | Distinction |
| 558602 | F | Addis Abak Lower Tha     | 0 | 60  | N | Fail        |
| 558622 | F | Addis Abak A Level or I  | 0 | 60  | N | Pass        |
| 558654 | F | North Regi A Level or I  | 0 | 60  | N | Withdrawn   |
| 558662 | F | Sidamo Re Lower Tha      | 0 | 60  | N | Fail        |



|        |   |                          |   |     |   |             |
|--------|---|--------------------------|---|-----|---|-------------|
| 558689 | F | North Regi A Level or I  | 0 | 120 | N | Pass        |
| 558701 | F | South Regi A Level or I  | 0 | 60  | N | Withdrawn   |
| 558703 | F | Somalia Re A Level or I  | 0 | 60  | N | Pass        |
| 558747 | F | Sidamo Re A Level or I   | 0 | 60  | N | Pass        |
| 558769 | F | Afar Regio Lower Than    | 0 | 60  | N | Fail        |
| 558809 | F | South Regi A Level or I  | 0 | 60  | N | Fail        |
| 558820 | F | Afar Regio Lower Than    | 0 | 60  | N | Fail        |
| 558903 | F | Somalia Re HE Qualific   | 0 | 60  | N | Fail        |
| 558955 | F | South Regi A Level or I  | 0 | 60  | N | Fail        |
| 558965 | F | Amhara Re Lower Than     | 0 | 60  | N | Pass        |
| 558974 | F | South Regi No Formal     | 0 | 135 | N | Withdrawn   |
| 559011 | F | South Regi Lower Than    | 0 | 60  | N | Withdrawn   |
| 559031 | F | Afar Regio Lower Than    | 0 | 60  | N | Pass        |
| 559173 | F | North Regi A Level or I  | 0 | 60  | N | Fail        |
| 559180 | F | Sidamo Re A Level or I   | 0 | 60  | N | Pass        |
| 559227 | F | South Regi Lower Than    | 0 | 60  | N | Withdrawn   |
| 559253 | F | Afar Regio Lower Than    | 0 | 60  | N | Pass        |
| 559291 | F | South Regi A Level or I  | 0 | 60  | N | Withdrawn   |
| 559350 | F | Oromia Re Lower Than     | 0 | 60  | Y | Pass        |
| 559389 | F | South Regi Lower Than    | 0 | 60  | N | Pass        |
| 559425 | F | Oromia Re Lower Than     | 0 | 60  | N | Withdrawn   |
| 559452 | M | South Regi HE Qualific   | 0 | 120 | N | Distinction |
| 559458 | F | South Regi A Level or I  | 0 | 120 | N | Pass        |
| 559475 | F | Oromia Re A Level or I   | 0 | 120 | N | Pass        |
| 559495 | F | North Regi A Level or I  | 0 | 60  | N | Distinction |
| 559595 | F | Tigrai Regi A Level or I | 0 | 60  | N | Pass        |
| 559603 | F | Somalia Re A Level or I  | 0 | 60  | N | Pass        |
| 559606 | F | Somalia Re HE Qualific   | 0 | 60  | N | Pass        |
| 559608 | F | Somalia Re HE Qualific   | 0 | 60  | N | Pass        |
| 559610 | F | Somalia Re A Level or I  | 0 | 60  | N | Fail        |
| 559611 | F | Addis Abak A Level or I  | 0 | 60  | N | Pass        |
| 559651 | F | Somalia Re A Level or I  | 0 | 60  | N | Pass        |
| 559697 | F | South Wes A Level or I   | 0 | 60  | N | Withdrawn   |
| 559744 | F | South Regi Post Gradu    | 0 | 60  | N | Pass        |
| 559808 | F | Afar Regio Lower Than    | 0 | 60  | N | Fail        |
| 559989 | F | Tigrai Regi A Level or I | 0 | 60  | N | Fail        |
| 560005 | F | Sidamo Re A Level or I   | 0 | 60  | N | Withdrawn   |
| 560012 | F | Somalia Re Lower Than    | 0 | 120 | N | Fail        |
| 560075 | F | South Regi A Level or I  | 0 | 120 | N | Pass        |
| 560102 | F | Addis Abak Lower Than    | 0 | 60  | N | Withdrawn   |
| 560117 | M | South Regi Lower Than    | 0 | 60  | N | Withdrawn   |
| 560160 | F | Afar Regio Lower Than    | 0 | 60  | N | Fail        |
| 560161 | F | South Wes Lower Than     | 0 | 60  | N | Withdrawn   |
| 560170 | F | Somalia Re HE Qualific   | 0 | 60  | N | Pass        |
| 560185 | F | Oromia Re A Level or I   | 0 | 60  | N | Withdrawn   |
| 560208 | M | Addis Abak Lower Than    | 0 | 60  | N | Fail        |
| 560319 | F | Addis Abak Lower Than    | 0 | 60  | N | Pass        |

|         |   |                            |   |     |   |             |
|---------|---|----------------------------|---|-----|---|-------------|
| 560335  | F | Afar Region Lower Than     | 0 | 60  | N | Withdrawn   |
| 560455  | F | North Region A Level or    | 0 | 120 | N | Pass        |
| 560458  | F | Oromia Region A Level or   | 0 | 120 | N | Withdrawn   |
| 560468  | F | Oromia Region A Level or   | 0 | 60  | N | Pass        |
| 560891  | F | South West Lower Than      | 0 | 60  | N | Fail        |
| 560968  | F | Tigray Region HE Qualific  | 0 | 120 | N | Distinction |
| 560970  | M | Tigray Region HE Qualific  | 0 | 120 | N | Pass        |
| 561138  | F | South Region A Level or    | 0 | 60  | N | Pass        |
| 561161  | F | Oromia Region HE Qualific  | 0 | 120 | N | Distinction |
| 561164  | M | North Region A Level or    | 0 | 120 | N | Distinction |
| 561166  | F | Oromia Region A Level or   | 0 | 120 | N | Distinction |
| 561167  | F | Oromia Region HE Qualific  | 0 | 120 | N | Pass        |
| 561343  | M | Tigray Region A Level or   | 0 | 60  | N | Pass        |
| 561366  | F | South Region Lower Than    | 0 | 60  | N | Withdrawn   |
| 561437  | F | South West A Level or      | 0 | 120 | N | Pass        |
| 561444  | F | South West Lower Than      | 0 | 120 | N | Pass        |
| 561445  | F | South West A Level or      | 0 | 120 | N | Pass        |
| 561448  | F | South West A Level or      | 0 | 120 | N | Pass        |
| 561452  | F | South West A Level or      | 0 | 120 | N | Distinction |
| 561455  | F | South West A Level or      | 0 | 120 | N | Pass        |
| 561458  | F | South West HE Qualific     | 0 | 120 | N | Pass        |
| 561459  | F | South West A Level or      | 0 | 120 | N | Distinction |
| 561461  | F | South West Lower Than      | 0 | 120 | N | Pass        |
| 561711  | M | Tigray Region A Level or   | 0 | 60  | N | Fail        |
| 561713  | M | Tigray Region Lower Than   | 0 | 60  | N | Pass        |
| 561715  | M | Tigray Region Lower Than   | 0 | 60  | N | Fail        |
| 561716  | F | Tigray Region Lower Than   | 0 | 60  | N | Pass        |
| 561718  | M | Tigray Region Lower Than   | 0 | 60  | N | Fail        |
| 562146  | F | South Region A Level or    | 0 | 120 | N | Withdrawn   |
| 562465  | F | South Region Lower Than    | 0 | 120 | N | Pass        |
| 562483  | M | Tigray Region A Level or   | 0 | 60  | N | Fail        |
| 562489  | F | Amhara Region HE Qualific  | 0 | 60  | N | Distinction |
| 562494  | M | Tigray Region Lower Than   | 0 | 60  | N | Withdrawn   |
| 562495  | M | Tigray Region A Level or   | 0 | 120 | Y | Fail        |
| 563157  | F | Sidamo Region A Level or   | 0 | 60  | N | Withdrawn   |
| 563330  | M | Sidamo Region A Level or   | 0 | 60  | N | Pass        |
| 563363  | F | Sidamo Region A Level or   | 0 | 120 | N | Pass        |
| 563874  | F | Somalia Region A Level or  | 0 | 120 | N | Distinction |
| 563877  | F | Somalia Region A Level or  | 0 | 60  | N | Pass        |
| 563878  | F | Somalia Region HE Qualific | 0 | 120 | N | Pass        |
| 563879  | F | Somalia Region A Level or  | 0 | 120 | N | Pass        |
| 565870  | F | Amhara Region HE Qualific  | 0 | 60  | N | Fail        |
| 630346  | F | Addis Ababa A Level or     | 0 | 60  | Y | Fail        |
| 1008675 | F | Addis Ababa Lower Than     | 0 | 60  | N | Pass        |
| 1098728 | F | South Region Lower Than    | 0 | 120 | N | Fail        |
| 1413989 | F | Afar Region HE Qualific    | 2 | 60  | N | Withdrawn   |
| 1436591 | M | Afar Region A Level or     | 0 | 60  | Y | Distinction |

|         |   |                          |   |     |   |             |
|---------|---|--------------------------|---|-----|---|-------------|
| 1480800 | F | Addis Abat Lower Tha     | 0 | 60  | N | Pass        |
| 1493476 | M | Tigrai Regi HE Qualific  | 0 | 60  | N | Pass        |
| 1521540 | F | South Regi A Level or I  | 2 | 60  | N | Distinction |
| 1536591 | F | Sidamo Re Lower Tha      | 0 | 60  | N | Withdrawn   |
| 1574398 | F | Afar Regi A Level or I   | 0 | 90  | N | Distinction |
| 1659662 | F | Sidamo Re A Level or I   | 0 | 60  | N | Pass        |
| 1678401 | F | Somalia Re Lower Tha     | 1 | 180 | N | Pass        |
| 1721462 | F | Addis Abat Lower Tha     | 1 | 60  | Y | Pass        |
| 1728437 | F | South Regi A Level or I  | 0 | 120 | N | Pass        |
| 1730702 | F | Amhara Re Lower Tha      | 0 | 60  | N | Withdrawn   |
| 1747892 | F | South Wes Lower Tha      | 1 | 210 | N | Distinction |
| 1753965 | M | Oromia Re A Level or I   | 1 | 60  | N | Pass        |
| 1770733 | F | Tigrai Regi HE Qualific  | 0 | 120 | N | Pass        |
| 1771053 | F | South Regi Lower Tha     | 0 | 60  | N | Withdrawn   |
| 1776925 | M | Sidamo Re HE Qualific    | 1 | 120 | N | Fail        |
| 1789199 | F | Sidamo Re Lower Tha      | 1 | 120 | N | Pass        |
| 1797614 | M | South Regi HE Qualific   | 1 | 120 | N | Distinction |
| 1847146 | F | Sidamo Re Lower Tha      | 0 | 120 | N | Pass        |
| 1858523 | F | Oromia Re A Level or I   | 0 | 60  | N | Withdrawn   |
| 1903527 | F | Addis Abat Lower Tha     | 1 | 120 | N | Distinction |
| 1904710 | F | Sidamo Re Lower Tha      | 0 | 60  | Y | Withdrawn   |
| 1912438 | F | South Wes Lower Tha      | 0 | 60  | N | Pass        |
| 1923618 | F | Oromia Re HE Qualific    | 0 | 60  | N | Distinction |
| 1930254 | F | Sidamo Re A Level or I   | 1 | 60  | N | Fail        |
| 1930367 | F | Somalia Re A Level or I  | 0 | 90  | N | Distinction |
| 1937864 | F | Afar Regi A Level or I   | 1 | 120 | N | Pass        |
| 1971393 | F | South Regi Lower Tha     | 0 | 60  | N | Pass        |
| 1993672 | F | South Regi Lower Tha     | 3 | 60  | Y | Withdrawn   |
| 1996746 | F | Amhara Re Lower Tha      | 3 | 120 | N | Withdrawn   |
| 1997796 | F | North Regi A Level or I  | 0 | 60  | N | Distinction |
| 2019837 | F | Amhara Re A Level or I   | 0 | 60  | N | Withdrawn   |
| 2023366 | F | Oromia Re Lower Tha      | 0 | 120 | N | Pass        |
| 2034350 | M | Sidamo Re A Level or I   | 0 | 150 | N | Withdrawn   |
| 2035022 | F | Sidamo Re Lower Tha      | 3 | 120 | Y | Pass        |
| 2076177 | F | Sidamo Re HE Qualific    | 0 | 60  | N | Withdrawn   |
| 2092834 | F | South Regi A Level or I  | 0 | 90  | N | Pass        |
| 2097916 | F | Sidamo Re A Level or I   | 0 | 60  | N | Distinction |
| 2132811 | F | South Regi Lower Tha     | 0 | 60  | Y | Pass        |
| 2173572 | F | Amhara Re Lower Tha      | 0 | 90  | N | Pass        |
| 2205383 | F | Amhara Re A Level or I   | 0 | 90  | N | Fail        |
| 2210318 | M | Tigrai Regi A Level or I | 0 | 60  | N | Distinction |
| 2216178 | F | Addis Abat HE Qualific   | 0 | 60  | N | Fail        |
| 2231614 | F | South Regi A Level or I  | 0 | 120 | Y | Distinction |
| 2236738 | M | Afar Regi HE Qualific    | 0 | 120 | N | Distinction |
| 2243551 | F | Addis Abat Lower Tha     | 1 | 120 | N | Fail        |
| 2244724 | F | Addis Abat A Level or I  | 0 | 60  | N | Fail        |
| 2249372 | F | South Regi A Level or I  | 0 | 120 | N | Pass        |

|         |   |                         |   |     |   |             |
|---------|---|-------------------------|---|-----|---|-------------|
| 2254619 | F | Addis Abat A Level or I | 0 | 60  | N | Pass        |
| 2265234 | F | South Wes Lower Tha     | 0 | 120 | N | Withdrawn   |
| 2269480 | F | Addis Abat A Level or I | 0 | 60  | N | Distinction |
| 2273828 | F | Amhara Re A Level or I  | 0 | 60  | N | Withdrawn   |
| 2279538 | F | South Wes A Level or I  | 2 | 60  | N | Fail        |
| 2280038 | M | Sidamo Re Lower Tha     | 2 | 60  | N | Fail        |
| 2287671 | F | Amhara Re A Level or I  | 0 | 120 | Y | Withdrawn   |
| 2288607 | F | Oromia Re Lower Tha     | 2 | 120 | N | Distinction |
| 2290090 | F | Oromia Re Lower Tha     | 0 | 60  | N | Pass        |
| 2291598 | F | South Regi A Level or I | 0 | 90  | Y | Pass        |
| 2293443 | F | Oromia Re Lower Tha     | 1 | 120 | Y | Distinction |
| 2296749 | F | South Regi Lower Tha    | 0 | 60  | N | Pass        |
| 2300911 | F | South Wes Lower Tha     | 0 | 60  | N | Withdrawn   |
| 2301111 | F | Afar Regio HE Qualific  | 1 | 60  | N | Withdrawn   |
| 2302925 | F | Addis Abat A Level or I | 0 | 60  | N | Withdrawn   |
| 2303034 | F | South Wes A Level or I  | 1 | 60  | Y | Fail        |
| 2303848 | M | South Wes Lower Tha     | 1 | 60  | N | Withdrawn   |
| 2308528 | M | Afar Regio A Level or I | 0 | 60  | N | Pass        |
| 2322046 | F | South Regi HE Qualific  | 1 | 60  | Y | Withdrawn   |
| 2322342 | F | South Wes HE Qualific   | 0 | 120 | N | Distinction |
| 2327072 | F | Tigrai Regi HE Qualific | 0 | 120 | N | Pass        |
| 2336550 | F | South Regi HE Qualific  | 0 | 120 | N | Pass        |
| 2340190 | F | Sidamo Re Lower Tha     | 5 | 120 | N | Fail        |
| 2366070 | F | Oromia Re HE Qualific   | 0 | 240 | N | Withdrawn   |
| 2375144 | F | Addis Abat Lower Tha    | 0 | 90  | N | Withdrawn   |
| 2376628 | F | South Regi A Level or I | 0 | 120 | N | Pass        |
| 2377567 | F | South Wes HE Qualific   | 0 | 60  | N | Distinction |
| 2380539 | F | Somalia Re No Formal    | 0 | 60  | N | Pass        |
| 2384819 | F | Afar Regio HE Qualific  | 0 | 120 | N | Distinction |
| 2394212 | F | South Wes HE Qualific   | 0 | 90  | N | Withdrawn   |
| 2395222 | F | Tigrai Regi HE Qualific | 0 | 60  | N | Fail        |
| 2399361 | F | Afar Regio A Level or I | 1 | 120 | N | Withdrawn   |
| 2415962 | M | Afar Regio A Level or I | 0 | 120 | Y | Withdrawn   |
| 2418877 | F | South Wes Lower Tha     | 1 | 60  | Y | Withdrawn   |
| 2422639 | F | North Regi Lower Tha    | 0 | 120 | N | Withdrawn   |
| 2423078 | M | Sidamo Re A Level or I  | 1 | 180 | N | Withdrawn   |
| 2425333 | F | Afar Regio A Level or I | 0 | 60  | Y | Fail        |
| 2425726 | F | Addis Abat Lower Tha    | 0 | 60  | N | Withdrawn   |
| 2439201 | F | North Regi Lower Tha    | 0 | 60  | N | Pass        |
| 2442685 | M | Addis Abat Lower Tha    | 1 | 120 | N | Pass        |
| 2444088 | F | South Wes Lower Tha     | 0 | 60  | N | Distinction |
| 2444102 | F | Oromia Re HE Qualific   | 0 | 60  | N | Withdrawn   |
| 2444703 | F | South Regi Lower Tha    | 2 | 120 | N | Fail        |
| 2445088 | M | Sidamo Re Lower Tha     | 0 | 60  | N | Withdrawn   |
| 2445949 | M | Addis Abat Lower Tha    | 2 | 60  | N | Fail        |
| 2446144 | F | South Wes A Level or I  | 0 | 60  | N | Pass        |
| 2458984 | F | Somalia Re A Level or I | 0 | 60  | Y | Pass        |

|         |   |                           |   |     |   |             |
|---------|---|---------------------------|---|-----|---|-------------|
| 2464963 | F | Sidamo Re A Level or I    | 0 | 60  | N | Pass        |
| 2466123 | F | Amhara Re Lower Tha       | 0 | 60  | Y | Withdrawn   |
| 2470672 | F | South Regi A Level or I   | 1 | 60  | N | Fail        |
| 2474493 | F | Oromia Re A Level or I    | 0 | 120 | N | Pass        |
| 2475034 | F | South Wes Lower Tha       | 0 | 60  | N | Withdrawn   |
| 2475780 | F | Afar Regio Lower Tha      | 4 | 120 | N | Pass        |
| 2476649 | F | Oromia Re Lower Tha       | 1 | 60  | N | Pass        |
| 2480865 | F | South Regi A Level or I   | 0 | 120 | N | Withdrawn   |
| 2481224 | M | Sidamo Re Lower Tha       | 0 | 120 | Y | Pass        |
| 2481765 | F | Oromia Re A Level or I    | 0 | 60  | N | Pass        |
| 2483179 | F | Tigrai Regio Lower Tha    | 0 | 60  | N | Distinction |
| 2483568 | F | Oromia Re A Level or I    | 0 | 120 | N | Pass        |
| 2487541 | F | Sidamo Re HE Qualific     | 0 | 60  | N | Distinction |
| 2498182 | M | Somalia Re A Level or I   | 0 | 60  | N | Fail        |
| 2498299 | F | Tigrai Regio A Level or I | 1 | 120 | N | Distinction |
| 2512392 | F | Tigrai Regio Lower Tha    | 0 | 120 | N | Withdrawn   |
| 2517864 | F | South Wes HE Qualific     | 0 | 210 | N | Pass        |
| 2518653 | F | Tigrai Regio A Level or I | 0 | 120 | N | Distinction |
| 2521745 | F | Sidamo Re Lower Tha       | 0 | 60  | N | Fail        |
| 2522093 | F | Afar Regio HE Qualific    | 0 | 120 | N | Distinction |
| 2524127 | F | Addis Abak Lower Tha      | 2 | 120 | N | Pass        |
| 2528352 | F | South Regi Lower Tha      | 1 | 60  | N | Withdrawn   |
| 2528966 | F | Amhara Re A Level or I    | 1 | 120 | Y | Pass        |
| 2531031 | F | Addis Abak Lower Tha      | 0 | 120 | N | Pass        |
| 2534033 | M | South Regi A Level or I   | 1 | 60  | Y | Withdrawn   |
| 2535788 | F | Sidamo Re A Level or I    | 2 | 60  | N | Fail        |
| 2540362 | F | Amhara Re HE Qualific     | 0 | 120 | N | Fail        |
| 2540746 | F | South Regi Lower Tha      | 0 | 60  | N | Withdrawn   |
| 2541120 | F | South Regi A Level or I   | 0 | 60  | N | Distinction |
| 2553749 | F | Amhara Re No Formal       | 1 | 60  | N | Withdrawn   |
| 2560219 | F | Addis Abak Lower Tha      | 0 | 90  | N | Fail        |
| 2568958 | F | Afar Regio Lower Tha      | 0 | 60  | N | Fail        |
| 2569163 | F | Sidamo Re HE Qualific     | 0 | 120 | N | Distinction |
| 2570633 | F | Sidamo Re Lower Tha       | 0 | 240 | N | Withdrawn   |
| 2571447 | F | South Wes Lower Tha       | 0 | 60  | N | Fail        |
| 2572118 | F | Sidamo Re Lower Tha       | 0 | 150 | N | Fail        |
| 2575914 | F | North Regi Lower Tha      | 3 | 60  | Y | Withdrawn   |
| 2578041 | F | Sidamo Re A Level or I    | 0 | 300 | N | Withdrawn   |
| 2578567 | F | Somalia Re Lower Tha      | 0 | 60  | N | Fail        |
| 2579459 | F | South Wes Lower Tha       | 0 | 60  | N | Distinction |
| 2580439 | F | Tigrai Regio HE Qualific  | 0 | 120 | N | Pass        |
| 2581528 | F | Oromia Re Lower Tha       | 0 | 120 | N | Pass        |
| 2587260 | F | South Wes HE Qualific     | 1 | 120 | N | Withdrawn   |
| 2591421 | F | Sidamo Re A Level or I    | 0 | 90  | N | Withdrawn   |
| 2597027 | F | South Wes A Level or I    | 0 | 60  | N | Withdrawn   |
| 2598220 | F | Sidamo Re A Level or I    | 0 | 120 | N | Fail        |
| 2602809 | F | North Regi Lower Tha      | 0 | 60  | N | Pass        |

|         |   |                             |   |     |   |             |
|---------|---|-----------------------------|---|-----|---|-------------|
| 2608235 | F | Addis Abat A Level or I     | 0 | 60  | N | Pass        |
| 2608453 | F | Afar Region Lower Than      | 5 | 120 | N | Fail        |
| 2612483 | F | South Region A Level or I   | 0 | 60  | N | Distinction |
| 2616787 | F | Somalia Region A Level or I | 0 | 90  | Y | Pass        |
| 2617596 | F | Somalia Region HE Qualific  | 0 | 120 | N | Distinction |
| 2617650 | F | Oromia Region Lower Than    | 1 | 120 | N | Withdrawn   |
| 2617999 | F | Amhara Region Lower Than    | 0 | 180 | N | Pass        |
| 2620178 | M | South Region Lower Than     | 0 | 60  | N | Distinction |
| 2622465 | M | Sidamo Region Lower Than    | 0 | 60  | N | Pass        |
| 2626410 | F | Tigray Region A Level or I  | 0 | 60  | N | Withdrawn   |
| 2635505 | F | South Region Lower Than     | 1 | 120 | N | Pass        |
| 2635829 | F | Afar Region HE Qualific     | 0 | 60  | N | Distinction |
| 2639611 | F | Tigray Region A Level or I  | 0 | 120 | N | Pass        |
| 2641393 | F | Somalia Region HE Qualific  | 0 | 120 | N | Pass        |
| 2642029 | F | South Region HE Qualific    | 0 | 120 | N | Distinction |
| 2645061 | F | Oromia Region Lower Than    | 1 | 180 | N | Pass        |
| 2649947 | F | Sidamo Region A Level or I  | 1 | 120 | N | Pass        |
| 2654302 | M | South Region A Level or I   | 1 | 120 | N | Pass        |
| 2654411 | M | Addis Abat Lower Than       | 0 | 120 | N | Fail        |
| 2664301 | F | South West A Level or I     | 0 | 120 | N | Fail        |
| 2680770 | F | South Region No Formal      | 0 | 60  | N | Withdrawn   |
| 2685831 | F | Tigray Region No Formal     | 0 | 60  | N | Pass        |
| 2692381 | F | Amhara Region Lower Than    | 3 | 180 | N | Withdrawn   |
| 2692384 | M | Afar Region Lower Than      | 0 | 60  | N | Pass        |
| 2693974 | F | South West HE Qualific      | 0 | 60  | N | Withdrawn   |
| 23632   | F | Addis Abat A Level or I     | 0 | 60  | N | Withdrawn   |
| 23798   | M | Tigray Region A Level or I  | 0 | 60  | N | Distinction |
| 25629   | F | Afar Region Lower Than      | 0 | 120 | N | Withdrawn   |
| 26677   | M | South Region A Level or I   | 4 | 60  | N | Withdrawn   |
| 27457   | F | Oromia Region Lower Than    | 0 | 60  | N | Withdrawn   |
| 27759   | M | Amhara Region Lower Than    | 0 | 120 | Y | Fail        |
| 30091   | F | South West A Level or I     | 0 | 60  | Y | Pass        |
| 31014   | F | South Region Lower Than     | 0 | 120 | N | Withdrawn   |
| 31849   | F | South West Lower Than       | 0 | 120 | N | Pass        |
| 37622   | F | Afar Region HE Qualific     | 1 | 120 | N | Pass        |
| 38234   | F | Somalia Region A Level or I | 0 | 60  | N | Fail        |
| 47855   | F | Afar Region Lower Than      | 3 | 300 | N | Withdrawn   |
| 48040   | F | Somalia Region A Level or I | 0 | 120 | N | Pass        |
| 48503   | F | South Region Lower Than     | 0 | 60  | N | Pass        |
| 51301   | F | Tigray Region Lower Than    | 2 | 60  | Y | Withdrawn   |
| 52797   | F | South West Lower Than       | 1 | 60  | N | Pass        |
| 52899   | F | Somalia Region Lower Than   | 1 | 90  | N | Pass        |
| 53360   | F | Amhara Region Lower Than    | 1 | 120 | N | Withdrawn   |
| 54388   | M | Addis Abat Lower Than       | 3 | 75  | N | Withdrawn   |
| 55026   | F | Sidamo Region A Level or I  | 0 | 60  | Y | Pass        |
| 56340   | F | South Region Lower Than     | 0 | 60  | N | Fail        |
| 56789   | F | Oromia Region A Level or I  | 1 | 60  | N | Pass        |

|        |   |                          |   |     |   |             |
|--------|---|--------------------------|---|-----|---|-------------|
| 57079  | F | Sidamo Re Lower Tha      | 0 | 60  | N | Fail        |
| 57369  | M | South Wes Lower Tha      | 0 | 60  | N | Withdrawn   |
| 61118  | F | Sidamo Re A Level or I   | 0 | 180 | N | Withdrawn   |
| 63044  | F | Sidamo Re Lower Tha      | 1 | 120 | N | Fail        |
| 64246  | F | Oromia Re Lower Tha      | 0 | 120 | N | Withdrawn   |
| 65807  | F | Amhara Re HE Qualific    | 1 | 120 | N | Withdrawn   |
| 67863  | F | Sidamo Re Lower Tha      | 1 | 60  | N | Withdrawn   |
| 68556  | F | Oromia Re HE Qualific    | 0 | 60  | N | Fail        |
| 69843  | F | South Wes A Level or I   | 1 | 60  | N | Withdrawn   |
| 72057  | F | Sidamo Re A Level or I   | 0 | 120 | N | Withdrawn   |
| 73489  | F | South Regi HE Qualific   | 0 | 120 | N | Pass        |
| 74169  | M | Addis Abak A Level or I  | 0 | 60  | N | Withdrawn   |
| 74585  | F | Tigrai Regi A Level or I | 0 | 60  | N | Distinction |
| 78255  | F | North Regi Lower Tha     | 1 | 120 | N | Withdrawn   |
| 80717  | F | South Wes Lower Tha      | 0 | 60  | N | Distinction |
| 84812  | F | Addis Abak A Level or I  | 0 | 120 | N | Pass        |
| 86291  | F | Tigrai Regi HE Qualific  | 1 | 60  | N | Fail        |
| 90243  | F | Tigrai Regi HE Qualific  | 0 | 60  | N | Pass        |
| 96475  | M | Oromia Re Lower Tha      | 0 | 180 | N | Pass        |
| 97567  | F | Tigrai Regi HE Qualific  | 0 | 60  | N | Pass        |
| 98268  | F | Afar Regi HE Qualific    | 0 | 60  | N | Pass        |
| 98720  | F | Sidamo Re Lower Tha      | 0 | 60  | Y | Pass        |
| 100282 | F | Tigrai Regi Lower Tha    | 1 | 120 | N | Withdrawn   |
| 105527 | F | Afar Regi HE Qualific    | 0 | 120 | N | Pass        |
| 105851 | F | South Regi A Level or I  | 0 | 60  | Y | Pass        |
| 105883 | F | Amhara Re A Level or I   | 0 | 60  | N | Pass        |
| 106588 | F | Afar Regi A Level or I   | 0 | 60  | N | Distinction |
| 108118 | F | South Regi A Level or I  | 0 | 60  | N | Pass        |
| 108760 | F | Sidamo Re Lower Tha      | 3 | 60  | N | Fail        |
| 109372 | F | South Wes Lower Tha      | 0 | 60  | N | Pass        |
| 109782 | F | Afar Regi A Level or I   | 0 | 60  | N | Withdrawn   |
| 111942 | F | South Wes A Level or I   | 0 | 120 | N | Pass        |
| 119898 | F | South Regi Lower Tha     | 2 | 60  | N | Pass        |
| 123716 | M | North Regi Lower Tha     | 0 | 90  | N | Pass        |
| 124909 | M | Sidamo Re Lower Tha      | 0 | 60  | N | Pass        |
| 125874 | F | Oromia Re Lower Tha      | 0 | 60  | Y | Withdrawn   |
| 128386 | M | South Regi Lower Tha     | 0 | 60  | N | Fail        |
| 128889 | F | South Regi A Level or I  | 1 | 120 | N | Pass        |
| 131051 | F | Afar Regi Lower Tha      | 3 | 60  | N | Pass        |
| 132626 | F | South Regi A Level or I  | 0 | 60  | N | Withdrawn   |
| 133269 | F | South Regi Lower Tha     | 0 | 60  | Y | Withdrawn   |
| 134563 | F | Afar Regi Lower Tha      | 2 | 60  | N | Pass        |
| 138289 | F | Somalia Re Lower Tha     | 0 | 60  | N | Fail        |
| 138920 | F | Tigrai Regi Lower Tha    | 1 | 60  | N | Fail        |
| 139549 | F | Afar Regi Lower Tha      | 1 | 60  | Y | Pass        |
| 141949 | F | Addis Abak Lower Tha     | 1 | 60  | N | Pass        |
| 146165 | F | Tigrai Regi A Level or I | 0 | 60  | N | Pass        |

|        |   |                          |   |     |   |             |
|--------|---|--------------------------|---|-----|---|-------------|
| 146600 | F | South Wes Lower Tha      | 0 | 120 | N | Pass        |
| 151800 | F | Tigrai Regi Lower Tha    | 0 | 60  | N | Fail        |
| 151917 | F | South Regi A Level or I  | 3 | 60  | N | Fail        |
| 152867 | F | South Regi A Level or I  | 2 | 60  | Y | Withdrawn   |
| 153704 | F | South Regi Lower Tha     | 2 | 60  | N | Fail        |
| 154011 | F | Oromia Re A Level or I   | 0 | 60  | N | Pass        |
| 154570 | F | Afar Regi Lower Tha      | 1 | 60  | N | Withdrawn   |
| 156311 | F | Sidamo Re A Level or I   | 0 | 60  | N | Pass        |
| 156788 | M | Somalia Re Lower Tha     | 0 | 180 | N | Withdrawn   |
| 157060 | F | Somalia Re Lower Tha     | 0 | 60  | N | Pass        |
| 157795 | M | Sidamo Re Lower Tha      | 1 | 60  | N | Pass        |
| 161491 | F | Afar Regi A Level or I   | 0 | 120 | N | Distinction |
| 162646 | F | Afar Regi Lower Tha      | 1 | 60  | N | Fail        |
| 165823 | F | Sidamo Re Lower Tha      | 0 | 60  | N | Withdrawn   |
| 169213 | F | Sidamo Re A Level or I   | 1 | 60  | N | Pass        |
| 174222 | F | South Wes Lower Tha      | 0 | 60  | N | Pass        |
| 174440 | F | Tigrai Regi Lower Tha    | 0 | 60  | N | Fail        |
| 174487 | F | South Regi Lower Tha     | 1 | 60  | N | Pass        |
| 178738 | F | Addis Abak HE Qualific   | 1 | 60  | N | Fail        |
| 178963 | M | South Wes A Level or I   | 0 | 120 | Y | Pass        |
| 179254 | F | Oromia Re Lower Tha      | 1 | 60  | N | Fail        |
| 182661 | F | South Regi Lower Tha     | 3 | 60  | N | Pass        |
| 184236 | M | Amhara Re Lower Tha      | 0 | 60  | Y | Withdrawn   |
| 184897 | F | South Regi Lower Tha     | 0 | 60  | N | Withdrawn   |
| 185597 | F | Addis Abak Lower Tha     | 0 | 90  | N | Withdrawn   |
| 188026 | F | Tigrai Regi HE Qualific  | 1 | 120 | N | Fail        |
| 189095 | F | Afar Regi Lower Tha      | 1 | 60  | N | Fail        |
| 191269 | F | Addis Abak Lower Tha     | 0 | 60  | N | Pass        |
| 193215 | F | Oromia Re A Level or I   | 0 | 120 | N | Fail        |
| 195096 | F | Tigrai Regi A Level or I | 0 | 60  | N | Pass        |
| 195938 | F | South Regi A Level or I  | 1 | 60  | N | Distinction |
| 197240 | F | Sidamo Re A Level or I   | 1 | 150 | N | Pass        |
| 197412 | F | Amhara Re A Level or I   | 0 | 60  | N | Pass        |
| 197759 | F | Oromia Re A Level or I   | 0 | 60  | N | Pass        |
| 198339 | F | South Regi Lower Tha     | 1 | 60  | Y | Withdrawn   |
| 199029 | F | South Regi No Formal     | 0 | 60  | N | Distinction |
| 199663 | M | Sidamo Re Post Gradu     | 0 | 60  | N | Pass        |
| 202879 | F | Addis Abak Lower Tha     | 1 | 60  | N | Fail        |
| 203640 | M | Sidamo Re Lower Tha      | 0 | 60  | N | Pass        |
| 205788 | F | Addis Abak Lower Tha     | 0 | 120 | Y | Pass        |
| 227416 | M | Oromia Re A Level or I   | 0 | 60  | N | Fail        |
| 228243 | M | Sidamo Re A Level or I   | 0 | 120 | N | Withdrawn   |
| 228513 | F | South Wes HE Qualific    | 2 | 180 | N | Withdrawn   |
| 230081 | F | Somalia Re A Level or I  | 0 | 120 | N | Pass        |
| 231959 | F | North Regi Lower Tha     | 1 | 180 | N | Withdrawn   |
| 233102 | F | Oromia Re Lower Tha      | 0 | 240 | N | Withdrawn   |
| 233317 | F | Sidamo Re HE Qualific    | 1 | 60  | N | Pass        |



|        |   |                          |   |     |   |             |
|--------|---|--------------------------|---|-----|---|-------------|
| 233752 | F | Amhara Re Lower Tha      | 0 | 60  | N | Pass        |
| 233957 | F | South Regi A Level or I  | 0 | 60  | N | Fail        |
| 234929 | F | Tigrai Regi HE Qualific  | 1 | 60  | N | Fail        |
| 235258 | F | Afar Regio HE Qualific   | 0 | 210 | Y | Withdrawn   |
| 235428 | M | Sidamo Re Lower Tha      | 0 | 150 | N | Withdrawn   |
| 238825 | F | Addis Abak A Level or I  | 0 | 60  | N | Withdrawn   |
| 240993 | F | Somalia Re A Level or I  | 0 | 60  | Y | Pass        |
| 241338 | F | South Wes Lower Tha      | 0 | 120 | N | Fail        |
| 242149 | F | Amhara Re Lower Tha      | 1 | 120 | N | Fail        |
| 242893 | F | Sidamo Re No Formal      | 1 | 60  | N | Withdrawn   |
| 243047 | M | Sidamo Re HE Qualific    | 0 | 120 | N | Withdrawn   |
| 243851 | F | Somalia Re A Level or I  | 0 | 60  | Y | Pass        |
| 243909 | F | South Wes Lower Tha      | 0 | 60  | N | Fail        |
| 243992 | F | South Regi HE Qualific   | 0 | 60  | N | Pass        |
| 244917 | F | Sidamo Re Lower Tha      | 0 | 60  | N | Withdrawn   |
| 245987 | F | South Regi A Level or I  | 1 | 60  | Y | Pass        |
| 247902 | F | South Regi Lower Tha     | 2 | 120 | N | Pass        |
| 248653 | M | Sidamo Re A Level or I   | 0 | 120 | N | Distinction |
| 248716 | F | North Regi HE Qualific   | 0 | 60  | N | Pass        |
| 248800 | F | South Regi Lower Tha     | 2 | 60  | Y | Withdrawn   |
| 251815 | F | Tigrai Regi Lower Tha    | 1 | 90  | Y | Fail        |
| 252257 | F | Somalia Re A Level or I  | 0 | 60  | N | Pass        |
| 252652 | F | Sidamo Re A Level or I   | 1 | 120 | N | Withdrawn   |
| 253577 | F | Afar Regio HE Qualific   | 0 | 60  | N | Pass        |
| 256998 | F | Somalia Re Lower Tha     | 1 | 60  | N | Pass        |
| 258035 | F | Amhara Re HE Qualific    | 0 | 60  | N | Distinction |
| 259182 | M | Somalia Re Lower Tha     | 2 | 120 | N | Withdrawn   |
| 260179 | F | Afar Regio Lower Tha     | 1 | 60  | N | Pass        |
| 261332 | M | Amhara Re Lower Tha      | 0 | 60  | Y | Fail        |
| 261466 | F | Sidamo Re A Level or I   | 0 | 60  | N | Pass        |
| 262639 | F | Sidamo Re Lower Tha      | 0 | 60  | N | Pass        |
| 264152 | F | Tigrai Regi A Level or I | 1 | 120 | N | Pass        |
| 264744 | F | South Regi A Level or I  | 0 | 120 | N | Pass        |
| 264842 | F | South Wes Lower Tha      | 0 | 120 | Y | Withdrawn   |
| 265170 | F | Tigrai Regi A Level or I | 0 | 60  | N | Fail        |
| 266331 | F | Afar Regio A Level or I  | 0 | 90  | N | Distinction |
| 266564 | F | South Regi A Level or I  | 0 | 120 | N | Pass        |
| 266744 | F | South Wes A Level or I   | 0 | 240 | N | Withdrawn   |
| 268589 | F | Sidamo Re A Level or I   | 0 | 90  | Y | Pass        |
| 269082 | F | Oromia Re HE Qualific    | 2 | 60  | N | Distinction |
| 269204 | F | South Regi Lower Tha     | 0 | 60  | N | Pass        |
| 270646 | F | Addis Abak Lower Tha     | 0 | 90  | N | Pass        |
| 271346 | F | Addis Abak A Level or I  | 1 | 150 | N | Withdrawn   |
| 272172 | F | Amhara Re A Level or I   | 1 | 60  | N | Fail        |
| 272617 | F | Somalia Re Lower Tha     | 2 | 60  | Y | Withdrawn   |
| 274247 | F | South Regi Lower Tha     | 1 | 60  | Y | Fail        |
| 274577 | F | South Wes Lower Tha      | 1 | 60  | N | Withdrawn   |

|        |   |                          |   |     |   |             |
|--------|---|--------------------------|---|-----|---|-------------|
| 274971 | F | South Wes Lower Thai     | 0 | 75  | N | Pass        |
| 276925 | F | Tigrai Regi A Level or I | 0 | 60  | N | Withdrawn   |
| 277537 | M | Amhara Re Lower Thai     | 0 | 60  | N | Fail        |
| 277812 | F | Oromia Re HE Qualific    | 0 | 60  | N | Distinction |
| 278272 | M | Addis Abak HE Qualific   | 1 | 120 | N | Fail        |
| 278773 | F | Somalia Re A Level or I  | 0 | 120 | N | Withdrawn   |
| 278794 | F | South Wes A Level or I   | 1 | 60  | Y | Pass        |
| 280140 | F | Afar Regi Lower Thai     | 2 | 60  | Y | Fail        |
| 280151 | F | Sidamo Re A Level or I   | 0 | 210 | Y | Fail        |
| 280439 | F | Sidamo Re A Level or I   | 0 | 120 | N | Withdrawn   |
| 282038 | F | Amhara Re Lower Thai     | 0 | 120 | N | Withdrawn   |
| 282785 | F | South Wes Lower Thai     | 1 | 60  | N | Withdrawn   |
| 284906 | F | Somalia Re A Level or I  | 2 | 60  | N | Pass        |
| 285050 | M | Amhara Re HE Qualific    | 1 | 180 | N | Fail        |
| 286402 | F | Sidamo Re A Level or I   | 0 | 60  | N | Distinction |
| 286690 | F | Tigrai Regi Lower Thai   | 2 | 60  | N | Fail        |
| 287107 | F | Amhara Re A Level or I   | 0 | 60  | N | Distinction |
| 287309 | F | South Wes Lower Thai     | 2 | 120 | N | Pass        |
| 287679 | F | Tigrai Regi A Level or I | 0 | 60  | N | Pass        |
| 289753 | F | South Regi A Level or I  | 0 | 210 | Y | Withdrawn   |
| 289965 | F | Tigrai Regi A Level or I | 1 | 60  | N | Fail        |
| 290089 | M | Sidamo Re Lower Thai     | 0 | 120 | N | Distinction |
| 291544 | F | Oromia Re Lower Thai     | 0 | 60  | Y | Distinction |
| 292537 | F | South Regi Lower Thai    | 0 | 60  | N | Pass        |
| 293712 | F | Somalia Re A Level or I  | 0 | 60  | N | Distinction |
| 293754 | M | North Regi Lower Thai    | 0 | 60  | N | Distinction |
| 293760 | F | South Wes Lower Thai     | 1 | 120 | N | Pass        |
| 299561 | F | South Regi A Level or I  | 2 | 60  | Y | Withdrawn   |
| 301583 | F | Sidamo Re A Level or I   | 1 | 60  | N | Fail        |
| 301987 | F | South Regi A Level or I  | 0 | 60  | N | Pass        |
| 303331 | F | Addis Abak Lower Thai    | 3 | 60  | N | Withdrawn   |
| 303617 | F | Tigrai Regi Lower Thai   | 0 | 60  | N | Fail        |
| 304069 | F | Oromia Re A Level or I   | 0 | 90  | N | Withdrawn   |
| 304795 | F | Somalia Re Lower Thai    | 3 | 120 | N | Withdrawn   |
| 305173 | M | Tigrai Regi Lower Thai   | 2 | 60  | N | Fail        |
| 305547 | F | Sidamo Re Lower Thai     | 2 | 120 | N | Withdrawn   |
| 305812 | F | Addis Abak Lower Thai    | 1 | 60  | N | Withdrawn   |
| 305935 | F | Oromia Re HE Qualific    | 1 | 180 | N | Fail        |
| 306964 | F | Afar Regi Lower Thai     | 0 | 60  | Y | Pass        |
| 307193 | M | Tigrai Regi Lower Thai   | 0 | 60  | N | Fail        |
| 307230 | F | Tigrai Regi Lower Thai   | 0 | 60  | N | Withdrawn   |
| 308359 | F | Somalia Re Lower Thai    | 1 | 60  | N | Withdrawn   |
| 308509 | F | Sidamo Re Lower Thai     | 0 | 120 | N | Fail        |
| 308703 | F | Tigrai Regi HE Qualific  | 0 | 60  | N | Withdrawn   |
| 308852 | F | South Wes A Level or I   | 0 | 60  | N | Withdrawn   |
| 310125 | F | Addis Abak Lower Thai    | 0 | 60  | N | Withdrawn   |
| 310933 | F | Tigrai Regi Lower Thai   | 1 | 60  | N | Pass        |

|        |   |                         |   |     |   |             |
|--------|---|-------------------------|---|-----|---|-------------|
| 312531 | F | Afar Region A Level or  | 2 | 120 | N | Withdrawn   |
| 314850 | F | Oromia Re A Level or    | 1 | 120 | N | Withdrawn   |
| 315105 | M | Addis Abat A Level or   | 2 | 60  | N | Distinction |
| 316076 | F | South Wes A Level or    | 0 | 60  | Y | Pass        |
| 318848 | F | Oromia Re Lower Than    | 0 | 60  | N | Pass        |
| 319618 | F | Addis Abat A Level or   | 1 | 60  | N | Pass        |
| 320051 | F | Addis Abat Lower Than   | 0 | 120 | N | Pass        |
| 320757 | M | Afar Region Lower Than  | 1 | 60  | N | Pass        |
| 322728 | F | Amhara Re Lower Than    | 1 | 270 | N | Withdrawn   |
| 323090 | F | South Regi HE Qualific  | 0 | 60  | N | Pass        |
| 323606 | F | South Regi A Level or   | 0 | 120 | N | Pass        |
| 324236 | F | Tigray Regi Lower Than  | 1 | 120 | N | Withdrawn   |
| 324319 | F | Afar Region Lower Than  | 3 | 60  | N | Withdrawn   |
| 324614 | F | Amhara Re Lower Than    | 2 | 120 | N | Withdrawn   |
| 325887 | M | Oromia Re Lower Than    | 0 | 60  | Y | Pass        |
| 329030 | M | Addis Abat HE Qualific  | 1 | 60  | N | Fail        |
| 329192 | F | South Wes HE Qualific   | 0 | 90  | N | Distinction |
| 332257 | F | Somalia Re Lower Than   | 1 | 60  | N | Withdrawn   |
| 333117 | F | South Wes A Level or    | 0 | 90  | N | Withdrawn   |
| 333651 | F | Addis Abat A Level or   | 0 | 60  | N | Withdrawn   |
| 335136 | F | Afar Region HE Qualific | 0 | 60  | N | Fail        |
| 335481 | F | Oromia Re HE Qualific   | 3 | 60  | N | Fail        |
| 336478 | F | Sidamo Re Lower Than    | 0 | 60  | N | Pass        |
| 336646 | F | South Wes Lower Than    | 0 | 120 | N | Fail        |
| 337151 | F | Sidamo Re A Level or    | 0 | 60  | N | Pass        |
| 338741 | F | Addis Abat A Level or   | 0 | 120 | N | Pass        |
| 338878 | F | South Regi A Level or   | 2 | 60  | N | Withdrawn   |
| 339494 | M | Oromia Re A Level or    | 0 | 60  | N | Pass        |
| 339608 | F | Addis Abat A Level or   | 1 | 60  | N | Pass        |
| 339656 | F | Sidamo Re A Level or    | 0 | 60  | N | Withdrawn   |
| 340661 | M | Amhara Re A Level or    | 0 | 120 | Y | Withdrawn   |
| 340911 | F | South Wes A Level or    | 0 | 120 | N | Pass        |
| 340965 | F | Oromia Re HE Qualific   | 0 | 60  | N | Pass        |
| 341612 | F | North Regi A Level or   | 1 | 60  | N | Withdrawn   |
| 342678 | F | Sidamo Re A Level or    | 1 | 90  | N | Withdrawn   |
| 342685 | F | Afar Region A Level or  | 0 | 60  | Y | Pass        |
| 344568 | F | South Regi Lower Than   | 0 | 60  | N | Pass        |
| 345083 | F | South Regi A Level or   | 0 | 60  | Y | Withdrawn   |
| 345128 | F | Addis Abat A Level or   | 2 | 90  | N | Fail        |
| 349554 | F | Afar Region HE Qualific | 0 | 60  | N | Pass        |
| 349675 | F | Afar Region HE Qualific | 1 | 60  | N | Fail        |
| 352112 | F | Oromia Re A Level or    | 0 | 60  | N | Pass        |
| 352161 | F | South Wes Lower Than    | 2 | 60  | N | Withdrawn   |
| 352339 | F | Sidamo Re Lower Than    | 0 | 90  | Y | Withdrawn   |
| 352688 | F | South Regi A Level or   | 0 | 210 | N | Pass        |
| 354779 | F | Oromia Re A Level or    | 1 | 60  | N | Pass        |
| 355591 | F | Amhara Re Lower Than    | 1 | 210 | Y | Withdrawn   |

|        |   |                          |   |     |   |             |
|--------|---|--------------------------|---|-----|---|-------------|
| 355692 | M | South Wes A Level or I   | 0 | 60  | N | Withdrawn   |
| 358289 | M | Addis Abak Lower Tha     | 0 | 180 | Y | Withdrawn   |
| 360101 | F | South Regi Lower Tha     | 0 | 60  | N | Withdrawn   |
| 360876 | F | Tigrai Regi A Level or I | 1 | 60  | N | Fail        |
| 361988 | F | Somalia Re Lower Tha     | 0 | 120 | N | Withdrawn   |
| 362907 | F | South Wes Lower Tha      | 2 | 60  | N | Fail        |
| 363151 | M | Amhara Re Lower Tha      | 0 | 655 | Y | Withdrawn   |
| 363711 | F | Amhara Re Lower Tha      | 1 | 60  | N | Withdrawn   |
| 364073 | F | South Wes HE Qualific    | 1 | 120 | N | Distinction |
| 364185 | F | South Regi HE Qualific   | 0 | 120 | N | Withdrawn   |
| 364666 | F | Afar Regio Lower Tha     | 2 | 60  | N | Fail        |
| 364871 | F | South Wes A Level or I   | 0 | 60  | N | Pass        |
| 365060 | F | Amhara Re Lower Tha      | 2 | 120 | N | Withdrawn   |
| 365169 | F | Oromia Re Lower Tha      | 0 | 60  | N | Pass        |
| 365288 | F | South Regi A Level or I  | 0 | 60  | N | Fail        |
| 365631 | F | Oromia Re A Level or I   | 0 | 165 | N | Pass        |
| 366524 | F | South Regi A Level or I  | 0 | 60  | N | Pass        |
| 367433 | F | North Regi Lower Tha     | 0 | 60  | N | Pass        |
| 368077 | F | Tigrai Regi Lower Tha    | 1 | 60  | N | Pass        |
| 369507 | F | Somalia Re Lower Tha     | 0 | 60  | N | Withdrawn   |
| 369986 | F | Tigrai Regi HE Qualific  | 2 | 120 | N | Pass        |
| 370307 | F | Amhara Re A Level or I   | 0 | 150 | Y | Withdrawn   |
| 370859 | F | Sidamo Re A Level or I   | 0 | 180 | N | Pass        |
| 371530 | F | South Wes A Level or I   | 1 | 120 | N | Distinction |
| 371888 | F | Somalia Re Lower Tha     | 0 | 60  | N | Withdrawn   |
| 372172 | F | Somalia Re Lower Tha     | 0 | 60  | N | Fail        |
| 372658 | F | Addis Abak Lower Tha     | 1 | 90  | N | Pass        |
| 373174 | F | South Regi A Level or I  | 1 | 60  | N | Fail        |
| 373269 | F | Sidamo Re A Level or I   | 1 | 90  | N | Fail        |
| 373633 | F | Tigrai Regi Lower Tha    | 2 | 130 | N | Withdrawn   |
| 373807 | F | Addis Abak Lower Tha     | 1 | 60  | N | Fail        |
| 373848 | F | South Wes Lower Tha      | 0 | 60  | N | Pass        |
| 374038 | F | South Regi Lower Tha     | 0 | 60  | N | Fail        |
| 375960 | F | North Regi A Level or I  | 0 | 90  | N | Pass        |
| 378721 | F | Tigrai Regi Lower Tha    | 1 | 60  | N | Withdrawn   |
| 379210 | M | Sidamo Re A Level or I   | 0 | 60  | N | Fail        |
| 379983 | F | Tigrai Regi A Level or I | 1 | 60  | N | Fail        |
| 380205 | F | Addis Abak Lower Tha     | 2 | 60  | N | Fail        |
| 380240 | F | Tigrai Regi A Level or I | 0 | 180 | N | Fail        |
| 381541 | F | Sidamo Re Lower Tha      | 0 | 120 | N | Pass        |
| 381669 | F | Afar Regio HE Qualific   | 0 | 60  | N | Pass        |
| 382575 | M | Addis Abak A Level or I  | 0 | 60  | N | Fail        |
| 382920 | F | Addis Abak Lower Tha     | 0 | 60  | N | Pass        |
| 382979 | F | South Regi A Level or I  | 0 | 90  | N | Distinction |
| 383303 | F | Sidamo Re A Level or I   | 1 | 60  | N | Fail        |
| 383571 | F | Somalia Re A Level or I  | 0 | 120 | N | Distinction |
| 385040 | F | South Regi A Level or I  | 0 | 120 | Y | Fail        |

|        |   |                          |   |     |   |             |
|--------|---|--------------------------|---|-----|---|-------------|
| 385820 | F | Sidamo Re Lower Tha      | 0 | 120 | Y | Pass        |
| 386889 | F | South Regi A Level or I  | 0 | 60  | Y | Pass        |
| 386904 | M | South Regi A Level or I  | 0 | 60  | N | Withdrawn   |
| 387276 | F | Amhara Re Lower Tha      | 2 | 120 | N | Withdrawn   |
| 387378 | F | Somalia Re Lower Tha     | 0 | 60  | N | Withdrawn   |
| 387700 | F | South Wes A Level or I   | 0 | 60  | N | Fail        |
| 388052 | F | Oromia Re Lower Tha      | 0 | 60  | Y | Pass        |
| 388432 | F | Tigrai Regi Lower Tha    | 1 | 70  | N | Fail        |
| 388549 | F | Tigrai Regi A Level or I | 2 | 60  | N | Fail        |
| 388975 | F | Oromia Re A Level or I   | 0 | 120 | N | Fail        |
| 389101 | F | South Regi A Level or I  | 0 | 60  | N | Distinction |
| 389471 | F | Somalia Re Lower Tha     | 2 | 60  | Y | Fail        |
| 390958 | F | Tigrai Regi A Level or I | 0 | 60  | N | Pass        |
| 392060 | F | Afar Regi A Level or I   | 0 | 60  | Y | Distinction |
| 392281 | F | North Regi A Level or I  | 1 | 60  | N | Fail        |
| 393327 | F | Somalia Re A Level or I  | 3 | 60  | Y | Pass        |
| 395073 | F | South Regi Lower Tha     | 1 | 60  | Y | Fail        |
| 395358 | F | South Wes Lower Tha      | 0 | 60  | N | Withdrawn   |
| 395715 | F | Addis Abat A Level or I  | 0 | 120 | N | Withdrawn   |
| 396114 | F | Tigrai Regi A Level or I | 0 | 120 | N | Distinction |
| 396256 | F | Oromia Re Lower Tha      | 1 | 60  | N | Withdrawn   |
| 397590 | F | Sidamo Re A Level or I   | 0 | 60  | Y | Fail        |
| 398067 | F | Sidamo Re A Level or I   | 0 | 60  | N | Distinction |
| 398315 | F | Oromia Re HE Qualific    | 1 | 120 | N | Fail        |
| 398525 | F | Sidamo Re A Level or I   | 2 | 60  | N | Distinction |
| 398891 | M | South Regi A Level or I  | 2 | 60  | N | Pass        |
| 398956 | F | Tigrai Regi Lower Tha    | 0 | 120 | N | Fail        |
| 401319 | F | Sidamo Re Lower Tha      | 0 | 60  | Y | Withdrawn   |
| 402993 | F | Somalia Re A Level or I  | 0 | 60  | N | Pass        |
| 404269 | F | South Wes A Level or I   | 1 | 60  | N | Pass        |
| 404671 | F | South Wes A Level or I   | 0 | 60  | N | Distinction |
| 404708 | F | Sidamo Re A Level or I   | 0 | 60  | N | Pass        |
| 405945 | F | Addis Abat Lower Tha     | 1 | 60  | N | Pass        |
| 408106 | F | Addis Abat A Level or I  | 1 | 90  | N | Fail        |
| 408975 | F | South Wes A Level or I   | 0 | 60  | N | Pass        |
| 409160 | F | Addis Abat Lower Tha     | 0 | 120 | Y | Fail        |
| 409698 | F | Afar Regi Lower Tha      | 0 | 60  | N | Withdrawn   |
| 409930 | F | Addis Abat A Level or I  | 0 | 120 | N | Pass        |
| 409945 | F | Tigrai Regi A Level or I | 0 | 180 | N | Pass        |
| 410052 | F | Sidamo Re A Level or I   | 3 | 60  | N | Pass        |
| 410281 | F | South Wes A Level or I   | 1 | 180 | N | Fail        |
| 410357 | F | South Regi Lower Tha     | 0 | 60  | N | Distinction |
| 410537 | F | South Wes A Level or I   | 0 | 60  | N | Pass        |
| 410842 | F | Afar Regi A Level or I   | 0 | 60  | N | Pass        |
| 411126 | F | Tigrai Regi Lower Tha    | 1 | 60  | N | Fail        |
| 411226 | F | South Wes HE Qualific    | 0 | 120 | N | Withdrawn   |
| 411642 | F | South Regi HE Qualific   | 1 | 60  | N | Pass        |

|        |   |                          |   |     |   |             |
|--------|---|--------------------------|---|-----|---|-------------|
| 413052 | F | North Regi Lower Tha     | 3 | 60  | Y | Withdrawn   |
| 413248 | M | Tigrai Regi HE Qualific  | 0 | 60  | N | Fail        |
| 414028 | F | Afar Regi A Level or I   | 0 | 60  | N | Distinction |
| 414350 | F | Addis Abak Lower Tha     | 1 | 330 | Y | Distinction |
| 414495 | M | Amhara Re A Level or I   | 0 | 90  | N | Distinction |
| 415216 | F | South Wes A Level or I   | 0 | 60  | N | Pass        |
| 415546 | F | South Wes HE Qualific    | 0 | 60  | N | Fail        |
| 415698 | F | Oromia Re A Level or I   | 1 | 120 | N | Withdrawn   |
| 417657 | F | Afar Regi A Level or I   | 0 | 60  | N | Fail        |
| 417677 | F | Addis Abak Lower Tha     | 1 | 60  | N | Withdrawn   |
| 417785 | F | Amhara Re A Level or I   | 1 | 120 | N | Fail        |
| 417967 | F | Sidamo Re A Level or I   | 0 | 120 | N | Withdrawn   |
| 419375 | F | Tigrai Regi Lower Tha    | 0 | 120 | N | Pass        |
| 420163 | F | South Wes HE Qualific    | 0 | 120 | N | Pass        |
| 420724 | F | South Wes Lower Tha      | 1 | 60  | N | Fail        |
| 421018 | F | South Regi HE Qualific   | 0 | 60  | N | Pass        |
| 422223 | F | Oromia Re A Level or I   | 3 | 60  | N | Fail        |
| 422479 | F | Oromia Re Lower Tha      | 1 | 120 | N | Pass        |
| 422505 | F | Sidamo Re Lower Tha      | 1 | 60  | N | Withdrawn   |
| 423399 | M | Tigrai Regi A Level or I | 0 | 210 | N | Pass        |
| 424014 | F | Afar Regi Lower Tha      | 1 | 120 | N | Withdrawn   |
| 424539 | F | South Regi Lower Tha     | 2 | 120 | N | Pass        |
| 424637 | F | South Regi HE Qualific   | 2 | 60  | N | Fail        |
| 425817 | M | Somalia Re Lower Tha     | 1 | 90  | N | Fail        |
| 426458 | F | Tigrai Regi Lower Tha    | 0 | 180 | N | Pass        |
| 427683 | F | Afar Regi Lower Tha      | 0 | 120 | N | Withdrawn   |
| 427921 | F | South Regi Lower Tha     | 0 | 60  | N | Pass        |
| 428323 | F | Tigrai Regi A Level or I | 0 | 120 | N | Pass        |
| 428653 | M | South Regi Lower Tha     | 0 | 120 | N | Pass        |
| 429610 | F | Addis Abak Lower Tha     | 0 | 60  | N | Distinction |
| 430352 | F | Afar Regi Lower Tha      | 0 | 120 | N | Withdrawn   |
| 430392 | F | Oromia Re Lower Tha      | 1 | 60  | N | Pass        |
| 430708 | F | Sidamo Re A Level or I   | 0 | 90  | N | Pass        |
| 431071 | F | South Wes Lower Tha      | 2 | 120 | N | Fail        |
| 432144 | F | Oromia Re A Level or I   | 0 | 60  | N | Pass        |
| 432237 | F | Tigrai Regi HE Qualific  | 0 | 60  | N | Pass        |
| 433280 | F | Tigrai Regi A Level or I | 0 | 120 | N | Pass        |
| 433864 | M | Afar Regi HE Qualific    | 0 | 60  | N | Pass        |
| 434035 | F | Amhara Re Lower Tha      | 2 | 120 | N | Withdrawn   |
| 434397 | F | South Regi A Level or I  | 0 | 120 | N | Pass        |
| 434585 | F | Addis Abak A Level or I  | 0 | 90  | N | Pass        |
| 437030 | F | South Wes Lower Tha      | 0 | 120 | Y | Withdrawn   |
| 438068 | F | Sidamo Re Lower Tha      | 0 | 60  | N | Distinction |
| 438551 | M | Tigrai Regi Lower Tha    | 0 | 60  | N | Pass        |
| 439182 | F | Addis Abak A Level or I  | 0 | 60  | N | Pass        |
| 439294 | F | South Regi Lower Tha     | 3 | 60  | N | Fail        |
| 439684 | F | Sidamo Re A Level or I   | 1 | 60  | N | Withdrawn   |

|        |   |                          |   |     |   |           |
|--------|---|--------------------------|---|-----|---|-----------|
| 440225 | F | Addis Abat Lower Tha     | 0 | 60  | N | Pass      |
| 440563 | F | Amhara Re Lower Tha      | 0 | 60  | N | Pass      |
| 440593 | M | South Regi Lower Tha     | 1 | 60  | N | Pass      |
| 440751 | M | South Wes Lower Tha      | 1 | 60  | N | Withdrawn |
| 440765 | F | Amhara Re Lower Tha      | 2 | 60  | N | Fail      |
| 442144 | F | Amhara Re Lower Tha      | 2 | 120 | N | Withdrawn |
| 442910 | F | South Regi Lower Tha     | 2 | 60  | N | Pass      |
| 443108 | F | Somalia Re A Level or I  | 1 | 60  | N | Fail      |
| 443923 | F | Amhara Re Lower Tha      | 0 | 60  | N | Withdrawn |
| 444225 | F | Sidamo Re A Level or I   | 2 | 60  | N | Fail      |
| 444729 | F | South Regi Lower Tha     | 1 | 90  | N | Withdrawn |
| 444821 | F | Sidamo Re A Level or I   | 0 | 60  | N | Pass      |
| 444960 | F | Addis Abat Lower Tha     | 2 | 60  | N | Withdrawn |
| 445230 | F | Addis Abat A Level or I  | 0 | 75  | N | Withdrawn |
| 445351 | F | South Wes Lower Tha      | 0 | 120 | N | Withdrawn |
| 445760 | F | Addis Abat A Level or I  | 0 | 60  | N | Pass      |
| 446345 | F | South Wes A Level or I   | 0 | 60  | N | Fail      |
| 446873 | F | Amhara Re Lower Tha      | 0 | 90  | N | Fail      |
| 447086 | M | Somalia Re A Level or I  | 1 | 60  | N | Pass      |
| 447516 | F | Sidamo Re Lower Tha      | 0 | 120 | N | Pass      |
| 464525 | M | South Regi A Level or I  | 0 | 120 | N | Pass      |
| 465730 | F | Tigrai Regi A Level or I | 2 | 60  | N | Fail      |
| 466202 | F | Tigrai Regi Lower Tha    | 3 | 60  | N | Pass      |
| 466477 | F | South Regi Lower Tha     | 1 | 60  | N | Pass      |
| 466800 | F | Afar Regio Lower Tha     | 2 | 60  | N | Pass      |
| 466854 | F | Somalia Re A Level or I  | 1 | 120 | N | Fail      |
| 467179 | F | Somalia Re Lower Tha     | 0 | 100 | Y | Withdrawn |
| 467330 | F | Oromia Re Lower Tha      | 2 | 150 | Y | Withdrawn |
| 467396 | F | Tigrai Regi Lower Tha    | 1 | 60  | N | Withdrawn |
| 467606 | F | South Wes Lower Tha      | 1 | 60  | Y | Withdrawn |
| 467721 | F | South Regi Lower Tha     | 0 | 120 | N | Withdrawn |
| 468187 | M | Addis Abat No Formal     | 1 | 120 | N | Fail      |
| 468482 | F | South Regi A Level or I  | 0 | 60  | Y | Withdrawn |
| 469878 | F | Oromia Re A Level or I   | 0 | 60  | N | Pass      |
| 470869 | F | Oromia Re A Level or I   | 1 | 60  | N | Pass      |
| 471196 | F | Addis Abat A Level or I  | 0 | 120 | N | Pass      |
| 471434 | F | Sidamo Re A Level or I   | 0 | 60  | N | Withdrawn |
| 471711 | F | Somalia Re A Level or I  | 1 | 60  | N | Pass      |
| 472262 | F | Sidamo Re Lower Tha      | 0 | 60  | N | Fail      |
| 472327 | M | Addis Abat Lower Tha     | 0 | 120 | N | Pass      |
| 473509 | M | South Regi Lower Tha     | 1 | 300 | N | Withdrawn |
| 474071 | M | Addis Abat Lower Tha     | 1 | 60  | Y | Fail      |
| 475215 | F | Afar Regio A Level or I  | 0 | 120 | N | Withdrawn |
| 475241 | F | Afar Regio Lower Tha     | 0 | 60  | Y | Fail      |
| 475594 | F | Somalia Re A Level or I  | 0 | 210 | Y | Fail      |
| 475682 | F | Sidamo Re Lower Tha      | 1 | 60  | N | Withdrawn |
| 476278 | F | Afar Regio HE Qualific   | 0 | 60  | N | Pass      |

|        |   |                          |   |     |   |             |
|--------|---|--------------------------|---|-----|---|-------------|
| 476816 | F | Sidamo Re A Level or I   | 2 | 210 | N | Fail        |
| 477319 | F | South Regi HE Qualific   | 0 | 60  | N | Withdrawn   |
| 477825 | F | Oromia Re Lower Than     | 0 | 60  | N | Pass        |
| 478069 | F | Sidamo Re Lower Than     | 0 | 60  | N | Pass        |
| 478718 | F | Addis Abak Lower Than    | 1 | 60  | N | Fail        |
| 478967 | F | South Wes A Level or I   | 1 | 60  | N | Fail        |
| 479020 | F | South Regi Lower Than    | 0 | 210 | N | Pass        |
| 479170 | F | Sidamo Re HE Qualific    | 0 | 60  | N | Pass        |
| 479305 | F | Sidamo Re Lower Than     | 0 | 60  | N | Pass        |
| 479853 | F | Sidamo Re A Level or I   | 0 | 60  | N | Distinction |
| 480667 | F | South Regi A Level or I  | 0 | 60  | N | Withdrawn   |
| 480888 | F | South Regi Lower Than    | 0 | 60  | N | Distinction |
| 481448 | F | Addis Abak Lower Than    | 1 | 120 | N | Fail        |
| 482356 | F | Tigrai Regi Lower Than   | 0 | 90  | N | Pass        |
| 482556 | F | Addis Abak A Level or I  | 0 | 60  | N | Withdrawn   |
| 482680 | M | Afar Regi A Level or I   | 0 | 75  | Y | Pass        |
| 482810 | F | Oromia Re A Level or I   | 0 | 60  | N | Pass        |
| 483135 | F | Addis Abak Lower Than    | 1 | 60  | N | Withdrawn   |
| 483339 | M | Sidamo Re Lower Than     | 1 | 60  | N | Withdrawn   |
| 483646 | F | Somalia Re Lower Than    | 0 | 120 | N | Pass        |
| 483703 | F | Amhara Re A Level or I   | 0 | 60  | N | Withdrawn   |
| 483744 | F | South Regi Lower Than    | 0 | 180 | Y | Withdrawn   |
| 483876 | F | Sidamo Re No Formal      | 0 | 120 | N | Pass        |
| 484135 | F | Sidamo Re HE Qualific    | 1 | 60  | N | Pass        |
| 484301 | F | Somalia Re A Level or I  | 0 | 60  | Y | Pass        |
| 484412 | F | South Wes A Level or I   | 0 | 120 | N | Pass        |
| 484446 | F | South Wes A Level or I   | 0 | 180 | N | Withdrawn   |
| 485006 | F | Tigrai Regi Lower Than   | 0 | 60  | Y | Pass        |
| 485439 | F | Tigrai Regi Lower Than   | 1 | 60  | Y | Withdrawn   |
| 485534 | F | Tigrai Regi A Level or I | 0 | 60  | N | Distinction |
| 485560 | F | Addis Abak Lower Than    | 1 | 120 | N | Withdrawn   |
| 485762 | F | Sidamo Re A Level or I   | 0 | 60  | N | Pass        |
| 485772 | F | Sidamo Re Lower Than     | 0 | 60  | N | Fail        |
| 486004 | F | Addis Abak Lower Than    | 0 | 60  | N | Pass        |
| 486457 | F | Sidamo Re A Level or I   | 0 | 60  | N | Distinction |
| 486550 | F | Tigrai Regi A Level or I | 0 | 60  | N | Withdrawn   |
| 487214 | F | South Wes Lower Than     | 0 | 60  | N | Fail        |
| 487371 | F | Afar Regi HE Qualific    | 0 | 60  | N | Pass        |
| 487681 | F | Tigrai Regi Lower Than   | 0 | 60  | N | Pass        |
| 488176 | F | South Regi A Level or I  | 0 | 60  | N | Withdrawn   |
| 488195 | F | Sidamo Re A Level or I   | 0 | 60  | N | Pass        |
| 488427 | F | Addis Abak Lower Than    | 0 | 60  | N | Pass        |
| 488908 | F | Afar Regi A Level or I   | 1 | 120 | Y | Withdrawn   |
| 489320 | F | South Regi Lower Than    | 1 | 60  | Y | Pass        |
| 489889 | M | South Regi A Level or I  | 0 | 120 | N | Pass        |
| 489966 | F | South Regi Lower Than    | 0 | 150 | N | Withdrawn   |
| 490500 | F | South Wes Lower Than     | 0 | 120 | N | Fail        |



|        |   |                          |   |     |   |             |
|--------|---|--------------------------|---|-----|---|-------------|
| 490677 | F | Sidamo Re, A Level or l  | 0 | 60  | N | Pass        |
| 490894 | F | Sidamo Re, A Level or l  | 1 | 70  | N | Fail        |
| 491097 | F | North Regi Lower Tha     | 1 | 120 | Y | Fail        |
| 491279 | F | Afar Regioi Lower Tha    | 1 | 60  | Y | Pass        |
| 491758 | F | Addis Abak Lower Tha     | 0 | 60  | N | Withdrawn   |
| 491907 | F | Oromia Re Lower Tha      | 1 | 60  | N | Fail        |
| 491966 | F | Addis Abak A Level or l  | 1 | 60  | N | Pass        |
| 492153 | F | Addis Abak A Level or l  | 0 | 120 | Y | Pass        |
| 492229 | F | Amhara Re A Level or l   | 1 | 60  | Y | Withdrawn   |
| 492247 | M | Oromia Re Lower Tha      | 0 | 60  | N | Withdrawn   |
| 492286 | F | Sidamo Re, Lower Tha     | 0 | 60  | N | Pass        |
| 492478 | F | Addis Abak A Level or l  | 0 | 120 | N | Withdrawn   |
| 492726 | F | Afar Regioi A Level or l | 0 | 60  | N | Pass        |
| 493453 | F | South Regi Lower Tha     | 0 | 60  | N | Pass        |
| 493465 | F | South Regi A Level or l  | 0 | 60  | N | Pass        |
| 493672 | F | Afar Regioi Lower Tha    | 0 | 60  | N | Withdrawn   |
| 493891 | F | Amhara Re A Level or l   | 0 | 60  | N | Withdrawn   |
| 493999 | F | Oromia Re Lower Tha      | 0 | 60  | N | Fail        |
| 494214 | F | South Wes A Level or l   | 0 | 60  | N | Distinction |
| 494471 | F | South Wes Lower Tha      | 0 | 90  | N | Fail        |
| 494789 | F | Tigrai Regi HE Qualific  | 0 | 120 | N | Distinction |
| 494896 | F | Addis Abak Lower Tha     | 0 | 120 | N | Withdrawn   |
| 494960 | F | Sidamo Re, A Level or l  | 0 | 120 | N | Pass        |
| 495035 | F | South Regi A Level or l  | 0 | 60  | Y | Pass        |
| 495449 | F | South Regi Lower Tha     | 0 | 120 | N | Pass        |
| 495509 | F | Amhara Re A Level or l   | 0 | 60  | N | Pass        |
| 495625 | M | Addis Abak A Level or l  | 0 | 120 | Y | Pass        |
| 495875 | F | Sidamo Re, Lower Tha     | 1 | 60  | N | Fail        |
| 495879 | F | Afar Regioi Lower Tha    | 0 | 60  | N | Pass        |
| 495913 | F | Tigrai Regi A Level or l | 2 | 60  | N | Pass        |
| 496091 | F | Sidamo Re, Lower Tha     | 1 | 60  | N | Fail        |
| 496334 | F | Sidamo Re, A Level or l  | 0 | 60  | N | Fail        |
| 496442 | F | South Regi Lower Tha     | 0 | 60  | N | Pass        |
| 496764 | F | Sidamo Re, No Formal     | 0 | 120 | N | Distinction |
| 497130 | F | South Regi Lower Tha     | 0 | 60  | N | Pass        |
| 497632 | F | Tigrai Regi A Level or l | 1 | 60  | N | Pass        |
| 497925 | F | Addis Abak Lower Tha     | 1 | 60  | N | Withdrawn   |
| 498543 | M | Afar Regioi Lower Tha    | 1 | 60  | N | Pass        |
| 498635 | M | South Wes A Level or l   | 1 | 60  | N | Pass        |
| 498755 | F | Sidamo Re, A Level or l  | 0 | 120 | N | Pass        |
| 498841 | F | Somalia Re A Level or l  | 0 | 120 | N | Withdrawn   |
| 498892 | M | Afar Regioi Lower Tha    | 0 | 60  | N | Fail        |
| 499373 | F | South Wes Lower Tha      | 0 | 120 | N | Withdrawn   |
| 499624 | F | Sidamo Re, A Level or l  | 2 | 60  | N | Withdrawn   |
| 499822 | F | Tigrai Regi HE Qualific  | 0 | 240 | N | Withdrawn   |
| 500016 | F | Sidamo Re, Lower Tha     | 0 | 180 | N | Pass        |
| 500135 | F | Addis Abak A Level or l  | 1 | 60  | Y | Fail        |

|        |   |             |              |   |     |   |             |
|--------|---|-------------|--------------|---|-----|---|-------------|
| 500279 | F | Addis Abab  | A Level or I | 0 | 120 | N | Withdrawn   |
| 500552 | F | Sidamo Re   | Lower Thar   | 0 | 60  | N | Pass        |
| 500625 | M | Oromia Re   | Lower Thar   | 0 | 60  | N | Withdrawn   |
| 500668 | F | Afar Regio  | HE Qualific  | 0 | 120 | N | Pass        |
| 501053 | F | Oromia Re   | Lower Thar   | 1 | 120 | N | Fail        |
| 501208 | F | Oromia Re   | Lower Thar   | 1 | 60  | N | Pass        |
| 501637 | F | South Wes   | A Level or I | 1 | 120 | Y | Pass        |
| 501862 | F | Tigrai Regi | Lower Thar   | 0 | 60  | N | Fail        |
| 501945 | F | South Regi  | Lower Thar   | 0 | 60  | N | Withdrawn   |
| 502391 | M | Afar Regio  | HE Qualific  | 1 | 120 | N | Fail        |
| 502452 | F | South Wes   | A Level or I | 0 | 120 | N | Withdrawn   |
| 502621 | F | South Wes   | A Level or I | 0 | 120 | Y | Withdrawn   |
| 503322 | F | South Wes   | Lower Thar   | 0 | 60  | N | Pass        |
| 503516 | F | Afar Regio  | Lower Thar   | 0 | 60  | Y | Fail        |
| 503804 | F | South Wes   | Lower Thar   | 0 | 60  | N | Pass        |
| 503878 | F | South Wes   | Lower Thar   | 1 | 180 | Y | Fail        |
| 504013 | F | Tigrai Regi | A Level or I | 1 | 60  | N | Pass        |
| 504022 | F | North Regi  | A Level or I | 1 | 120 | N | Pass        |
| 504466 | F | Afar Regio  | Lower Thar   | 1 | 60  | N | Pass        |
| 504635 | F | Tigrai Regi | HE Qualific  | 0 | 60  | N | Pass        |
| 504842 | F | Somalia Re  | Lower Thar   | 0 | 60  | N | Withdrawn   |
| 505413 | F | South Regi  | A Level or I | 0 | 60  | N | Pass        |
| 505595 | F | Sidamo Re   | Lower Thar   | 2 | 60  | Y | Withdrawn   |
| 506185 | F | Sidamo Re   | Lower Thar   | 0 | 60  | N | Fail        |
| 506248 | F | Oromia Re   | Lower Thar   | 0 | 60  | N | Fail        |
| 506804 | F | North Regi  | A Level or I | 0 | 120 | N | Pass        |
| 506980 | F | Afar Regio  | A Level or I | 1 | 120 | N | Fail        |
| 507016 | F | Amhara Re   | A Level or I | 0 | 90  | N | Pass        |
| 507279 | F | South Regi  | Lower Thar   | 0 | 60  | Y | Fail        |
| 507387 | F | Addis Abab  | A Level or I | 0 | 60  | N | Fail        |
| 507389 | F | Tigrai Regi | Lower Thar   | 0 | 60  | N | Fail        |
| 507676 | F | Sidamo Re   | No Formal    | 2 | 120 | N | Fail        |
| 507944 | M | Amhara Re   | A Level or I | 0 | 60  | N | Withdrawn   |
| 508028 | F | South Wes   | A Level or I | 0 | 60  | N | Pass        |
| 508047 | F | Oromia Re   | Lower Thar   | 0 | 120 | Y | Withdrawn   |
| 508079 | F | Tigrai Regi | Lower Thar   | 0 | 60  | N | Pass        |
| 508414 | F | South Wes   | Lower Thar   | 1 | 60  | N | Withdrawn   |
| 508422 | M | South Wes   | Lower Thar   | 1 | 60  | N | Fail        |
| 508517 | F | Sidamo Re   | No Formal    | 2 | 60  | N | Fail        |
| 508759 | F | Addis Abab  | A Level or I | 0 | 120 | N | Withdrawn   |
| 509036 | F | Afar Regio  | A Level or I | 0 | 120 | N | Fail        |
| 509236 | F | Sidamo Re   | A Level or I | 0 | 180 | N | Fail        |
| 509258 | F | Amhara Re   | Lower Thar   | 0 | 60  | N | Fail        |
| 509390 | F | South Regi  | A Level or I | 1 | 120 | Y | Fail        |
| 509607 | F | North Regi  | Lower Thar   | 1 | 60  | N | Distinction |
| 509845 | F | South Regi  | A Level or I | 0 | 60  | N | Withdrawn   |
| 509913 | F | Amhara Re   | Lower Thar   | 0 | 60  | N | Fail        |

|        |   |                          |   |     |   |             |
|--------|---|--------------------------|---|-----|---|-------------|
| 510149 | F | Addis Abat Lower Tha     | 0 | 180 | N | Fail        |
| 510438 | F | Amhara Re A Level or I   | 0 | 60  | N | Fail        |
| 510650 | F | South Wes Lower Tha      | 0 | 120 | Y | Withdrawn   |
| 510776 | F | Sidamo Re Lower Tha      | 1 | 60  | N | Fail        |
| 510868 | F | Sidamo Re A Level or I   | 0 | 90  | N | Withdrawn   |
| 511678 | F | South Regi A Level or I  | 0 | 120 | N | Pass        |
| 512417 | F | Afar Regio A Level or I  | 1 | 60  | N | Pass        |
| 512581 | F | Afar Regio Lower Tha     | 1 | 60  | N | Fail        |
| 512775 | F | Afar Regio HE Qualific   | 0 | 90  | N | Pass        |
| 512839 | M | Sidamo Re Lower Tha      | 0 | 150 | N | Fail        |
| 512883 | F | Tigrai Regi Lower Tha    | 2 | 60  | N | Withdrawn   |
| 512940 | F | Tigrai Regi Lower Tha    | 0 | 60  | N | Pass        |
| 512977 | M | Amhara Re A Level or I   | 0 | 60  | N | Pass        |
| 513076 | F | Amhara Re Lower Tha      | 0 | 120 | Y | Fail        |
| 513648 | F | Sidamo Re A Level or I   | 0 | 120 | N | Withdrawn   |
| 513836 | F | Addis Abak HE Qualific   | 0 | 60  | N | Withdrawn   |
| 514043 | F | Sidamo Re A Level or I   | 1 | 60  | N | Pass        |
| 514074 | F | Somalia Re A Level or I  | 0 | 60  | N | Withdrawn   |
| 514302 | F | Addis Abak Lower Tha     | 0 | 60  | N | Pass        |
| 514445 | F | Tigrai Regi A Level or I | 0 | 120 | N | Pass        |
| 514776 | F | Afar Regio Lower Tha     | 2 | 60  | Y | Fail        |
| 514824 | F | Sidamo Re A Level or I   | 1 | 60  | N | Withdrawn   |
| 514864 | F | South Regi Lower Tha     | 0 | 60  | N | Pass        |
| 515203 | F | Tigrai Regi Lower Tha    | 0 | 180 | N | Fail        |
| 515209 | F | Somalia Re HE Qualific   | 0 | 120 | N | Withdrawn   |
| 515417 | M | South Wes HE Qualific    | 0 | 180 | N | Fail        |
| 515646 | F | Addis Abak Lower Tha     | 0 | 60  | N | Pass        |
| 515676 | F | Somalia Re Lower Tha     | 0 | 60  | N | Pass        |
| 516055 | F | South Wes A Level or I   | 0 | 120 | N | Withdrawn   |
| 516165 | F | South Regi Lower Tha     | 0 | 60  | N | Withdrawn   |
| 516212 | F | Somalia Re A Level or I  | 0 | 60  | N | Withdrawn   |
| 516214 | F | Sidamo Re A Level or I   | 0 | 150 | N | Withdrawn   |
| 516364 | F | Addis Abak Lower Tha     | 0 | 60  | N | Withdrawn   |
| 516447 | F | Afar Regio Lower Tha     | 2 | 120 | N | Withdrawn   |
| 516926 | M | Amhara Re Lower Tha      | 0 | 60  | Y | Fail        |
| 517000 | F | Amhara Re A Level or I   | 2 | 60  | N | Distinction |
| 517016 | F | South Regi A Level or I  | 0 | 60  | Y | Fail        |
| 517075 | F | South Wes A Level or I   | 0 | 120 | N | Withdrawn   |
| 517231 | F | Afar Regio A Level or I  | 0 | 60  | N | Pass        |
| 517352 | F | Addis Abak Lower Tha     | 0 | 60  | N | Pass        |
| 517553 | F | Tigrai Regi Lower Tha    | 1 | 60  | N | Withdrawn   |
| 517922 | F | South Regi Lower Tha     | 0 | 60  | N | Withdrawn   |
| 518029 | F | Oromia Re Lower Tha      | 1 | 60  | N | Withdrawn   |
| 518126 | F | South Regi A Level or I  | 1 | 120 | N | Pass        |
| 518223 | M | Addis Abak Lower Tha     | 1 | 60  | Y | Pass        |
| 518258 | F | Oromia Re Lower Tha      | 0 | 60  | N | Distinction |
| 518496 | F | Addis Abak Lower Tha     | 0 | 60  | Y | Pass        |

|        |   |                          |   |     |   |             |
|--------|---|--------------------------|---|-----|---|-------------|
| 519294 | F | Addis Abat Lower Tha     | 0 | 60  | N | Pass        |
| 519584 | F | South Regi Lower Tha     | 0 | 60  | N | Pass        |
| 519622 | F | Somalia Re A Level or I  | 1 | 180 | Y | Fail        |
| 519751 | F | Sidamo Re No Formal      | 0 | 60  | N | Withdrawn   |
| 519945 | F | Sidamo Re Lower Tha      | 0 | 60  | N | Withdrawn   |
| 520002 | F | Addis Abat Lower Tha     | 0 | 120 | N | Pass        |
| 520006 | F | Somalia Re A Level or I  | 0 | 60  | N | Distinction |
| 520024 | F | Sidamo Re A Level or I   | 0 | 60  | N | Withdrawn   |
| 520100 | F | Oromia Re Lower Tha      | 0 | 60  | N | Fail        |
| 520153 | F | South Regi Lower Tha     | 0 | 240 | N | Withdrawn   |
| 520286 | F | Tigrai Regi Lower Tha    | 0 | 60  | N | Distinction |
| 520325 | F | South Regi Lower Tha     | 0 | 60  | N | Fail        |
| 521209 | M | North Regi Lower Tha     | 0 | 120 | N | Withdrawn   |
| 521341 | F | South Regi HE Qualific   | 0 | 120 | Y | Pass        |
| 521456 | F | Amhara Re A Level or I   | 0 | 60  | N | Withdrawn   |
| 521509 | F | South Wes Lower Tha      | 0 | 120 | N | Pass        |
| 521590 | F | Amhara Re Lower Tha      | 0 | 60  | N | Pass        |
| 521666 | F | Sidamo Re A Level or I   | 1 | 120 | N | Fail        |
| 521895 | F | North Regi A Level or I  | 0 | 120 | N | Pass        |
| 521957 | F | South Wes Lower Tha      | 2 | 120 | N | Withdrawn   |
| 522426 | F | Afar Regio HE Qualific   | 0 | 60  | N | Pass        |
| 522434 | M | Afar Regio Lower Tha     | 0 | 60  | N | Pass        |
| 522441 | M | Afar Regio A Level or I  | 0 | 60  | N | Pass        |
| 522443 | F | Afar Regio A Level or I  | 0 | 120 | N | Fail        |
| 522446 | F | Afar Regio A Level or I  | 0 | 60  | N | Pass        |
| 522529 | F | Afar Regio A Level or I  | 0 | 60  | N | Pass        |
| 522622 | F | Tigrai Regi Lower Tha    | 1 | 120 | N | Pass        |
| 522650 | F | Addis Abat Lower Tha     | 0 | 60  | N | Withdrawn   |
| 522714 | F | Tigrai Regi A Level or I | 0 | 60  | N | Pass        |
| 522792 | F | Sidamo Re Lower Tha      | 0 | 60  | N | Pass        |
| 522889 | F | Afar Regio Lower Tha     | 0 | 60  | N | Fail        |
| 522891 | F | Afar Regio Lower Tha     | 0 | 60  | N | Pass        |
| 522894 | F | Afar Regio HE Qualific   | 0 | 120 | N | Pass        |
| 522899 | F | Afar Regio HE Qualific   | 0 | 120 | N | Fail        |
| 523331 | F | Sidamo Re Lower Tha      | 0 | 60  | N | Fail        |
| 523398 | F | South Regi A Level or I  | 1 | 60  | N | Fail        |
| 523466 | F | Tigrai Regi A Level or I | 0 | 180 | N | Pass        |
| 523545 | F | Afar Regio HE Qualific   | 0 | 60  | N | Pass        |
| 523655 | F | Tigrai Regi Lower Tha    | 0 | 60  | N | Pass        |
| 523757 | F | Amhara Re Lower Tha      | 1 | 60  | N | Fail        |
| 523857 | F | South Regi HE Qualific   | 0 | 120 | Y | Pass        |
| 523875 | F | Afar Regio A Level or I  | 0 | 60  | N | Distinction |
| 523885 | F | Afar Regio A Level or I  | 0 | 60  | N | Withdrawn   |
| 523928 | F | Sidamo Re A Level or I   | 0 | 60  | N | Pass        |
| 524076 | F | Sidamo Re A Level or I   | 0 | 60  | N | Fail        |
| 524496 | F | South Regi A Level or I  | 1 | 60  | N | Fail        |
| 524790 | F | Oromia Re A Level or I   | 0 | 60  | N | Distinction |

|        |   |                           |   |     |   |             |
|--------|---|---------------------------|---|-----|---|-------------|
| 525877 | F | Afar Region Lower Than    | 2 | 60  | Y | Withdrawn   |
| 525885 | F | Oromia Region HE Qualific | 1 | 60  | N | Fail        |
| 525974 | F | Addis Ababa Lower Than    | 0 | 60  | N | Distinction |
| 526088 | F | Addis Ababa Lower Than    | 0 | 60  | N | Fail        |
| 526177 | F | Afar Region Lower Than    | 0 | 75  | N | Pass        |
| 526506 | F | Sidamo Region A Level or  | 2 | 60  | N | Withdrawn   |
| 526810 | F | North Region A Level or   | 0 | 60  | N | Withdrawn   |
| 527393 | F | Afar Region Lower Than    | 0 | 60  | N | Pass        |
| 527580 | F | South Region Lower Than   | 0 | 60  | N | Pass        |
| 527636 | F | Tigray Region A Level or  | 1 | 120 | N | Fail        |
| 527689 | F | Afar Region Lower Than    | 0 | 60  | N | Withdrawn   |
| 527799 | M | Sidamo Region A Level or  | 1 | 60  | N | Fail        |
| 528056 | F | South West A Level or     | 1 | 60  | N | Fail        |
| 528204 | F | Amhara Region Lower Than  | 0 | 60  | N | Withdrawn   |
| 528464 | F | Oromia Region A Level or  | 2 | 60  | N | Pass        |
| 528642 | F | Tigray Region Lower Than  | 0 | 390 | N | Withdrawn   |
| 529000 | F | Addis Ababa Lower Than    | 0 | 60  | Y | Fail        |
| 529163 | F | South Region Lower Than   | 1 | 60  | N | Withdrawn   |
| 529597 | F | Somalia Region Lower Than | 0 | 120 | Y | Fail        |
| 529795 | F | Afar Region HE Qualific   | 0 | 60  | N | Fail        |
| 530021 | F | Sidamo Region A Level or  | 0 | 60  | N | Fail        |
| 530112 | F | Afar Region Lower Than    | 1 | 60  | N | Fail        |
| 530487 | F | Sidamo Region HE Qualific | 0 | 60  | N | Pass        |
| 530514 | F | Somalia Region Lower Than | 0 | 60  | Y | Pass        |
| 530753 | F | South West Lower Than     | 0 | 60  | Y | Fail        |
| 530841 | F | North Region A Level or   | 0 | 60  | N | Pass        |
| 531287 | F | Sidamo Region A Level or  | 0 | 60  | N | Withdrawn   |
| 531384 | F | Afar Region Lower Than    | 0 | 60  | N | Pass        |
| 531643 | F | Amhara Region A Level or  | 0 | 60  | N | Distinction |
| 532114 | F | Sidamo Region A Level or  | 0 | 60  | N | Withdrawn   |
| 532335 | F | South Region Lower Than   | 0 | 60  | N | Pass        |
| 532477 | F | Afar Region A Level or    | 0 | 60  | N | Pass        |
| 532615 | F | Tigray Region Lower Than  | 0 | 120 | N | Distinction |
| 532739 | F | Afar Region HE Qualific   | 0 | 60  | N | Pass        |
| 532750 | F | Sidamo Region A Level or  | 0 | 60  | N | Distinction |
| 532839 | F | North Region HE Qualific  | 1 | 60  | N | Fail        |
| 532868 | F | Addis Ababa Lower Than    | 0 | 60  | N | Fail        |
| 532869 | F | Sidamo Region Lower Than  | 0 | 60  | N | Pass        |
| 533091 | M | Amhara Region Lower Than  | 0 | 60  | N | Distinction |
| 533164 | F | Tigray Region Lower Than  | 1 | 60  | N | Withdrawn   |
| 533301 | F | Addis Ababa A Level or    | 0 | 60  | Y | Pass        |
| 533414 | F | Addis Ababa Lower Than    | 1 | 120 | N | Withdrawn   |
| 533449 | M | Sidamo Region Lower Than  | 0 | 60  | N | Withdrawn   |
| 534133 | F | Sidamo Region Lower Than  | 0 | 60  | N | Pass        |
| 534323 | F | North Region A Level or   | 0 | 60  | N | Pass        |
| 534816 | F | South Region Lower Than   | 1 | 60  | N | Fail        |
| 534946 | F | Sidamo Region A Level or  | 0 | 60  | N | Pass        |

|          |                          |   |       |             |
|----------|--------------------------|---|-------|-------------|
| 534998 F | North Regi Lower Tha     | 1 | 60 N  | Pass        |
| 535168 F | Amhara Re A Level or I   | 0 | 120 N | Withdrawn   |
| 535269 F | Sidamo Re A Level or I   | 1 | 60 N  | Fail        |
| 535379 F | Addis Abak A Level or I  | 0 | 60 N  | Pass        |
| 535833 F | South Wes Lower Tha      | 0 | 60 N  | Pass        |
| 536318 F | Addis Abak A Level or I  | 0 | 120 N | Pass        |
| 536409 F | Somalia Re A Level or I  | 0 | 120 N | Withdrawn   |
| 536487 F | Afar Regio Lower Tha     | 1 | 60 N  | Withdrawn   |
| 536632 F | South Wes HE Qualific    | 0 | 60 N  | Pass        |
| 536649 F | South Wes Lower Tha      | 0 | 60 N  | Fail        |
| 536660 F | South Wes Lower Tha      | 0 | 60 N  | Pass        |
| 536663 M | South Wes A Level or I   | 0 | 60 N  | Withdrawn   |
| 536664 F | South Wes Lower Tha      | 0 | 60 N  | Fail        |
| 536666 F | Sidamo Re Lower Tha      | 0 | 60 N  | Pass        |
| 536852 F | Addis Abak Lower Tha     | 0 | 60 N  | Fail        |
| 536992 F | South Regi A Level or I  | 0 | 60 N  | Pass        |
| 537271 F | South Regi A Level or I  | 0 | 120 N | Fail        |
| 538210 F | South Regi Lower Tha     | 0 | 60 N  | Pass        |
| 539299 F | Somalia Re Lower Tha     | 1 | 60 N  | Withdrawn   |
| 539414 F | Oromia Re A Level or I   | 0 | 60 N  | Withdrawn   |
| 539426 F | Sidamo Re No Formal      | 1 | 60 N  | Fail        |
| 539670 M | Addis Abak A Level or I  | 0 | 120 N | Fail        |
| 540005 F | South Regi A Level or I  | 1 | 60 N  | Pass        |
| 540249 M | Addis Abak A Level or I  | 0 | 120 N | Fail        |
| 540293 F | Tigrai Regi Lower Tha    | 0 | 60 N  | Pass        |
| 540521 F | Addis Abak A Level or I  | 0 | 75 N  | Pass        |
| 540602 F | South Regi Lower Tha     | 0 | 60 N  | Pass        |
| 540682 F | Oromia Re Lower Tha      | 0 | 60 N  | Pass        |
| 541171 F | Tigrai Regi A Level or I | 0 | 120 N | Withdrawn   |
| 541274 M | Sidamo Re Lower Tha      | 1 | 60 N  | Distinction |
| 541586 F | Somalia Re A Level or I  | 0 | 60 N  | Distinction |
| 541702 F | Addis Abak A Level or I  | 0 | 120 N | Distinction |
| 541842 F | Oromia Re Lower Tha      | 0 | 60 N  | Withdrawn   |
| 542296 F | Tigrai Regi Lower Tha    | 1 | 60 N  | Pass        |
| 542472 F | Amhara Re Lower Tha      | 0 | 90 N  | Fail        |
| 542562 F | Oromia Re A Level or I   | 1 | 270 Y | Withdrawn   |
| 542574 F | Somalia Re Lower Tha     | 0 | 60 N  | Distinction |
| 542707 F | Amhara Re A Level or I   | 0 | 60 N  | Fail        |
| 543021 M | Afar Regio Lower Tha     | 0 | 60 N  | Withdrawn   |
| 543199 F | South Regi A Level or I  | 1 | 90 N  | Withdrawn   |
| 543279 F | Sidamo Re A Level or I   | 0 | 60 N  | Fail        |
| 543418 F | Tigrai Regi Lower Tha    | 0 | 60 N  | Withdrawn   |
| 543428 F | South Regi Lower Tha     | 1 | 60 N  | Pass        |
| 544122 F | Tigrai Regi A Level or I | 0 | 60 N  | Distinction |
| 544627 F | Addis Abak Lower Tha     | 1 | 60 N  | Fail        |
| 545200 F | Amhara Re A Level or I   | 0 | 60 N  | Pass        |
| 545247 F | South Regi Lower Tha     | 0 | 60 N  | Fail        |

|        |   |                          |   |     |   |             |
|--------|---|--------------------------|---|-----|---|-------------|
| 545297 | F | Addis Abat Lower Tha     | 0 | 60  | Y | Fail        |
| 545298 | F | Amhara Re Lower Tha      | 0 | 60  | N | Pass        |
| 545443 | F | Amhara Re A Level or I   | 0 | 60  | N | Pass        |
| 545462 | F | South Regi A Level or I  | 0 | 60  | N | Pass        |
| 545521 | M | South Regi Lower Tha     | 1 | 60  | Y | Withdrawn   |
| 546124 | F | Sidamo Re A Level or I   | 0 | 120 | N | Withdrawn   |
| 546195 | M | Sidamo Re Lower Tha      | 0 | 150 | N | Fail        |
| 546196 | F | Amhara Re A Level or I   | 0 | 120 | Y | Pass        |
| 546941 | F | South Regi A Level or I  | 1 | 60  | N | Distinction |
| 547266 | F | Sidamo Re HE Qualific    | 0 | 60  | N | Withdrawn   |
| 547311 | F | Amhara Re Lower Tha      | 0 | 60  | N | Fail        |
| 547718 | F | Sidamo Re Lower Tha      | 0 | 60  | N | Withdrawn   |
| 547755 | F | Tigrai Regi Lower Tha    | 1 | 120 | N | Withdrawn   |
| 547979 | F | Oromia Re No Formal      | 0 | 120 | N | Withdrawn   |
| 548197 | F | Afar Regio Lower Tha     | 0 | 60  | N | Pass        |
| 548899 | F | Addis Abak A Level or I  | 0 | 60  | N | Pass        |
| 549129 | F | Sidamo Re HE Qualific    | 1 | 60  | N | Pass        |
| 549226 | F | Somalia Re A Level or I  | 0 | 60  | N | Fail        |
| 549445 | F | South Wes Lower Tha      | 0 | 75  | N | Pass        |
| 549586 | F | Sidamo Re Lower Tha      | 0 | 60  | N | Pass        |
| 549745 | F | Amhara Re A Level or I   | 0 | 120 | N | Withdrawn   |
| 549873 | F | Amhara Re A Level or I   | 1 | 60  | N | Fail        |
| 549918 | F | Amhara Re A Level or I   | 0 | 60  | N | Fail        |
| 550412 | F | Amhara Re Lower Tha      | 0 | 60  | N | Pass        |
| 550559 | F | Amhara Re A Level or I   | 0 | 60  | N | Withdrawn   |
| 550880 | F | Oromia Re A Level or I   | 1 | 60  | N | Distinction |
| 550941 | F | Tigrai Regi Lower Tha    | 1 | 120 | Y | Pass        |
| 551031 | F | Sidamo Re Lower Tha      | 0 | 60  | N | Fail        |
| 551136 | F | Amhara Re Lower Tha      | 0 | 60  | N | Withdrawn   |
| 551205 | F | Somalia Re Lower Tha     | 1 | 60  | N | Pass        |
| 551219 | F | Tigrai Regi A Level or I | 0 | 90  | N | Pass        |
| 551234 | F | Sidamo Re Lower Tha      | 0 | 60  | N | Pass        |
| 551347 | M | Tigrai Regi Lower Tha    | 1 | 60  | N | Pass        |
| 551515 | F | Afar Regio Lower Tha     | 0 | 180 | N | Withdrawn   |
| 551628 | F | Sidamo Re Lower Tha      | 0 | 120 | Y | Withdrawn   |
| 551802 | F | Sidamo Re A Level or I   | 0 | 60  | N | Fail        |
| 551836 | M | North Regi Lower Tha     | 0 | 60  | N | Pass        |
| 552116 | F | South Regi Lower Tha     | 0 | 60  | N | Pass        |
| 552177 | F | Amhara Re A Level or I   | 0 | 60  | N | Fail        |
| 552205 | F | Afar Regio Lower Tha     | 1 | 60  | N | Pass        |
| 552339 | F | Addis Abak HE Qualific   | 0 | 60  | N | Pass        |
| 552399 | F | Sidamo Re A Level or I   | 0 | 60  | Y | Distinction |
| 552515 | F | South Wes A Level or I   | 0 | 120 | N | Pass        |
| 552622 | F | South Regi Lower Tha     | 1 | 60  | N | Pass        |
| 552865 | F | Amhara Re Lower Tha      | 0 | 60  | N | Withdrawn   |
| 552883 | F | Sidamo Re HE Qualific    | 0 | 120 | N | Fail        |
| 553078 | F | Tigrai Regi A Level or I | 0 | 60  | N | Pass        |

|        |   |                          |   |     |   |             |
|--------|---|--------------------------|---|-----|---|-------------|
| 553556 | F | South Regi Lower Tha     | 0 | 120 | N | Withdrawn   |
| 553825 | F | South Regi Lower Tha     | 0 | 120 | N | Pass        |
| 553856 | M | Addis Abak HE Qualific   | 0 | 60  | N | Pass        |
| 553893 | F | South Regi Lower Tha     | 0 | 180 | N | Fail        |
| 554243 | F | South Wes Lower Tha      | 0 | 60  | N | Fail        |
| 554297 | F | South Wes Lower Tha      | 0 | 120 | N | Fail        |
| 554314 | F | South Regi HE Qualific   | 0 | 120 | N | Fail        |
| 554540 | M | Amhara Re A Level or I   | 0 | 120 | N | Pass        |
| 555061 | F | Sidamo Re Lower Tha      | 0 | 90  | Y | Fail        |
| 555346 | F | South Wes Lower Tha      | 0 | 60  | Y | Pass        |
| 555614 | F | Somalia Re Lower Tha     | 1 | 60  | N | Distinction |
| 555721 | F | South Regi A Level or I  | 0 | 60  | N | Pass        |
| 555789 | F | Oromia Re Lower Tha      | 0 | 60  | N | Withdrawn   |
| 556062 | F | Amhara Re A Level or I   | 0 | 60  | N | Fail        |
| 556089 | F | Addis Abak Lower Tha     | 0 | 60  | N | Distinction |
| 556175 | M | Tigrai Regi Lower Tha    | 1 | 60  | N | Pass        |
| 556228 | M | Somalia Re A Level or I  | 0 | 60  | N | Pass        |
| 556427 | F | Somalia Re A Level or I  | 0 | 60  | N | Withdrawn   |
| 556592 | F | Sidamo Re A Level or I   | 0 | 60  | N | Pass        |
| 556637 | F | Somalia Re Lower Tha     | 0 | 60  | N | Withdrawn   |
| 556738 | F | Addis Abak Lower Tha     | 0 | 120 | N | Fail        |
| 556972 | F | South Wes Lower Tha      | 0 | 60  | N | Pass        |
| 557652 | F | Addis Abak Lower Tha     | 0 | 120 | N | Fail        |
| 558035 | F | South Regi A Level or I  | 0 | 120 | N | Withdrawn   |
| 558333 | F | South Regi Lower Tha     | 0 | 60  | N | Pass        |
| 558533 | F | South Regi A Level or I  | 0 | 60  | N | Pass        |
| 558661 | F | Amhara Re Lower Tha      | 0 | 60  | N | Fail        |
| 558755 | F | Amhara Re A Level or I   | 0 | 60  | N | Fail        |
| 558962 | F | South Wes Lower Tha      | 0 | 60  | N | Pass        |
| 558983 | F | Afar Regioi A Level or I | 0 | 60  | Y | Fail        |
| 559139 | F | Addis Abak A Level or I  | 0 | 60  | N | Withdrawn   |
| 559168 | M | Somalia Re HE Qualific   | 0 | 60  | N | Pass        |
| 559344 | M | South Regi A Level or I  | 0 | 120 | N | Withdrawn   |
| 559382 | F | South Wes A Level or I   | 0 | 180 | N | Pass        |
| 559414 | F | Afar Regioi HE Qualific  | 0 | 60  | N | Pass        |
| 559584 | F | South Regi A Level or I  | 0 | 60  | N | Pass        |
| 559685 | F | Afar Regioi HE Qualific  | 0 | 60  | N | Fail        |
| 559851 | F | North Regi A Level or I  | 0 | 60  | N | Pass        |
| 560030 | F | Sidamo Re Lower Tha      | 1 | 120 | N | Fail        |
| 560074 | F | Addis Abak A Level or I  | 0 | 60  | Y | Pass        |
| 560430 | F | Somalia Re Lower Tha     | 0 | 60  | N | Fail        |
| 560490 | F | South Regi A Level or I  | 0 | 210 | N | Withdrawn   |
| 560559 | F | Sidamo Re Lower Tha      | 0 | 60  | N | Withdrawn   |
| 560567 | F | South Regi Lower Tha     | 0 | 120 | N | Pass        |
| 560676 | F | Somalia Re Lower Tha     | 0 | 60  | N | Fail        |
| 560773 | F | South Regi A Level or I  | 0 | 120 | N | Pass        |
| 560920 | F | Sidamo Re A Level or I   | 0 | 120 | N | Withdrawn   |



|        |   |                          |   |     |   |             |
|--------|---|--------------------------|---|-----|---|-------------|
| 561312 | F | Sidamo Re A Level or I   | 0 | 60  | N | Distinction |
| 561457 | F | North Regi Lower Tha     | 0 | 150 | N | Pass        |
| 561534 | F | Afar Regio HE Qualific   | 0 | 60  | N | Pass        |
| 561549 | F | North Regi HE Qualific   | 0 | 60  | N | Fail        |
| 561591 | F | North Regi A Level or I  | 0 | 60  | N | Pass        |
| 561640 | F | Addis Abak A Level or I  | 0 | 60  | N | Distinction |
| 561674 | F | Addis Abak Lower Tha     | 0 | 120 | N | Withdrawn   |
| 561841 | F | Afar Regio Lower Tha     | 0 | 60  | N | Pass        |
| 561932 | M | Sidamo Re HE Qualific    | 0 | 60  | N | Fail        |
| 562090 | F | South Regi Lower Tha     | 0 | 60  | N | Pass        |
| 562270 | M | Amhara Re A Level or I   | 0 | 120 | N | Pass        |
| 562456 | F | South Wes Lower Tha      | 0 | 60  | N | Fail        |
| 563022 | F | Sidamo Re Lower Tha      | 0 | 120 | N | Withdrawn   |
| 563063 | F | Amhara Re A Level or I   | 0 | 60  | N | Withdrawn   |
| 563174 | F | Sidamo Re Lower Tha      | 0 | 60  | N | Fail        |
| 563374 | M | Afar Regio Lower Tha     | 0 | 60  | N | Fail        |
| 563706 | F | Oromia Re A Level or I   | 0 | 60  | N | Pass        |
| 563733 | F | Addis Abak A Level or I  | 0 | 60  | N | Pass        |
| 563735 | F | South Regi A Level or I  | 0 | 60  | N | Pass        |
| 563769 | F | Sidamo Re A Level or I   | 0 | 60  | N | Fail        |
| 563794 | F | Somalia Re Lower Tha     | 0 | 60  | N | Pass        |
| 564105 | F | South Wes A Level or I   | 0 | 60  | N | Pass        |
| 564129 | M | South Regi Lower Tha     | 0 | 60  | N | Pass        |
| 564144 | F | Tigrai Regi Lower Tha    | 0 | 60  | N | Pass        |
| 564245 | F | Afar Regio Post Gradu    | 0 | 60  | N | Pass        |
| 564268 | F | Addis Abak A Level or I  | 0 | 90  | N | Pass        |
| 564300 | F | Oromia Re A Level or I   | 0 | 120 | N | Withdrawn   |
| 564596 | F | Sidamo Re A Level or I   | 0 | 90  | N | Withdrawn   |
| 564626 | M | Sidamo Re A Level or I   | 0 | 60  | N | Fail        |
| 564791 | F | Sidamo Re Lower Tha      | 0 | 120 | N | Withdrawn   |
| 564792 | M | South Wes A Level or I   | 0 | 60  | N | Fail        |
| 564898 | F | Oromia Re A Level or I   | 0 | 75  | N | Distinction |
| 564930 | F | South Wes Lower Tha      | 0 | 60  | N | Withdrawn   |
| 564958 | F | South Regi A Level or I  | 0 | 60  | Y | Pass        |
| 564972 | F | Somalia Re Lower Tha     | 0 | 120 | N | Withdrawn   |
| 565035 | F | South Wes Lower Tha      | 0 | 120 | N | Fail        |
| 565393 | F | South Regi A Level or I  | 0 | 60  | N | Fail        |
| 565402 | F | South Regi Lower Tha     | 0 | 180 | N | Withdrawn   |
| 565513 | F | Tigrai Regi A Level or I | 0 | 120 | N | Distinction |
| 565518 | F | South Wes Lower Tha      | 0 | 330 | N | Withdrawn   |
| 565582 | F | Tigrai Regi Lower Tha    | 0 | 60  | N | Pass        |
| 565607 | F | Sidamo Re HE Qualific    | 0 | 120 | N | Pass        |
| 565715 | F | Oromia Re A Level or I   | 0 | 60  | N | Pass        |
| 565819 | F | Addis Abak A Level or I  | 0 | 120 | N | Withdrawn   |
| 565888 | F | South Regi A Level or I  | 0 | 60  | N | Pass        |
| 565919 | F | Afar Regio Lower Tha     | 0 | 60  | N | Pass        |
| 566133 | F | Addis Abak A Level or I  | 0 | 60  | N | Distinction |

|        |   |                            |   |     |   |             |
|--------|---|----------------------------|---|-----|---|-------------|
| 566339 | F | Somalia Re A Level or I    | 0 | 60  | Y | Pass        |
| 566346 | F | Afar Region HE Qualific    | 0 | 60  | N | Distinction |
| 566358 | F | Addis Abat A Level or I    | 0 | 120 | N | Fail        |
| 566369 | F | South Regi A Level or I    | 0 | 60  | N | Pass        |
| 566392 | F | Amhara Re Lower Than       | 0 | 150 | Y | Fail        |
| 566407 | M | Somalia Re A Level or I    | 0 | 60  | N | Pass        |
| 566415 | F | Somalia Re Lower Than      | 0 | 60  | N | Pass        |
| 566720 | F | Tigrai Region Lower Than   | 0 | 60  | N | Pass        |
| 566813 | F | Addis Abat A Level or I    | 0 | 60  | N | Pass        |
| 566814 | F | Tigrai Region A Level or I | 0 | 60  | N | Pass        |
| 567013 | M | Addis Abat Lower Than      | 0 | 60  | Y | Fail        |
| 567033 | F | Sidamo Re A Level or I     | 0 | 120 | Y | Distinction |
| 567059 | F | Somalia Re Lower Than      | 0 | 120 | N | Withdrawn   |
| 567145 | F | North Regi Lower Than      | 0 | 60  | N | Withdrawn   |
| 567160 | F | Addis Abat A Level or I    | 0 | 60  | N | Fail        |
| 567262 | M | South Regi HE Qualific     | 0 | 60  | N | Pass        |
| 567363 | F | Addis Abat HE Qualific     | 0 | 90  | N | Pass        |
| 567402 | F | Addis Abat A Level or I    | 0 | 60  | Y | Pass        |
| 567429 | F | Somalia Re Lower Than      | 0 | 60  | N | Pass        |
| 567500 | F | South Wes A Level or I     | 0 | 60  | N | Distinction |
| 567598 | F | Amhara Re Lower Than       | 0 | 120 | N | Withdrawn   |
| 567627 | F | Tigrai Region Lower Than   | 0 | 120 | N | Pass        |
| 567754 | F | Somalia Re A Level or I    | 0 | 120 | N | Pass        |
| 567915 | F | South Regi A Level or I    | 0 | 60  | N | Fail        |
| 567925 | F | Amhara Re Lower Than       | 0 | 60  | N | Withdrawn   |
| 567929 | F | Sidamo Re A Level or I     | 0 | 60  | N | Fail        |
| 567958 | M | South Regi Lower Than      | 0 | 60  | Y | Pass        |
| 567979 | F | Afar Region A Level or I   | 0 | 60  | N | Pass        |
| 568074 | F | Tigrai Region A Level or I | 0 | 120 | N | Pass        |
| 568293 | F | Sidamo Re HE Qualific      | 0 | 120 | N | Withdrawn   |
| 568370 | F | South Regi A Level or I    | 0 | 120 | N | Withdrawn   |
| 568474 | F | South Regi A Level or I    | 0 | 120 | N | Pass        |
| 568502 | F | Sidamo Re HE Qualific      | 0 | 120 | N | Pass        |
| 568523 | F | Amhara Re Lower Than       | 0 | 60  | N | Withdrawn   |
| 568533 | F | Amhara Re Lower Than       | 0 | 90  | N | Distinction |
| 568609 | M | Sidamo Re HE Qualific      | 0 | 60  | N | Withdrawn   |
| 568775 | F | Somalia Re Lower Than      | 0 | 60  | N | Withdrawn   |
| 569035 | F | Addis Abat A Level or I    | 0 | 60  | N | Pass        |
| 569141 | F | Tigrai Region Lower Than   | 0 | 60  | N | Pass        |
| 569334 | F | South Regi A Level or I    | 0 | 120 | N | Fail        |
| 569426 | F | Sidamo Re Lower Than       | 0 | 60  | N | Withdrawn   |
| 569854 | F | South Regi A Level or I    | 0 | 60  | N | Pass        |
| 569862 | M | Oromia Re HE Qualific      | 0 | 60  | N | Pass        |
| 569930 | F | Sidamo Re A Level or I     | 0 | 90  | N | Pass        |
| 570137 | F | Afar Region Lower Than     | 0 | 60  | N | Pass        |
| 570157 | F | Amhara Re A Level or I     | 0 | 60  | N | Pass        |
| 570168 | F | South Wes No Formal        | 0 | 90  | N | Pass        |

|        |   |                          |   |     |   |             |
|--------|---|--------------------------|---|-----|---|-------------|
| 570177 | F | South Wes Lower Tha      | 0 | 180 | N | Withdrawn   |
| 570271 | F | South Regi A Level or I  | 0 | 120 | N | Pass        |
| 570287 | F | South Wes Lower Tha      | 0 | 75  | N | Pass        |
| 570351 | M | South Regi A Level or I  | 0 | 60  | N | Pass        |
| 570519 | F | Somalia Re A Level or I  | 0 | 60  | N | Fail        |
| 570623 | F | North Regi A Level or I  | 0 | 60  | N | Pass        |
| 570759 | F | Sidamo Re A Level or I   | 0 | 60  | N | Pass        |
| 570783 | F | South Regi Lower Tha     | 0 | 60  | N | Pass        |
| 570862 | F | South Wes Lower Tha      | 0 | 120 | N | Withdrawn   |
| 570864 | F | Tigrai Regi Lower Tha    | 0 | 60  | N | Pass        |
| 570970 | M | Sidamo Re Lower Tha      | 0 | 105 | Y | Withdrawn   |
| 571083 | F | Sidamo Re A Level or I   | 0 | 60  | N | Pass        |
| 571143 | F | North Regi A Level or I  | 0 | 75  | N | Fail        |
| 571441 | F | Afar Regi HE Qualific    | 0 | 60  | N | Pass        |
| 571503 | F | Tigrai Regi Lower Tha    | 0 | 60  | N | Pass        |
| 571516 | F | South Regi A Level or I  | 0 | 60  | N | Pass        |
| 571540 | F | Addis Abak Lower Tha     | 0 | 135 | N | Withdrawn   |
| 571554 | M | Sidamo Re A Level or I   | 0 | 60  | N | Pass        |
| 571601 | F | South Regi Lower Tha     | 0 | 60  | N | Withdrawn   |
| 571672 | F | Amhara Re Lower Tha      | 0 | 60  | N | Fail        |
| 571681 | F | South Wes HE Qualific    | 0 | 60  | N | Pass        |
| 571693 | F | Tigrai Regi Lower Tha    | 0 | 60  | N | Fail        |
| 571770 | F | Addis Abak Lower Tha     | 0 | 90  | N | Withdrawn   |
| 571779 | F | Somalia Re A Level or I  | 0 | 60  | N | Pass        |
| 571794 | F | Somalia Re A Level or I  | 0 | 60  | N | Withdrawn   |
| 571871 | F | Oromia Re A Level or I   | 0 | 120 | N | Pass        |
| 571885 | F | Afar Regi Lower Tha      | 0 | 60  | N | Pass        |
| 571907 | F | Afar Regi A Level or I   | 0 | 60  | N | Pass        |
| 572029 | F | Amhara Re Lower Tha      | 0 | 120 | N | Withdrawn   |
| 572051 | F | Addis Abak A Level or I  | 0 | 60  | N | Pass        |
| 572054 | F | Sidamo Re Lower Tha      | 0 | 60  | N | Withdrawn   |
| 572067 | F | North Regi A Level or I  | 0 | 60  | N | Pass        |
| 572103 | F | South Regi A Level or I  | 0 | 60  | N | Pass        |
| 572131 | F | South Wes A Level or I   | 0 | 120 | N | Fail        |
| 572163 | F | Tigrai Regi Lower Tha    | 0 | 60  | N | Withdrawn   |
| 572173 | F | Amhara Re Lower Tha      | 0 | 120 | N | Fail        |
| 572277 | M | Afar Regi A Level or I   | 0 | 60  | N | Fail        |
| 572302 | M | Oromia Re Lower Tha      | 0 | 120 | N | Withdrawn   |
| 572416 | F | Sidamo Re A Level or I   | 0 | 60  | Y | Pass        |
| 572436 | F | Amhara Re A Level or I   | 0 | 180 | N | Distinction |
| 572447 | F | Tigrai Regi A Level or I | 0 | 60  | N | Pass        |
| 572495 | F | Sidamo Re A Level or I   | 0 | 120 | N | Withdrawn   |
| 572504 | F | Sidamo Re A Level or I   | 0 | 60  | N | Pass        |
| 572508 | F | South Regi Lower Tha     | 0 | 60  | N | Pass        |
| 572514 | F | Tigrai Regi A Level or I | 0 | 60  | N | Fail        |
| 572626 | F | Sidamo Re A Level or I   | 0 | 60  | N | Withdrawn   |
| 572733 | F | Amhara Re A Level or I   | 0 | 120 | N | Pass        |

|        |   |             |              |   |     |   |             |
|--------|---|-------------|--------------|---|-----|---|-------------|
| 572739 | F | Tigrai Regi | Lower Tha    | 0 | 120 | N | Withdrawn   |
| 572752 | F | Sidamo Re   | HE Qualific  | 0 | 60  | N | Pass        |
| 572765 | F | North Regi  | Lower Tha    | 0 | 60  | N | Pass        |
| 572770 | F | Somalia Re  | Lower Tha    | 0 | 120 | N | Withdrawn   |
| 572898 | F | Tigrai Regi | A Level or I | 0 | 120 | N | Distinction |
| 572918 | F | South Regi  | A Level or I | 0 | 120 | N | Fail        |
| 572937 | F | Amhara Re   | A Level or I | 0 | 60  | N | Fail        |
| 573043 | F | Addis Abat  | A Level or I | 0 | 60  | N | Pass        |
| 573063 | F | North Regi  | Lower Tha    | 0 | 60  | N | Pass        |
| 573159 | F | South Regi  | A Level or I | 0 | 120 | N | Withdrawn   |
| 573208 | F | Tigrai Regi | Lower Tha    | 0 | 60  | Y | Pass        |
| 573217 | F | South Regi  | Lower Tha    | 0 | 120 | N | Fail        |
| 573223 | M | South Wes   | A Level or I | 0 | 60  | N | Fail        |
| 573225 | F | Tigrai Regi | Lower Tha    | 0 | 60  | N | Fail        |
| 573275 | F | Tigrai Regi | Lower Tha    | 0 | 60  | Y | Fail        |
| 573321 | F | Afar Regioi | Lower Tha    | 0 | 60  | N | Fail        |
| 573409 | F | Sidamo Re   | A Level or I | 0 | 120 | Y | Withdrawn   |
| 573411 | F | Amhara Re   | A Level or I | 0 | 60  | N | Pass        |
| 573431 | F | South Regi  | A Level or I | 0 | 60  | N | Withdrawn   |
| 573433 | F | Tigrai Regi | HE Qualific  | 0 | 60  | N | Pass        |
| 573441 | F | Sidamo Re   | Lower Tha    | 0 | 60  | N | Withdrawn   |
| 573453 | F | South Regi  | Lower Tha    | 0 | 60  | N | Pass        |
| 573485 | F | Sidamo Re   | Lower Tha    | 0 | 120 | N | Withdrawn   |
| 573487 | F | Sidamo Re   | Lower Tha    | 0 | 90  | N | Fail        |
| 573519 | F | Oromia Re   | A Level or I | 0 | 60  | N | Distinction |
| 573578 | F | Addis Abat  | A Level or I | 0 | 60  | N | Pass        |
| 573654 | F | South Regi  | A Level or I | 0 | 60  | N | Pass        |
| 573683 | M | South Regi  | A Level or I | 0 | 60  | N | Withdrawn   |
| 573694 | F | Tigrai Regi | A Level or I | 0 | 180 | N | Withdrawn   |
| 573758 | F | Amhara Re   | Lower Tha    | 0 | 60  | N | Withdrawn   |
| 573777 | F | Addis Abat  | A Level or I | 0 | 120 | N | Pass        |
| 573790 | F | Tigrai Regi | HE Qualific  | 0 | 60  | N | Pass        |
| 573810 | F | Sidamo Re   | Lower Tha    | 0 | 120 | N | Withdrawn   |
| 573821 | F | South Regi  | A Level or I | 0 | 60  | N | Pass        |
| 573831 | F | Somalia Re  | Lower Tha    | 0 | 60  | Y | Pass        |
| 573893 | F | Addis Abat  | HE Qualific  | 0 | 60  | N | Fail        |
| 573986 | F | South Regi  | Lower Tha    | 0 | 60  | N | Pass        |
| 574002 | F | South Regi  | Lower Tha    | 0 | 120 | N | Fail        |
| 574051 | F | Tigrai Regi | Lower Tha    | 0 | 120 | N | Fail        |
| 574053 | M | Amhara Re   | Lower Tha    | 0 | 60  | N | Withdrawn   |
| 574065 | F | South Wes   | A Level or I | 0 | 120 | N | Distinction |
| 574125 | F | South Regi  | A Level or I | 0 | 120 | N | Pass        |
| 574146 | F | Addis Abat  | Lower Tha    | 0 | 60  | N | Withdrawn   |
| 574194 | F | Amhara Re   | A Level or I | 0 | 60  | N | Pass        |
| 574212 | F | Afar Regioi | A Level or I | 0 | 60  | N | Distinction |
| 574250 | F | Addis Abat  | Lower Tha    | 0 | 60  | N | Pass        |
| 574276 | F | Amhara Re   | Lower Tha    | 0 | 120 | N | Withdrawn   |

|        |   |                           |   |     |   |             |
|--------|---|---------------------------|---|-----|---|-------------|
| 574319 | F | North Regi Lower Tha      | 0 | 120 | N | Withdrawn   |
| 574320 | M | Afar Regioi A Level or I  | 0 | 60  | N | Distinction |
| 574348 | F | Addis Abak A Level or I   | 0 | 120 | Y | Pass        |
| 574549 | F | Afar Regioi Lower Tha     | 0 | 60  | N | Pass        |
| 574591 | F | Amhara Re Lower Tha       | 0 | 180 | N | Withdrawn   |
| 574648 | F | Addis Abak A Level or I   | 0 | 60  | N | Distinction |
| 574674 | F | Addis Abak A Level or I   | 0 | 60  | N | Withdrawn   |
| 574708 | M | Tigrai Regio Lower Tha    | 0 | 60  | Y | Fail        |
| 574727 | F | Amhara Re Lower Tha       | 0 | 60  | N | Withdrawn   |
| 574766 | F | South Regi A Level or I   | 0 | 120 | N | Fail        |
| 574783 | F | Addis Abak No Formal      | 0 | 60  | N | Withdrawn   |
| 574810 | F | Tigrai Regio A Level or I | 0 | 60  | N | Withdrawn   |
| 574962 | F | South Regi Lower Tha      | 0 | 120 | N | Withdrawn   |
| 574973 | F | South Regi A Level or I   | 0 | 180 | N | Pass        |
| 574998 | F | Addis Abak Lower Tha      | 0 | 120 | N | Withdrawn   |
| 575018 | F | Tigrai Regio Lower Tha    | 0 | 60  | N | Pass        |
| 575089 | F | South Wes A Level or I    | 0 | 120 | N | Fail        |
| 575100 | F | Sidamo Re Lower Tha       | 0 | 120 | N | Fail        |
| 575124 | M | South Regi Lower Tha      | 0 | 120 | N | Pass        |
| 575207 | M | Addis Abak Lower Tha      | 0 | 120 | N | Withdrawn   |
| 575281 | F | South Regi Lower Tha      | 0 | 60  | N | Fail        |
| 575290 | M | Afar Regioi Lower Tha     | 0 | 120 | Y | Pass        |
| 575387 | F | South Regi Lower Tha      | 0 | 60  | N | Pass        |
| 575421 | F | Sidamo Re A Level or I    | 0 | 60  | N | Withdrawn   |
| 575423 | F | South Regi A Level or I   | 0 | 180 | N | Withdrawn   |
| 575480 | F | Tigrai Regio Lower Tha    | 0 | 60  | N | Fail        |
| 575520 | F | Sidamo Re Lower Tha       | 0 | 180 | N | Withdrawn   |
| 575560 | F | Addis Abak A Level or I   | 0 | 60  | N | Distinction |
| 575672 | F | North Regi Lower Tha      | 0 | 60  | N | Withdrawn   |
| 575681 | F | Amhara Re Lower Tha       | 0 | 60  | N | Pass        |
| 575794 | F | Tigrai Regio HE Qualific  | 0 | 60  | N | Withdrawn   |
| 575897 | F | Afar Regioi Lower Tha     | 0 | 60  | N | Fail        |
| 575927 | F | Somalia Re HE Qualific    | 0 | 120 | N | Withdrawn   |
| 575929 | F | South Regi Lower Tha      | 0 | 120 | N | Fail        |
| 575930 | F | Addis Abak Lower Tha      | 0 | 60  | N | Pass        |
| 575982 | M | Tigrai Regio A Level or I | 0 | 60  | N | Fail        |
| 575992 | F | Sidamo Re A Level or I    | 0 | 120 | N | Withdrawn   |
| 576046 | F | Sidamo Re A Level or I    | 0 | 120 | N | Withdrawn   |
| 576098 | F | Somalia Re Lower Tha      | 0 | 120 | N | Withdrawn   |
| 576158 | F | Tigrai Regio Lower Tha    | 0 | 120 | N | Pass        |
| 576226 | F | South Wes HE Qualific     | 0 | 60  | N | Fail        |
| 576375 | F | Amhara Re Lower Tha       | 0 | 120 | N | Withdrawn   |
| 576483 | F | South Regi A Level or I   | 0 | 60  | N | Pass        |
| 576513 | M | South Regi Lower Tha      | 0 | 60  | N | Withdrawn   |
| 576524 | F | Afar Regioi A Level or I  | 0 | 60  | N | Fail        |
| 576550 | F | Amhara Re A Level or I    | 0 | 180 | N | Withdrawn   |
| 576600 | F | Sidamo Re HE Qualific     | 0 | 60  | N | Pass        |

|        |   |                          |   |     |   |             |
|--------|---|--------------------------|---|-----|---|-------------|
| 576664 | F | North Regi A Level or I  | 0 | 60  | N | Withdrawn   |
| 576714 | M | South Wes Lower Thar     | 0 | 60  | N | Withdrawn   |
| 576815 | F | Amhara Re Lower Thar     | 0 | 60  | N | Fail        |
| 576841 | M | Sidamo Re Lower Thar     | 0 | 120 | N | Pass        |
| 576882 | F | Amhara Re Lower Thar     | 0 | 150 | N | Fail        |
| 576935 | F | Somalia Re A Level or I  | 0 | 180 | N | Fail        |
| 576940 | F | South Regi A Level or I  | 0 | 60  | N | Pass        |
| 576946 | F | South Wes A Level or I   | 0 | 60  | N | Pass        |
| 576947 | F | Tigrai Regi Lower Thar   | 0 | 60  | N | Fail        |
| 576981 | F | North Regi A Level or I  | 0 | 60  | N | Pass        |
| 576983 | F | Tigrai Regi Lower Thar   | 0 | 60  | N | Withdrawn   |
| 576985 | F | Oromia Re Lower Thar     | 0 | 120 | N | Withdrawn   |
| 576996 | F | Somalia Re Lower Thar    | 0 | 120 | N | Withdrawn   |
| 577007 | F | Addis Abak Lower Thar    | 0 | 60  | Y | Withdrawn   |
| 577049 | F | South Wes Lower Thar     | 0 | 60  | N | Withdrawn   |
| 577069 | F | Sidamo Re HE Qualific    | 0 | 60  | N | Distinction |
| 577096 | F | Amhara Re A Level or I   | 0 | 120 | N | Distinction |
| 577099 | F | South Regi Lower Thar    | 0 | 60  | N | Pass        |
| 577215 | F | Somalia Re HE Qualific   | 0 | 60  | N | Withdrawn   |
| 577239 | F | Tigrai Regi Lower Thar   | 0 | 60  | N | Withdrawn   |
| 577256 | F | South Regi A Level or I  | 0 | 120 | N | Pass        |
| 577280 | F | Tigrai Regi A Level or I | 0 | 150 | N | Pass        |
| 577286 | M | Addis Abak Lower Thar    | 0 | 120 | N | Pass        |
| 577347 | F | South Wes Lower Thar     | 0 | 60  | N | Fail        |
| 577376 | F | South Wes A Level or I   | 0 | 90  | Y | Pass        |
| 577449 | M | South Wes Lower Thar     | 0 | 60  | N | Withdrawn   |
| 577498 | F | South Regi Lower Thar    | 0 | 60  | N | Fail        |
| 577648 | F | Amhara Re Lower Thar     | 0 | 120 | N | Fail        |
| 577659 | F | South Wes Lower Thar     | 0 | 60  | N | Withdrawn   |
| 577680 | F | Afar Regioi Lower Thar   | 0 | 60  | N | Pass        |
| 577692 | F | South Regi Lower Thar    | 0 | 120 | N | Fail        |
| 577695 | F | South Wes A Level or I   | 0 | 120 | N | Withdrawn   |
| 577824 | F | South Regi A Level or I  | 0 | 60  | N | Distinction |
| 577905 | F | South Wes Lower Thar     | 0 | 120 | N | Withdrawn   |
| 577914 | F | Oromia Re A Level or I   | 0 | 120 | N | Distinction |
| 577915 | F | Afar Regioi Lower Thar   | 0 | 60  | N | Pass        |
| 577949 | M | South Regi Lower Thar    | 0 | 120 | N | Fail        |
| 577965 | F | Sidamo Re A Level or I   | 0 | 120 | N | Withdrawn   |
| 577980 | F | South Regi A Level or I  | 0 | 150 | N | Pass        |
| 577992 | M | South Regi HE Qualific   | 0 | 120 | N | Withdrawn   |
| 578030 | F | South Regi A Level or I  | 0 | 120 | N | Distinction |
| 578057 | F | Oromia Re Lower Thar     | 0 | 60  | N | Fail        |
| 578062 | F | South Regi Lower Thar    | 0 | 60  | N | Fail        |
| 578109 | F | Afar Regioi A Level or I | 0 | 60  | N | Distinction |
| 578197 | F | South Regi Lower Thar    | 0 | 120 | N | Pass        |
| 578264 | F | Amhara Re HE Qualific    | 0 | 120 | Y | Withdrawn   |
| 578362 | F | Addis Abak A Level or I  | 0 | 120 | N | Fail        |

|        |   |                         |   |     |   |             |
|--------|---|-------------------------|---|-----|---|-------------|
| 578447 | M | Oromia Re A Level or I  | 0 | 60  | Y | Pass        |
| 578520 | M | South Wes Lower Tha     | 0 | 60  | N | Fail        |
| 578546 | F | Sidamo Re A Level or I  | 0 | 60  | N | Pass        |
| 578578 | F | Somalia Re A Level or I | 0 | 120 | N | Pass        |
| 578598 | F | South Regi A Level or I | 0 | 120 | N | Withdrawn   |
| 578600 | F | Addis Abak Lower Tha    | 0 | 60  | N | Pass        |
| 578676 | F | Addis Abak Lower Tha    | 0 | 60  | N | Fail        |
| 578717 | F | Addis Abak A Level or I | 0 | 60  | N | Pass        |
| 578739 | F | South Regi A Level or I | 0 | 60  | N | Withdrawn   |
| 578854 | F | Tigrai Regi HE Qualific | 0 | 60  | N | Withdrawn   |
| 578953 | F | Amhara Re Lower Tha     | 0 | 120 | N | Withdrawn   |
| 579046 | F | Oromia Re Lower Tha     | 0 | 60  | N | Withdrawn   |
| 579050 | F | Afar Regio Lower Tha    | 0 | 120 | N | Withdrawn   |
| 579255 | F | Tigrai Regi Lower Tha   | 0 | 135 | N | Withdrawn   |
| 579256 | F | Sidamo Re A Level or I  | 0 | 60  | N | Withdrawn   |
| 579259 | F | Sidamo Re Lower Tha     | 0 | 120 | N | Withdrawn   |
| 579279 | F | Somalia Re Lower Tha    | 0 | 60  | N | Pass        |
| 579300 | F | Oromia Re Lower Tha     | 0 | 60  | N | Withdrawn   |
| 579316 | F | South Regi A Level or I | 0 | 60  | N | Pass        |
| 579448 | F | Afar Regio Lower Tha    | 0 | 120 | N | Withdrawn   |
| 579486 | M | Addis Abak Lower Tha    | 0 | 60  | N | Withdrawn   |
| 579549 | F | Amhara Re A Level or I  | 0 | 60  | N | Pass        |
| 579571 | F | Sidamo Re Lower Tha     | 0 | 60  | N | Pass        |
| 579575 | F | South Wes Lower Tha     | 0 | 75  | N | Pass        |
| 579619 | F | South Wes Lower Tha     | 0 | 90  | N | Pass        |
| 579718 | F | Tigrai Regi Lower Tha   | 0 | 60  | N | Fail        |
| 579762 | F | Somalia Re HE Qualific  | 0 | 60  | N | Pass        |
| 580094 | F | North Regi Lower Tha    | 0 | 120 | N | Pass        |
| 580314 | F | Amhara Re A Level or I  | 0 | 60  | N | Fail        |
| 580328 | M | South Regi Lower Tha    | 0 | 60  | N | Withdrawn   |
| 580346 | F | Oromia Re A Level or I  | 0 | 60  | N | Pass        |
| 580360 | F | Addis Abak Lower Tha    | 0 | 60  | N | Pass        |
| 580412 | F | North Regi Lower Tha    | 0 | 120 | N | Withdrawn   |
| 580497 | F | Amhara Re A Level or I  | 0 | 60  | N | Withdrawn   |
| 580540 | F | Oromia Re A Level or I  | 0 | 120 | Y | Pass        |
| 580592 | F | South Regi Lower Tha    | 0 | 60  | N | Withdrawn   |
| 580612 | F | North Regi Lower Tha    | 0 | 60  | N | Pass        |
| 580646 | F | Sidamo Re A Level or I  | 0 | 60  | N | Distinction |
| 580654 | F | South Regi HE Qualific  | 0 | 120 | N | Withdrawn   |
| 580684 | F | Amhara Re A Level or I  | 0 | 120 | N | Fail        |
| 580854 | F | Addis Abak Lower Tha    | 0 | 60  | N | Withdrawn   |
| 580880 | M | South Wes A Level or I  | 0 | 75  | N | Pass        |
| 580883 | F | South Wes HE Qualific   | 0 | 60  | N | Pass        |
| 580960 | F | South Wes A Level or I  | 0 | 120 | N | Pass        |
| 580975 | F | South Wes HE Qualific   | 0 | 60  | N | Fail        |
| 581016 | F | Oromia Re Lower Tha     | 0 | 60  | N | Withdrawn   |
| 581027 | F | Tigrai Regi Lower Tha   | 0 | 90  | N | Fail        |

|        |   |                          |   |     |   |             |
|--------|---|--------------------------|---|-----|---|-------------|
| 581038 | F | Somalia Re Lower Tha     | 0 | 120 | N | Fail        |
| 581139 | F | Sidamo Re Lower Tha      | 0 | 60  | N | Pass        |
| 581235 | F | South Regi Lower Tha     | 0 | 120 | N | Withdrawn   |
| 581305 | F | Somalia Re A Level or I  | 0 | 60  | N | Fail        |
| 581431 | F | South Wes Lower Tha      | 0 | 75  | N | Fail        |
| 581492 | F | Tigrai Regi Lower Tha    | 0 | 75  | N | Withdrawn   |
| 581493 | F | Tigrai Regi A Level or I | 0 | 75  | N | Withdrawn   |
| 581530 | F | Afar Regio A Level or I  | 0 | 60  | N | Pass        |
| 581586 | F | South Regi HE Qualific   | 0 | 120 | N | Pass        |
| 581625 | F | Afar Regio Lower Tha     | 0 | 60  | N | Fail        |
| 581657 | F | Sidamo Re Lower Tha      | 0 | 60  | N | Pass        |
| 581672 | F | South Regi Lower Tha     | 0 | 60  | N | Withdrawn   |
| 581826 | M | Tigrai Regi A Level or I | 0 | 60  | Y | Withdrawn   |
| 581959 | F | Sidamo Re Lower Tha      | 0 | 120 | N | Withdrawn   |
| 582084 | F | Sidamo Re A Level or I   | 0 | 120 | N | Withdrawn   |
| 582093 | F | Somalia Re Lower Tha     | 0 | 60  | N | Fail        |
| 582123 | F | South Wes A Level or I   | 0 | 60  | N | Pass        |
| 582182 | M | Tigrai Regi Lower Tha    | 0 | 120 | N | Fail        |
| 582184 | F | Amhara Re Lower Tha      | 0 | 120 | N | Withdrawn   |
| 582190 | F | Addis Abak Lower Tha     | 0 | 60  | N | Fail        |
| 582218 | F | South Regi A Level or I  | 0 | 120 | N | Fail        |
| 582243 | F | South Wes Lower Tha      | 0 | 60  | N | Withdrawn   |
| 582301 | F | Tigrai Regi Lower Tha    | 0 | 60  | N | Fail        |
| 582305 | M | Tigrai Regi Lower Tha    | 0 | 120 | N | Pass        |
| 582333 | F | Addis Abak A Level or I  | 0 | 120 | N | Distinction |
| 582390 | F | South Wes A Level or I   | 0 | 60  | N | Pass        |
| 582394 | F | Tigrai Regi A Level or I | 0 | 75  | N | Pass        |
| 582404 | F | Sidamo Re Lower Tha      | 0 | 60  | N | Withdrawn   |
| 582406 | F | Tigrai Regi A Level or I | 0 | 60  | N | Pass        |
| 582439 | F | South Regi A Level or I  | 0 | 60  | N | Fail        |
| 582443 | F | Sidamo Re A Level or I   | 0 | 60  | N | Withdrawn   |
| 582446 | F | Sidamo Re HE Qualific    | 0 | 60  | N | Pass        |
| 582469 | M | Sidamo Re HE Qualific    | 0 | 120 | N | Withdrawn   |
| 582474 | F | Sidamo Re A Level or I   | 0 | 60  | N | Pass        |
| 582574 | F | Afar Regio Lower Tha     | 0 | 60  | N | Pass        |
| 582578 | F | Somalia Re Lower Tha     | 0 | 60  | N | Pass        |
| 582591 | F | Amhara Re Lower Tha      | 0 | 120 | N | Fail        |
| 582636 | F | North Regi A Level or I  | 0 | 60  | N | Pass        |
| 582650 | F | Sidamo Re A Level or I   | 0 | 60  | N | Pass        |
| 582806 | F | Sidamo Re HE Qualific    | 0 | 60  | Y | Withdrawn   |
| 582833 | M | Tigrai Regi Lower Tha    | 0 | 60  | N | Fail        |
| 582878 | F | Amhara Re A Level or I   | 0 | 60  | Y | Pass        |
| 582940 | F | Oromia Re Lower Tha      | 0 | 60  | N | Pass        |
| 582958 | F | Tigrai Regi HE Qualific  | 0 | 180 | N | Distinction |
| 582963 | F | South Wes A Level or I   | 0 | 120 | N | Withdrawn   |
| 582975 | F | Addis Abak A Level or I  | 0 | 60  | N | Pass        |
| 583007 | M | Tigrai Regi Lower Tha    | 0 | 60  | Y | Fail        |



|        |   |                          |   |     |   |             |
|--------|---|--------------------------|---|-----|---|-------------|
| 583012 | F | South Regi Lower Tha     | 0 | 60  | Y | Pass        |
| 583021 | F | Afar Regio A Level or I  | 0 | 60  | N | Withdrawn   |
| 583039 | F | Somalia Re A Level or I  | 0 | 60  | N | Pass        |
| 583065 | F | Sidamo Re HE Qualific    | 0 | 60  | N | Withdrawn   |
| 583098 | F | Somalia Re Lower Tha     | 0 | 60  | N | Fail        |
| 583113 | F | Afar Regio A Level or I  | 0 | 120 | N | Fail        |
| 583142 | F | Addis Abak Lower Tha     | 0 | 60  | N | Withdrawn   |
| 583170 | M | South Wes A Level or I   | 0 | 60  | N | Distinction |
| 583179 | F | Sidamo Re Lower Tha      | 0 | 60  | N | Withdrawn   |
| 583191 | F | Sidamo Re A Level or I   | 0 | 60  | N | Pass        |
| 583235 | F | Addis Abak Lower Tha     | 0 | 60  | N | Withdrawn   |
| 583240 | F | Oromia Re A Level or I   | 0 | 120 | Y | Fail        |
| 583255 | F | South Regi Lower Tha     | 0 | 60  | N | Withdrawn   |
| 583301 | F | South Regi Lower Tha     | 0 | 120 | N | Fail        |
| 583333 | F | Sidamo Re A Level or I   | 0 | 60  | N | Withdrawn   |
| 583367 | F | Sidamo Re A Level or I   | 0 | 60  | N | Fail        |
| 583429 | M | Addis Abak HE Qualific   | 0 | 90  | N | Withdrawn   |
| 583433 | F | Afar Regio HE Qualific   | 0 | 60  | N | Pass        |
| 583459 | F | Oromia Re Lower Tha      | 0 | 120 | N | Pass        |
| 583473 | M | South Regi Lower Tha     | 0 | 120 | N | Pass        |
| 583534 | F | Amhara Re A Level or I   | 0 | 60  | N | Fail        |
| 583598 | F | South Regi Lower Tha     | 0 | 60  | N | Fail        |
| 583609 | F | Addis Abak Lower Tha     | 0 | 90  | N | Pass        |
| 583645 | F | Somalia Re A Level or I  | 0 | 90  | N | Pass        |
| 583708 | F | Addis Abak A Level or I  | 0 | 60  | N | Pass        |
| 583832 | F | Addis Abak Lower Tha     | 0 | 60  | N | Withdrawn   |
| 583873 | M | Amhara Re Lower Tha      | 0 | 180 | N | Pass        |
| 583964 | F | Sidamo Re Lower Tha      | 0 | 60  | N | Pass        |
| 583967 | F | Somalia Re Lower Tha     | 0 | 60  | N | Withdrawn   |
| 583970 | F | Somalia Re A Level or I  | 0 | 60  | N | Distinction |
| 583977 | M | Afar Regio A Level or I  | 0 | 60  | N | Fail        |
| 584042 | F | South Wes Lower Tha      | 0 | 120 | N | Pass        |
| 584178 | F | Sidamo Re A Level or I   | 0 | 60  | N | Pass        |
| 584223 | F | South Regi A Level or I  | 0 | 60  | N | Withdrawn   |
| 584238 | F | South Regi Lower Tha     | 0 | 60  | N | Fail        |
| 584325 | F | Tigrai Regi Lower Tha    | 0 | 60  | N | Withdrawn   |
| 584342 | F | South Regi Lower Tha     | 0 | 60  | N | Withdrawn   |
| 584374 | F | Addis Abak Lower Tha     | 0 | 60  | N | Withdrawn   |
| 584408 | F | Somalia Re Lower Tha     | 0 | 60  | N | Fail        |
| 584534 | F | Sidamo Re Lower Tha      | 0 | 120 | Y | Withdrawn   |
| 584580 | F | South Wes Lower Tha      | 0 | 60  | N | Pass        |
| 584588 | F | Amhara Re Lower Tha      | 0 | 60  | N | Withdrawn   |
| 584611 | F | Somalia Re A Level or I  | 0 | 120 | N | Fail        |
| 584676 | F | South Regi A Level or I  | 0 | 120 | N | Withdrawn   |
| 584735 | M | Tigrai Regi A Level or I | 0 | 60  | N | Withdrawn   |
| 584762 | F | Addis Abak Lower Tha     | 0 | 120 | N | Withdrawn   |
| 584766 | F | South Wes A Level or I   | 0 | 120 | N | Pass        |

|        |   |                          |   |     |   |             |
|--------|---|--------------------------|---|-----|---|-------------|
| 584813 | M | Oromia Re A Level or I   | 0 | 60  | N | Pass        |
| 584892 | F | South Regi Lower Tha     | 0 | 60  | N | Withdrawn   |
| 585004 | F | North Regi Lower Tha     | 0 | 120 | N | Withdrawn   |
| 585074 | F | Sidamo Re Lower Tha      | 0 | 60  | N | Fail        |
| 585170 | M | South Regi Lower Tha     | 0 | 60  | N | Pass        |
| 585200 | F | Oromia Re Lower Tha      | 0 | 60  | N | Distinction |
| 585212 | F | South Regi A Level or I  | 0 | 120 | N | Pass        |
| 585342 | F | Sidamo Re Lower Tha      | 0 | 120 | N | Withdrawn   |
| 585355 | F | Addis Abak Lower Tha     | 0 | 60  | N | Fail        |
| 585406 | F | Afar Regio Lower Tha     | 0 | 60  | N | Pass        |
| 585459 | F | Oromia Re Lower Tha      | 0 | 60  | N | Withdrawn   |
| 585461 | F | South Regi A Level or I  | 0 | 60  | N | Withdrawn   |
| 585603 | F | Tigrai Regi A Level or I | 0 | 60  | N | Pass        |
| 585611 | F | Afar Regio HE Qualific   | 0 | 60  | N | Pass        |
| 585618 | F | South Regi Lower Tha     | 0 | 60  | N | Withdrawn   |
| 585644 | M | Addis Abak Lower Tha     | 0 | 120 | N | Pass        |
| 585652 | M | South Regi Lower Tha     | 0 | 60  | N | Pass        |
| 585693 | F | Oromia Re Lower Tha      | 0 | 60  | N | Pass        |
| 585764 | F | Somalia Re Lower Tha     | 0 | 60  | Y | Withdrawn   |
| 585779 | F | Somalia Re Lower Tha     | 0 | 60  | N | Pass        |
| 585790 | F | Oromia Re HE Qualific    | 0 | 120 | N | Fail        |
| 585816 | F | Oromia Re Lower Tha      | 0 | 120 | N | Fail        |
| 585915 | F | South Wes A Level or I   | 0 | 60  | Y | Fail        |
| 585963 | F | Somalia Re A Level or I  | 0 | 60  | Y | Fail        |
| 586072 | F | Tigrai Regi Lower Tha    | 0 | 60  | N | Fail        |
| 586078 | F | South Wes A Level or I   | 0 | 60  | N | Pass        |
| 586145 | F | Somalia Re A Level or I  | 0 | 60  | N | Fail        |
| 586165 | F | Somalia Re A Level or I  | 0 | 120 | N | Fail        |
| 586346 | F | Amhara Re A Level or I   | 0 | 120 | N | Pass        |
| 586393 | F | South Regi Lower Tha     | 0 | 60  | N | Fail        |
| 586407 | F | South Wes Lower Tha      | 0 | 90  | N | Withdrawn   |
| 586416 | F | South Wes HE Qualific    | 0 | 60  | N | Pass        |
| 586440 | F | Sidamo Re Lower Tha      | 0 | 60  | N | Pass        |
| 586450 | F | South Regi HE Qualific   | 0 | 60  | N | Withdrawn   |
| 586490 | F | South Wes Lower Tha      | 0 | 120 | N | Fail        |
| 586516 | F | Oromia Re A Level or I   | 0 | 60  | N | Withdrawn   |
| 586535 | F | South Regi Lower Tha     | 0 | 120 | Y | Pass        |
| 586581 | F | South Regi A Level or I  | 0 | 60  | N | Pass        |
| 586720 | M | Sidamo Re Lower Tha      | 0 | 120 | N | Fail        |
| 586742 | F | Oromia Re A Level or I   | 0 | 120 | N | Pass        |
| 586836 | F | South Regi Lower Tha     | 0 | 60  | N | Fail        |
| 586843 | F | Addis Abak A Level or I  | 0 | 60  | N | Pass        |
| 586854 | F | Oromia Re A Level or I   | 0 | 120 | N | Withdrawn   |
| 586882 | F | Sidamo Re Lower Tha      | 0 | 120 | N | Fail        |
| 586890 | F | North Regi A Level or I  | 0 | 60  | N | Withdrawn   |
| 586928 | F | South Regi Lower Tha     | 0 | 120 | N | Fail        |
| 586975 | F | Addis Abak A Level or I  | 0 | 120 | Y | Withdrawn   |

|        |   |             |              |   |     |   |             |
|--------|---|-------------|--------------|---|-----|---|-------------|
| 586996 | F | Tigrai Regi | A Level or I | 0 | 60  | N | Distinction |
| 587051 | F | Somalia Re  | Lower Thar   | 0 | 60  | N | Fail        |
| 587071 | F | Addis Abak  | Lower Thar   | 0 | 120 | Y | Fail        |
| 587120 | F | Addis Abak  | Lower Thar   | 0 | 180 | N | Withdrawn   |
| 587155 | F | Amhara Re   | Lower Thar   | 0 | 120 | N | Withdrawn   |
| 587192 | F | South Regi  | Lower Thar   | 0 | 60  | N | Pass        |
| 587194 | F | South Regi  | Lower Thar   | 0 | 60  | N | Fail        |
| 587219 | F | South Wes   | A Level or I | 0 | 60  | N | Withdrawn   |
| 587223 | F | South Wes   | A Level or I | 0 | 60  | N | Distinction |
| 587285 | F | Sidamo Re   | Lower Thar   | 0 | 120 | N | Withdrawn   |
| 587297 | F | North Regi  | A Level or I | 0 | 120 | N | Pass        |
| 587349 | F | Somalia Re  | Lower Thar   | 0 | 120 | N | Withdrawn   |
| 587409 | F | Tigrai Regi | A Level or I | 0 | 120 | N | Pass        |
| 587418 | F | Amhara Re   | A Level or I | 0 | 60  | N | Pass        |
| 587423 | F | Sidamo Re   | A Level or I | 0 | 180 | N | Distinction |
| 587564 | F | Sidamo Re   | A Level or I | 0 | 60  | N | Pass        |
| 587623 | F | South Wes   | Lower Thar   | 0 | 60  | N | Withdrawn   |
| 587665 | F | South Wes   | Lower Thar   | 0 | 120 | N | Withdrawn   |
| 587702 | F | South Regi  | A Level or I | 0 | 60  | N | Pass        |
| 587722 | M | Afar Regioi | Post Gradu   | 0 | 60  | N | Distinction |
| 587732 | F | Sidamo Re   | A Level or I | 0 | 60  | N | Pass        |
| 587754 | F | South Regi  | A Level or I | 0 | 60  | N | Pass        |
| 587755 | M | South Regi  | Lower Thar   | 0 | 60  | N | Pass        |
| 587810 | F | Tigrai Regi | Lower Thar   | 0 | 120 | N | Pass        |
| 587824 | F | Sidamo Re   | A Level or I | 0 | 120 | N | Fail        |
| 587838 | F | South Wes   | Lower Thar   | 0 | 60  | N | Withdrawn   |
| 587851 | F | Addis Abak  | Lower Thar   | 0 | 60  | N | Withdrawn   |
| 587923 | F | Afar Regioi | Lower Thar   | 0 | 120 | Y | Pass        |
| 587961 | F | Sidamo Re   | Lower Thar   | 0 | 60  | N | Fail        |
| 587985 | F | Sidamo Re   | Lower Thar   | 0 | 120 | N | Distinction |
| 588117 | F | Oromia Re   | A Level or I | 0 | 60  | N | Distinction |
| 588191 | F | Sidamo Re   | Lower Thar   | 0 | 60  | N | Withdrawn   |
| 588194 | F | Somalia Re  | Lower Thar   | 0 | 60  | N | Withdrawn   |
| 588205 | F | Sidamo Re   | Lower Thar   | 0 | 60  | N | Withdrawn   |
| 588252 | F | South Regi  | Lower Thar   | 0 | 60  | N | Withdrawn   |
| 588265 | F | Somalia Re  | Lower Thar   | 0 | 60  | N | Pass        |
| 588321 | F | Addis Abak  | Lower Thar   | 0 | 60  | N | Withdrawn   |
| 588355 | F | Sidamo Re   | Lower Thar   | 0 | 120 | N | Pass        |
| 588432 | F | South Wes   | A Level or I | 0 | 60  | N | Fail        |
| 588445 | F | Addis Abak  | Lower Thar   | 0 | 120 | N | Withdrawn   |
| 588504 | F | Amhara Re   | Lower Thar   | 0 | 120 | Y | Withdrawn   |
| 588642 | F | Sidamo Re   | A Level or I | 0 | 120 | N | Pass        |
| 588685 | F | Afar Regioi | HE Qualific  | 0 | 120 | Y | Withdrawn   |
| 588691 | F | Somalia Re  | Lower Thar   | 0 | 120 | N | Withdrawn   |
| 588713 | F | Afar Regioi | Lower Thar   | 0 | 60  | N | Fail        |
| 588883 | F | South Wes   | A Level or I | 0 | 60  | N | Distinction |
| 588910 | F | Tigrai Regi | HE Qualific  | 0 | 60  | N | Pass        |

|        |   |                          |   |     |   |             |
|--------|---|--------------------------|---|-----|---|-------------|
| 588969 | F | Oromia Re A Level or I   | 0 | 180 | N | Withdrawn   |
| 589067 | F | South Wes Lower Tha      | 0 | 60  | N | Pass        |
| 589123 | F | South Wes HE Qualific    | 0 | 120 | N | Pass        |
| 589154 | F | Addis Abak HE Qualific   | 0 | 60  | N | Withdrawn   |
| 589216 | M | South Wes A Level or I   | 0 | 180 | N | Withdrawn   |
| 589234 | F | Oromia Re A Level or I   | 0 | 120 | N | Withdrawn   |
| 589239 | F | Sidamo Re Lower Tha      | 0 | 120 | N | Withdrawn   |
| 589296 | M | Amhara Re Lower Tha      | 0 | 90  | N | Pass        |
| 589302 | F | Tigrai Regi A Level or I | 0 | 60  | N | Pass        |
| 589411 | F | Sidamo Re A Level or I   | 0 | 60  | N | Distinction |
| 589471 | F | South Regi Lower Tha     | 0 | 90  | N | Withdrawn   |
| 589508 | F | Oromia Re HE Qualific    | 0 | 60  | Y | Distinction |
| 589509 | F | Afar Regio HE Qualific   | 0 | 90  | N | Pass        |
| 589580 | F | Afar Regio HE Qualific   | 0 | 60  | N | Withdrawn   |
| 589810 | F | South Regi A Level or I  | 0 | 120 | N | Withdrawn   |
| 589903 | F | South Regi A Level or I  | 0 | 60  | N | Pass        |
| 589950 | F | Tigrai Regi Lower Tha    | 0 | 60  | N | Pass        |
| 590107 | F | Sidamo Re Lower Tha      | 0 | 120 | N | Withdrawn   |
| 590202 | F | Afar Regio HE Qualific   | 0 | 60  | N | Pass        |
| 590231 | F | Afar Regio Lower Tha     | 0 | 120 | N | Pass        |
| 590244 | F | Afar Regio HE Qualific   | 0 | 60  | N | Withdrawn   |
| 590305 | F | Sidamo Re HE Qualific    | 0 | 60  | N | Withdrawn   |
| 590308 | F | Somalia Re A Level or I  | 0 | 120 | N | Fail        |
| 590310 | F | Somalia Re Lower Tha     | 0 | 180 | N | Withdrawn   |
| 590325 | F | Afar Regio Lower Tha     | 0 | 60  | N | Pass        |
| 590360 | F | South Wes Lower Tha      | 0 | 60  | N | Fail        |
| 590362 | F | Afar Regio A Level or I  | 0 | 60  | N | Pass        |
| 590365 | F | Afar Regio HE Qualific   | 0 | 60  | N | Fail        |
| 590372 | F | North Regi HE Qualific   | 0 | 120 | N | Pass        |
| 590478 | F | Somalia Re Lower Tha     | 0 | 60  | N | Withdrawn   |
| 590502 | F | Tigrai Regi No Formal    | 0 | 60  | N | Fail        |
| 590625 | F | Tigrai Regi Lower Tha    | 0 | 60  | N | Pass        |
| 590667 | F | South Regi A Level or I  | 0 | 60  | N | Distinction |
| 590668 | F | Sidamo Re Lower Tha      | 0 | 60  | N | Withdrawn   |
| 590713 | F | Somalia Re Lower Tha     | 0 | 60  | N | Withdrawn   |
| 590812 | F | Tigrai Regi Lower Tha    | 0 | 120 | N | Withdrawn   |
| 590867 | M | Sidamo Re A Level or I   | 0 | 90  | N | Fail        |
| 590923 | F | Amhara Re Lower Tha      | 0 | 60  | N | Fail        |
| 590931 | F | South Wes A Level or I   | 0 | 120 | N | Pass        |
| 590994 | F | Afar Regio Lower Tha     | 0 | 60  | N | Distinction |
| 591030 | F | Addis Abak Lower Tha     | 0 | 60  | N | Pass        |
| 591034 | F | South Wes Lower Tha      | 0 | 60  | N | Fail        |
| 591223 | F | Afar Regio HE Qualific   | 0 | 120 | N | Pass        |
| 591257 | F | Tigrai Regi Lower Tha    | 0 | 60  | N | Fail        |
| 591273 | M | Tigrai Regi A Level or I | 0 | 60  | N | Pass        |
| 591299 | F | Tigrai Regi A Level or I | 0 | 60  | N | Distinction |
| 591410 | F | Sidamo Re Lower Tha      | 0 | 60  | N | Fail        |

|        |   |                         |   |     |   |             |
|--------|---|-------------------------|---|-----|---|-------------|
| 591414 | F | South Wes A Level or I  | 0 | 60  | N | Pass        |
| 591420 | F | South Wes A Level or I  | 0 | 60  | N | Pass        |
| 591440 | F | Sidamo Re Lower Tha     | 0 | 60  | N | Fail        |
| 591461 | F | Amhara Re A Level or I  | 0 | 60  | N | Withdrawn   |
| 591501 | F | South Regi A Level or I | 0 | 60  | N | Distinction |
| 591518 | F | Amhara Re A Level or I  | 0 | 60  | N | Distinction |
| 591558 | F | Sidamo Re A Level or I  | 0 | 120 | N | Pass        |
| 591574 | F | North Regi A Level or I | 0 | 120 | N | Pass        |
| 591589 | F | Sidamo Re A Level or I  | 0 | 60  | N | Pass        |
| 591591 | F | South Regi A Level or I | 0 | 120 | N | Fail        |
| 591608 | F | South Regi Lower Tha    | 0 | 60  | N | Fail        |
| 591721 | F | South Regi A Level or I | 0 | 60  | N | Withdrawn   |
| 591785 | M | Tigrai Regi Lower Tha   | 0 | 120 | N | Fail        |
| 591787 | F | Sidamo Re Lower Tha     | 0 | 60  | N | Pass        |
| 591820 | F | Sidamo Re A Level or I  | 0 | 120 | N | Pass        |
| 591895 | F | Tigrai Regi Lower Tha   | 0 | 120 | Y | Withdrawn   |
| 591912 | F | Amhara Re A Level or I  | 0 | 60  | N | Withdrawn   |
| 591937 | F | Somalia Re Lower Tha    | 0 | 60  | N | Withdrawn   |
| 591978 | M | Addis Abak Lower Tha    | 0 | 60  | N | Fail        |
| 591986 | M | South Regi Lower Tha    | 0 | 60  | N | Withdrawn   |
| 592081 | F | Tigrai Regi Lower Tha   | 0 | 60  | N | Fail        |
| 592147 | F | Afar Regio HE Qualific  | 0 | 60  | N | Pass        |
| 592205 | F | South Regi Lower Tha    | 0 | 60  | N | Pass        |
| 592256 | F | Addis Abak Lower Tha    | 0 | 60  | N | Fail        |
| 592290 | F | South Wes Lower Tha     | 0 | 60  | N | Pass        |
| 592317 | F | Somalia Re Lower Tha    | 0 | 180 | N | Pass        |
| 592322 | F | Tigrai Regi Lower Tha   | 0 | 120 | N | Pass        |
| 592406 | F | Addis Abak A Level or I | 0 | 120 | N | Withdrawn   |
| 592441 | F | Amhara Re A Level or I  | 0 | 120 | N | Pass        |
| 592471 | M | Afar Regio HE Qualific  | 0 | 60  | N | Distinction |
| 592480 | F | Afar Regio HE Qualific  | 0 | 60  | N | Pass        |
| 592496 | F | South Regi A Level or I | 0 | 60  | N | Pass        |
| 592618 | F | Amhara Re A Level or I  | 0 | 60  | N | Pass        |
| 592624 | F | Addis Abak Lower Tha    | 0 | 120 | Y | Pass        |
| 592669 | F | Sidamo Re Lower Tha     | 0 | 60  | N | Withdrawn   |
| 592683 | F | Amhara Re Lower Tha     | 0 | 60  | N | Withdrawn   |
| 592756 | F | South Wes A Level or I  | 0 | 120 | N | Withdrawn   |
| 592772 | F | South Regi Lower Tha    | 0 | 60  | N | Pass        |
| 592815 | F | South Regi No Formal    | 0 | 60  | N | Withdrawn   |
| 592854 | F | South Wes A Level or I  | 0 | 120 | N | Pass        |
| 592889 | F | Addis Abak No Formal    | 0 | 60  | N | Withdrawn   |
| 592900 | M | Tigrai Regi HE Qualific | 0 | 60  | N | Pass        |
| 592949 | F | South Regi Lower Tha    | 0 | 60  | N | Withdrawn   |
| 592972 | F | Oromia Re Lower Tha     | 0 | 120 | N | Withdrawn   |
| 593023 | F | South Regi HE Qualific  | 0 | 60  | N | Pass        |
| 593081 | F | Oromia Re A Level or I  | 0 | 120 | N | Pass        |
| 593189 | F | South Regi Lower Tha    | 0 | 90  | Y | Fail        |

|        |   |                          |   |     |   |             |
|--------|---|--------------------------|---|-----|---|-------------|
| 593266 | F | South Regi Lower Tha     | 0 | 60  | N | Withdrawn   |
| 593281 | M | Tigrai Regi A Level or I | 0 | 60  | N | Withdrawn   |
| 593299 | M | Tigrai Regi Lower Tha    | 0 | 60  | N | Fail        |
| 593385 | F | Tigrai Regi HE Qualific  | 0 | 120 | N | Pass        |
| 593421 | F | South Wes A Level or I   | 0 | 60  | N | Pass        |
| 593427 | F | South Wes Lower Tha      | 0 | 75  | N | Pass        |
| 593440 | F | South Wes Lower Tha      | 0 | 60  | N | Withdrawn   |
| 593441 | F | South Wes Lower Tha      | 0 | 60  | N | Withdrawn   |
| 593443 | F | Afar Regi Lower Tha      | 0 | 60  | N | Withdrawn   |
| 593444 | F | South Wes Lower Tha      | 0 | 60  | N | Pass        |
| 593510 | F | Sidamo Re Lower Tha      | 0 | 60  | N | Pass        |
| 593513 | M | Amhara Re A Level or I   | 0 | 60  | N | Pass        |
| 593514 | M | Oromia Re A Level or I   | 0 | 60  | N | Fail        |
| 593571 | M | Sidamo Re A Level or I   | 0 | 60  | N | Withdrawn   |
| 593593 | F | Oromia Re A Level or I   | 0 | 60  | N | Pass        |
| 593613 | F | Sidamo Re A Level or I   | 0 | 120 | N | Fail        |
| 593631 | F | Addis Abak A Level or I  | 0 | 60  | N | Pass        |
| 593685 | F | South Wes A Level or I   | 0 | 60  | N | Pass        |
| 593692 | F | South Wes Lower Tha      | 0 | 60  | N | Pass        |
| 593694 | F | South Wes Lower Tha      | 0 | 60  | N | Pass        |
| 593695 | F | South Wes Lower Tha      | 0 | 75  | N | Pass        |
| 593706 | F | South Wes Lower Tha      | 0 | 60  | N | Fail        |
| 593707 | F | South Wes A Level or I   | 0 | 60  | N | Withdrawn   |
| 593709 | F | South Wes Lower Tha      | 0 | 60  | N | Fail        |
| 593711 | F | South Wes Lower Tha      | 0 | 60  | N | Pass        |
| 593712 | F | South Wes Lower Tha      | 0 | 60  | N | Pass        |
| 593715 | F | South Wes Lower Tha      | 0 | 60  | N | Pass        |
| 593727 | F | South Wes Lower Tha      | 0 | 75  | N | Pass        |
| 593743 | F | Addis Abak A Level or I  | 0 | 60  | N | Pass        |
| 593798 | F | Tigrai Regi Lower Tha    | 0 | 60  | N | Pass        |
| 593871 | F | Somalia Re A Level or I  | 0 | 90  | Y | Pass        |
| 593875 | F | South Wes A Level or I   | 0 | 60  | N | Distinction |
| 593898 | F | Oromia Re Lower Tha      | 0 | 90  | Y | Pass        |
| 593900 | F | Sidamo Re A Level or I   | 0 | 60  | N | Pass        |
| 593930 | F | Addis Abak Lower Tha     | 0 | 60  | Y | Withdrawn   |
| 594015 | F | Addis Abak A Level or I  | 0 | 120 | N | Pass        |
| 594038 | F | Addis Abak A Level or I  | 0 | 60  | N | Fail        |
| 594043 | F | Somalia Re Lower Tha     | 0 | 120 | N | Withdrawn   |
| 594056 | F | Afar Regi A Level or I   | 0 | 60  | N | Pass        |
| 594057 | M | Somalia Re HE Qualific   | 0 | 120 | N | Withdrawn   |
| 594208 | F | Afar Regi HE Qualific    | 0 | 60  | N | Withdrawn   |
| 594253 | F | South Regi A Level or I  | 0 | 60  | N | Withdrawn   |
| 594456 | F | Amhara Re Lower Tha      | 0 | 60  | N | Pass        |
| 594468 | F | Addis Abak A Level or I  | 0 | 60  | Y | Pass        |
| 594497 | F | Tigrai Regi Lower Tha    | 0 | 60  | N | Fail        |
| 594529 | F | Sidamo Re Lower Tha      | 0 | 120 | Y | Distinction |
| 594607 | M | Addis Abak No Formal     | 0 | 60  | N | Fail        |

|        |   |                          |   |     |   |             |
|--------|---|--------------------------|---|-----|---|-------------|
| 594677 | F | South Wes A Level or I   | 0 | 60  | N | Pass        |
| 594693 | F | South Wes Lower Tha      | 0 | 120 | N | Distinction |
| 594697 | F | South Regi A Level or I  | 0 | 60  | N | Fail        |
| 594762 | F | Sidamo Re A Level or I   | 0 | 120 | N | Pass        |
| 594774 | F | South Regi A Level or I  | 0 | 120 | N | Withdrawn   |
| 594776 | M | South Regi A Level or I  | 0 | 60  | N | Pass        |
| 594812 | M | Addis Abak Lower Tha     | 0 | 180 | N | Withdrawn   |
| 594845 | M | Sidamo Re Lower Tha      | 0 | 60  | N | Fail        |
| 594928 | F | South Wes A Level or I   | 0 | 120 | N | Pass        |
| 595010 | F | Sidamo Re Lower Tha      | 0 | 120 | N | Fail        |
| 595047 | F | Somalia Re Lower Tha     | 0 | 180 | N | Withdrawn   |
| 595094 | F | Tigrai Regi Lower Tha    | 0 | 60  | N | Fail        |
| 595095 | F | South Regi Lower Tha     | 0 | 60  | N | Withdrawn   |
| 595103 | F | Afar Regio Lower Tha     | 0 | 60  | N | Pass        |
| 595138 | F | Sidamo Re HE Qualific    | 0 | 60  | N | Pass        |
| 595232 | F | South Regi A Level or I  | 0 | 180 | N | Withdrawn   |
| 595234 | F | South Wes A Level or I   | 0 | 120 | N | Withdrawn   |
| 595241 | M | South Wes Lower Tha      | 0 | 60  | N | Fail        |
| 595287 | F | Afar Regio HE Qualific   | 0 | 120 | N | Withdrawn   |
| 595295 | F | Oromia Re A Level or I   | 0 | 60  | N | Pass        |
| 595298 | F | South Regi A Level or I  | 0 | 60  | N | Fail        |
| 595345 | F | Afar Regio HE Qualific   | 0 | 60  | N | Pass        |
| 595388 | F | Sidamo Re HE Qualific    | 0 | 60  | N | Withdrawn   |
| 595420 | F | Tigrai Regi Lower Tha    | 0 | 120 | N | Withdrawn   |
| 595436 | F | Tigrai Regi HE Qualific  | 0 | 90  | N | Pass        |
| 595499 | F | South Regi A Level or I  | 0 | 60  | Y | Fail        |
| 595509 | M | South Regi A Level or I  | 0 | 120 | N | Fail        |
| 595570 | F | Oromia Re A Level or I   | 0 | 60  | N | Fail        |
| 595594 | F | South Regi Lower Tha     | 0 | 60  | N | Withdrawn   |
| 595672 | F | South Regi Lower Tha     | 0 | 120 | Y | Fail        |
| 595678 | F | Tigrai Regi A Level or I | 0 | 60  | N | Pass        |
| 595711 | F | Addis Abak A Level or I  | 0 | 60  | N | Fail        |
| 595791 | M | Addis Abak A Level or I  | 0 | 120 | N | Withdrawn   |
| 595816 | F | Tigrai Regi Lower Tha    | 0 | 120 | N | Fail        |
| 595818 | F | South Regi Lower Tha     | 0 | 120 | N | Pass        |
| 595854 | F | Afar Regio Lower Tha     | 0 | 60  | Y | Pass        |
| 595874 | F | South Regi A Level or I  | 0 | 60  | N | Pass        |
| 595877 | F | Oromia Re A Level or I   | 0 | 120 | N | Fail        |
| 595925 | F | South Wes A Level or I   | 0 | 60  | N | Pass        |
| 595959 | M | Tigrai Regi Lower Tha    | 0 | 60  | N | Fail        |
| 596016 | M | Sidamo Re Lower Tha      | 0 | 60  | N | Fail        |
| 596017 | F | Tigrai Regi A Level or I | 0 | 120 | N | Pass        |
| 596041 | F | South Regi A Level or I  | 0 | 120 | N | Withdrawn   |
| 596095 | F | Tigrai Regi A Level or I | 0 | 60  | N | Withdrawn   |
| 596100 | F | South Regi Lower Tha     | 0 | 60  | N | Withdrawn   |
| 596103 | M | Tigrai Regi A Level or I | 0 | 60  | N | Withdrawn   |
| 596107 | F | Tigrai Regi Lower Tha    | 0 | 60  | N | Pass        |

|        |   |                           |   |     |   |             |
|--------|---|---------------------------|---|-----|---|-------------|
| 596108 | M | Tigray Region Lower Than  | 0 | 60  | N | Pass        |
| 596112 | F | Tigray Region A Level or  | 0 | 60  | N | Withdrawn   |
| 596114 | F | Tigray Region HE Qualific | 0 | 60  | N | Pass        |
| 596144 | F | Addis Ababa A Level or    | 0 | 90  | N | Pass        |
| 596241 | M | Tigray Region A Level or  | 0 | 60  | N | Withdrawn   |
| 596242 | F | Tigray Region A Level or  | 0 | 60  | N | Pass        |
| 596275 | F | Tigray Region A Level or  | 0 | 60  | N | Withdrawn   |
| 596305 | F | Addis Ababa Lower Than    | 0 | 60  | N | Distinction |
| 596360 | M | Sidamo Region HE Qualific | 0 | 60  | N | Fail        |
| 596372 | F | Tigray Region HE Qualific | 0 | 60  | N | Pass        |
| 596390 | F | Sidamo Region A Level or  | 0 | 60  | N | Pass        |
| 596417 | F | South Region A Level or   | 0 | 60  | N | Pass        |
| 596451 | F | Addis Ababa A Level or    | 0 | 60  | Y | Pass        |
| 596535 | F | South Region HE Qualific  | 0 | 60  | N | Pass        |
| 596583 | F | Afar Region A Level or    | 0 | 60  | N | Fail        |
| 596596 | F | Afar Region HE Qualific   | 0 | 60  | N | Fail        |
| 596641 | F | Sidamo Region Lower Than  | 0 | 60  | N | Withdrawn   |
| 596677 | F | South Region A Level or   | 0 | 60  | N | Fail        |
| 596814 | F | Sidamo Region A Level or  | 0 | 60  | N | Fail        |
| 596820 | M | Sidamo Region A Level or  | 0 | 60  | N | Fail        |
| 596847 | F | Addis Ababa A Level or    | 0 | 120 | N | Distinction |
| 596849 | F | Afar Region HE Qualific   | 0 | 60  | N | Fail        |
| 596892 | F | Addis Ababa Lower Than    | 0 | 120 | N | Fail        |
| 596897 | F | Tigray Region HE Qualific | 0 | 60  | N | Pass        |
| 596961 | F | Somalia Region Lower Than | 0 | 60  | N | Fail        |
| 596964 | F | Amhara Region A Level or  | 0 | 60  | Y | Pass        |
| 596988 | F | South Region Lower Than   | 0 | 120 | Y | Withdrawn   |
| 597033 | M | Somalia Region Lower Than | 0 | 120 | N | Fail        |
| 597050 | M | Somalia Region Lower Than | 0 | 60  | N | Distinction |
| 597078 | M | Amhara Region A Level or  | 0 | 60  | N | Fail        |
| 597102 | F | South Region A Level or   | 0 | 60  | N | Distinction |
| 597109 | F | North Region A Level or   | 0 | 120 | N | Withdrawn   |
| 597142 | F | North Region A Level or   | 0 | 60  | N | Fail        |
| 597255 | F | Somalia Region A Level or | 0 | 60  | Y | Withdrawn   |
| 597286 | F | Tigray Region A Level or  | 0 | 60  | N | Distinction |
| 597301 | F | South West Lower Than     | 0 | 120 | N | Pass        |
| 597321 | F | Amhara Region Lower Than  | 0 | 120 | N | Withdrawn   |
| 597451 | F | Oromia Region A Level or  | 0 | 120 | Y | Withdrawn   |
| 597532 | F | South West Lower Than     | 0 | 120 | N | Withdrawn   |
| 597582 | F | South West Lower Than     | 0 | 60  | N | Fail        |
| 597689 | F | South Region Lower Than   | 0 | 60  | Y | Fail        |
| 597742 | F | South Region Lower Than   | 0 | 60  | N | Pass        |
| 597790 | F | Sidamo Region HE Qualific | 0 | 120 | N | Pass        |
| 597866 | F | North Region Lower Than   | 0 | 120 | N | Fail        |
| 597878 | F | Afar Region A Level or    | 0 | 60  | N | Pass        |
| 597886 | F | South Region Lower Than   | 0 | 120 | N | Distinction |
| 597894 | F | Sidamo Region A Level or  | 0 | 120 | N | Pass        |



|        |   |                          |   |     |   |             |
|--------|---|--------------------------|---|-----|---|-------------|
| 598000 | F | Amhara Re A Level or I   | 0 | 60  | N | Pass        |
| 598199 | F | Addis Abak A Level or I  | 0 | 120 | N | Withdrawn   |
| 598202 | F | Tigrai Regi Lower Tha    | 0 | 60  | Y | Fail        |
| 598230 | F | South Wes A Level or I   | 0 | 60  | N | Pass        |
| 598243 | F | Somalia Re A Level or I  | 0 | 60  | N | Pass        |
| 598252 | F | South Wes Lower Tha      | 0 | 120 | N | Pass        |
| 598253 | F | Tigrai Regi A Level or I | 0 | 60  | N | Pass        |
| 598260 | F | South Wes A Level or I   | 0 | 120 | N | Withdrawn   |
| 598315 | F | South Regi Lower Tha     | 0 | 60  | Y | Fail        |
| 598351 | F | Addis Abak Lower Tha     | 0 | 120 | N | Pass        |
| 598394 | F | South Regi Lower Tha     | 0 | 60  | N | Withdrawn   |
| 598462 | F | South Wes A Level or I   | 0 | 120 | N | Pass        |
| 598503 | F | Afar Regio Lower Tha     | 0 | 60  | N | Withdrawn   |
| 598538 | F | Sidamo Re Lower Tha      | 0 | 60  | N | Fail        |
| 598562 | M | Addis Abak Lower Tha     | 0 | 60  | N | Fail        |
| 598596 | F | Amhara Re Lower Tha      | 0 | 90  | N | Withdrawn   |
| 598623 | F | Oromia Re Lower Tha      | 0 | 60  | N | Pass        |
| 598709 | F | Sidamo Re A Level or I   | 0 | 60  | N | Pass        |
| 598760 | F | Tigrai Regi A Level or I | 0 | 90  | N | Pass        |
| 598865 | F | South Regi Lower Tha     | 0 | 60  | N | Pass        |
| 598883 | F | Addis Abak A Level or I  | 0 | 120 | N | Distinction |
| 598901 | F | Oromia Re A Level or I   | 0 | 120 | Y | Withdrawn   |
| 598907 | F | Somalia Re A Level or I  | 0 | 60  | N | Pass        |
| 598914 | F | South Wes A Level or I   | 0 | 120 | N | Pass        |
| 598969 | F | North Regi HE Qualific   | 0 | 120 | N | Pass        |
| 598986 | F | Sidamo Re Lower Tha      | 0 | 60  | N | Fail        |
| 599016 | F | Sidamo Re A Level or I   | 0 | 60  | Y | Pass        |
| 599037 | F | Oromia Re Lower Tha      | 0 | 60  | Y | Pass        |
| 599161 | F | Afar Regio Lower Tha     | 0 | 120 | N | Withdrawn   |
| 599230 | F | South Wes HE Qualific    | 0 | 60  | N | Distinction |
| 599292 | F | Somalia Re A Level or I  | 0 | 60  | N | Pass        |
| 599402 | F | North Regi A Level or I  | 0 | 60  | N | Pass        |
| 599423 | F | Sidamo Re Lower Tha      | 0 | 120 | Y | Withdrawn   |
| 599427 | F | Sidamo Re Lower Tha      | 0 | 60  | N | Fail        |
| 599432 | F | Addis Abak A Level or I  | 0 | 120 | N | Withdrawn   |
| 599434 | M | Somalia Re A Level or I  | 0 | 60  | N | Fail        |
| 599456 | M | Amhara Re Lower Tha      | 0 | 60  | N | Withdrawn   |
| 599475 | F | Tigrai Regi HE Qualific  | 0 | 60  | N | Withdrawn   |
| 599606 | F | Addis Abak A Level or I  | 0 | 60  | N | Withdrawn   |
| 599639 | F | South Regi A Level or I  | 0 | 120 | N | Withdrawn   |
| 599640 | F | South Regi Lower Tha     | 0 | 120 | N | Fail        |
| 599644 | F | Tigrai Regi Lower Tha    | 0 | 120 | Y | Fail        |
| 599709 | F | Tigrai Regi A Level or I | 0 | 120 | N | Fail        |
| 599739 | F | Sidamo Re Lower Tha      | 0 | 60  | N | Pass        |
| 599748 | F | Oromia Re A Level or I   | 0 | 60  | N | Pass        |
| 599785 | F | Afar Regio HE Qualific   | 0 | 60  | N | Pass        |
| 599787 | M | Afar Regio A Level or I  | 0 | 60  | N | Pass        |

|        |   |             |              |   |     |   |             |
|--------|---|-------------|--------------|---|-----|---|-------------|
| 599794 | F | Afar Region | A Level or I | 0 | 60  | N | Pass        |
| 599802 | F | Afar Region | Lower Than   | 0 | 60  | N | Fail        |
| 599836 | F | Sidamo Re   | A Level or I | 0 | 60  | N | Pass        |
| 599840 | F | Sidamo Re   | A Level or I | 0 | 60  | N | Fail        |
| 599895 | F | Somalia Re  | HE Qualific  | 0 | 60  | N | Pass        |
| 599908 | F | Addis Abat  | Lower Than   | 0 | 120 | N | Pass        |
| 599960 | F | Tigray Regi | Lower Than   | 0 | 60  | N | Withdrawn   |
| 600006 | F | Addis Abat  | Lower Than   | 0 | 60  | N | Withdrawn   |
| 600121 | F | Sidamo Re   | A Level or I | 0 | 120 | Y | Pass        |
| 600211 | F | Sidamo Re   | Lower Than   | 0 | 120 | N | Fail        |
| 600218 | F | Sidamo Re   | HE Qualific  | 0 | 60  | N | Withdrawn   |
| 600254 | F | South Regi  | Lower Than   | 0 | 120 | N | Withdrawn   |
| 600263 | F | South Wes   | A Level or I | 0 | 60  | N | Fail        |
| 600279 | F | Addis Abat  | Lower Than   | 0 | 120 | N | Pass        |
| 600370 | F | South Wes   | HE Qualific  | 0 | 120 | N | Pass        |
| 600407 | F | Amhara Re   | Lower Than   | 0 | 180 | N | Withdrawn   |
| 600428 | F | Oromia Re   | A Level or I | 0 | 120 | N | Withdrawn   |
| 600449 | F | Oromia Re   | A Level or I | 0 | 60  | N | Withdrawn   |
| 600470 | F | Tigray Regi | HE Qualific  | 0 | 120 | N | Fail        |
| 600476 | F | Tigray Regi | Lower Than   | 0 | 120 | Y | Fail        |
| 600490 | F | Oromia Re   | A Level or I | 0 | 60  | N | Distinction |
| 600541 | F | Afar Region | Lower Than   | 0 | 60  | Y | Withdrawn   |
| 600579 | F | Oromia Re   | Lower Than   | 0 | 60  | N | Withdrawn   |
| 600681 | F | Addis Abat  | A Level or I | 0 | 60  | N | Withdrawn   |
| 600684 | F | South Wes   | A Level or I | 0 | 60  | N | Distinction |
| 600740 | F | South Wes   | A Level or I | 0 | 60  | N | Pass        |
| 600749 | M | Sidamo Re   | Lower Than   | 0 | 120 | N | Fail        |
| 600770 | F | Somalia Re  | Lower Than   | 0 | 60  | N | Fail        |
| 600771 | M | Oromia Re   | Lower Than   | 0 | 60  | N | Pass        |
| 600833 | F | Tigray Regi | Lower Than   | 0 | 120 | N | Fail        |
| 600844 | F | Amhara Re   | A Level or I | 0 | 60  | N | Withdrawn   |
| 600845 | M | Tigray Regi | Lower Than   | 0 | 60  | N | Fail        |
| 600856 | F | Somalia Re  | A Level or I | 0 | 60  | Y | Distinction |
| 600966 | F | South Wes   | A Level or I | 0 | 60  | N | Pass        |
| 600967 | F | Sidamo Re   | A Level or I | 0 | 120 | N | Fail        |
| 600999 | F | Amhara Re   | Lower Than   | 0 | 60  | N | Fail        |
| 601243 | F | South Wes   | HE Qualific  | 0 | 120 | N | Distinction |
| 601251 | F | South Regi  | A Level or I | 0 | 60  | N | Pass        |
| 601269 | F | Tigray Regi | Lower Than   | 0 | 60  | N | Pass        |
| 601346 | F | Somalia Re  | A Level or I | 0 | 60  | Y | Distinction |
| 601424 | F | South Regi  | A Level or I | 0 | 90  | N | Withdrawn   |
| 601455 | F | Sidamo Re   | A Level or I | 0 | 60  | N | Pass        |
| 601472 | F | South Wes   | Lower Than   | 0 | 60  | N | Withdrawn   |
| 601491 | F | Sidamo Re   | HE Qualific  | 0 | 120 | N | Withdrawn   |
| 601497 | F | South Wes   | Lower Than   | 0 | 60  | N | Distinction |
| 601499 | F | South Wes   | Lower Than   | 0 | 60  | N | Pass        |
| 601504 | F | South Wes   | Lower Than   | 0 | 60  | N | Pass        |

|        |   |                         |   |     |   |             |
|--------|---|-------------------------|---|-----|---|-------------|
| 601505 | F | Afar Region HE Qualific | 0 | 120 | N | Fail        |
| 601551 | F | Sidamo Re Lower Than    | 0 | 60  | Y | Fail        |
| 601558 | F | Sidamo Re Lower Than    | 0 | 60  | N | Fail        |
| 601635 | M | Oromia Re HE Qualific   | 0 | 60  | N | Pass        |
| 601655 | M | Afar Region A Level or  | 0 | 60  | N | Pass        |
| 601706 | F | Addis Abat A Level or   | 0 | 60  | Y | Withdrawn   |
| 601885 | F | South Regi A Level or   | 0 | 60  | N | Pass        |
| 601887 | F | South Wes Lower Than    | 0 | 60  | N | Pass        |
| 601896 | F | Afar Region Lower Than  | 0 | 60  | N | Fail        |
| 601934 | F | Amhara Re Lower Than    | 0 | 180 | N | Fail        |
| 601951 | F | South Regi Lower Than   | 0 | 60  | N | Fail        |
| 602009 | F | Tigrai Regi HE Qualific | 0 | 60  | N | Pass        |
| 602011 | F | Afar Region Lower Than  | 0 | 120 | Y | Withdrawn   |
| 602014 | F | Tigrai Regi Lower Than  | 0 | 60  | N | Pass        |
| 602032 | F | Addis Abat Lower Than   | 0 | 60  | N | Fail        |
| 602066 | M | Amhara Re A Level or    | 0 | 120 | N | Pass        |
| 602147 | F | South Wes Lower Than    | 0 | 60  | N | Pass        |
| 602245 | F | Afar Region Lower Than  | 0 | 60  | N | Pass        |
| 602324 | F | Afar Region HE Qualific | 0 | 60  | N | Fail        |
| 602395 | F | Addis Abat Lower Than   | 0 | 90  | N | Pass        |
| 602458 | F | Afar Region HE Qualific | 0 | 60  | N | Pass        |
| 602483 | F | Addis Abat Lower Than   | 0 | 60  | N | Fail        |
| 602496 | F | Sidamo Re HE Qualific   | 0 | 60  | N | Pass        |
| 602598 | F | Addis Abat Lower Than   | 0 | 120 | N | Fail        |
| 602631 | F | South Wes A Level or    | 0 | 60  | N | Withdrawn   |
| 602634 | F | Sidamo Re A Level or    | 0 | 120 | N | Withdrawn   |
| 602652 | F | Addis Abat Lower Than   | 0 | 60  | N | Withdrawn   |
| 602666 | F | Oromia Re A Level or    | 0 | 120 | Y | Withdrawn   |
| 602739 | F | Amhara Re Lower Than    | 0 | 60  | N | Withdrawn   |
| 602767 | F | Amhara Re Lower Than    | 0 | 60  | N | Fail        |
| 602803 | F | South Regi HE Qualific  | 0 | 60  | N | Withdrawn   |
| 602826 | F | Addis Abat A Level or   | 0 | 240 | N | Fail        |
| 602863 | F | Amhara Re Lower Than    | 0 | 60  | N | Withdrawn   |
| 602971 | F | Somalia Re A Level or   | 0 | 60  | N | Withdrawn   |
| 603012 | F | Addis Abat Lower Than   | 0 | 60  | N | Pass        |
| 603035 | F | Sidamo Re Lower Than    | 0 | 60  | N | Pass        |
| 603036 | F | Tigrai Regi HE Qualific | 0 | 120 | N | Pass        |
| 603038 | F | Tigrai Regi HE Qualific | 0 | 120 | N | Pass        |
| 603052 | F | Somalia Re Lower Than   | 0 | 120 | N | Withdrawn   |
| 603113 | F | Oromia Re A Level or    | 0 | 120 | Y | Withdrawn   |
| 603123 | F | Oromia Re A Level or    | 0 | 60  | N | Pass        |
| 603165 | F | Tigrai Regi HE Qualific | 0 | 60  | N | Distinction |
| 603210 | F | Afar Region A Level or  | 0 | 120 | N | Pass        |
| 603265 | F | Afar Region A Level or  | 0 | 60  | N | Fail        |
| 603270 | F | South Wes A Level or    | 0 | 60  | N | Fail        |
| 603287 | F | Somalia Re A Level or   | 0 | 60  | N | Pass        |
| 603296 | F | Amhara Re A Level or    | 0 | 60  | N | Withdrawn   |

|        |   |                           |   |     |   |             |
|--------|---|---------------------------|---|-----|---|-------------|
| 603398 | F | Afar Region Lower Than    | 0 | 60  | N | Pass        |
| 603440 | F | South Region A Level or   | 0 | 120 | N | Pass        |
| 603446 | F | Addis Ababa A Level or    | 0 | 120 | N | Pass        |
| 603471 | F | South Region A Level or   | 0 | 60  | N | Withdrawn   |
| 603516 | F | North Region Lower Than   | 0 | 120 | N | Withdrawn   |
| 603601 | F | South West Lower Than     | 0 | 60  | N | Pass        |
| 603627 | F | Addis Ababa A Level or    | 0 | 120 | N | Distinction |
| 603661 | F | South Region HE Qualific  | 0 | 60  | N | Pass        |
| 603789 | F | Amhara Region Lower Than  | 0 | 60  | N | Withdrawn   |
| 603818 | F | South Region Lower Than   | 0 | 120 | N | Withdrawn   |
| 603908 | F | South West Lower Than     | 0 | 60  | N | Pass        |
| 603910 | F | South West Lower Than     | 0 | 60  | N | Withdrawn   |
| 603912 | F | Sidamo Region Lower Than  | 0 | 60  | N | Distinction |
| 604079 | F | Amhara Region A Level or  | 0 | 120 | Y | Withdrawn   |
| 604095 | F | South Region Lower Than   | 0 | 120 | N | Fail        |
| 604116 | F | Addis Ababa A Level or    | 0 | 60  | N | Distinction |
| 604118 | F | South Region HE Qualific  | 0 | 120 | N | Fail        |
| 604147 | F | Afar Region A Level or    | 0 | 60  | N | Fail        |
| 604151 | F | Oromia Region HE Qualific | 0 | 120 | N | Distinction |
| 604154 | F | South West Lower Than     | 0 | 60  | N | Pass        |
| 604161 | M | Tigray Region Lower Than  | 0 | 120 | N | Withdrawn   |
| 604187 | F | South Region A Level or   | 0 | 60  | N | Pass        |
| 604196 | F | South West A Level or     | 0 | 60  | Y | Pass        |
| 604200 | F | South West Lower Than     | 0 | 60  | N | Pass        |
| 604204 | F | South West Lower Than     | 0 | 60  | N | Pass        |
| 604238 | F | South Region Lower Than   | 0 | 60  | N | Pass        |
| 604292 | F | Amhara Region A Level or  | 0 | 60  | N | Pass        |
| 604298 | F | South West Lower Than     | 0 | 60  | N | Withdrawn   |
| 604315 | F | South Region A Level or   | 0 | 120 | N | Distinction |
| 604356 | F | Addis Ababa Lower Than    | 0 | 60  | N | Pass        |
| 604523 | F | Somalia Region A Level or | 0 | 60  | N | Withdrawn   |
| 604543 | F | Sidamo Region A Level or  | 0 | 60  | Y | Pass        |
| 604556 | F | North Region A Level or   | 0 | 120 | N | Pass        |
| 604610 | F | Sidamo Region Lower Than  | 0 | 60  | Y | Withdrawn   |
| 604731 | F | Sidamo Region Lower Than  | 0 | 60  | N | Fail        |
| 604752 | F | North Region Lower Than   | 0 | 60  | N | Fail        |
| 604916 | F | South West A Level or     | 0 | 60  | N | Pass        |
| 604917 | F | Afar Region HE Qualific   | 0 | 60  | N | Pass        |
| 604919 | F | South Region A Level or   | 0 | 60  | N | Pass        |
| 604921 | F | South West Lower Than     | 0 | 60  | N | Fail        |
| 604923 | F | South West Lower Than     | 0 | 60  | N | Fail        |
| 604932 | F | South West A Level or     | 0 | 60  | N | Pass        |
| 604939 | F | Amhara Region Lower Than  | 0 | 60  | Y | Fail        |
| 604942 | F | South West Lower Than     | 0 | 60  | N | Pass        |
| 604951 | F | South Region Lower Than   | 0 | 60  | N | Fail        |
| 604962 | F | South West A Level or     | 0 | 120 | N | Withdrawn   |
| 604966 | F | South West Lower Than     | 0 | 60  | N | Pass        |

|        |   |                          |   |     |   |             |
|--------|---|--------------------------|---|-----|---|-------------|
| 604982 | F | South Wes Lower Thar     | 0 | 60  | N | Pass        |
| 605009 | F | South Regi A Level or I  | 0 | 60  | N | Pass        |
| 605102 | F | South Regi Lower Thar    | 0 | 60  | N | Pass        |
| 605207 | F | Oromia Re Lower Thar     | 0 | 120 | Y | Pass        |
| 605246 | F | Somalia Re HE Qualific   | 0 | 60  | N | Pass        |
| 605255 | F | Sidamo Re, A Level or I  | 0 | 120 | N | Fail        |
| 605292 | F | Amhara Re Lower Thar     | 0 | 120 | N | Withdrawn   |
| 605309 | F | South Regi A Level or I  | 0 | 60  | N | Fail        |
| 605327 | F | South Wes Lower Thar     | 0 | 60  | N | Fail        |
| 605390 | F | South Wes Lower Thar     | 0 | 60  | N | Pass        |
| 605438 | F | Afar Regioi Post Gradu   | 0 | 60  | N | Distinction |
| 605494 | F | North Regi Lower Thar    | 0 | 120 | N | Fail        |
| 605505 | F | Sidamo Re, A Level or I  | 0 | 60  | N | Withdrawn   |
| 605594 | F | Sidamo Re, Lower Thar    | 0 | 120 | N | Fail        |
| 605595 | F | Addis Abak Lower Thar    | 0 | 60  | Y | Fail        |
| 605679 | F | Addis Abak A Level or I  | 0 | 60  | N | Pass        |
| 605691 | F | Somalia Re Lower Thar    | 0 | 60  | Y | Withdrawn   |
| 605832 | F | Somalia Re A Level or I  | 0 | 60  | Y | Pass        |
| 605854 | M | Addis Abak A Level or I  | 0 | 60  | N | Fail        |
| 605882 | F | South Wes A Level or I   | 0 | 60  | N | Withdrawn   |
| 605914 | F | North Regi Lower Thar    | 0 | 120 | N | Withdrawn   |
| 605916 | F | South Regi A Level or I  | 0 | 60  | N | Pass        |
| 605930 | F | South Wes Lower Thar     | 0 | 60  | N | Pass        |
| 606063 | F | Sidamo Re, HE Qualific   | 0 | 60  | N | Withdrawn   |
| 606097 | F | Tigrai Regi A Level or I | 0 | 120 | N | Pass        |
| 606179 | F | South Wes A Level or I   | 0 | 60  | N | Distinction |
| 606194 | F | Oromia Re A Level or I   | 0 | 120 | N | Pass        |
| 606229 | F | South Regi A Level or I  | 0 | 120 | N | Pass        |
| 606333 | F | Addis Abak No Formal     | 0 | 60  | N | Withdrawn   |
| 606355 | F | Sidamo Re, A Level or I  | 0 | 120 | N | Withdrawn   |
| 606377 | F | South Regi A Level or I  | 0 | 120 | N | Pass        |
| 606388 | F | Afar Regioi HE Qualific  | 0 | 150 | N | Withdrawn   |
| 606410 | M | South Wes Lower Thar     | 0 | 60  | N | Pass        |
| 606412 | F | South Wes Lower Thar     | 0 | 60  | N | Pass        |
| 606414 | F | South Wes A Level or I   | 0 | 60  | N | Pass        |
| 606420 | F | South Wes Lower Thar     | 0 | 60  | N | Pass        |
| 606422 | F | South Wes Lower Thar     | 0 | 60  | N | Pass        |
| 606426 | F | South Wes A Level or I   | 0 | 60  | N | Withdrawn   |
| 606450 | F | South Wes Lower Thar     | 0 | 60  | N | Distinction |
| 606458 | F | South Wes Lower Thar     | 0 | 60  | N | Pass        |
| 606465 | M | Oromia Re A Level or I   | 0 | 60  | N | Pass        |
| 606477 | F | Sidamo Re, Lower Thar    | 0 | 60  | N | Withdrawn   |
| 606546 | F | Addis Abak Lower Thar    | 0 | 60  | N | Pass        |
| 606562 | F | South Regi HE Qualific   | 0 | 120 | N | Distinction |
| 606572 | F | South Regi A Level or I  | 0 | 120 | N | Pass        |
| 606607 | F | South Wes Lower Thar     | 0 | 60  | N | Withdrawn   |
| 606627 | F | Afar Regioi HE Qualific  | 0 | 60  | N | Withdrawn   |

|        |   |                          |   |     |   |             |
|--------|---|--------------------------|---|-----|---|-------------|
| 606651 | F | South Wes Lower Thar     | 0 | 120 | N | Fail        |
| 606685 | M | Tigrai Regi A Level or I | 0 | 60  | N | Pass        |
| 606697 | F | Afar Regi Lower Thar     | 0 | 60  | N | Pass        |
| 606736 | F | Addis Abak Lower Thar    | 0 | 60  | N | Withdrawn   |
| 606762 | F | Oromia Re A Level or I   | 0 | 60  | N | Fail        |
| 606797 | F | Amhara Re Lower Thar     | 0 | 60  | N | Withdrawn   |
| 606827 | F | Amhara Re A Level or I   | 0 | 120 | N | Withdrawn   |
| 606972 | F | Afar Regi Lower Thar     | 0 | 60  | N | Withdrawn   |
| 607062 | F | Afar Regi Lower Thar     | 0 | 60  | N | Withdrawn   |
| 607080 | F | Afar Regi HE Qualific    | 0 | 150 | N | Withdrawn   |
| 607097 | F | North Regi A Level or I  | 0 | 120 | N | Pass        |
| 607286 | F | South Regi A Level or I  | 0 | 180 | N | Withdrawn   |
| 607300 | F | Sidamo Re Lower Thar     | 0 | 120 | N | Fail        |
| 607309 | F | Oromia Re A Level or I   | 0 | 120 | N | Withdrawn   |
| 607382 | F | Sidamo Re A Level or I   | 0 | 120 | N | Fail        |
| 607398 | F | Oromia Re A Level or I   | 0 | 60  | N | Fail        |
| 607493 | M | South Wes Lower Thar     | 0 | 60  | N | Pass        |
| 607517 | F | Somalia Re No Formal     | 0 | 60  | N | Withdrawn   |
| 607607 | F | Amhara Re A Level or I   | 0 | 120 | N | Withdrawn   |
| 607642 | F | Addis Abak HE Qualific   | 0 | 60  | N | Pass        |
| 607699 | F | Sidamo Re A Level or I   | 0 | 60  | N | Fail        |
| 607725 | F | Oromia Re A Level or I   | 0 | 60  | N | Pass        |
| 607735 | F | Afar Regi Lower Thar     | 0 | 60  | N | Pass        |
| 607778 | F | Somalia Re A Level or I  | 0 | 60  | N | Pass        |
| 607804 | M | Afar Regi A Level or I   | 0 | 60  | N | Pass        |
| 607808 | F | Addis Abak Lower Thar    | 0 | 120 | N | Fail        |
| 607848 | F | Amhara Re Lower Thar     | 0 | 180 | N | Withdrawn   |
| 607861 | F | South Wes A Level or I   | 0 | 60  | Y | Withdrawn   |
| 607887 | F | South Regi Lower Thar    | 0 | 60  | N | Pass        |
| 607888 | F | Addis Abak No Formal     | 0 | 90  | N | Withdrawn   |
| 607889 | F | Tigrai Regi A Level or I | 0 | 60  | N | Pass        |
| 607892 | F | North Regi A Level or I  | 0 | 60  | N | Distinction |
| 607909 | F | Afar Regi A Level or I   | 0 | 120 | N | Distinction |
| 607914 | F | Amhara Re A Level or I   | 0 | 60  | N | Pass        |
| 607937 | F | South Wes A Level or I   | 0 | 60  | N | Pass        |
| 608000 | M | Sidamo Re Lower Thar     | 0 | 60  | Y | Pass        |
| 608026 | F | South Regi Lower Thar    | 0 | 120 | N | Withdrawn   |
| 608038 | F | South Wes Lower Thar     | 0 | 60  | N | Withdrawn   |
| 608041 | F | Addis Abak A Level or I  | 0 | 60  | N | Pass        |
| 608047 | M | Afar Regi Lower Thar     | 0 | 60  | N | Pass        |
| 608060 | F | Sidamo Re A Level or I   | 0 | 120 | N | Withdrawn   |
| 608197 | M | Afar Regi A Level or I   | 0 | 120 | N | Fail        |
| 608264 | F | South Wes A Level or I   | 0 | 120 | N | Pass        |
| 608419 | F | Tigrai Regi A Level or I | 0 | 60  | N | Pass        |
| 608497 | F | Oromia Re Lower Thar     | 0 | 60  | N | Withdrawn   |
| 608564 | F | Sidamo Re A Level or I   | 0 | 60  | N | Fail        |
| 608578 | F | South Wes Lower Thar     | 0 | 60  | N | Pass        |

|        |   |                          |   |     |   |             |
|--------|---|--------------------------|---|-----|---|-------------|
| 608623 | M | Somalia Re A Level or I  | 0 | 60  | Y | Pass        |
| 608647 | F | South Regi A Level or I  | 0 | 60  | N | Pass        |
| 608719 | F | Oromia Re Lower Than     | 0 | 120 | N | Withdrawn   |
| 608738 | F | South Regi Lower Than    | 0 | 120 | Y | Fail        |
| 608766 | F | South Wes A Level or I   | 0 | 120 | N | Pass        |
| 608939 | F | Sidamo Re Lower Than     | 0 | 120 | N | Fail        |
| 608942 | F | Sidamo Re A Level or I   | 0 | 120 | N | Withdrawn   |
| 609010 | F | Tigrai Regi A Level or I | 0 | 60  | N | Pass        |
| 609046 | M | South Regi Lower Than    | 0 | 60  | N | Pass        |
| 609047 | F | Sidamo Re A Level or I   | 0 | 60  | N | Fail        |
| 609107 | F | Sidamo Re Lower Than     | 0 | 120 | N | Withdrawn   |
| 609190 | F | Sidamo Re Lower Than     | 0 | 150 | N | Withdrawn   |
| 609193 | F | South Regi Lower Than    | 0 | 60  | N | Withdrawn   |
| 609230 | F | Somalia Re Lower Than    | 0 | 60  | N | Withdrawn   |
| 609307 | F | Oromia Re A Level or I   | 0 | 60  | N | Pass        |
| 609388 | F | South Wes Lower Than     | 0 | 60  | N | Withdrawn   |
| 609422 | F | Sidamo Re Lower Than     | 0 | 120 | N | Withdrawn   |
| 609510 | F | Oromia Re A Level or I   | 0 | 60  | N | Fail        |
| 609679 | F | South Wes Lower Than     | 0 | 60  | N | Pass        |
| 609704 | F | South Wes A Level or I   | 0 | 60  | N | Pass        |
| 609764 | M | Afar Regi Lower Than     | 0 | 60  | N | Fail        |
| 609804 | M | Afar Regi HE Qualific    | 0 | 60  | N | Fail        |
| 609811 | F | Afar Regi HE Qualific    | 0 | 60  | N | Distinction |
| 609812 | F | Afar Regi HE Qualific    | 0 | 60  | N | Pass        |
| 609815 | F | Afar Regi HE Qualific    | 0 | 60  | N | Pass        |
| 609817 | F | Afar Regi A Level or I   | 0 | 60  | N | Pass        |
| 609850 | F | Afar Regi Lower Than     | 0 | 60  | N | Fail        |
| 609860 | F | Afar Regi Lower Than     | 0 | 60  | N | Withdrawn   |
| 609864 | F | Afar Regi A Level or I   | 0 | 60  | N | Pass        |
| 609871 | M | Afar Regi A Level or I   | 0 | 60  | N | Pass        |
| 609873 | F | Afar Regi HE Qualific    | 0 | 120 | N | Withdrawn   |
| 609887 | F | Addis Abak No Formal     | 0 | 60  | N | Fail        |
| 610032 | F | Sidamo Re A Level or I   | 0 | 60  | N | Distinction |
| 610059 | F | South Wes A Level or I   | 1 | 60  | N | Pass        |
| 610118 | M | South Wes A Level or I   | 0 | 60  | N | Fail        |
| 610260 | F | South Wes HE Qualific    | 0 | 60  | N | Pass        |
| 610362 | F | Sidamo Re Lower Than     | 0 | 60  | N | Pass        |
| 610392 | F | Sidamo Re Lower Than     | 0 | 60  | N | Withdrawn   |
| 610423 | M | Tigrai Regi A Level or I | 0 | 60  | N | Fail        |
| 610428 | F | Tigrai Regi A Level or I | 0 | 60  | N | Pass        |
| 610449 | F | Addis Abak A Level or I  | 0 | 120 | Y | Withdrawn   |
| 610553 | F | Addis Abak A Level or I  | 0 | 60  | N | Pass        |
| 610700 | F | South Wes Lower Than     | 0 | 120 | N | Fail        |
| 610725 | M | Tigrai Regi A Level or I | 0 | 60  | N | Pass        |
| 610731 | F | Tigrai Regi Lower Than   | 0 | 60  | N | Fail        |
| 610740 | F | Tigrai Regi Lower Than   | 0 | 60  | N | Fail        |
| 610744 | F | Tigrai Regi Lower Than   | 0 | 60  | N | Fail        |

|        |   |                          |   |     |   |             |
|--------|---|--------------------------|---|-----|---|-------------|
| 610745 | F | Addis Abat A Level or I  | 0 | 60  | N | Pass        |
| 610748 | F | Tigrai Regi No Formal    | 0 | 60  | N | Withdrawn   |
| 610750 | F | Addis Abat HE Qualific   | 0 | 60  | N | Distinction |
| 610751 | F | Tigrai Regi A Level or I | 0 | 60  | N | Fail        |
| 610763 | M | Tigrai Regi HE Qualific  | 0 | 60  | N | Pass        |
| 610770 | F | Tigrai Regi No Formal    | 0 | 60  | N | Withdrawn   |
| 610772 | M | Tigrai Regi HE Qualific  | 0 | 60  | N | Fail        |
| 610776 | F | Tigrai Regi A Level or I | 0 | 60  | N | Fail        |
| 610780 | F | Somalia Re A Level or I  | 0 | 120 | N | Fail        |
| 610783 | M | Amhara Re A Level or I   | 0 | 120 | N | Withdrawn   |
| 610802 | F | Tigrai Regi A Level or I | 0 | 120 | N | Withdrawn   |
| 610804 | F | Tigrai Regi A Level or I | 0 | 60  | N | Fail        |
| 610906 | F | South Regi A Level or I  | 0 | 60  | N | Pass        |
| 611004 | F | Tigrai Regi A Level or I | 0 | 60  | N | Fail        |
| 611012 | F | South Regi A Level or I  | 0 | 60  | N | Pass        |
| 611017 | F | South Regi A Level or I  | 0 | 60  | N | Pass        |
| 611023 | F | Tigrai Regi Lower Than   | 0 | 60  | N | Pass        |
| 611046 | F | Amhara Re Lower Than     | 0 | 120 | Y | Withdrawn   |
| 611048 | M | Tigrai Regi A Level or I | 0 | 60  | N | Fail        |
| 611051 | M | Tigrai Regi HE Qualific  | 0 | 60  | N | Fail        |
| 611060 | F | Tigrai Regi HE Qualific  | 0 | 60  | N | Pass        |
| 611096 | M | Tigrai Regi No Formal    | 0 | 60  | N | Fail        |
| 611182 | F | Amhara Re Lower Than     | 0 | 60  | N | Fail        |
| 611228 | F | South Regi A Level or I  | 0 | 60  | N | Pass        |
| 611268 | F | Amhara Re A Level or I   | 0 | 120 | N | Fail        |
| 611315 | F | Somalia Re A Level or I  | 0 | 60  | N | Distinction |
| 611345 | F | Tigrai Regi Lower Than   | 0 | 60  | N | Withdrawn   |
| 611383 | F | Somalia Re A Level or I  | 0 | 120 | N | Distinction |
| 611531 | M | Afar Regio Lower Than    | 0 | 60  | N | Pass        |
| 611688 | F | South Wes Lower Than     | 0 | 60  | N | Pass        |
| 611690 | F | South Wes A Level or I   | 0 | 60  | N | Pass        |
| 612050 | F | Afar Regio A Level or I  | 0 | 75  | N | Withdrawn   |
| 612210 | F | Afar Regio A Level or I  | 0 | 60  | N | Pass        |
| 612217 | F | Sidamo Re Lower Than     | 0 | 180 | N | Pass        |
| 612252 | M | Oromia Re A Level or I   | 0 | 60  | N | Pass        |
| 612255 | M | Oromia Re Lower Than     | 0 | 60  | N | Pass        |
| 612355 | F | Oromia Re A Level or I   | 0 | 60  | N | Pass        |
| 612361 | F | Oromia Re A Level or I   | 0 | 60  | N | Pass        |
| 612484 | F | South Wes A Level or I   | 0 | 60  | N | Pass        |
| 612488 | F | South Wes A Level or I   | 0 | 60  | N | Distinction |
| 612517 | F | South Wes A Level or I   | 0 | 60  | N | Pass        |
| 612656 | F | Oromia Re HE Qualific    | 0 | 120 | N | Distinction |
| 612658 | F | Oromia Re HE Qualific    | 0 | 120 | N | Distinction |
| 612661 | F | Oromia Re HE Qualific    | 0 | 120 | N | Distinction |
| 612684 | F | Sidamo Re Lower Than     | 0 | 120 | N | Pass        |
| 612757 | M | North Regi HE Qualific   | 0 | 120 | N | Pass        |
| 612891 | F | South Wes Lower Than     | 0 | 60  | N | Pass        |



|         |   |                            |   |     |   |             |
|---------|---|----------------------------|---|-----|---|-------------|
| 613051  | F | South Wes Lower Tha        | 0 | 60  | N | Fail        |
| 613158  | F | South Wes Lower Tha        | 0 | 60  | N | Pass        |
| 613159  | F | South Wes A Level or I     | 0 | 60  | N | Withdrawn   |
| 613160  | F | South Wes A Level or I     | 0 | 60  | N | Distinction |
| 613162  | M | South Wes A Level or I     | 0 | 120 | N | Withdrawn   |
| 613164  | F | South Wes A Level or I     | 0 | 60  | N | Distinction |
| 613171  | F | Afar Region Lower Tha      | 0 | 60  | N | Pass        |
| 613173  | F | Afar Region A Level or I   | 0 | 60  | N | Pass        |
| 613175  | F | South Wes A Level or I     | 0 | 60  | N | Fail        |
| 613176  | F | South Wes A Level or I     | 0 | 60  | N | Withdrawn   |
| 613177  | F | South Wes A Level or I     | 0 | 60  | N | Pass        |
| 613191  | F | South Wes Lower Tha        | 0 | 60  | N | Withdrawn   |
| 613196  | F | South Wes Lower Tha        | 0 | 60  | N | Pass        |
| 613199  | F | South Wes A Level or I     | 0 | 120 | Y | Withdrawn   |
| 613200  | F | South Wes Lower Tha        | 0 | 60  | N | Pass        |
| 613203  | F | South Wes HE Qualific      | 0 | 60  | N | Distinction |
| 613208  | F | South Wes A Level or I     | 0 | 60  | N | Pass        |
| 613273  | M | South Wes Lower Tha        | 0 | 60  | N | Withdrawn   |
| 613293  | F | South Wes Lower Tha        | 0 | 60  | N | Pass        |
| 613298  | M | South Wes HE Qualific      | 0 | 60  | N | Withdrawn   |
| 613416  | M | Addis Abak A Level or I    | 0 | 60  | N | Pass        |
| 613418  | F | Addis Abak A Level or I    | 0 | 60  | N | Pass        |
| 613735  | F | Oromia Re HE Qualific      | 0 | 120 | N | Distinction |
| 613738  | F | Oromia Re HE Qualific      | 0 | 120 | N | Pass        |
| 614013  | F | Tigray Region A Level or I | 0 | 60  | N | Pass        |
| 614064  | F | Tigray Region A Level or I | 0 | 60  | N | Pass        |
| 614068  | F | Tigray Region Lower Tha    | 0 | 60  | N | Withdrawn   |
| 614072  | F | Tigray Region A Level or I | 0 | 60  | N | Pass        |
| 614148  | F | Amhara Re HE Qualific      | 0 | 60  | N | Fail        |
| 614495  | F | Addis Abak Post Gradu      | 0 | 180 | N | Distinction |
| 614546  | F | Sidamo Re A Level or I     | 0 | 120 | N | Distinction |
| 614556  | F | Sidamo Re A Level or I     | 0 | 120 | N | Pass        |
| 615127  | F | Somalia Re HE Qualific     | 0 | 120 | N | Distinction |
| 615148  | F | South Regi HE Qualific     | 0 | 120 | N | Withdrawn   |
| 616342  | M | Tigray Region A Level or I | 0 | 120 | N | Pass        |
| 616502  | M | Sidamo Re A Level or I     | 0 | 60  | N | Fail        |
| 616735  | F | Somalia Re A Level or I    | 0 | 120 | N | Pass        |
| 617116  | F | Tigray Region HE Qualific  | 0 | 60  | N | Pass        |
| 617472  | F | Somalia Re A Level or I    | 0 | 120 | N | Pass        |
| 619082  | F | South Wes HE Qualific      | 0 | 60  | N | Pass        |
| 619941  | F | Addis Abak HE Qualific     | 0 | 60  | N | Pass        |
| 1018682 | F | South Wes HE Qualific      | 0 | 120 | Y | Fail        |
| 1105438 | F | Somalia Re A Level or I    | 0 | 60  | N | Pass        |
| 1170618 | F | Oromia Re HE Qualific      | 0 | 120 | N | Distinction |
| 1340766 | F | South Regi A Level or I    | 0 | 60  | N | Distinction |
| 1399285 | F | Tigray Region Lower Tha    | 0 | 60  | N | Pass        |
| 1405594 | F | Amhara Re Lower Tha        | 0 | 120 | N | Pass        |

|         |   |                          |   |     |   |             |
|---------|---|--------------------------|---|-----|---|-------------|
| 1411627 | F | South Regi Lower Thai    | 1 | 180 | Y | Pass        |
| 1413989 | F | Afar Regio HE Qualific   | 3 | 75  | N | Withdrawn   |
| 1421720 | M | Amhara Re HE Qualific    | 2 | 120 | N | Pass        |
| 1440341 | M | Tigrai Regi Lower Thai   | 0 | 60  | N | Pass        |
| 1467014 | M | Tigrai Regi Lower Thai   | 0 | 60  | N | Pass        |
| 1503056 | F | South Wes Lower Thai     | 0 | 120 | Y | Pass        |
| 1521687 | F | South Regi HE Qualific   | 0 | 120 | N | Fail        |
| 1536774 | F | South Regi Lower Thai    | 1 | 60  | N | Pass        |
| 1541133 | F | Afar Regio A Level or I  | 0 | 150 | Y | Fail        |
| 1588208 | F | Amhara Re Lower Thai     | 0 | 120 | N | Withdrawn   |
| 1594621 | F | South Regi Lower Thai    | 0 | 60  | N | Pass        |
| 1624707 | F | South Regi A Level or I  | 0 | 60  | N | Distinction |
| 1627017 | F | North Regi HE Qualific   | 0 | 120 | N | Pass        |
| 1695710 | F | Addis Abak A Level or I  | 0 | 120 | N | Pass        |
| 1726951 | F | Tigrai Regi A Level or I | 0 | 60  | N | Distinction |
| 1731564 | F | South Wes Lower Thai     | 0 | 60  | N | Pass        |
| 1759851 | F | Somalia Re Lower Thai    | 0 | 120 | N | Withdrawn   |
| 1771053 | F | South Regi Lower Thai    | 1 | 60  | N | Withdrawn   |
| 1778145 | F | Oromia Re Lower Thai     | 0 | 60  | Y | Pass        |
| 1781804 | F | Sidamo Re Lower Thai     | 0 | 60  | N | Fail        |
| 1797168 | F | South Wes Lower Thai     | 0 | 60  | N | Pass        |
| 1866742 | F | South Wes Lower Thai     | 0 | 120 | N | Withdrawn   |
| 1886295 | F | South Regi A Level or I  | 1 | 60  | N | Distinction |
| 1889565 | F | Oromia Re A Level or I   | 0 | 60  | N | Distinction |
| 1903677 | F | South Regi Lower Thai    | 1 | 60  | N | Pass        |
| 1910175 | F | Afar Regio A Level or I  | 0 | 60  | N | Pass        |
| 1934047 | F | Sidamo Re Lower Thai     | 0 | 90  | N | Withdrawn   |
| 1935487 | F | South Regi Lower Thai    | 0 | 60  | N | Withdrawn   |
| 1939695 | F | Afar Regio Lower Thai    | 2 | 60  | Y | Distinction |
| 1941248 | F | Addis Abak A Level or I  | 0 | 60  | N | Distinction |
| 1946308 | F | Addis Abak Lower Thai    | 0 | 60  | N | Pass        |
| 1963287 | F | South Regi No Formal     | 0 | 60  | N | Fail        |
| 1988213 | F | Sidamo Re A Level or I   | 0 | 90  | N | Withdrawn   |
| 1990650 | F | Afar Regio Lower Thai    | 3 | 120 | N | Fail        |
| 1993672 | F | South Regi Lower Thai    | 4 | 60  | Y | Withdrawn   |
| 1998790 | M | Tigrai Regi A Level or I | 0 | 60  | N | Fail        |
| 2001687 | F | South Regi A Level or I  | 0 | 60  | Y | Pass        |
| 2002046 | F | South Wes A Level or I   | 0 | 120 | N | Pass        |
| 2006283 | F | Afar Regio Lower Thai    | 0 | 60  | N | Pass        |
| 2009558 | F | Tigrai Regi A Level or I | 0 | 60  | N | Withdrawn   |
| 2022801 | M | South Regi A Level or I  | 0 | 120 | N | Withdrawn   |
| 2023561 | M | Sidamo Re Lower Thai     | 5 | 60  | N | Withdrawn   |
| 2029037 | F | South Regi Lower Thai    | 0 | 60  | N | Pass        |
| 2034300 | F | Sidamo Re Lower Thai     | 1 | 60  | N | Pass        |
| 2044036 | F | South Wes Lower Thai     | 2 | 60  | N | Fail        |
| 2056947 | F | Amhara Re Lower Thai     | 0 | 60  | N | Fail        |
| 2061889 | F | Somalia Re Lower Thai    | 1 | 60  | N | Pass        |

|         |   |                             |   |     |   |             |
|---------|---|-----------------------------|---|-----|---|-------------|
| 2062995 | F | Afar Region HE Qualific     | 0 | 60  | N | Pass        |
| 2072166 | F | South Region Lower Thar     | 0 | 60  | Y | Withdrawn   |
| 2075158 | M | South Region A Level or I   | 0 | 60  | N | Withdrawn   |
| 2075264 | F | Afar Region HE Qualific     | 1 | 75  | N | Withdrawn   |
| 2078479 | F | Afar Region HE Qualific     | 0 | 60  | N | Distinction |
| 2078768 | F | Tigray Region Lower Thar    | 0 | 60  | N | Pass        |
| 2082318 | F | Oromia Region A Level or I  | 1 | 120 | N | Withdrawn   |
| 2083576 | M | Afar Region Lower Thar      | 0 | 60  | N | Pass        |
| 2095379 | M | South West Lower Thar       | 0 | 60  | N | Pass        |
| 2111015 | F | South West Lower Thar       | 0 | 60  | N | Pass        |
| 2111666 | F | Amhara Region Lower Thar    | 0 | 60  | N | Withdrawn   |
| 2115711 | M | Tigray Region Lower Thar    | 0 | 120 | N | Pass        |
| 2128304 | F | Oromia Region A Level or I  | 2 | 120 | N | Pass        |
| 2132966 | F | South West Lower Thar       | 0 | 60  | N | Pass        |
| 2140444 | F | Tigray Region A Level or I  | 1 | 120 | N | Fail        |
| 2147687 | F | South West Lower Thar       | 0 | 60  | N | Fail        |
| 2147929 | F | South Region A Level or I   | 0 | 120 | N | Pass        |
| 2153026 | F | Sidamo Region HE Qualific   | 0 | 60  | N | Withdrawn   |
| 2160453 | F | South Region Lower Thar     | 0 | 60  | N | Pass        |
| 2164944 | F | South Region Lower Thar     | 0 | 60  | N | Fail        |
| 2174835 | F | Sidamo Region A Level or I  | 0 | 60  | N | Pass        |
| 2187146 | F | South West A Level or I     | 0 | 120 | N | Distinction |
| 2192113 | M | Afar Region HE Qualific     | 0 | 60  | Y | Withdrawn   |
| 2196054 | F | Afar Region A Level or I    | 0 | 60  | N | Pass        |
| 2210666 | F | Sidamo Region No Formal     | 0 | 60  | N | Fail        |
| 2210681 | F | Somalia Region A Level or I | 1 | 60  | N | Withdrawn   |
| 2211448 | F | Sidamo Region Lower Thar    | 1 | 120 | N | Fail        |
| 2211630 | F | Addis Ababa A Level or I    | 0 | 60  | N | Withdrawn   |
| 2214631 | M | Afar Region HE Qualific     | 0 | 90  | N | Pass        |
| 2225190 | M | South Region Lower Thar     | 0 | 60  | N | Fail        |
| 2226301 | F | Sidamo Region Lower Thar    | 1 | 60  | N | Pass        |
| 2227004 | F | Sidamo Region A Level or I  | 1 | 120 | N | Withdrawn   |
| 2229783 | F | Sidamo Region HE Qualific   | 0 | 60  | N | Fail        |
| 2239140 | F | South Region A Level or I   | 2 | 60  | N | Fail        |
| 2242290 | F | Amhara Region HE Qualific   | 1 | 60  | N | Fail        |
| 2262671 | F | Somalia Region Lower Thar   | 0 | 60  | N | Fail        |
| 2266650 | F | Sidamo Region No Formal     | 0 | 60  | N | Fail        |
| 2271644 | M | South Region A Level or I   | 0 | 180 | N | Pass        |
| 2271743 | F | Tigray Region A Level or I  | 1 | 180 | Y | Withdrawn   |
| 2272630 | F | Sidamo Region A Level or I  | 0 | 60  | N | Withdrawn   |
| 2273256 | F | South Region Lower Thar     | 0 | 180 | Y | Withdrawn   |
| 2276893 | F | South Region A Level or I   | 5 | 60  | N | Withdrawn   |
| 2280314 | F | South Region A Level or I   | 0 | 60  | N | Pass        |
| 2282129 | F | South West Lower Thar       | 1 | 60  | N | Fail        |
| 2284583 | F | Sidamo Region A Level or I  | 0 | 180 | N | Pass        |
| 2291034 | F | Sidamo Region HE Qualific   | 0 | 120 | N | Withdrawn   |
| 2294490 | F | Afar Region HE Qualific     | 1 | 180 | N | Fail        |

|         |   |                          |   |     |   |             |
|---------|---|--------------------------|---|-----|---|-------------|
| 2296908 | F | South Regi Lower Tha     | 0 | 60  | N | Withdrawn   |
| 2299338 | F | Oromia Re A Level or I   | 0 | 120 | N | Distinction |
| 2313615 | F | Oromia Re Lower Tha      | 0 | 60  | N | Withdrawn   |
| 2318763 | F | Amhara Re A Level or I   | 0 | 120 | N | Fail        |
| 2320306 | F | Oromia Re Lower Tha      | 0 | 60  | N | Pass        |
| 2334319 | M | Afar Regio Lower Tha     | 0 | 60  | N | Pass        |
| 2338586 | F | Sidamo Re Lower Tha      | 0 | 120 | N | Distinction |
| 2346025 | F | Afar Regio Lower Tha     | 2 | 60  | N | Fail        |
| 2349825 | F | Addis Abak A Level or I  | 0 | 220 | N | Withdrawn   |
| 2356809 | F | South Wes A Level or I   | 0 | 60  | N | Distinction |
| 2363875 | F | Afar Regio HE Qualific   | 0 | 60  | N | Pass        |
| 2382253 | F | South Regi A Level or I  | 1 | 60  | N | Fail        |
| 2383103 | F | South Regi Lower Tha     | 3 | 60  | N | Withdrawn   |
| 2390117 | M | Oromia Re A Level or I   | 0 | 60  | N | Distinction |
| 2392824 | F | Oromia Re Lower Tha      | 1 | 60  | N | Pass        |
| 2396786 | F | South Wes A Level or I   | 0 | 60  | N | Fail        |
| 2400851 | F | Sidamo Re Lower Tha      | 0 | 60  | N | Pass        |
| 2411595 | F | Addis Abak Lower Tha     | 0 | 60  | Y | Pass        |
| 2415414 | F | Afar Regio HE Qualific   | 0 | 120 | N | Distinction |
| 2416774 | F | Addis Abak A Level or I  | 0 | 120 | N | Pass        |
| 2420909 | F | South Regi A Level or I  | 0 | 60  | N | Pass        |
| 2421929 | F | Sidamo Re Lower Tha      | 1 | 195 | N | Fail        |
| 2425156 | F | Addis Abak HE Qualific   | 0 | 180 | N | Pass        |
| 2444641 | F | Addis Abak Lower Tha     | 0 | 60  | Y | Fail        |
| 2451269 | F | Afar Regio Lower Tha     | 0 | 180 | N | Pass        |
| 2452289 | F | Oromia Re Lower Tha      | 0 | 60  | N | Pass        |
| 2453657 | F | South Regi Lower Tha     | 0 | 60  | N | Fail        |
| 2455066 | F | Sidamo Re HE Qualific    | 0 | 60  | N | Pass        |
| 2455578 | F | South Regi A Level or I  | 0 | 120 | N | Pass        |
| 2459051 | F | Amhara Re Lower Tha      | 1 | 60  | N | Fail        |
| 2460002 | F | South Regi HE Qualific   | 0 | 60  | N | Fail        |
| 2463213 | F | Addis Abak Lower Tha     | 0 | 90  | N | Pass        |
| 2463950 | F | Sidamo Re A Level or I   | 1 | 120 | N | Pass        |
| 2464683 | F | Somalia Re A Level or I  | 0 | 90  | Y | Pass        |
| 2465209 | F | Addis Abak Lower Tha     | 0 | 120 | N | Withdrawn   |
| 2468280 | F | Tigrai Regi A Level or I | 0 | 60  | N | Pass        |
| 2468706 | F | Afar Regio HE Qualific   | 0 | 75  | N | Distinction |
| 2473780 | F | Afar Regio HE Qualific   | 0 | 60  | N | Distinction |
| 2476144 | F | South Regi Lower Tha     | 0 | 120 | Y | Withdrawn   |
| 2481657 | F | South Regi Lower Tha     | 0 | 60  | N | Withdrawn   |
| 2487785 | F | South Wes Lower Tha      | 0 | 120 | N | Withdrawn   |
| 2488714 | M | South Regi Lower Tha     | 0 | 60  | N | Withdrawn   |
| 2496235 | M | Tigrai Regi HE Qualific  | 0 | 180 | N | Withdrawn   |
| 2509297 | F | Sidamo Re HE Qualific    | 0 | 240 | N | Withdrawn   |
| 2510414 | M | Sidamo Re Lower Tha      | 0 | 60  | N | Fail        |
| 2512392 | F | Tigrai Regi Lower Tha    | 1 | 60  | N | Pass        |
| 2513083 | F | South Regi Lower Tha     | 1 | 90  | N | Withdrawn   |

|         |   |                          |   |     |   |             |
|---------|---|--------------------------|---|-----|---|-------------|
| 2514379 | F | Addis Abat Lower Tha     | 0 | 60  | N | Fail        |
| 2518589 | M | Sidamo Re Lower Tha      | 0 | 120 | N | Withdrawn   |
| 2522312 | M | South Regi Lower Tha     | 0 | 60  | N | Withdrawn   |
| 2528352 | F | South Regi Lower Tha     | 2 | 60  | N | Fail        |
| 2529306 | F | Sidamo Re No Formal      | 1 | 60  | N | Fail        |
| 2532647 | F | Afar Regio Lower Tha     | 0 | 60  | N | Fail        |
| 2539817 | M | Amhara Re Lower Tha      | 1 | 60  | N | Withdrawn   |
| 2539858 | M | South Wes A Level or I   | 0 | 180 | N | Distinction |
| 2540724 | M | South Regi HE Qualific   | 1 | 180 | N | Distinction |
| 2544448 | F | Tigrai Regi Lower Tha    | 0 | 60  | N | Fail        |
| 2545488 | F | Amhara Re Lower Tha      | 1 | 60  | N | Withdrawn   |
| 2550290 | F | Tigrai Regi A Level or I | 0 | 120 | N | Fail        |
| 2553890 | F | Somalia Re Lower Tha     | 0 | 60  | N | Pass        |
| 2557885 | F | South Regi HE Qualific   | 0 | 60  | N | Withdrawn   |
| 2564744 | F | South Wes Lower Tha      | 0 | 60  | N | Pass        |
| 2567158 | F | South Regi A Level or I  | 0 | 180 | N | Pass        |
| 2573353 | F | Sidamo Re Lower Tha      | 0 | 60  | N | Fail        |
| 2573570 | F | Amhara Re A Level or I   | 0 | 60  | N | Withdrawn   |
| 2575994 | F | South Regi A Level or I  | 0 | 60  | N | Fail        |
| 2578802 | F | Sidamo Re Lower Tha      | 0 | 120 | N | Pass        |
| 2579673 | F | South Wes Lower Tha      | 2 | 60  | N | Fail        |
| 2579817 | F | Sidamo Re HE Qualific    | 1 | 60  | N | Withdrawn   |
| 2583791 | F | Sidamo Re Lower Tha      | 0 | 60  | N | Fail        |
| 2584834 | F | Addis Abat Lower Tha     | 1 | 60  | Y | Pass        |
| 2585937 | F | Afar Regio A Level or I  | 1 | 165 | Y | Pass        |
| 2587329 | F | Sidamo Re A Level or I   | 0 | 120 | N | Pass        |
| 2587950 | F | North Regi HE Qualific   | 4 | 240 | N | Withdrawn   |
| 2588742 | F | Somalia Re Lower Tha     | 2 | 60  | N | Pass        |
| 2591421 | F | Sidamo Re A Level or I   | 1 | 90  | N | Pass        |
| 2607641 | M | South Wes A Level or I   | 0 | 60  | N | Pass        |
| 2617839 | F | Tigrai Regi A Level or I | 0 | 60  | N | Pass        |
| 2619107 | F | Afar Regio A Level or I  | 0 | 60  | N | Distinction |
| 2620279 | F | Afar Regio Lower Tha     | 0 | 60  | N | Withdrawn   |
| 2620432 | F | Oromia Re A Level or I   | 0 | 120 | Y | Withdrawn   |
| 2625315 | F | Sidamo Re A Level or I   | 0 | 60  | N | Fail        |
| 2625752 | F | Addis Abat Lower Tha     | 0 | 180 | N | Withdrawn   |
| 2631545 | F | Addis Abat A Level or I  | 0 | 150 | Y | Fail        |
| 2632668 | F | Somalia Re Lower Tha     | 0 | 120 | N | Withdrawn   |
| 2638377 | M | South Regi A Level or I  | 0 | 60  | N | Pass        |
| 2638818 | F | South Regi A Level or I  | 0 | 120 | N | Distinction |
| 2642717 | M | Oromia Re Lower Tha      | 0 | 120 | N | Pass        |
| 2648206 | F | South Wes A Level or I   | 0 | 120 | N | Withdrawn   |
| 2650236 | F | Oromia Re Lower Tha      | 1 | 60  | N | Fail        |
| 2656860 | F | Addis Abat Lower Tha     | 3 | 120 | Y | Withdrawn   |
| 2657960 | F | Amhara Re Lower Tha      | 0 | 60  | N | Fail        |
| 2662716 | F | Addis Abat Lower Tha     | 0 | 60  | N | Fail        |
| 2664036 | F | Sidamo Re A Level or I   | 0 | 120 | N | Fail        |

|         |   |                             |   |     |   |             |
|---------|---|-----------------------------|---|-----|---|-------------|
| 2680344 | F | Afar Region HE Qualific     | 0 | 60  | N | Pass        |
| 2680885 | F | South Region Lower Thar     | 0 | 60  | Y | Distinction |
| 2690077 | M | Sidamo Region A Level or I  | 2 | 75  | N | Withdrawn   |
| 2691100 | F | Sidamo Region Lower Thar    | 0 | 120 | N | Pass        |
| 2691566 | F | North Region Lower Thar     | 0 | 60  | N | Fail        |
| 2693772 | F | Sidamo Region Lower Thar    | 0 | 60  | N | Withdrawn   |
| 25629   | F | Afar Region Lower Thar      | 1 | 120 | N | Withdrawn   |
| 25997   | F | Sidamo Region A Level or I  | 2 | 60  | N | Withdrawn   |
| 27891   | M | Afar Region Lower Thar      | 4 | 120 | Y | Fail        |
| 38941   | F | Somalia Region A Level or I | 0 | 60  | N | Fail        |
| 50069   | F | Afar Region A Level or I    | 0 | 90  | N | Fail        |
| 52426   | F | Afar Region Lower Thar      | 1 | 60  | N | Fail        |
| 55968   | F | Tigray Region Lower Thar    | 0 | 120 | N | Fail        |
| 59725   | F | Tigray Region HE Qualific   | 0 | 120 | N | Distinction |
| 60416   | F | Addis Ababa Lower Thar      | 1 | 60  | N | Pass        |
| 60830   | F | South Region HE Qualific    | 0 | 120 | N | Pass        |
| 63721   | F | Oromia Region Lower Thar    | 0 | 60  | Y | Distinction |
| 64275   | F | South Region Lower Thar     | 2 | 60  | Y | Pass        |
| 72400   | F | Addis Ababa A Level or I    | 0 | 120 | Y | Distinction |
| 75118   | F | Amhara Region Lower Thar    | 0 | 150 | Y | Withdrawn   |
| 76196   | F | Amhara Region Lower Thar    | 1 | 120 | Y | Withdrawn   |
| 78255   | F | North Region Lower Thar     | 2 | 120 | N | Fail        |
| 80001   | F | South West Lower Thar       | 0 | 60  | N | Fail        |
| 88340   | F | Tigray Region Lower Thar    | 0 | 60  | Y | Withdrawn   |
| 89092   | F | Tigray Region Lower Thar    | 2 | 60  | N | Pass        |
| 89778   | M | Oromia Region A Level or I  | 1 | 120 | N | Distinction |
| 90361   | F | Tigray Region HE Qualific   | 0 | 60  | N | Pass        |
| 92274   | F | Addis Ababa Lower Thar      | 2 | 120 | N | Withdrawn   |
| 92341   | F | Amhara Region Lower Thar    | 2 | 60  | N | Fail        |
| 93925   | F | Addis Ababa Lower Thar      | 0 | 60  | N | Withdrawn   |
| 97006   | F | Addis Ababa A Level or I    | 1 | 60  | N | Pass        |
| 97865   | F | Sidamo Region Lower Thar    | 3 | 60  | N | Withdrawn   |
| 99799   | F | Somalia Region A Level or I | 1 | 120 | N | Pass        |
| 103535  | F | South West A Level or I     | 0 | 120 | N | Pass        |
| 104238  | F | Somalia Region Lower Thar   | 0 | 120 | N | Withdrawn   |
| 107713  | F | Addis Ababa Lower Thar      | 2 | 150 | N | Withdrawn   |
| 108799  | F | Afar Region Post Gradu      | 0 | 75  | N | Distinction |
| 115452  | F | Addis Ababa Lower Thar      | 1 | 120 | N | Fail        |
| 117699  | F | South Region A Level or I   | 0 | 120 | N | Distinction |
| 119471  | F | Somalia Region Lower Thar   | 1 | 120 | N | Fail        |
| 123270  | F | Amhara Region Lower Thar    | 0 | 60  | N | Fail        |
| 123462  | M | Afar Region HE Qualific     | 1 | 120 | N | Pass        |
| 125055  | F | Somalia Region A Level or I | 0 | 60  | Y | Pass        |
| 126608  | M | Tigray Region A Level or I  | 0 | 60  | N | Pass        |
| 126713  | F | Sidamo Region A Level or I  | 0 | 120 | N | Pass        |
| 130013  | F | Addis Ababa A Level or I    | 0 | 60  | Y | Pass        |
| 132972  | F | Sidamo Region Lower Thar    | 0 | 240 | N | Pass        |

|        |   |                   |                     |   |     |   |             |
|--------|---|-------------------|---------------------|---|-----|---|-------------|
| 139250 | F | Afar Region       | A Level or Higher   | 0 | 60  | N | Distinction |
| 140719 | F | Sidamo Region     | HE Qualification    | 1 | 240 | N | Fail        |
| 148427 | F | Oromia Region     | A Level or Higher   | 0 | 120 | N | Pass        |
| 155631 | F | South Region      | Lower Than A Level  | 0 | 60  | N | Pass        |
| 157276 | F | Amhara Region     | A Level or Higher   | 0 | 60  | N | Distinction |
| 159293 | M | Oromia Region     | A Level or Higher   | 0 | 120 | N | Distinction |
| 165904 | F | South Region      | A Level or Higher   | 1 | 120 | N | Distinction |
| 170519 | F | South Region      | A Level or Higher   | 1 | 120 | N | Withdrawn   |
| 171751 | F | South West Region | A Level or Higher   | 0 | 60  | N | Pass        |
| 172137 | F | Tigray Region     | A Level or Higher   | 0 | 60  | N | Pass        |
| 183287 | F | Tigray Region     | Lower Than A Level  | 0 | 90  | Y | Withdrawn   |
| 185021 | F | Addis Ababa       | Lower Than A Level  | 1 | 60  | N | Pass        |
| 186565 | F | Somalia Region    | A Level or Higher   | 1 | 120 | N | Fail        |
| 187257 | F | South Region      | HE Qualification    | 0 | 60  | N | Pass        |
| 187601 | F | South West Region | A Level or Higher   | 0 | 135 | N | Pass        |
| 189035 | F | Somalia Region    | Lower Than A Level  | 0 | 60  | N | Pass        |
| 189986 | F | Afar Region       | Lower Than A Level  | 0 | 60  | N | Withdrawn   |
| 190352 | F | North Region      | No Formal Education | 0 | 60  | N | Fail        |
| 190565 | F | Tigray Region     | Lower Than A Level  | 0 | 60  | Y | Pass        |
| 194073 | F | Amhara Region     | A Level or Higher   | 0 | 120 | N | Withdrawn   |
| 200506 | F | Amhara Region     | Lower Than A Level  | 0 | 60  | N | Withdrawn   |
| 201431 | F | Tigray Region     | Lower Than A Level  | 0 | 120 | N | Pass        |
| 202394 | F | Tigray Region     | A Level or Higher   | 0 | 60  | N | Distinction |
| 206003 | F | Oromia Region     | A Level or Higher   | 0 | 60  | N | Distinction |
| 226747 | F | Addis Ababa       | A Level or Higher   | 0 | 60  | N | Distinction |
| 228481 | F | Sidamo Region     | A Level or Higher   | 0 | 90  | N | Pass        |
| 228784 | F | South West Region | Lower Than A Level  | 3 | 120 | N | Pass        |
| 228824 | F | Tigray Region     | HE Qualification    | 0 | 120 | N | Pass        |
| 231959 | F | North Region      | Lower Than A Level  | 2 | 180 | N | Fail        |
| 232539 | F | Oromia Region     | Lower Than A Level  | 0 | 60  | N | Distinction |
| 233095 | F | South Region      | A Level or Higher   | 0 | 60  | N | Pass        |
| 233102 | F | Oromia Region     | Lower Than A Level  | 1 | 240 | N | Pass        |
| 235097 | F | Amhara Region     | Lower Than A Level  | 2 | 120 | Y | Withdrawn   |
| 235380 | F | South Region      | Lower Than A Level  | 0 | 60  | N | Fail        |
| 235428 | M | Sidamo Region     | Lower Than A Level  | 1 | 150 | N | Fail        |
| 236161 | F | South Region      | A Level or Higher   | 0 | 60  | N | Pass        |
| 238519 | M | South Region      | Lower Than A Level  | 0 | 120 | N | Withdrawn   |
| 242390 | F | Sidamo Region     | Lower Than A Level  | 1 | 60  | N | Fail        |
| 244064 | F | Amhara Region     | A Level or Higher   | 0 | 60  | N | Distinction |
| 247292 | F | Tigray Region     | Lower Than A Level  | 0 | 60  | N | Pass        |
| 247513 | F | Somalia Region    | HE Qualification    | 0 | 60  | N | Pass        |
| 250123 | F | South Region      | Lower Than A Level  | 0 | 120 | Y | Distinction |
| 252652 | F | Sidamo Region     | A Level or Higher   | 2 | 120 | N | Pass        |
| 260955 | F | Sidamo Region     | Lower Than A Level  | 0 | 120 | N | Fail        |
| 262294 | F | Amhara Region     | Lower Than A Level  | 3 | 120 | Y | Fail        |
| 263098 | M | South West Region | A Level or Higher   | 0 | 90  | N | Withdrawn   |
| 264106 | F | South Region      | Lower Than A Level  | 0 | 120 | N | Pass        |

|        |   |                           |   |     |   |             |
|--------|---|---------------------------|---|-----|---|-------------|
| 265958 | F | Amhara Re Lower Tha       | 4 | 180 | N | Fail        |
| 266744 | F | South Wes A Level or I    | 1 | 240 | N | Withdrawn   |
| 268301 | M | Afar Regio HE Qualific    | 0 | 75  | N | Distinction |
| 270256 | F | Oromia Re A Level or I    | 0 | 60  | N | Withdrawn   |
| 271346 | F | Addis Abak A Level or I   | 2 | 150 | N | Withdrawn   |
| 271467 | F | South Wes A Level or I    | 0 | 150 | N | Fail        |
| 275006 | F | Sidamo Re Lower Tha       | 1 | 120 | N | Withdrawn   |
| 275112 | F | Tigrai Regio No Formal    | 3 | 120 | N | Fail        |
| 279557 | F | Amhara Re A Level or I    | 0 | 60  | N | Withdrawn   |
| 282161 | F | Addis Abak Lower Tha      | 3 | 120 | N | Withdrawn   |
| 282713 | F | Sidamo Re HE Qualific     | 0 | 60  | N | Pass        |
| 283131 | M | South Regi A Level or I   | 0 | 60  | N | Fail        |
| 283564 | F | Addis Abak Lower Tha      | 0 | 60  | N | Fail        |
| 283978 | F | South Wes A Level or I    | 5 | 150 | Y | Fail        |
| 284589 | F | Addis Abak Lower Tha      | 0 | 60  | N | Withdrawn   |
| 284593 | F | Afar Regio Post Gradu     | 0 | 120 | N | Withdrawn   |
| 285567 | F | South Wes Lower Tha       | 0 | 90  | N | Pass        |
| 286914 | F | South Regi HE Qualific    | 0 | 60  | N | Pass        |
| 287004 | F | Sidamo Re HE Qualific     | 0 | 60  | N | Withdrawn   |
| 288717 | F | Amhara Re Lower Tha       | 1 | 60  | N | Withdrawn   |
| 288967 | M | Oromia Re Lower Tha       | 0 | 60  | N | Pass        |
| 289108 | F | Tigrai Regio A Level or I | 1 | 60  | N | Pass        |
| 289993 | F | North Regi HE Qualific    | 0 | 120 | N | Withdrawn   |
| 290914 | M | North Regi A Level or I   | 2 | 120 | Y | Distinction |
| 291844 | F | Addis Abak A Level or I   | 0 | 120 | N | Pass        |
| 291848 | F | Tigrai Regio HE Qualific  | 3 | 120 | N | Fail        |
| 293992 | F | Somalia Re A Level or I   | 0 | 60  | N | Pass        |
| 294513 | F | Tigrai Regio HE Qualific  | 0 | 60  | N | Distinction |
| 295728 | F | Tigrai Regio Lower Tha    | 2 | 120 | N | Fail        |
| 296232 | F | South Wes A Level or I    | 0 | 60  | N | Pass        |
| 297179 | F | North Regi Lower Tha      | 0 | 60  | N | Withdrawn   |
| 299027 | F | Tigrai Regio Lower Tha    | 0 | 120 | N | Fail        |
| 299485 | F | South Wes A Level or I    | 0 | 60  | N | Withdrawn   |
| 304607 | F | South Regi A Level or I   | 0 | 60  | N | Fail        |
| 305307 | M | Amhara Re HE Qualific     | 0 | 60  | N | Withdrawn   |
| 305373 | F | Sidamo Re Lower Tha       | 0 | 150 | Y | Fail        |
| 305824 | F | South Regi A Level or I   | 2 | 60  | N | Withdrawn   |
| 307386 | F | South Wes HE Qualific     | 2 | 180 | N | Pass        |
| 308345 | F | Sidamo Re A Level or I    | 0 | 60  | N | Fail        |
| 311599 | F | Sidamo Re A Level or I    | 0 | 120 | N | Pass        |
| 311889 | F | Tigrai Regio HE Qualific  | 0 | 60  | N | Fail        |
| 312275 | F | Sidamo Re Lower Tha       | 2 | 60  | N | Withdrawn   |
| 313246 | F | South Wes A Level or I    | 0 | 60  | N | Pass        |
| 317855 | F | Addis Abak Lower Tha      | 1 | 120 | N | Withdrawn   |
| 318500 | F | Somalia Re A Level or I   | 0 | 60  | N | Fail        |
| 318876 | F | Sidamo Re A Level or I    | 0 | 150 | N | Pass        |
| 319606 | F | South Wes A Level or I    | 3 | 60  | N | Fail        |



|        |   |                          |   |     |   |             |
|--------|---|--------------------------|---|-----|---|-------------|
| 320363 | F | South Regi Lower Tha     | 0 | 60  | N | Fail        |
| 320661 | F | North Regi A Level or I  | 0 | 180 | N | Withdrawn   |
| 321121 | F | South Regi Lower Tha     | 1 | 120 | N | Pass        |
| 321142 | F | South Wes Lower Tha      | 1 | 60  | N | Fail        |
| 321346 | F | Amhara Re A Level or I   | 0 | 120 | Y | Pass        |
| 322325 | M | South Regi Lower Tha     | 0 | 60  | N | Fail        |
| 322509 | F | South Regi A Level or I  | 0 | 60  | N | Pass        |
| 324907 | F | Tigrai Regi Lower Tha    | 0 | 60  | N | Pass        |
| 325080 | F | Somalia Re A Level or I  | 0 | 120 | N | Pass        |
| 325308 | F | Addis Abak A Level or I  | 0 | 60  | N | Distinction |
| 327003 | F | South Regi HE Qualific   | 0 | 90  | N | Distinction |
| 327641 | F | Addis Abak Lower Tha     | 0 | 60  | N | Pass        |
| 331156 | F | South Regi Lower Tha     | 0 | 60  | N | Pass        |
| 331494 | F | South Regi Lower Tha     | 1 | 120 | N | Withdrawn   |
| 334023 | F | South Regi A Level or I  | 0 | 60  | N | Pass        |
| 334565 | M | Tigrai Regi Post Gradu   | 1 | 120 | N | Distinction |
| 334981 | F | South Regi A Level or I  | 6 | 120 | N | Distinction |
| 336356 | F | South Wes A Level or I   | 0 | 120 | N | Pass        |
| 338168 | F | Addis Abak Lower Tha     | 0 | 120 | N | Fail        |
| 339381 | M | South Regi A Level or I  | 0 | 60  | N | Pass        |
| 340831 | M | South Regi A Level or I  | 1 | 60  | N | Pass        |
| 340962 | F | South Wes A Level or I   | 0 | 60  | N | Withdrawn   |
| 341027 | M | Somalia Re Lower Tha     | 0 | 120 | N | Withdrawn   |
| 342017 | F | South Regi Lower Tha     | 1 | 60  | N | Fail        |
| 347864 | M | South Regi A Level or I  | 1 | 60  | N | Withdrawn   |
| 348771 | F | South Wes Lower Tha      | 0 | 120 | N | Fail        |
| 349258 | F | Tigrai Regi Lower Tha    | 0 | 60  | N | Fail        |
| 349401 | F | Oromia Re A Level or I   | 0 | 180 | Y | Withdrawn   |
| 351767 | F | Oromia Re HE Qualific    | 1 | 60  | N | Withdrawn   |
| 352009 | M | South Regi HE Qualific   | 0 | 60  | N | Fail        |
| 352953 | F | Afar Regi HE Qualific    | 2 | 120 | N | Withdrawn   |
| 354121 | F | South Regi Lower Tha     | 0 | 120 | N | Withdrawn   |
| 354560 | F | South Regi Lower Tha     | 1 | 120 | N | Withdrawn   |
| 354984 | F | South Wes A Level or I   | 0 | 90  | N | Pass        |
| 355147 | F | Oromia Re A Level or I   | 1 | 120 | N | Pass        |
| 355369 | F | Sidamo Re A Level or I   | 2 | 60  | N | Fail        |
| 355643 | F | South Wes A Level or I   | 0 | 60  | N | Pass        |
| 356386 | F | South Wes Lower Tha      | 1 | 60  | Y | Fail        |
| 358054 | F | Afar Regi HE Qualific    | 0 | 60  | N | Withdrawn   |
| 358956 | F | Addis Abak Lower Tha     | 1 | 120 | N | Pass        |
| 359438 | F | Tigrai Regi A Level or I | 2 | 60  | N | Distinction |
| 360190 | F | South Wes Lower Tha      | 1 | 180 | N | Fail        |
| 363110 | F | Oromia Re A Level or I   | 1 | 180 | N | Pass        |
| 363396 | F | South Wes A Level or I   | 0 | 60  | N | Distinction |
| 364712 | F | Sidamo Re No Formal      | 1 | 120 | N | Withdrawn   |
| 365111 | F | Afar Regi HE Qualific    | 1 | 75  | Y | Withdrawn   |
| 365488 | F | Tigrai Regi A Level or I | 2 | 60  | N | Fail        |

|        |   |                          |   |     |   |             |
|--------|---|--------------------------|---|-----|---|-------------|
| 366936 | F | Oromia Re A Level or I   | 1 | 120 | N | Withdrawn   |
| 367535 | F | South Wes Lower Thai     | 0 | 60  | N | Pass        |
| 369715 | F | South Regi Lower Thai    | 1 | 120 | Y | Pass        |
| 370008 | F | Afar Regio A Level or I  | 2 | 120 | N | Fail        |
| 372997 | F | Tigrai Regi HE Qualific  | 0 | 120 | N | Distinction |
| 374515 | F | Addis Abak Lower Thai    | 0 | 60  | Y | Withdrawn   |
| 374747 | M | Sidamo Re Lower Thai     | 0 | 60  | N | Pass        |
| 375711 | F | Tigrai Regi A Level or I | 0 | 60  | N | Fail        |
| 375717 | F | Oromia Re A Level or I   | 0 | 120 | N | Pass        |
| 376868 | F | Somalia Re Lower Thai    | 4 | 180 | N | Fail        |
| 377469 | F | Oromia Re Lower Thai     | 0 | 60  | N | Pass        |
| 377929 | F | South Regi Lower Thai    | 0 | 60  | N | Withdrawn   |
| 379785 | F | South Regi HE Qualific   | 0 | 60  | N | Withdrawn   |
| 380184 | F | Sidamo Re A Level or I   | 0 | 210 | N | Pass        |
| 380204 | F | South Regi A Level or I  | 0 | 60  | N | Pass        |
| 381525 | F | Addis Abak Lower Thai    | 0 | 60  | Y | Withdrawn   |
| 381533 | F | South Wes Lower Thai     | 0 | 60  | N | Pass        |
| 381544 | F | Addis Abak HE Qualific   | 0 | 60  | N | Pass        |
| 381909 | F | Sidamo Re A Level or I   | 0 | 120 | N | Distinction |
| 381917 | F | Addis Abak A Level or I  | 0 | 60  | N | Distinction |
| 382877 | F | North Regi Lower Thai    | 0 | 60  | N | Withdrawn   |
| 383241 | F | Afar Regio HE Qualific   | 0 | 75  | N | Pass        |
| 383967 | F | Addis Abak A Level or I  | 0 | 90  | N | Pass        |
| 384099 | F | Addis Abak Lower Thai    | 1 | 150 | N | Withdrawn   |
| 384636 | F | Tigrai Regi Lower Thai   | 0 | 120 | N | Fail        |
| 384884 | F | South Regi Lower Thai    | 0 | 120 | Y | Pass        |
| 386374 | F | South Regi Lower Thai    | 2 | 60  | N | Fail        |
| 387276 | F | Amhara Re Lower Thai     | 3 | 120 | N | Withdrawn   |
| 388041 | F | Amhara Re A Level or I   | 2 | 120 | N | Withdrawn   |
| 388168 | F | South Regi A Level or I  | 2 | 60  | N | Withdrawn   |
| 389249 | F | Tigrai Regi A Level or I | 0 | 60  | N | Pass        |
| 391153 | F | South Wes A Level or I   | 0 | 120 | N | Pass        |
| 391556 | F | Tigrai Regi No Formal    | 0 | 60  | N | Fail        |
| 392604 | F | South Regi Lower Thai    | 0 | 90  | N | Pass        |
| 392733 | F | Sidamo Re HE Qualific    | 0 | 120 | N | Fail        |
| 393131 | F | Afar Regio Lower Thai    | 0 | 60  | N | Fail        |
| 394010 | M | South Wes Lower Thai     | 0 | 180 | N | Withdrawn   |
| 394067 | F | South Regi Lower Thai    | 0 | 90  | N | Distinction |
| 394331 | F | Somalia Re Lower Thai    | 0 | 60  | N | Pass        |
| 394480 | F | South Regi Lower Thai    | 0 | 60  | N | Fail        |
| 394520 | F | North Regi Lower Thai    | 0 | 120 | N | Pass        |
| 395374 | F | Sidamo Re HE Qualific    | 0 | 120 | N | Pass        |
| 396456 | F | Tigrai Regi HE Qualific  | 0 | 60  | N | Distinction |
| 396799 | F | Oromia Re A Level or I   | 0 | 120 | N | Distinction |
| 397312 | F | Sidamo Re A Level or I   | 0 | 60  | N | Fail        |
| 397747 | F | South Regi Lower Thai    | 2 | 60  | N | Pass        |
| 397829 | M | Tigrai Regi A Level or I | 0 | 60  | N | Pass        |

|        |   |                          |   |     |   |             |
|--------|---|--------------------------|---|-----|---|-------------|
| 400729 | F | Addis Abat HE Qualific   | 0 | 60  | N | Withdrawn   |
| 401441 | F | South Regi Lower Tha     | 1 | 60  | N | Fail        |
| 405268 | F | Amhara Re A Level or I   | 0 | 120 | N | Distinction |
| 406600 | F | Tigrai Regi A Level or I | 0 | 60  | N | Pass        |
| 406974 | M | South Regi A Level or I  | 2 | 240 | N | Fail        |
| 407545 | F | Oromia Re A Level or I   | 0 | 75  | N | Withdrawn   |
| 408469 | F | South Regi A Level or I  | 1 | 210 | N | Withdrawn   |
| 408581 | F | Addis Abat A Level or I  | 1 | 180 | N | Distinction |
| 411895 | F | Addis Abat Lower Tha     | 3 | 120 | N | Fail        |
| 412156 | M | South Regi A Level or I  | 0 | 60  | N | Withdrawn   |
| 415298 | F | Oromia Re Lower Tha      | 1 | 120 | N | Fail        |
| 417263 | F | Addis Abat A Level or I  | 0 | 60  | N | Pass        |
| 417684 | F | Oromia Re A Level or I   | 2 | 60  | N | Distinction |
| 420641 | F | South Regi Lower Tha     | 0 | 60  | N | Withdrawn   |
| 420663 | F | Oromia Re Lower Tha      | 1 | 60  | N | Pass        |
| 421326 | F | Tigrai Regi Lower Tha    | 0 | 120 | N | Fail        |
| 421992 | F | Addis Abat Lower Tha     | 2 | 60  | N | Fail        |
| 423652 | F | Addis Abat Lower Tha     | 0 | 120 | Y | Distinction |
| 424014 | F | Afar Regioi Lower Tha    | 2 | 120 | N | Pass        |
| 424659 | F | South Regi HE Qualific   | 0 | 60  | N | Withdrawn   |
| 424863 | F | South Wes Lower Tha      | 4 | 120 | N | Fail        |
| 429099 | F | Sidamo Re A Level or I   | 2 | 90  | N | Distinction |
| 429417 | M | Afar Regioi Lower Tha    | 0 | 60  | N | Pass        |
| 429777 | F | South Wes Lower Tha      | 0 | 120 | Y | Withdrawn   |
| 430002 | M | South Regi Lower Tha     | 0 | 60  | N | Fail        |
| 432480 | M | Amhara Re A Level or I   | 0 | 60  | N | Pass        |
| 435057 | F | South Regi Lower Tha     | 0 | 120 | N | Fail        |
| 435282 | F | South Wes A Level or I   | 2 | 60  | Y | Fail        |
| 437171 | F | Somalia Re A Level or I  | 0 | 60  | N | Pass        |
| 437565 | F | Addis Abat Lower Tha     | 0 | 60  | N | Pass        |
| 438775 | F | South Regi A Level or I  | 1 | 60  | N | Withdrawn   |
| 439109 | F | South Regi Lower Tha     | 1 | 60  | N | Fail        |
| 439710 | F | Oromia Re A Level or I   | 0 | 120 | N | Distinction |
| 439925 | F | Sidamo Re Lower Tha      | 0 | 60  | N | Withdrawn   |
| 440075 | F | Somalia Re A Level or I  | 1 | 90  | N | Withdrawn   |
| 440664 | F | Afar Regioi Lower Tha    | 2 | 60  | N | Withdrawn   |
| 442497 | F | Sidamo Re Lower Tha      | 0 | 90  | N | Fail        |
| 444221 | F | Afar Regioi A Level or I | 0 | 60  | N | Withdrawn   |
| 444561 | F | Tigrai Regi Lower Tha    | 1 | 60  | N | Pass        |
| 444858 | F | Sidamo Re A Level or I   | 1 | 120 | N | Fail        |
| 444872 | F | Oromia Re Lower Tha      | 0 | 60  | N | Pass        |
| 445136 | F | Oromia Re HE Qualific    | 0 | 60  | N | Withdrawn   |
| 445415 | F | South Regi A Level or I  | 0 | 120 | N | Pass        |
| 445494 | M | South Regi HE Qualific   | 1 | 60  | N | Pass        |
| 446296 | F | Tigrai Regi Lower Tha    | 2 | 180 | N | Fail        |
| 446650 | M | Sidamo Re A Level or I   | 0 | 120 | N | Pass        |
| 446755 | F | South Wes HE Qualific    | 0 | 60  | N | Distinction |

|        |   |                          |   |     |   |             |
|--------|---|--------------------------|---|-----|---|-------------|
| 447184 | F | Oromia Re Lower Tha      | 0 | 60  | N | Pass        |
| 447265 | F | Sidamo Re No Formal      | 0 | 180 | N | Pass        |
| 447292 | F | Amhara Re HE Qualific    | 1 | 60  | N | Fail        |
| 465369 | F | Addis Abak A Level or I  | 0 | 120 | N | Pass        |
| 466248 | F | Addis Abak Lower Tha     | 1 | 60  | N | Withdrawn   |
| 466377 | F | Sidamo Re A Level or I   | 0 | 60  | N | Withdrawn   |
| 466856 | F | South Wes A Level or I   | 0 | 180 | N | Distinction |
| 467100 | F | South Regi Lower Tha     | 0 | 120 | N | Fail        |
| 467303 | F | South Wes A Level or I   | 0 | 60  | N | Pass        |
| 467580 | F | Afar Regio A Level or I  | 0 | 120 | N | Pass        |
| 468349 | F | Addis Abak A Level or I  | 1 | 60  | N | Fail        |
| 468529 | F | South Regi Lower Tha     | 0 | 120 | N | Withdrawn   |
| 469177 | M | South Regi HE Qualific   | 0 | 120 | N | Pass        |
| 469664 | F | Somalia Re Lower Tha     | 0 | 210 | N | Withdrawn   |
| 470113 | F | Sidamo Re A Level or I   | 0 | 60  | N | Pass        |
| 470331 | F | Tigrai Regi A Level or I | 0 | 60  | N | Withdrawn   |
| 470693 | F | Afar Regio HE Qualific   | 0 | 60  | N | Distinction |
| 471157 | M | South Wes Lower Tha      | 0 | 120 | N | Fail        |
| 471925 | M | Sidamo Re Lower Tha      | 0 | 60  | N | Pass        |
| 473095 | F | Somalia Re A Level or I  | 2 | 120 | N | Withdrawn   |
| 473509 | M | South Regi Lower Tha     | 2 | 300 | N | Fail        |
| 474607 | F | South Wes Lower Tha      | 0 | 60  | N | Fail        |
| 475631 | F | Somalia Re A Level or I  | 0 | 60  | N | Withdrawn   |
| 475981 | F | South Regi Lower Tha     | 0 | 120 | N | Pass        |
| 476037 | F | South Regi Lower Tha     | 2 | 180 | N | Fail        |
| 477779 | F | Sidamo Re A Level or I   | 0 | 120 | N | Fail        |
| 478242 | F | Sidamo Re Lower Tha      | 0 | 60  | N | Pass        |
| 478317 | F | Afar Regio Lower Tha     | 2 | 90  | N | Fail        |
| 479738 | F | South Regi Lower Tha     | 0 | 130 | N | Pass        |
| 480372 | F | Amhara Re Lower Tha      | 1 | 120 | N | Pass        |
| 480924 | F | Addis Abak Lower Tha     | 1 | 90  | N | Withdrawn   |
| 481150 | F | South Wes A Level or I   | 0 | 120 | N | Pass        |
| 481947 | F | South Regi Lower Tha     | 0 | 180 | N | Fail        |
| 483031 | F | Amhara Re A Level or I   | 0 | 120 | N | Distinction |
| 483411 | F | Somalia Re Lower Tha     | 2 | 120 | N | Fail        |
| 483468 | F | Tigrai Regi HE Qualific  | 0 | 60  | N | Pass        |
| 483485 | F | Tigrai Regi Lower Tha    | 0 | 60  | Y | Pass        |
| 483921 | F | Addis Abak Lower Tha     | 0 | 60  | N | Fail        |
| 484351 | F | South Regi Lower Tha     | 0 | 120 | N | Withdrawn   |
| 484446 | F | South Wes A Level or I   | 1 | 180 | N | Withdrawn   |
| 484821 | F | Oromia Re A Level or I   | 0 | 60  | N | Fail        |
| 484983 | F | South Wes Lower Tha      | 1 | 120 | N | Withdrawn   |
| 485180 | F | South Wes Lower Tha      | 0 | 195 | N | Pass        |
| 485262 | F | North Regi Lower Tha     | 0 | 60  | N | Pass        |
| 485675 | F | Amhara Re A Level or I   | 0 | 60  | N | Fail        |
| 485980 | M | Somalia Re Lower Tha     | 0 | 270 | N | Pass        |
| 486994 | F | Addis Abak A Level or I  | 0 | 120 | N | Distinction |

|        |   |                          |   |     |   |             |
|--------|---|--------------------------|---|-----|---|-------------|
| 487002 | F | Oromia Re A Level or l   | 0 | 180 | N | Distinction |
| 487226 | F | South Regi A Level or l  | 1 | 120 | N | Withdrawn   |
| 487386 | F | Afar Regio Lower Tha     | 0 | 60  | N | Withdrawn   |
| 487543 | M | Addis Abak A Level or l  | 0 | 180 | N | Pass        |
| 487573 | F | Amhara Re A Level or l   | 2 | 120 | N | Withdrawn   |
| 489198 | F | South Regi Lower Tha     | 0 | 120 | N | Fail        |
| 490391 | F | Afar Regio Lower Tha     | 0 | 60  | N | Pass        |
| 491114 | F | South Regi A Level or l  | 1 | 120 | N | Withdrawn   |
| 492468 | F | South Regi A Level or l  | 0 | 180 | Y | Withdrawn   |
| 492895 | F | Amhara Re A Level or l   | 0 | 60  | N | Withdrawn   |
| 492928 | F | Afar Regio A Level or l  | 0 | 60  | N | Fail        |
| 493559 | F | Afar Regio A Level or l  | 0 | 60  | N | Pass        |
| 494896 | F | Addis Abak Lower Tha     | 1 | 120 | N | Pass        |
| 494948 | F | Sidamo Re A Level or l   | 1 | 120 | N | Withdrawn   |
| 495324 | F | Addis Abak A Level or l  | 2 | 60  | N | Withdrawn   |
| 495876 | F | Oromia Re Lower Tha      | 0 | 60  | N | Fail        |
| 495958 | F | South Wes A Level or l   | 0 | 60  | N | Withdrawn   |
| 496547 | F | Afar Regio A Level or l  | 1 | 120 | N | Withdrawn   |
| 497872 | F | Sidamo Re A Level or l   | 0 | 60  | N | Withdrawn   |
| 499952 | F | Afar Regio A Level or l  | 0 | 60  | N | Withdrawn   |
| 500279 | F | Addis Abak A Level or l  | 1 | 120 | N | Fail        |
| 500395 | F | Somalia Re Lower Tha     | 0 | 60  | N | Withdrawn   |
| 501095 | F | South Wes Lower Tha      | 0 | 60  | N | Pass        |
| 504352 | F | Sidamo Re Lower Tha      | 0 | 90  | N | Fail        |
| 504393 | F | South Regi A Level or l  | 0 | 60  | N | Withdrawn   |
| 504967 | F | Somalia Re Lower Tha     | 0 | 60  | N | Fail        |
| 505151 | F | Afar Regio A Level or l  | 0 | 120 | N | Withdrawn   |
| 505248 | F | South Regi A Level or l  | 0 | 60  | N | Withdrawn   |
| 505899 | F | Tigrai Regi A Level or l | 0 | 60  | Y | Pass        |
| 506622 | F | Sidamo Re A Level or l   | 0 | 120 | N | Distinction |
| 506650 | F | South Wes A Level or l   | 1 | 120 | N | Pass        |
| 507009 | F | Sidamo Re Lower Tha      | 0 | 120 | N | Withdrawn   |
| 507817 | M | Somalia Re Lower Tha     | 2 | 60  | N | Withdrawn   |
| 507983 | F | Sidamo Re A Level or l   | 0 | 60  | N | Fail        |
| 508100 | M | South Regi Lower Tha     | 0 | 120 | N | Fail        |
| 508400 | F | North Regi HE Qualific   | 0 | 150 | N | Fail        |
| 508470 | M | Amhara Re Lower Tha      | 0 | 60  | Y | Pass        |
| 508940 | F | Sidamo Re Lower Tha      | 2 | 120 | N | Pass        |
| 509696 | F | Addis Abak A Level or l  | 1 | 60  | N | Pass        |
| 510141 | F | Addis Abak Lower Tha     | 2 | 120 | Y | Fail        |
| 511238 | M | Addis Abak HE Qualific   | 0 | 120 | N | Withdrawn   |
| 511469 | F | Somalia Re Lower Tha     | 0 | 60  | N | Withdrawn   |
| 511506 | F | Oromia Re A Level or l   | 0 | 60  | Y | Fail        |
| 511901 | F | Sidamo Re A Level or l   | 0 | 120 | N | Pass        |
| 512118 | F | Oromia Re Lower Tha      | 0 | 60  | N | Withdrawn   |
| 513077 | F | Tigrai Regi Lower Tha    | 0 | 120 | Y | Fail        |
| 514031 | M | South Wes Lower Tha      | 1 | 180 | Y | Pass        |

|        |   |                          |   |     |   |             |
|--------|---|--------------------------|---|-----|---|-------------|
| 515648 | F | Oromia Re Lower Tha      | 1 | 60  | Y | Withdrawn   |
| 516601 | F | Oromia Re Lower Tha      | 0 | 60  | N | Fail        |
| 517075 | F | South Wes A Level or I   | 1 | 120 | N | Withdrawn   |
| 517679 | F | Sidamo Re A Level or I   | 0 | 120 | N | Distinction |
| 518711 | F | Amhara Re A Level or I   | 2 | 60  | N | Fail        |
| 519078 | M | Addis Abak Lower Tha     | 0 | 60  | N | Pass        |
| 519084 | F | Tigrai Regi Lower Tha    | 1 | 60  | N | Fail        |
| 519859 | F | Oromia Re A Level or I   | 0 | 60  | N | Pass        |
| 521671 | F | South Regi A Level or I  | 0 | 60  | N | Fail        |
| 521957 | F | South Wes Lower Tha      | 3 | 120 | N | Withdrawn   |
| 522087 | F | South Regi A Level or I  | 0 | 60  | N | Distinction |
| 523021 | F | South Regi Lower Tha     | 1 | 180 | N | Withdrawn   |
| 523247 | F | Addis Abak Lower Tha     | 0 | 120 | N | Distinction |
| 524290 | F | South Regi Lower Tha     | 1 | 180 | N | Pass        |
| 525027 | F | Oromia Re A Level or I   | 0 | 60  | N | Withdrawn   |
| 525942 | M | Afar Regio Lower Tha     | 1 | 120 | Y | Fail        |
| 526285 | F | Afar Regio A Level or I  | 0 | 60  | N | Pass        |
| 526948 | F | Sidamo Re Lower Tha      | 0 | 240 | N | Withdrawn   |
| 529438 | M | Tigrai Regi A Level or I | 0 | 60  | N | Fail        |
| 529439 | F | Addis Abak Lower Tha     | 1 | 120 | N | Fail        |
| 529705 | F | South Regi Lower Tha     | 1 | 120 | N | Withdrawn   |
| 531290 | F | Addis Abak Lower Tha     | 0 | 60  | N | Withdrawn   |
| 531755 | F | Afar Regio HE Qualific   | 1 | 120 | N | Pass        |
| 532274 | F | South Regi A Level or I  | 0 | 150 | N | Fail        |
| 532468 | F | North Regi Lower Tha     | 0 | 180 | N | Withdrawn   |
| 532617 | F | Somalia Re A Level or I  | 0 | 60  | N | Distinction |
| 533077 | F | North Regi Lower Tha     | 0 | 90  | N | Fail        |
| 533210 | F | Oromia Re A Level or I   | 0 | 120 | N | Distinction |
| 533527 | F | Addis Abak Lower Tha     | 0 | 90  | N | Fail        |
| 534143 | F | South Regi Lower Tha     | 0 | 60  | N | Fail        |
| 534163 | F | South Wes Lower Tha      | 0 | 120 | N | Fail        |
| 534428 | F | North Regi Lower Tha     | 0 | 120 | N | Withdrawn   |
| 534830 | F | South Regi Lower Tha     | 1 | 60  | N | Withdrawn   |
| 535077 | F | Sidamo Re HE Qualific    | 0 | 60  | N | Pass        |
| 535462 | F | South Wes A Level or I   | 0 | 60  | N | Fail        |
| 535506 | M | Tigrai Regi A Level or I | 1 | 120 | N | Pass        |
| 535548 | F | Somalia Re Lower Tha     | 1 | 180 | N | Pass        |
| 536286 | F | South Wes Lower Tha      | 0 | 60  | N | Distinction |
| 536629 | F | South Regi A Level or I  | 0 | 180 | N | Pass        |
| 536805 | F | South Regi A Level or I  | 0 | 60  | N | Pass        |
| 537077 | F | South Regi A Level or I  | 0 | 60  | N | Pass        |
| 537171 | F | North Regi No Formal     | 0 | 90  | N | Pass        |
| 537373 | F | Sidamo Re Lower Tha      | 0 | 60  | N | Pass        |
| 537605 | M | Somalia Re A Level or I  | 1 | 180 | N | Fail        |
| 537698 | F | Addis Abak Lower Tha     | 0 | 60  | Y | Pass        |
| 538196 | M | South Regi A Level or I  | 1 | 60  | N | Withdrawn   |
| 539675 | F | Oromia Re Lower Tha      | 1 | 120 | N | Fail        |

|        |   |                            |   |     |   |             |
|--------|---|----------------------------|---|-----|---|-------------|
| 539894 | F | Sidamo Re HE Qualific      | 0 | 120 | N | Pass        |
| 540558 | F | Somalia Re Lower Than      | 0 | 120 | N | Pass        |
| 541769 | F | Addis Abab Lower Than      | 0 | 60  | N | Pass        |
| 542456 | F | Sidamo Re A Level or I     | 0 | 60  | N | Withdrawn   |
| 542466 | F | Afar Region A Level or I   | 2 | 120 | N | Pass        |
| 542547 | F | Tigray Region A Level or I | 1 | 180 | N | Pass        |
| 542562 | F | Oromia Re A Level or I     | 2 | 240 | Y | Withdrawn   |
| 543963 | M | Oromia Re Lower Than       | 0 | 180 | Y | Withdrawn   |
| 544050 | F | Tigray Region A Level or I | 2 | 120 | N | Fail        |
| 544430 | M | Oromia Re A Level or I     | 1 | 60  | N | Fail        |
| 545146 | F | Addis Abab A Level or I    | 0 | 60  | N | Pass        |
| 545160 | F | Afar Region Lower Than     | 2 | 180 | N | Withdrawn   |
| 545196 | F | South West Lower Than      | 0 | 60  | N | Pass        |
| 545223 | F | Somalia Re Lower Than      | 1 | 60  | N | Fail        |
| 545254 | M | South West Lower Than      | 0 | 60  | N | Pass        |
| 546202 | F | South Region Lower Than    | 1 | 60  | N | Pass        |
| 546302 | F | Somalia Re A Level or I    | 0 | 120 | N | Fail        |
| 547018 | F | Addis Abab A Level or I    | 0 | 60  | N | Fail        |
| 547268 | F | Addis Abab Lower Than      | 0 | 60  | Y | Withdrawn   |
| 547487 | F | South Region Lower Than    | 0 | 120 | N | Distinction |
| 547556 | F | South Region Lower Than    | 0 | 120 | N | Fail        |
| 548296 | F | South Region A Level or I  | 1 | 60  | N | Fail        |
| 548445 | F | Somalia Re Lower Than      | 0 | 60  | N | Fail        |
| 548578 | F | South West No Formal       | 0 | 90  | N | Withdrawn   |
| 548844 | F | Sidamo Re Lower Than       | 1 | 120 | N | Fail        |
| 549078 | F | Sidamo Re A Level or I     | 1 | 90  | N | Fail        |
| 549087 | F | Sidamo Re Lower Than       | 0 | 90  | N | Fail        |
| 549190 | F | South Region A Level or I  | 0 | 60  | N | Pass        |
| 549892 | F | Somalia Re Lower Than      | 0 | 60  | N | Withdrawn   |
| 550269 | F | Afar Region Lower Than     | 1 | 120 | N | Pass        |
| 551053 | F | Tigray Region Lower Than   | 1 | 120 | Y | Fail        |
| 551252 | F | South West A Level or I    | 1 | 120 | N | Distinction |
| 551515 | F | Afar Region Lower Than     | 1 | 180 | N | Pass        |
| 551718 | F | Oromia Re A Level or I     | 0 | 60  | N | Fail        |
| 551953 | F | South West HE Qualific     | 0 | 60  | N | Fail        |
| 552025 | M | Amhara Re A Level or I     | 2 | 120 | N | Fail        |
| 552656 | F | South West A Level or I    | 0 | 60  | N | Withdrawn   |
| 552896 | F | Afar Region HE Qualific    | 0 | 90  | N | Withdrawn   |
| 552931 | F | South West Lower Than      | 2 | 120 | Y | Withdrawn   |
| 553000 | F | Somalia Re Lower Than      | 0 | 60  | N | Withdrawn   |
| 553437 | F | Tigray Region A Level or I | 0 | 60  | N | Fail        |
| 553733 | F | Sidamo Re A Level or I     | 0 | 60  | N | Fail        |
| 553807 | F | Oromia Re Lower Than       | 1 | 180 | Y | Fail        |
| 553808 | M | Oromia Re A Level or I     | 0 | 120 | N | Pass        |
| 554004 | M | Somalia Re HE Qualific     | 1 | 120 | N | Pass        |
| 554766 | F | South West Lower Than      | 1 | 60  | N | Withdrawn   |
| 554969 | F | Amhara Re A Level or I     | 0 | 60  | N | Distinction |

|        |   |                |                   |   |     |   |             |
|--------|---|----------------|-------------------|---|-----|---|-------------|
| 555015 | F | Afar Region    | A Level or Higher | 0 | 180 | Y | Distinction |
| 555603 | F | Tigray Region  | A Level or Higher | 1 | 150 | N | Withdrawn   |
| 555720 | F | Amhara Region  | Lower Than A      | 0 | 60  | N | Fail        |
| 555860 | M | South Region   | Lower Than A      | 0 | 60  | N | Fail        |
| 555994 | M | Sidamo Region  | Lower Than A      | 0 | 60  | N | Fail        |
| 556012 | M | Addis Ababa    | Lower Than A      | 0 | 60  | Y | Fail        |
| 556853 | F | South Region   | A Level or Higher | 0 | 60  | N | Pass        |
| 556877 | F | South West     | A Level or Higher | 2 | 120 | N | Pass        |
| 557029 | M | Somalia Region | HE Qualification  | 0 | 130 | N | Fail        |
| 557351 | F | South West     | A Level or Higher | 1 | 120 | N | Fail        |
| 558084 | F | Tigray Region  | Lower Than A      | 1 | 120 | N | Pass        |
| 558595 | F | South Region   | A Level or Higher | 0 | 60  | Y | Pass        |
| 558702 | F | South West     | A Level or Higher | 0 | 60  | N | Withdrawn   |
| 558921 | M | South Region   | HE Qualification  | 1 | 60  | N | Distinction |
| 559065 | F | Sidamo Region  | A Level or Higher | 0 | 120 | N | Fail        |
| 559090 | F | Oromia Region  | No Formal         | 0 | 60  | N | Withdrawn   |
| 559336 | F | South Region   | A Level or Higher | 0 | 60  | N | Pass        |
| 559381 | F | South Region   | HE Qualification  | 0 | 60  | N | Pass        |
| 559467 | F | Addis Ababa    | A Level or Higher | 0 | 150 | N | Pass        |
| 559573 | F | Amhara Region  | A Level or Higher | 0 | 120 | N | Fail        |
| 559831 | F | Somalia Region | A Level or Higher | 0 | 120 | N | Pass        |
| 559861 | F | Oromia Region  | A Level or Higher | 0 | 60  | N | Pass        |
| 560117 | M | South Region   | Lower Than A      | 1 | 60  | N | Fail        |
| 560238 | F | Sidamo Region  | Lower Than A      | 0 | 60  | N | Distinction |
| 560335 | F | Afar Region    | Lower Than A      | 1 | 60  | N | Fail        |
| 560536 | F | Tigray Region  | HE Qualification  | 1 | 120 | N | Pass        |
| 560636 | F | Somalia Region | HE Qualification  | 0 | 60  | N | Withdrawn   |
| 560920 | F | Sidamo Region  | A Level or Higher | 1 | 120 | N | Withdrawn   |
| 561060 | F | Addis Ababa    | A Level or Higher | 0 | 120 | Y | Pass        |
| 561061 | F | Sidamo Region  | A Level or Higher | 0 | 120 | N | Pass        |
| 561674 | F | Addis Ababa    | Lower Than A      | 1 | 120 | N | Fail        |
| 561953 | F | Addis Ababa    | A Level or Higher | 0 | 60  | N | Pass        |
| 561978 | F | South West     | A Level or Higher | 1 | 180 | N | Distinction |
| 562139 | F | South Region   | Lower Than A      | 0 | 60  | N | Withdrawn   |
| 562267 | M | Amhara Region  | Lower Than A      | 0 | 60  | N | Withdrawn   |
| 562438 | F | Somalia Region | A Level or Higher | 0 | 60  | N | Withdrawn   |
| 562642 | M | South West     | Lower Than A      | 0 | 60  | N | Fail        |
| 562643 | F | South West     | A Level or Higher | 0 | 60  | N | Withdrawn   |
| 562783 | F | Somalia Region | Lower Than A      | 0 | 60  | N | Withdrawn   |
| 562857 | F | Sidamo Region  | Lower Than A      | 0 | 60  | N | Pass        |
| 563413 | F | South Region   | A Level or Higher | 0 | 60  | N | Distinction |
| 563487 | F | Addis Ababa    | A Level or Higher | 0 | 75  | N | Pass        |
| 563754 | F | South West     | Lower Than A      | 1 | 120 | N | Pass        |
| 563822 | F | Addis Ababa    | Lower Than A      | 0 | 60  | N | Fail        |
| 563945 | M | Afar Region    | Lower Than A      | 0 | 90  | N | Withdrawn   |
| 563986 | F | Amhara Region  | Lower Than A      | 0 | 75  | N | Fail        |
| 563987 | F | Amhara Region  | A Level or Higher | 0 | 120 | N | Pass        |



|        |   |                |                     |   |     |   |             |
|--------|---|----------------|---------------------|---|-----|---|-------------|
| 564409 | M | Afar Region    | A Level or Higher   | 1 | 120 | N | Pass        |
| 564460 | F | Sidamo Region  | No Formal Education | 0 | 60  | N | Withdrawn   |
| 564810 | F | Addis Ababa    | A Level or Higher   | 0 | 120 | N | Withdrawn   |
| 564906 | M | Amhara Region  | Lower Than A Level  | 0 | 120 | N | Pass        |
| 565008 | F | South Region   | A Level or Higher   | 0 | 120 | N | Withdrawn   |
| 565009 | F | Addis Ababa    | Lower Than A Level  | 0 | 60  | N | Fail        |
| 565344 | F | Sidamo Region  | A Level or Higher   | 0 | 60  | N | Fail        |
| 565402 | F | South Region   | Lower Than A Level  | 1 | 180 | N | Withdrawn   |
| 565869 | F | Addis Ababa    | Lower Than A Level  | 0 | 60  | N | Pass        |
| 565988 | F | North Region   | Lower Than A Level  | 0 | 120 | N | Fail        |
| 566181 | F | South West     | A Level or Higher   | 0 | 60  | N | Pass        |
| 566669 | F | Oromia Region  | A Level or Higher   | 0 | 60  | N | Pass        |
| 567048 | F | Addis Ababa    | A Level or Higher   | 0 | 60  | N | Pass        |
| 567059 | F | Somalia Region | Lower Than A Level  | 1 | 120 | N | Pass        |
| 567273 | F | Amhara Region  | A Level or Higher   | 0 | 60  | Y | Withdrawn   |
| 567757 | F | Tigray Region  | A Level or Higher   | 0 | 60  | N | Pass        |
| 567889 | F | South West     | Lower Than A Level  | 0 | 60  | N | Pass        |
| 567963 | F | Sidamo Region  | Lower Than A Level  | 0 | 60  | Y | Pass        |
| 568042 | F | Addis Ababa    | Lower Than A Level  | 1 | 120 | N | Fail        |
| 568370 | F | South Region   | A Level or Higher   | 1 | 120 | N | Pass        |
| 568559 | F | Somalia Region | Lower Than A Level  | 1 | 120 | N | Pass        |
| 568968 | F | South Region   | Lower Than A Level  | 0 | 60  | N | Pass        |
| 569074 | F | South West     | Lower Than A Level  | 0 | 60  | N | Withdrawn   |
| 569199 | F | South Region   | Lower Than A Level  | 0 | 120 | N | Withdrawn   |
| 569225 | F | South Region   | A Level or Higher   | 0 | 90  | N | Pass        |
| 569660 | M | Sidamo Region  | Lower Than A Level  | 1 | 180 | N | Withdrawn   |
| 569663 | F | South Region   | Lower Than A Level  | 0 | 60  | N | Pass        |
| 569664 | M | Sidamo Region  | Lower Than A Level  | 0 | 60  | N | Pass        |
| 569761 | F | Somalia Region | Lower Than A Level  | 0 | 60  | N | Pass        |
| 569864 | F | Sidamo Region  | Lower Than A Level  | 0 | 120 | N | Pass        |
| 569970 | F | Somalia Region | Lower Than A Level  | 0 | 60  | N | Pass        |
| 570031 | F | Amhara Region  | Lower Than A Level  | 0 | 60  | N | Pass        |
| 570133 | F | Afar Region    | HE Qualification    | 0 | 60  | N | Withdrawn   |
| 570177 | F | South West     | Lower Than A Level  | 1 | 180 | N | Fail        |
| 570186 | F | South Region   | Lower Than A Level  | 0 | 60  | N | Withdrawn   |
| 570239 | F | South Region   | Lower Than A Level  | 0 | 120 | N | Fail        |
| 570437 | F | Afar Region    | A Level or Higher   | 0 | 60  | Y | Distinction |
| 570627 | F | Oromia Region  | A Level or Higher   | 0 | 60  | N | Distinction |
| 570721 | F | Somalia Region | HE Qualification    | 0 | 60  | N | Withdrawn   |
| 571223 | F | Addis Ababa    | Lower Than A Level  | 0 | 60  | N | Pass        |
| 571540 | F | Addis Ababa    | Lower Than A Level  | 1 | 120 | N | Pass        |
| 571614 | F | South West     | Lower Than A Level  | 1 | 180 | N | Pass        |
| 571732 | F | Oromia Region  | Lower Than A Level  | 1 | 180 | N | Withdrawn   |
| 571880 | F | Afar Region    | Lower Than A Level  | 0 | 120 | N | Pass        |
| 571897 | F | Somalia Region | A Level or Higher   | 0 | 120 | Y | Pass        |
| 571954 | M | Sidamo Region  | HE Qualification    | 0 | 120 | N | Pass        |
| 572187 | F | Afar Region    | HE Qualification    | 0 | 120 | N | Fail        |

|        |   |                          |   |     |   |             |
|--------|---|--------------------------|---|-----|---|-------------|
| 572290 | M | Oromia Re HE Qualific    | 1 | 180 | N | Pass        |
| 572370 | F | Somalia Re A Level or I  | 0 | 210 | N | Withdrawn   |
| 572378 | F | Sidamo Re Lower Than     | 0 | 240 | Y | Withdrawn   |
| 572987 | M | Sidamo Re Lower Than     | 1 | 180 | Y | Withdrawn   |
| 573000 | F | Sidamo Re HE Qualific    | 0 | 120 | N | Withdrawn   |
| 573108 | F | South Regi A Level or I  | 0 | 120 | N | Withdrawn   |
| 573323 | F | South Wes A Level or I   | 0 | 120 | N | Distinction |
| 573488 | F | Addis Abat Lower Than    | 1 | 120 | N | Pass        |
| 573496 | F | South Regi A Level or I  | 1 | 180 | N | Pass        |
| 573806 | F | Oromia Re A Level or I   | 0 | 120 | N | Distinction |
| 573824 | F | Oromia Re Lower Than     | 0 | 120 | N | Withdrawn   |
| 573851 | F | Somalia Re Lower Than    | 0 | 120 | N | Pass        |
| 573853 | F | South Wes A Level or I   | 0 | 60  | N | Pass        |
| 574057 | F | Sidamo Re Lower Than     | 0 | 60  | N | Fail        |
| 574264 | F | Somalia Re Lower Than    | 0 | 120 | N | Withdrawn   |
| 574553 | F | Sidamo Re Lower Than     | 0 | 150 | N | Withdrawn   |
| 574569 | F | Sidamo Re A Level or I   | 0 | 120 | N | Pass        |
| 574748 | F | South Regi Lower Than    | 1 | 150 | N | Withdrawn   |
| 574935 | F | Addis Abat Lower Than    | 0 | 120 | N | Withdrawn   |
| 574944 | F | South Regi A Level or I  | 0 | 60  | N | Withdrawn   |
| 575251 | F | Afar Regioi A Level or I | 0 | 120 | Y | Withdrawn   |
| 575602 | F | Sidamo Re A Level or I   | 0 | 120 | N | Pass        |
| 575680 | F | Oromia Re Lower Than     | 1 | 120 | N | Pass        |
| 575980 | F | Sidamo Re Lower Than     | 0 | 120 | N | Withdrawn   |
| 575990 | F | South Wes Lower Than     | 0 | 60  | N | Withdrawn   |
| 576179 | F | Amhara Re No Formal      | 0 | 60  | N | Withdrawn   |
| 576375 | F | Amhara Re Lower Than     | 1 | 120 | N | Pass        |
| 576738 | F | South Regi Lower Than    | 0 | 120 | N | Distinction |
| 577170 | F | South Regi HE Qualific   | 1 | 150 | N | Fail        |
| 577304 | F | Amhara Re Lower Than     | 1 | 120 | N | Fail        |
| 577527 | F | Oromia Re Lower Than     | 1 | 120 | N | Pass        |
| 577676 | F | South Regi HE Qualific   | 0 | 60  | N | Pass        |
| 577905 | F | South Wes Lower Than     | 1 | 120 | N | Fail        |
| 578003 | F | South Wes HE Qualific    | 0 | 120 | N | Fail        |
| 578282 | F | North Regi Lower Than    | 0 | 120 | N | Fail        |
| 578574 | F | Somalia Re Lower Than    | 1 | 120 | N | Pass        |
| 579255 | F | Tigrai Regio Lower Than  | 1 | 120 | N | Withdrawn   |
| 579448 | F | Afar Regioi Lower Than   | 1 | 120 | N | Withdrawn   |
| 579537 | F | South Wes A Level or I   | 0 | 60  | N | Pass        |
| 579720 | F | South Regi A Level or I  | 0 | 60  | N | Fail        |
| 580688 | F | South Regi A Level or I  | 0 | 180 | N | Distinction |
| 581222 | M | Somalia Re A Level or I  | 0 | 240 | N | Pass        |
| 581333 | F | South Wes A Level or I   | 0 | 120 | N | Withdrawn   |
| 581353 | F | South Wes Lower Than     | 0 | 180 | N | Pass        |
| 581459 | F | South Wes Lower Than     | 1 | 120 | N | Fail        |
| 581647 | F | Somalia Re Lower Than    | 1 | 120 | Y | Withdrawn   |
| 582496 | F | South Regi Lower Than    | 0 | 120 | N | Withdrawn   |

|        |   |                          |   |     |   |             |
|--------|---|--------------------------|---|-----|---|-------------|
| 582742 | F | South Regi Lower Thar    | 0 | 120 | N | Fail        |
| 583102 | F | Addis Abak A Level or I  | 0 | 120 | N | Fail        |
| 583950 | F | Amhara Re Lower Thar     | 0 | 60  | N | Fail        |
| 584566 | F | Sidamo Re No Formal      | 0 | 60  | N | Withdrawn   |
| 584632 | F | South Regi Lower Thar    | 1 | 180 | N | Fail        |
| 584762 | F | Addis Abak Lower Thar    | 1 | 120 | N | Withdrawn   |
| 585048 | M | Amhara Re HE Qualific    | 0 | 120 | N | Pass        |
| 585150 | F | South Regi A Level or I  | 0 | 60  | N | Pass        |
| 585283 | F | South Regi A Level or I  | 0 | 120 | N | Withdrawn   |
| 585547 | F | Sidamo Re A Level or I   | 0 | 120 | N | Pass        |
| 585727 | F | Addis Abak A Level or I  | 0 | 120 | N | Fail        |
| 586086 | F | Tigrai Regi Lower Thar   | 0 | 60  | N | Pass        |
| 586111 | F | South Regi Lower Thar    | 1 | 120 | Y | Fail        |
| 586133 | F | Sidamo Re A Level or I   | 0 | 270 | N | Withdrawn   |
| 586417 | F | Amhara Re A Level or I   | 0 | 60  | N | Withdrawn   |
| 586435 | F | Sidamo Re Lower Thar     | 0 | 120 | N | Withdrawn   |
| 586712 | F | Somalia Re A Level or I  | 0 | 120 | N | Pass        |
| 586995 | F | South Regi Lower Thar    | 0 | 120 | N | Pass        |
| 587181 | F | South Regi A Level or I  | 0 | 60  | N | Pass        |
| 587524 | F | Sidamo Re A Level or I   | 0 | 120 | N | Distinction |
| 587538 | F | Oromia Re Lower Thar     | 0 | 120 | N | Distinction |
| 587780 | F | Amhara Re A Level or I   | 0 | 120 | N | Pass        |
| 588039 | F | Oromia Re A Level or I   | 0 | 120 | N | Pass        |
| 588096 | F | South Regi Lower Thar    | 0 | 60  | N | Withdrawn   |
| 588302 | F | Afar Regioi A Level or I | 0 | 60  | N | Pass        |
| 588459 | F | Tigrai Regi Lower Thar   | 1 | 120 | N | Fail        |
| 588484 | F | Sidamo Re A Level or I   | 0 | 60  | N | Pass        |
| 588495 | F | South Wes Lower Thar     | 0 | 120 | N | Withdrawn   |
| 588592 | F | Tigrai Regi Lower Thar   | 0 | 240 | Y | Withdrawn   |
| 588685 | F | Afar Regioi HE Qualific  | 1 | 120 | Y | Fail        |
| 589300 | F | Amhara Re Lower Thar     | 0 | 120 | N | Withdrawn   |
| 589333 | F | South Regi A Level or I  | 0 | 120 | N | Pass        |
| 589444 | F | South Wes A Level or I   | 0 | 120 | N | Distinction |
| 589862 | F | Amhara Re Lower Thar     | 0 | 120 | N | Pass        |
| 589997 | F | South Wes A Level or I   | 0 | 60  | N | Distinction |
| 590408 | F | Sidamo Re Lower Thar     | 0 | 60  | Y | Fail        |
| 590520 | F | South Wes No Formal      | 0 | 120 | N | Fail        |
| 590798 | M | South Regi HE Qualific   | 0 | 60  | N | Withdrawn   |
| 590812 | F | Tigrai Regi Lower Thar   | 1 | 120 | N | Fail        |
| 590870 | F | Oromia Re A Level or I   | 0 | 60  | N | Fail        |
| 591094 | F | South Regi Lower Thar    | 0 | 90  | N | Withdrawn   |
| 591309 | F | Amhara Re Lower Thar     | 0 | 180 | N | Withdrawn   |
| 591547 | F | North Regi A Level or I  | 0 | 120 | N | Fail        |
| 591725 | F | Tigrai Regi Lower Thar   | 1 | 120 | N | Fail        |
| 591743 | F | North Regi Lower Thar    | 0 | 60  | N | Fail        |
| 592193 | F | Oromia Re A Level or I   | 0 | 120 | N | Distinction |
| 592602 | F | South Regi Lower Thar    | 0 | 120 | N | Withdrawn   |

|        |   |                         |   |     |   |             |
|--------|---|-------------------------|---|-----|---|-------------|
| 592725 | M | South Regi A Level or I | 0 | 180 | N | Pass        |
| 593345 | F | Sidamo Re A Level or I  | 0 | 240 | N | Fail        |
| 593465 | F | Sidamo Re A Level or I  | 0 | 60  | N | Withdrawn   |
| 594061 | F | Addis Abak A Level or I | 0 | 60  | N | Distinction |
| 594417 | F | Sidamo Re HE Qualific   | 0 | 60  | N | Pass        |
| 594774 | F | South Regi A Level or I | 1 | 120 | N | Fail        |
| 595047 | F | Somalia Re Lower Tha    | 1 | 180 | N | Pass        |
| 596171 | M | North Regi HE Qualific  | 0 | 70  | N | Distinction |
| 596533 | F | Sidamo Re A Level or I  | 0 | 180 | N | Pass        |
| 596602 | F | Afar Regio A Level or I | 0 | 60  | N | Withdrawn   |
| 597316 | F | Amhara Re Lower Tha     | 0 | 120 | Y | Pass        |
| 597321 | F | Amhara Re Lower Tha     | 1 | 120 | N | Fail        |
| 597610 | F | Tigrai Regi Lower Tha   | 0 | 75  | N | Withdrawn   |
| 597730 | F | Somalia Re A Level or I | 0 | 180 | N | Fail        |
| 597744 | F | North Regi Lower Tha    | 0 | 120 | N | Withdrawn   |
| 597882 | F | Somalia Re A Level or I | 0 | 150 | N | Pass        |
| 598150 | F | South Regi A Level or I | 0 | 180 | N | Withdrawn   |
| 598250 | F | Somalia Re Lower Tha    | 0 | 120 | N | Withdrawn   |
| 598313 | M | Sidamo Re A Level or I  | 0 | 120 | N | Withdrawn   |
| 598415 | F | South Regi Lower Tha    | 0 | 120 | N | Withdrawn   |
| 598451 | M | Addis Abak Lower Tha    | 0 | 120 | N | Withdrawn   |
| 598495 | F | Afar Regio HE Qualific  | 0 | 60  | N | Fail        |
| 598614 | F | Afar Regio A Level or I | 0 | 120 | N | Pass        |
| 598624 | F | Somalia Re A Level or I | 0 | 120 | N | Pass        |
| 598694 | F | South Regi A Level or I | 0 | 120 | N | Pass        |
| 598836 | F | South Regi A Level or I | 0 | 120 | N | Withdrawn   |
| 598918 | M | South Wes A Level or I  | 0 | 60  | N | Distinction |
| 599132 | F | Amhara Re HE Qualific   | 0 | 60  | N | Pass        |
| 599161 | F | Afar Regio Lower Tha    | 1 | 120 | N | Fail        |
| 599202 | F | Afar Regio A Level or I | 1 | 120 | N | Distinction |
| 599207 | F | Tigrai Regi Lower Tha   | 0 | 60  | Y | Pass        |
| 599382 | F | South Wes HE Qualific   | 0 | 180 | N | Withdrawn   |
| 599430 | F | Afar Regio HE Qualific  | 0 | 120 | N | Withdrawn   |
| 599480 | F | Sidamo Re Lower Tha     | 1 | 120 | N | Withdrawn   |
| 599495 | F | South Wes A Level or I  | 0 | 60  | N | Distinction |
| 599769 | F | South Regi Lower Tha    | 0 | 150 | Y | Fail        |
| 599990 | F | Somalia Re A Level or I | 1 | 180 | N | Pass        |
| 600259 | F | Oromia Re Lower Tha     | 0 | 120 | N | Withdrawn   |
| 600407 | F | Amhara Re Lower Tha     | 1 | 180 | N | Withdrawn   |
| 601010 | M | Tigrai Regi HE Qualific | 0 | 60  | N | Pass        |
| 601238 | F | Somalia Re Lower Tha    | 1 | 120 | N | Pass        |
| 601316 | F | South Wes Lower Tha     | 0 | 120 | N | Withdrawn   |
| 601356 | F | Addis Abak Lower Tha    | 0 | 120 | N | Distinction |
| 601616 | F | South Regi A Level or I | 0 | 90  | N | Pass        |
| 601862 | F | Tigrai Regi Lower Tha   | 0 | 60  | N | Pass        |
| 602011 | F | Afar Regio Lower Tha    | 1 | 120 | Y | Fail        |
| 602815 | F | Sidamo Re Lower Tha     | 0 | 60  | N | Fail        |

|        |   |                          |   |     |   |             |
|--------|---|--------------------------|---|-----|---|-------------|
| 602898 | F | Sidamo Re, Lower Tha     | 0 | 60  | N | Withdrawn   |
| 602929 | F | South Regi Lower Tha     | 0 | 60  | N | Fail        |
| 602991 | F | Amhara Re A Level or I   | 0 | 60  | N | Pass        |
| 603061 | F | South Wes Lower Tha      | 0 | 60  | N | Withdrawn   |
| 603112 | F | South Regi Lower Tha     | 0 | 120 | N | Pass        |
| 603348 | F | South Regi Lower Tha     | 0 | 60  | N | Withdrawn   |
| 603543 | F | Somalia Re Lower Tha     | 0 | 60  | N | Fail        |
| 603739 | F | South Wes Lower Tha      | 0 | 60  | N | Withdrawn   |
| 603762 | F | Oromia Re A Level or I   | 0 | 60  | N | Distinction |
| 603888 | F | South Wes Lower Tha      | 0 | 60  | N | Withdrawn   |
| 604106 | F | South Wes Lower Tha      | 0 | 120 | N | Pass        |
| 604267 | F | Addis Abat A Level or I  | 0 | 120 | N | Withdrawn   |
| 604375 | F | Somalia Re A Level or I  | 0 | 60  | N | Withdrawn   |
| 604962 | F | South Wes A Level or I   | 1 | 120 | N | Pass        |
| 605388 | F | Afar Regioi A Level or I | 0 | 60  | N | Withdrawn   |
| 605474 | F | Afar Regioi A Level or I | 0 | 120 | N | Fail        |
| 605597 | F | Afar Regioi HE Qualific  | 1 | 120 | N | Fail        |
| 605672 | F | South Regi A Level or I  | 0 | 120 | N | Pass        |
| 605693 | F | Addis Abat Lower Tha     | 0 | 60  | N | Pass        |
| 605771 | F | South Regi A Level or I  | 0 | 120 | Y | Withdrawn   |
| 605956 | F | Sidamo Re, A Level or I  | 0 | 60  | N | Withdrawn   |
| 605971 | F | Amhara Re A Level or I   | 0 | 120 | N | Withdrawn   |
| 605996 | F | South Wes A Level or I   | 0 | 120 | N | Pass        |
| 606069 | F | Tigrai Regi Lower Tha    | 1 | 120 | N | Pass        |
| 606075 | F | South Wes Lower Tha      | 0 | 60  | N | Fail        |
| 606155 | F | Amhara Re Lower Tha      | 0 | 60  | N | Withdrawn   |
| 606313 | F | Afar Regioi HE Qualific  | 0 | 75  | Y | Pass        |
| 606335 | F | Amhara Re A Level or I   | 0 | 120 | Y | Withdrawn   |
| 606501 | F | South Regi A Level or I  | 1 | 120 | N | Withdrawn   |
| 606529 | M | South Regi A Level or I  | 0 | 120 | N | Fail        |
| 606634 | F | Somalia Re Lower Tha     | 0 | 90  | N | Pass        |
| 606690 | F | Sidamo Re, HE Qualific   | 0 | 120 | N | Pass        |
| 607108 | F | Addis Abat A Level or I  | 0 | 120 | N | Fail        |
| 607220 | F | Sidamo Re, Lower Tha     | 0 | 60  | N | Pass        |
| 607339 | F | Amhara Re A Level or I   | 0 | 120 | N | Withdrawn   |
| 607380 | F | Oromia Re A Level or I   | 1 | 120 | N | Fail        |
| 607436 | F | Sidamo Re, Lower Tha     | 0 | 180 | Y | Withdrawn   |
| 607487 | F | Addis Abat No Formal     | 0 | 60  | N | Withdrawn   |
| 607529 | F | Afar Regioi HE Qualific  | 0 | 60  | N | Pass        |
| 607646 | F | Sidamo Re, Lower Tha     | 0 | 60  | N | Withdrawn   |
| 607678 | F | Addis Abat No Formal     | 0 | 60  | N | Pass        |
| 607848 | F | Amhara Re Lower Tha      | 1 | 180 | N | Fail        |
| 607953 | F | Sidamo Re, Lower Tha     | 0 | 60  | N | Fail        |
| 607973 | F | North Regi HE Qualific   | 0 | 120 | N | Withdrawn   |
| 608060 | F | Sidamo Re, A Level or I  | 1 | 120 | N | Withdrawn   |
| 608104 | F | South Regi A Level or I  | 0 | 60  | N | Distinction |
| 608110 | F | South Wes A Level or I   | 0 | 60  | N | Pass        |

|        |   |                          |   |     |   |             |
|--------|---|--------------------------|---|-----|---|-------------|
| 608164 | M | South Wes HE Qualific    | 0 | 180 | N | Distinction |
| 608407 | F | North Regi Lower Tha     | 0 | 120 | N | Distinction |
| 608774 | F | Afar Regio Lower Tha     | 0 | 60  | N | Withdrawn   |
| 608961 | F | Amhara Re HE Qualific    | 0 | 60  | N | Fail        |
| 609282 | F | South Regi Lower Tha     | 1 | 120 | N | Withdrawn   |
| 609422 | F | Sidamo Re Lower Tha      | 1 | 120 | N | Withdrawn   |
| 609426 | F | Tigrai Regi Lower Tha    | 0 | 120 | N | Pass        |
| 609596 | F | Addis Abak Lower Tha     | 0 | 60  | N | Distinction |
| 610239 | F | Somalia Re A Level or I  | 0 | 120 | N | Fail        |
| 610340 | F | Tigrai Regi Lower Tha    | 0 | 60  | N | Fail        |
| 610416 | F | Oromia Re Lower Tha      | 0 | 60  | N | Pass        |
| 610494 | F | Tigrai Regi Lower Tha    | 0 | 60  | N | Withdrawn   |
| 610531 | F | Somalia Re Lower Tha     | 0 | 120 | N | Withdrawn   |
| 610589 | F | Somalia Re A Level or I  | 0 | 180 | Y | Withdrawn   |
| 610759 | F | Oromia Re HE Qualific    | 1 | 120 | N | Pass        |
| 610802 | F | Tigrai Regi A Level or I | 1 | 120 | N | Fail        |
| 611233 | M | Oromia Re Lower Tha      | 0 | 60  | N | Withdrawn   |
| 611348 | F | Sidamo Re HE Qualific    | 0 | 90  | N | Pass        |
| 611475 | F | Oromia Re Lower Tha      | 0 | 60  | N | Pass        |
| 611586 | F | Amhara Re Lower Tha      | 0 | 120 | N | Withdrawn   |
| 611649 | F | South Regi A Level or I  | 0 | 120 | N | Withdrawn   |
| 611719 | F | South Regi Lower Tha     | 0 | 60  | N | Fail        |
| 611732 | F | Amhara Re Lower Tha      | 0 | 120 | N | Withdrawn   |
| 611816 | M | Sidamo Re Lower Tha      | 0 | 120 | N | Withdrawn   |
| 611974 | F | Amhara Re Lower Tha      | 0 | 60  | N | Withdrawn   |
| 611977 | F | Addis Abak Lower Tha     | 0 | 120 | N | Withdrawn   |
| 611979 | M | South Regi A Level or I  | 0 | 60  | N | Withdrawn   |
| 612082 | F | Afar Regio HE Qualific   | 0 | 60  | N | Distinction |
| 612113 | F | Tigrai Regi A Level or I | 0 | 60  | N | Fail        |
| 612120 | F | Somalia Re Lower Tha     | 0 | 60  | N | Fail        |
| 612212 | F | Addis Abak A Level or I  | 0 | 120 | Y | Fail        |
| 612370 | F | Sidamo Re A Level or I   | 0 | 60  | N | Fail        |
| 612395 | F | South Regi Lower Tha     | 0 | 60  | N | Withdrawn   |
| 612396 | F | Addis Abak A Level or I  | 0 | 60  | N | Fail        |
| 612561 | F | South Regi Lower Tha     | 0 | 60  | N | Withdrawn   |
| 612600 | F | Somalia Re Lower Tha     | 0 | 60  | N | Fail        |
| 612721 | F | South Wes A Level or I   | 0 | 60  | N | Distinction |
| 612756 | F | Sidamo Re A Level or I   | 0 | 60  | N | Pass        |
| 612841 | F | Tigrai Regi A Level or I | 0 | 60  | N | Pass        |
| 612862 | F | South Regi A Level or I  | 0 | 60  | N | Distinction |
| 612919 | F | Afar Regio A Level or I  | 0 | 75  | N | Pass        |
| 613038 | F | Amhara Re HE Qualific    | 0 | 60  | N | Pass        |
| 613047 | F | Afar Regio Lower Tha     | 0 | 60  | N | Fail        |
| 613093 | F | Sidamo Re A Level or I   | 0 | 60  | N | Pass        |
| 613161 | F | Sidamo Re Lower Tha      | 0 | 60  | N | Withdrawn   |
| 613162 | M | South Wes A Level or I   | 1 | 120 | N | Pass        |
| 613170 | F | South Wes Lower Tha      | 0 | 60  | N | Pass        |

|        |   |                          |   |     |   |             |
|--------|---|--------------------------|---|-----|---|-------------|
| 613199 | F | South Wes A Level or I   | 1 | 120 | Y | Pass        |
| 613205 | F | South Wes A Level or I   | 0 | 60  | N | Fail        |
| 613299 | F | South Regi Lower Tha     | 0 | 60  | N | Fail        |
| 613355 | M | Tigrai Regi A Level or I | 0 | 60  | N | Pass        |
| 613426 | F | Tigrai Regi Lower Tha    | 0 | 60  | N | Pass        |
| 613512 | F | Amhara Re Lower Tha      | 0 | 60  | N | Withdrawn   |
| 613559 | F | Sidamo Re HE Qualific    | 0 | 60  | N | Withdrawn   |
| 613586 | F | Addis Abak Lower Tha     | 0 | 60  | N | Fail        |
| 613641 | F | Sidamo Re HE Qualific    | 0 | 60  | N | Withdrawn   |
| 613703 | F | Tigrai Regi Lower Tha    | 0 | 75  | Y | Fail        |
| 613718 | F | South Wes A Level or I   | 0 | 120 | N | Pass        |
| 613722 | F | Amhara Re Lower Tha      | 0 | 60  | N | Pass        |
| 613743 | F | Tigrai Regi HE Qualific  | 0 | 120 | N | Pass        |
| 613791 | F | Afar Regi A Level or I   | 0 | 60  | N | Withdrawn   |
| 613832 | F | Sidamo Re Lower Tha      | 0 | 120 | N | Fail        |
| 613842 | F | Addis Abak A Level or I  | 0 | 60  | N | Withdrawn   |
| 613856 | F | Amhara Re Lower Tha      | 0 | 60  | N | Pass        |
| 613864 | F | Addis Abak No Formal     | 0 | 60  | N | Fail        |
| 613874 | F | Addis Abak HE Qualific   | 0 | 60  | N | Pass        |
| 613881 | F | Sidamo Re Lower Tha      | 0 | 60  | N | Pass        |
| 613896 | F | Somalia Re HE Qualific   | 0 | 60  | N | Withdrawn   |
| 613932 | F | Tigrai Regi Lower Tha    | 0 | 60  | N | Fail        |
| 613946 | F | Somalia Re Lower Tha     | 0 | 60  | N | Pass        |
| 613983 | F | Amhara Re A Level or I   | 0 | 60  | N | Withdrawn   |
| 614039 | F | Tigrai Regi A Level or I | 0 | 60  | N | Pass        |
| 614117 | F | Addis Abak HE Qualific   | 0 | 60  | N | Pass        |
| 614130 | F | Somalia Re A Level or I  | 0 | 60  | N | Pass        |
| 614212 | F | Somalia Re Lower Tha     | 0 | 90  | N | Pass        |
| 614270 | F | Oromia Re A Level or I   | 0 | 120 | N | Withdrawn   |
| 614357 | F | Addis Abak A Level or I  | 0 | 60  | N | Distinction |
| 614403 | F | North Regi Lower Tha     | 0 | 60  | N | Fail        |
| 614561 | F | South Wes Lower Tha      | 0 | 60  | N | Withdrawn   |
| 614562 | M | South Regi Lower Tha     | 0 | 60  | N | Withdrawn   |
| 614583 | F | Addis Abak HE Qualific   | 0 | 120 | N | Distinction |
| 614586 | F | Sidamo Re Lower Tha      | 0 | 60  | N | Withdrawn   |
| 614601 | M | Oromia Re A Level or I   | 0 | 60  | Y | Pass        |
| 614629 | M | Sidamo Re HE Qualific    | 0 | 60  | N | Distinction |
| 614668 | F | Tigrai Regi A Level or I | 0 | 60  | N | Pass        |
| 614693 | F | Tigrai Regi Lower Tha    | 0 | 60  | N | Pass        |
| 614728 | F | South Regi A Level or I  | 0 | 60  | N | Pass        |
| 614732 | M | South Regi A Level or I  | 0 | 60  | N | Pass        |
| 614734 | F | South Regi A Level or I  | 0 | 60  | N | Fail        |
| 614738 | M | South Regi A Level or I  | 0 | 60  | N | Distinction |
| 614741 | F | South Regi Lower Tha     | 0 | 60  | N | Pass        |
| 614742 | F | South Regi A Level or I  | 0 | 60  | N | Pass        |
| 614744 | M | South Regi A Level or I  | 0 | 60  | N | Pass        |
| 614745 | M | South Regi A Level or I  | 0 | 60  | N | Pass        |

|        |   |                         |   |     |   |             |
|--------|---|-------------------------|---|-----|---|-------------|
| 614813 | F | Sidamo Re, No Formal    | 0 | 60  | N | Withdrawn   |
| 614871 | F | Sidamo Re, Lower Than   | 0 | 60  | N | Pass        |
| 614909 | F | Afar Region A Level or  | 0 | 60  | N | Distinction |
| 615018 | F | Sidamo Re, A Level or   | 0 | 60  | Y | Withdrawn   |
| 615025 | F | South Regi Lower Than   | 0 | 60  | Y | Pass        |
| 615028 | F | Tigrai Regi A Level or  | 0 | 60  | N | Pass        |
| 615047 | F | South Wes Lower Than    | 0 | 60  | N | Withdrawn   |
| 615090 | F | Sidamo Re, Lower Than   | 0 | 60  | N | Pass        |
| 615173 | F | Amhara Re A Level or    | 0 | 60  | N | Fail        |
| 615212 | F | Somalia Re A Level or   | 0 | 60  | N | Withdrawn   |
| 615218 | F | Amhara Re Lower Than    | 0 | 60  | Y | Fail        |
| 615259 | F | Oromia Re A Level or    | 0 | 120 | N | Pass        |
| 615319 | F | South Wes A Level or    | 0 | 60  | N | Fail        |
| 615443 | F | Oromia Re A Level or    | 0 | 60  | N | Pass        |
| 616332 | F | Sidamo Re, Lower Than   | 0 | 60  | Y | Withdrawn   |
| 616354 | F | Tigrai Regi Lower Than  | 0 | 120 | N | Fail        |
| 616361 | F | Somalia Re Lower Than   | 0 | 60  | N | Withdrawn   |
| 616377 | F | South Regi Lower Than   | 0 | 120 | N | Fail        |
| 616414 | F | Somalia Re Lower Than   | 0 | 60  | N | Withdrawn   |
| 616428 | F | Amhara Re HE Qualific   | 0 | 60  | N | Withdrawn   |
| 616464 | F | Amhara Re A Level or    | 0 | 60  | N | Fail        |
| 616511 | F | South Wes A Level or    | 0 | 60  | N | Distinction |
| 616526 | F | South Regi A Level or   | 0 | 60  | Y | Fail        |
| 616536 | F | South Regi Lower Than   | 0 | 120 | N | Pass        |
| 616670 | F | Afar Region A Level or  | 0 | 60  | N | Pass        |
| 616739 | F | South Regi Lower Than   | 0 | 60  | N | Fail        |
| 616809 | F | Amhara Re Lower Than    | 0 | 60  | N | Withdrawn   |
| 616816 | F | Sidamo Re, A Level or   | 0 | 60  | N | Withdrawn   |
| 616848 | F | North Regi Lower Than   | 0 | 90  | N | Withdrawn   |
| 616914 | F | Sidamo Re, Lower Than   | 0 | 60  | N | Pass        |
| 616919 | F | Addis Abat A Level or   | 0 | 60  | N | Distinction |
| 617012 | M | Afar Region Lower Than  | 0 | 60  | N | Pass        |
| 617126 | F | Afar Region HE Qualific | 0 | 60  | N | Withdrawn   |
| 617134 | F | Afar Region Lower Than  | 0 | 60  | N | Withdrawn   |
| 617140 | F | Amhara Re Lower Than    | 0 | 120 | N | Withdrawn   |
| 617146 | F | Tigrai Regi Lower Than  | 0 | 60  | N | Fail        |
| 617147 | F | Tigrai Regi Lower Than  | 0 | 60  | N | Fail        |
| 617190 | F | Sidamo Re, Lower Than   | 0 | 60  | N | Pass        |
| 617225 | F | North Regi Lower Than   | 0 | 60  | N | Pass        |
| 617287 | F | Sidamo Re, A Level or   | 0 | 60  | Y | Fail        |
| 617296 | F | South Regi Lower Than   | 0 | 60  | N | Fail        |
| 617297 | F | Tigrai Regi Lower Than  | 0 | 60  | N | Withdrawn   |
| 617525 | F | Sidamo Re, A Level or   | 0 | 120 | N | Withdrawn   |
| 617556 | F | North Regi A Level or   | 0 | 60  | N | Withdrawn   |
| 617560 | F | South Wes A Level or    | 0 | 120 | N | Pass        |
| 617576 | F | Tigrai Regi A Level or  | 0 | 60  | N | Pass        |
| 617714 | F | Sidamo Re, Lower Than   | 0 | 60  | N | Withdrawn   |



|        |   |                          |   |     |   |             |
|--------|---|--------------------------|---|-----|---|-------------|
| 617717 | F | Amhara Re A Level or I   | 0 | 60  | N | Fail        |
| 617764 | F | Tigrai Regi Lower Tha    | 0 | 75  | N | Pass        |
| 617792 | F | Sidamo Re A Level or I   | 0 | 60  | N | Pass        |
| 617813 | F | Sidamo Re Lower Tha      | 0 | 60  | N | Pass        |
| 617843 | F | Addis Abat Lower Tha     | 0 | 60  | N | Withdrawn   |
| 617905 | F | Addis Abat A Level or I  | 0 | 60  | N | Withdrawn   |
| 617950 | F | Addis Abat A Level or I  | 0 | 60  | N | Withdrawn   |
| 617959 | F | Sidamo Re HE Qualific    | 0 | 60  | N | Fail        |
| 618054 | F | Sidamo Re Lower Tha      | 0 | 60  | N | Withdrawn   |
| 618108 | F | Afar Regi Lower Tha      | 0 | 60  | N | Withdrawn   |
| 618137 | F | Addis Abat A Level or I  | 0 | 60  | N | Withdrawn   |
| 618145 | F | Oromia Re A Level or I   | 0 | 60  | N | Distinction |
| 618151 | F | Tigrai Regi Lower Tha    | 0 | 60  | Y | Pass        |
| 618197 | F | Oromia Re Lower Tha      | 0 | 60  | N | Withdrawn   |
| 618205 | F | Tigrai Regi Lower Tha    | 0 | 60  | N | Pass        |
| 618258 | F | Afar Regi HE Qualific    | 0 | 60  | N | Pass        |
| 618265 | F | Tigrai Regi A Level or I | 0 | 60  | N | Withdrawn   |
| 618292 | F | Sidamo Re Lower Tha      | 0 | 60  | N | Withdrawn   |
| 618360 | F | Amhara Re A Level or I   | 0 | 120 | N | Withdrawn   |
| 618362 | F | South Regi A Level or I  | 0 | 60  | N | Withdrawn   |
| 618399 | F | Sidamo Re A Level or I   | 0 | 60  | N | Pass        |
| 618534 | F | Somalia Re Lower Tha     | 0 | 120 | N | Fail        |
| 618539 | M | Sidamo Re A Level or I   | 0 | 60  | Y | Fail        |
| 618586 | F | Sidamo Re Lower Tha      | 0 | 60  | N | Withdrawn   |
| 618631 | F | Afar Regi Lower Tha      | 0 | 90  | N | Fail        |
| 618632 | F | Sidamo Re A Level or I   | 0 | 60  | N | Fail        |
| 618670 | F | South Regi A Level or I  | 0 | 60  | N | Pass        |
| 618673 | F | Amhara Re Lower Tha      | 0 | 120 | Y | Fail        |
| 618710 | F | Amhara Re A Level or I   | 0 | 120 | N | Withdrawn   |
| 618784 | F | South Wes Lower Tha      | 0 | 60  | N | Withdrawn   |
| 618816 | F | Sidamo Re Lower Tha      | 0 | 60  | N | Fail        |
| 618858 | F | Sidamo Re Lower Tha      | 0 | 60  | N | Withdrawn   |
| 618869 | F | Amhara Re A Level or I   | 0 | 90  | N | Fail        |
| 618870 | F | South Regi A Level or I  | 0 | 60  | N | Withdrawn   |
| 618882 | F | Amhara Re A Level or I   | 0 | 60  | Y | Pass        |
| 618951 | F | South Wes A Level or I   | 0 | 60  | N | Pass        |
| 618957 | F | Sidamo Re Lower Tha      | 0 | 60  | N | Withdrawn   |
| 618965 | F | South Regi Lower Tha     | 0 | 120 | N | Fail        |
| 618981 | F | Afar Regi Lower Tha      | 0 | 60  | N | Pass        |
| 619054 | F | Afar Regi HE Qualific    | 0 | 120 | N | Withdrawn   |
| 619161 | F | Tigrai Regi Lower Tha    | 0 | 60  | Y | Fail        |
| 619196 | F | Sidamo Re A Level or I   | 0 | 60  | N | Pass        |
| 619207 | F | Addis Abat A Level or I  | 0 | 60  | N | Fail        |
| 619265 | F | South Regi Lower Tha     | 0 | 120 | N | Withdrawn   |
| 619288 | F | South Wes Lower Tha      | 0 | 60  | N | Pass        |
| 619311 | F | Sidamo Re Lower Tha      | 0 | 60  | N | Withdrawn   |
| 619330 | M | Afar Regi A Level or I   | 0 | 60  | N | Withdrawn   |

|        |   |                             |   |     |   |             |
|--------|---|-----------------------------|---|-----|---|-------------|
| 619471 | F | Tigray Region HE Qualific   | 0 | 60  | N | Pass        |
| 619508 | F | Sidamo Region HE Qualific   | 0 | 120 | N | Withdrawn   |
| 619901 | F | Sidamo Region HE Qualific   | 0 | 60  | N | Withdrawn   |
| 619980 | M | Afar Region HE Qualific     | 0 | 120 | N | Fail        |
| 620018 | F | Oromia Region A Level or I  | 0 | 60  | N | Withdrawn   |
| 620047 | F | South West Lower Thar       | 0 | 60  | N | Withdrawn   |
| 620072 | F | Afar Region Lower Thar      | 0 | 60  | N | Fail        |
| 620073 | F | South Region Lower Thar     | 0 | 60  | N | Pass        |
| 620092 | F | Somalia Region A Level or I | 0 | 60  | N | Distinction |
| 620126 | F | Addis Ababa A Level or I    | 0 | 60  | N | Withdrawn   |
| 620128 | F | Addis Ababa A Level or I    | 0 | 60  | N | Pass        |
| 620129 | F | Sidamo Region A Level or I  | 0 | 120 | N | Pass        |
| 620175 | F | Sidamo Region A Level or I  | 0 | 60  | N | Withdrawn   |
| 620220 | F | Sidamo Region Lower Thar    | 0 | 60  | N | Withdrawn   |
| 620230 | F | South West HE Qualific      | 0 | 60  | N | Withdrawn   |
| 620257 | F | Somalia Region Lower Thar   | 0 | 60  | N | Pass        |
| 620283 | F | South West Lower Thar       | 0 | 60  | N | Fail        |
| 620289 | F | Afar Region Lower Thar      | 0 | 60  | N | Withdrawn   |
| 620304 | M | South Region Lower Thar     | 0 | 60  | N | Fail        |
| 620354 | F | South Region Lower Thar     | 0 | 120 | N | Distinction |
| 620389 | F | Sidamo Region A Level or I  | 0 | 120 | N | Withdrawn   |
| 620408 | M | South Region A Level or I   | 0 | 60  | Y | Distinction |
| 620409 | F | Tigray Region Lower Thar    | 0 | 60  | N | Pass        |
| 620427 | F | Sidamo Region A Level or I  | 0 | 60  | N | Distinction |
| 620486 | F | Tigray Region A Level or I  | 0 | 90  | N | Withdrawn   |
| 620507 | F | Oromia Region Lower Thar    | 0 | 60  | N | Withdrawn   |
| 620546 | F | South Region Lower Thar     | 0 | 60  | N | Withdrawn   |
| 620573 | F | North Region A Level or I   | 0 | 60  | N | Pass        |
| 620694 | F | Sidamo Region Lower Thar    | 0 | 60  | N | Pass        |
| 620791 | F | South Region Lower Thar     | 0 | 60  | N | Withdrawn   |
| 620865 | F | Amhara Region Lower Thar    | 0 | 120 | N | Withdrawn   |
| 620889 | F | Oromia Region A Level or I  | 0 | 60  | N | Pass        |
| 620922 | F | Amhara Region Lower Thar    | 0 | 60  | N | Pass        |
| 620923 | F | South West HE Qualific      | 0 | 60  | N | Pass        |
| 620950 | F | Amhara Region Lower Thar    | 0 | 120 | N | Withdrawn   |
| 620980 | F | Afar Region Lower Thar      | 0 | 60  | N | Pass        |
| 621301 | M | Afar Region Lower Thar      | 0 | 60  | N | Pass        |
| 621303 | F | South West A Level or I     | 0 | 60  | Y | Fail        |
| 621322 | M | Somalia Region Lower Thar   | 0 | 60  | Y | Pass        |
| 621323 | M | Afar Region A Level or I    | 0 | 60  | N | Withdrawn   |
| 621369 | F | Somalia Region HE Qualific  | 0 | 60  | N | Fail        |
| 621394 | F | Afar Region HE Qualific     | 0 | 60  | N | Pass        |
| 621508 | F | South West Lower Thar       | 0 | 60  | N | Withdrawn   |
| 621607 | F | Somalia Region Lower Thar   | 0 | 60  | N | Withdrawn   |
| 621703 | F | South Region No Formal      | 0 | 60  | N | Fail        |
| 621731 | F | South Region A Level or I   | 0 | 60  | N | Withdrawn   |
| 621862 | F | South Region A Level or I   | 0 | 60  | N | Pass        |

|        |   |                         |   |     |   |             |
|--------|---|-------------------------|---|-----|---|-------------|
| 621885 | F | Somalia Re Lower Tha    | 0 | 60  | N | Withdrawn   |
| 621890 | F | South Regi A Level or I | 0 | 120 | N | Withdrawn   |
| 621894 | M | Sidamo Re A Level or I  | 0 | 60  | N | Pass        |
| 621905 | F | Addis Abak A Level or I | 0 | 90  | N | Pass        |
| 621937 | F | Sidamo Re A Level or I  | 0 | 60  | N | Fail        |
| 622132 | F | Afar Regio Lower Tha    | 0 | 60  | N | Distinction |
| 622180 | M | South Wes Lower Tha     | 0 | 120 | N | Withdrawn   |
| 622208 | F | North Regi Lower Tha    | 0 | 120 | N | Pass        |
| 622217 | F | Addis Abak A Level or I | 0 | 60  | N | Fail        |
| 622223 | F | Afar Regio HE Qualific  | 0 | 60  | N | Fail        |
| 622330 | F | South Regi A Level or I | 0 | 90  | N | Withdrawn   |
| 622345 | F | Somalia Re A Level or I | 0 | 60  | N | Pass        |
| 622466 | M | South Regi A Level or I | 0 | 60  | N | Pass        |
| 622498 | F | Sidamo Re A Level or I  | 0 | 120 | N | Withdrawn   |
| 622505 | M | Tigrai Regi HE Qualific | 0 | 120 | N | Distinction |
| 622538 | F | Addis Abak Lower Tha    | 0 | 60  | N | Withdrawn   |
| 622604 | F | South Regi A Level or I | 0 | 120 | N | Pass        |
| 622645 | F | Sidamo Re A Level or I  | 0 | 120 | N | Withdrawn   |
| 622715 | M | South Regi A Level or I | 0 | 60  | N | Fail        |
| 622720 | F | Amhara Re Lower Tha     | 0 | 60  | N | Fail        |
| 622766 | M | Tigrai Regi Lower Tha   | 0 | 120 | N | Fail        |
| 622767 | F | South Regi Lower Tha    | 0 | 120 | N | Withdrawn   |
| 622838 | F | Tigrai Regi Lower Tha   | 0 | 60  | N | Fail        |
| 622867 | F | South Regi A Level or I | 0 | 60  | Y | Fail        |
| 622925 | F | Addis Abak Lower Tha    | 0 | 60  | N | Withdrawn   |
| 622927 | F | Amhara Re Lower Tha     | 0 | 60  | N | Fail        |
| 622974 | F | Somalia Re A Level or I | 0 | 60  | N | Pass        |
| 622982 | F | Oromia Re A Level or I  | 0 | 60  | N | Pass        |
| 623001 | F | Sidamo Re A Level or I  | 0 | 60  | N | Withdrawn   |
| 623055 | F | Amhara Re A Level or I  | 0 | 60  | Y | Pass        |
| 623069 | M | Afar Regio Lower Tha    | 0 | 60  | Y | Fail        |
| 623104 | M | South Regi Lower Tha    | 0 | 60  | N | Withdrawn   |
| 623168 | F | Somalia Re HE Qualific  | 0 | 120 | N | Pass        |
| 623169 | F | Somalia Re Lower Tha    | 0 | 120 | N | Pass        |
| 623177 | F | Addis Abak A Level or I | 0 | 60  | N | Fail        |
| 623240 | F | South Wes A Level or I  | 0 | 60  | N | Distinction |
| 623295 | F | Addis Abak A Level or I | 0 | 60  | N | Fail        |
| 623321 | M | South Wes Lower Tha     | 0 | 60  | N | Fail        |
| 623333 | F | Tigrai Regi Lower Tha   | 0 | 60  | N | Pass        |
| 623392 | F | Sidamo Re No Formal     | 0 | 60  | N | Withdrawn   |
| 623406 | F | South Regi Lower Tha    | 0 | 60  | N | Pass        |
| 623548 | F | Amhara Re Lower Tha     | 0 | 120 | N | Withdrawn   |
| 623603 | F | South Regi Lower Tha    | 0 | 120 | N | Fail        |
| 623622 | F | Amhara Re Lower Tha     | 0 | 60  | N | Pass        |
| 623651 | F | Amhara Re A Level or I  | 0 | 120 | N | Withdrawn   |
| 623654 | F | South Regi A Level or I | 0 | 60  | N | Distinction |
| 623660 | F | Afar Regio HE Qualific  | 0 | 60  | N | Pass        |

|        |   |                                  |   |     |   |             |
|--------|---|----------------------------------|---|-----|---|-------------|
| 623821 | F | Tigray Region Lower Than         | 0 | 60  | N | Fail        |
| 623845 | F | South West A Level or Higher     | 0 | 60  | N | Pass        |
| 623857 | F | Tigray Region A Level or Higher  | 0 | 60  | N | Fail        |
| 623882 | F | North Region Lower Than          | 0 | 60  | N | Pass        |
| 623911 | F | Addis Ababa Lower Than           | 0 | 60  | N | Fail        |
| 623914 | F | Sidamo Region A Level or Higher  | 0 | 120 | N | Withdrawn   |
| 623935 | F | South Region A Level or Higher   | 0 | 120 | N | Pass        |
| 624011 | F | South West HE Qualification      | 0 | 120 | N | Pass        |
| 624046 | F | Sidamo Region A Level or Higher  | 0 | 60  | N | Pass        |
| 624069 | F | South Region A Level or Higher   | 0 | 60  | N | Pass        |
| 624196 | F | Afar Region Lower Than           | 0 | 60  | N | Pass        |
| 624202 | F | North Region A Level or Higher   | 0 | 120 | N | Withdrawn   |
| 624298 | F | Sidamo Region Lower Than         | 0 | 60  | N | Withdrawn   |
| 624306 | F | Somalia Region Lower Than        | 0 | 60  | N | Pass        |
| 624341 | F | Afar Region HE Qualification     | 0 | 120 | N | Withdrawn   |
| 624350 | F | Somalia Region Lower Than        | 0 | 60  | N | Withdrawn   |
| 624406 | F | South Region Lower Than          | 0 | 60  | N | Distinction |
| 624411 | M | Somalia Region Lower Than        | 0 | 120 | N | Withdrawn   |
| 624415 | F | Sidamo Region Lower Than         | 0 | 60  | N | Pass        |
| 624427 | F | Sidamo Region Lower Than         | 0 | 120 | Y | Withdrawn   |
| 624514 | F | South West A Level or Higher     | 0 | 60  | N | Withdrawn   |
| 624518 | F | Sidamo Region A Level or Higher  | 0 | 120 | N | Withdrawn   |
| 624544 | F | Amhara Region A Level or Higher  | 0 | 90  | Y | Withdrawn   |
| 624549 | F | Sidamo Region Lower Than         | 0 | 60  | N | Withdrawn   |
| 624567 | F | South West A Level or Higher     | 0 | 60  | N | Fail        |
| 624572 | F | South Region A Level or Higher   | 0 | 180 | N | Withdrawn   |
| 624592 | F | South Region Lower Than          | 0 | 90  | N | Pass        |
| 624598 | F | Afar Region HE Qualification     | 0 | 60  | N | Fail        |
| 624604 | F | Afar Region A Level or Higher    | 0 | 60  | N | Fail        |
| 624653 | F | Addis Ababa A Level or Higher    | 0 | 60  | N | Pass        |
| 624661 | F | South West Lower Than            | 0 | 60  | Y | Pass        |
| 624663 | F | Somalia Region Lower Than        | 0 | 60  | N | Withdrawn   |
| 624673 | F | Amhara Region Lower Than         | 0 | 60  | N | Withdrawn   |
| 624674 | F | Addis Ababa Lower Than           | 0 | 60  | N | Fail        |
| 624677 | F | Sidamo Region A Level or Higher  | 0 | 60  | N | Fail        |
| 624704 | F | Somalia Region Lower Than        | 0 | 60  | N | Fail        |
| 624722 | F | Sidamo Region Lower Than         | 0 | 60  | N | Fail        |
| 624734 | F | Addis Ababa A Level or Higher    | 0 | 60  | N | Withdrawn   |
| 624738 | M | Sidamo Region Lower Than         | 0 | 60  | N | Pass        |
| 624743 | F | Addis Ababa A Level or Higher    | 0 | 60  | N | Withdrawn   |
| 624799 | M | South Region A Level or Higher   | 0 | 60  | Y | Fail        |
| 624847 | F | Amhara Region A Level or Higher  | 0 | 60  | N | Pass        |
| 624879 | F | Amhara Region A Level or Higher  | 0 | 60  | Y | Withdrawn   |
| 624950 | F | Addis Ababa A Level or Higher    | 0 | 120 | N | Withdrawn   |
| 624972 | F | South Region Lower Than          | 0 | 60  | N | Pass        |
| 624997 | F | Somalia Region A Level or Higher | 0 | 60  | N | Pass        |
| 625021 | F | South Region Lower Than          | 0 | 60  | N | Pass        |

|        |   |                          |   |     |   |             |
|--------|---|--------------------------|---|-----|---|-------------|
| 625024 | F | South Regi Lower Tha     | 0 | 60  | N | Pass        |
| 625027 | F | Sidamo Re Lower Tha      | 0 | 60  | N | Fail        |
| 625071 | F | Addis Abak A Level or I  | 0 | 60  | N | Pass        |
| 625087 | F | Afar Regio HE Qualific   | 0 | 60  | N | Fail        |
| 625094 | M | South Regi A Level or I  | 0 | 60  | N | Pass        |
| 625124 | F | Tigrai Regi A Level or I | 0 | 60  | N | Fail        |
| 625167 | F | Tigrai Regi Lower Tha    | 0 | 60  | N | Pass        |
| 625173 | F | Sidamo Re Lower Tha      | 0 | 60  | N | Withdrawn   |
| 625180 | F | South Regi HE Qualific   | 0 | 60  | N | Fail        |
| 625185 | F | Somalia Re A Level or I  | 0 | 60  | N | Pass        |
| 625202 | F | Amhara Re Lower Tha      | 0 | 60  | N | Withdrawn   |
| 625214 | F | Somalia Re Lower Tha     | 0 | 60  | N | Withdrawn   |
| 625249 | F | Addis Abak Lower Tha     | 0 | 60  | N | Pass        |
| 625251 | F | Amhara Re Lower Tha      | 0 | 60  | N | Pass        |
| 625295 | M | Amhara Re A Level or I   | 0 | 60  | N | Fail        |
| 625301 | F | Amhara Re HE Qualific    | 0 | 60  | N | Fail        |
| 625307 | F | Addis Abak Lower Tha     | 0 | 60  | N | Withdrawn   |
| 625383 | F | South Wes Lower Tha      | 0 | 60  | N | Pass        |
| 625390 | F | Oromia Re A Level or I   | 0 | 60  | N | Pass        |
| 625444 | F | Addis Abak A Level or I  | 0 | 60  | N | Pass        |
| 625465 | F | Sidamo Re Lower Tha      | 0 | 120 | N | Withdrawn   |
| 625477 | F | Oromia Re A Level or I   | 0 | 60  | N | Distinction |
| 625478 | F | South Regi Lower Tha     | 0 | 60  | N | Fail        |
| 625493 | F | Oromia Re A Level or I   | 0 | 60  | Y | Withdrawn   |
| 625511 | M | Addis Abak Lower Tha     | 0 | 60  | N | Withdrawn   |
| 625514 | M | Addis Abak HE Qualific   | 0 | 120 | N | Pass        |
| 625578 | F | Somalia Re Lower Tha     | 0 | 60  | N | Withdrawn   |
| 625581 | F | Amhara Re Lower Tha      | 0 | 60  | N | Withdrawn   |
| 625619 | F | South Regi A Level or I  | 0 | 60  | N | Withdrawn   |
| 625713 | F | Oromia Re Lower Tha      | 0 | 120 | N | Fail        |
| 625724 | M | Afar Regio HE Qualific   | 0 | 60  | N | Pass        |
| 625751 | F | Afar Regio Lower Tha     | 0 | 60  | N | Withdrawn   |
| 625768 | F | Somalia Re Lower Tha     | 0 | 120 | N | Fail        |
| 625816 | F | Sidamo Re A Level or I   | 0 | 60  | N | Pass        |
| 625833 | F | Addis Abak No Formal     | 0 | 60  | N | Distinction |
| 625834 | F | Amhara Re Lower Tha      | 0 | 60  | N | Withdrawn   |
| 625853 | F | Addis Abak A Level or I  | 0 | 60  | N | Fail        |
| 625857 | F | Sidamo Re Lower Tha      | 0 | 60  | N | Withdrawn   |
| 625879 | F | Sidamo Re A Level or I   | 0 | 120 | N | Fail        |
| 625919 | F | Sidamo Re A Level or I   | 0 | 60  | N | Distinction |
| 626046 | F | Sidamo Re Lower Tha      | 0 | 60  | N | Distinction |
| 626123 | F | South Wes Lower Tha      | 0 | 60  | Y | Distinction |
| 626126 | F | Sidamo Re A Level or I   | 0 | 60  | N | Pass        |
| 626138 | F | Addis Abak Lower Tha     | 0 | 60  | N | Pass        |
| 626164 | F | South Regi Lower Tha     | 0 | 60  | N | Pass        |
| 626245 | F | Sidamo Re Lower Tha      | 0 | 60  | N | Pass        |
| 626254 | F | Sidamo Re A Level or I   | 0 | 120 | N | Pass        |

|        |   |                          |   |     |   |             |
|--------|---|--------------------------|---|-----|---|-------------|
| 626297 | F | South Regi Lower Tha     | 0 | 60  | N | Fail        |
| 626330 | F | Somalia Re Lower Tha     | 0 | 60  | N | Withdrawn   |
| 626352 | F | South Regi A Level or I  | 0 | 60  | N | Pass        |
| 626365 | F | Tigrai Regi A Level or I | 0 | 60  | N | Pass        |
| 626386 | F | Somalia Re Lower Tha     | 0 | 60  | Y | Withdrawn   |
| 626428 | F | Tigrai Regi Lower Tha    | 0 | 60  | N | Fail        |
| 626442 | F | South Regi Lower Tha     | 0 | 60  | N | Fail        |
| 626460 | F | Afar Regi Lower Tha      | 0 | 60  | N | Withdrawn   |
| 626485 | F | South Regi Lower Tha     | 0 | 60  | N | Withdrawn   |
| 626491 | F | North Regi A Level or I  | 0 | 60  | N | Distinction |
| 626549 | F | Amhara Re Lower Tha      | 0 | 60  | N | Withdrawn   |
| 626555 | M | South Regi Lower Tha     | 0 | 60  | N | Pass        |
| 626597 | F | South Regi A Level or I  | 0 | 60  | N | Withdrawn   |
| 626604 | M | South Regi A Level or I  | 0 | 60  | N | Pass        |
| 626642 | F | Somalia Re A Level or I  | 0 | 60  | N | Pass        |
| 626746 | F | South Regi A Level or I  | 0 | 60  | N | Withdrawn   |
| 626750 | F | Addis Abak Lower Tha     | 0 | 60  | N | Fail        |
| 626773 | F | Afar Regi Lower Tha      | 0 | 60  | N | Withdrawn   |
| 626806 | F | Amhara Re Lower Tha      | 0 | 60  | Y | Withdrawn   |
| 626840 | F | Afar Regi Lower Tha      | 0 | 60  | N | Withdrawn   |
| 626841 | F | Oromia Re A Level or I   | 0 | 60  | N | Distinction |
| 626843 | F | Sidamo Re A Level or I   | 0 | 60  | N | Pass        |
| 626872 | F | Addis Abak A Level or I  | 0 | 60  | N | Withdrawn   |
| 626876 | F | Sidamo Re Lower Tha      | 0 | 60  | N | Withdrawn   |
| 626897 | F | Tigrai Regi A Level or I | 0 | 60  | N | Fail        |
| 626917 | F | North Regi A Level or I  | 0 | 60  | N | Fail        |
| 626928 | F | South Wes A Level or I   | 0 | 60  | N | Pass        |
| 626951 | F | Tigrai Regi A Level or I | 0 | 60  | N | Pass        |
| 626966 | F | Amhara Re Lower Tha      | 0 | 60  | N | Distinction |
| 627000 | F | Amhara Re A Level or I   | 0 | 60  | N | Fail        |
| 627027 | F | South Regi Lower Tha     | 0 | 60  | N | Pass        |
| 627094 | F | Amhara Re No Formal      | 0 | 60  | N | Fail        |
| 627115 | F | Sidamo Re A Level or I   | 0 | 120 | N | Distinction |
| 627118 | F | Sidamo Re A Level or I   | 0 | 120 | N | Pass        |
| 627179 | M | Sidamo Re Lower Tha      | 0 | 60  | N | Fail        |
| 627185 | F | Tigrai Regi Lower Tha    | 0 | 60  | N | Pass        |
| 627190 | F | Afar Regi A Level or I   | 0 | 60  | N | Pass        |
| 627228 | F | Addis Abak Lower Tha     | 0 | 60  | N | Withdrawn   |
| 627244 | F | South Regi A Level or I  | 0 | 60  | N | Pass        |
| 627245 | F | Oromia Re HE Qualific    | 0 | 90  | N | Withdrawn   |
| 627252 | F | Amhara Re Lower Tha      | 0 | 60  | Y | Withdrawn   |
| 627256 | F | Sidamo Re A Level or I   | 0 | 60  | N | Withdrawn   |
| 627270 | F | South Wes A Level or I   | 0 | 60  | N | Distinction |
| 627277 | F | Somalia Re Lower Tha     | 0 | 160 | N | Withdrawn   |
| 627285 | F | Afar Regi A Level or I   | 0 | 60  | N | Pass        |
| 627316 | M | South Regi Lower Tha     | 0 | 60  | Y | Withdrawn   |
| 627321 | F | Sidamo Re HE Qualific    | 0 | 60  | N | Fail        |

|        |   |                          |   |     |   |             |
|--------|---|--------------------------|---|-----|---|-------------|
| 627380 | F | Addis Abat A Level or l  | 0 | 60  | N | Pass        |
| 627388 | F | Oromia Re A Level or l   | 0 | 60  | N | Distinction |
| 627403 | F | South Regi A Level or l  | 0 | 120 | Y | Fail        |
| 627427 | F | Somalia Re Lower Than    | 0 | 60  | N | Withdrawn   |
| 627509 | F | Tigrai Regi A Level or l | 0 | 120 | N | Pass        |
| 627528 | F | Sidamo Re A Level or l   | 0 | 60  | N | Fail        |
| 627549 | F | Oromia Re A Level or l   | 0 | 60  | N | Distinction |
| 627550 | F | Sidamo Re No Formal      | 0 | 60  | N | Pass        |
| 627613 | M | Amhara Re Lower Than     | 0 | 60  | N | Fail        |
| 627647 | F | Oromia Re A Level or l   | 0 | 120 | N | Pass        |
| 627659 | F | Tigrai Regi A Level or l | 0 | 60  | N | Pass        |
| 627670 | F | Sidamo Re Lower Than     | 0 | 120 | N | Withdrawn   |
| 627680 | F | Addis Abak Lower Than    | 0 | 60  | Y | Withdrawn   |
| 627685 | F | Sidamo Re A Level or l   | 0 | 60  | N | Pass        |
| 627748 | F | Amhara Re A Level or l   | 0 | 60  | N | Withdrawn   |
| 627777 | F | Sidamo Re Lower Than     | 0 | 60  | N | Pass        |
| 627948 | F | Sidamo Re A Level or l   | 0 | 60  | N | Fail        |
| 628006 | F | North Regi A Level or l  | 0 | 60  | N | Pass        |
| 628119 | F | South Wes A Level or l   | 0 | 60  | N | Fail        |
| 628142 | F | Somalia Re A Level or l  | 0 | 60  | N | Withdrawn   |
| 628176 | F | Afar Regio HE Qualific   | 0 | 60  | N | Pass        |
| 628178 | F | Afar Regio HE Qualific   | 0 | 60  | N | Distinction |
| 628180 | F | Afar Regio A Level or l  | 0 | 60  | N | Pass        |
| 628181 | F | Somalia Re A Level or l  | 0 | 60  | N | Pass        |
| 628183 | F | Afar Regio A Level or l  | 0 | 60  | N | Fail        |
| 628190 | F | Afar Regio Lower Than    | 0 | 60  | N | Pass        |
| 628287 | F | Somalia Re A Level or l  | 0 | 60  | N | Fail        |
| 628301 | F | Sidamo Re Lower Than     | 0 | 60  | N | Distinction |
| 628327 | F | Addis Abak A Level or l  | 0 | 60  | N | Withdrawn   |
| 628328 | F | Tigrai Regi Lower Than   | 0 | 60  | N | Pass        |
| 628329 | M | Sidamo Re A Level or l   | 0 | 60  | N | Fail        |
| 628341 | F | South Regi A Level or l  | 0 | 120 | N | Withdrawn   |
| 628360 | F | South Wes Lower Than     | 0 | 60  | N | Withdrawn   |
| 628379 | F | South Regi Lower Than    | 0 | 60  | N | Fail        |
| 628389 | F | Addis Abak HE Qualific   | 0 | 60  | N | Distinction |
| 628392 | F | Sidamo Re Lower Than     | 0 | 60  | N | Withdrawn   |
| 628402 | F | Oromia Re A Level or l   | 0 | 60  | N | Withdrawn   |
| 628411 | F | South Regi HE Qualific   | 0 | 120 | N | Fail        |
| 628423 | F | Tigrai Regi A Level or l | 0 | 60  | N | Distinction |
| 628442 | F | Somalia Re Lower Than    | 0 | 60  | N | Withdrawn   |
| 628511 | F | Amhara Re A Level or l   | 0 | 60  | N | Fail        |
| 628516 | M | Afar Regio Lower Than    | 0 | 60  | N | Distinction |
| 628525 | F | Sidamo Re Lower Than     | 0 | 60  | N | Fail        |
| 628580 | F | Amhara Re HE Qualific    | 0 | 120 | Y | Distinction |
| 628586 | F | Sidamo Re No Formal      | 0 | 120 | N | Fail        |
| 628616 | F | Somalia Re A Level or l  | 0 | 60  | N | Distinction |
| 628635 | F | Afar Regio Lower Than    | 0 | 60  | N | Pass        |

|        |   |                          |   |     |   |             |
|--------|---|--------------------------|---|-----|---|-------------|
| 628655 | F | South Regi A Level or I  | 0 | 60  | N | Fail        |
| 628751 | F | South Regi A Level or I  | 0 | 60  | N | Pass        |
| 628762 | F | South Regi HE Qualific   | 0 | 60  | N | Withdrawn   |
| 628765 | F | Somalia Re Lower Than    | 0 | 60  | N | Withdrawn   |
| 628827 | F | Amhara Re A Level or I   | 0 | 60  | Y | Fail        |
| 628843 | F | South Regi No Formal     | 0 | 60  | N | Withdrawn   |
| 628903 | F | Somalia Re Lower Than    | 0 | 120 | N | Fail        |
| 628941 | M | Afar Region Lower Than   | 0 | 60  | N | Pass        |
| 628954 | F | South Regi Lower Than    | 0 | 60  | N | Pass        |
| 628970 | F | Sidamo Re Lower Than     | 0 | 60  | N | Withdrawn   |
| 628982 | F | Tigrai Regi HE Qualific  | 0 | 60  | N | Fail        |
| 629026 | F | Afar Region HE Qualific  | 0 | 60  | N | Pass        |
| 629029 | M | South Regi Lower Than    | 0 | 150 | N | Withdrawn   |
| 629037 | F | Afar Region HE Qualific  | 0 | 60  | N | Pass        |
| 629040 | F | South Regi A Level or I  | 0 | 60  | N | Withdrawn   |
| 629044 | F | Sidamo Re A Level or I   | 0 | 60  | N | Fail        |
| 629060 | F | Addis Abak A Level or I  | 0 | 60  | N | Pass        |
| 629088 | M | Somalia Re A Level or I  | 0 | 60  | N | Withdrawn   |
| 629094 | F | Sidamo Re Lower Than     | 0 | 60  | N | Fail        |
| 629103 | F | Addis Abak A Level or I  | 0 | 60  | N | Fail        |
| 629159 | F | Afar Region Lower Than   | 0 | 60  | N | Fail        |
| 629240 | F | South Regi Lower Than    | 0 | 60  | N | Pass        |
| 629274 | F | Oromia Re A Level or I   | 0 | 60  | N | Pass        |
| 629340 | F | Afar Region HE Qualific  | 0 | 60  | N | Withdrawn   |
| 629424 | F | Tigrai Regi Lower Than   | 0 | 60  | N | Withdrawn   |
| 629461 | F | Afar Region A Level or I | 0 | 60  | N | Fail        |
| 629462 | F | Oromia Re Lower Than     | 0 | 60  | N | Withdrawn   |
| 629484 | M | Sidamo Re A Level or I   | 0 | 60  | N | Withdrawn   |
| 629490 | F | Afar Region Lower Than   | 0 | 60  | N | Fail        |
| 629504 | M | Tigrai Regi Lower Than   | 0 | 60  | N | Pass        |
| 629505 | M | Tigrai Regi HE Qualific  | 0 | 60  | N | Withdrawn   |
| 629507 | F | Tigrai Regi A Level or I | 0 | 60  | N | Pass        |
| 629538 | F | South Regi A Level or I  | 0 | 60  | Y | Withdrawn   |
| 629554 | F | Sidamo Re A Level or I   | 0 | 60  | N | Fail        |
| 629574 | M | Amhara Re HE Qualific    | 0 | 60  | N | Withdrawn   |
| 629619 | F | South Regi A Level or I  | 0 | 60  | N | Pass        |
| 629671 | F | Sidamo Re HE Qualific    | 0 | 60  | N | Withdrawn   |
| 629736 | M | Amhara Re A Level or I   | 0 | 90  | N | Withdrawn   |
| 629835 | M | Tigrai Regi Lower Than   | 0 | 60  | N | Pass        |
| 629870 | F | Addis Abak A Level or I  | 0 | 60  | N | Fail        |
| 629886 | F | Afar Region Lower Than   | 0 | 60  | N | Pass        |
| 629891 | F | South Wes A Level or I   | 0 | 60  | N | Distinction |
| 629923 | F | Addis Abak Lower Than    | 0 | 60  | N | Fail        |
| 629971 | F | Somalia Re A Level or I  | 0 | 120 | N | Withdrawn   |
| 629976 | F | Afar Region HE Qualific  | 0 | 60  | N | Withdrawn   |
| 629983 | F | Oromia Re A Level or I   | 0 | 60  | N | Withdrawn   |
| 629991 | F | Addis Abak Lower Than    | 0 | 60  | N | Withdrawn   |



|        |   |             |              |   |     |   |             |
|--------|---|-------------|--------------|---|-----|---|-------------|
| 630028 | F | Sidamo Re   | A Level or l | 0 | 120 | N | Pass        |
| 630029 | M | Sidamo Re   | HE Qualific  | 0 | 120 | N | Pass        |
| 630030 | F | South Regi  | Lower Thar   | 0 | 120 | N | Pass        |
| 630037 | F | Oromia Re   | Lower Thar   | 0 | 120 | N | Withdrawn   |
| 630052 | F | South Regi  | Lower Thar   | 0 | 60  | N | Distinction |
| 630053 | F | Somalia Re  | Lower Thar   | 0 | 60  | N | Pass        |
| 630090 | F | Tigrai Regi | Lower Thar   | 0 | 60  | Y | Fail        |
| 630134 | F | Addis Abat  | Lower Thar   | 0 | 60  | N | Withdrawn   |
| 630147 | F | Afar Regioi | Lower Thar   | 0 | 60  | N | Fail        |
| 630182 | M | South Regi  | Lower Thar   | 0 | 60  | N | Withdrawn   |
| 630260 | M | Oromia Re   | Lower Thar   | 0 | 60  | N | Fail        |
| 630315 | F | Tigrai Regi | No Formal    | 0 | 60  | N | Pass        |
| 630333 | F | Addis Abat  | A Level or l | 0 | 60  | N | Pass        |
| 630340 | F | Somalia Re  | Lower Thar   | 0 | 60  | N | Withdrawn   |
| 630345 | F | South Wes   | Lower Thar   | 0 | 60  | Y | Fail        |
| 630372 | F | Afar Regioi | A Level or l | 0 | 60  | N | Pass        |
| 630393 | F | Afar Regioi | HE Qualific  | 0 | 60  | N | Distinction |
| 630415 | F | Addis Abat  | Lower Thar   | 0 | 60  | N | Pass        |
| 630443 | F | South Regi  | A Level or l | 0 | 120 | Y | Pass        |
| 630451 | F | Somalia Re  | A Level or l | 0 | 60  | N | Distinction |
| 630476 | F | Amhara Re   | Lower Thar   | 0 | 60  | Y | Withdrawn   |
| 630497 | F | Somalia Re  | A Level or l | 0 | 60  | N | Fail        |
| 630549 | F | South Regi  | A Level or l | 0 | 60  | N | Fail        |
| 630561 | F | South Wes   | A Level or l | 0 | 60  | N | Pass        |
| 630586 | F | South Regi  | A Level or l | 0 | 60  | Y | Fail        |
| 630608 | F | South Regi  | A Level or l | 0 | 120 | N | Pass        |
| 630718 | F | South Regi  | Lower Thar   | 0 | 60  | N | Pass        |
| 630736 | F | South Regi  | Lower Thar   | 0 | 60  | N | Pass        |
| 630763 | F | Oromia Re   | Lower Thar   | 0 | 60  | N | Pass        |
| 630778 | F | Tigrai Regi | A Level or l | 0 | 60  | N | Pass        |
| 630794 | F | Afar Regioi | Lower Thar   | 0 | 60  | N | Fail        |
| 630823 | F | Afar Regioi | A Level or l | 0 | 60  | N | Pass        |
| 630833 | F | South Regi  | Lower Thar   | 0 | 60  | N | Fail        |
| 630876 | F | Afar Regioi | Lower Thar   | 0 | 60  | N | Pass        |
| 630902 | F | South Regi  | Lower Thar   | 0 | 60  | N | Withdrawn   |
| 630920 | F | Afar Regioi | Lower Thar   | 0 | 60  | N | Withdrawn   |
| 630944 | F | South Regi  | A Level or l | 0 | 60  | N | Pass        |
| 630957 | F | Amhara Re   | Lower Thar   | 0 | 60  | N | Withdrawn   |
| 630999 | F | South Wes   | A Level or l | 0 | 120 | N | Withdrawn   |
| 631031 | F | Afar Regioi | HE Qualific  | 0 | 60  | N | Withdrawn   |
| 631081 | F | South Regi  | A Level or l | 0 | 60  | N | Pass        |
| 631082 | F | Amhara Re   | A Level or l | 0 | 60  | N | Withdrawn   |
| 631086 | F | Somalia Re  | A Level or l | 0 | 120 | N | Fail        |
| 631108 | F | Oromia Re   | Lower Thar   | 0 | 60  | N | Pass        |
| 631109 | F | Addis Abat  | No Formal    | 0 | 60  | N | Pass        |
| 631132 | F | Somalia Re  | Lower Thar   | 0 | 60  | Y | Fail        |
| 631190 | M | Amhara Re   | Lower Thar   | 0 | 120 | Y | Withdrawn   |

|        |   |                          |   |     |   |             |
|--------|---|--------------------------|---|-----|---|-------------|
| 631197 | F | Amhara Re A Level or I   | 0 | 60  | Y | Withdrawn   |
| 631225 | M | Oromia Re A Level or I   | 0 | 60  | N | Pass        |
| 631341 | F | South Regi A Level or I  | 0 | 60  | N | Fail        |
| 631354 | F | South Wes A Level or I   | 0 | 120 | N | Withdrawn   |
| 631384 | F | Somalia Re No Formal     | 0 | 60  | N | Pass        |
| 631422 | F | Afar Regio Lower Than    | 0 | 60  | N | Withdrawn   |
| 631441 | F | Amhara Re Lower Than     | 0 | 60  | N | Distinction |
| 631442 | M | South Regi Lower Than    | 0 | 60  | Y | Fail        |
| 631444 | F | Tigrai Regi A Level or I | 0 | 60  | N | Withdrawn   |
| 631445 | F | Tigrai Regi Lower Than   | 0 | 60  | N | Pass        |
| 631492 | F | Oromia Re HE Qualific    | 0 | 120 | N | Pass        |
| 631515 | F | South Regi A Level or I  | 0 | 60  | N | Pass        |
| 631518 | F | Addis Abak Lower Than    | 0 | 60  | N | Withdrawn   |
| 631530 | F | Somalia Re Lower Than    | 0 | 60  | N | Pass        |
| 631561 | F | South Regi A Level or I  | 0 | 60  | Y | Withdrawn   |
| 631563 | F | Somalia Re A Level or I  | 0 | 120 | Y | Fail        |
| 631610 | F | Somalia Re A Level or I  | 0 | 60  | N | Withdrawn   |
| 631613 | F | Sidamo Re Lower Than     | 0 | 60  | N | Pass        |
| 631650 | M | Oromia Re A Level or I   | 0 | 60  | N | Fail        |
| 631679 | F | Tigrai Regi HE Qualific  | 0 | 120 | N | Distinction |
| 631724 | F | South Regi A Level or I  | 0 | 60  | N | Pass        |
| 631766 | F | Afar Regio A Level or I  | 0 | 60  | N | Pass        |
| 631777 | F | South Wes Lower Than     | 0 | 60  | N | Distinction |
| 631848 | F | South Regi A Level or I  | 0 | 60  | N | Pass        |
| 631941 | F | Sidamo Re Lower Than     | 0 | 60  | N | Withdrawn   |
| 632040 | F | South Regi Lower Than    | 0 | 120 | N | Fail        |
| 632084 | F | South Regi A Level or I  | 0 | 60  | N | Distinction |
| 632113 | F | Amhara Re Lower Than     | 0 | 60  | N | Fail        |
| 632148 | F | South Regi A Level or I  | 0 | 60  | Y | Fail        |
| 632181 | F | Addis Abak A Level or I  | 0 | 60  | N | Withdrawn   |
| 632231 | F | Sidamo Re Lower Than     | 0 | 60  | N | Fail        |
| 632254 | F | Oromia Re A Level or I   | 0 | 60  | N | Pass        |
| 632302 | F | Sidamo Re A Level or I   | 0 | 60  | Y | Pass        |
| 632447 | F | Addis Abak Lower Than    | 0 | 60  | N | Withdrawn   |
| 632454 | F | Amhara Re A Level or I   | 0 | 60  | N | Pass        |
| 632470 | F | South Regi Lower Than    | 0 | 60  | N | Fail        |
| 632503 | F | Oromia Re Lower Than     | 0 | 60  | N | Distinction |
| 632536 | F | Sidamo Re A Level or I   | 0 | 120 | N | Fail        |
| 632547 | F | Addis Abak A Level or I  | 0 | 120 | N | Fail        |
| 632574 | F | Somalia Re Lower Than    | 0 | 60  | N | Withdrawn   |
| 632578 | M | Tigrai Regi Lower Than   | 0 | 60  | N | Pass        |
| 632605 | F | South Regi A Level or I  | 0 | 120 | N | Withdrawn   |
| 632618 | F | Somalia Re A Level or I  | 0 | 120 | N | Withdrawn   |
| 632658 | F | Sidamo Re Lower Than     | 0 | 60  | N | Pass        |
| 632682 | F | Amhara Re Lower Than     | 0 | 60  | N | Fail        |
| 632704 | F | Somalia Re A Level or I  | 0 | 120 | N | Pass        |
| 632712 | F | Sidamo Re A Level or I   | 0 | 60  | N | Fail        |

|        |   |                          |   |     |   |             |
|--------|---|--------------------------|---|-----|---|-------------|
| 632752 | F | Addis Abak A Level or I  | 0 | 60  | N | Pass        |
| 632823 | F | Addis Abak A Level or I  | 0 | 60  | N | Pass        |
| 632847 | F | Addis Abak Lower Than    | 0 | 60  | N | Withdrawn   |
| 632869 | F | Oromia Re A Level or I   | 0 | 60  | N | Fail        |
| 632911 | F | Oromia Re A Level or I   | 0 | 60  | N | Withdrawn   |
| 633024 | F | Sidamo Re A Level or I   | 0 | 60  | N | Pass        |
| 633052 | F | South Wes Lower Than     | 0 | 60  | N | Withdrawn   |
| 633130 | M | South Wes Lower Than     | 0 | 60  | N | Pass        |
| 633162 | F | South Wes A Level or I   | 0 | 60  | N | Fail        |
| 633193 | F | Somalia Re Lower Than    | 0 | 60  | N | Pass        |
| 633208 | M | Addis Abak Lower Than    | 0 | 60  | N | Pass        |
| 633212 | F | Tigrai Regi Lower Than   | 0 | 60  | N | Pass        |
| 633228 | F | South Regi A Level or I  | 0 | 60  | N | Fail        |
| 633231 | F | North Regi Lower Than    | 0 | 60  | N | Fail        |
| 633245 | F | Amhara Re Lower Than     | 0 | 60  | N | Fail        |
| 633257 | M | South Wes Lower Than     | 0 | 60  | N | Fail        |
| 633378 | F | Amhara Re A Level or I   | 0 | 60  | N | Withdrawn   |
| 633380 | M | South Regi Lower Than    | 0 | 120 | N | Fail        |
| 633386 | F | Afar Regi Lower Than     | 0 | 120 | N | Pass        |
| 633394 | F | Amhara Re A Level or I   | 0 | 60  | N | Fail        |
| 633462 | F | Oromia Re Lower Than     | 0 | 180 | N | Withdrawn   |
| 633472 | M | Tigrai Regi A Level or I | 0 | 60  | N | Pass        |
| 633491 | F | Afar Regi HE Qualific    | 0 | 60  | N | Fail        |
| 633499 | F | South Regi HE Qualific   | 0 | 60  | N | Pass        |
| 633560 | F | South Wes A Level or I   | 0 | 60  | N | Distinction |
| 633570 | M | Oromia Re A Level or I   | 0 | 60  | N | Pass        |
| 633590 | F | Addis Abak A Level or I  | 0 | 60  | N | Distinction |
| 633599 | F | South Regi Lower Than    | 0 | 60  | N | Withdrawn   |
| 633603 | F | Sidamo Re Lower Than     | 0 | 60  | N | Fail        |
| 633613 | F | Addis Abak Lower Than    | 0 | 60  | N | Withdrawn   |
| 633646 | F | South Regi A Level or I  | 0 | 60  | N | Pass        |
| 633650 | F | South Wes A Level or I   | 0 | 60  | Y | Pass        |
| 633669 | F | Somalia Re A Level or I  | 0 | 60  | N | Pass        |
| 633865 | F | Sidamo Re HE Qualific    | 0 | 60  | N | Fail        |
| 633883 | M | South Regi A Level or I  | 0 | 60  | N | Withdrawn   |
| 633890 | F | Addis Abak Lower Than    | 0 | 60  | N | Fail        |
| 633900 | F | South Regi Lower Than    | 0 | 60  | N | Withdrawn   |
| 633912 | F | Somalia Re Lower Than    | 0 | 60  | N | Withdrawn   |
| 633929 | F | South Regi Lower Than    | 0 | 60  | N | Pass        |
| 633935 | F | South Wes Lower Than     | 0 | 60  | N | Pass        |
| 634058 | F | South Regi HE Qualific   | 0 | 120 | N | Pass        |
| 634075 | F | South Regi A Level or I  | 0 | 120 | N | Distinction |
| 634077 | F | South Regi A Level or I  | 0 | 60  | N | Pass        |
| 634164 | F | Somalia Re A Level or I  | 0 | 60  | N | Withdrawn   |
| 634188 | F | Addis Abak No Formal     | 0 | 60  | N | Pass        |
| 634230 | F | Addis Abak A Level or I  | 0 | 60  | N | Distinction |
| 634265 | F | Oromia Re A Level or I   | 0 | 60  | N | Pass        |

|        |   |                          |   |     |   |             |
|--------|---|--------------------------|---|-----|---|-------------|
| 634280 | M | South Regi HE Qualific   | 0 | 120 | N | Distinction |
| 634286 | F | Sidamo Re HE Qualific    | 0 | 60  | N | Pass        |
| 634298 | M | Sidamo Re Lower Than     | 0 | 60  | Y | Withdrawn   |
| 634304 | F | Sidamo Re A Level or I   | 0 | 60  | N | Pass        |
| 634353 | F | South Regi A Level or I  | 0 | 60  | N | Fail        |
| 634373 | F | Afar Regi Lower Than     | 0 | 60  | N | Withdrawn   |
| 634396 | F | North Regi A Level or I  | 0 | 60  | N | Withdrawn   |
| 634412 | F | Amhara Re A Level or I   | 0 | 120 | N | Pass        |
| 634428 | M | Oromia Re Lower Than     | 0 | 60  | N | Withdrawn   |
| 634472 | F | Somalia Re A Level or I  | 0 | 120 | N | Distinction |
| 634477 | F | Addis Abak A Level or I  | 0 | 60  | N | Pass        |
| 634481 | M | Addis Abak A Level or I  | 0 | 60  | N | Pass        |
| 634483 | F | Addis Abak Lower Than    | 0 | 60  | N | Pass        |
| 634486 | F | Addis Abak HE Qualific   | 0 | 60  | N | Withdrawn   |
| 634491 | F | Addis Abak A Level or I  | 0 | 60  | N | Pass        |
| 634606 | F | Amhara Re Lower Than     | 0 | 60  | N | Fail        |
| 634615 | M | Sidamo Re A Level or I   | 0 | 60  | N | Fail        |
| 634715 | F | Tigrai Regi HE Qualific  | 0 | 60  | N | Distinction |
| 634833 | F | South Wes Lower Than     | 0 | 60  | N | Distinction |
| 634851 | F | South Regi A Level or I  | 0 | 60  | N | Distinction |
| 634876 | F | Tigrai Regi Lower Than   | 0 | 60  | N | Pass        |
| 634928 | F | Tigrai Regi HE Qualific  | 0 | 60  | N | Pass        |
| 634932 | F | Tigrai Regi Lower Than   | 0 | 60  | N | Fail        |
| 634944 | F | North Regi HE Qualific   | 0 | 60  | N | Pass        |
| 634976 | M | South Regi HE Qualific   | 0 | 60  | N | Distinction |
| 635011 | M | Tigrai Regi A Level or I | 0 | 60  | N | Pass        |
| 635113 | F | South Regi Lower Than    | 0 | 60  | N | Pass        |
| 635122 | F | Oromia Re A Level or I   | 0 | 60  | N | Pass        |
| 635136 | F | Somalia Re HE Qualific   | 0 | 120 | N | Pass        |
| 635173 | F | Tigrai Regi HE Qualific  | 0 | 120 | N | Distinction |
| 635228 | F | Tigrai Regi A Level or I | 0 | 60  | N | Pass        |
| 635230 | F | Tigrai Regi A Level or I | 0 | 60  | N | Distinction |
| 635241 | F | Tigrai Regi A Level or I | 0 | 60  | N | Pass        |
| 635244 | M | Tigrai Regi A Level or I | 0 | 60  | N | Pass        |
| 635245 | M | Tigrai Regi A Level or I | 0 | 60  | N | Fail        |
| 635246 | F | Tigrai Regi Lower Than   | 0 | 60  | N | Fail        |
| 635247 | M | Tigrai Regi HE Qualific  | 0 | 60  | N | Pass        |
| 635432 | M | Tigrai Regi A Level or I | 0 | 60  | N | Fail        |
| 635433 | F | Tigrai Regi A Level or I | 0 | 60  | N | Pass        |
| 635435 | F | Tigrai Regi A Level or I | 0 | 60  | N | Pass        |
| 635473 | M | Amhara Re HE Qualific    | 0 | 120 | N | Fail        |
| 635591 | F | Afar Regi A Level or I   | 0 | 60  | N | Pass        |
| 635755 | F | Tigrai Regi A Level or I | 0 | 60  | Y | Distinction |
| 635761 | F | Tigrai Regi Lower Than   | 0 | 60  | N | Pass        |
| 635764 | M | Tigrai Regi No Formal    | 0 | 60  | N | Pass        |
| 635771 | F | North Regi A Level or I  | 0 | 60  | N | Pass        |
| 635773 | F | Tigrai Regi A Level or I | 0 | 60  | N | Pass        |

|         |   |             |             |   |     |   |             |
|---------|---|-------------|-------------|---|-----|---|-------------|
| 635774  | F | Tigrai Regi | A Level or  | 0 | 60  | N | Pass        |
| 635777  | F | Tigrai Regi | A Level or  | 0 | 60  | N | Withdrawn   |
| 635788  | F | Tigrai Regi | A Level or  | 0 | 60  | N | Pass        |
| 635793  | F | Tigrai Regi | Lower Than  | 0 | 60  | Y | Withdrawn   |
| 636271  | M | Tigrai Regi | HE Qualific | 0 | 60  | N | Fail        |
| 637864  | F | Tigrai Regi | HE Qualific | 0 | 60  | N | Fail        |
| 1108120 | F | Somalia Re  | A Level or  | 0 | 60  | N | Withdrawn   |
| 1127413 | F | Afar Regio  | HE Qualific | 0 | 120 | N | Distinction |
| 1332999 | F | Tigrai Regi | Lower Than  | 0 | 60  | N | Distinction |
| 1341507 | F | Afar Regio  | HE Qualific | 0 | 60  | Y | Distinction |
| 1393589 | F | South Regi  | A Level or  | 0 | 60  | N | Pass        |
| 1406920 | F | Addis Abat  | A Level or  | 0 | 60  | N | Pass        |
| 1431750 | M | South Regi  | A Level or  | 2 | 60  | N | Fail        |
| 1453691 | F | Oromia Re   | A Level or  | 0 | 60  | N | Withdrawn   |
| 1502193 | F | Somalia Re  | A Level or  | 0 | 60  | N | Pass        |
| 1508708 | M | Oromia Re   | A Level or  | 0 | 90  | Y | Fail        |
| 1525567 | M | Afar Regio  | A Level or  | 0 | 60  | N | Distinction |
| 1536591 | F | Sidamo Re   | Lower Than  | 1 | 120 | N | Withdrawn   |
| 1540042 | F | South Regi  | Lower Than  | 0 | 60  | N | Distinction |
| 1559428 | F | Afar Regio  | HE Qualific | 0 | 60  | N | Fail        |
| 1560989 | F | Afar Regio  | HE Qualific | 0 | 60  | Y | Withdrawn   |
| 1588208 | F | Amhara Re   | Lower Than  | 1 | 120 | N | Withdrawn   |
| 1611973 | F | South Wes   | A Level or  | 0 | 60  | N | Fail        |
| 1624443 | F | South Regi  | Lower Than  | 1 | 60  | N | Pass        |
| 1625718 | F | South Wes   | A Level or  | 0 | 60  | N | Distinction |
| 1626021 | F | Sidamo Re   | Lower Than  | 0 | 60  | N | Pass        |
| 1633695 | F | Oromia Re   | Lower Than  | 0 | 60  | N | Fail        |
| 1719114 | F | Sidamo Re   | Lower Than  | 0 | 60  | N | Pass        |
| 1730702 | F | Amhara Re   | Lower Than  | 2 | 120 | N | Fail        |
| 1732219 | F | Afar Regio  | Lower Than  | 0 | 60  | Y | Pass        |
| 1759851 | F | Somalia Re  | Lower Than  | 1 | 120 | N | Pass        |
| 1763653 | F | Sidamo Re   | A Level or  | 1 | 120 | N | Pass        |
| 1780949 | F | Oromia Re   | A Level or  | 1 | 120 | N | Pass        |
| 1782665 | F | South Regi  | HE Qualific | 0 | 60  | N | Fail        |
| 1786380 | F | Oromia Re   | A Level or  | 0 | 60  | N | Pass        |
| 1829654 | F | Sidamo Re   | A Level or  | 0 | 60  | Y | Fail        |
| 1840034 | F | Somalia Re  | Lower Than  | 0 | 60  | Y | Pass        |
| 1863244 | F | Amhara Re   | A Level or  | 0 | 120 | Y | Fail        |
| 1864697 | F | Somalia Re  | A Level or  | 0 | 60  | N | Distinction |
| 1866742 | F | South Wes   | Lower Than  | 1 | 120 | N | Distinction |
| 1877634 | F | Tigrai Regi | HE Qualific | 0 | 60  | N | Distinction |
| 1932474 | F | North Regi  | HE Qualific | 0 | 60  | N | Distinction |
| 1933555 | F | South Wes   | HE Qualific | 2 | 60  | N | Withdrawn   |
| 1934118 | F | South Wes   | Lower Than  | 0 | 120 | N | Fail        |
| 1955634 | F | Addis Abat  | HE Qualific | 0 | 60  | N | Pass        |
| 1957682 | F | Oromia Re   | HE Qualific | 0 | 60  | N | Distinction |
| 1967937 | M | Oromia Re   | HE Qualific | 0 | 60  | N | Fail        |

|         |   |                          |   |     |   |             |
|---------|---|--------------------------|---|-----|---|-------------|
| 1969081 | F | South Regi Lower Tha     | 0 | 60  | N | Withdrawn   |
| 2002415 | F | Sidamo Re A Level or l   | 0 | 120 | N | Pass        |
| 2006364 | F | Afar Regio Lower Tha     | 1 | 60  | N | Fail        |
| 2022801 | M | South Regi A Level or l  | 1 | 120 | N | Distinction |
| 2034455 | F | Somalia Re A Level or l  | 0 | 60  | N | Withdrawn   |
| 2052966 | M | Oromia Re Lower Tha      | 2 | 120 | N | Withdrawn   |
| 2080885 | F | Tigrai Regi A Level or l | 0 | 60  | N | Pass        |
| 2081955 | F | Tigrai Regi HE Qualific  | 1 | 60  | N | Pass        |
| 2082318 | F | Oromia Re A Level or l   | 2 | 120 | N | Pass        |
| 2087747 | F | Afar Regio Lower Tha     | 0 | 60  | Y | Pass        |
| 2094350 | F | Afar Regio Lower Tha     | 0 | 60  | N | Fail        |
| 2104426 | F | Tigrai Regi Lower Tha    | 0 | 60  | N | Pass        |
| 2108614 | F | Tigrai Regi A Level or l | 0 | 60  | N | Distinction |
| 2133207 | F | South Regi Lower Tha     | 0 | 120 | Y | Pass        |
| 2148859 | F | Addis Abak Lower Tha     | 0 | 60  | N | Pass        |
| 2153200 | F | South Regi A Level or l  | 0 | 60  | N | Fail        |
| 2164251 | F | South Regi HE Qualific   | 0 | 60  | N | Distinction |
| 2181205 | F | Sidamo Re Lower Tha      | 0 | 120 | N | Pass        |
| 2184026 | F | Sidamo Re Lower Tha      | 5 | 60  | Y | Withdrawn   |
| 2213424 | F | Afar Regio HE Qualific   | 0 | 60  | N | Distinction |
| 2221869 | F | Tigrai Regi HE Qualific  | 0 | 150 | N | Fail        |
| 2230457 | F | South Regi Lower Tha     | 0 | 60  | Y | Withdrawn   |
| 2243703 | F | South Wes Lower Tha      | 0 | 60  | N | Pass        |
| 2246708 | F | Oromia Re A Level or l   | 0 | 60  | Y | Withdrawn   |
| 2248122 | F | Tigrai Regi A Level or l | 0 | 60  | N | Pass        |
| 2266377 | F | Somalia Re Lower Tha     | 0 | 60  | N | Fail        |
| 2271743 | F | Tigrai Regi A Level or l | 2 | 180 | Y | Fail        |
| 2273828 | F | Amhara Re A Level or l   | 1 | 60  | N | Withdrawn   |
| 2277941 | F | Amhara Re Lower Tha      | 0 | 60  | N | Withdrawn   |
| 2291760 | F | Sidamo Re A Level or l   | 0 | 60  | N | Pass        |
| 2300911 | F | South Wes Lower Tha      | 2 | 180 | N | Withdrawn   |
| 2300913 | F | Afar Regio A Level or l  | 0 | 300 | Y | Fail        |
| 2303083 | F | Oromia Re A Level or l   | 0 | 120 | N | Fail        |
| 2308026 | F | Tigrai Regi No Formal    | 0 | 60  | N | Pass        |
| 2308564 | F | South Wes A Level or l   | 0 | 60  | N | Pass        |
| 2315082 | F | South Wes Lower Tha      | 0 | 60  | N | Withdrawn   |
| 2317273 | F | Tigrai Regi HE Qualific  | 0 | 60  | N | Pass        |
| 2334930 | F | South Regi A Level or l  | 0 | 120 | N | Pass        |
| 2340165 | F | Amhara Re A Level or l   | 0 | 60  | N | Distinction |
| 2343413 | F | Sidamo Re A Level or l   | 1 | 120 | N | Pass        |
| 2351235 | F | South Wes A Level or l   | 0 | 60  | N | Withdrawn   |
| 2353787 | M | Somalia Re Lower Tha     | 1 | 60  | N | Withdrawn   |
| 2363561 | F | Addis Abak Lower Tha     | 1 | 90  | N | Withdrawn   |
| 2372088 | F | Sidamo Re Lower Tha      | 0 | 60  | N | Withdrawn   |
| 2392789 | F | Amhara Re A Level or l   | 0 | 60  | Y | Pass        |
| 2409808 | F | South Regi Lower Tha     | 4 | 120 | N | Withdrawn   |
| 2410331 | F | South Regi Lower Tha     | 2 | 60  | Y | Withdrawn   |

|         |   |                          |   |     |   |             |
|---------|---|--------------------------|---|-----|---|-------------|
| 2417841 | F | South Wes Lower Thai     | 0 | 60  | Y | Withdrawn   |
| 2418877 | F | South Wes Lower Thai     | 2 | 120 | Y | Fail        |
| 2420725 | F | Somalia Re Lower Thai    | 0 | 120 | N | Fail        |
| 2421428 | F | Somalia Re Lower Thai    | 0 | 60  | N | Withdrawn   |
| 2436707 | M | South Regi A Level or I  | 0 | 60  | N | Fail        |
| 2437062 | F | South Regi Lower Thai    | 0 | 60  | N | Withdrawn   |
| 2437428 | F | South Wes A Level or I   | 0 | 90  | N | Fail        |
| 2438291 | F | Sidamo Re, A Level or I  | 0 | 120 | N | Withdrawn   |
| 2439442 | F | Amhara Re Lower Thai     | 0 | 150 | N | Withdrawn   |
| 2440756 | F | Tigrai Regi HE Qualific  | 0 | 60  | N | Pass        |
| 2444501 | F | Addis Abak A Level or I  | 0 | 120 | Y | Withdrawn   |
| 2446599 | F | Addis Abak A Level or I  | 0 | 120 | Y | Pass        |
| 2476144 | F | South Regi Lower Thai    | 1 | 120 | Y | Pass        |
| 2482994 | F | South Regi Lower Thai    | 0 | 60  | N | Withdrawn   |
| 2487785 | F | South Wes Lower Thai     | 1 | 120 | N | Pass        |
| 2494258 | F | Addis Abak A Level or I  | 0 | 120 | N | Withdrawn   |
| 2502127 | F | Sidamo Re, A Level or I  | 0 | 60  | N | Distinction |
| 2509297 | F | Sidamo Re, HE Qualific   | 1 | 240 | N | Withdrawn   |
| 2512349 | F | Sidamo Re, Lower Thai    | 0 | 60  | N | Withdrawn   |
| 2513954 | F | Oromia Re Lower Thai     | 0 | 60  | N | Distinction |
| 2514044 | F | Amhara Re Lower Thai     | 0 | 150 | N | Pass        |
| 2523350 | F | South Regi HE Qualific   | 0 | 60  | N | Pass        |
| 2523430 | F | Sidamo Re, A Level or I  | 0 | 60  | N | Withdrawn   |
| 2523989 | F | Addis Abak Lower Thai    | 0 | 120 | N | Pass        |
| 2524295 | F | Sidamo Re, HE Qualific   | 0 | 60  | N | Pass        |
| 2526784 | F | South Wes Lower Thai     | 0 | 60  | N | Pass        |
| 2532643 | F | South Wes A Level or I   | 0 | 60  | N | Fail        |
| 2533391 | M | South Wes Lower Thai     | 0 | 60  | N | Distinction |
| 2534954 | F | Tigrai Regi Lower Thai   | 3 | 60  | Y | Pass        |
| 2538123 | F | Somalia Re Lower Thai    | 0 | 60  | N | Withdrawn   |
| 2539641 | M | Sidamo Re, Lower Thai    | 0 | 120 | N | Pass        |
| 2541388 | F | Somalia Re Lower Thai    | 0 | 60  | N | Pass        |
| 2552149 | F | Amhara Re Lower Thai     | 0 | 60  | N | Withdrawn   |
| 2554464 | F | Somalia Re Lower Thai    | 0 | 60  | N | Fail        |
| 2567352 | F | South Regi Lower Thai    | 0 | 60  | N | Withdrawn   |
| 2568059 | F | Somalia Re A Level or I  | 0 | 180 | N | Pass        |
| 2570092 | F | South Regi A Level or I  | 0 | 60  | N | Distinction |
| 2571054 | F | Addis Abak Lower Thai    | 0 | 60  | N | Pass        |
| 2574365 | F | South Wes Lower Thai     | 0 | 60  | N | Distinction |
| 2575914 | F | North Regi Lower Thai    | 4 | 120 | Y | Pass        |
| 2578704 | F | Oromia Re A Level or I   | 0 | 120 | N | Withdrawn   |
| 2590564 | F | Sidamo Re, HE Qualific   | 0 | 90  | N | Distinction |
| 2591974 | F | Amhara Re HE Qualific    | 0 | 120 | N | Distinction |
| 2592923 | M | Tigrai Regi Lower Thai   | 0 | 60  | Y | Fail        |
| 2597543 | F | Sidamo Re, A Level or I  | 0 | 60  | N | Pass        |
| 2602679 | F | Tigrai Regi A Level or I | 0 | 60  | N | Distinction |
| 2605113 | F | North Regi No Formal     | 1 | 60  | N | Withdrawn   |

|         |   |                          |   |     |   |             |
|---------|---|--------------------------|---|-----|---|-------------|
| 2609574 | M | South Regi Lower Tha     | 0 | 60  | Y | Withdrawn   |
| 2611847 | F | South Regi A Level or I  | 0 | 60  | N | Fail        |
| 2625752 | F | Addis Abak Lower Tha     | 1 | 180 | N | Fail        |
| 2626410 | F | Tigrai Regi A Level or I | 1 | 60  | N | Fail        |
| 2626511 | F | Sidamo Re A Level or I   | 0 | 60  | Y | Withdrawn   |
| 2632243 | F | South Regi A Level or I  | 0 | 120 | N | Withdrawn   |
| 2634946 | M | South Regi A Level or I  | 0 | 180 | N | Withdrawn   |
| 2636696 | F | South Regi A Level or I  | 0 | 60  | N | Pass        |
| 2641657 | M | North Regi A Level or I  | 0 | 60  | N | Pass        |
| 2641682 | F | South Wes Lower Tha      | 1 | 60  | Y | Fail        |
| 2643007 | F | Sidamo Re HE Qualific    | 0 | 60  | N | Pass        |
| 2652209 | F | Sidamo Re Lower Tha      | 0 | 60  | N | Pass        |
| 2653570 | F | Tigrai Regi A Level or I | 2 | 60  | N | Fail        |
| 2659042 | F | Somalia Re Lower Tha     | 0 | 120 | N | Distinction |
| 2677541 | F | Tigrai Regi Lower Tha    | 0 | 75  | N | Withdrawn   |
| 2681783 | F | Oromia Re Lower Tha      | 0 | 250 | N | Pass        |
| 2683697 | F | Sidamo Re Lower Tha      | 1 | 120 | N | Fail        |
| 2687378 | F | South Regi A Level or I  | 1 | 120 | N | Pass        |
| 2687644 | M | South Wes Lower Tha      | 1 | 60  | Y | Withdrawn   |
| 2690136 | F | Sidamo Re Lower Tha      | 3 | 270 | N | Fail        |
| 2690719 | M | Somalia Re Lower Tha     | 0 | 150 | N | Withdrawn   |
| 26315   | F | Addis Abak Lower Tha     | 1 | 60  | N | Pass        |
| 26734   | M | South Wes A Level or I   | 0 | 90  | Y | Fail        |
| 32327   | F | South Wes Lower Tha      | 2 | 60  | N | Withdrawn   |
| 32930   | F | South Regi A Level or I  | 0 | 60  | N | Pass        |
| 34431   | F | Sidamo Re Lower Tha      | 1 | 60  | N | Withdrawn   |
| 34662   | F | South Wes A Level or I   | 0 | 60  | N | Withdrawn   |
| 38711   | M | South Regi Lower Tha     | 0 | 60  | Y | Withdrawn   |
| 39208   | F | Tigrai Regi A Level or I | 0 | 120 | N | Pass        |
| 41547   | F | Sidamo Re A Level or I   | 0 | 60  | N | Pass        |
| 47891   | F | Tigrai Regi Lower Tha    | 4 | 60  | N | Fail        |
| 53236   | F | Sidamo Re Lower Tha      | 1 | 180 | N | Withdrawn   |
| 57285   | F | Sidamo Re A Level or I   | 0 | 60  | N | Pass        |
| 58520   | F | South Regi A Level or I  | 0 | 120 | Y | Withdrawn   |
| 58653   | F | Amhara Re Lower Tha      | 1 | 120 | N | Pass        |
| 59272   | F | Oromia Re Lower Tha      | 0 | 60  | N | Pass        |
| 61352   | F | Sidamo Re A Level or I   | 2 | 60  | N | Withdrawn   |
| 63467   | F | Amhara Re A Level or I   | 0 | 120 | N | Pass        |
| 65807   | F | Amhara Re HE Qualific    | 2 | 180 | N | Withdrawn   |
| 70569   | F | Tigrai Regi Lower Tha    | 3 | 60  | N | Pass        |
| 70750   | F | Sidamo Re Lower Tha      | 1 | 120 | N | Withdrawn   |
| 71504   | F | Addis Abak A Level or I  | 0 | 120 | N | Pass        |
| 72349   | F | Afar Regioi A Level or I | 0 | 60  | N | Withdrawn   |
| 73584   | F | South Wes Lower Tha      | 1 | 60  | N | Withdrawn   |
| 73874   | F | Tigrai Regi Lower Tha    | 2 | 60  | N | Withdrawn   |
| 74574   | F | Afar Regioi Lower Tha    | 0 | 120 | Y | Withdrawn   |
| 82611   | F | Tigrai Regi Lower Tha    | 0 | 60  | N | Withdrawn   |



|        |   |                          |   |     |   |             |
|--------|---|--------------------------|---|-----|---|-------------|
| 84541  | F | North Regi A Level or I  | 0 | 120 | N | Fail        |
| 89850  | F | South Regi HE Qualific   | 0 | 120 | N | Distinction |
| 98452  | M | South Wes A Level or I   | 0 | 120 | Y | Withdrawn   |
| 98842  | F | South Regi Lower Tha     | 0 | 60  | N | Pass        |
| 99088  | F | Sidamo Re Lower Tha      | 2 | 60  | N | Withdrawn   |
| 102067 | F | Amhara Re A Level or I   | 1 | 120 | N | Withdrawn   |
| 103496 | F | South Wes Lower Tha      | 0 | 60  | N | Pass        |
| 103998 | F | South Regi Lower Tha     | 0 | 60  | N | Fail        |
| 106095 | F | Amhara Re A Level or I   | 0 | 60  | N | Pass        |
| 106383 | F | Afar Regio HE Qualific   | 0 | 60  | N | Withdrawn   |
| 106793 | M | Addis Abak A Level or I  | 0 | 60  | N | Fail        |
| 108859 | M | South Wes A Level or I   | 0 | 60  | Y | Pass        |
| 109441 | F | Oromia Re A Level or I   | 0 | 120 | N | Pass        |
| 110911 | F | Afar Regio Lower Tha     | 0 | 60  | N | Pass        |
| 114402 | F | Oromia Re Lower Tha      | 0 | 90  | Y | Distinction |
| 116606 | M | Somalia Re A Level or I  | 0 | 60  | N | Pass        |
| 117544 | F | South Wes Lower Tha      | 0 | 60  | N | Pass        |
| 117545 | F | Tigrai Regi Lower Tha    | 4 | 120 | N | Fail        |
| 118213 | F | Sidamo Re HE Qualific    | 0 | 60  | N | Fail        |
| 118877 | F | Tigrai Regi Lower Tha    | 3 | 60  | N | Withdrawn   |
| 119437 | F | South Regi Lower Tha     | 2 | 60  | N | Withdrawn   |
| 119444 | F | Somalia Re Lower Tha     | 0 | 120 | N | Withdrawn   |
| 123087 | F | South Regi A Level or I  | 0 | 120 | N | Pass        |
| 125535 | F | Afar Regio A Level or I  | 2 | 120 | N | Pass        |
| 125874 | F | Oromia Re Lower Tha      | 1 | 60  | Y | Withdrawn   |
| 126769 | F | South Regi Lower Tha     | 1 | 60  | N | Pass        |
| 126800 | F | Somalia Re A Level or I  | 0 | 120 | N | Pass        |
| 132055 | F | Addis Abak HE Qualific   | 0 | 60  | N | Withdrawn   |
| 132924 | F | South Wes Lower Tha      | 0 | 60  | N | Fail        |
| 138407 | F | South Wes A Level or I   | 0 | 60  | N | Withdrawn   |
| 142324 | F | Addis Abak Lower Tha     | 1 | 120 | N | Pass        |
| 145280 | F | Somalia Re Lower Tha     | 1 | 60  | N | Pass        |
| 150398 | F | Somalia Re A Level or I  | 0 | 60  | Y | Distinction |
| 151917 | F | South Regi A Level or I  | 4 | 60  | N | Pass        |
| 152973 | F | Afar Regio Lower Tha     | 0 | 120 | N | Pass        |
| 155484 | F | South Wes Lower Tha      | 0 | 120 | N | Distinction |
| 156358 | F | South Wes Lower Tha      | 2 | 60  | N | Withdrawn   |
| 157752 | F | Tigrai Regi A Level or I | 0 | 120 | N | Fail        |
| 160026 | F | South Regi A Level or I  | 2 | 60  | N | Pass        |
| 161811 | F | South Wes A Level or I   | 0 | 60  | N | Withdrawn   |
| 165099 | F | Somalia Re Lower Tha     | 0 | 180 | N | Fail        |
| 165498 | F | Addis Abak Lower Tha     | 0 | 270 | Y | Withdrawn   |
| 169008 | M | South Wes Lower Tha      | 0 | 60  | N | Pass        |
| 169400 | F | Tigrai Regi HE Qualific  | 0 | 120 | N | Distinction |
| 173163 | F | South Wes A Level or I   | 0 | 60  | N | Fail        |
| 177554 | F | South Regi A Level or I  | 0 | 60  | N | Fail        |
| 179073 | F | Addis Abak Lower Tha     | 1 | 60  | N | Withdrawn   |

|        |   |                          |   |     |   |             |
|--------|---|--------------------------|---|-----|---|-------------|
| 179297 | F | Somalia Re Lower Tha     | 1 | 60  | N | Fail        |
| 184234 | F | South Wes Lower Tha      | 1 | 60  | N | Fail        |
| 184583 | F | Tigrai Regi Lower Tha    | 3 | 60  | N | Fail        |
| 184972 | F | Afar Regio Lower Tha     | 0 | 60  | N | Pass        |
| 188766 | F | South Wes A Level or I   | 0 | 120 | N | Pass        |
| 191459 | F | Afar Regio A Level or I  | 1 | 60  | Y | Fail        |
| 191746 | F | Tigrai Regi Lower Tha    | 2 | 90  | N | Fail        |
| 191973 | F | Tigrai Regi HE Qualific  | 0 | 60  | N | Pass        |
| 192944 | F | Somalia Re Lower Tha     | 0 | 60  | N | Pass        |
| 193310 | F | South Wes HE Qualific    | 0 | 120 | N | Pass        |
| 195221 | F | Tigrai Regi A Level or I | 1 | 60  | N | Fail        |
| 195345 | F | Addis Abat Lower Tha     | 1 | 60  | N | Pass        |
| 195940 | F | Tigrai Regi Lower Tha    | 0 | 60  | N | Pass        |
| 197527 | F | Tigrai Regi Lower Tha    | 0 | 60  | N | Fail        |
| 201655 | F | Sidamo Re A Level or I   | 0 | 60  | N | Withdrawn   |
| 205978 | F | Tigrai Regi Lower Tha    | 0 | 60  | N | Withdrawn   |
| 226839 | F | South Regi A Level or I  | 0 | 60  | N | Pass        |
| 228235 | F | Sidamo Re A Level or I   | 2 | 60  | N | Withdrawn   |
| 228909 | M | North Regi Lower Tha     | 0 | 60  | Y | Withdrawn   |
| 229326 | F | South Regi Lower Tha     | 0 | 60  | N | Withdrawn   |
| 230383 | F | Sidamo Re A Level or I   | 0 | 60  | N | Pass        |
| 235371 | M | Addis Abat A Level or I  | 0 | 60  | N | Pass        |
| 237913 | F | Amhara Re A Level or I   | 2 | 60  | N | Pass        |
| 238144 | F | Tigrai Regi A Level or I | 3 | 60  | N | Fail        |
| 242893 | F | Sidamo Re No Formal      | 2 | 60  | N | Withdrawn   |
| 245784 | F | Addis Abat HE Qualific   | 1 | 60  | N | Fail        |
| 247457 | F | Oromia Re A Level or I   | 0 | 60  | N | Distinction |
| 247967 | F | South Regi Lower Tha     | 0 | 60  | N | Withdrawn   |
| 249154 | F | Sidamo Re A Level or I   | 0 | 60  | N | Fail        |
| 252863 | M | Somalia Re Lower Tha     | 0 | 60  | N | Pass        |
| 254313 | F | Oromia Re HE Qualific    | 0 | 240 | Y | Withdrawn   |
| 254612 | M | Afar Regio A Level or I  | 3 | 90  | N | Fail        |
| 255957 | F | South Regi Lower Tha     | 1 | 60  | N | Withdrawn   |
| 258268 | F | Somalia Re HE Qualific   | 0 | 120 | N | Pass        |
| 258840 | F | Sidamo Re A Level or I   | 1 | 60  | N | Pass        |
| 260137 | M | South Regi HE Qualific   | 0 | 60  | N | Pass        |
| 260216 | F | Amhara Re Lower Tha      | 1 | 60  | N | Fail        |
| 260777 | F | Amhara Re Lower Tha      | 2 | 90  | N | Withdrawn   |
| 263448 | F | South Wes HE Qualific    | 0 | 60  | N | Pass        |
| 264281 | M | Amhara Re A Level or I   | 0 | 180 | N | Withdrawn   |
| 264694 | F | Tigrai Regi Lower Tha    | 0 | 60  | N | Fail        |
| 264732 | F | South Regi Lower Tha     | 2 | 120 | N | Withdrawn   |
| 265466 | F | South Wes A Level or I   | 1 | 60  | N | Pass        |
| 267774 | F | Afar Regio A Level or I  | 0 | 60  | N | Withdrawn   |
| 269510 | F | Somalia Re A Level or I  | 0 | 60  | Y | Fail        |
| 270191 | F | South Regi Lower Tha     | 0 | 120 | N | Withdrawn   |
| 271047 | F | South Wes Lower Tha      | 0 | 60  | N | Withdrawn   |

|        |   |                          |   |     |   |             |
|--------|---|--------------------------|---|-----|---|-------------|
| 272000 | M | Sidamo Re HE Qualific    | 0 | 90  | N | Fail        |
| 272617 | F | Somalia Re Lower Tha     | 3 | 60  | Y | Withdrawn   |
| 275006 | F | Sidamo Re Lower Tha      | 2 | 60  | N | Pass        |
| 275180 | F | Somalia Re Lower Tha     | 0 | 60  | N | Pass        |
| 275296 | F | Somalia Re A Level or I  | 2 | 60  | N | Fail        |
| 276925 | F | Tigrai Regi A Level or I | 1 | 60  | N | Pass        |
| 277967 | M | Sidamo Re Lower Tha      | 1 | 60  | N | Pass        |
| 279238 | M | Addis Abak Lower Tha     | 0 | 60  | N | Withdrawn   |
| 280054 | F | Tigrai Regi Lower Tha    | 0 | 60  | N | Fail        |
| 280152 | F | Oromia Re A Level or I   | 0 | 60  | N | Distinction |
| 284246 | F | South Wes A Level or I   | 0 | 60  | N | Fail        |
| 284762 | F | Somalia Re A Level or I  | 2 | 60  | N | Pass        |
| 285470 | F | Addis Abak A Level or I  | 0 | 180 | N | Pass        |
| 285992 | F | South Wes A Level or I   | 0 | 60  | N | Withdrawn   |
| 286338 | F | South Regi Lower Tha     | 0 | 60  | N | Pass        |
| 286947 | F | Somalia Re A Level or I  | 1 | 60  | N | Pass        |
| 288086 | F | Amhara Re A Level or I   | 0 | 180 | N | Pass        |
| 288655 | F | North Regi A Level or I  | 0 | 60  | N | Withdrawn   |
| 290184 | F | Addis Abak HE Qualific   | 0 | 120 | N | Pass        |
| 292813 | F | Addis Abak A Level or I  | 1 | 120 | Y | Withdrawn   |
| 293387 | F | Tigrai Regi Lower Tha    | 0 | 60  | N | Pass        |
| 293989 | F | Sidamo Re A Level or I   | 0 | 60  | Y | Withdrawn   |
| 294134 | F | Addis Abak A Level or I  | 0 | 60  | N | Pass        |
| 297179 | F | North Regi Lower Tha     | 1 | 60  | N | Pass        |
| 297685 | F | South Wes A Level or I   | 0 | 120 | N | Pass        |
| 297806 | F | Somalia Re Lower Tha     | 0 | 60  | N | Fail        |
| 298187 | F | Afar Regi Lower Tha      | 0 | 60  | N | Pass        |
| 298303 | F | South Wes A Level or I   | 0 | 60  | N | Distinction |
| 298961 | F | South Regi Lower Tha     | 1 | 60  | N | Pass        |
| 300819 | M | South Regi HE Qualific   | 0 | 60  | N | Distinction |
| 303165 | F | Sidamo Re Lower Tha      | 0 | 60  | N | Pass        |
| 303617 | F | Tigrai Regi Lower Tha    | 1 | 60  | N | Pass        |
| 305909 | F | South Regi A Level or I  | 0 | 60  | N | Pass        |
| 306478 | F | South Wes Lower Tha      | 0 | 60  | N | Pass        |
| 306880 | F | Tigrai Regi Lower Tha    | 0 | 90  | N | Withdrawn   |
| 308775 | F | North Regi A Level or I  | 0 | 120 | N | Distinction |
| 308850 | M | Tigrai Regi Lower Tha    | 0 | 120 | N | Fail        |
| 314252 | M | South Regi A Level or I  | 0 | 60  | N | Pass        |
| 314675 | F | Amhara Re A Level or I   | 0 | 60  | N | Pass        |
| 314801 | F | Amhara Re Lower Tha      | 1 | 60  | N | Pass        |
| 316421 | F | Addis Abak Lower Tha     | 1 | 60  | N | Withdrawn   |
| 321450 | F | Tigrai Regi Lower Tha    | 1 | 120 | N | Pass        |
| 322184 | F | South Wes Lower Tha      | 0 | 60  | N | Withdrawn   |
| 322574 | F | South Wes A Level or I   | 0 | 60  | Y | Fail        |
| 327224 | F | South Wes A Level or I   | 3 | 60  | N | Fail        |
| 327940 | F | Addis Abak A Level or I  | 0 | 60  | N | Pass        |
| 330917 | F | Somalia Re A Level or I  | 0 | 60  | N | Pass        |

|        |   |             |             |   |     |   |             |
|--------|---|-------------|-------------|---|-----|---|-------------|
| 330981 | F | Tigrai Regi | A Level or  | 0 | 60  | N | Withdrawn   |
| 335035 | F | Addis Abak  | Lower Thar  | 0 | 60  | N | Fail        |
| 335765 | F | South Regi  | A Level or  | 1 | 60  | N | Withdrawn   |
| 338554 | F | Afar Regioi | HE Qualific | 0 | 60  | N | Pass        |
| 340216 | F | South Regi  | A Level or  | 0 | 90  | N | Pass        |
| 340592 | F | Tigrai Regi | A Level or  | 3 | 120 | N | Fail        |
| 340899 | M | Tigrai Regi | Lower Thar  | 0 | 60  | N | Withdrawn   |
| 341611 | F | Amhara Re   | Lower Thar  | 1 | 120 | N | Fail        |
| 342192 | F | Addis Abak  | A Level or  | 0 | 90  | Y | Pass        |
| 343138 | F | Sidamo Re   | A Level or  | 0 | 60  | N | Fail        |
| 345128 | F | Addis Abak  | A Level or  | 3 | 60  | N | Fail        |
| 349924 | F | North Regi  | Lower Thar  | 1 | 60  | N | Withdrawn   |
| 350312 | F | Tigrai Regi | A Level or  | 1 | 90  | N | Fail        |
| 350797 | F | Sidamo Re   | Lower Thar  | 1 | 60  | N | Pass        |
| 351050 | F | South Wes   | Lower Thar  | 0 | 60  | N | Pass        |
| 353617 | F | Tigrai Regi | Lower Thar  | 0 | 60  | N | Fail        |
| 357901 | F | North Regi  | Lower Thar  | 1 | 90  | N | Fail        |
| 358001 | F | Tigrai Regi | A Level or  | 0 | 120 | N | Pass        |
| 358204 | F | Afar Regioi | Lower Thar  | 0 | 120 | N | Distinction |
| 361411 | F | Afar Regioi | HE Qualific | 0 | 60  | N | Pass        |
| 363213 | M | Afar Regioi | A Level or  | 0 | 60  | N | Pass        |
| 364527 | F | South Wes   | A Level or  | 2 | 60  | N | Pass        |
| 365097 | F | North Regi  | A Level or  | 0 | 120 | N | Distinction |
| 365111 | F | Afar Regioi | HE Qualific | 2 | 120 | Y | Fail        |
| 366479 | F | Addis Abak  | A Level or  | 0 | 60  | N | Pass        |
| 366791 | F | Amhara Re   | Lower Thar  | 1 | 120 | N | Withdrawn   |
| 368521 | F | Amhara Re   | A Level or  | 0 | 60  | N | Pass        |
| 369234 | F | Tigrai Regi | Lower Thar  | 2 | 60  | Y | Fail        |
| 372602 | F | South Regi  | A Level or  | 0 | 120 | N | Distinction |
| 373174 | F | South Regi  | A Level or  | 2 | 60  | N | Pass        |
| 373846 | F | South Regi  | A Level or  | 1 | 60  | N | Withdrawn   |
| 376117 | F | South Regi  | A Level or  | 0 | 60  | N | Withdrawn   |
| 379212 | F | Amhara Re   | Lower Thar  | 0 | 180 | N | Withdrawn   |
| 379720 | F | Somalia Re  | Lower Thar  | 0 | 60  | Y | Pass        |
| 380515 | F | Sidamo Re   | Lower Thar  | 0 | 120 | N | Withdrawn   |
| 381882 | F | Addis Abak  | A Level or  | 1 | 120 | N | Fail        |
| 384266 | F | South Regi  | A Level or  | 0 | 60  | N | Withdrawn   |
| 385341 | F | Amhara Re   | A Level or  | 0 | 60  | N | Fail        |
| 385405 | M | South Wes   | A Level or  | 1 | 60  | N | Pass        |
| 387276 | F | Amhara Re   | Lower Thar  | 4 | 60  | N | Withdrawn   |
| 387406 | F | Tigrai Regi | Lower Thar  | 2 | 60  | N | Fail        |
| 387773 | F | Afar Regioi | A Level or  | 0 | 120 | N | Distinction |
| 388738 | M | South Regi  | A Level or  | 1 | 60  | N | Withdrawn   |
| 391937 | F | South Wes   | A Level or  | 0 | 60  | N | Pass        |
| 393529 | F | Afar Regioi | HE Qualific | 3 | 60  | N | Withdrawn   |
| 394314 | F | Sidamo Re   | Lower Thar  | 0 | 60  | N | Withdrawn   |
| 395169 | F | Oromia Re   | Lower Thar  | 0 | 60  | Y | Withdrawn   |

|        |   |                           |   |     |   |             |
|--------|---|---------------------------|---|-----|---|-------------|
| 395320 | F | South Regi HE Qualific    | 1 | 60  | N | Pass        |
| 395822 | F | South Wes A Level or I    | 0 | 60  | N | Pass        |
| 396016 | F | Addis Abak A Level or I   | 0 | 60  | N | Fail        |
| 396673 | F | South Regi A Level or I   | 0 | 240 | N | Withdrawn   |
| 397414 | F | South Regi A Level or I   | 2 | 60  | Y | Pass        |
| 398071 | F | Sidamo Re A Level or I    | 0 | 60  | N | Withdrawn   |
| 398442 | M | Afar Regioi A Level or I  | 0 | 120 | N | Pass        |
| 399737 | M | Addis Abak A Level or I   | 1 | 60  | N | Distinction |
| 400549 | F | Tigrai Regio A Level or I | 0 | 120 | N | Pass        |
| 401317 | F | Afar Regioi A Level or I  | 2 | 60  | N | Pass        |
| 402180 | F | Sidamo Re Lower Than      | 0 | 60  | N | Pass        |
| 403213 | F | South Regi A Level or I   | 0 | 60  | N | Pass        |
| 404121 | F | Tigrai Regio Lower Than   | 0 | 60  | N | Pass        |
| 404415 | F | Sidamo Re Lower Than      | 1 | 120 | N | Pass        |
| 406000 | F | Oromia Re Lower Than      | 1 | 60  | N | Pass        |
| 409708 | F | Addis Abak Lower Than     | 2 | 120 | N | Pass        |
| 411105 | F | South Regi A Level or I   | 0 | 120 | N | Withdrawn   |
| 411150 | F | Sidamo Re Lower Than      | 0 | 60  | N | Withdrawn   |
| 412081 | F | South Wes A Level or I    | 1 | 60  | N | Pass        |
| 412343 | F | Afar Regioi Lower Than    | 0 | 60  | Y | Fail        |
| 414663 | F | Amhara Re Lower Than      | 0 | 120 | N | Withdrawn   |
| 417971 | F | Afar Regioi HE Qualific   | 0 | 120 | Y | Withdrawn   |
| 417978 | F | Tigrai Regio HE Qualific  | 0 | 60  | N | Withdrawn   |
| 417986 | F | Oromia Re Lower Than      | 0 | 60  | N | Pass        |
| 418077 | F | Afar Regioi HE Qualific   | 0 | 60  | N | Pass        |
| 418206 | M | Amhara Re A Level or I    | 0 | 120 | Y | Withdrawn   |
| 418502 | F | Sidamo Re A Level or I    | 0 | 60  | N | Withdrawn   |
| 419924 | F | Afar Regioi HE Qualific   | 0 | 60  | Y | Withdrawn   |
| 420631 | F | Sidamo Re Lower Than      | 0 | 60  | N | Pass        |
| 423398 | F | Afar Regioi HE Qualific   | 0 | 60  | N | Pass        |
| 423613 | F | South Regi HE Qualific    | 0 | 120 | Y | Withdrawn   |
| 424220 | M | Oromia Re A Level or I    | 0 | 120 | N | Pass        |
| 424586 | F | Oromia Re A Level or I    | 0 | 120 | N | Withdrawn   |
| 425314 | F | Sidamo Re Lower Than      | 0 | 120 | N | Withdrawn   |
| 425772 | F | Sidamo Re Lower Than      | 0 | 120 | N | Pass        |
| 426340 | F | Somalia Re A Level or I   | 2 | 120 | N | Withdrawn   |
| 426624 | F | South Regi Lower Than     | 0 | 60  | N | Distinction |
| 430530 | F | South Regi Lower Than     | 0 | 60  | N | Withdrawn   |
| 433064 | F | Tigrai Regio A Level or I | 0 | 60  | N | Fail        |
| 433939 | F | Sidamo Re Lower Than      | 1 | 60  | N | Fail        |
| 435287 | F | Tigrai Regio Lower Than   | 0 | 195 | N | Fail        |
| 437550 | F | Sidamo Re A Level or I    | 0 | 60  | N | Pass        |
| 439677 | F | Amhara Re Lower Than      | 0 | 60  | N | Pass        |
| 439806 | F | Afar Regioi A Level or I  | 0 | 60  | N | Distinction |
| 440912 | M | South Regi A Level or I   | 0 | 120 | Y | Withdrawn   |
| 442685 | F | Somalia Re Lower Than     | 0 | 60  | N | Withdrawn   |
| 442745 | F | South Regi A Level or I   | 0 | 60  | N | Withdrawn   |

|        |   |                   |                     |   |     |   |             |
|--------|---|-------------------|---------------------|---|-----|---|-------------|
| 444361 | F | Afar Region       | A Level or Higher   | 0 | 60  | N | Distinction |
| 444545 | F | Afar Region       | Lower Than A Level  | 0 | 60  | N | Pass        |
| 444768 | F | Sidamo Region     | A Level or Higher   | 0 | 60  | N | Pass        |
| 445136 | F | Oromia Region     | HE Qualification    | 1 | 60  | N | Distinction |
| 445647 | F | South West Region | A Level or Higher   | 0 | 180 | N | Withdrawn   |
| 445774 | M | Oromia Region     | HE Qualification    | 0 | 60  | N | Distinction |
| 446619 | M | South West Region | A Level or Higher   | 0 | 60  | N | Withdrawn   |
| 447124 | F | Afar Region       | A Level or Higher   | 0 | 60  | N | Pass        |
| 447324 | F | Afar Region       | Lower Than A Level  | 0 | 60  | N | Fail        |
| 467396 | F | Tigray Region     | Lower Than A Level  | 2 | 60  | N | Distinction |
| 469579 | M | Sidamo Region     | Lower Than A Level  | 0 | 60  | N | Pass        |
| 469803 | M | South West Region | A Level or Higher   | 0 | 120 | Y | Withdrawn   |
| 470464 | F | South Region      | A Level or Higher   | 0 | 60  | Y | Pass        |
| 473095 | F | Somalia Region    | A Level or Higher   | 3 | 120 | N | Pass        |
| 473271 | F | Oromia Region     | A Level or Higher   | 0 | 60  | N | Pass        |
| 473444 | F | Amhara Region     | Lower Than A Level  | 0 | 60  | N | Withdrawn   |
| 474387 | F | Somalia Region    | Lower Than A Level  | 0 | 60  | N | Pass        |
| 474408 | F | Sidamo Region     | Lower Than A Level  | 0 | 120 | Y | Pass        |
| 475363 | F | Tigray Region     | A Level or Higher   | 1 | 165 | N | Pass        |
| 476253 | F | Oromia Region     | Lower Than A Level  | 0 | 180 | N | Withdrawn   |
| 476769 | F | Oromia Region     | A Level or Higher   | 0 | 60  | N | Pass        |
| 478412 | F | Amhara Region     | A Level or Higher   | 0 | 60  | N | Distinction |
| 480988 | F | South Region      | HE Qualification    | 2 | 60  | N | Withdrawn   |
| 481593 | F | Tigray Region     | HE Qualification    | 0 | 60  | N | Distinction |
| 481790 | F | South West Region | A Level or Higher   | 1 | 60  | N | Pass        |
| 483315 | F | Amhara Region     | Lower Than A Level  | 0 | 60  | N | Pass        |
| 483508 | F | South West Region | Lower Than A Level  | 0 | 60  | N | Distinction |
| 483674 | F | Tigray Region     | No Formal Education | 0 | 60  | N | Fail        |
| 484158 | M | Afar Region       | HE Qualification    | 0 | 120 | N | Withdrawn   |
| 484252 | F | Sidamo Region     | A Level or Higher   | 0 | 60  | N | Pass        |
| 484443 | F | Tigray Region     | Lower Than A Level  | 1 | 60  | N | Fail        |
| 484490 | F | South Region      | A Level or Higher   | 0 | 60  | N | Pass        |
| 484550 | F | Tigray Region     | Lower Than A Level  | 0 | 120 | N | Fail        |
| 485439 | F | Tigray Region     | Lower Than A Level  | 2 | 60  | Y | Withdrawn   |
| 485853 | F | Afar Region       | HE Qualification    | 1 | 180 | Y | Withdrawn   |
| 486516 | F | Somalia Region    | A Level or Higher   | 0 | 60  | N | Fail        |
| 488242 | F | Oromia Region     | A Level or Higher   | 0 | 120 | N | Withdrawn   |
| 488854 | F | Oromia Region     | Lower Than A Level  | 0 | 60  | N | Withdrawn   |
| 490299 | F | South Region      | Lower Than A Level  | 0 | 60  | N | Withdrawn   |
| 490648 | F | Amhara Region     | Lower Than A Level  | 0 | 120 | N | Fail        |
| 491001 | F | Oromia Region     | A Level or Higher   | 0 | 120 | N | Withdrawn   |
| 491387 | M | South Region      | A Level or Higher   | 0 | 60  | N | Distinction |
| 492579 | F | South Region      | A Level or Higher   | 0 | 60  | N | Withdrawn   |
| 492592 | F | South West Region | Lower Than A Level  | 0 | 90  | N | Distinction |
| 492676 | F | Afar Region       | A Level or Higher   | 2 | 120 | Y | Pass        |
| 492979 | F | Addis Ababa       | A Level or Higher   | 0 | 60  | N | Pass        |
| 493443 | F | Sidamo Region     | No Formal Education | 1 | 60  | N | Pass        |

|        |   |                          |   |     |   |             |
|--------|---|--------------------------|---|-----|---|-------------|
| 493460 | F | South Regi Lower Tha     | 0 | 60  | N | Pass        |
| 493609 | F | South Wes Lower Tha      | 0 | 60  | N | Withdrawn   |
| 493763 | F | South Regi A Level or I  | 1 | 60  | N | Withdrawn   |
| 494212 | F | South Regi Lower Tha     | 0 | 60  | N | Withdrawn   |
| 495239 | F | Sidamo Re Lower Tha      | 0 | 60  | N | Fail        |
| 495489 | F | South Wes Lower Tha      | 1 | 60  | N | Fail        |
| 495522 | F | Sidamo Re A Level or I   | 0 | 120 | N | Withdrawn   |
| 495786 | M | Afar Regio HE Qualific   | 1 | 60  | Y | Fail        |
| 496373 | F | Sidamo Re Lower Tha      | 0 | 240 | N | Withdrawn   |
| 496381 | M | North Regi A Level or I  | 0 | 60  | N | Pass        |
| 497074 | F | Somalia Re Lower Tha     | 0 | 60  | N | Pass        |
| 497084 | M | Oromia Re Lower Tha      | 0 | 60  | Y | Pass        |
| 498841 | F | Somalia Re A Level or I  | 1 | 180 | N | Pass        |
| 499790 | F | Sidamo Re A Level or I   | 0 | 60  | Y | Pass        |
| 499819 | F | Sidamo Re A Level or I   | 0 | 60  | N | Pass        |
| 500502 | F | Addis Abak Lower Tha     | 0 | 60  | N | Fail        |
| 501414 | F | Somalia Re A Level or I  | 0 | 60  | N | Withdrawn   |
| 502767 | F | Oromia Re A Level or I   | 0 | 60  | N | Pass        |
| 503159 | F | Oromia Re Lower Tha      | 0 | 60  | N | Withdrawn   |
| 503663 | F | Somalia Re Lower Tha     | 0 | 60  | Y | Withdrawn   |
| 504066 | F | Somalia Re Lower Tha     | 0 | 120 | N | Withdrawn   |
| 504597 | M | South Regi Lower Tha     | 0 | 60  | N | Pass        |
| 505595 | F | Sidamo Re Lower Tha      | 3 | 60  | Y | Withdrawn   |
| 505692 | F | North Regi Lower Tha     | 0 | 120 | N | Withdrawn   |
| 505871 | F | South Wes A Level or I   | 1 | 60  | N | Fail        |
| 505878 | F | Somalia Re A Level or I  | 0 | 60  | N | Fail        |
| 506020 | F | Afar Regio HE Qualific   | 2 | 60  | N | Pass        |
| 506219 | F | South Regi A Level or I  | 0 | 120 | N | Pass        |
| 506679 | F | Sidamo Re Lower Tha      | 0 | 60  | N | Withdrawn   |
| 507014 | F | Addis Abak A Level or I  | 0 | 60  | N | Pass        |
| 507149 | F | Sidamo Re HE Qualific    | 0 | 60  | N | Distinction |
| 507386 | F | Sidamo Re Lower Tha      | 0 | 60  | N | Fail        |
| 507783 | F | Tigrai Regi HE Qualific  | 0 | 60  | N | Pass        |
| 508431 | F | South Wes Lower Tha      | 0 | 60  | N | Withdrawn   |
| 509466 | F | South Wes HE Qualific    | 1 | 60  | N | Fail        |
| 509578 | F | South Regi A Level or I  | 0 | 60  | N | Pass        |
| 509935 | F | Sidamo Re Lower Tha      | 1 | 60  | N | Pass        |
| 510068 | F | Afar Regio HE Qualific   | 1 | 120 | N | Fail        |
| 510471 | F | South Regi Lower Tha     | 0 | 60  | N | Pass        |
| 511001 | F | Addis Abak A Level or I  | 0 | 180 | Y | Pass        |
| 511295 | F | Afar Regio HE Qualific   | 0 | 60  | N | Fail        |
| 511424 | F | North Regi Lower Tha     | 0 | 60  | N | Withdrawn   |
| 511807 | F | Somalia Re Lower Tha     | 0 | 60  | N | Pass        |
| 511962 | F | Sidamo Re A Level or I   | 0 | 60  | N | Withdrawn   |
| 512411 | F | Tigrai Regi A Level or I | 0 | 60  | N | Distinction |
| 512493 | M | Sidamo Re A Level or I   | 0 | 120 | N | Withdrawn   |
| 512722 | F | South Regi Lower Tha     | 1 | 60  | N | Pass        |

|        |   |                            |   |     |   |             |
|--------|---|----------------------------|---|-----|---|-------------|
| 513250 | F | Afar Region HE Qualific    | 0 | 60  | N | Fail        |
| 513751 | F | Amhara Region HE Qualific  | 0 | 60  | Y | Pass        |
| 514006 | F | Addis Ababa Lower Than     | 0 | 240 | N | Withdrawn   |
| 514581 | F | Amhara Region Lower Than   | 0 | 120 | N | Withdrawn   |
| 515329 | F | South Region A Level or I  | 0 | 120 | Y | Pass        |
| 515349 | F | Sidamo Region HE Qualific  | 0 | 120 | N | Distinction |
| 516434 | F | Addis Ababa A Level or I   | 0 | 60  | N | Pass        |
| 516588 | F | Sidamo Region A Level or I | 0 | 60  | N | Fail        |
| 517112 | M | Sidamo Region HE Qualific  | 1 | 120 | N | Withdrawn   |
| 518389 | M | Afar Region HE Qualific    | 4 | 180 | Y | Pass        |
| 519995 | F | South West A Level or I    | 0 | 240 | N | Withdrawn   |
| 520024 | F | Sidamo Region A Level or I | 1 | 60  | N | Pass        |
| 520076 | F | South Region Lower Than    | 0 | 120 | N | Pass        |
| 520972 | F | Afar Region HE Qualific    | 1 | 60  | N | Pass        |
| 521081 | F | Sidamo Region Lower Than   | 1 | 60  | Y | Pass        |
| 521164 | F | South West Lower Than      | 0 | 60  | Y | Fail        |
| 522189 | F | Tigray Region Lower Than   | 3 | 60  | N | Pass        |
| 522381 | F | Afar Region Lower Than     | 0 | 60  | N | Pass        |
| 522478 | F | Somalia Region Lower Than  | 0 | 210 | Y | Fail        |
| 522784 | F | Tigray Region Lower Than   | 0 | 120 | N | Withdrawn   |
| 523132 | F | Addis Ababa A Level or I   | 1 | 60  | N | Pass        |
| 523831 | F | South Region A Level or I  | 0 | 60  | N | Withdrawn   |
| 523905 | F | South Region Lower Than    | 0 | 120 | N | Pass        |
| 524043 | F | South Region A Level or I  | 0 | 60  | N | Distinction |
| 526789 | F | Amhara Region Lower Than   | 0 | 120 | N | Withdrawn   |
| 526844 | F | Amhara Region A Level or I | 2 | 60  | N | Withdrawn   |
| 527102 | F | Addis Ababa A Level or I   | 0 | 120 | N | Fail        |
| 527742 | F | Amhara Region Lower Than   | 0 | 60  | N | Fail        |
| 528432 | F | Amhara Region A Level or I | 0 | 60  | N | Distinction |
| 528702 | F | Tigray Region Lower Than   | 1 | 60  | N | Fail        |
| 530021 | F | Sidamo Region A Level or I | 1 | 60  | N | Withdrawn   |
| 530772 | F | Tigray Region A Level or I | 0 | 60  | N | Pass        |
| 530941 | F | Addis Ababa Lower Than     | 0 | 60  | N | Pass        |
| 530960 | F | South West HE Qualific     | 0 | 120 | N | Withdrawn   |
| 531450 | F | Tigray Region Lower Than   | 0 | 60  | N | Fail        |
| 531753 | M | Afar Region Lower Than     | 1 | 60  | N | Pass        |
| 531865 | M | Afar Region HE Qualific    | 0 | 60  | N | Pass        |
| 532779 | F | Addis Ababa A Level or I   | 0 | 60  | N | Pass        |
| 532794 | F | Afar Region A Level or I   | 0 | 120 | N | Withdrawn   |
| 533209 | F | Tigray Region HE Qualific  | 0 | 60  | N | Pass        |
| 534428 | F | North Region Lower Than    | 1 | 120 | N | Pass        |
| 534588 | F | South Region A Level or I  | 1 | 120 | N | Withdrawn   |
| 534715 | M | Amhara Region A Level or I | 0 | 120 | N | Pass        |
| 534884 | F | Tigray Region Lower Than   | 0 | 60  | N | Withdrawn   |
| 535963 | F | Sidamo Region HE Qualific  | 0 | 60  | N | Distinction |
| 536767 | F | Tigray Region Lower Than   | 0 | 60  | Y | Fail        |
| 537194 | F | Amhara Region A Level or I | 0 | 60  | N | Pass        |



|        |   |                          |   |     |   |             |
|--------|---|--------------------------|---|-----|---|-------------|
| 537221 | F | South Wes A Level or I   | 3 | 120 | N | Withdrawn   |
| 537640 | F | South Regi Lower Tha     | 0 | 60  | Y | Distinction |
| 539635 | F | Oromia Re HE Qualific    | 0 | 120 | N | Distinction |
| 539657 | M | South Regi Lower Tha     | 1 | 120 | N | Withdrawn   |
| 541123 | F | Amhara Re No Formal      | 0 | 120 | N | Withdrawn   |
| 541171 | F | Tigrai Regi A Level or I | 2 | 60  | N | Fail        |
| 541315 | F | Somalia Re Lower Tha     | 0 | 120 | N | Fail        |
| 541476 | F | Tigrai Regi A Level or I | 0 | 60  | N | Pass        |
| 541995 | F | Sidamo Re Lower Tha      | 0 | 60  | Y | Withdrawn   |
| 542164 | F | Afar Regio HE Qualific   | 0 | 60  | N | Pass        |
| 543439 | F | South Regi A Level or I  | 0 | 60  | N | Pass        |
| 544177 | F | South Regi Lower Tha     | 0 | 120 | N | Withdrawn   |
| 545964 | F | South Wes A Level or I   | 0 | 120 | N | Pass        |
| 546114 | F | Somalia Re Lower Tha     | 0 | 60  | N | Withdrawn   |
| 546250 | F | Amhara Re HE Qualific    | 0 | 60  | Y | Pass        |
| 547408 | F | Afar Regio A Level or I  | 0 | 120 | N | Pass        |
| 547788 | F | Afar Regio HE Qualific   | 0 | 60  | N | Pass        |
| 549288 | F | Addis Abak A Level or I  | 0 | 120 | N | Withdrawn   |
| 549775 | F | Sidamo Re Lower Tha      | 0 | 180 | N | Distinction |
| 549839 | F | Sidamo Re A Level or I   | 0 | 180 | N | Withdrawn   |
| 550081 | M | South Wes Lower Tha      | 0 | 60  | N | Pass        |
| 550245 | F | South Regi Lower Tha     | 0 | 60  | N | Pass        |
| 551000 | F | Tigrai Regi A Level or I | 1 | 120 | N | Fail        |
| 551237 | F | South Regi Lower Tha     | 0 | 60  | N | Withdrawn   |
| 551242 | F | South Wes HE Qualific    | 0 | 60  | N | Pass        |
| 551276 | F | Addis Abak Lower Tha     | 0 | 180 | N | Pass        |
| 551922 | F | Sidamo Re Lower Tha      | 0 | 60  | N | Pass        |
| 552698 | M | South Wes Lower Tha      | 0 | 60  | Y | Fail        |
| 553196 | F | Afar Regio Lower Tha     | 2 | 120 | Y | Withdrawn   |
| 554048 | F | Amhara Re A Level or I   | 0 | 60  | N | Pass        |
| 554243 | F | South Wes Lower Tha      | 1 | 60  | N | Fail        |
| 554599 | F | Tigrai Regi A Level or I | 1 | 60  | Y | Pass        |
| 555749 | F | Afar Regio A Level or I  | 0 | 120 | N | Pass        |
| 556290 | F | Addis Abak Lower Tha     | 0 | 120 | Y | Withdrawn   |
| 556644 | F | Addis Abak A Level or I  | 0 | 60  | N | Distinction |
| 556863 | F | South Wes A Level or I   | 1 | 60  | N | Pass        |
| 557085 | F | Sidamo Re Lower Tha      | 0 | 120 | N | Withdrawn   |
| 559344 | M | South Regi A Level or I  | 1 | 120 | N | Pass        |
| 559685 | F | Afar Regio HE Qualific   | 1 | 60  | N | Fail        |
| 559973 | F | Addis Abak Lower Tha     | 0 | 60  | N | Withdrawn   |
| 560089 | F | South Regi A Level or I  | 1 | 60  | N | Pass        |
| 560208 | M | Addis Abak Lower Tha     | 1 | 60  | N | Pass        |
| 560597 | F | Amhara Re A Level or I   | 0 | 60  | N | Distinction |
| 560652 | M | Oromia Re Lower Tha      | 0 | 60  | N | Pass        |
| 561206 | F | Addis Abak HE Qualific   | 0 | 60  | N | Pass        |
| 561608 | F | Sidamo Re A Level or I   | 0 | 120 | N | Pass        |
| 561618 | F | Afar Regio HE Qualific   | 0 | 60  | N | Pass        |

|        |   |                        |   |     |   |             |
|--------|---|------------------------|---|-----|---|-------------|
| 561752 | F | Sidamo Re Lower Than   | 0 | 60  | N | Pass        |
| 561773 | F | Amhara Re Lower Than   | 0 | 120 | N | Withdrawn   |
| 561798 | F | Amhara Re HE Qualific  | 0 | 60  | N | Withdrawn   |
| 561979 | F | Addis Abak A Level or  | 0 | 120 | Y | Pass        |
| 562239 | F | South Regi Lower Than  | 0 | 60  | N | Pass        |
| 562769 | F | Sidamo Re A Level or   | 0 | 120 | N | Withdrawn   |
| 563027 | F | Oromia Re A Level or   | 0 | 60  | N | Pass        |
| 563302 | F | South Regi A Level or  | 0 | 60  | N | Pass        |
| 563820 | F | South Regi A Level or  | 0 | 60  | Y | Pass        |
| 564115 | F | Oromia Re Lower Than   | 0 | 60  | N | Distinction |
| 564278 | F | Sidamo Re Lower Than   | 0 | 120 | N | Pass        |
| 565182 | F | Afar Regio A Level or  | 1 | 60  | N | Pass        |
| 565273 | F | Sidamo Re A Level or   | 0 | 120 | N | Distinction |
| 565575 | F | Somalia Re A Level or  | 0 | 60  | N | Pass        |
| 565576 | F | Amhara Re A Level or   | 0 | 60  | N | Pass        |
| 565599 | F | Sidamo Re HE Qualific  | 0 | 60  | N | Distinction |
| 568019 | F | South Regi Lower Than  | 0 | 60  | N | Pass        |
| 568232 | F | Sidamo Re A Level or   | 0 | 60  | N | Pass        |
| 568749 | F | Sidamo Re HE Qualific  | 0 | 60  | N | Pass        |
| 568775 | F | Somalia Re Lower Than  | 1 | 60  | N | Withdrawn   |
| 569157 | F | Addis Abak A Level or  | 0 | 180 | N | Withdrawn   |
| 569256 | F | Amhara Re Lower Than   | 0 | 60  | N | Withdrawn   |
| 569589 | F | Oromia Re Lower Than   | 0 | 60  | N | Pass        |
| 569981 | F | South Regi A Level or  | 0 | 60  | N | Pass        |
| 570275 | F | Afar Regio A Level or  | 0 | 120 | N | Pass        |
| 570484 | F | Addis Abak HE Qualific | 0 | 60  | N | Pass        |
| 570692 | F | North Regi A Level or  | 0 | 60  | N | Withdrawn   |
| 571334 | F | South Regi Lower Than  | 0 | 60  | N | Fail        |
| 571395 | F | Somalia Re A Level or  | 0 | 60  | Y | Fail        |
| 571641 | F | South Regi A Level or  | 0 | 120 | N | Distinction |
| 571868 | F | Somalia Re Lower Than  | 1 | 120 | N | Withdrawn   |
| 572032 | F | South Regi Lower Than  | 0 | 60  | N | Pass        |
| 572101 | F | Amhara Re Lower Than   | 0 | 60  | N | Pass        |
| 572106 | F | South Regi A Level or  | 0 | 90  | N | Fail        |
| 572119 | F | Somalia Re Lower Than  | 0 | 60  | N | Fail        |
| 572306 | F | Oromia Re A Level or   | 0 | 60  | N | Pass        |
| 572371 | F | Addis Abak A Level or  | 0 | 60  | N | Withdrawn   |
| 572395 | F | Amhara Re A Level or   | 0 | 60  | N | Pass        |
| 572496 | F | Amhara Re A Level or   | 0 | 60  | Y | Pass        |
| 572538 | F | Addis Abak Lower Than  | 0 | 60  | Y | Pass        |
| 573130 | F | Somalia Re A Level or  | 0 | 60  | Y | Pass        |
| 573131 | F | South Wes A Level or   | 0 | 60  | N | Fail        |
| 573159 | F | South Regi A Level or  | 1 | 120 | N | Fail        |
| 573252 | F | Oromia Re Lower Than   | 0 | 60  | N | Withdrawn   |
| 573297 | F | Tigrai Regi Lower Than | 0 | 60  | N | Pass        |
| 573534 | F | Afar Regio Lower Than  | 0 | 60  | N | Pass        |
| 573554 | F | Oromia Re Lower Than   | 0 | 120 | N | Withdrawn   |

|        |   |                          |   |     |   |             |
|--------|---|--------------------------|---|-----|---|-------------|
| 573713 | F | Addis Abat A Level or I  | 0 | 60  | N | Pass        |
| 573873 | F | Sidamo Re A Level or I   | 0 | 60  | N | Fail        |
| 573934 | F | Tigray Regi Lower Tha    | 0 | 60  | N | Pass        |
| 574031 | F | Somalia Re A Level or I  | 0 | 60  | N | Pass        |
| 574063 | F | Sidamo Re Lower Tha      | 0 | 60  | N | Pass        |
| 574244 | M | Afar Regi Lower Tha      | 0 | 60  | N | Fail        |
| 574253 | F | South Regi A Level or I  | 0 | 60  | N | Distinction |
| 574306 | F | Sidamo Re Lower Tha      | 0 | 120 | N | Withdrawn   |
| 574512 | F | South Regi A Level or I  | 0 | 60  | N | Pass        |
| 574841 | F | South Regi A Level or I  | 0 | 60  | N | Pass        |
| 574849 | F | Tigray Regi A Level or I | 1 | 60  | N | Pass        |
| 574865 | F | South Regi A Level or I  | 0 | 60  | N | Distinction |
| 575404 | F | Tigray Regi Lower Tha    | 0 | 120 | N | Fail        |
| 575630 | F | Somalia Re Lower Tha     | 2 | 120 | N | Pass        |
| 575892 | F | Sidamo Re HE Qualific    | 1 | 60  | Y | Withdrawn   |
| 576203 | F | Addis Abak HE Qualific   | 0 | 60  | N | Fail        |
| 576262 | F | Amhara Re A Level or I   | 0 | 60  | N | Withdrawn   |
| 576268 | F | South Wes Lower Tha      | 0 | 120 | N | Pass        |
| 576445 | F | Somalia Re Lower Tha     | 0 | 120 | Y | Withdrawn   |
| 576689 | F | Somalia Re A Level or I  | 0 | 60  | N | Distinction |
| 576913 | M | South Wes A Level or I   | 0 | 60  | N | Fail        |
| 576923 | F | Sidamo Re Lower Tha      | 0 | 60  | N | Pass        |
| 577354 | F | Tigray Regi HE Qualific  | 1 | 60  | N | Withdrawn   |
| 577467 | F | Tigray Regi A Level or I | 0 | 120 | N | Distinction |
| 577618 | F | Somalia Re HE Qualific   | 1 | 60  | N | Pass        |
| 577645 | F | Addis Abat A Level or I  | 1 | 60  | N | Distinction |
| 577728 | F | Sidamo Re A Level or I   | 0 | 60  | N | Fail        |
| 577743 | F | South Regi A Level or I  | 0 | 120 | N | Pass        |
| 577934 | M | Oromia Re HE Qualific    | 0 | 120 | N | Withdrawn   |
| 577965 | F | Sidamo Re A Level or I   | 1 | 120 | N | Distinction |
| 578132 | F | Addis Abak HE Qualific   | 0 | 60  | N | Pass        |
| 578418 | F | Afar Regi A Level or I   | 0 | 60  | N | Withdrawn   |
| 578439 | F | Sidamo Re Lower Tha      | 0 | 60  | N | Pass        |
| 578445 | F | South Regi Lower Tha     | 0 | 90  | N | Withdrawn   |
| 578551 | F | Oromia Re A Level or I   | 0 | 60  | Y | Pass        |
| 578710 | F | South Wes Lower Tha      | 0 | 60  | N | Pass        |
| 578861 | F | Oromia Re A Level or I   | 0 | 60  | N | Pass        |
| 579031 | F | South Regi A Level or I  | 0 | 180 | N | Withdrawn   |
| 579161 | F | Amhara Re Lower Tha      | 0 | 60  | N | Pass        |
| 579201 | F | Sidamo Re A Level or I   | 0 | 60  | N | Withdrawn   |
| 579251 | M | Tigray Regi Lower Tha    | 0 | 60  | N | Fail        |
| 579409 | F | Addis Abak Lower Tha     | 0 | 60  | N | Pass        |
| 579486 | M | Addis Abak Lower Tha     | 1 | 60  | N | Fail        |
| 581016 | F | Oromia Re Lower Tha      | 1 | 60  | N | Pass        |
| 581118 | F | Addis Abat A Level or I  | 0 | 60  | N | Pass        |
| 581178 | F | Amhara Re Lower Tha      | 0 | 60  | N | Pass        |
| 581235 | F | South Regi Lower Tha     | 1 | 60  | N | Pass        |

|        |   |                          |   |     |   |             |
|--------|---|--------------------------|---|-----|---|-------------|
| 581672 | F | South Regi Lower Tha     | 1 | 60  | N | Withdrawn   |
| 581866 | F | Afar Regio HE Qualific   | 0 | 60  | N | Pass        |
| 581877 | F | Sidamo Re Lower Tha      | 0 | 60  | Y | Pass        |
| 582040 | F | Oromia Re A Level or I   | 0 | 60  | N | Pass        |
| 582253 | F | North Regi A Level or I  | 0 | 60  | N | Pass        |
| 582348 | F | Afar Regio A Level or I  | 0 | 90  | N | Fail        |
| 582460 | F | Addis Abak A Level or I  | 0 | 60  | Y | Pass        |
| 582694 | F | South Regi Lower Tha     | 0 | 60  | Y | Withdrawn   |
| 582709 | F | Addis Abak Lower Tha     | 0 | 60  | N | Pass        |
| 582816 | F | South Regi A Level or I  | 0 | 120 | N | Fail        |
| 582898 | F | Sidamo Re A Level or I   | 0 | 60  | N | Pass        |
| 582933 | M | Somalia Re Lower Tha     | 0 | 60  | N | Withdrawn   |
| 582964 | F | Afar Regio Lower Tha     | 0 | 60  | N | Pass        |
| 583179 | F | Sidamo Re Lower Tha      | 1 | 60  | N | Withdrawn   |
| 583775 | M | South Regi Lower Tha     | 0 | 120 | N | Pass        |
| 583843 | F | Afar Regio Lower Tha     | 2 | 60  | N | Distinction |
| 583954 | F | Sidamo Re A Level or I   | 0 | 60  | N | Pass        |
| 584274 | F | Sidamo Re A Level or I   | 0 | 120 | N | Withdrawn   |
| 584283 | F | Sidamo Re A Level or I   | 0 | 120 | N | Withdrawn   |
| 584509 | F | Somalia Re A Level or I  | 0 | 120 | N | Pass        |
| 584539 | F | Afar Regio HE Qualific   | 0 | 60  | N | Pass        |
| 584595 | F | North Regi A Level or I  | 0 | 60  | N | Withdrawn   |
| 584664 | F | Oromia Re Lower Tha      | 0 | 120 | Y | Withdrawn   |
| 584733 | F | South Wes Lower Tha      | 0 | 60  | N | Distinction |
| 584864 | F | South Wes A Level or I   | 0 | 120 | N | Pass        |
| 585074 | F | Sidamo Re Lower Tha      | 1 | 60  | N | Fail        |
| 585762 | F | Tigrai Regi A Level or I | 0 | 60  | N | Pass        |
| 585963 | F | Somalia Re A Level or I  | 1 | 60  | Y | Withdrawn   |
| 586036 | F | South Wes A Level or I   | 0 | 60  | N | Pass        |
| 586134 | F | Sidamo Re Lower Tha      | 0 | 60  | N | Pass        |
| 586142 | F | Somalia Re A Level or I  | 0 | 60  | N | Distinction |
| 586180 | F | Amhara Re A Level or I   | 0 | 60  | N | Pass        |
| 586376 | F | South Wes Lower Tha      | 0 | 60  | N | Pass        |
| 586398 | F | South Regi A Level or I  | 0 | 120 | N | Withdrawn   |
| 586502 | F | South Regi Lower Tha     | 0 | 60  | N | Pass        |
| 586516 | F | Oromia Re A Level or I   | 1 | 60  | N | Distinction |
| 586561 | F | Tigrai Regi Lower Tha    | 0 | 90  | Y | Withdrawn   |
| 586652 | F | Oromia Re HE Qualific    | 0 | 90  | N | Pass        |
| 586818 | F | Addis Abak Lower Tha     | 0 | 60  | Y | Fail        |
| 587037 | M | Oromia Re HE Qualific    | 0 | 120 | N | Withdrawn   |
| 587054 | F | Tigrai Regi HE Qualific  | 0 | 60  | N | Pass        |
| 587434 | F | Amhara Re Lower Tha      | 0 | 60  | N | Withdrawn   |
| 587459 | F | Tigrai Regi Lower Tha    | 0 | 60  | N | Pass        |
| 587860 | F | North Regi A Level or I  | 0 | 120 | N | Pass        |
| 588062 | F | Sidamo Re Lower Tha      | 0 | 120 | N | Withdrawn   |
| 588166 | F | Amhara Re A Level or I   | 0 | 60  | N | Withdrawn   |
| 588207 | F | South Wes Lower Tha      | 2 | 60  | N | Fail        |

|        |   |                          |   |     |   |             |
|--------|---|--------------------------|---|-----|---|-------------|
| 588251 | M | North Regi A Level or l  | 0 | 60  | N | Fail        |
| 588944 | M | Amhara Re A Level or l   | 0 | 60  | N | Pass        |
| 588991 | M | Sidamo Re A Level or l   | 0 | 120 | N | Fail        |
| 589133 | F | South Regi Lower Thar    | 0 | 60  | N | Pass        |
| 589554 | F | Sidamo Re A Level or l   | 0 | 60  | N | Pass        |
| 589621 | F | Oromia Re A Level or l   | 0 | 60  | N | Pass        |
| 589935 | F | Sidamo Re A Level or l   | 0 | 120 | N | Withdrawn   |
| 589968 | F | Somalia Re Lower Thar    | 0 | 60  | N | Withdrawn   |
| 590086 | F | Afar Regioi A Level or l | 0 | 60  | N | Pass        |
| 590122 | F | Afar Regioi A Level or l | 0 | 60  | N | Pass        |
| 590416 | F | Sidamo Re HE Qualific    | 1 | 60  | N | Fail        |
| 590444 | F | South Regi A Level or l  | 0 | 60  | N | Withdrawn   |
| 590593 | F | Amhara Re Lower Thar     | 0 | 60  | N | Withdrawn   |
| 590668 | F | Sidamo Re Lower Thar     | 1 | 120 | N | Pass        |
| 590764 | F | Addis Abat Lower Thar    | 0 | 60  | N | Withdrawn   |
| 590854 | F | North Regi HE Qualific   | 0 | 120 | N | Distinction |
| 590867 | M | Sidamo Re A Level or l   | 1 | 90  | N | Withdrawn   |
| 591159 | M | South Regi Lower Thar    | 0 | 60  | Y | Withdrawn   |
| 591986 | M | South Regi Lower Thar    | 1 | 120 | N | Withdrawn   |
| 591999 | F | Sidamo Re A Level or l   | 0 | 60  | N | Withdrawn   |
| 592090 | F | Somalia Re A Level or l  | 0 | 120 | N | Withdrawn   |
| 592135 | F | Amhara Re Lower Thar     | 0 | 180 | N | Pass        |
| 592139 | F | Tigrai Regi A Level or l | 0 | 60  | N | Distinction |
| 592258 | F | Oromia Re Lower Thar     | 0 | 60  | N | Pass        |
| 592262 | M | South Wes Lower Thar     | 1 | 60  | N | Withdrawn   |
| 592733 | F | Addis Abat HE Qualific   | 0 | 120 | N | Pass        |
| 592815 | F | South Regi No Formal     | 1 | 60  | N | Withdrawn   |
| 593000 | M | Tigrai Regi A Level or l | 0 | 60  | N | Pass        |
| 593346 | F | Amhara Re Lower Thar     | 0 | 60  | N | Pass        |
| 593476 | F | Sidamo Re A Level or l   | 0 | 60  | N | Pass        |
| 593583 | M | Tigrai Regi Lower Thar   | 0 | 120 | N | Withdrawn   |
| 593791 | F | South Wes A Level or l   | 0 | 60  | N | Withdrawn   |
| 593819 | F | South Wes A Level or l   | 0 | 60  | N | Withdrawn   |
| 594083 | M | Sidamo Re Lower Thar     | 0 | 240 | N | Pass        |
| 594282 | F | Oromia Re A Level or l   | 0 | 120 | N | Distinction |
| 594872 | F | Addis Abat A Level or l  | 0 | 60  | N | Pass        |
| 595018 | F | Tigrai Regi HE Qualific  | 0 | 60  | N | Withdrawn   |
| 595130 | F | Tigrai Regi A Level or l | 0 | 60  | N | Pass        |
| 595137 | F | Sidamo Re A Level or l   | 1 | 60  | N | Fail        |
| 595365 | F | Oromia Re Lower Thar     | 0 | 60  | N | Pass        |
| 595421 | F | Oromia Re A Level or l   | 0 | 60  | N | Pass        |
| 595850 | M | South Regi Lower Thar    | 0 | 120 | N | Withdrawn   |
| 595892 | F | Addis Abat A Level or l  | 0 | 60  | N | Pass        |
| 596072 | F | South Regi A Level or l  | 0 | 60  | N | Withdrawn   |
| 596128 | F | Addis Abat Lower Thar    | 0 | 60  | N | Fail        |
| 596151 | F | South Regi A Level or l  | 0 | 60  | N | Fail        |
| 596496 | F | South Regi HE Qualific   | 0 | 180 | N | Withdrawn   |

|        |   |                          |   |     |   |             |
|--------|---|--------------------------|---|-----|---|-------------|
| 596513 | F | Sidamo Re Lower Tha      | 0 | 60  | N | Pass        |
| 596728 | F | Tigrai Regi A Level or I | 0 | 60  | N | Pass        |
| 596744 | F | South Regi HE Qualific   | 0 | 120 | N | Withdrawn   |
| 596988 | F | South Regi Lower Tha     | 1 | 60  | Y | Pass        |
| 597532 | F | South Wes Lower Tha      | 1 | 120 | N | Withdrawn   |
| 597539 | F | South Regi Lower Tha     | 0 | 60  | N | Fail        |
| 597744 | F | North Regi Lower Tha     | 1 | 60  | N | Withdrawn   |
| 597853 | F | Afar Regi A Level or I   | 0 | 60  | N | Withdrawn   |
| 598035 | F | Somalia Re Lower Tha     | 0 | 60  | N | Pass        |
| 598201 | F | Tigrai Regi Lower Tha    | 0 | 60  | N | Pass        |
| 598282 | F | South Wes Lower Tha      | 1 | 60  | N | Pass        |
| 598313 | M | Sidamo Re A Level or I   | 1 | 120 | N | Pass        |
| 598317 | F | Somalia Re A Level or I  | 0 | 120 | N | Withdrawn   |
| 598395 | F | Tigrai Regi Lower Tha    | 0 | 60  | Y | Withdrawn   |
| 598581 | F | Sidamo Re A Level or I   | 0 | 60  | N | Pass        |
| 598769 | F | Tigrai Regi Lower Tha    | 2 | 180 | N | Fail        |
| 598837 | F | Tigrai Regi Lower Tha    | 0 | 60  | N | Pass        |
| 599108 | F | Tigrai Regi A Level or I | 0 | 60  | N | Fail        |
| 599232 | F | South Wes A Level or I   | 0 | 60  | N | Withdrawn   |
| 599323 | F | Somalia Re A Level or I  | 0 | 60  | Y | Fail        |
| 599355 | F | Addis Abak A Level or I  | 0 | 120 | N | Pass        |
| 599644 | F | Tigrai Regi Lower Tha    | 1 | 60  | Y | Withdrawn   |
| 600387 | F | North Regi A Level or I  | 0 | 60  | N | Distinction |
| 600398 | F | Addis Abak A Level or I  | 0 | 60  | N | Pass        |
| 600404 | F | Amhara Re Lower Tha      | 0 | 60  | N | Fail        |
| 600415 | F | South Wes A Level or I   | 0 | 60  | N | Pass        |
| 600428 | F | Oromia Re A Level or I   | 1 | 60  | N | Pass        |
| 600463 | F | South Regi A Level or I  | 0 | 60  | Y | Pass        |
| 600606 | F | South Regi Lower Tha     | 0 | 60  | Y | Pass        |
| 600658 | F | Tigrai Regi Lower Tha    | 2 | 120 | N | Fail        |
| 600664 | F | Sidamo Re Lower Tha      | 0 | 60  | N | Pass        |
| 601247 | M | Afar Regi HE Qualific    | 0 | 60  | N | Pass        |
| 601285 | F | Amhara Re A Level or I   | 0 | 60  | Y | Withdrawn   |
| 601316 | F | South Wes Lower Tha      | 1 | 60  | N | Withdrawn   |
| 601706 | F | Addis Abak A Level or I  | 1 | 120 | Y | Pass        |
| 601803 | F | North Regi A Level or I  | 0 | 120 | N | Fail        |
| 601874 | F | Tigrai Regi Lower Tha    | 0 | 60  | N | Fail        |
| 601882 | F | South Wes A Level or I   | 0 | 120 | Y | Withdrawn   |
| 601930 | F | South Regi Lower Tha     | 0 | 60  | N | Withdrawn   |
| 601983 | F | South Wes A Level or I   | 0 | 60  | N | Withdrawn   |
| 602109 | F | South Wes Lower Tha      | 0 | 60  | N | Fail        |
| 602448 | F | South Wes A Level or I   | 1 | 60  | N | Fail        |
| 602471 | M | Sidamo Re Lower Tha      | 0 | 60  | N | Pass        |
| 602570 | F | Addis Abak A Level or I  | 2 | 120 | N | Fail        |
| 602666 | F | Oromia Re A Level or I   | 1 | 90  | Y | Pass        |
| 602696 | F | Somalia Re A Level or I  | 0 | 60  | N | Distinction |
| 602779 | F | Sidamo Re No Formal      | 0 | 300 | N | Pass        |

|        |   |                          |   |     |   |             |
|--------|---|--------------------------|---|-----|---|-------------|
| 602865 | F | Sidamo Re A Level or I   | 0 | 60  | N | Pass        |
| 602943 | M | Addis Abak Lower Tha     | 1 | 60  | N | Distinction |
| 603055 | F | Tigrai Regi A Level or I | 0 | 60  | N | Pass        |
| 603113 | F | Oromia Re A Level or I   | 1 | 60  | Y | Pass        |
| 603121 | F | South Wes Lower Tha      | 0 | 60  | N | Fail        |
| 603200 | F | Addis Abak Lower Tha     | 0 | 60  | N | Pass        |
| 603203 | F | Oromia Re A Level or I   | 0 | 120 | N | Withdrawn   |
| 603580 | F | Oromia Re Lower Tha      | 0 | 120 | N | Pass        |
| 603731 | M | Afar Regio A Level or I  | 0 | 60  | N | Pass        |
| 603746 | F | Sidamo Re A Level or I   | 0 | 60  | N | Pass        |
| 603921 | F | Somalia Re Lower Tha     | 0 | 180 | N | Pass        |
| 604358 | F | South Regi A Level or I  | 0 | 60  | N | Pass        |
| 604725 | F | Addis Abak A Level or I  | 0 | 60  | N | Distinction |
| 604950 | F | Sidamo Re Lower Tha      | 0 | 60  | N | Pass        |
| 604990 | F | Addis Abak Lower Tha     | 0 | 120 | N | Pass        |
| 605068 | F | South Wes A Level or I   | 0 | 60  | N | Pass        |
| 605089 | F | South Regi A Level or I  | 0 | 180 | Y | Pass        |
| 605186 | F | Sidamo Re Lower Tha      | 0 | 120 | N | Fail        |
| 605243 | F | Addis Abak HE Qualific   | 0 | 60  | N | Pass        |
| 605383 | F | North Regi A Level or I  | 0 | 180 | N | Withdrawn   |
| 605770 | F | Tigrai Regi A Level or I | 0 | 120 | N | Pass        |
| 605771 | F | South Regi A Level or I  | 1 | 60  | Y | Pass        |
| 605901 | F | South Regi A Level or I  | 0 | 60  | Y | Withdrawn   |
| 606004 | F | Sidamo Re Lower Tha      | 0 | 120 | N | Withdrawn   |
| 606027 | F | South Wes Lower Tha      | 0 | 60  | Y | Pass        |
| 606105 | F | South Regi A Level or I  | 0 | 60  | N | Pass        |
| 606134 | F | Addis Abak A Level or I  | 0 | 60  | N | Pass        |
| 606239 | F | Afar Regio HE Qualific   | 0 | 60  | N | Pass        |
| 606391 | F | Sidamo Re Lower Tha      | 0 | 60  | N | Pass        |
| 606442 | F | Addis Abak A Level or I  | 0 | 60  | N | Pass        |
| 606517 | F | Somalia Re A Level or I  | 0 | 60  | N | Pass        |
| 606531 | F | Sidamo Re HE Qualific    | 0 | 120 | Y | Fail        |
| 606535 | M | South Regi Lower Tha     | 0 | 60  | N | Pass        |
| 606586 | F | Sidamo Re A Level or I   | 0 | 60  | N | Pass        |
| 606861 | F | Sidamo Re A Level or I   | 0 | 60  | N | Pass        |
| 606864 | F | Oromia Re HE Qualific    | 0 | 60  | N | Pass        |
| 606914 | F | Oromia Re A Level or I   | 0 | 120 | N | Withdrawn   |
| 607062 | F | Afar Regio Lower Tha     | 1 | 120 | N | Pass        |
| 607176 | F | South Wes A Level or I   | 0 | 60  | N | Withdrawn   |
| 607603 | F | South Regi A Level or I  | 1 | 60  | N | Pass        |
| 607923 | F | Tigrai Regi HE Qualific  | 0 | 120 | N | Distinction |
| 608068 | F | South Regi A Level or I  | 0 | 120 | N | Withdrawn   |
| 608134 | F | Tigrai Regi Lower Tha    | 0 | 60  | N | Pass        |
| 608195 | F | South Regi Lower Tha     | 0 | 60  | N | Fail        |
| 608319 | F | Addis Abak Lower Tha     | 1 | 60  | Y | Withdrawn   |
| 608448 | F | Oromia Re A Level or I   | 0 | 60  | N | Distinction |
| 608851 | F | Afar Regio HE Qualific   | 0 | 60  | N | Pass        |

|        |   |                         |   |     |   |             |
|--------|---|-------------------------|---|-----|---|-------------|
| 609194 | F | Sidamo Re Lower Than    | 1 | 90  | N | Pass        |
| 609203 | F | South Regi Lower Than   | 0 | 60  | N | Fail        |
| 609403 | F | Somalia Re Lower Than   | 0 | 60  | N | Pass        |
| 609927 | M | Afar Region A Level or  | 1 | 60  | N | Pass        |
| 610385 | F | Addis Abat A Level or   | 0 | 60  | Y | Pass        |
| 610405 | F | Amhara Re A Level or    | 0 | 60  | N | Pass        |
| 610437 | F | Amhara Re Lower Than    | 0 | 120 | N | Withdrawn   |
| 610470 | F | Sidamo Re Post Gradu    | 0 | 60  | N | Pass        |
| 610494 | F | Tigrai Regi Lower Than  | 1 | 60  | N | Withdrawn   |
| 610545 | F | South Wes A Level or    | 0 | 60  | N | Pass        |
| 611241 | F | Somalia Re Lower Than   | 0 | 60  | N | Pass        |
| 611268 | F | Amhara Re A Level or    | 1 | 60  | N | Distinction |
| 611275 | M | South Regi A Level or   | 0 | 60  | N | Withdrawn   |
| 611329 | F | Sidamo Re HE Qualific   | 0 | 60  | N | Pass        |
| 611821 | F | Sidamo Re HE Qualific   | 0 | 60  | N | Pass        |
| 612135 | F | South Regi A Level or   | 0 | 60  | N | Distinction |
| 612230 | F | Oromia Re Lower Than    | 0 | 120 | N | Pass        |
| 612247 | F | Oromia Re Lower Than    | 0 | 60  | N | Pass        |
| 612337 | F | Amhara Re A Level or    | 0 | 120 | N | Withdrawn   |
| 612473 | F | Addis Abat A Level or   | 1 | 60  | N | Withdrawn   |
| 612566 | F | Oromia Re Lower Than    | 0 | 60  | N | Pass        |
| 612750 | F | South Wes Lower Than    | 1 | 60  | Y | Pass        |
| 613102 | F | Amhara Re A Level or    | 0 | 60  | N | Pass        |
| 613135 | M | South Wes A Level or    | 0 | 60  | N | Fail        |
| 613380 | F | North Regi Lower Than   | 0 | 60  | N | Fail        |
| 613909 | F | Somalia Re Lower Than   | 0 | 60  | N | Pass        |
| 614159 | F | Addis Abat A Level or   | 0 | 60  | N | Pass        |
| 614405 | M | Addis Abat A Level or   | 0 | 60  | N | Withdrawn   |
| 615016 | F | Oromia Re Lower Than    | 1 | 120 | N | Withdrawn   |
| 615165 | F | Tigrai Regi A Level or  | 1 | 180 | Y | Withdrawn   |
| 615263 | F | Oromia Re A Level or    | 0 | 60  | N | Withdrawn   |
| 616660 | F | Afar Region HE Qualific | 0 | 60  | N | Pass        |
| 617297 | F | Tigrai Regi Lower Than  | 1 | 150 | N | Pass        |
| 617521 | F | Addis Abat A Level or   | 0 | 60  | N | Pass        |
| 617525 | F | Sidamo Re A Level or    | 1 | 60  | N | Pass        |
| 617530 | M | South Wes A Level or    | 0 | 60  | N | Pass        |
| 617671 | F | South Wes A Level or    | 0 | 60  | N | Withdrawn   |
| 617804 | M | South Wes A Level or    | 0 | 120 | N | Withdrawn   |
| 617811 | F | Sidamo Re No Formal     | 0 | 120 | N | Withdrawn   |
| 618197 | F | Oromia Re Lower Than    | 1 | 60  | N | Pass        |
| 618589 | F | South Wes Lower Than    | 0 | 60  | N | Fail        |
| 618734 | F | Somalia Re Lower Than   | 0 | 120 | N | Withdrawn   |
| 618858 | F | Sidamo Re Lower Than    | 1 | 60  | N | Withdrawn   |
| 618960 | F | South Regi Lower Than   | 0 | 60  | N | Fail        |
| 618983 | F | Sidamo Re No Formal     | 0 | 150 | N | Fail        |
| 618994 | F | Tigrai Regi A Level or  | 0 | 60  | N | Pass        |
| 619052 | M | Addis Abat No Formal    | 0 | 60  | N | Fail        |



|        |   |                           |   |     |   |             |
|--------|---|---------------------------|---|-----|---|-------------|
| 619935 | F | South Wes HE Qualific     | 0 | 120 | N | Pass        |
| 620000 | F | Sidamo Re Lower Than      | 0 | 120 | N | Pass        |
| 620115 | F | Tigrai Regio Lower Than   | 0 | 60  | N | Fail        |
| 620135 | F | Addis Abak A Level or l   | 0 | 120 | N | Withdrawn   |
| 620550 | F | Sidamo Re A Level or l    | 0 | 60  | N | Fail        |
| 620655 | F | Somalia Re A Level or l   | 1 | 120 | N | Withdrawn   |
| 620698 | F | Somalia Re A Level or l   | 0 | 60  | N | Pass        |
| 621487 | F | Tigrai Regio Lower Than   | 1 | 60  | N | Pass        |
| 621826 | F | Tigrai Regio A Level or l | 1 | 60  | N | Pass        |
| 621856 | F | Amhara Re A Level or l    | 0 | 60  | N | Fail        |
| 621899 | F | Tigrai Regio Lower Than   | 1 | 60  | N | Withdrawn   |
| 621935 | M | Oromia Re HE Qualific     | 0 | 120 | N | Withdrawn   |
| 622007 | F | Addis Abak A Level or l   | 0 | 60  | N | Fail        |
| 622117 | F | Sidamo Re A Level or l    | 0 | 60  | N | Withdrawn   |
| 622313 | F | Sidamo Re Lower Than      | 0 | 60  | N | Pass        |
| 622573 | F | Tigrai Regio Lower Than   | 0 | 120 | Y | Pass        |
| 622722 | F | Oromia Re Lower Than      | 0 | 60  | N | Withdrawn   |
| 623042 | F | South Regi A Level or l   | 1 | 60  | N | Fail        |
| 623097 | F | Amhara Re A Level or l    | 0 | 60  | N | Pass        |
| 623319 | M | Amhara Re HE Qualific     | 0 | 180 | N | Withdrawn   |
| 623376 | F | South Wes A Level or l    | 0 | 60  | N | Pass        |
| 623441 | F | Sidamo Re A Level or l    | 0 | 60  | N | Pass        |
| 623519 | F | South Wes A Level or l    | 1 | 60  | N | Pass        |
| 623648 | F | Sidamo Re A Level or l    | 0 | 60  | N | Pass        |
| 623689 | F | North Regi Lower Than     | 0 | 60  | N | Pass        |
| 624342 | F | Addis Abak A Level or l   | 0 | 90  | N | Pass        |
| 624709 | F | Amhara Re Lower Than      | 1 | 60  | N | Fail        |
| 624795 | F | North Regi No Formal      | 0 | 120 | N | Withdrawn   |
| 625666 | F | Addis Abak A Level or l   | 0 | 60  | N | Pass        |
| 625709 | F | Somalia Re A Level or l   | 0 | 90  | N | Fail        |
| 625826 | F | Tigrai Regio A Level or l | 0 | 60  | N | Distinction |
| 626012 | M | Sidamo Re A Level or l    | 0 | 60  | N | Pass        |
| 626075 | M | Afar Regio Lower Than     | 1 | 120 | N | Pass        |
| 626139 | F | South Regi A Level or l   | 0 | 60  | N | Pass        |
| 626159 | F | South Wes Lower Than      | 0 | 60  | Y | Pass        |
| 626195 | F | Afar Regio Lower Than     | 0 | 60  | N | Distinction |
| 626210 | F | Oromia Re Lower Than      | 0 | 135 | N | Fail        |
| 626597 | F | South Regi A Level or l   | 1 | 60  | N | Withdrawn   |
| 626646 | F | Sidamo Re Lower Than      | 0 | 60  | N | Distinction |
| 626660 | F | South Wes Lower Than      | 0 | 120 | N | Withdrawn   |
| 626740 | F | Tigrai Regio HE Qualific  | 1 | 120 | N | Pass        |
| 626835 | F | South Wes Lower Than      | 0 | 60  | N | Withdrawn   |
| 627119 | F | Addis Abak No Formal      | 1 | 60  | N | Withdrawn   |
| 627269 | F | Amhara Re No Formal       | 0 | 60  | N | Pass        |
| 627563 | M | Oromia Re HE Qualific     | 0 | 120 | N | Pass        |
| 627660 | F | Somalia Re HE Qualific    | 0 | 60  | N | Fail        |
| 627968 | F | Addis Abak Lower Than     | 0 | 300 | Y | Fail        |

|        |   |                          |   |     |   |             |
|--------|---|--------------------------|---|-----|---|-------------|
| 628388 | M | Addis Abat HE Qualific   | 0 | 120 | N | Pass        |
| 628435 | F | Amhara Re A Level or I   | 0 | 60  | N | Withdrawn   |
| 628656 | F | Afar Region HE Qualific  | 0 | 60  | N | Pass        |
| 628679 | F | South Regi A Level or I  | 0 | 60  | N | Pass        |
| 628819 | F | South Regi A Level or I  | 0 | 120 | N | Withdrawn   |
| 628991 | F | Amhara Re A Level or I   | 0 | 60  | N | Pass        |
| 629053 | F | Sidamo Re A Level or I   | 0 | 120 | N | Pass        |
| 629127 | F | Addis Abak A Level or I  | 0 | 60  | N | Pass        |
| 629245 | F | Addis Abak A Level or I  | 0 | 60  | N | Pass        |
| 629553 | F | Sidamo Re A Level or I   | 0 | 60  | N | Pass        |
| 630274 | M | Amhara Re HE Qualific    | 1 | 60  | N | Fail        |
| 630286 | F | Afar Region Lower Than   | 0 | 120 | N | Fail        |
| 630343 | F | Sidamo Re Lower Than     | 1 | 120 | N | Withdrawn   |
| 630404 | F | Sidamo Re Lower Than     | 0 | 60  | N | Pass        |
| 630465 | M | Somalia Re Lower Than    | 0 | 60  | N | Withdrawn   |
| 630597 | F | South Regi Lower Than    | 0 | 60  | N | Pass        |
| 630697 | F | Addis Abak A Level or I  | 0 | 60  | N | Pass        |
| 630716 | F | Sidamo Re No Formal      | 0 | 90  | N | Fail        |
| 630773 | F | Tigrai Regi Lower Than   | 0 | 60  | N | Fail        |
| 630834 | F | South Regi A Level or I  | 0 | 120 | N | Pass        |
| 631230 | F | Sidamo Re A Level or I   | 0 | 60  | N | Pass        |
| 631248 | M | Sidamo Re Lower Than     | 0 | 120 | N | Pass        |
| 631266 | F | Oromia Re Lower Than     | 0 | 75  | N | Fail        |
| 631416 | F | Sidamo Re A Level or I   | 0 | 60  | N | Pass        |
| 631561 | F | South Regi A Level or I  | 1 | 120 | Y | Fail        |
| 631640 | M | Tigrai Regi A Level or I | 0 | 60  | N | Pass        |
| 631775 | F | Sidamo Re A Level or I   | 0 | 60  | N | Fail        |
| 631954 | F | South Regi Lower Than    | 0 | 120 | N | Pass        |
| 632144 | F | South Regi HE Qualific   | 1 | 60  | N | Withdrawn   |
| 632255 | M | South Regi Lower Than    | 1 | 120 | N | Withdrawn   |
| 632281 | F | Amhara Re A Level or I   | 0 | 60  | N | Pass        |
| 632431 | F | South Wes Lower Than     | 1 | 60  | N | Withdrawn   |
| 632473 | F | Afar Region A Level or I | 0 | 120 | N | Fail        |
| 632605 | F | South Regi A Level or I  | 1 | 60  | N | Fail        |
| 632632 | F | South Wes HE Qualific    | 1 | 60  | N | Pass        |
| 632722 | F | South Regi Lower Than    | 0 | 60  | N | Withdrawn   |
| 632955 | M | Sidamo Re A Level or I   | 0 | 60  | N | Pass        |
| 633016 | M | South Regi A Level or I  | 1 | 60  | N | Withdrawn   |
| 633206 | F | Sidamo Re Lower Than     | 0 | 60  | N | Fail        |
| 633902 | F | Sidamo Re HE Qualific    | 0 | 60  | N | Pass        |
| 633949 | F | South Regi A Level or I  | 0 | 60  | N | Distinction |
| 634247 | F | Addis Abak A Level or I  | 0 | 60  | N | Fail        |
| 634636 | M | Sidamo Re A Level or I   | 0 | 60  | N | Pass        |
| 634772 | F | North Regi Lower Than    | 0 | 120 | N | Pass        |
| 635251 | F | Sidamo Re HE Qualific    | 0 | 60  | N | Withdrawn   |
| 635328 | M | Sidamo Re Lower Than     | 0 | 90  | N | Fail        |
| 635425 | F | South Regi Lower Than    | 0 | 60  | N | Withdrawn   |

|        |   |                            |   |     |   |             |
|--------|---|----------------------------|---|-----|---|-------------|
| 635452 | F | Afar Region HE Qualific    | 0 | 60  | N | Pass        |
| 635561 | F | Afar Region A Level or I   | 0 | 60  | N | Fail        |
| 635716 | F | South Wes A Level or I     | 0 | 60  | N | Withdrawn   |
| 635777 | F | Tigray Region A Level or I | 1 | 60  | N | Pass        |
| 635890 | F | Afar Region A Level or I   | 0 | 120 | N | Fail        |
| 635921 | M | Addis Abab A Level or I    | 0 | 120 | N | Pass        |
| 635924 | F | Addis Abab A Level or I    | 0 | 60  | N | Pass        |
| 636064 | F | South Regi HE Qualific     | 0 | 60  | N | Withdrawn   |
| 636302 | F | Afar Region A Level or I   | 0 | 60  | Y | Pass        |
| 636525 | F | Afar Region A Level or I   | 0 | 60  | N | Pass        |
| 636660 | F | Amhara Re Lower Than       | 0 | 60  | N | Withdrawn   |
| 636807 | F | South Wes Lower Than       | 0 | 60  | N | Withdrawn   |
| 636953 | F | Oromia Re HE Qualific      | 0 | 120 | N | Fail        |
| 637003 | F | Oromia Re Lower Than       | 0 | 60  | N | Pass        |
| 637063 | F | South Regi A Level or I    | 0 | 60  | N | Pass        |
| 637238 | F | Oromia Re HE Qualific      | 0 | 120 | N | Pass        |
| 637279 | F | Oromia Re Lower Than       | 0 | 120 | N | Pass        |
| 637295 | F | Sidamo Re A Level or I     | 0 | 120 | Y | Withdrawn   |
| 637348 | F | Amhara Re A Level or I     | 0 | 120 | N | Fail        |
| 637370 | F | Afar Region A Level or I   | 0 | 60  | N | Pass        |
| 637382 | M | Somalia Re HE Qualific     | 0 | 120 | N | Pass        |
| 637388 | F | South Regi Lower Than      | 0 | 60  | N | Fail        |
| 637414 | F | South Regi A Level or I    | 0 | 60  | N | Distinction |
| 637586 | F | South Regi A Level or I    | 0 | 60  | N | Distinction |
| 637715 | M | South Regi Lower Than      | 0 | 60  | N | Pass        |
| 637810 | F | Addis Abab Lower Than      | 0 | 60  | N | Pass        |
| 637815 | F | Tigray Region HE Qualific  | 0 | 60  | N | Distinction |
| 637820 | F | Tigray Region Lower Than   | 0 | 90  | N | Fail        |
| 637867 | F | Tigray Region Lower Than   | 0 | 60  | N | Fail        |
| 637903 | F | Tigray Region Lower Than   | 0 | 60  | N | Pass        |
| 638036 | F | Sidamo Re Lower Than       | 0 | 120 | N | Withdrawn   |
| 638417 | F | South Wes A Level or I     | 0 | 120 | N | Withdrawn   |
| 638516 | F | Sidamo Re HE Qualific      | 0 | 60  | N | Distinction |
| 638544 | F | South Regi A Level or I    | 0 | 120 | N | Withdrawn   |
| 638554 | F | Addis Abab HE Qualific     | 0 | 60  | N | Withdrawn   |
| 638575 | F | Amhara Re HE Qualific      | 0 | 120 | N | Withdrawn   |
| 638756 | F | Sidamo Re A Level or I     | 0 | 120 | N | Pass        |
| 638818 | F | South Regi A Level or I    | 0 | 120 | N | Withdrawn   |
| 638997 | F | Afar Region Lower Than     | 0 | 60  | Y | Pass        |
| 639659 | F | Somalia Re A Level or I    | 0 | 120 | N | Withdrawn   |
| 639663 | F | South Wes Lower Than       | 0 | 60  | N | Pass        |
| 639724 | F | Somalia Re Lower Than      | 0 | 90  | N | Distinction |
| 640225 | F | Tigray Region Lower Than   | 0 | 60  | N | Pass        |
| 640265 | F | Oromia Re A Level or I     | 0 | 180 | N | Withdrawn   |
| 640289 | F | Sidamo Re A Level or I     | 0 | 60  | N | Withdrawn   |
| 640291 | F | North Regi Lower Than      | 0 | 120 | N | Withdrawn   |
| 640330 | M | South Regi Lower Than      | 0 | 60  | N | Withdrawn   |

|        |   |                          |   |     |   |             |
|--------|---|--------------------------|---|-----|---|-------------|
| 640425 | F | South Regi A Level or I  | 0 | 60  | N | Pass        |
| 640455 | M | South Wes A Level or I   | 0 | 60  | N | Fail        |
| 640501 | F | Sidamo Re A Level or I   | 0 | 120 | N | Withdrawn   |
| 640701 | M | South Wes Lower Tha      | 0 | 60  | N | Pass        |
| 640706 | F | Sidamo Re A Level or I   | 0 | 120 | N | Withdrawn   |
| 640712 | F | Amhara Re HE Qualific    | 0 | 120 | N | Withdrawn   |
| 640753 | M | Amhara Re Lower Tha      | 0 | 60  | N | Fail        |
| 641045 | F | North Regi Lower Tha     | 0 | 120 | N | Withdrawn   |
| 641262 | F | South Regi Lower Tha     | 0 | 60  | N | Withdrawn   |
| 641329 | F | Amhara Re A Level or I   | 0 | 60  | N | Fail        |
| 641540 | F | Somalia Re Lower Tha     | 0 | 120 | Y | Withdrawn   |
| 641616 | F | Tigrai Regi A Level or I | 0 | 60  | N | Pass        |
| 641795 | F | Afar Regio A Level or I  | 0 | 180 | N | Withdrawn   |
| 641840 | M | South Wes A Level or I   | 0 | 60  | N | Pass        |
| 641992 | F | Somalia Re A Level or I  | 0 | 60  | Y | Withdrawn   |
| 642067 | F | Oromia Re Lower Tha      | 0 | 60  | N | Pass        |
| 642075 | M | Tigrai Regi Lower Tha    | 0 | 60  | N | Fail        |
| 642083 | F | Oromia Re A Level or I   | 0 | 60  | N | Pass        |
| 642122 | F | Afar Regio HE Qualific   | 0 | 60  | N | Pass        |
| 642201 | F | Tigrai Regi Lower Tha    | 0 | 60  | N | Pass        |
| 642250 | F | Amhara Re Lower Tha      | 0 | 60  | N | Fail        |
| 642292 | F | Sidamo Re A Level or I   | 0 | 120 | N | Withdrawn   |
| 642405 | F | South Wes A Level or I   | 0 | 60  | N | Distinction |
| 642413 | F | South Wes Lower Tha      | 0 | 120 | N | Pass        |
| 642439 | F | South Wes Lower Tha      | 0 | 120 | N | Withdrawn   |
| 642550 | M | South Regi A Level or I  | 0 | 60  | N | Pass        |
| 642595 | F | South Regi A Level or I  | 0 | 60  | N | Pass        |
| 642600 | F | South Regi Lower Tha     | 0 | 90  | N | Pass        |
| 642633 | F | Afar Regio HE Qualific   | 0 | 60  | N | Fail        |
| 642698 | F | Somalia Re Lower Tha     | 0 | 60  | N | Pass        |
| 642731 | F | South Regi A Level or I  | 0 | 60  | N | Withdrawn   |
| 642802 | F | South Regi A Level or I  | 0 | 60  | N | Withdrawn   |
| 642834 | F | Oromia Re A Level or I   | 0 | 120 | N | Pass        |
| 642836 | F | South Regi HE Qualific   | 0 | 60  | N | Withdrawn   |
| 642988 | F | Sidamo Re Lower Tha      | 0 | 60  | N | Fail        |
| 643172 | F | Sidamo Re HE Qualific    | 0 | 120 | N | Pass        |
| 643208 | F | South Wes Lower Tha      | 0 | 60  | N | Pass        |
| 643321 | F | Amhara Re HE Qualific    | 0 | 120 | N | Distinction |
| 643354 | F | Tigrai Regi A Level or I | 0 | 60  | N | Pass        |
| 643587 | F | Tigrai Regi Lower Tha    | 0 | 60  | N | Pass        |
| 643608 | F | Somalia Re A Level or I  | 0 | 60  | Y | Withdrawn   |
| 643953 | M | South Wes Lower Tha      | 0 | 120 | Y | Fail        |
| 643986 | M | Sidamo Re Lower Tha      | 0 | 60  | N | Pass        |
| 644069 | F | Afar Regio A Level or I  | 0 | 60  | N | Pass        |
| 644101 | F | Addis Abat Lower Tha     | 0 | 60  | N | Withdrawn   |
| 644164 | F | Sidamo Re Lower Tha      | 0 | 90  | N | Pass        |
| 644172 | F | Tigrai Regi Lower Tha    | 0 | 60  | N | Pass        |

|        |   |                         |   |     |   |             |
|--------|---|-------------------------|---|-----|---|-------------|
| 644362 | F | South Regi A Level or I | 0 | 60  | N | Pass        |
| 644482 | F | South Regi Lower Tha    | 0 | 60  | N | Withdrawn   |
| 644484 | F | South Wes A Level or I  | 0 | 120 | N | Pass        |
| 644599 | F | Oromia Re HE Qualific   | 0 | 60  | N | Pass        |
| 644793 | F | Tigrai Regi Lower Tha   | 0 | 60  | N | Distinction |
| 644822 | F | Addis Abak A Level or I | 0 | 120 | N | Pass        |
| 644863 | F | Addis Abak A Level or I | 0 | 60  | N | Fail        |
| 644883 | F | Tigrai Regi Lower Tha   | 0 | 60  | N | Withdrawn   |
| 644975 | F | Addis Abak Lower Tha    | 0 | 60  | N | Withdrawn   |
| 644993 | F | Afar Regio HE Qualific  | 0 | 60  | N | Distinction |
| 645042 | F | South Wes Lower Tha     | 0 | 120 | N | Fail        |
| 645047 | F | Sidamo Re A Level or I  | 0 | 60  | N | Pass        |
| 645052 | F | South Regi Lower Tha    | 0 | 120 | N | Withdrawn   |
| 645098 | F | Afar Regio HE Qualific  | 0 | 60  | N | Pass        |
| 645183 | F | Sidamo Re Lower Tha     | 0 | 60  | N | Withdrawn   |
| 645248 | F | Addis Abak Lower Tha    | 0 | 60  | N | Withdrawn   |
| 645256 | F | Oromia Re HE Qualific   | 0 | 60  | N | Distinction |
| 645359 | F | Sidamo Re A Level or I  | 0 | 120 | N | Pass        |
| 645370 | F | Sidamo Re A Level or I  | 0 | 60  | N | Pass        |
| 645371 | F | Addis Abak Lower Tha    | 0 | 60  | N | Fail        |
| 645420 | F | Amhara Re Lower Tha     | 0 | 60  | N | Fail        |
| 645510 | F | South Regi Lower Tha    | 0 | 60  | N | Withdrawn   |
| 645639 | F | Sidamo Re Lower Tha     | 0 | 60  | N | Fail        |
| 645678 | M | South Wes A Level or I  | 0 | 120 | Y | Pass        |
| 645753 | F | Afar Regio Lower Tha    | 0 | 60  | N | Fail        |
| 645793 | F | Amhara Re Lower Tha     | 0 | 60  | N | Fail        |
| 645950 | F | South Wes Lower Tha     | 0 | 60  | N | Pass        |
| 645996 | M | South Regi A Level or I | 0 | 120 | N | Withdrawn   |
| 646004 | F | Amhara Re Lower Tha     | 0 | 60  | N | Withdrawn   |
| 646063 | F | Somalia Re A Level or I | 0 | 60  | N | Pass        |
| 646075 | F | Afar Regio HE Qualific  | 0 | 120 | N | Fail        |
| 646119 | F | South Wes Lower Tha     | 0 | 60  | N | Pass        |
| 646133 | F | Amhara Re Lower Tha     | 0 | 60  | N | Withdrawn   |
| 646151 | F | South Regi Lower Tha    | 0 | 60  | N | Withdrawn   |
| 646178 | F | South Regi A Level or I | 0 | 120 | N | Fail        |
| 646202 | F | Afar Regio HE Qualific  | 0 | 60  | N | Pass        |
| 646260 | F | Oromia Re Lower Tha     | 0 | 60  | N | Fail        |
| 646352 | F | Sidamo Re Lower Tha     | 0 | 60  | N | Fail        |
| 646415 | F | Sidamo Re A Level or I  | 0 | 120 | N | Fail        |
| 646418 | F | South Wes A Level or I  | 0 | 60  | N | Distinction |
| 646445 | F | South Regi A Level or I | 0 | 60  | N | Withdrawn   |
| 646455 | F | North Regi Lower Tha    | 0 | 60  | N | Withdrawn   |
| 646482 | F | North Regi Lower Tha    | 0 | 60  | N | Pass        |
| 646484 | F | Afar Regio A Level or I | 0 | 60  | N | Pass        |
| 646515 | M | North Regi Lower Tha    | 0 | 120 | N | Withdrawn   |
| 646579 | F | South Regi A Level or I | 0 | 60  | N | Pass        |
| 646580 | F | South Wes A Level or I  | 0 | 60  | N | Withdrawn   |

|        |   |                          |   |     |   |             |
|--------|---|--------------------------|---|-----|---|-------------|
| 646618 | F | South Regi A Level or I  | 0 | 120 | N | Distinction |
| 646636 | F | Sidamo Re Lower Tha      | 0 | 60  | N | Withdrawn   |
| 646659 | F | Amhara Re A Level or I   | 0 | 60  | N | Fail        |
| 646691 | F | South Wes Lower Tha      | 0 | 60  | N | Fail        |
| 646770 | F | South Regi A Level or I  | 0 | 60  | N | Withdrawn   |
| 646776 | F | South Regi A Level or I  | 0 | 60  | N | Pass        |
| 646781 | M | South Wes A Level or I   | 0 | 60  | N | Pass        |
| 646798 | F | South Regi A Level or I  | 0 | 60  | Y | Pass        |
| 646844 | F | Addis Abak A Level or I  | 0 | 120 | N | Pass        |
| 646852 | F | South Wes Lower Tha      | 0 | 60  | N | Withdrawn   |
| 646901 | M | Addis Abak Lower Tha     | 0 | 60  | N | Pass        |
| 646906 | M | South Regi Lower Tha     | 0 | 60  | N | Withdrawn   |
| 647056 | M | Sidamo Re Lower Tha      | 0 | 60  | N | Pass        |
| 647126 | F | North Regi Lower Tha     | 0 | 60  | N | Withdrawn   |
| 647200 | F | South Regi Lower Tha     | 0 | 60  | N | Fail        |
| 647220 | F | South Wes Lower Tha      | 0 | 120 | N | Withdrawn   |
| 647312 | F | Sidamo Re HE Qualific    | 0 | 120 | N | Withdrawn   |
| 647346 | F | South Wes A Level or I   | 0 | 60  | N | Distinction |
| 647385 | F | Addis Abak A Level or I  | 0 | 60  | N | Distinction |
| 647393 | F | South Regi HE Qualific   | 0 | 60  | N | Pass        |
| 647395 | F | Somalia Re A Level or I  | 0 | 60  | N | Distinction |
| 647502 | F | Somalia Re HE Qualific   | 0 | 60  | N | Pass        |
| 647511 | F | Tigrai Regi A Level or I | 0 | 60  | N | Fail        |
| 647553 | F | South Wes A Level or I   | 0 | 60  | N | Pass        |
| 647711 | M | South Wes Lower Tha      | 0 | 60  | N | Withdrawn   |
| 647740 | M | Sidamo Re A Level or I   | 0 | 60  | N | Withdrawn   |
| 647762 | F | Oromia Re Lower Tha      | 0 | 60  | N | Pass        |
| 647764 | F | Oromia Re Lower Tha      | 0 | 60  | N | Pass        |
| 647774 | F | Oromia Re Lower Tha      | 0 | 120 | N | Withdrawn   |
| 647803 | F | South Wes A Level or I   | 0 | 60  | N | Pass        |
| 647807 | F | South Wes Lower Tha      | 0 | 60  | N | Withdrawn   |
| 647864 | M | South Wes Lower Tha      | 0 | 120 | N | Withdrawn   |
| 647876 | F | Addis Abak Lower Tha     | 0 | 120 | N | Withdrawn   |
| 647883 | F | Sidamo Re A Level or I   | 0 | 60  | N | Pass        |
| 647940 | F | Somalia Re Lower Tha     | 0 | 60  | N | Withdrawn   |
| 647964 | F | South Regi Lower Tha     | 0 | 120 | N | Withdrawn   |
| 647967 | F | Sidamo Re Lower Tha      | 0 | 60  | N | Pass        |
| 647982 | F | Tigrai Regi A Level or I | 0 | 120 | N | Pass        |
| 647993 | F | Oromia Re Lower Tha      | 0 | 60  | N | Withdrawn   |
| 647999 | F | South Wes Lower Tha      | 0 | 60  | N | Withdrawn   |
| 648063 | F | Sidamo Re A Level or I   | 0 | 120 | N | Pass        |
| 648082 | F | Addis Abak Lower Tha     | 0 | 120 | N | Fail        |
| 648119 | F | Somalia Re Lower Tha     | 0 | 60  | N | Fail        |
| 648120 | M | South Regi A Level or I  | 0 | 60  | N | Withdrawn   |
| 648127 | F | Afar Regio A Level or I  | 0 | 120 | N | Withdrawn   |
| 648131 | F | Sidamo Re Lower Tha      | 0 | 60  | N | Fail        |
| 648135 | F | South Regi A Level or I  | 0 | 60  | N | Pass        |

|        |   |                         |   |     |   |             |
|--------|---|-------------------------|---|-----|---|-------------|
| 648182 | F | South Wes A Level or I  | 0 | 60  | N | Pass        |
| 648194 | F | Sidamo Re Lower Tha     | 0 | 60  | N | Pass        |
| 648201 | M | South Regi A Level or I | 0 | 60  | Y | Withdrawn   |
| 648203 | F | Sidamo Re A Level or I  | 0 | 60  | N | Withdrawn   |
| 648238 | F | Sidamo Re A Level or I  | 0 | 60  | N | Withdrawn   |
| 648247 | F | Addis Abak Lower Tha    | 0 | 120 | N | Withdrawn   |
| 648262 | F | Addis Abak Lower Tha    | 0 | 60  | N | Pass        |
| 648310 | F | Addis Abak Lower Tha    | 0 | 60  | N | Pass        |
| 648311 | F | South Regi Lower Tha    | 0 | 60  | N | Fail        |
| 648317 | F | South Regi No Formal    | 0 | 150 | N | Withdrawn   |
| 648335 | F | Sidamo Re Lower Tha     | 0 | 60  | N | Fail        |
| 648386 | F | North Regi Lower Tha    | 0 | 120 | N | Withdrawn   |
| 648391 | F | Afar Regio Lower Tha    | 0 | 60  | N | Fail        |
| 648416 | F | North Regi A Level or I | 0 | 60  | N | Pass        |
| 648449 | F | Addis Abak A Level or I | 0 | 60  | N | Distinction |
| 648476 | F | Addis Abak Lower Tha    | 0 | 60  | N | Pass        |
| 648487 | M | North Regi Lower Tha    | 0 | 60  | N | Pass        |
| 648519 | F | Tigrai Regi Lower Tha   | 0 | 180 | N | Withdrawn   |
| 648537 | M | Addis Abak HE Qualific  | 0 | 60  | N | Pass        |
| 648543 | F | North Regi Lower Tha    | 0 | 60  | N | Pass        |
| 648549 | M | Oromia Re HE Qualific   | 0 | 60  | N | Pass        |
| 648553 | F | Addis Abak A Level or I | 0 | 60  | N | Pass        |
| 648556 | F | Amhara Re A Level or I  | 0 | 120 | N | Withdrawn   |
| 648585 | F | South Regi A Level or I | 0 | 120 | N | Pass        |
| 648589 | F | Amhara Re A Level or I  | 0 | 120 | N | Withdrawn   |
| 648596 | F | Amhara Re Lower Tha     | 0 | 60  | N | Withdrawn   |
| 648640 | F | South Regi A Level or I | 0 | 60  | N | Withdrawn   |
| 648676 | M | South Regi HE Qualific  | 0 | 60  | N | Withdrawn   |
| 648693 | F | Afar Regio A Level or I | 0 | 60  | Y | Distinction |
| 648709 | F | South Regi A Level or I | 0 | 120 | N | Withdrawn   |
| 648713 | F | Amhara Re Lower Tha     | 0 | 60  | N | Pass        |
| 648728 | M | South Wes A Level or I  | 0 | 60  | N | Pass        |
| 648751 | M | Afar Regio HE Qualific  | 0 | 60  | N | Pass        |
| 648754 | F | Addis Abak A Level or I | 0 | 120 | N | Withdrawn   |
| 648760 | F | Somalia Re Lower Tha    | 0 | 120 | N | Pass        |
| 648778 | F | Afar Regio A Level or I | 0 | 60  | N | Pass        |
| 648807 | F | South Regi A Level or I | 0 | 120 | N | Pass        |
| 648820 | F | Addis Abak Lower Tha    | 0 | 180 | N | Withdrawn   |
| 648845 | F | Tigrai Regi Lower Tha   | 0 | 120 | N | Pass        |
| 648928 | F | North Regi Lower Tha    | 0 | 60  | N | Withdrawn   |
| 648951 | F | Somalia Re No Formal    | 0 | 60  | N | Fail        |
| 648961 | F | Sidamo Re A Level or I  | 0 | 60  | N | Withdrawn   |
| 648985 | F | Addis Abak Lower Tha    | 0 | 60  | N | Pass        |
| 649000 | F | Sidamo Re Lower Tha     | 0 | 120 | N | Withdrawn   |
| 649018 | F | South Wes A Level or I  | 0 | 60  | N | Pass        |
| 649025 | F | South Regi Lower Tha    | 0 | 60  | N | Pass        |
| 649026 | M | South Wes Lower Tha     | 0 | 120 | N | Withdrawn   |

|        |   |             |              |   |     |   |             |
|--------|---|-------------|--------------|---|-----|---|-------------|
| 649027 | F | Sidamo Re   | A Level or I | 0 | 120 | N | Fail        |
| 649110 | F | South Regi  | A Level or I | 0 | 60  | N | Pass        |
| 649119 | F | Sidamo Re   | A Level or I | 0 | 60  | N | Pass        |
| 649189 | F | Sidamo Re   | Lower Than   | 0 | 60  | N | Distinction |
| 649209 | F | Somalia Re  | Lower Than   | 0 | 120 | N | Withdrawn   |
| 649221 | F | South Regi  | Lower Than   | 0 | 60  | N | Pass        |
| 649231 | F | South Regi  | A Level or I | 0 | 60  | N | Pass        |
| 649247 | F | Addis Abak  | Lower Than   | 0 | 60  | N | Withdrawn   |
| 649278 | F | South Regi  | Lower Than   | 0 | 60  | N | Withdrawn   |
| 649291 | F | South Regi  | Lower Than   | 0 | 60  | N | Pass        |
| 649345 | F | Addis Abak  | HE Qualific  | 0 | 60  | N | Pass        |
| 649351 | F | Somalia Re  | Lower Than   | 0 | 60  | Y | Withdrawn   |
| 649444 | F | Sidamo Re   | A Level or I | 0 | 180 | N | Withdrawn   |
| 649518 | F | Addis Abak  | A Level or I | 0 | 60  | N | Pass        |
| 649542 | F | South Regi  | A Level or I | 0 | 60  | N | Withdrawn   |
| 649543 | F | Addis Abak  | Lower Than   | 0 | 60  | N | Fail        |
| 649578 | F | Afar Regioi | Lower Than   | 0 | 120 | N | Fail        |
| 649621 | F | Addis Abak  | Lower Than   | 0 | 60  | N | Fail        |
| 649638 | F | South Wes   | Lower Than   | 0 | 60  | N | Withdrawn   |
| 649654 | F | Oromia Re   | Lower Than   | 0 | 60  | N | Distinction |
| 649686 | F | Sidamo Re   | Lower Than   | 0 | 60  | N | Withdrawn   |
| 649692 | F | Afar Regioi | Lower Than   | 0 | 60  | N | Fail        |
| 649731 | F | Oromia Re   | Lower Than   | 0 | 120 | N | Withdrawn   |
| 649742 | F | South Regi  | Lower Than   | 0 | 150 | N | Pass        |
| 649749 | F | Afar Regioi | A Level or I | 0 | 60  | N | Pass        |
| 649795 | F | Sidamo Re   | Lower Than   | 0 | 60  | N | Pass        |
| 649824 | F | South Regi  | A Level or I | 0 | 60  | N | Distinction |
| 649886 | F | Sidamo Re   | A Level or I | 0 | 60  | N | Withdrawn   |
| 649905 | F | Afar Regioi | HE Qualific  | 0 | 60  | N | Pass        |
| 649962 | F | Amhara Re   | Lower Than   | 0 | 60  | N | Pass        |
| 649980 | F | Afar Regioi | A Level or I | 0 | 120 | N | Withdrawn   |
| 650050 | F | Addis Abak  | Lower Than   | 0 | 60  | N | Fail        |
| 650090 | F | Addis Abak  | A Level or I | 0 | 120 | N | Withdrawn   |
| 650114 | F | Amhara Re   | A Level or I | 0 | 60  | N | Pass        |
| 650121 | F | Addis Abak  | Lower Than   | 0 | 60  | N | Withdrawn   |
| 650161 | F | Addis Abak  | A Level or I | 0 | 60  | N | Distinction |
| 650181 | F | South Regi  | Lower Than   | 0 | 60  | N | Withdrawn   |
| 650247 | F | Oromia Re   | A Level or I | 0 | 60  | N | Pass        |
| 650269 | F | Sidamo Re   | Lower Than   | 0 | 120 | N | Pass        |
| 650354 | F | Tigrai Regi | A Level or I | 0 | 60  | N | Withdrawn   |
| 650357 | F | South Regi  | A Level or I | 0 | 120 | N | Withdrawn   |
| 650371 | M | Oromia Re   | Lower Than   | 0 | 60  | N | Pass        |
| 650433 | F | Afar Regioi | A Level or I | 0 | 120 | N | Fail        |
| 650451 | F | Tigrai Regi | Lower Than   | 0 | 60  | N | Withdrawn   |
| 650517 | F | Sidamo Re   | Lower Than   | 0 | 120 | N | Fail        |
| 650531 | F | Sidamo Re   | HE Qualific  | 0 | 180 | N | Pass        |
| 650548 | F | Afar Regioi | Lower Than   | 0 | 60  | N | Fail        |



|        |   |                          |   |     |   |             |
|--------|---|--------------------------|---|-----|---|-------------|
| 650565 | F | South Wes Lower Thar     | 0 | 60  | N | Fail        |
| 650606 | F | South Regi No Formal     | 0 | 60  | N | Distinction |
| 650676 | F | South Regi Lower Thar    | 0 | 60  | N | Withdrawn   |
| 650746 | F | Addis Abak Lower Thar    | 0 | 180 | N | Withdrawn   |
| 650797 | F | Addis Abak A Level or I  | 0 | 60  | N | Pass        |
| 650953 | F | South Regi Lower Thar    | 0 | 60  | N | Fail        |
| 650958 | F | South Wes Lower Thar     | 0 | 60  | N | Pass        |
| 650961 | F | South Regi A Level or I  | 0 | 60  | N | Withdrawn   |
| 650964 | F | Oromia Re Lower Thar     | 0 | 60  | N | Withdrawn   |
| 650979 | F | South Wes A Level or I   | 0 | 60  | N | Pass        |
| 651004 | F | South Regi Lower Thar    | 0 | 120 | N | Withdrawn   |
| 651008 | F | Tigrai Regi HE Qualific  | 0 | 90  | N | Pass        |
| 651027 | F | Sidamo Re A Level or I   | 0 | 60  | N | Pass        |
| 651030 | F | Addis Abak Lower Thar    | 0 | 120 | N | Withdrawn   |
| 651065 | F | South Wes Lower Thar     | 0 | 60  | N | Pass        |
| 651087 | F | Amhara Re A Level or I   | 0 | 60  | N | Fail        |
| 651089 | F | South Regi A Level or I  | 0 | 120 | N | Withdrawn   |
| 651148 | F | Afar Regioi A Level or I | 0 | 60  | N | Pass        |
| 651177 | F | Afar Regioi A Level or I | 0 | 60  | N | Pass        |
| 651209 | F | Sidamo Re A Level or I   | 0 | 60  | N | Pass        |
| 651257 | F | Tigrai Regi Lower Thar   | 0 | 60  | N | Pass        |
| 651278 | F | Sidamo Re A Level or I   | 0 | 60  | N | Fail        |
| 651324 | F | Sidamo Re Lower Thar     | 0 | 60  | N | Pass        |
| 651359 | F | Addis Abak HE Qualific   | 0 | 120 | N | Distinction |
| 651394 | F | Afar Regioi HE Qualific  | 0 | 120 | N | Fail        |
| 651415 | F | Sidamo Re A Level or I   | 0 | 120 | N | Pass        |
| 651429 | F | Afar Regioi HE Qualific  | 0 | 60  | N | Pass        |
| 651520 | F | Sidamo Re HE Qualific    | 0 | 60  | N | Withdrawn   |
| 651544 | F | Sidamo Re Lower Thar     | 0 | 120 | N | Pass        |
| 651586 | F | Somalia Re Lower Thar    | 0 | 120 | N | Withdrawn   |
| 651605 | M | Tigrai Regi Lower Thar   | 0 | 60  | N | Pass        |
| 651609 | F | South Regi Lower Thar    | 0 | 120 | N | Withdrawn   |
| 651610 | F | Sidamo Re Lower Thar     | 0 | 60  | N | Withdrawn   |
| 651655 | F | Sidamo Re Lower Thar     | 0 | 60  | N | Pass        |
| 651659 | F | Sidamo Re Lower Thar     | 0 | 120 | N | Pass        |
| 651678 | F | South Wes A Level or I   | 0 | 120 | N | Pass        |
| 651775 | M | Tigrai Regi Lower Thar   | 0 | 120 | N | Pass        |
| 651778 | M | South Regi Lower Thar    | 0 | 60  | N | Fail        |
| 651798 | F | Amhara Re Lower Thar     | 0 | 120 | N | Withdrawn   |
| 651801 | F | Amhara Re A Level or I   | 0 | 60  | N | Withdrawn   |
| 651814 | M | Sidamo Re HE Qualific    | 0 | 60  | N | Withdrawn   |
| 651831 | M | Sidamo Re A Level or I   | 0 | 120 | N | Withdrawn   |
| 651863 | F | South Wes A Level or I   | 0 | 60  | N | Pass        |
| 651883 | F | Afar Regioi Lower Thar   | 0 | 60  | N | Pass        |
| 651925 | F | Amhara Re A Level or I   | 0 | 120 | Y | Pass        |
| 651939 | F | Addis Abak Lower Thar    | 0 | 60  | N | Pass        |
| 651974 | F | Oromia Re A Level or I   | 0 | 120 | N | Withdrawn   |

|        |   |                          |   |     |   |             |
|--------|---|--------------------------|---|-----|---|-------------|
| 651979 | F | Amhara Re A Level or I   | 0 | 60  | N | Pass        |
| 651980 | F | South Regi A Level or I  | 0 | 120 | N | Distinction |
| 651991 | F | Tigrai Regi HE Qualific  | 0 | 120 | N | Pass        |
| 652006 | F | Amhara Re No Formal      | 0 | 120 | N | Withdrawn   |
| 652017 | F | Amhara Re Lower Thar     | 0 | 120 | N | Withdrawn   |
| 652044 | M | Afar Regio HE Qualific   | 0 | 60  | N | Pass        |
| 652090 | F | Tigrai Regi Lower Thar   | 0 | 60  | N | Distinction |
| 652105 | F | Tigrai Regi Lower Thar   | 0 | 60  | N | Fail        |
| 652114 | F | Sidamo Re Lower Thar     | 0 | 60  | N | Fail        |
| 652130 | F | Somalia Re Lower Thar    | 0 | 60  | N | Withdrawn   |
| 652149 | F | Addis Abak No Formal     | 0 | 60  | N | Pass        |
| 652156 | M | Addis Abak Lower Thar    | 0 | 120 | N | Pass        |
| 652158 | F | Sidamo Re Lower Thar     | 0 | 120 | N | Pass        |
| 652226 | F | South Wes A Level or I   | 0 | 60  | N | Pass        |
| 652288 | M | Oromia Re A Level or I   | 0 | 60  | N | Fail        |
| 652315 | F | Amhara Re Lower Thar     | 0 | 120 | N | Withdrawn   |
| 652366 | F | Sidamo Re Lower Thar     | 0 | 60  | N | Withdrawn   |
| 652390 | F | Amhara Re A Level or I   | 0 | 60  | N | Pass        |
| 652522 | F | South Wes Lower Thar     | 0 | 60  | N | Fail        |
| 652533 | F | Sidamo Re Lower Thar     | 0 | 60  | N | Withdrawn   |
| 652553 | F | Sidamo Re A Level or I   | 0 | 60  | N | Pass        |
| 652556 | F | Somalia Re A Level or I  | 0 | 60  | N | Fail        |
| 652558 | F | South Regi Lower Thar    | 0 | 60  | N | Withdrawn   |
| 652572 | F | Sidamo Re A Level or I   | 0 | 60  | N | Pass        |
| 652584 | F | South Wes A Level or I   | 0 | 120 | N | Withdrawn   |
| 652585 | F | Somalia Re A Level or I  | 0 | 60  | N | Withdrawn   |
| 652586 | F | Amhara Re Lower Thar     | 0 | 60  | N | Distinction |
| 652605 | F | Amhara Re HE Qualific    | 0 | 120 | N | Pass        |
| 652731 | F | South Wes A Level or I   | 0 | 120 | N | Withdrawn   |
| 652744 | F | Addis Abak No Formal     | 0 | 180 | N | Withdrawn   |
| 652754 | F | South Regi Lower Thar    | 0 | 60  | N | Withdrawn   |
| 652803 | F | Sidamo Re HE Qualific    | 0 | 120 | N | Withdrawn   |
| 652818 | F | Oromia Re A Level or I   | 0 | 60  | N | Pass        |
| 652851 | F | Amhara Re Lower Thar     | 0 | 60  | N | Pass        |
| 652886 | M | South Regi A Level or I  | 0 | 90  | Y | Pass        |
| 652906 | F | Addis Abak A Level or I  | 0 | 60  | Y | Withdrawn   |
| 652933 | F | Sidamo Re Lower Thar     | 0 | 240 | N | Withdrawn   |
| 652969 | F | Tigrai Regi A Level or I | 0 | 60  | N | Pass        |
| 653027 | F | Sidamo Re Lower Thar     | 0 | 60  | Y | Fail        |
| 653034 | F | Addis Abak No Formal     | 0 | 120 | N | Withdrawn   |
| 653052 | F | South Wes Lower Thar     | 0 | 90  | N | Fail        |
| 653059 | F | Afar Regio Lower Thar    | 0 | 60  | Y | Fail        |
| 653068 | F | Sidamo Re A Level or I   | 0 | 120 | N | Pass        |
| 653086 | F | Addis Abak A Level or I  | 0 | 60  | Y | Distinction |
| 653097 | F | South Regi Lower Thar    | 0 | 60  | N | Withdrawn   |
| 653188 | F | Oromia Re Lower Thar     | 0 | 60  | N | Fail        |
| 653193 | F | Sidamo Re Lower Thar     | 0 | 60  | N | Withdrawn   |

|        |   |                          |   |     |   |             |
|--------|---|--------------------------|---|-----|---|-------------|
| 653239 | F | Sidamo Re Lower Tha      | 0 | 60  | N | Pass        |
| 653240 | F | Addis Abak Lower Tha     | 0 | 240 | N | Pass        |
| 653244 | F | Oromia Re Lower Tha      | 0 | 60  | N | Withdrawn   |
| 653262 | M | South Wes A Level or I   | 0 | 120 | N | Pass        |
| 653295 | F | Tigrai Regi Lower Tha    | 0 | 60  | Y | Withdrawn   |
| 653384 | F | North Regi A Level or I  | 0 | 120 | N | Withdrawn   |
| 653385 | F | North Regi A Level or I  | 0 | 120 | N | Withdrawn   |
| 653465 | F | Sidamo Re Lower Tha      | 0 | 60  | N | Fail        |
| 653541 | F | South Regi A Level or I  | 0 | 120 | N | Withdrawn   |
| 653551 | F | South Wes Lower Tha      | 0 | 180 | N | Withdrawn   |
| 653577 | F | South Regi HE Qualific   | 0 | 60  | N | Distinction |
| 653597 | F | North Regi A Level or I  | 0 | 60  | N | Fail        |
| 653633 | M | Somalia Re Lower Tha     | 0 | 60  | N | Withdrawn   |
| 653664 | F | Sidamo Re A Level or I   | 0 | 120 | N | Pass        |
| 653702 | F | South Regi Lower Tha     | 0 | 60  | N | Pass        |
| 653730 | F | Somalia Re Lower Tha     | 0 | 60  | N | Withdrawn   |
| 653752 | F | Tigrai Regi A Level or I | 0 | 60  | N | Fail        |
| 653762 | F | South Wes Lower Tha      | 0 | 60  | N | Fail        |
| 653826 | F | Amhara Re HE Qualific    | 0 | 120 | N | Withdrawn   |
| 653840 | F | Afar Regio A Level or I  | 0 | 60  | N | Pass        |
| 653870 | F | Amhara Re A Level or I   | 0 | 60  | N | Pass        |
| 653944 | F | Sidamo Re A Level or I   | 0 | 120 | N | Pass        |
| 653951 | F | Oromia Re HE Qualific    | 0 | 60  | N | Fail        |
| 653952 | F | Somalia Re A Level or I  | 0 | 150 | N | Withdrawn   |
| 653958 | F | Sidamo Re A Level or I   | 0 | 120 | N | Pass        |
| 654001 | M | South Regi Lower Tha     | 0 | 120 | N | Withdrawn   |
| 654005 | F | Tigrai Regi A Level or I | 0 | 120 | N | Pass        |
| 654043 | F | Sidamo Re A Level or I   | 0 | 180 | N | Pass        |
| 654071 | F | Somalia Re A Level or I  | 0 | 60  | N | Withdrawn   |
| 654206 | F | Addis Abak Lower Tha     | 0 | 120 | N | Pass        |
| 654214 | F | South Wes Lower Tha      | 0 | 60  | N | Withdrawn   |
| 654256 | F | Amhara Re Lower Tha      | 0 | 120 | N | Withdrawn   |
| 654259 | F | Sidamo Re HE Qualific    | 0 | 120 | N | Withdrawn   |
| 654265 | F | Oromia Re A Level or I   | 0 | 60  | N | Withdrawn   |
| 654333 | F | Somalia Re A Level or I  | 0 | 60  | N | Withdrawn   |
| 654392 | F | Tigrai Regi HE Qualific  | 0 | 60  | N | Withdrawn   |
| 654404 | F | South Wes Lower Tha      | 0 | 60  | N | Pass        |
| 654415 | M | South Regi Lower Tha     | 0 | 60  | Y | Pass        |
| 654422 | F | Somalia Re No Formal     | 0 | 60  | N | Withdrawn   |
| 654524 | F | Somalia Re Lower Tha     | 0 | 120 | N | Pass        |
| 654545 | F | Afar Regio HE Qualific   | 0 | 60  | N | Fail        |
| 654585 | F | Sidamo Re HE Qualific    | 0 | 120 | N | Fail        |
| 654639 | F | Sidamo Re No Formal      | 0 | 120 | N | Withdrawn   |
| 654657 | F | South Wes HE Qualific    | 0 | 60  | N | Pass        |
| 654678 | M | Oromia Re A Level or I   | 0 | 60  | N | Withdrawn   |
| 654796 | F | Sidamo Re A Level or I   | 0 | 120 | Y | Withdrawn   |
| 654856 | F | South Regi Lower Tha     | 0 | 120 | N | Pass        |

|        |   |                          |   |     |   |             |
|--------|---|--------------------------|---|-----|---|-------------|
| 654913 | F | South Regi Lower Tha     | 0 | 120 | N | Withdrawn   |
| 654923 | F | Somalia Re Lower Tha     | 0 | 60  | N | Withdrawn   |
| 654958 | F | Addis Abak Lower Tha     | 0 | 180 | N | Withdrawn   |
| 655084 | F | Somalia Re Lower Tha     | 0 | 120 | N | Pass        |
| 655086 | F | Addis Abak Lower Tha     | 0 | 60  | N | Fail        |
| 655152 | F | Afar Regio HE Qualific   | 0 | 120 | N | Withdrawn   |
| 655155 | F | Addis Abak A Level or I  | 0 | 60  | N | Withdrawn   |
| 655224 | F | Sidamo Re A Level or I   | 0 | 60  | N | Withdrawn   |
| 655230 | F | Somalia Re A Level or I  | 0 | 120 | N | Withdrawn   |
| 655296 | F | North Regi A Level or I  | 0 | 90  | N | Pass        |
| 655314 | M | Sidamo Re A Level or I   | 0 | 120 | N | Distinction |
| 655342 | F | Sidamo Re A Level or I   | 0 | 60  | N | Pass        |
| 655406 | F | Somalia Re Lower Tha     | 0 | 120 | N | Withdrawn   |
| 655414 | F | South Regi Lower Tha     | 0 | 60  | N | Withdrawn   |
| 655460 | F | South Wes Lower Tha      | 0 | 60  | N | Fail        |
| 655471 | F | Tigrai Regi Lower Tha    | 0 | 60  | N | Fail        |
| 655546 | F | South Wes HE Qualific    | 0 | 60  | N | Pass        |
| 655547 | F | South Wes A Level or I   | 0 | 60  | N | Pass        |
| 655572 | F | Tigrai Regi Lower Tha    | 0 | 60  | N | Fail        |
| 655605 | F | South Wes Lower Tha      | 0 | 60  | N | Fail        |
| 655613 | F | South Wes Lower Tha      | 0 | 60  | N | Fail        |
| 655662 | M | Somalia Re Lower Tha     | 0 | 60  | N | Fail        |
| 655668 | M | Oromia Re A Level or I   | 0 | 60  | N | Fail        |
| 655828 | F | Sidamo Re A Level or I   | 0 | 60  | N | Pass        |
| 655829 | F | Tigrai Regi A Level or I | 0 | 60  | N | Withdrawn   |
| 655878 | F | South Regi Lower Tha     | 0 | 60  | Y | Withdrawn   |
| 655992 | M | Sidamo Re HE Qualific    | 0 | 60  | N | Withdrawn   |
| 656067 | F | Somalia Re Lower Tha     | 0 | 60  | N | Pass        |
| 656089 | F | Afar Regio HE Qualific   | 0 | 60  | N | Withdrawn   |
| 656112 | F | Addis Abak Lower Tha     | 0 | 180 | N | Withdrawn   |
| 656122 | F | South Wes Lower Tha      | 0 | 60  | N | Withdrawn   |
| 656129 | F | Oromia Re A Level or I   | 0 | 120 | N | Withdrawn   |
| 656181 | F | South Wes Lower Tha      | 0 | 60  | N | Fail        |
| 656187 | M | South Wes A Level or I   | 0 | 60  | N | Pass        |
| 656190 | M | South Wes Lower Tha      | 0 | 60  | N | Pass        |
| 656194 | F | South Wes Lower Tha      | 0 | 120 | N | Pass        |
| 656196 | F | South Wes Lower Tha      | 0 | 60  | N | Pass        |
| 656197 | M | Afar Regio HE Qualific   | 0 | 60  | N | Pass        |
| 656200 | M | South Wes Lower Tha      | 0 | 60  | N | Pass        |
| 656204 | F | South Wes A Level or I   | 0 | 60  | N | Withdrawn   |
| 656206 | F | South Wes Lower Tha      | 0 | 60  | N | Pass        |
| 656208 | F | South Wes Lower Tha      | 0 | 60  | N | Pass        |
| 656217 | F | South Regi Lower Tha     | 0 | 60  | N | Pass        |
| 656222 | F | Addis Abak A Level or I  | 0 | 120 | N | Fail        |
| 656227 | F | South Wes A Level or I   | 0 | 60  | N | Distinction |
| 656228 | F | Amhara Re Lower Tha      | 0 | 120 | N | Withdrawn   |
| 656253 | F | South Wes Lower Tha      | 0 | 60  | N | Pass        |

|        |   |                          |   |     |   |             |
|--------|---|--------------------------|---|-----|---|-------------|
| 656276 | F | South Regi A Level or I  | 0 | 60  | N | Fail        |
| 656352 | F | Addis Abak Lower Tha     | 0 | 60  | N | Pass        |
| 656373 | F | Tigrai Regi A Level or I | 0 | 60  | N | Distinction |
| 656386 | F | Sidamo Re A Level or I   | 0 | 60  | N | Pass        |
| 656412 | F | Addis Abak A Level or I  | 0 | 120 | N | Withdrawn   |
| 656453 | F | South Wes Lower Tha      | 0 | 60  | N | Withdrawn   |
| 656455 | M | South Wes A Level or I   | 0 | 60  | N | Fail        |
| 656472 | F | South Regi A Level or I  | 0 | 60  | N | Withdrawn   |
| 656475 | M | South Wes HE Qualific    | 0 | 60  | N | Fail        |
| 656481 | F | South Wes A Level or I   | 0 | 60  | N | Pass        |
| 656494 | F | South Wes A Level or I   | 0 | 60  | N | Pass        |
| 656522 | F | Oromia Re A Level or I   | 0 | 60  | N | Pass        |
| 656540 | M | South Regi A Level or I  | 0 | 60  | N | Pass        |
| 656549 | F | Afar Regio Lower Tha     | 0 | 60  | N | Withdrawn   |
| 656557 | F | Oromia Re Lower Tha      | 0 | 60  | N | Pass        |
| 656566 | F | Sidamo Re A Level or I   | 0 | 180 | N | Fail        |
| 656576 | F | Sidamo Re Lower Tha      | 0 | 180 | N | Withdrawn   |
| 656681 | F | Tigrai Regi A Level or I | 0 | 60  | N | Pass        |
| 656698 | F | South Wes Lower Tha      | 0 | 60  | N | Fail        |
| 656711 | F | South Wes Lower Tha      | 0 | 60  | N | Pass        |
| 656755 | F | Sidamo Re A Level or I   | 0 | 60  | N | Fail        |
| 656784 | F | Afar Regio HE Qualific   | 0 | 60  | N | Fail        |
| 656873 | F | Addis Abak A Level or I  | 0 | 120 | N | Pass        |
| 656915 | F | Afar Regio HE Qualific   | 0 | 60  | N | Pass        |
| 656990 | M | Sidamo Re Lower Tha      | 0 | 60  | N | Pass        |
| 657032 | F | South Regi Lower Tha     | 0 | 60  | N | Pass        |
| 657099 | F | South Regi A Level or I  | 0 | 120 | Y | Fail        |
| 657290 | F | Sidamo Re Lower Tha      | 0 | 60  | N | Pass        |
| 657293 | F | Sidamo Re A Level or I   | 0 | 60  | N | Distinction |
| 674201 | F | South Regi A Level or I  | 0 | 60  | N | Withdrawn   |
| 674214 | F | South Regi HE Qualific   | 0 | 60  | N | Pass        |
| 674276 | F | Afar Regio HE Qualific   | 0 | 60  | N | Pass        |
| 674280 | F | Sidamo Re Lower Tha      | 0 | 120 | N | Withdrawn   |
| 674290 | F | North Regi A Level or I  | 0 | 60  | N | Distinction |
| 674319 | F | Sidamo Re Lower Tha      | 0 | 60  | N | Withdrawn   |
| 674322 | M | Afar Regio HE Qualific   | 0 | 60  | N | Pass        |
| 674323 | F | Sidamo Re Lower Tha      | 0 | 60  | N | Withdrawn   |
| 674349 | F | South Regi A Level or I  | 0 | 60  | N | Distinction |
| 674495 | F | Afar Regio A Level or I  | 0 | 60  | N | Pass        |
| 674501 | F | Amhara Re A Level or I   | 0 | 60  | Y | Withdrawn   |
| 674502 | F | Oromia Re Lower Tha      | 0 | 60  | N | Withdrawn   |
| 674548 | F | South Wes Lower Tha      | 0 | 60  | N | Withdrawn   |
| 674576 | F | Amhara Re A Level or I   | 0 | 60  | N | Pass        |
| 674605 | F | Tigrai Regi Lower Tha    | 0 | 60  | N | Pass        |
| 674616 | F | Sidamo Re A Level or I   | 0 | 60  | N | Fail        |
| 674643 | M | South Regi Lower Tha     | 0 | 120 | N | Withdrawn   |
| 674746 | F | Addis Abak HE Qualific   | 0 | 120 | N | Withdrawn   |

|        |   |                          |   |     |   |             |
|--------|---|--------------------------|---|-----|---|-------------|
| 674748 | F | South Regi A Level or I  | 0 | 120 | N | Withdrawn   |
| 674758 | F | South Regi A Level or I  | 0 | 60  | N | Withdrawn   |
| 674777 | F | Afar Regio Lower Than    | 0 | 60  | N | Pass        |
| 674784 | F | South Wes HE Qualific    | 0 | 120 | N | Pass        |
| 674922 | F | North Regi Lower Than    | 0 | 60  | N | Pass        |
| 674960 | F | South Wes A Level or I   | 0 | 60  | N | Pass        |
| 675042 | F | Sidamo Re No Formal      | 0 | 60  | N | Pass        |
| 675047 | F | North Regi HE Qualific   | 0 | 60  | N | Withdrawn   |
| 675059 | F | Sidamo Re Lower Than     | 0 | 60  | N | Fail        |
| 675085 | F | Afar Regio Lower Than    | 0 | 60  | Y | Pass        |
| 675094 | F | Somalia Re Lower Than    | 0 | 90  | N | Withdrawn   |
| 675096 | M | Somalia Re Lower Than    | 0 | 60  | N | Withdrawn   |
| 675116 | F | Sidamo Re Lower Than     | 0 | 240 | N | Withdrawn   |
| 675159 | F | Afar Regio Lower Than    | 0 | 60  | N | Pass        |
| 675161 | M | Sidamo Re Lower Than     | 0 | 120 | Y | Withdrawn   |
| 675165 | F | Sidamo Re HE Qualific    | 0 | 60  | N | Withdrawn   |
| 675178 | F | Tigrai Regi A Level or I | 0 | 60  | N | Withdrawn   |
| 675223 | F | Afar Regio Lower Than    | 0 | 60  | N | Pass        |
| 675231 | F | Afar Regio A Level or I  | 0 | 60  | N | Pass        |
| 675246 | F | South Regi HE Qualific   | 0 | 60  | N | Withdrawn   |
| 675526 | F | Afar Regio Lower Than    | 0 | 120 | N | Pass        |
| 675576 | F | Oromia Re Lower Than     | 0 | 60  | N | Pass        |
| 675627 | F | Sidamo Re Lower Than     | 0 | 120 | N | Withdrawn   |
| 675671 | F | South Regi A Level or I  | 0 | 60  | N | Withdrawn   |
| 675673 | F | North Regi A Level or I  | 0 | 60  | N | Withdrawn   |
| 675728 | F | Somalia Re Lower Than    | 0 | 60  | N | Fail        |
| 675750 | F | South Regi Lower Than    | 0 | 120 | N | Withdrawn   |
| 675807 | F | Afar Regio HE Qualific   | 0 | 60  | N | Pass        |
| 675922 | F | Addis Abak A Level or I  | 0 | 60  | N | Withdrawn   |
| 675929 | F | South Regi Lower Than    | 0 | 60  | N | Fail        |
| 676011 | F | South Wes A Level or I   | 0 | 120 | N | Fail        |
| 676093 | F | Somalia Re Lower Than    | 0 | 60  | N | Withdrawn   |
| 676151 | F | Amhara Re Lower Than     | 0 | 60  | N | Pass        |
| 676169 | F | Amhara Re A Level or I   | 0 | 60  | N | Pass        |
| 676176 | F | Addis Abak A Level or I  | 0 | 120 | N | Pass        |
| 676258 | F | South Wes Lower Than     | 0 | 120 | N | Withdrawn   |
| 676322 | F | Afar Regio Lower Than    | 0 | 120 | N | Distinction |
| 676350 | F | Sidamo Re Lower Than     | 0 | 60  | N | Fail        |
| 676376 | F | Tigrai Regi A Level or I | 0 | 180 | N | Withdrawn   |
| 676401 | F | Oromia Re HE Qualific    | 0 | 120 | N | Distinction |
| 676420 | F | South Wes Lower Than     | 0 | 90  | N | Withdrawn   |
| 676428 | F | Oromia Re Lower Than     | 0 | 60  | N | Pass        |
| 676604 | F | South Regi Lower Than    | 0 | 90  | N | Fail        |
| 676633 | F | South Regi Lower Than    | 0 | 120 | N | Pass        |
| 676705 | F | South Regi A Level or I  | 0 | 60  | N | Distinction |
| 676750 | F | Oromia Re Lower Than     | 0 | 60  | N | Distinction |
| 676785 | F | Somalia Re HE Qualific   | 0 | 60  | N | Withdrawn   |

|        |   |                          |   |     |   |           |
|--------|---|--------------------------|---|-----|---|-----------|
| 676898 | F | South Wes A Level or I   | 0 | 120 | N | Pass      |
| 676948 | F | Tigrai Regi Lower Tha    | 0 | 60  | N | Pass      |
| 676962 | M | Tigrai Regi Lower Tha    | 0 | 60  | N | Pass      |
| 676969 | F | Afar Regi Lower Tha      | 0 | 60  | N | Fail      |
| 676973 | F | South Regi A Level or I  | 0 | 60  | N | Withdrawn |
| 677004 | F | Sidamo Re Lower Tha      | 0 | 60  | N | Fail      |
| 677039 | F | South Wes Lower Tha      | 0 | 60  | N | Withdrawn |
| 677154 | F | Sidamo Re Lower Tha      | 0 | 60  | N | Fail      |
| 677190 | F | South Regi A Level or I  | 0 | 60  | N | Withdrawn |
| 677201 | F | Afar Regi Lower Tha      | 0 | 120 | N | Fail      |
| 677203 | M | South Regi A Level or I  | 0 | 120 | N | Pass      |
| 677230 | F | Addis Abat A Level or I  | 0 | 60  | Y | Withdrawn |
| 677338 | F | Somalia Re A Level or I  | 0 | 120 | Y | Withdrawn |
| 677411 | F | North Regi Lower Tha     | 0 | 60  | N | Withdrawn |
| 677462 | F | Afar Regi A Level or I   | 0 | 120 | N | Pass      |
| 677498 | F | Tigrai Regi A Level or I | 0 | 120 | N | Fail      |
| 677630 | F | Afar Regi Lower Tha      | 0 | 60  | N | Fail      |
| 677706 | F | South Regi Lower Tha     | 0 | 180 | N | Withdrawn |
| 677744 | F | Sidamo Re A Level or I   | 0 | 120 | N | Withdrawn |
| 677846 | F | Sidamo Re A Level or I   | 0 | 120 | N | Pass      |
| 677864 | F | South Wes HE Qualific    | 0 | 180 | N | Withdrawn |
| 677873 | F | South Regi A Level or I  | 0 | 60  | N | Pass      |
| 677877 | F | Addis Abat Lower Tha     | 0 | 60  | N | Withdrawn |
| 677879 | F | Addis Abat A Level or I  | 0 | 60  | Y | Fail      |
| 677892 | F | Afar Regi A Level or I   | 0 | 60  | N | Pass      |
| 677922 | F | Sidamo Re A Level or I   | 0 | 60  | Y | Pass      |
| 677950 | F | Somalia Re Lower Tha     | 0 | 60  | N | Withdrawn |
| 677997 | F | Somalia Re Lower Tha     | 0 | 60  | N | Fail      |
| 678016 | F | South Wes Lower Tha      | 0 | 150 | N | Withdrawn |
| 678025 | F | Oromia Re Lower Tha      | 0 | 60  | N | Pass      |
| 678038 | F | Addis Abat A Level or I  | 0 | 60  | N | Pass      |
| 678057 | F | Somalia Re Lower Tha     | 0 | 60  | N | Withdrawn |
| 678080 | F | Tigrai Regi A Level or I | 0 | 120 | N | Fail      |
| 678085 | F | Somalia Re Lower Tha     | 0 | 120 | N | Fail      |
| 678105 | F | South Regi A Level or I  | 0 | 60  | N | Pass      |
| 678107 | F | Sidamo Re Lower Tha      | 0 | 120 | N | Withdrawn |
| 678109 | F | South Regi A Level or I  | 0 | 60  | N | Withdrawn |
| 678110 | F | Addis Abat A Level or I  | 0 | 60  | N | Pass      |
| 678114 | F | Amhara Re Lower Tha      | 0 | 60  | N | Withdrawn |
| 678144 | F | Sidamo Re Lower Tha      | 0 | 60  | Y | Fail      |
| 678212 | F | Afar Regi A Level or I   | 0 | 120 | N | Withdrawn |
| 678213 | F | South Wes A Level or I   | 0 | 60  | Y | Withdrawn |
| 678244 | F | Sidamo Re A Level or I   | 0 | 60  | Y | Pass      |
| 678246 | F | Afar Regi HE Qualific    | 0 | 180 | N | Pass      |
| 678278 | F | Amhara Re A Level or I   | 0 | 60  | N | Withdrawn |
| 678283 | F | Tigrai Regi Lower Tha    | 0 | 120 | N | Fail      |
| 678314 | F | Sidamo Re A Level or I   | 0 | 120 | N | Fail      |

|        |   |                          |   |     |   |             |
|--------|---|--------------------------|---|-----|---|-------------|
| 678327 | F | South Regi Lower Tha     | 0 | 60  | N | Withdrawn   |
| 678328 | F | Somalia Re A Level or I  | 0 | 60  | N | Withdrawn   |
| 678335 | F | Addis Abak Lower Tha     | 0 | 60  | N | Fail        |
| 678367 | M | Afar Regio Lower Tha     | 0 | 60  | N | Withdrawn   |
| 678373 | F | Somalia Re HE Qualific   | 0 | 60  | N | Pass        |
| 678398 | F | Sidamo Re A Level or I   | 0 | 60  | N | Withdrawn   |
| 678444 | F | South Wes Lower Tha      | 0 | 60  | N | Fail        |
| 678550 | F | North Regi A Level or I  | 0 | 120 | N | Withdrawn   |
| 678575 | M | Sidamo Re HE Qualific    | 0 | 60  | N | Withdrawn   |
| 678578 | F | South Wes HE Qualific    | 0 | 60  | N | Withdrawn   |
| 678585 | F | North Regi Lower Tha     | 0 | 60  | N | Withdrawn   |
| 678623 | F | Tigrai Regi Lower Tha    | 0 | 90  | Y | Fail        |
| 678661 | F | South Regi Lower Tha     | 0 | 60  | N | Pass        |
| 678680 | F | South Regi A Level or I  | 0 | 60  | N | Pass        |
| 678688 | F | Afar Regio A Level or I  | 0 | 120 | N | Pass        |
| 678702 | F | Oromia Re Lower Tha      | 0 | 60  | Y | Withdrawn   |
| 678770 | F | Tigrai Regi Lower Tha    | 0 | 60  | N | Fail        |
| 678777 | F | Somalia Re Lower Tha     | 0 | 120 | N | Withdrawn   |
| 678795 | F | Sidamo Re A Level or I   | 0 | 120 | N | Withdrawn   |
| 678801 | F | South Regi HE Qualific   | 0 | 60  | N | Withdrawn   |
| 678815 | F | Amhara Re A Level or I   | 0 | 60  | N | Distinction |
| 678906 | F | South Regi Lower Tha     | 0 | 60  | N | Pass        |
| 678953 | M | Afar Regio HE Qualific   | 0 | 90  | N | Withdrawn   |
| 678955 | M | Addis Abak A Level or I  | 0 | 60  | N | Fail        |
| 678975 | F | South Regi Lower Tha     | 0 | 60  | N | Withdrawn   |
| 678995 | F | Sidamo Re A Level or I   | 0 | 60  | N | Pass        |
| 679057 | M | Sidamo Re HE Qualific    | 0 | 120 | N | Withdrawn   |
| 679059 | F | South Wes A Level or I   | 0 | 60  | N | Pass        |
| 679174 | M | South Wes A Level or I   | 0 | 60  | N | Pass        |
| 679218 | M | Oromia Re Lower Tha      | 0 | 60  | N | Pass        |
| 679232 | F | North Regi Lower Tha     | 0 | 60  | N | Pass        |
| 679439 | F | Oromia Re Lower Tha      | 0 | 60  | N | Fail        |
| 679457 | F | South Wes Lower Tha      | 0 | 60  | N | Fail        |
| 679504 | F | Oromia Re Lower Tha      | 0 | 60  | N | Withdrawn   |
| 679528 | F | South Regi A Level or I  | 0 | 60  | N | Withdrawn   |
| 679559 | F | Addis Abak A Level or I  | 0 | 60  | N | Pass        |
| 679568 | F | Somalia Re Lower Tha     | 0 | 240 | N | Withdrawn   |
| 679675 | F | Amhara Re Lower Tha      | 0 | 60  | N | Withdrawn   |
| 679716 | F | Amhara Re Lower Tha      | 0 | 60  | N | Pass        |
| 679724 | F | Addis Abak Lower Tha     | 0 | 60  | N | Withdrawn   |
| 679726 | F | South Regi Lower Tha     | 0 | 60  | N | Withdrawn   |
| 679747 | F | Somalia Re Lower Tha     | 0 | 60  | N | Withdrawn   |
| 679798 | M | Sidamo Re Lower Tha      | 0 | 120 | N | Pass        |
| 679828 | F | Tigrai Regi A Level or I | 0 | 120 | N | Distinction |
| 679918 | F | South Wes Lower Tha      | 0 | 60  | N | Pass        |
| 679919 | F | Sidamo Re A Level or I   | 0 | 60  | N | Withdrawn   |
| 679967 | F | South Wes A Level or I   | 0 | 60  | N | Pass        |



|        |   |                          |   |     |   |             |
|--------|---|--------------------------|---|-----|---|-------------|
| 679971 | F | Amhara Re Lower Tha      | 0 | 60  | N | Fail        |
| 679989 | M | Sidamo Re Lower Tha      | 0 | 60  | N | Withdrawn   |
| 680009 | F | Sidamo Re Lower Tha      | 0 | 60  | N | Pass        |
| 680110 | F | Somalia Re Lower Tha     | 0 | 120 | N | Withdrawn   |
| 680146 | F | Tigrai Regi A Level or I | 0 | 60  | N | Pass        |
| 680162 | F | South Regi A Level or I  | 0 | 60  | N | Pass        |
| 680174 | F | Addis Abak A Level or I  | 0 | 60  | N | Fail        |
| 680219 | F | Sidamo Re A Level or I   | 0 | 60  | N | Pass        |
| 680290 | M | Tigrai Regi HE Qualific  | 0 | 60  | N | Pass        |
| 680453 | F | South Wes Lower Tha      | 0 | 60  | Y | Pass        |
| 680471 | F | Afar Regi HE Qualific    | 0 | 120 | Y | Fail        |
| 680522 | F | North Regi Lower Tha     | 0 | 60  | N | Withdrawn   |
| 680530 | F | Tigrai Regi Lower Tha    | 0 | 120 | N | Pass        |
| 680541 | F | South Regi A Level or I  | 0 | 60  | N | Pass        |
| 680545 | F | South Regi Lower Tha     | 0 | 60  | N | Pass        |
| 680559 | F | Amhara Re HE Qualific    | 0 | 60  | N | Fail        |
| 680560 | F | Sidamo Re Lower Tha      | 0 | 60  | N | Withdrawn   |
| 680591 | M | Oromia Re A Level or I   | 0 | 60  | N | Withdrawn   |
| 680723 | F | Somalia Re A Level or I  | 0 | 60  | N | Distinction |
| 680732 | F | Amhara Re Lower Tha      | 0 | 180 | N | Withdrawn   |
| 680787 | F | North Regi A Level or I  | 0 | 60  | N | Pass        |
| 680798 | F | Addis Abak A Level or I  | 0 | 60  | N | Pass        |
| 680816 | F | Sidamo Re Lower Tha      | 0 | 60  | N | Withdrawn   |
| 680862 | F | South Regi Lower Tha     | 0 | 60  | Y | Pass        |
| 680878 | M | South Regi Lower Tha     | 0 | 60  | N | Withdrawn   |
| 680918 | M | South Regi A Level or I  | 0 | 60  | N | Pass        |
| 680926 | F | Addis Abak A Level or I  | 0 | 60  | N | Distinction |
| 680959 | F | Addis Abak Lower Tha     | 0 | 60  | N | Withdrawn   |
| 680970 | F | Oromia Re HE Qualific    | 0 | 120 | N | Distinction |
| 680991 | M | Sidamo Re HE Qualific    | 0 | 60  | N | Withdrawn   |
| 681016 | F | Oromia Re Lower Tha      | 0 | 120 | N | Withdrawn   |
| 681089 | F | Amhara Re Lower Tha      | 0 | 120 | N | Withdrawn   |
| 681150 | F | South Wes Lower Tha      | 0 | 60  | N | Pass        |
| 681166 | F | South Regi A Level or I  | 0 | 60  | N | Withdrawn   |
| 681222 | F | Oromia Re HE Qualific    | 0 | 60  | N | Distinction |
| 681289 | F | Addis Abak A Level or I  | 0 | 60  | N | Fail        |
| 681384 | F | South Wes HE Qualific    | 0 | 120 | N | Fail        |
| 681566 | F | Sidamo Re Lower Tha      | 0 | 60  | N | Pass        |
| 681581 | F | Afar Regi Lower Tha      | 0 | 60  | N | Pass        |
| 681710 | F | Sidamo Re HE Qualific    | 0 | 120 | Y | Fail        |
| 681716 | F | Afar Regi Lower Tha      | 0 | 60  | N | Distinction |
| 681752 | F | Afar Regi HE Qualific    | 0 | 120 | N | Fail        |
| 681798 | F | Afar Regi Lower Tha      | 0 | 60  | N | Pass        |
| 681961 | F | Tigrai Regi A Level or I | 0 | 240 | N | Withdrawn   |
| 681964 | F | Tigrai Regi Lower Tha    | 0 | 120 | N | Withdrawn   |
| 681971 | F | South Regi Lower Tha     | 0 | 60  | N | Withdrawn   |
| 681984 | M | Tigrai Regi A Level or I | 0 | 60  | N | Pass        |

|        |   |                                |   |     |   |             |
|--------|---|--------------------------------|---|-----|---|-------------|
| 682051 | F | Sidamo Re Lower Than           | 0 | 60  | N | Pass        |
| 682056 | F | Afar Region Lower Than         | 0 | 60  | N | Fail        |
| 682058 | F | Sidamo Re A Level or Higher    | 0 | 60  | N | Pass        |
| 682107 | F | Addis Ababa A Level or Higher  | 0 | 60  | N | Pass        |
| 682163 | F | Addis Ababa A Level or Higher  | 0 | 60  | N | Withdrawn   |
| 682223 | F | Afar Region HE Qualification   | 0 | 60  | N | Distinction |
| 682289 | F | Somalia Re A Level or Higher   | 0 | 120 | Y | Withdrawn   |
| 682316 | M | South West Lower Than          | 0 | 60  | N | Pass        |
| 682343 | F | Afar Region A Level or Higher  | 0 | 60  | N | Pass        |
| 682364 | M | Afar Region Lower Than         | 0 | 60  | N | Withdrawn   |
| 682366 | M | Tigray Region Lower Than       | 0 | 120 | N | Withdrawn   |
| 682375 | F | South Region Lower Than        | 0 | 120 | N | Withdrawn   |
| 682409 | F | Sidamo Re A Level or Higher    | 0 | 120 | N | Pass        |
| 682480 | F | Oromia Re Lower Than           | 0 | 60  | N | Pass        |
| 682483 | F | Somalia Re Lower Than          | 0 | 60  | N | Pass        |
| 682538 | M | South Region Lower Than        | 0 | 120 | N | Withdrawn   |
| 682627 | F | Tigray Region HE Qualification | 0 | 60  | N | Pass        |
| 682728 | F | Amhara Re Lower Than           | 0 | 120 | N | Withdrawn   |
| 682731 | F | Somalia Re Lower Than          | 0 | 180 | N | Withdrawn   |
| 682887 | F | Somalia Re A Level or Higher   | 0 | 60  | N | Fail        |
| 682913 | F | South West A Level or Higher   | 0 | 60  | N | Withdrawn   |
| 683002 | F | Sidamo Re HE Qualification     | 0 | 60  | N | Distinction |
| 683054 | F | Sidamo Re No Formal            | 0 | 240 | N | Withdrawn   |
| 683120 | F | Tigray Region HE Qualification | 0 | 60  | N | Pass        |
| 683140 | M | Amhara Re Lower Than           | 0 | 60  | Y | Pass        |
| 683145 | F | Sidamo Re Lower Than           | 0 | 120 | N | Pass        |
| 683164 | F | South Region A Level or Higher | 0 | 60  | N | Pass        |
| 683172 | F | Afar Region A Level or Higher  | 0 | 240 | N | Withdrawn   |
| 683202 | F | Afar Region HE Qualification   | 0 | 60  | N | Pass        |
| 683275 | F | South Region A Level or Higher | 0 | 120 | N | Pass        |
| 683301 | F | Amhara Re Lower Than           | 0 | 60  | N | Withdrawn   |
| 683315 | M | Sidamo Re Lower Than           | 0 | 60  | N | Withdrawn   |
| 683338 | F | Sidamo Re No Formal            | 0 | 60  | N | Withdrawn   |
| 683420 | F | Tigray Region Lower Than       | 0 | 60  | N | Pass        |
| 683465 | F | Sidamo Re A Level or Higher    | 0 | 120 | N | Withdrawn   |
| 683536 | F | Amhara Re Lower Than           | 0 | 120 | N | Withdrawn   |
| 683548 | F | Sidamo Re A Level or Higher    | 0 | 60  | N | Fail        |
| 683592 | F | South Region A Level or Higher | 0 | 60  | N | Pass        |
| 683618 | F | Afar Region HE Qualification   | 0 | 60  | N | Pass        |
| 683630 | F | South Region Lower Than        | 0 | 60  | N | Pass        |
| 683664 | F | Afar Region Lower Than         | 0 | 60  | N | Pass        |
| 683705 | F | Afar Region HE Qualification   | 0 | 60  | N | Pass        |
| 683742 | F | Addis Ababa Lower Than         | 0 | 60  | N | Pass        |
| 683768 | F | Somalia Re A Level or Higher   | 0 | 120 | N | Withdrawn   |
| 683779 | F | Tigray Region Lower Than       | 0 | 60  | N | Pass        |
| 683783 | F | South Region HE Qualification  | 0 | 60  | N | Pass        |
| 683792 | F | Somalia Re Lower Than          | 0 | 60  | N | Withdrawn   |

|        |   |                            |   |     |   |             |
|--------|---|----------------------------|---|-----|---|-------------|
| 683802 | F | Sidamo Re Lower Tha        | 0 | 120 | N | Withdrawn   |
| 683817 | F | Amhara Re HE Qualific      | 0 | 120 | N | Distinction |
| 683838 | F | Amhara Re Lower Tha        | 0 | 60  | N | Fail        |
| 683935 | F | Afar Region A Level or I   | 0 | 60  | N | Pass        |
| 683947 | M | Tigray Region A Level or I | 0 | 240 | N | Withdrawn   |
| 683987 | F | Addis Abab A Level or I    | 0 | 60  | Y | Pass        |
| 683993 | F | Oromia Re A Level or I     | 0 | 120 | N | Withdrawn   |
| 684055 | F | Oromia Re Lower Tha        | 0 | 60  | N | Pass        |
| 684072 | F | Sidamo Re A Level or I     | 0 | 60  | N | Pass        |
| 684098 | F | South Wes Lower Tha        | 0 | 60  | N | Fail        |
| 684184 | F | Afar Region A Level or I   | 0 | 60  | N | Distinction |
| 684250 | M | Tigray Region HE Qualific  | 0 | 60  | N | Pass        |
| 684273 | F | Amhara Re Lower Tha        | 0 | 60  | N | Pass        |
| 684319 | M | Afar Region Post Gradu     | 0 | 60  | N | Pass        |
| 684329 | F | Sidamo Re A Level or I     | 0 | 60  | N | Pass        |
| 684375 | M | South Regi A Level or I    | 0 | 60  | Y | Pass        |
| 684420 | F | Sidamo Re A Level or I     | 0 | 60  | N | Fail        |
| 684459 | M | South Wes A Level or I     | 0 | 60  | N | Withdrawn   |
| 684467 | F | South Wes Lower Tha        | 0 | 60  | N | Fail        |
| 684502 | F | North Regi HE Qualific     | 0 | 120 | N | Withdrawn   |
| 684525 | F | South Regi Lower Tha       | 0 | 120 | N | Withdrawn   |
| 684607 | F | South Wes A Level or I     | 0 | 120 | N | Withdrawn   |
| 684615 | F | Somalia Re A Level or I    | 0 | 120 | N | Distinction |
| 684641 | F | Tigray Region Lower Tha    | 0 | 120 | N | Withdrawn   |
| 684681 | F | Tigray Region Lower Tha    | 0 | 60  | N | Fail        |
| 684687 | F | Oromia Re Lower Tha        | 0 | 60  | Y | Pass        |
| 684704 | F | Afar Region Lower Tha      | 0 | 60  | Y | Pass        |
| 684736 | F | Addis Abab Lower Tha       | 0 | 60  | N | Withdrawn   |
| 684833 | F | Sidamo Re HE Qualific      | 0 | 120 | N | Distinction |
| 684890 | F | Sidamo Re Lower Tha        | 0 | 60  | N | Withdrawn   |
| 684931 | F | Oromia Re Lower Tha        | 0 | 60  | Y | Pass        |
| 684971 | F | Sidamo Re Lower Tha        | 0 | 60  | N | Fail        |
| 684982 | F | Sidamo Re A Level or I     | 0 | 60  | N | Withdrawn   |
| 685000 | F | South Regi A Level or I    | 0 | 60  | N | Withdrawn   |
| 685009 | F | South Regi Lower Tha       | 0 | 60  | N | Pass        |
| 685052 | M | Somalia Re Lower Tha       | 0 | 120 | N | Fail        |
| 685079 | F | Amhara Re A Level or I     | 0 | 60  | N | Fail        |
| 685201 | F | Afar Region A Level or I   | 0 | 60  | N | Pass        |
| 685228 | F | South Wes Lower Tha        | 0 | 90  | N | Pass        |
| 685257 | F | South Wes Lower Tha        | 0 | 60  | N | Fail        |
| 685267 | F | Somalia Re A Level or I    | 0 | 60  | N | Pass        |
| 685318 | F | South Wes A Level or I     | 0 | 60  | N | Pass        |
| 685391 | F | Addis Abab A Level or I    | 0 | 60  | N | Pass        |
| 685453 | F | South Wes A Level or I     | 0 | 60  | N | Fail        |
| 685506 | F | Amhara Re Lower Tha        | 0 | 120 | N | Withdrawn   |
| 685592 | F | South Regi Lower Tha       | 0 | 60  | N | Distinction |
| 685599 | F | South Regi Lower Tha       | 0 | 60  | N | Withdrawn   |

|        |   |                          |   |     |   |             |
|--------|---|--------------------------|---|-----|---|-------------|
| 685602 | F | South Wes HE Qualific    | 0 | 60  | N | Withdrawn   |
| 685653 | F | Somalia Re No Formal     | 0 | 60  | N | Fail        |
| 685702 | F | North Regi Post Gradu    | 0 | 60  | N | Pass        |
| 685740 | F | Sidamo Re Lower Than     | 0 | 60  | N | Withdrawn   |
| 685776 | F | Tigrai Regi Lower Than   | 0 | 60  | N | Fail        |
| 685779 | F | Tigrai Regi HE Qualific  | 0 | 60  | N | Pass        |
| 685812 | F | South Regi A Level or I  | 0 | 60  | N | Distinction |
| 685829 | M | Addis Abak A Level or I  | 0 | 60  | N | Pass        |
| 685830 | F | Addis Abak HE Qualific   | 0 | 60  | N | Pass        |
| 685841 | F | Addis Abak Lower Than    | 0 | 60  | N | Fail        |
| 685842 | F | Addis Abak A Level or I  | 0 | 120 | N | Pass        |
| 685861 | F | Amhara Re Lower Than     | 0 | 60  | N | Withdrawn   |
| 685900 | M | Afar Regi Lower Than     | 0 | 60  | N | Fail        |
| 686074 | F | Afar Regi Lower Than     | 0 | 120 | N | Pass        |
| 686093 | F | Sidamo Re HE Qualific    | 0 | 120 | N | Withdrawn   |
| 686128 | F | Somalia Re A Level or I  | 0 | 60  | N | Pass        |
| 686182 | F | Sidamo Re Lower Than     | 0 | 60  | N | Pass        |
| 686191 | F | Afar Regi Lower Than     | 0 | 60  | N | Withdrawn   |
| 686200 | F | Sidamo Re A Level or I   | 0 | 60  | N | Distinction |
| 686201 | F | Oromia Re A Level or I   | 0 | 60  | N | Withdrawn   |
| 686266 | F | South Regi Lower Than    | 0 | 60  | N | Withdrawn   |
| 686286 | F | Addis Abak A Level or I  | 0 | 60  | N | Fail        |
| 686378 | M | Sidamo Re Lower Than     | 0 | 60  | N | Fail        |
| 686402 | F | Somalia Re A Level or I  | 0 | 120 | N | Fail        |
| 686530 | F | South Wes Lower Than     | 0 | 60  | N | Withdrawn   |
| 686596 | F | South Wes Lower Than     | 0 | 60  | N | Fail        |
| 686633 | M | Somalia Re Lower Than    | 0 | 60  | N | Withdrawn   |
| 686667 | F | Afar Regi Lower Than     | 0 | 60  | N | Pass        |
| 686670 | F | Oromia Re Lower Than     | 0 | 60  | N | Pass        |
| 686688 | F | South Regi Lower Than    | 0 | 60  | N | Withdrawn   |
| 686703 | F | Sidamo Re Lower Than     | 0 | 120 | N | Withdrawn   |
| 686725 | F | Tigrai Regi A Level or I | 0 | 120 | N | Pass        |
| 686752 | F | Oromia Re A Level or I   | 0 | 60  | N | Withdrawn   |
| 686762 | F | South Regi Lower Than    | 0 | 60  | N | Pass        |
| 686791 | M | Addis Abak A Level or I  | 0 | 60  | N | Pass        |
| 686822 | F | Addis Abak A Level or I  | 0 | 60  | Y | Pass        |
| 686837 | F | Amhara Re HE Qualific    | 0 | 120 | N | Pass        |
| 686938 | F | Afar Regi Lower Than     | 0 | 60  | N | Pass        |
| 686940 | F | Afar Regi HE Qualific    | 0 | 60  | N | Distinction |
| 686953 | F | Afar Regi Lower Than     | 0 | 120 | N | Fail        |
| 686987 | F | Somalia Re Lower Than    | 0 | 60  | N | Pass        |
| 687004 | F | South Regi Lower Than    | 0 | 60  | N | Fail        |
| 687030 | F | South Regi Lower Than    | 0 | 60  | N | Withdrawn   |
| 687037 | F | Afar Regi A Level or I   | 0 | 60  | N | Pass        |
| 687060 | F | Tigrai Regi Lower Than   | 0 | 60  | Y | Fail        |
| 687105 | F | Afar Regi HE Qualific    | 0 | 60  | N | Withdrawn   |
| 687122 | F | South Regi A Level or I  | 0 | 60  | N | Pass        |

|        |   |                          |   |     |   |             |
|--------|---|--------------------------|---|-----|---|-------------|
| 687154 | F | South Regi Lower Tha     | 0 | 60  | N | Withdrawn   |
| 687157 | F | Afar Regio A Level or I  | 0 | 60  | N | Pass        |
| 687173 | F | Amhara Re Lower Tha      | 0 | 60  | N | Pass        |
| 687185 | F | Afar Regio A Level or I  | 0 | 60  | N | Pass        |
| 687217 | F | Tigrai Regi Lower Tha    | 0 | 60  | N | Withdrawn   |
| 687256 | M | Somalia Re A Level or I  | 0 | 120 | N | Withdrawn   |
| 687301 | F | Tigrai Regi Lower Tha    | 0 | 60  | N | Pass        |
| 687326 | F | Sidamo Re HE Qualific    | 0 | 120 | N | Fail        |
| 687369 | F | South Regi Lower Tha     | 0 | 60  | N | Withdrawn   |
| 687378 | F | Somalia Re A Level or I  | 0 | 60  | N | Pass        |
| 687379 | F | Somalia Re A Level or I  | 0 | 60  | N | Pass        |
| 687402 | F | Tigrai Regi A Level or I | 0 | 60  | N | Pass        |
| 687404 | F | Tigrai Regi HE Qualific  | 0 | 60  | N | Fail        |
| 687406 | F | Tigrai Regi HE Qualific  | 0 | 60  | N | Pass        |
| 687421 | F | Somalia Re Lower Tha     | 0 | 60  | N | Pass        |
| 687444 | F | South Regi Lower Tha     | 0 | 60  | N | Withdrawn   |
| 687533 | F | Tigrai Regi A Level or I | 0 | 60  | N | Distinction |
| 687566 | M | South Wes HE Qualific    | 0 | 120 | N | Distinction |
| 687575 | F | South Wes Lower Tha      | 0 | 120 | N | Distinction |
| 687578 | F | Sidamo Re Lower Tha      | 0 | 60  | N | Withdrawn   |
| 687683 | F | South Regi HE Qualific   | 0 | 120 | N | Pass        |
| 687688 | F | Afar Regio Lower Tha     | 0 | 120 | N | Pass        |
| 687769 | F | Afar Regio HE Qualific   | 0 | 120 | N | Pass        |
| 687822 | F | Afar Regio A Level or I  | 0 | 60  | N | Withdrawn   |
| 687977 | F | Somalia Re A Level or I  | 0 | 60  | N | Withdrawn   |
| 687978 | F | South Wes Lower Tha      | 0 | 60  | N | Withdrawn   |
| 688000 | F | Somalia Re A Level or I  | 0 | 120 | N | Withdrawn   |
| 688011 | F | Oromia Re A Level or I   | 0 | 60  | N | Pass        |
| 688106 | F | Sidamo Re A Level or I   | 0 | 60  | N | Withdrawn   |
| 688130 | F | Afar Regio Lower Tha     | 0 | 60  | Y | Pass        |
| 688135 | F | Amhara Re A Level or I   | 0 | 60  | N | Pass        |
| 688144 | F | Afar Regio A Level or I  | 0 | 60  | Y | Withdrawn   |
| 688167 | F | South Regi A Level or I  | 0 | 150 | N | Pass        |
| 688208 | M | South Wes Lower Tha      | 0 | 120 | N | Withdrawn   |
| 688263 | F | Addis Abak Lower Tha     | 0 | 60  | N | Fail        |
| 688301 | F | Tigrai Regi Lower Tha    | 0 | 60  | N | Fail        |
| 688376 | F | Afar Regio A Level or I  | 0 | 60  | N | Pass        |
| 688398 | F | Sidamo Re Lower Tha      | 0 | 60  | N | Fail        |
| 688513 | F | Amhara Re A Level or I   | 0 | 60  | N | Pass        |
| 688519 | M | Addis Abak Lower Tha     | 0 | 60  | N | Pass        |
| 688522 | F | Tigrai Regi Lower Tha    | 0 | 120 | N | Withdrawn   |
| 688545 | F | Afar Regio Lower Tha     | 0 | 60  | N | Withdrawn   |
| 688599 | F | Amhara Re Lower Tha      | 0 | 60  | N | Fail        |
| 688600 | F | Sidamo Re Lower Tha      | 0 | 120 | N | Withdrawn   |
| 688638 | F | South Wes Lower Tha      | 0 | 60  | N | Pass        |
| 688710 | F | Addis Abak A Level or I  | 0 | 120 | N | Withdrawn   |
| 688927 | F | Addis Abak Lower Tha     | 0 | 120 | N | Withdrawn   |

|        |   |                          |   |     |   |             |
|--------|---|--------------------------|---|-----|---|-------------|
| 688954 | M | South Regi Lower Tha     | 0 | 60  | N | Pass        |
| 688997 | F | Sidamo Re Lower Tha      | 0 | 180 | N | Withdrawn   |
| 689069 | F | Addis Abak A Level or I  | 0 | 60  | Y | Fail        |
| 689089 | F | South Wes Lower Tha      | 0 | 60  | N | Fail        |
| 689094 | F | South Wes A Level or I   | 0 | 60  | N | Pass        |
| 689095 | F | South Wes Lower Tha      | 0 | 60  | N | Pass        |
| 689097 | F | South Wes A Level or I   | 0 | 60  | N | Pass        |
| 689107 | F | South Wes Lower Tha      | 0 | 60  | N | Fail        |
| 689112 | F | South Wes Lower Tha      | 0 | 60  | N | Withdrawn   |
| 689113 | F | South Wes Lower Tha      | 0 | 60  | N | Pass        |
| 689124 | F | South Wes Lower Tha      | 0 | 60  | N | Pass        |
| 689129 | F | South Wes A Level or I   | 0 | 60  | N | Pass        |
| 689131 | F | Afar Regioi A Level or I | 0 | 60  | Y | Pass        |
| 689132 | F | South Wes Lower Tha      | 0 | 60  | N | Pass        |
| 689139 | F | South Wes Lower Tha      | 0 | 60  | N | Pass        |
| 689141 | M | South Wes A Level or I   | 0 | 60  | N | Pass        |
| 689147 | F | South Wes A Level or I   | 0 | 60  | N | Pass        |
| 689148 | F | South Wes A Level or I   | 0 | 60  | N | Distinction |
| 689157 | F | South Wes A Level or I   | 0 | 60  | N | Pass        |
| 689173 | F | South Wes Lower Tha      | 0 | 60  | N | Withdrawn   |
| 689178 | F | South Wes Lower Tha      | 0 | 60  | N | Fail        |
| 689180 | F | South Wes A Level or I   | 0 | 60  | N | Withdrawn   |
| 689185 | F | South Wes A Level or I   | 0 | 60  | N | Fail        |
| 689187 | F | Somalia Re Lower Tha     | 0 | 60  | N | Pass        |
| 689228 | F | South Wes Lower Tha      | 0 | 60  | N | Fail        |
| 689230 | F | South Wes A Level or I   | 0 | 120 | N | Pass        |
| 689265 | F | South Wes Lower Tha      | 0 | 60  | N | Pass        |
| 689267 | F | South Wes Lower Tha      | 0 | 60  | N | Pass        |
| 689274 | F | South Wes Lower Tha      | 0 | 60  | N | Pass        |
| 689287 | F | South Regi A Level or I  | 0 | 60  | N | Distinction |
| 689298 | M | Amhara Re Lower Tha      | 0 | 120 | Y | Fail        |
| 689329 | F | Sidamo Re Lower Tha      | 0 | 60  | Y | Fail        |
| 689333 | F | South Regi A Level or I  | 0 | 150 | N | Pass        |
| 689350 | F | South Regi Lower Tha     | 0 | 120 | N | Withdrawn   |
| 689397 | F | South Wes A Level or I   | 0 | 60  | N | Fail        |
| 689406 | M | Amhara Re Lower Tha      | 0 | 60  | N | Pass        |
| 689478 | F | Somalia Re Lower Tha     | 0 | 120 | N | Withdrawn   |
| 689487 | F | Addis Abak Lower Tha     | 0 | 60  | N | Fail        |
| 689493 | F | Afar Regioi A Level or I | 0 | 60  | N | Withdrawn   |
| 689563 | F | South Regi Lower Tha     | 0 | 120 | N | Pass        |
| 689628 | F | Sidamo Re Lower Tha      | 0 | 60  | N | Withdrawn   |
| 689662 | F | South Wes Lower Tha      | 0 | 60  | N | Pass        |
| 689665 | F | South Wes Lower Tha      | 0 | 60  | N | Pass        |
| 689727 | F | South Wes A Level or I   | 0 | 60  | Y | Pass        |
| 689768 | F | Sidamo Re A Level or I   | 0 | 60  | N | Pass        |
| 689775 | F | Sidamo Re Lower Tha      | 0 | 60  | N | Fail        |
| 689778 | F | South Regi Lower Tha     | 0 | 120 | N | Withdrawn   |

|        |   |                          |   |     |   |             |
|--------|---|--------------------------|---|-----|---|-------------|
| 689808 | F | Amhara Re A Level or I   | 0 | 120 | N | Withdrawn   |
| 689828 | M | South Regi A Level or I  | 0 | 60  | N | Pass        |
| 689896 | F | South Regi HE Qualific   | 0 | 60  | N | Withdrawn   |
| 689925 | F | Somalia Re Lower Than    | 0 | 60  | N | Withdrawn   |
| 689936 | F | Somalia Re A Level or I  | 0 | 60  | N | Pass        |
| 689952 | M | Sidamo Re A Level or I   | 0 | 120 | N | Withdrawn   |
| 689975 | F | South Wes Lower Than     | 0 | 60  | N | Pass        |
| 690003 | M | South Wes Lower Than     | 0 | 60  | N | Pass        |
| 690089 | F | South Wes Lower Than     | 0 | 60  | N | Pass        |
| 690102 | M | South Wes Lower Than     | 0 | 60  | N | Withdrawn   |
| 690116 | F | South Wes A Level or I   | 0 | 60  | N | Pass        |
| 690211 | F | South Regi A Level or I  | 0 | 120 | N | Pass        |
| 690235 | F | Amhara Re Lower Than     | 0 | 120 | N | Withdrawn   |
| 690318 | M | Tigrai Regi Lower Than   | 0 | 60  | N | Pass        |
| 690319 | F | Tigrai Regi HE Qualific  | 0 | 60  | N | Pass        |
| 690329 | F | Addis Abak Lower Than    | 0 | 120 | N | Withdrawn   |
| 690359 | F | Sidamo Re Post Gradu     | 0 | 120 | N | Distinction |
| 690366 | M | South Regi A Level or I  | 0 | 60  | N | Withdrawn   |
| 690384 | F | South Regi Lower Than    | 0 | 120 | N | Pass        |
| 690430 | M | South Regi Lower Than    | 0 | 60  | N | Withdrawn   |
| 690469 | F | Afar Regioi A Level or I | 0 | 60  | N | Pass        |
| 690548 | F | Sidamo Re A Level or I   | 0 | 60  | N | Fail        |
| 690554 | F | North Regi Lower Than    | 0 | 60  | N | Withdrawn   |
| 690766 | F | Oromia Re HE Qualific    | 0 | 120 | N | Pass        |
| 690767 | F | South Regi A Level or I  | 0 | 60  | N | Fail        |
| 690825 | F | Sidamo Re HE Qualific    | 0 | 120 | N | Withdrawn   |
| 690902 | F | Amhara Re Lower Than     | 0 | 180 | Y | Pass        |
| 690940 | F | Somalia Re Lower Than    | 0 | 60  | N | Withdrawn   |
| 690967 | F | Somalia Re Lower Than    | 0 | 60  | Y | Pass        |
| 691006 | F | Afar Regioi Lower Than   | 0 | 60  | N | Fail        |
| 691026 | F | Addis Abak A Level or I  | 0 | 60  | N | Pass        |
| 691028 | F | Somalia Re A Level or I  | 0 | 180 | N | Withdrawn   |
| 691094 | F | South Regi Lower Than    | 0 | 120 | N | Pass        |
| 691106 | F | Tigrai Regi A Level or I | 0 | 60  | N | Pass        |
| 691122 | M | Addis Abak A Level or I  | 0 | 60  | N | Pass        |
| 691272 | F | Addis Abak HE Qualific   | 0 | 120 | N | Withdrawn   |
| 691286 | F | North Regi Lower Than    | 0 | 60  | N | Withdrawn   |
| 691312 | F | South Wes A Level or I   | 0 | 60  | N | Pass        |
| 691343 | M | South Regi A Level or I  | 0 | 180 | N | Withdrawn   |
| 691353 | F | South Wes Lower Than     | 0 | 60  | N | Withdrawn   |
| 691367 | M | Oromia Re A Level or I   | 0 | 120 | N | Withdrawn   |
| 691411 | F | Addis Abak A Level or I  | 0 | 120 | N | Withdrawn   |
| 691413 | F | Tigrai Regi HE Qualific  | 0 | 60  | N | Distinction |
| 691509 | F | Sidamo Re A Level or I   | 0 | 120 | N | Withdrawn   |
| 691514 | F | Tigrai Regi Lower Than   | 0 | 60  | N | Pass        |
| 691663 | F | Somalia Re A Level or I  | 0 | 120 | N | Withdrawn   |
| 691683 | F | Somalia Re Lower Than    | 0 | 60  | N | Pass        |

|        |   |                          |   |     |   |             |
|--------|---|--------------------------|---|-----|---|-------------|
| 691717 | F | Addis Abat A Level or I  | 0 | 60  | N | Pass        |
| 691815 | F | Addis Abat A Level or I  | 0 | 90  | N | Withdrawn   |
| 691835 | M | Amhara Re HE Qualific    | 0 | 120 | N | Distinction |
| 691851 | M | South Regi A Level or I  | 0 | 60  | N | Pass        |
| 691856 | F | South Regi A Level or I  | 0 | 60  | N | Pass        |
| 691867 | F | Sidamo Re A Level or I   | 0 | 60  | N | Withdrawn   |
| 691869 | F | North Regi Lower Tha     | 0 | 60  | N | Pass        |
| 691907 | F | South Wes HE Qualific    | 0 | 60  | N | Pass        |
| 691997 | F | Sidamo Re A Level or I   | 0 | 60  | N | Fail        |
| 692164 | F | Afar Regio Lower Tha     | 0 | 60  | Y | Pass        |
| 692175 | F | Afar Regio Lower Tha     | 0 | 60  | N | Fail        |
| 692181 | F | Tigrai Regi HE Qualific  | 0 | 120 | N | Pass        |
| 692196 | F | Tigrai Regi HE Qualific  | 0 | 120 | N | Distinction |
| 692207 | F | South Wes Lower Tha      | 0 | 60  | N | Pass        |
| 692215 | F | South Regi HE Qualific   | 0 | 120 | N | Distinction |
| 692355 | F | Afar Regio A Level or I  | 0 | 120 | N | Pass        |
| 692384 | F | Addis Abat Lower Tha     | 0 | 60  | Y | Withdrawn   |
| 692392 | F | Oromia Re Lower Tha      | 0 | 120 | N | Withdrawn   |
| 692473 | F | Tigrai Regi Lower Tha    | 0 | 60  | N | Pass        |
| 692474 | F | Tigrai Regi Lower Tha    | 0 | 60  | N | Fail        |
| 692479 | F | Tigrai Regi Lower Tha    | 0 | 60  | N | Withdrawn   |
| 692482 | M | Tigrai Regi Lower Tha    | 0 | 60  | N | Fail        |
| 692484 | F | Tigrai Regi HE Qualific  | 0 | 60  | N | Pass        |
| 692496 | F | Tigrai Regi Lower Tha    | 0 | 60  | N | Fail        |
| 692502 | F | Amhara Re HE Qualific    | 0 | 60  | N | Pass        |
| 692515 | F | Tigrai Regi Lower Tha    | 0 | 60  | N | Fail        |
| 692518 | F | Tigrai Regi A Level or I | 0 | 60  | N | Pass        |
| 692521 | F | Tigrai Regi A Level or I | 0 | 60  | N | Fail        |
| 692522 | F | Tigrai Regi A Level or I | 0 | 60  | N | Pass        |
| 692525 | M | Tigrai Regi A Level or I | 0 | 60  | N | Fail        |
| 692528 | F | Tigrai Regi Lower Tha    | 0 | 60  | N | Withdrawn   |
| 692532 | F | Tigrai Regi HE Qualific  | 0 | 60  | N | Withdrawn   |
| 692537 | F | Tigrai Regi A Level or I | 0 | 60  | N | Withdrawn   |
| 692540 | M | Tigrai Regi A Level or I | 0 | 60  | N | Withdrawn   |
| 692542 | F | Tigrai Regi A Level or I | 0 | 60  | N | Withdrawn   |
| 692544 | F | Tigrai Regi Lower Tha    | 0 | 60  | N | Pass        |
| 692547 | F | Tigrai Regi Lower Tha    | 0 | 60  | N | Fail        |
| 692553 | F | Tigrai Regi Lower Tha    | 0 | 60  | Y | Fail        |
| 692572 | F | Sidamo Re Lower Tha      | 0 | 60  | N | Pass        |
| 692609 | F | South Regi A Level or I  | 0 | 60  | Y | Distinction |
| 692625 | F | South Regi A Level or I  | 0 | 60  | N | Withdrawn   |
| 692629 | M | Somalia Re Lower Tha     | 0 | 60  | N | Withdrawn   |
| 692647 | F | Tigrai Regi Lower Tha    | 0 | 90  | N | Withdrawn   |
| 692805 | F | Afar Regio Lower Tha     | 0 | 60  | N | Pass        |
| 692826 | F | South Regi Lower Tha     | 0 | 60  | N | Fail        |
| 692827 | F | Oromia Re HE Qualific    | 0 | 60  | N | Pass        |
| 692855 | F | Afar Regio A Level or I  | 0 | 120 | N | Withdrawn   |



|        |   |                          |   |     |   |             |
|--------|---|--------------------------|---|-----|---|-------------|
| 692871 | F | South Regi Lower Tha     | 0 | 60  | N | Withdrawn   |
| 692897 | F | Addis Abak Lower Tha     | 0 | 60  | N | Withdrawn   |
| 692907 | F | South Regi HE Qualific   | 0 | 60  | N | Pass        |
| 692908 | F | Addis Abak A Level or I  | 0 | 120 | N | Pass        |
| 692914 | F | South Regi A Level or I  | 0 | 120 | N | Withdrawn   |
| 692918 | F | North Regi A Level or I  | 0 | 120 | N | Pass        |
| 692920 | F | Oromia Re A Level or I   | 0 | 60  | N | Pass        |
| 692936 | F | Tigrai Regi Lower Tha    | 0 | 60  | N | Fail        |
| 692943 | F | Tigrai Regi Lower Tha    | 0 | 60  | N | Pass        |
| 692961 | F | Addis Abak A Level or I  | 0 | 120 | N | Withdrawn   |
| 693091 | F | Tigrai Regi A Level or I | 0 | 120 | N | Pass        |
| 693098 | M | Oromia Re A Level or I   | 0 | 60  | N | Pass        |
| 693116 | M | Addis Abak Lower Tha     | 0 | 120 | N | Withdrawn   |
| 693127 | M | Addis Abak A Level or I  | 0 | 120 | N | Withdrawn   |
| 693213 | F | Afar Regi HE Qualific    | 0 | 60  | N | Distinction |
| 693230 | F | South Wes Lower Tha      | 0 | 60  | N | Pass        |
| 693269 | F | South Regi A Level or I  | 0 | 90  | Y | Withdrawn   |
| 693297 | F | Sidamo Re Lower Tha      | 0 | 120 | N | Fail        |
| 693333 | M | Addis Abak Lower Tha     | 0 | 120 | N | Withdrawn   |
| 693352 | F | South Wes Lower Tha      | 0 | 60  | N | Withdrawn   |
| 693380 | M | South Regi HE Qualific   | 0 | 60  | N | Pass        |
| 693514 | F | South Wes Lower Tha      | 0 | 120 | N | Pass        |
| 693615 | M | Sidamo Re Lower Tha      | 0 | 60  | N | Withdrawn   |
| 693620 | F | Addis Abak A Level or I  | 0 | 60  | N | Withdrawn   |
| 693635 | M | South Regi A Level or I  | 0 | 60  | N | Fail        |
| 693643 | F | Sidamo Re No Formal      | 0 | 60  | N | Withdrawn   |
| 693682 | F | Addis Abak Lower Tha     | 0 | 60  | N | Pass        |
| 693692 | F | North Regi A Level or I  | 0 | 60  | N | Fail        |
| 693709 | F | South Regi Lower Tha     | 0 | 60  | N | Withdrawn   |
| 693744 | F | Sidamo Re No Formal      | 0 | 60  | N | Withdrawn   |
| 693752 | F | South Wes Lower Tha      | 0 | 60  | N | Pass        |
| 693793 | F | Addis Abak Lower Tha     | 0 | 60  | N | Pass        |
| 693871 | F | Afar Regi Lower Tha      | 0 | 120 | N | Fail        |
| 693899 | F | Amhara Re Lower Tha      | 0 | 60  | N | Fail        |
| 693934 | F | Afar Regi Lower Tha      | 0 | 120 | N | Withdrawn   |
| 693983 | F | South Regi Lower Tha     | 0 | 60  | N | Withdrawn   |
| 694001 | F | South Regi A Level or I  | 0 | 180 | N | Withdrawn   |
| 694003 | F | Amhara Re Lower Tha      | 0 | 60  | N | Withdrawn   |
| 694078 | F | Addis Abak Lower Tha     | 0 | 90  | N | Pass        |
| 694155 | F | Tigrai Regi A Level or I | 0 | 120 | N | Fail        |
| 694190 | M | Tigrai Regi A Level or I | 0 | 60  | Y | Pass        |
| 694222 | F | Oromia Re Lower Tha      | 0 | 60  | N | Withdrawn   |
| 694329 | F | South Wes HE Qualific    | 0 | 60  | N | Withdrawn   |
| 694338 | F | South Regi HE Qualific   | 0 | 60  | N | Pass        |
| 694339 | F | South Wes A Level or I   | 0 | 60  | N | Withdrawn   |
| 694341 | F | South Wes Lower Tha      | 0 | 60  | N | Pass        |
| 694342 | F | South Regi HE Qualific   | 0 | 60  | N | Pass        |

|        |   |             |              |   |     |   |             |
|--------|---|-------------|--------------|---|-----|---|-------------|
| 694349 | F | Afar Region | A Level or I | 0 | 60  | N | Pass        |
| 694380 | F | South Wes   | HE Qualific  | 0 | 60  | N | Withdrawn   |
| 694404 | F | Addis Abab  | Lower Than   | 0 | 60  | N | Fail        |
| 694448 | F | Somalia Re  | A Level or I | 0 | 60  | N | Withdrawn   |
| 694458 | F | Sidamo Re   | A Level or I | 0 | 60  | N | Withdrawn   |
| 694473 | F | South Wes   | Lower Than   | 0 | 60  | N | Pass        |
| 694476 | M | South Wes   | A Level or I | 0 | 60  | N | Withdrawn   |
| 694490 | F | South Wes   | A Level or I | 0 | 60  | N | Pass        |
| 694526 | F | South Wes   | Lower Than   | 0 | 60  | N | Pass        |
| 694554 | F | Addis Abab  | A Level or I | 0 | 120 | Y | Withdrawn   |
| 694561 | F | Somalia Re  | A Level or I | 0 | 60  | N | Pass        |
| 694576 | F | Addis Abab  | A Level or I | 0 | 60  | N | Fail        |
| 694616 | F | South Regi  | Lower Than   | 0 | 120 | N | Withdrawn   |
| 694682 | F | Somalia Re  | Lower Than   | 0 | 180 | Y | Withdrawn   |
| 694706 | F | North Regi  | A Level or I | 0 | 60  | N | Pass        |
| 694792 | F | Addis Abab  | Lower Than   | 0 | 120 | N | Pass        |
| 694823 | M | Afar Region | HE Qualific  | 0 | 60  | N | Pass        |
| 694857 | F | South Regi  | Lower Than   | 0 | 60  | N | Fail        |
| 694951 | M | Sidamo Re   | A Level or I | 0 | 120 | N | Withdrawn   |
| 694974 | F | South Regi  | Lower Than   | 0 | 120 | N | Withdrawn   |
| 694981 | M | South Wes   | A Level or I | 0 | 60  | N | Pass        |
| 694983 | F | South Regi  | Lower Than   | 0 | 60  | N | Pass        |
| 695001 | M | South Wes   | Lower Than   | 0 | 60  | N | Pass        |
| 695014 | F | South Wes   | Lower Than   | 0 | 60  | N | Pass        |
| 695015 | F | South Wes   | A Level or I | 0 | 60  | N | Fail        |
| 695021 | F | South Wes   | A Level or I | 0 | 60  | N | Pass        |
| 695027 | F | South Wes   | A Level or I | 0 | 60  | N | Pass        |
| 695031 | F | South Wes   | HE Qualific  | 0 | 60  | N | Pass        |
| 695035 | M | South Wes   | A Level or I | 0 | 60  | N | Withdrawn   |
| 695044 | F | South Wes   | A Level or I | 0 | 60  | N | Pass        |
| 695047 | F | South Wes   | Lower Than   | 0 | 60  | N | Pass        |
| 695049 | M | South Wes   | Lower Than   | 0 | 60  | Y | Pass        |
| 695051 | F | South Wes   | A Level or I | 0 | 120 | N | Withdrawn   |
| 695054 | F | South Wes   | A Level or I | 0 | 60  | N | Distinction |
| 695070 | F | South Wes   | Lower Than   | 0 | 60  | N | Pass        |
| 695075 | F | South Wes   | A Level or I | 0 | 60  | N | Pass        |
| 695084 | F | South Wes   | A Level or I | 0 | 60  | N | Pass        |
| 695125 | F | South Wes   | Lower Than   | 0 | 60  | N | Withdrawn   |
| 695144 | F | South Wes   | A Level or I | 0 | 60  | N | Pass        |
| 695148 | F | South Wes   | Lower Than   | 0 | 60  | N | Pass        |
| 695186 | F | Tigray Regi | A Level or I | 0 | 60  | N | Fail        |
| 695205 | M | South Wes   | A Level or I | 0 | 60  | N | Distinction |
| 695235 | F | South Wes   | Lower Than   | 0 | 60  | N | Pass        |
| 695247 | F | South Wes   | A Level or I | 0 | 60  | N | Distinction |
| 695256 | F | South Wes   | Lower Than   | 0 | 60  | N | Pass        |
| 695259 | M | South Wes   | A Level or I | 0 | 60  | N | Pass        |
| 695278 | F | South Wes   | Lower Than   | 0 | 60  | N | Pass        |

|        |   |                          |   |     |   |             |
|--------|---|--------------------------|---|-----|---|-------------|
| 695298 | M | Sidamo Re Lower Tha      | 0 | 60  | N | Withdrawn   |
| 695356 | F | South Regi Lower Tha     | 0 | 60  | Y | Withdrawn   |
| 695405 | F | Oromia Re Lower Tha      | 0 | 60  | Y | Fail        |
| 695411 | F | South Regi Lower Tha     | 0 | 120 | N | Withdrawn   |
| 695434 | F | Somalia Re HE Qualific   | 0 | 60  | N | Fail        |
| 695461 | M | South Wes Lower Tha      | 0 | 60  | N | Withdrawn   |
| 695475 | F | South Wes A Level or I   | 0 | 60  | N | Distinction |
| 695484 | M | South Wes A Level or I   | 0 | 60  | N | Pass        |
| 695510 | F | South Wes A Level or I   | 0 | 60  | N | Pass        |
| 695516 | F | Addis Abak Lower Tha     | 0 | 60  | N | Withdrawn   |
| 695528 | F | South Wes A Level or I   | 0 | 60  | N | Withdrawn   |
| 695535 | F | South Wes Lower Tha      | 0 | 60  | N | Pass        |
| 695613 | F | Sidamo Re A Level or I   | 0 | 60  | N | Pass        |
| 695631 | M | Amhara Re A Level or I   | 0 | 60  | Y | Pass        |
| 695654 | F | South Regi A Level or I  | 0 | 60  | N | Pass        |
| 695695 | F | Amhara Re HE Qualific    | 0 | 60  | N | Withdrawn   |
| 695941 | F | Sidamo Re No Formal      | 0 | 60  | N | Withdrawn   |
| 695972 | F | South Wes A Level or I   | 0 | 60  | N | Pass        |
| 695981 | F | Somalia Re Lower Tha     | 0 | 60  | N | Withdrawn   |
| 695982 | F | Somalia Re Lower Tha     | 0 | 60  | N | Withdrawn   |
| 696007 | F | Addis Abak A Level or I  | 0 | 60  | N | Pass        |
| 696152 | F | Sidamo Re Lower Tha      | 0 | 60  | N | Pass        |
| 696203 | M | South Wes Lower Tha      | 0 | 60  | N | Pass        |
| 696301 | F | South Wes A Level or I   | 0 | 60  | N | Pass        |
| 696316 | F | North Regi A Level or I  | 0 | 120 | N | Withdrawn   |
| 696348 | F | South Wes Lower Tha      | 0 | 60  | Y | Fail        |
| 696440 | F | South Wes A Level or I   | 0 | 60  | N | Pass        |
| 696481 | F | South Regi A Level or I  | 0 | 60  | N | Withdrawn   |
| 696527 | M | Tigrai Regi Lower Tha    | 0 | 120 | Y | Withdrawn   |
| 696569 | F | South Wes Lower Tha      | 0 | 60  | N | Fail        |
| 696595 | M | Addis Abak Lower Tha     | 0 | 60  | N | Withdrawn   |
| 696616 | F | Oromia Re HE Qualific    | 0 | 120 | N | Pass        |
| 696634 | F | South Regi A Level or I  | 0 | 60  | Y | Withdrawn   |
| 696684 | F | Amhara Re Lower Tha      | 0 | 120 | N | Pass        |
| 696692 | F | Tigrai Regi A Level or I | 0 | 60  | N | Withdrawn   |
| 696716 | M | Addis Abak Lower Tha     | 0 | 120 | N | Withdrawn   |
| 696724 | F | Amhara Re Lower Tha      | 0 | 60  | N | Pass        |
| 696799 | F | Sidamo Re HE Qualific    | 0 | 60  | N | Fail        |
| 696803 | F | South Wes HE Qualific    | 0 | 120 | N | Withdrawn   |
| 696804 | F | Tigrai Regi A Level or I | 0 | 60  | N | Pass        |
| 696844 | F | Addis Abak HE Qualific   | 0 | 120 | N | Pass        |
| 696850 | F | Tigrai Regi HE Qualific  | 0 | 120 | N | Distinction |
| 696890 | F | Afar Regi A Level or I   | 0 | 120 | N | Withdrawn   |
| 697065 | F | Oromia Re Lower Tha      | 0 | 60  | Y | Withdrawn   |
| 697119 | F | South Regi A Level or I  | 0 | 60  | N | Withdrawn   |
| 697136 | F | Oromia Re Lower Tha      | 0 | 120 | N | Withdrawn   |
| 697148 | F | Tigrai Regi A Level or I | 0 | 60  | N | Withdrawn   |

|        |   |                          |   |     |   |             |
|--------|---|--------------------------|---|-----|---|-------------|
| 697298 | F | Sidamo Re A Level or I   | 0 | 120 | N | Withdrawn   |
| 697319 | F | Addis Abak Lower Tha     | 0 | 60  | N | Withdrawn   |
| 697337 | F | Addis Abak No Formal     | 0 | 60  | N | Withdrawn   |
| 697345 | F | North Regi A Level or I  | 0 | 60  | N | Fail        |
| 697417 | M | South Regi Lower Tha     | 0 | 60  | N | Pass        |
| 697428 | M | Somalia Re Lower Tha     | 0 | 60  | N | Fail        |
| 697514 | F | Addis Abak Lower Tha     | 0 | 60  | N | Withdrawn   |
| 697525 | M | South Regi Lower Tha     | 0 | 60  | N | Fail        |
| 697542 | F | Amhara Re Lower Tha      | 0 | 60  | N | Fail        |
| 697561 | F | Addis Abak Lower Tha     | 0 | 60  | N | Fail        |
| 697562 | F | North Regi Lower Tha     | 0 | 120 | N | Pass        |
| 697574 | M | South Regi A Level or I  | 0 | 60  | N | Pass        |
| 697578 | F | South Regi A Level or I  | 0 | 60  | N | Distinction |
| 697649 | F | Amhara Re Lower Tha      | 0 | 60  | N | Pass        |
| 697653 | F | Afar Regio A Level or I  | 0 | 120 | N | Withdrawn   |
| 697754 | F | South Wes A Level or I   | 0 | 120 | N | Distinction |
| 697857 | F | South Wes Lower Tha      | 0 | 60  | N | Pass        |
| 697868 | F | Sidamo Re A Level or I   | 0 | 150 | N | Withdrawn   |
| 697893 | F | Addis Abak Lower Tha     | 0 | 120 | N | Withdrawn   |
| 697909 | F | South Regi Lower Tha     | 0 | 60  | N | Withdrawn   |
| 697912 | M | Amhara Re Lower Tha      | 0 | 120 | N | Fail        |
| 697959 | F | Tigrai Regi A Level or I | 0 | 60  | N | Pass        |
| 697960 | F | Tigrai Regi Lower Tha    | 0 | 60  | N | Pass        |
| 697964 | F | Tigrai Regi A Level or I | 0 | 60  | N | Distinction |
| 698010 | F | Sidamo Re Lower Tha      | 0 | 60  | N | Fail        |
| 698025 | F | North Regi Lower Tha     | 0 | 60  | N | Withdrawn   |
| 698170 | F | South Regi HE Qualific   | 0 | 120 | N | Distinction |
| 698180 | F | Somalia Re A Level or I  | 0 | 60  | N | Pass        |
| 698198 | F | Tigrai Regi Lower Tha    | 0 | 60  | N | Fail        |
| 698199 | F | Tigrai Regi A Level or I | 0 | 60  | N | Pass        |
| 698200 | F | Tigrai Regi Lower Tha    | 0 | 60  | N | Fail        |
| 698201 | F | Tigrai Regi Lower Tha    | 0 | 60  | N | Pass        |
| 698203 | F | Tigrai Regi HE Qualific  | 0 | 60  | N | Pass        |
| 698204 | F | Tigrai Regi Lower Tha    | 0 | 60  | N | Pass        |
| 698205 | F | Tigrai Regi Lower Tha    | 0 | 60  | N | Withdrawn   |
| 698206 | F | Tigrai Regi Lower Tha    | 0 | 60  | N | Pass        |
| 698207 | F | Tigrai Regi HE Qualific  | 0 | 60  | N | Distinction |
| 698208 | F | Tigrai Regi A Level or I | 0 | 60  | N | Fail        |
| 698256 | F | South Regi Lower Tha     | 0 | 60  | N | Distinction |
| 698345 | F | North Regi Lower Tha     | 0 | 60  | N | Pass        |
| 698352 | F | Sidamo Re A Level or I   | 0 | 60  | N | Withdrawn   |
| 698357 | F | South Regi A Level or I  | 0 | 60  | N | Withdrawn   |
| 698362 | F | North Regi HE Qualific   | 0 | 120 | N | Distinction |
| 698369 | F | Sidamo Re A Level or I   | 0 | 120 | N | Distinction |
| 698420 | F | Somalia Re HE Qualific   | 0 | 120 | N | Distinction |
| 698432 | F | Oromia Re Lower Tha      | 0 | 60  | N | Withdrawn   |
| 698463 | F | Somalia Re HE Qualific   | 0 | 120 | N | Distinction |

|         |   |                          |   |     |   |             |
|---------|---|--------------------------|---|-----|---|-------------|
| 698471  | F | South Regi HE Qualific   | 0 | 120 | N | Distinction |
| 698490  | F | South Regi A Level or I  | 0 | 60  | N | Withdrawn   |
| 698494  | F | North Regi A Level or I  | 0 | 60  | N | Pass        |
| 698498  | F | Somalia Re A Level or I  | 0 | 60  | N | Withdrawn   |
| 698507  | F | Tigrai Regi HE Qualific  | 0 | 120 | N | Distinction |
| 698509  | F | Tigrai Regi HE Qualific  | 0 | 120 | N | Distinction |
| 698586  | F | Sidamo Re Lower Than     | 0 | 120 | Y | Withdrawn   |
| 699007  | F | Sidamo Re A Level or I   | 0 | 120 | N | Distinction |
| 699153  | F | Tigrai Regi Lower Than   | 0 | 60  | N | Pass        |
| 699435  | F | Somalia Re HE Qualific   | 0 | 120 | N | Pass        |
| 699436  | F | Somalia Re HE Qualific   | 0 | 120 | N | Distinction |
| 699437  | F | Somalia Re HE Qualific   | 0 | 120 | N | Pass        |
| 699488  | F | Tigrai Regi A Level or I | 0 | 120 | N | Distinction |
| 699493  | F | South Regi Lower Than    | 0 | 120 | N | Withdrawn   |
| 699498  | F | Sidamo Re Lower Than     | 0 | 60  | N | Pass        |
| 699503  | F | South Wes Lower Than     | 0 | 60  | N | Pass        |
| 699651  | F | Sidamo Re HE Qualific    | 0 | 120 | N | Distinction |
| 699656  | M | Sidamo Re HE Qualific    | 0 | 120 | N | Distinction |
| 699875  | F | South Wes Lower Than     | 0 | 60  | N | Withdrawn   |
| 700079  | M | South Regi A Level or I  | 0 | 120 | N | Distinction |
| 700086  | F | Tigrai Regi Lower Than   | 0 | 60  | N | Pass        |
| 700441  | F | South Regi HE Qualific   | 0 | 120 | N | Pass        |
| 700458  | F | Tigrai Regi HE Qualific  | 0 | 60  | N | Fail        |
| 700815  | M | Addis Abak HE Qualific   | 0 | 120 | N | Fail        |
| 700820  | F | South Regi HE Qualific   | 0 | 120 | N | Distinction |
| 1118432 | F | Amhara Re HE Qualific    | 0 | 60  | N | Distinction |
| 1419671 | F | South Regi Lower Than    | 0 | 60  | N | Fail        |
| 1432518 | M | Afar Regio Lower Than    | 0 | 120 | Y | Fail        |
| 1453140 | M | Somalia Re A Level or I  | 1 | 90  | N | Withdrawn   |
| 1486048 | F | Somalia Re HE Qualific   | 0 | 120 | N | Withdrawn   |
| 1526770 | F | South Wes Lower Than     | 0 | 90  | N | Distinction |
| 1533277 | F | Sidamo Re Lower Than     | 0 | 60  | N | Pass        |
| 1536122 | F | South Wes A Level or I   | 1 | 120 | N | Distinction |
| 1536591 | F | Sidamo Re Lower Than     | 2 | 120 | N | Fail        |
| 1547646 | F | Sidamo Re A Level or I   | 0 | 60  | N | Distinction |
| 1560989 | F | Afar Regio HE Qualific   | 1 | 150 | Y | Fail        |
| 1563696 | F | Somalia Re A Level or I  | 0 | 60  | N | Pass        |
| 1564706 | M | Tigrai Regi HE Qualific  | 0 | 60  | N | Pass        |
| 1585768 | F | Tigrai Regi A Level or I | 0 | 60  | N | Fail        |
| 1623795 | F | Tigrai Regi Lower Than   | 0 | 60  | N | Distinction |
| 1656979 | M | South Regi A Level or I  | 0 | 60  | N | Distinction |
| 1664280 | F | Addis Abak A Level or I  | 0 | 60  | N | Pass        |
| 1723749 | F | South Regi A Level or I  | 0 | 120 | N | Pass        |
| 1732956 | F | Tigrai Regi No Formal    | 0 | 120 | N | Pass        |
| 1733023 | F | Afar Regio HE Qualific   | 0 | 60  | Y | Distinction |
| 1752834 | F | Somalia Re Lower Than    | 0 | 180 | N | Pass        |
| 1757561 | F | Afar Regio Lower Than    | 1 | 60  | N | Fail        |

|         |   |                          |   |     |   |             |
|---------|---|--------------------------|---|-----|---|-------------|
| 1784816 | F | South Regi A Level or I  | 0 | 120 | N | Pass        |
| 1813493 | M | Sidamo Re Lower Thar     | 0 | 60  | N | Fail        |
| 1832218 | F | Afar Regio HE Qualific   | 1 | 60  | N | Pass        |
| 1835389 | F | Amhara Re HE Qualific    | 0 | 60  | N | Pass        |
| 1843123 | F | Afar Regio HE Qualific   | 0 | 60  | N | Pass        |
| 1874935 | F | South Regi A Level or I  | 0 | 120 | N | Distinction |
| 1888723 | F | Amhara Re Lower Thar     | 0 | 60  | N | Withdrawn   |
| 1891028 | F | South Regi A Level or I  | 1 | 60  | N | Fail        |
| 1903095 | F | Addis Abak Lower Thar    | 0 | 60  | N | Pass        |
| 1926542 | F | Afar Regio Post Gradu    | 0 | 60  | N | Pass        |
| 1928536 | F | Sidamo Re Lower Thar     | 0 | 60  | N | Withdrawn   |
| 1929491 | F | Somalia Re HE Qualific   | 0 | 60  | N | Withdrawn   |
| 1937822 | F | North Regi HE Qualific   | 0 | 60  | N | Distinction |
| 1972832 | F | Tigrai Regi A Level or I | 0 | 120 | N | Distinction |
| 1989014 | F | Afar Regio HE Qualific   | 0 | 60  | N | Pass        |
| 1993672 | F | South Regi Lower Thar    | 5 | 60  | Y | Fail        |
| 2003628 | F | South Regi A Level or I  | 0 | 60  | N | Withdrawn   |
| 2009239 | F | Oromia Re A Level or I   | 2 | 120 | N | Pass        |
| 2035574 | F | Somalia Re Lower Thar    | 0 | 120 | N | Pass        |
| 2045569 | F | Sidamo Re Lower Thar     | 0 | 60  | N | Withdrawn   |
| 2049740 | F | Sidamo Re Lower Thar     | 0 | 60  | N | Fail        |
| 2051809 | M | Sidamo Re HE Qualific    | 0 | 120 | N | Withdrawn   |
| 2091096 | M | South Regi Lower Thar    | 0 | 60  | N | Pass        |
| 2091193 | M | South Regi Lower Thar    | 0 | 60  | N | Pass        |
| 2093092 | F | Addis Abak HE Qualific   | 0 | 120 | N | Withdrawn   |
| 2103305 | F | Addis Abak Lower Thar    | 0 | 120 | Y | Withdrawn   |
| 2108914 | F | Somalia Re Lower Thar    | 0 | 120 | N | Withdrawn   |
| 2115250 | F | Amhara Re Lower Thar     | 0 | 60  | N | Distinction |
| 2145101 | F | Afar Regio Lower Thar    | 0 | 120 | N | Withdrawn   |
| 2149487 | F | Afar Regio HE Qualific   | 0 | 60  | N | Pass        |
| 2159336 | F | South Wes A Level or I   | 1 | 60  | N | Withdrawn   |
| 2169127 | F | South Wes A Level or I   | 0 | 60  | N | Withdrawn   |
| 2172163 | F | South Wes Lower Thar     | 1 | 120 | N | Pass        |
| 2177423 | F | Addis Abak Lower Thar    | 3 | 60  | N | Withdrawn   |
| 2187308 | F | Amhara Re HE Qualific    | 0 | 120 | N | Pass        |
| 2192113 | M | Afar Regio HE Qualific   | 1 | 60  | Y | Withdrawn   |
| 2207474 | F | South Wes Lower Thar     | 0 | 60  | N | Pass        |
| 2213814 | F | South Wes Lower Thar     | 0 | 60  | Y | Withdrawn   |
| 2216682 | M | South Wes A Level or I   | 0 | 60  | N | Pass        |
| 2216778 | F | Addis Abak A Level or I  | 0 | 60  | N | Pass        |
| 2218789 | F | Addis Abak A Level or I  | 0 | 120 | N | Withdrawn   |
| 2227568 | F | Sidamo Re Lower Thar     | 0 | 60  | N | Distinction |
| 2228010 | F | Afar Regio Lower Thar    | 0 | 60  | N | Pass        |
| 2228601 | F | South Wes A Level or I   | 0 | 120 | N | Distinction |
| 2229783 | F | Sidamo Re HE Qualific    | 1 | 60  | N | Pass        |
| 2232976 | F | Tigrai Regi A Level or I | 0 | 60  | Y | Withdrawn   |
| 2237567 | F | Oromia Re A Level or I   | 0 | 90  | N | Withdrawn   |

|         |   |                         |   |     |   |             |
|---------|---|-------------------------|---|-----|---|-------------|
| 2239766 | F | Somalia Re Lower Than   | 0 | 120 | N | Withdrawn   |
| 2241250 | F | Afar Region Lower Than  | 0 | 60  | N | Fail        |
| 2242067 | F | Sidamo Re HE Qualific   | 0 | 60  | N | Pass        |
| 2248243 | F | South Wes Lower Than    | 0 | 60  | N | Pass        |
| 2251500 | M | Amhara Re Lower Than    | 0 | 60  | Y | Fail        |
| 2263129 | F | Afar Region A Level or  | 0 | 120 | N | Fail        |
| 2264569 | F | Sidamo Re A Level or    | 0 | 60  | N | Withdrawn   |
| 2269561 | F | South Wes HE Qualific   | 0 | 60  | N | Fail        |
| 2276854 | F | South Regi Lower Than   | 3 | 180 | N | Withdrawn   |
| 2278390 | M | South Regi A Level or   | 0 | 60  | N | Fail        |
| 2281286 | F | South Wes Lower Than    | 0 | 60  | N | Pass        |
| 2285017 | F | Afar Region A Level or  | 0 | 60  | N | Withdrawn   |
| 2292824 | M | South Regi Lower Than   | 0 | 60  | N | Withdrawn   |
| 2296716 | F | Tigrai Regi A Level or  | 0 | 60  | N | Fail        |
| 2299745 | F | Afar Region HE Qualific | 0 | 60  | N | Fail        |
| 2318161 | F | South Regi A Level or   | 0 | 60  | N | Pass        |
| 2321660 | M | South Regi Lower Than   | 0 | 60  | N | Pass        |
| 2326401 | F | South Regi Lower Than   | 0 | 60  | N | Withdrawn   |
| 2333415 | F | Afar Region A Level or  | 0 | 120 | N | Pass        |
| 2344216 | M | Sidamo Re Lower Than    | 0 | 120 | N | Withdrawn   |
| 2346145 | F | Amhara Re A Level or    | 0 | 60  | N | Pass        |
| 2349805 | F | Addis Abat Lower Than   | 0 | 60  | N | Fail        |
| 2353764 | F | South Regi Lower Than   | 0 | 120 | N | Pass        |
| 2357372 | F | Somalia Re Lower Than   | 0 | 180 | N | Withdrawn   |
| 2363168 | F | Addis Abat A Level or   | 0 | 60  | N | Pass        |
| 2375759 | F | Amhara Re Lower Than    | 1 | 60  | N | Distinction |
| 2385665 | F | Addis Abat Lower Than   | 0 | 60  | N | Pass        |
| 2386867 | F | South Wes Lower Than    | 1 | 60  | N | Withdrawn   |
| 2394741 | F | Addis Abat Lower Than   | 1 | 60  | N | Fail        |
| 2399380 | F | South Wes Lower Than    | 0 | 180 | Y | Withdrawn   |
| 2401304 | F | South Wes Lower Than    | 1 | 60  | N | Pass        |
| 2407594 | F | Sidamo Re A Level or    | 0 | 120 | N | Pass        |
| 2410544 | M | Tigrai Regi HE Qualific | 0 | 60  | N | Pass        |
| 2414945 | M | Afar Region A Level or  | 0 | 60  | Y | Fail        |
| 2423078 | M | Sidamo Re A Level or    | 2 | 60  | N | Fail        |
| 2426442 | F | North Regi A Level or   | 0 | 60  | N | Withdrawn   |
| 2426864 | F | Somalia Re A Level or   | 0 | 60  | N | Pass        |
| 2428341 | F | Oromia Re A Level or    | 0 | 60  | N | Pass        |
| 2432551 | M | Afar Region A Level or  | 0 | 60  | N | Fail        |
| 2436711 | F | Somalia Re A Level or   | 0 | 60  | N | Pass        |
| 2444705 | F | Amhara Re Lower Than    | 3 | 60  | N | Pass        |
| 2446694 | M | Afar Region Lower Than  | 0 | 60  | N | Fail        |
| 2448699 | F | Addis Abat A Level or   | 0 | 120 | N | Fail        |
| 2449399 | F | Somalia Re HE Qualific  | 0 | 60  | N | Pass        |
| 2454351 | F | Addis Abat Lower Than   | 0 | 90  | N | Withdrawn   |
| 2459279 | F | Oromia Re A Level or    | 0 | 120 | N | Fail        |
| 2462576 | F | Afar Region HE Qualific | 1 | 60  | N | Pass        |

|         |   |             |              |   |     |   |             |
|---------|---|-------------|--------------|---|-----|---|-------------|
| 2464901 | F | Sidamo Re   | A Level or I | 0 | 120 | Y | Withdrawn   |
| 2475591 | F | Sidamo Re   | HE Qualific  | 0 | 120 | N | Pass        |
| 2482994 | F | South Regi  | Lower Thar   | 1 | 60  | N | Fail        |
| 2486159 | F | Tigrai Regi | A Level or I | 1 | 60  | N | Pass        |
| 2487430 | F | Tigrai Regi | A Level or I | 0 | 60  | N | Pass        |
| 2487573 | F | Oromia Re   | Lower Thar   | 0 | 150 | N | Pass        |
| 2494258 | F | Addis Abat  | A Level or I | 1 | 60  | N | Pass        |
| 2497189 | F | Afar Regio  | A Level or I | 1 | 120 | Y | Withdrawn   |
| 2497624 | F | Afar Regio  | Lower Thar   | 0 | 120 | Y | Pass        |
| 2511519 | F | South Wes   | A Level or I | 0 | 60  | N | Distinction |
| 2520290 | F | Afar Regio  | A Level or I | 0 | 60  | N | Pass        |
| 2520649 | F | South Wes   | Lower Thar   | 0 | 60  | N | Pass        |
| 2537934 | M | Addis Abat  | HE Qualific  | 0 | 120 | N | Fail        |
| 2542310 | F | Sidamo Re   | Lower Thar   | 2 | 60  | N | Fail        |
| 2545047 | F | Addis Abat  | A Level or I | 0 | 120 | N | Pass        |
| 2552708 | M | Oromia Re   | Lower Thar   | 1 | 60  | N | Pass        |
| 2559992 | F | Afar Regio  | Lower Thar   | 1 | 120 | N | Fail        |
| 2567715 | M | South Regi  | A Level or I | 0 | 120 | N | Fail        |
| 2570396 | F | South Regi  | A Level or I | 1 | 60  | N | Pass        |
| 2576637 | F | Somalia Re  | A Level or I | 0 | 120 | N | Distinction |
| 2578532 | F | South Regi  | Lower Thar   | 0 | 120 | N | Pass        |
| 2580626 | F | Oromia Re   | HE Qualific  | 1 | 60  | N | Distinction |
| 2594368 | F | South Wes   | A Level or I | 0 | 60  | Y | Pass        |
| 2599784 | F | South Wes   | HE Qualific  | 0 | 60  | N | Pass        |
| 2603061 | F | Somalia Re  | Lower Thar   | 0 | 120 | N | Withdrawn   |
| 2603534 | F | Oromia Re   | A Level or I | 0 | 60  | Y | Withdrawn   |
| 2609768 | F | Sidamo Re   | HE Qualific  | 0 | 60  | N | Withdrawn   |
| 2610170 | F | Afar Regio  | Lower Thar   | 0 | 60  | N | Withdrawn   |
| 2610745 | F | Tigrai Regi | A Level or I | 0 | 60  | N | Pass        |
| 2611512 | F | Tigrai Regi | Lower Thar   | 0 | 60  | N | Fail        |
| 2614271 | F | South Regi  | A Level or I | 1 | 120 | N | Withdrawn   |
| 2614777 | F | Afar Regio  | HE Qualific  | 0 | 60  | N | Pass        |
| 2622652 | F | Oromia Re   | Lower Thar   | 0 | 60  | N | Pass        |
| 2623656 | F | South Regi  | A Level or I | 3 | 60  | N | Pass        |
| 2627398 | F | South Regi  | Lower Thar   | 0 | 60  | N | Withdrawn   |
| 2627493 | F | South Regi  | A Level or I | 0 | 120 | N | Withdrawn   |
| 2629503 | F | South Regi  | Lower Thar   | 1 | 240 | Y | Withdrawn   |
| 2631298 | F | Amhara Re   | Lower Thar   | 0 | 60  | N | Withdrawn   |
| 2634319 | F | Addis Abat  | HE Qualific  | 0 | 60  | N | Distinction |
| 2638403 | F | Afar Regio  | A Level or I | 0 | 60  | N | Pass        |
| 2660510 | F | Sidamo Re   | Lower Thar   | 0 | 60  | Y | Pass        |
| 2670300 | F | Somalia Re  | Lower Thar   | 0 | 60  | N | Pass        |
| 2677541 | F | Tigrai Regi | Lower Thar   | 1 | 120 | N | Distinction |
| 2681505 | F | South Regi  | HE Qualific  | 0 | 60  | N | Pass        |
| 2681940 | F | Afar Regio  | A Level or I | 5 | 60  | N | Pass        |
| 2682693 | M | North Regi  | Lower Thar   | 0 | 120 | N | Fail        |
| 2684107 | F | Sidamo Re   | A Level or I | 0 | 120 | N | Withdrawn   |



|         |   |                         |   |     |   |             |
|---------|---|-------------------------|---|-----|---|-------------|
| 2685247 | F | South Wes A Level or I  | 0 | 60  | N | Distinction |
| 2687739 | F | South Regi A Level or I | 0 | 120 | N | Withdrawn   |
| 2687858 | F | South Regi Lower Tha    | 0 | 120 | N | Pass        |
| 2688495 | F | Addis Abak Lower Tha    | 0 | 60  | N | Distinction |
| 2688945 | F | South Regi HE Qualific  | 0 | 60  | N | Pass        |
| 2692969 | F | Afar Regio HE Qualific  | 0 | 75  | N | Pass        |
| 2694919 | F | Addis Abak Lower Tha    | 0 | 120 | Y | Pass        |
| 2698577 | F | Tigrai Regi Lower Tha   | 0 | 60  | N | Fail        |
| 2698588 | F | Sidamo Re HE Qualific   | 0 | 120 | N | Distinction |
| 2698591 | F | Tigrai Regi Lower Tha   | 0 | 180 | N | Withdrawn   |
| 28418   | F | South Regi A Level or I | 0 | 30  | N | Fail        |
| 29764   | M | Addis Abak A Level or I | 0 | 90  | N | Distinction |
| 29820   | M | Addis Abak HE Qualific  | 0 | 60  | N | Pass        |
| 40333   | M | North Regi HE Qualific  | 0 | 30  | N | Withdrawn   |
| 40604   | M | South Wes A Level or I  | 0 | 30  | N | Pass        |
| 42638   | M | Afar Regio HE Qualific  | 0 | 60  | N | Pass        |
| 45664   | M | Sidamo Re HE Qualific   | 0 | 60  | N | Withdrawn   |
| 46605   | M | Addis Abak HE Qualific  | 0 | 60  | N | Distinction |
| 49119   | M | South Wes HE Qualific   | 0 | 90  | N | Distinction |
| 50263   | M | South Regi HE Qualific  | 0 | 60  | N | Withdrawn   |
| 51576   | F | Sidamo Re Lower Tha     | 0 | 90  | N | Withdrawn   |
| 54391   | M | South Wes Lower Tha     | 0 | 60  | N | Withdrawn   |
| 57340   | F | Addis Abak A Level or I | 0 | 120 | N | Pass        |
| 59541   | M | Addis Abak A Level or I | 0 | 30  | Y | Withdrawn   |
| 62278   | M | South Regi A Level or I | 0 | 40  | N | Fail        |
| 64296   | M | Afar Regio HE Qualific  | 0 | 60  | N | Fail        |
| 66254   | F | South Wes A Level or I  | 0 | 30  | N | Fail        |
| 69489   | M | South Wes Lower Tha     | 0 | 150 | N | Withdrawn   |
| 69494   | F | Sidamo Re No Formal     | 0 | 80  | N | Withdrawn   |
| 69703   | M | Sidamo Re Lower Tha     | 0 | 120 | N | Pass        |
| 70381   | M | Afar Regio HE Qualific  | 0 | 30  | N | Pass        |
| 70771   | M | Afar Regio HE Qualific  | 0 | 60  | N | Withdrawn   |
| 74290   | M | Afar Regio Lower Tha    | 0 | 60  | N | Withdrawn   |
| 75454   | M | South Wes A Level or I  | 0 | 120 | N | Pass        |
| 75469   | M | Somalia Re A Level or I | 0 | 210 | N | Withdrawn   |
| 75728   | F | South Wes HE Qualific   | 0 | 30  | N | Fail        |
| 79461   | M | Afar Regio A Level or I | 0 | 90  | N | Withdrawn   |
| 80329   | M | South Regi Lower Tha    | 0 | 120 | N | Withdrawn   |
| 82575   | M | South Regi HE Qualific  | 0 | 30  | N | Distinction |
| 83219   | F | South Regi A Level or I | 0 | 60  | N | Pass        |
| 83453   | M | South Regi HE Qualific  | 0 | 30  | N | Withdrawn   |
| 84299   | M | Sidamo Re A Level or I  | 0 | 120 | N | Withdrawn   |
| 86047   | F | Tigrai Regi HE Qualific | 0 | 30  | N | Withdrawn   |
| 88758   | M | North Regi Post Gradu   | 0 | 330 | N | Withdrawn   |
| 94484   | M | South Regi Lower Tha    | 0 | 120 | Y | Pass        |
| 95906   | F | Somalia Re A Level or I | 0 | 120 | N | Pass        |
| 96538   | M | North Regi Lower Tha    | 0 | 60  | N | Fail        |

|        |   |                          |   |     |   |             |
|--------|---|--------------------------|---|-----|---|-------------|
| 97486  | M | Amhara Re HE Qualific    | 0 | 60  | N | Withdrawn   |
| 100621 | M | South Regi A Level or I  | 0 | 60  | N | Withdrawn   |
| 105523 | M | Afar Regio HE Qualific   | 0 | 90  | N | Pass        |
| 107028 | M | Somalia Re Lower Than    | 0 | 90  | N | Withdrawn   |
| 107339 | F | Afar Regio HE Qualific   | 0 | 60  | N | Pass        |
| 108834 | M | South Regi A Level or I  | 0 | 90  | N | Withdrawn   |
| 108947 | M | Afar Regio Lower Than    | 0 | 120 | N | Withdrawn   |
| 116174 | M | Sidamo Re A Level or I   | 0 | 90  | N | Withdrawn   |
| 116518 | M | Sidamo Re HE Qualific    | 0 | 80  | N | Pass        |
| 117232 | M | South Wes A Level or I   | 0 | 90  | N | Pass        |
| 118098 | M | Somalia Re HE Qualific   | 0 | 30  | N | Fail        |
| 119353 | M | North Regi A Level or I  | 0 | 90  | N | Withdrawn   |
| 119729 | M | Addis Abak HE Qualific   | 0 | 30  | N | Withdrawn   |
| 122392 | M | Sidamo Re A Level or I   | 0 | 60  | N | Pass        |
| 123598 | M | Afar Regio A Level or I  | 0 | 90  | Y | Withdrawn   |
| 124124 | F | Afar Regio Lower Than    | 0 | 60  | N | Withdrawn   |
| 124193 | M | Addis Abak HE Qualific   | 0 | 30  | N | Distinction |
| 126337 | M | South Regi Lower Than    | 0 | 75  | N | Withdrawn   |
| 126394 | M | Tigrai Regi A Level or I | 0 | 120 | N | Pass        |
| 126395 | M | Sidamo Re A Level or I   | 0 | 30  | Y | Pass        |
| 128510 | F | Afar Regio Lower Than    | 0 | 180 | N | Withdrawn   |
| 129198 | F | Amhara Re HE Qualific    | 0 | 150 | Y | Withdrawn   |
| 129638 | F | Sidamo Re Lower Than     | 0 | 30  | N | Withdrawn   |
| 129878 | M | Somalia Re Lower Than    | 0 | 45  | N | Fail        |
| 131145 | M | South Wes A Level or I   | 0 | 90  | N | Distinction |
| 131695 | F | Somalia Re Lower Than    | 0 | 120 | N | Withdrawn   |
| 131933 | M | Afar Regio Post Gradu    | 0 | 30  | N | Withdrawn   |
| 132191 | M | South Regi A Level or I  | 0 | 60  | Y | Withdrawn   |
| 133104 | M | Sidamo Re Lower Than     | 0 | 120 | Y | Distinction |
| 134025 | M | Sidamo Re A Level or I   | 0 | 60  | N | Withdrawn   |
| 135330 | M | Afar Regio HE Qualific   | 0 | 60  | N | Fail        |
| 135792 | M | South Wes Lower Than     | 0 | 60  | N | Fail        |
| 139190 | M | Somalia Re Lower Than    | 0 | 150 | N | Withdrawn   |
| 142935 | F | Sidamo Re Lower Than     | 0 | 60  | N | Pass        |
| 145282 | M | Sidamo Re Lower Than     | 0 | 60  | N | Distinction |
| 146125 | M | Sidamo Re Lower Than     | 0 | 60  | N | Withdrawn   |
| 147675 | M | South Regi A Level or I  | 0 | 30  | N | Withdrawn   |
| 151549 | M | South Regi Lower Than    | 0 | 30  | N | Fail        |
| 152428 | F | South Regi A Level or I  | 0 | 120 | N | Pass        |
| 152962 | F | Addis Abak A Level or I  | 0 | 30  | N | Pass        |
| 153687 | F | South Regi A Level or I  | 0 | 400 | N | Withdrawn   |
| 153788 | M | Amhara Re No Formal      | 0 | 90  | N | Withdrawn   |
| 155067 | M | Amhara Re Lower Than     | 0 | 45  | N | Fail        |
| 155963 | M | North Regi A Level or I  | 0 | 60  | N | Distinction |
| 157310 | F | Sidamo Re Lower Than     | 0 | 210 | N | Withdrawn   |
| 160300 | M | Addis Abak A Level or I  | 0 | 60  | N | Pass        |
| 162650 | M | South Regi HE Qualific   | 0 | 30  | N | Fail        |

|        |   |                |              |   |     |   |             |
|--------|---|----------------|--------------|---|-----|---|-------------|
| 165647 | F | Afar Region    | A Level or I | 0 | 120 | N | Withdrawn   |
| 165733 | M | Afar Region    | A Level or I | 0 | 90  | Y | Withdrawn   |
| 166160 | F | South Region   | HE Qualific  | 0 | 30  | N | Distinction |
| 167791 | M | Amhara Region  | A Level or I | 0 | 60  | N | Pass        |
| 168178 | M | Sidamo Region  | A Level or I | 0 | 30  | Y | Pass        |
| 169380 | M | Somalia Region | A Level or I | 0 | 60  | N | Pass        |
| 170025 | F | Addis Ababa    | HE Qualific  | 0 | 60  | N | Withdrawn   |
| 170864 | M | Afar Region    | HE Qualific  | 0 | 60  | Y | Distinction |
| 171896 | F | Oromia Region  | A Level or I | 0 | 60  | N | Withdrawn   |
| 172301 | M | Somalia Region | Lower Than   | 0 | 60  | N | Withdrawn   |
| 172965 | M | Afar Region    | Post Gradu   | 0 | 150 | N | Distinction |
| 174807 | F | South West     | HE Qualific  | 0 | 90  | N | Withdrawn   |
| 175490 | F | South Region   | HE Qualific  | 0 | 60  | N | Distinction |
| 177967 | M | Afar Region    | A Level or I | 0 | 30  | N | Pass        |
| 178072 | M | Oromia Region  | A Level or I | 0 | 60  | N | Withdrawn   |
| 178496 | M | North Region   | HE Qualific  | 0 | 30  | N | Distinction |
| 178654 | F | Afar Region    | HE Qualific  | 0 | 30  | N | Withdrawn   |
| 179904 | M | Amhara Region  | A Level or I | 0 | 90  | N | Fail        |
| 180976 | M | North Region   | Lower Than   | 0 | 30  | N | Pass        |
| 183331 | M | South West     | Lower Than   | 0 | 90  | N | Withdrawn   |
| 187435 | F | South Region   | Lower Than   | 0 | 90  | N | Distinction |
| 189428 | F | South Region   | Lower Than   | 0 | 30  | Y | Pass        |
| 189624 | M | South Region   | A Level or I | 0 | 150 | N | Pass        |
| 191000 | M | Afar Region    | Post Gradu   | 0 | 60  | N | Withdrawn   |
| 191797 | F | Amhara Region  | A Level or I | 0 | 30  | N | Pass        |
| 193163 | M | Afar Region    | HE Qualific  | 0 | 90  | N | Fail        |
| 194377 | F | Tigray Region  | A Level or I | 0 | 60  | N | Withdrawn   |
| 197486 | M | Tigray Region  | HE Qualific  | 0 | 60  | N | Withdrawn   |
| 198902 | M | Sidamo Region  | Lower Than   | 0 | 60  | N | Fail        |
| 200372 | M | Afar Region    | HE Qualific  | 0 | 120 | N | Withdrawn   |
| 201327 | M | Amhara Region  | HE Qualific  | 0 | 30  | N | Fail        |
| 203707 | M | Addis Ababa    | A Level or I | 0 | 150 | N | Withdrawn   |
| 204725 | M | South Region   | A Level or I | 0 | 30  | N | Pass        |
| 205398 | M | Sidamo Region  | A Level or I | 0 | 60  | N | Fail        |
| 205425 | M | Addis Ababa    | A Level or I | 0 | 60  | N | Distinction |
| 206245 | M | Amhara Region  | HE Qualific  | 0 | 40  | N | Pass        |
| 206599 | M | South West     | A Level or I | 0 | 90  | N | Fail        |
| 227192 | M | Sidamo Region  | Lower Than   | 0 | 60  | N | Pass        |
| 227752 | F | Sidamo Region  | Lower Than   | 0 | 30  | N | Fail        |
| 227833 | F | South Region   | A Level or I | 0 | 60  | N | Withdrawn   |
| 228153 | M | South Region   | Lower Than   | 0 | 90  | N | Fail        |
| 228743 | M | Oromia Region  | Lower Than   | 0 | 90  | N | Fail        |
| 229499 | M | Somalia Region | A Level or I | 0 | 90  | N | Fail        |
| 230340 | M | Sidamo Region  | A Level or I | 0 | 60  | N | Withdrawn   |
| 230761 | M | North Region   | A Level or I | 0 | 180 | N | Fail        |
| 231339 | F | Afar Region    | Post Gradu   | 0 | 60  | N | Distinction |
| 232833 | M | Somalia Region | A Level or I | 0 | 60  | N | Withdrawn   |

|        |   |                         |   |     |   |             |
|--------|---|-------------------------|---|-----|---|-------------|
| 233444 | M | Sidamo Re Lower Than    | 0 | 60  | N | Withdrawn   |
| 234068 | M | Addis Abak Lower Than   | 0 | 90  | N | Fail        |
| 234311 | M | Afar Region A Level or  | 0 | 60  | N | Fail        |
| 234740 | M | South Regi Lower Than   | 0 | 30  | N | Withdrawn   |
| 235175 | M | Somalia Re Lower Than   | 0 | 90  | Y | Withdrawn   |
| 236205 | M | South Wes HE Qualific   | 0 | 30  | N | Pass        |
| 236620 | M | South Regi A Level or   | 0 | 60  | N | Pass        |
| 237934 | M | Afar Region HE Qualific | 0 | 60  | N | Fail        |
| 239707 | M | Tigrai Regi A Level or  | 0 | 60  | N | Withdrawn   |
| 241955 | M | South Wes HE Qualific   | 0 | 60  | N | Fail        |
| 242778 | M | Afar Region HE Qualific | 0 | 90  | N | Withdrawn   |
| 242858 | M | Somalia Re A Level or   | 0 | 60  | N | Pass        |
| 243351 | M | South Regi A Level or   | 0 | 90  | N | Withdrawn   |
| 244902 | M | Addis Abak A Level or   | 0 | 30  | N | Withdrawn   |
| 244977 | M | Addis Abak A Level or   | 0 | 60  | N | Pass        |
| 245217 | M | Somalia Re A Level or   | 0 | 235 | N | Withdrawn   |
| 245494 | M | Afar Region HE Qualific | 0 | 90  | N | Withdrawn   |
| 246248 | F | South Wes HE Qualific   | 0 | 60  | N | Fail        |
| 247819 | M | Oromia Re Lower Than    | 0 | 60  | N | Pass        |
| 248252 | F | Sidamo Re HE Qualific   | 0 | 90  | N | Withdrawn   |
| 250092 | M | Amhara Re A Level or    | 0 | 60  | N | Fail        |
| 251385 | F | Addis Abak A Level or   | 0 | 60  | N | Distinction |
| 253859 | M | Afar Region A Level or  | 0 | 30  | N | Distinction |
| 255140 | M | South Regi A Level or   | 0 | 120 | N | Withdrawn   |
| 255310 | M | Somalia Re HE Qualific  | 0 | 90  | N | Pass        |
| 256532 | M | South Regi A Level or   | 0 | 70  | N | Withdrawn   |
| 260062 | M | Afar Region HE Qualific | 0 | 150 | N | Withdrawn   |
| 260949 | F | Addis Abak A Level or   | 0 | 150 | N | Pass        |
| 261042 | M | Sidamo Re Lower Than    | 0 | 120 | N | Fail        |
| 261265 | M | Addis Abak Lower Than   | 0 | 120 | N | Fail        |
| 261615 | M | Sidamo Re HE Qualific   | 0 | 60  | N | Pass        |
| 262391 | F | Sidamo Re A Level or    | 0 | 240 | Y | Withdrawn   |
| 264159 | M | South Wes A Level or    | 0 | 30  | N | Pass        |
| 264285 | M | Sidamo Re A Level or    | 0 | 60  | N | Withdrawn   |
| 266040 | M | Addis Abak A Level or   | 0 | 60  | N | Withdrawn   |
| 266558 | M | Sidamo Re A Level or    | 0 | 90  | Y | Withdrawn   |
| 266915 | M | Amhara Re Lower Than    | 0 | 60  | N | Withdrawn   |
| 267118 | F | South Wes Lower Than    | 0 | 90  | Y | Withdrawn   |
| 268018 | M | Sidamo Re Lower Than    | 0 | 60  | N | Withdrawn   |
| 268127 | F | Addis Abak A Level or   | 0 | 60  | N | Withdrawn   |
| 269676 | M | Amhara Re Lower Than    | 0 | 90  | N | Pass        |
| 272103 | M | Afar Region A Level or  | 0 | 90  | Y | Withdrawn   |
| 277577 | F | Sidamo Re A Level or    | 0 | 120 | N | Withdrawn   |
| 277809 | M | Oromia Re A Level or    | 0 | 60  | N | Withdrawn   |
| 278861 | M | Tigrai Regi A Level or  | 0 | 60  | N | Withdrawn   |
| 279868 | F | Sidamo Re HE Qualific   | 0 | 120 | N | Pass        |
| 279883 | M | Somalia Re A Level or   | 0 | 150 | N | Withdrawn   |

|        |   |                         |   |     |   |             |
|--------|---|-------------------------|---|-----|---|-------------|
| 281261 | M | South Wes HE Qualific   | 0 | 30  | N | Withdrawn   |
| 281801 | M | Tigrai Regi Post Gradu  | 0 | 30  | N | Distinction |
| 282193 | M | Amhara Re No Formal     | 0 | 30  | N | Pass        |
| 283798 | M | Sidamo Re Lower Tha     | 0 | 60  | N | Pass        |
| 284812 | M | South Wes HE Qualific   | 0 | 30  | N | Distinction |
| 285170 | M | Sidamo Re A Level or I  | 0 | 60  | N | Pass        |
| 285475 | M | Sidamo Re HE Qualific   | 0 | 160 | N | Pass        |
| 289009 | M | Sidamo Re HE Qualific   | 0 | 150 | N | Pass        |
| 289397 | M | Oromia Re A Level or I  | 0 | 60  | Y | Withdrawn   |
| 290382 | M | Sidamo Re Lower Tha     | 0 | 60  | N | Withdrawn   |
| 291805 | F | Tigrai Regi HE Qualific | 0 | 30  | N | Pass        |
| 294578 | M | Sidamo Re HE Qualific   | 0 | 60  | N | Withdrawn   |
| 295893 | M | Somalia Re A Level or I | 0 | 60  | Y | Withdrawn   |
| 296411 | M | Somalia Re A Level or I | 0 | 30  | N | Pass        |
| 298040 | F | South Regi HE Qualific  | 0 | 30  | N | Pass        |
| 300059 | M | South Regi A Level or I | 0 | 180 | Y | Pass        |
| 300594 | M | Somalia Re A Level or I | 0 | 60  | Y | Withdrawn   |
| 300611 | M | Amhara Re HE Qualific   | 0 | 120 | N | Withdrawn   |
| 301232 | M | South Wes HE Qualific   | 0 | 30  | N | Pass        |
| 305783 | M | Addis Abat Lower Tha    | 0 | 60  | N | Withdrawn   |
| 305876 | M | Afar Regio HE Qualific  | 0 | 120 | Y | Fail        |
| 305974 | M | South Regi A Level or I | 0 | 120 | N | Withdrawn   |
| 306150 | M | Afar Regio A Level or I | 0 | 90  | N | Withdrawn   |
| 308391 | M | South Regi A Level or I | 0 | 60  | N | Withdrawn   |
| 308918 | F | Sidamo Re HE Qualific   | 0 | 135 | N | Fail        |
| 309118 | M | South Regi HE Qualific  | 0 | 120 | N | Pass        |
| 309515 | F | Afar Regio Post Gradu   | 0 | 60  | N | Withdrawn   |
| 310088 | M | South Wes Lower Tha     | 0 | 60  | N | Withdrawn   |
| 311616 | M | South Wes HE Qualific   | 0 | 30  | N | Pass        |
| 312886 | F | Oromia Re Lower Tha     | 0 | 60  | N | Fail        |
| 314555 | F | South Regi A Level or I | 0 | 120 | Y | Withdrawn   |
| 315322 | M | Somalia Re A Level or I | 0 | 60  | N | Withdrawn   |
| 315728 | M | North Regi HE Qualific  | 0 | 30  | N | Pass        |
| 316061 | M | Amhara Re Lower Tha     | 0 | 180 | Y | Fail        |
| 316227 | M | South Regi HE Qualific  | 0 | 30  | N | Distinction |
| 318574 | M | Amhara Re A Level or I  | 0 | 90  | N | Withdrawn   |
| 319042 | M | Sidamo Re A Level or I  | 0 | 180 | N | Fail        |
| 320153 | F | Sidamo Re Lower Tha     | 0 | 30  | N | Withdrawn   |
| 321112 | M | North Regi A Level or I | 0 | 60  | N | Withdrawn   |
| 324257 | M | Sidamo Re A Level or I  | 0 | 60  | N | Fail        |
| 325497 | F | South Wes A Level or I  | 0 | 150 | N | Withdrawn   |
| 328261 | M | South Regi A Level or I | 0 | 30  | N | Fail        |
| 329673 | M | North Regi Lower Tha    | 0 | 60  | N | Pass        |
| 330862 | M | North Regi A Level or I | 0 | 150 | N | Fail        |
| 330994 | M | Somalia Re Lower Tha    | 0 | 30  | N | Withdrawn   |
| 335553 | M | South Regi HE Qualific  | 0 | 60  | N | Withdrawn   |
| 335648 | F | Oromia Re Lower Tha     | 0 | 150 | N | Fail        |

|        |   |                            |   |     |   |             |
|--------|---|----------------------------|---|-----|---|-------------|
| 336398 | M | Amhara Re A Level or I     | 0 | 60  | N | Distinction |
| 336695 | F | Somalia Re A Level or I    | 0 | 135 | N | Withdrawn   |
| 338604 | M | Afar Region A Level or I   | 0 | 210 | N | Pass        |
| 338731 | M | Sidamo Re Lower Than       | 0 | 30  | N | Withdrawn   |
| 338854 | M | Tigray Region HE Qualific  | 0 | 150 | N | Withdrawn   |
| 339353 | M | Somalia Re A Level or I    | 0 | 120 | N | Withdrawn   |
| 342089 | M | North Region HE Qualific   | 0 | 90  | N | Fail        |
| 342957 | M | Afar Region Lower Than     | 0 | 60  | N | Fail        |
| 342974 | M | Addis Ababa Lower Than     | 0 | 60  | N | Pass        |
| 344367 | M | North Region Lower Than    | 0 | 90  | N | Fail        |
| 344396 | F | Tigray Region A Level or I | 0 | 30  | N | Fail        |
| 345256 | M | Afar Region HE Qualific    | 0 | 30  | N | Pass        |
| 347257 | M | Amhara Re Lower Than       | 0 | 120 | N | Withdrawn   |
| 347518 | M | Afar Region A Level or I   | 0 | 120 | N | Withdrawn   |
| 347764 | M | Oromia Re Lower Than       | 0 | 90  | N | Fail        |
| 348050 | M | Sidamo Re A Level or I     | 0 | 90  | N | Fail        |
| 348159 | F | Sidamo Re HE Qualific      | 0 | 30  | N | Pass        |
| 349069 | M | South West Lower Than      | 0 | 60  | N | Fail        |
| 351328 | F | North Region Lower Than    | 0 | 60  | N | Withdrawn   |
| 351577 | M | Afar Region A Level or I   | 0 | 90  | N | Pass        |
| 351775 | F | Afar Region HE Qualific    | 0 | 90  | N | Pass        |
| 353066 | M | Somalia Re A Level or I    | 0 | 90  | N | Withdrawn   |
| 353660 | M | South Region A Level or I  | 0 | 30  | N | Withdrawn   |
| 353804 | M | Amhara Re HE Qualific      | 0 | 60  | N | Withdrawn   |
| 353979 | M | Sidamo Re Lower Than       | 0 | 90  | N | Withdrawn   |
| 354607 | F | Tigray Region Lower Than   | 0 | 120 | N | Pass        |
| 355143 | M | Amhara Re A Level or I     | 0 | 30  | N | Fail        |
| 356274 | M | Afar Region A Level or I   | 0 | 90  | N | Fail        |
| 356523 | M | South Region Lower Than    | 0 | 60  | N | Withdrawn   |
| 357176 | M | South West HE Qualific     | 0 | 90  | N | Pass        |
| 357214 | F | South West Lower Than      | 0 | 60  | Y | Withdrawn   |
| 357485 | M | South West A Level or I    | 0 | 60  | N | Withdrawn   |
| 357851 | M | Addis Ababa Lower Than     | 0 | 90  | Y | Withdrawn   |
| 357942 | F | Addis Ababa Lower Than     | 0 | 70  | N | Withdrawn   |
| 358075 | F | South West A Level or I    | 0 | 60  | N | Withdrawn   |
| 359114 | F | Sidamo Re A Level or I     | 0 | 60  | Y | Pass        |
| 359460 | F | Oromia Re A Level or I     | 0 | 90  | Y | Withdrawn   |
| 360547 | M | South Region A Level or I  | 0 | 30  | N | Withdrawn   |
| 361410 | F | Sidamo Re A Level or I     | 0 | 145 | N | Pass        |
| 362223 | F | South Region A Level or I  | 0 | 60  | N | Pass        |
| 362661 | M | Amhara Re A Level or I     | 0 | 90  | N | Withdrawn   |
| 363374 | M | Tigray Region Lower Than   | 0 | 30  | N | Fail        |
| 363773 | F | Oromia Re A Level or I     | 0 | 90  | N | Pass        |
| 363906 | M | Amhara Re HE Qualific      | 0 | 30  | N | Fail        |
| 363939 | M | South Region Lower Than    | 0 | 60  | N | Fail        |
| 364920 | M | Afar Region HE Qualific    | 0 | 60  | N | Withdrawn   |
| 365993 | M | South West A Level or I    | 0 | 90  | N | Fail        |

|        |   |                          |   |     |   |             |
|--------|---|--------------------------|---|-----|---|-------------|
| 366310 | M | North Regi Lower Tha     | 0 | 30  | N | Pass        |
| 366424 | F | South Regi HE Qualific   | 0 | 135 | N | Withdrawn   |
| 366872 | F | Oromia Re Lower Tha      | 0 | 120 | N | Withdrawn   |
| 367807 | M | South Wes Lower Tha      | 0 | 60  | N | Withdrawn   |
| 368483 | M | Amhara Re HE Qualific    | 0 | 60  | N | Withdrawn   |
| 368876 | M | Somalia Re Lower Tha     | 0 | 60  | N | Fail        |
| 369908 | M | Afar Regio HE Qualific   | 0 | 60  | N | Withdrawn   |
| 370336 | M | Somalia Re Lower Tha     | 0 | 150 | N | Fail        |
| 371113 | M | Addis Abak Lower Tha     | 0 | 60  | Y | Withdrawn   |
| 371526 | M | Sidamo Re A Level or I   | 0 | 150 | N | Pass        |
| 371901 | F | Sidamo Re HE Qualific    | 0 | 30  | N | Pass        |
| 372812 | M | Oromia Re A Level or I   | 0 | 60  | N | Withdrawn   |
| 374028 | M | Sidamo Re Lower Tha      | 0 | 30  | N | Distinction |
| 374055 | F | Sidamo Re A Level or I   | 0 | 90  | N | Withdrawn   |
| 374756 | M | South Wes A Level or I   | 0 | 60  | N | Distinction |
| 375688 | M | Amhara Re A Level or I   | 0 | 90  | N | Withdrawn   |
| 376701 | M | South Wes A Level or I   | 0 | 90  | N | Withdrawn   |
| 378920 | M | South Regi Lower Tha     | 0 | 60  | N | Pass        |
| 379406 | F | Sidamo Re A Level or I   | 0 | 90  | N | Withdrawn   |
| 381240 | M | Addis Abak A Level or I  | 0 | 30  | N | Fail        |
| 381927 | F | Amhara Re A Level or I   | 0 | 30  | N | Distinction |
| 383015 | F | Afar Regio HE Qualific   | 0 | 150 | Y | Withdrawn   |
| 383140 | M | South Regi A Level or I  | 0 | 30  | N | Pass        |
| 383158 | M | Afar Regio HE Qualific   | 0 | 30  | N | Pass        |
| 383311 | M | North Regi A Level or I  | 0 | 60  | N | Fail        |
| 383347 | M | North Regi Post Gradu    | 0 | 60  | N | Distinction |
| 383372 | F | Afar Regio Lower Tha     | 0 | 90  | N | Pass        |
| 383971 | F | South Regi A Level or I  | 0 | 60  | N | Fail        |
| 385120 | M | South Wes Lower Tha      | 0 | 90  | N | Withdrawn   |
| 385387 | F | North Regi HE Qualific   | 0 | 90  | N | Distinction |
| 385980 | M | Sidamo Re A Level or I   | 0 | 90  | N | Withdrawn   |
| 386121 | M | Sidamo Re Lower Tha      | 0 | 90  | N | Withdrawn   |
| 386189 | M | Addis Abak Lower Tha     | 0 | 120 | N | Withdrawn   |
| 386671 | M | Amhara Re Lower Tha      | 0 | 150 | N | Withdrawn   |
| 387009 | F | Tigrai Regi A Level or I | 0 | 60  | N | Pass        |
| 388538 | M | Addis Abak HE Qualific   | 0 | 30  | N | Pass        |
| 388708 | M | Sidamo Re HE Qualific    | 0 | 30  | N | Withdrawn   |
| 388750 | F | Addis Abak A Level or I  | 0 | 210 | Y | Withdrawn   |
| 389680 | M | North Regi Lower Tha     | 0 | 150 | N | Withdrawn   |
| 390233 | M | South Regi Lower Tha     | 0 | 60  | Y | Withdrawn   |
| 391343 | M | South Regi Lower Tha     | 0 | 150 | N | Fail        |
| 391419 | M | Oromia Re A Level or I   | 0 | 30  | N | Fail        |
| 392289 | M | Oromia Re A Level or I   | 0 | 30  | N | Withdrawn   |
| 392526 | F | Addis Abak A Level or I  | 0 | 30  | N | Pass        |
| 394311 | M | Sidamo Re Lower Tha      | 0 | 30  | N | Pass        |
| 394341 | M | Oromia Re A Level or I   | 0 | 90  | N | Fail        |
| 394791 | F | Amhara Re Lower Tha      | 0 | 90  | Y | Withdrawn   |

|        |   |                          |   |     |   |             |
|--------|---|--------------------------|---|-----|---|-------------|
| 395164 | M | Sidamo Re A Level or I   | 0 | 150 | Y | Withdrawn   |
| 396825 | M | South Wes A Level or I   | 0 | 80  | N | Pass        |
| 397149 | M | South Regi Lower Tha     | 0 | 90  | N | Withdrawn   |
| 397506 | F | South Regi Lower Tha     | 0 | 120 | N | Pass        |
| 397797 | M | South Regi A Level or I  | 0 | 60  | N | Withdrawn   |
| 398487 | M | Oromia Re A Level or I   | 0 | 30  | N | Fail        |
| 398877 | M | Sidamo Re Lower Tha      | 0 | 90  | N | Withdrawn   |
| 399863 | M | South Regi A Level or I  | 0 | 270 | N | Withdrawn   |
| 400063 | M | Tigrai Regi Lower Tha    | 0 | 90  | N | Withdrawn   |
| 401296 | F | Addis Abat A Level or I  | 0 | 60  | N | Pass        |
| 401903 | M | Tigrai Regi A Level or I | 0 | 60  | N | Pass        |
| 403085 | M | Somalia Re Lower Tha     | 0 | 60  | N | Pass        |
| 404239 | M | Afar Regioi A Level or I | 0 | 60  | Y | Fail        |
| 405192 | F | Somalia Re A Level or I  | 0 | 90  | N | Withdrawn   |
| 406265 | M | Afar Regioi Lower Tha    | 0 | 30  | Y | Withdrawn   |
| 406337 | F | North Regi A Level or I  | 0 | 30  | N | Withdrawn   |
| 406846 | M | South Wes Lower Tha      | 0 | 30  | N | Fail        |
| 406908 | M | Sidamo Re Lower Tha      | 0 | 90  | N | Fail        |
| 406937 | F | South Regi Lower Tha     | 0 | 60  | N | Withdrawn   |
| 407453 | M | Addis Abat A Level or I  | 0 | 60  | N | Withdrawn   |
| 407818 | M | South Regi HE Qualific   | 0 | 30  | N | Fail        |
| 408371 | M | Somalia Re A Level or I  | 0 | 30  | N | Withdrawn   |
| 408413 | M | Tigrai Regi A Level or I | 0 | 60  | N | Fail        |
| 409540 | M | Amhara Re HE Qualific    | 0 | 30  | N | Withdrawn   |
| 410203 | F | South Regi HE Qualific   | 0 | 30  | N | Pass        |
| 410407 | M | South Regi HE Qualific   | 0 | 30  | N | Distinction |
| 410699 | M | Sidamo Re HE Qualific    | 0 | 30  | N | Pass        |
| 410886 | F | Afar Regioi A Level or I | 0 | 90  | N | Withdrawn   |
| 412258 | F | Oromia Re A Level or I   | 0 | 40  | N | Distinction |
| 412268 | M | South Regi Lower Tha     | 0 | 30  | N | Withdrawn   |
| 412284 | M | Somalia Re A Level or I  | 0 | 150 | Y | Fail        |
| 413083 | M | Sidamo Re HE Qualific    | 0 | 60  | N | Fail        |
| 416500 | M | Oromia Re A Level or I   | 0 | 90  | N | Withdrawn   |
| 416689 | F | Afar Regioi A Level or I | 0 | 120 | N | Pass        |
| 416860 | F | Somalia Re A Level or I  | 0 | 60  | N | Withdrawn   |
| 417820 | M | Sidamo Re A Level or I   | 0 | 60  | N | Pass        |
| 418224 | F | South Wes HE Qualific    | 0 | 60  | N | Fail        |
| 418623 | M | South Wes A Level or I   | 0 | 90  | Y | Pass        |
| 418971 | M | Somalia Re Lower Tha     | 0 | 60  | N | Withdrawn   |
| 419233 | F | Tigrai Regi HE Qualific  | 0 | 120 | N | Fail        |
| 419536 | M | South Regi A Level or I  | 0 | 60  | N | Withdrawn   |
| 420345 | M | Somalia Re Lower Tha     | 0 | 60  | N | Pass        |
| 420428 | M | South Regi HE Qualific   | 0 | 60  | N | Withdrawn   |
| 420528 | M | South Wes A Level or I   | 0 | 90  | N | Distinction |
| 420935 | M | South Wes HE Qualific    | 0 | 30  | N | Distinction |
| 421209 | F | Sidamo Re HE Qualific    | 0 | 60  | Y | Pass        |
| 421712 | M | Amhara Re A Level or I   | 0 | 90  | N | Withdrawn   |



|        |   |                          |   |     |   |             |
|--------|---|--------------------------|---|-----|---|-------------|
| 423879 | M | South Regi A Level or I  | 0 | 30  | N | Distinction |
| 424082 | M | Afar Regio HE Qualific   | 0 | 30  | N | Pass        |
| 424112 | F | South Wes A Level or I   | 0 | 60  | N | Pass        |
| 424950 | M | South Regi Lower Thar    | 0 | 45  | N | Pass        |
| 425287 | M | Sidamo Re Post Gradu     | 0 | 90  | N | Withdrawn   |
| 425714 | M | South Regi Lower Thar    | 0 | 60  | N | Withdrawn   |
| 426610 | F | Afar Regio A Level or I  | 0 | 120 | Y | Pass        |
| 426616 | F | Afar Regio HE Qualific   | 0 | 60  | Y | Fail        |
| 429065 | M | Afar Regio Lower Thar    | 0 | 30  | N | Fail        |
| 429185 | F | North Regi A Level or I  | 0 | 90  | N | Distinction |
| 429220 | F | Sidamo Re Lower Thar     | 0 | 60  | N | Withdrawn   |
| 430686 | M | South Regi A Level or I  | 0 | 90  | N | Pass        |
| 431014 | M | Addis Abak A Level or I  | 0 | 90  | N | Fail        |
| 431386 | M | Addis Abak A Level or I  | 0 | 60  | N | Pass        |
| 432278 | M | Addis Abak A Level or I  | 0 | 90  | N | Withdrawn   |
| 432718 | F | Addis Abak A Level or I  | 0 | 90  | N | Withdrawn   |
| 434562 | M | South Wes A Level or I   | 0 | 60  | N | Pass        |
| 434573 | M | South Regi A Level or I  | 0 | 60  | N | Fail        |
| 435271 | M | South Regi Lower Thar    | 0 | 90  | N | Withdrawn   |
| 436058 | M | Amhara Re A Level or I   | 0 | 30  | N | Pass        |
| 437432 | F | Sidamo Re Lower Thar     | 0 | 75  | N | Withdrawn   |
| 438313 | M | South Regi A Level or I  | 0 | 180 | N | Withdrawn   |
| 438796 | M | South Regi Post Gradu    | 0 | 120 | N | Pass        |
| 439669 | M | Sidamo Re A Level or I   | 0 | 60  | N | Withdrawn   |
| 440171 | F | Afar Regio HE Qualific   | 0 | 60  | N | Withdrawn   |
| 440297 | F | Tigrai Regi A Level or I | 0 | 170 | N | Withdrawn   |
| 440323 | F | Sidamo Re Lower Thar     | 0 | 30  | Y | Withdrawn   |
| 440591 | F | South Regi Lower Thar    | 0 | 100 | Y | Withdrawn   |
| 440905 | M | South Regi A Level or I  | 0 | 30  | N | Fail        |
| 441540 | M | Oromia Re Lower Thar     | 0 | 60  | N | Withdrawn   |
| 441606 | M | Somalia Re Lower Thar    | 0 | 180 | N | Withdrawn   |
| 442530 | M | Oromia Re Lower Thar     | 0 | 120 | Y | Withdrawn   |
| 442954 | M | North Regi A Level or I  | 0 | 60  | N | Withdrawn   |
| 445777 | M | Afar Regio HE Qualific   | 0 | 30  | N | Distinction |
| 445917 | M | Amhara Re HE Qualific    | 0 | 90  | N | Distinction |
| 445972 | M | Addis Abak Post Gradu    | 0 | 60  | N | Distinction |
| 446295 | M | Tigrai Regi Lower Thar   | 0 | 60  | N | Fail        |
| 446628 | M | Amhara Re Lower Thar     | 0 | 90  | N | Withdrawn   |
| 447306 | F | Sidamo Re HE Qualific    | 0 | 30  | N | Fail        |
| 464236 | M | Sidamo Re HE Qualific    | 0 | 70  | N | Withdrawn   |
| 464724 | M | South Regi Lower Thar    | 0 | 60  | N | Withdrawn   |
| 465194 | M | Amhara Re A Level or I   | 0 | 120 | N | Withdrawn   |
| 465406 | M | Amhara Re A Level or I   | 0 | 60  | N | Pass        |
| 465517 | M | South Regi Lower Thar    | 0 | 45  | N | Withdrawn   |
| 465719 | M | Afar Regio Lower Thar    | 0 | 210 | N | Fail        |
| 465764 | F | Somalia Re Lower Thar    | 0 | 130 | Y | Withdrawn   |
| 465843 | M | South Regi A Level or I  | 0 | 120 | N | Fail        |

|        |   |                          |   |     |   |             |
|--------|---|--------------------------|---|-----|---|-------------|
| 466289 | M | South Wes Lower Thar     | 0 | 30  | N | Pass        |
| 466714 | M | South Wes A Level or I   | 0 | 120 | Y | Withdrawn   |
| 467230 | M | Addis Abak A Level or I  | 0 | 90  | N | Pass        |
| 467753 | M | South Wes Post Gradu     | 0 | 30  | N | Withdrawn   |
| 467894 | F | South Regi A Level or I  | 0 | 60  | N | Fail        |
| 468753 | M | South Regi A Level or I  | 0 | 60  | N | Fail        |
| 469113 | M | Oromia Re A Level or I   | 0 | 60  | N | Withdrawn   |
| 469732 | M | Somalia Re Lower Thar    | 0 | 30  | N | Withdrawn   |
| 469761 | F | South Wes A Level or I   | 0 | 60  | N | Distinction |
| 470002 | M | Tigrai Regi HE Qualific  | 0 | 90  | N | Withdrawn   |
| 471018 | M | South Regi Lower Thar    | 0 | 60  | N | Withdrawn   |
| 471580 | M | Sidamo Re Lower Thar     | 0 | 90  | N | Withdrawn   |
| 471657 | M | Amhara Re Lower Thar     | 0 | 30  | N | Pass        |
| 471979 | M | South Wes Lower Thar     | 0 | 60  | N | Pass        |
| 472087 | M | Somalia Re HE Qualific   | 0 | 60  | N | Pass        |
| 472309 | F | Sidamo Re Post Gradu     | 0 | 60  | N | Withdrawn   |
| 472856 | M | Tigrai Regi HE Qualific  | 0 | 90  | N | Withdrawn   |
| 473965 | M | Somalia Re A Level or I  | 0 | 60  | N | Pass        |
| 474283 | M | South Regi A Level or I  | 0 | 120 | N | Fail        |
| 474377 | M | North Regi Lower Thar    | 0 | 120 | N | Withdrawn   |
| 474759 | F | South Regi Lower Thar    | 0 | 30  | Y | Fail        |
| 475149 | M | Somalia Re HE Qualific   | 0 | 30  | N | Withdrawn   |
| 475443 | M | South Regi Lower Thar    | 0 | 60  | N | Withdrawn   |
| 475556 | M | Somalia Re A Level or I  | 0 | 30  | N | Withdrawn   |
| 475945 | F | Sidamo Re HE Qualific    | 0 | 90  | N | Pass        |
| 476108 | F | Somalia Re Lower Thar    | 0 | 30  | N | Distinction |
| 476868 | F | Tigrai Regi Lower Thar   | 0 | 60  | Y | Withdrawn   |
| 476937 | M | Oromia Re Lower Thar     | 0 | 60  | N | Fail        |
| 477067 | F | South Regi A Level or I  | 0 | 30  | N | Pass        |
| 478025 | M | South Wes No Formal      | 0 | 60  | N | Withdrawn   |
| 478212 | M | Afar Regio HE Qualific   | 0 | 90  | N | Fail        |
| 478550 | M | Addis Abak A Level or I  | 0 | 60  | N | Fail        |
| 478977 | F | Amhara Re HE Qualific    | 0 | 60  | N | Withdrawn   |
| 479607 | M | Tigrai Regi A Level or I | 0 | 180 | N | Fail        |
| 479714 | M | Sidamo Re Lower Thar     | 0 | 90  | N | Withdrawn   |
| 479725 | M | Amhara Re Lower Thar     | 0 | 60  | N | Fail        |
| 479753 | F | Afar Regio A Level or I  | 0 | 60  | Y | Withdrawn   |
| 480604 | M | Amhara Re A Level or I   | 0 | 45  | N | Withdrawn   |
| 480928 | M | Sidamo Re Lower Thar     | 0 | 150 | Y | Withdrawn   |
| 480929 | M | South Wes HE Qualific    | 0 | 60  | N | Distinction |
| 480943 | M | South Regi Lower Thar    | 0 | 30  | N | Pass        |
| 481024 | F | Sidamo Re A Level or I   | 0 | 90  | N | Withdrawn   |
| 482280 | M | Addis Abak Lower Thar    | 0 | 60  | N | Pass        |
| 482745 | M | Oromia Re A Level or I   | 0 | 60  | N | Fail        |
| 483108 | F | Amhara Re A Level or I   | 0 | 120 | N | Withdrawn   |
| 483267 | M | South Regi HE Qualific   | 0 | 60  | N | Withdrawn   |
| 483275 | M | Oromia Re A Level or I   | 0 | 90  | N | Pass        |

|        |   |                           |   |     |   |             |
|--------|---|---------------------------|---|-----|---|-------------|
| 483666 | F | Tigray Region Lower Than  | 0 | 60  | N | Withdrawn   |
| 484174 | M | South West Lower Than     | 0 | 90  | N | Withdrawn   |
| 484305 | M | Addis Ababa Lower Than    | 0 | 150 | N | Withdrawn   |
| 484464 | F | Sidamo Region No Formal   | 0 | 60  | N | Pass        |
| 484787 | F | Amhara Region A Level or  | 0 | 90  | N | Withdrawn   |
| 485312 | M | Afar Region HE Qualific   | 0 | 90  | N | Distinction |
| 485374 | F | Afar Region A Level or    | 0 | 60  | N | Pass        |
| 485594 | F | South Region A Level or   | 0 | 180 | N | Withdrawn   |
| 485604 | F | Sidamo Region A Level or  | 0 | 30  | N | Distinction |
| 485944 | M | Amhara Region Lower Than  | 0 | 30  | N | Fail        |
| 486378 | M | Somalia Region Lower Than | 0 | 120 | N | Withdrawn   |
| 486737 | M | Amhara Region Lower Than  | 0 | 60  | Y | Withdrawn   |
| 487494 | M | South Region No Formal    | 0 | 60  | N | Withdrawn   |
| 487570 | F | Addis Ababa A Level or    | 0 | 60  | N | Withdrawn   |
| 487629 | M | Amhara Region A Level or  | 0 | 30  | N | Fail        |
| 488431 | M | North Region Lower Than   | 0 | 90  | Y | Pass        |
| 489309 | M | North Region A Level or   | 0 | 120 | N | Withdrawn   |
| 489929 | M | Oromia Region Lower Than  | 0 | 60  | N | Pass        |
| 490024 | M | South Region A Level or   | 0 | 90  | N | Pass        |
| 490081 | M | Addis Ababa Lower Than    | 0 | 75  | N | Pass        |
| 490282 | M | Oromia Region A Level or  | 0 | 60  | Y | Pass        |
| 490297 | M | Afar Region Lower Than    | 0 | 150 | Y | Withdrawn   |
| 490587 | M | Tigray Region Lower Than  | 0 | 120 | Y | Fail        |
| 490662 | M | South West A Level or     | 0 | 60  | N | Fail        |
| 490665 | M | Afar Region HE Qualific   | 0 | 120 | Y | Withdrawn   |
| 490768 | M | Sidamo Region Lower Than  | 0 | 60  | N | Withdrawn   |
| 490769 | F | Oromia Region A Level or  | 0 | 60  | N | Withdrawn   |
| 491170 | M | Sidamo Region A Level or  | 0 | 30  | N | Withdrawn   |
| 491232 | M | Oromia Region Lower Than  | 0 | 60  | Y | Fail        |
| 491742 | M | Amhara Region Lower Than  | 0 | 60  | N | Fail        |
| 491843 | F | Oromia Region Lower Than  | 0 | 30  | Y | Withdrawn   |
| 492357 | M | Somalia Region A Level or | 0 | 30  | N | Withdrawn   |
| 492900 | M | South West A Level or     | 0 | 60  | Y | Pass        |
| 493793 | M | South Region A Level or   | 0 | 180 | Y | Withdrawn   |
| 493822 | F | Amhara Region HE Qualific | 0 | 30  | N | Withdrawn   |
| 493988 | M | Addis Ababa A Level or    | 0 | 60  | N | Withdrawn   |
| 494389 | F | Sidamo Region A Level or  | 0 | 120 | Y | Fail        |
| 494919 | F | Afar Region A Level or    | 0 | 60  | Y | Pass        |
| 495320 | M | South Region Lower Than   | 0 | 60  | N | Pass        |
| 496108 | M | Addis Ababa Lower Than    | 0 | 60  | N | Withdrawn   |
| 497047 | F | Oromia Region Lower Than  | 0 | 60  | N | Withdrawn   |
| 497080 | M | Oromia Region Lower Than  | 0 | 30  | N | Withdrawn   |
| 498043 | M | Sidamo Region A Level or  | 0 | 60  | N | Fail        |
| 498138 | M | South West Lower Than     | 0 | 60  | N | Fail        |
| 498225 | M | South Region HE Qualific  | 0 | 90  | N | Withdrawn   |
| 498741 | M | Sidamo Region HE Qualific | 0 | 30  | N | Fail        |
| 500001 | M | Addis Ababa HE Qualific   | 0 | 60  | N | Withdrawn   |

|        |   |                          |   |     |   |             |
|--------|---|--------------------------|---|-----|---|-------------|
| 500006 | M | Sidamo Re A Level or I   | 0 | 60  | Y | Fail        |
| 500189 | M | Afar Region A Level or I | 0 | 60  | N | Withdrawn   |
| 500597 | M | South Regi A Level or I  | 0 | 30  | N | Fail        |
| 501339 | M | South Wes Lower Thar     | 0 | 30  | Y | Withdrawn   |
| 501443 | M | South Regi HE Qualific   | 0 | 30  | N | Fail        |
| 501652 | F | Tigrai Regi A Level or I | 0 | 120 | N | Fail        |
| 502465 | M | Amhara Re A Level or I   | 0 | 30  | N | Pass        |
| 502466 | M | Sidamo Re Lower Thar     | 0 | 150 | N | Withdrawn   |
| 502554 | M | South Regi HE Qualific   | 0 | 60  | N | Distinction |
| 502833 | M | Afar Region Lower Thar   | 0 | 90  | N | Fail        |
| 502868 | M | Sidamo Re A Level or I   | 0 | 60  | N | Pass        |
| 502929 | M | Sidamo Re Lower Thar     | 0 | 60  | N | Withdrawn   |
| 503469 | M | Sidamo Re A Level or I   | 0 | 90  | N | Fail        |
| 503872 | M | Amhara Re A Level or I   | 0 | 60  | N | Withdrawn   |
| 504057 | F | North Regi A Level or I  | 0 | 60  | Y | Withdrawn   |
| 505235 | M | Somalia Re HE Qualific   | 0 | 30  | N | Withdrawn   |
| 505520 | M | Addis Abak A Level or I  | 0 | 90  | N | Withdrawn   |
| 505767 | M | Afar Region HE Qualific  | 0 | 60  | N | Pass        |
| 505815 | M | Sidamo Re A Level or I   | 0 | 90  | Y | Withdrawn   |
| 505967 | F | Somalia Re Lower Thar    | 0 | 90  | N | Withdrawn   |
| 506206 | F | Amhara Re Lower Thar     | 0 | 30  | Y | Distinction |
| 506380 | M | South Regi HE Qualific   | 0 | 60  | N | Withdrawn   |
| 507034 | M | South Regi Post Gradu    | 0 | 60  | N | Pass        |
| 507388 | M | Amhara Re HE Qualific    | 0 | 30  | N | Withdrawn   |
| 507523 | M | Afar Region HE Qualific  | 0 | 60  | N | Pass        |
| 507671 | F | Amhara Re A Level or I   | 0 | 60  | N | Withdrawn   |
| 507801 | M | Sidamo Re A Level or I   | 0 | 30  | N | Withdrawn   |
| 508025 | F | South Regi A Level or I  | 0 | 120 | N | Withdrawn   |
| 508848 | M | South Regi A Level or I  | 0 | 120 | N | Withdrawn   |
| 509029 | F | North Regi A Level or I  | 0 | 60  | N | Pass        |
| 509102 | M | Oromia Re A Level or I   | 0 | 150 | N | Pass        |
| 509122 | M | South Regi A Level or I  | 0 | 30  | N | Withdrawn   |
| 509183 | F | Somalia Re Lower Thar    | 0 | 120 | N | Distinction |
| 509649 | M | Sidamo Re A Level or I   | 0 | 60  | N | Fail        |
| 509839 | M | North Regi Post Gradu    | 0 | 30  | N | Pass        |
| 510070 | F | Afar Region HE Qualific  | 0 | 90  | N | Withdrawn   |
| 510694 | M | Amhara Re Lower Thar     | 0 | 60  | N | Withdrawn   |
| 510914 | M | Tigrai Regi HE Qualific  | 0 | 60  | N | Withdrawn   |
| 511473 | F | Afar Region A Level or I | 0 | 60  | N | Pass        |
| 511657 | M | South Regi A Level or I  | 0 | 60  | N | Fail        |
| 512353 | M | Addis Abak A Level or I  | 0 | 150 | N | Fail        |
| 512475 | M | Afar Region Post Gradu   | 0 | 30  | N | Distinction |
| 512582 | M | North Regi Lower Thar    | 0 | 60  | N | Withdrawn   |
| 513638 | F | Sidamo Re A Level or I   | 0 | 60  | N | Distinction |
| 513854 | M | Addis Abak Lower Thar    | 0 | 90  | N | Withdrawn   |
| 513934 | M | Sidamo Re Lower Thar     | 0 | 60  | N | Withdrawn   |
| 513969 | F | Oromia Re A Level or I   | 0 | 90  | N | Withdrawn   |

|        |   |                          |   |     |   |             |
|--------|---|--------------------------|---|-----|---|-------------|
| 513997 | M | Oromia Re Lower Tha      | 0 | 60  | N | Withdrawn   |
| 514000 | M | Somalia Re A Level or I  | 0 | 30  | N | Fail        |
| 514186 | F | Afar Region HE Qualific  | 0 | 90  | Y | Fail        |
| 515046 | M | South Wes Lower Tha      | 0 | 60  | Y | Pass        |
| 515107 | M | North Regi A Level or I  | 0 | 60  | N | Pass        |
| 515278 | M | Sidamo Re A Level or I   | 0 | 30  | N | Fail        |
| 515515 | M | South Wes A Level or I   | 0 | 60  | N | Fail        |
| 515774 | M | Afar Region A Level or I | 0 | 60  | N | Pass        |
| 515936 | M | Amhara Re Lower Tha      | 0 | 180 | Y | Withdrawn   |
| 516024 | M | South Regi Lower Tha     | 0 | 60  | N | Pass        |
| 516238 | M | South Wes Lower Tha      | 0 | 60  | N | Distinction |
| 516496 | M | Afar Region Lower Tha    | 0 | 30  | N | Pass        |
| 516685 | M | South Regi A Level or I  | 0 | 60  | N | Withdrawn   |
| 516726 | M | Addis Abak A Level or I  | 0 | 60  | N | Distinction |
| 517999 | F | North Regi Lower Tha     | 0 | 40  | N | Distinction |
| 518116 | M | South Regi Lower Tha     | 0 | 60  | N | Fail        |
| 518330 | F | South Wes A Level or I   | 0 | 90  | N | Withdrawn   |
| 518363 | M | Oromia Re HE Qualific    | 0 | 150 | N | Pass        |
| 518862 | M | Addis Abak A Level or I  | 0 | 60  | N | Pass        |
| 519544 | F | South Regi Lower Tha     | 0 | 60  | N | Pass        |
| 519589 | M | Tigrai Regi A Level or I | 0 | 60  | N | Fail        |
| 520332 | M | Afar Region A Level or I | 0 | 60  | N | Withdrawn   |
| 520377 | F | South Regi A Level or I  | 0 | 30  | N | Pass        |
| 520588 | M | Addis Abak Lower Tha     | 0 | 60  | N | Fail        |
| 521051 | M | Amhara Re A Level or I   | 0 | 60  | N | Pass        |
| 521297 | M | Oromia Re A Level or I   | 0 | 60  | Y | Pass        |
| 521542 | M | Afar Region A Level or I | 0 | 90  | N | Fail        |
| 521601 | F | Addis Abak A Level or I  | 0 | 60  | N | Withdrawn   |
| 521614 | M | South Regi HE Qualific   | 0 | 60  | N | Distinction |
| 522312 | M | Sidamo Re A Level or I   | 0 | 90  | N | Pass        |
| 522484 | M | South Regi A Level or I  | 0 | 60  | N | Fail        |
| 522682 | M | South Regi Lower Tha     | 0 | 60  | N | Withdrawn   |
| 523061 | M | Amhara Re A Level or I   | 0 | 120 | N | Pass        |
| 523079 | M | South Wes A Level or I   | 0 | 60  | N | Pass        |
| 523239 | M | Tigrai Regi Lower Tha    | 0 | 60  | N | Withdrawn   |
| 523271 | F | Tigrai Regi HE Qualific  | 0 | 30  | N | Withdrawn   |
| 523335 | M | South Wes HE Qualific    | 0 | 30  | N | Withdrawn   |
| 523710 | M | Somalia Re A Level or I  | 0 | 30  | N | Fail        |
| 524128 | M | Afar Region Lower Tha    | 0 | 60  | N | Distinction |
| 524295 | F | South Regi A Level or I  | 0 | 60  | N | Pass        |
| 524378 | F | Amhara Re A Level or I   | 0 | 60  | N | Pass        |
| 524386 | M | South Regi A Level or I  | 0 | 120 | N | Fail        |
| 525332 | M | Sidamo Re Lower Tha      | 0 | 60  | Y | Fail        |
| 525832 | F | Afar Region HE Qualific  | 0 | 60  | N | Pass        |
| 526073 | M | Amhara Re A Level or I   | 0 | 60  | N | Withdrawn   |
| 526235 | M | Sidamo Re HE Qualific    | 0 | 90  | N | Withdrawn   |
| 526547 | F | Tigrai Regi HE Qualific  | 0 | 90  | N | Withdrawn   |

|        |   |             |             |   |     |   |             |
|--------|---|-------------|-------------|---|-----|---|-------------|
| 526564 | M | Tigrai Regi | HE Qualific | 0 | 90  | N | Withdrawn   |
| 526876 | M | Afar Regio  | Lower Than  | 0 | 60  | N | Fail        |
| 526927 | M | Afar Regio  | A Level or  | 0 | 120 | N | Pass        |
| 527771 | M | Sidamo Re   | Lower Than  | 0 | 60  | N | Fail        |
| 527826 | F | Tigrai Regi | HE Qualific | 0 | 90  | N | Distinction |
| 527964 | M | Addis Abak  | A Level or  | 0 | 30  | N | Pass        |
| 528021 | M | South Regi  | Lower Than  | 0 | 60  | N | Withdrawn   |
| 528023 | M | South Regi  | Lower Than  | 0 | 90  | N | Fail        |
| 528066 | M | South Wes   | HE Qualific | 0 | 60  | N | Pass        |
| 528083 | M | Oromia Re   | A Level or  | 0 | 60  | N | Withdrawn   |
| 528892 | M | South Wes   | A Level or  | 0 | 90  | N | Pass        |
| 529025 | M | South Regi  | A Level or  | 0 | 60  | N | Pass        |
| 529073 | M | Amhara Re   | Lower Than  | 0 | 90  | N | Withdrawn   |
| 529078 | M | South Regi  | HE Qualific | 0 | 60  | N | Fail        |
| 529153 | M | South Regi  | Lower Than  | 0 | 30  | N | Withdrawn   |
| 529434 | M | Addis Abak  | Lower Than  | 0 | 30  | N | Pass        |
| 530113 | M | South Wes   | A Level or  | 0 | 120 | N | Withdrawn   |
| 530270 | M | South Regi  | A Level or  | 0 | 150 | N | Withdrawn   |
| 530481 | M | South Regi  | Lower Than  | 0 | 30  | N | Withdrawn   |
| 530650 | M | Sidamo Re   | HE Qualific | 0 | 90  | N | Pass        |
| 530936 | M | Amhara Re   | A Level or  | 0 | 30  | N | Withdrawn   |
| 531047 | M | South Wes   | Lower Than  | 0 | 60  | N | Withdrawn   |
| 531075 | M | North Regi  | Lower Than  | 0 | 60  | N | Withdrawn   |
| 532020 | M | Afar Regio  | HE Qualific | 0 | 90  | N | Pass        |
| 532252 | M | South Wes   | Lower Than  | 0 | 30  | N | Withdrawn   |
| 532350 | M | South Regi  | HE Qualific | 0 | 30  | N | Pass        |
| 532440 | M | Oromia Re   | Lower Than  | 0 | 150 | N | Withdrawn   |
| 532531 | M | Sidamo Re   | Lower Than  | 0 | 120 | N | Fail        |
| 532565 | M | Sidamo Re   | Lower Than  | 0 | 120 | N | Withdrawn   |
| 532718 | M | Amhara Re   | HE Qualific | 0 | 30  | N | Pass        |
| 532859 | M | Afar Regio  | HE Qualific | 0 | 180 | N | Fail        |
| 533004 | M | South Regi  | HE Qualific | 0 | 60  | N | Fail        |
| 533311 | M | Oromia Re   | A Level or  | 0 | 60  | N | Withdrawn   |
| 534047 | M | South Wes   | HE Qualific | 0 | 30  | N | Withdrawn   |
| 534074 | M | Addis Abak  | HE Qualific | 0 | 60  | N | Withdrawn   |
| 535047 | M | Oromia Re   | A Level or  | 0 | 30  | N | Pass        |
| 535590 | M | Amhara Re   | Lower Than  | 0 | 90  | Y | Withdrawn   |
| 535682 | M | Tigrai Regi | Lower Than  | 0 | 30  | N | Fail        |
| 536032 | M | Tigrai Regi | A Level or  | 0 | 30  | N | Fail        |
| 536170 | M | Amhara Re   | HE Qualific | 0 | 90  | N | Distinction |
| 536261 | M | South Regi  | A Level or  | 0 | 60  | N | Pass        |
| 536435 | M | Amhara Re   | A Level or  | 0 | 90  | N | Fail        |
| 536536 | M | North Regi  | Lower Than  | 0 | 60  | N | Withdrawn   |
| 537322 | M | Afar Regio  | A Level or  | 0 | 90  | N | Pass        |
| 537603 | M | Addis Abak  | Lower Than  | 0 | 60  | N | Fail        |
| 537606 | F | Sidamo Re   | A Level or  | 0 | 60  | N | Fail        |
| 537622 | F | Amhara Re   | A Level or  | 0 | 90  | Y | Withdrawn   |

|        |   |                          |   |     |   |             |
|--------|---|--------------------------|---|-----|---|-------------|
| 537654 | M | North Regi A Level or I  | 0 | 30  | Y | Withdrawn   |
| 537658 | F | Tigrai Regi Lower Tha    | 0 | 90  | N | Fail        |
| 538887 | M | South Wes Lower Tha      | 0 | 60  | N | Withdrawn   |
| 539328 | M | South Wes A Level or I   | 0 | 60  | N | Withdrawn   |
| 539514 | F | North Regi Lower Tha     | 0 | 30  | N | Fail        |
| 539695 | M | Amhara Re Lower Tha      | 0 | 60  | Y | Withdrawn   |
| 539784 | M | Sidamo Re A Level or I   | 0 | 60  | N | Pass        |
| 539971 | F | Tigrai Regi HE Qualific  | 0 | 90  | N | Pass        |
| 540509 | M | Oromia Re Lower Tha      | 0 | 60  | N | Withdrawn   |
| 540686 | M | Amhara Re Lower Tha      | 0 | 60  | N | Pass        |
| 540937 | M | Sidamo Re HE Qualific    | 0 | 60  | N | Withdrawn   |
| 541003 | M | South Regi A Level or I  | 0 | 60  | N | Fail        |
| 541184 | M | North Regi A Level or I  | 0 | 30  | N | Withdrawn   |
| 542050 | M | South Regi HE Qualific   | 0 | 60  | N | Withdrawn   |
| 542721 | F | South Regi A Level or I  | 0 | 60  | N | Fail        |
| 543170 | M | Amhara Re Lower Tha      | 0 | 90  | Y | Pass        |
| 543417 | M | Somalia Re A Level or I  | 0 | 60  | N | Withdrawn   |
| 543475 | M | South Wes A Level or I   | 0 | 60  | N | Fail        |
| 543571 | M | North Regi Lower Tha     | 0 | 60  | N | Withdrawn   |
| 543628 | M | Amhara Re HE Qualific    | 0 | 90  | N | Withdrawn   |
| 543678 | M | Sidamo Re A Level or I   | 0 | 90  | N | Pass        |
| 543924 | M | South Regi A Level or I  | 0 | 60  | N | Fail        |
| 543948 | M | South Wes Lower Tha      | 0 | 60  | N | Pass        |
| 544075 | M | North Regi A Level or I  | 0 | 30  | N | Withdrawn   |
| 544090 | M | Oromia Re A Level or I   | 0 | 120 | N | Fail        |
| 544467 | M | Sidamo Re Lower Tha      | 0 | 60  | N | Withdrawn   |
| 544490 | M | South Regi A Level or I  | 0 | 90  | N | Pass        |
| 544594 | M | Sidamo Re A Level or I   | 0 | 90  | N | Distinction |
| 544791 | M | Afar Regioi A Level or I | 0 | 60  | N | Withdrawn   |
| 544839 | M | Tigrai Regi A Level or I | 0 | 60  | N | Distinction |
| 545045 | M | Amhara Re Lower Tha      | 0 | 60  | N | Fail        |
| 545740 | M | South Wes A Level or I   | 0 | 60  | N | Pass        |
| 545747 | M | Addis Abak HE Qualific   | 0 | 60  | N | Pass        |
| 546400 | F | Afar Regioi A Level or I | 0 | 120 | N | Withdrawn   |
| 546675 | F | South Wes A Level or I   | 0 | 90  | N | Withdrawn   |
| 546830 | F | Sidamo Re A Level or I   | 0 | 90  | N | Withdrawn   |
| 546954 | M | Sidamo Re HE Qualific    | 0 | 30  | N | Withdrawn   |
| 547287 | M | Oromia Re HE Qualific    | 0 | 30  | N | Distinction |
| 547332 | F | South Regi HE Qualific   | 0 | 60  | N | Withdrawn   |
| 547413 | F | Amhara Re No Formal      | 0 | 90  | N | Fail        |
| 547571 | M | Oromia Re A Level or I   | 0 | 30  | N | Withdrawn   |
| 547685 | M | Afar Regioi A Level or I | 0 | 60  | N | Withdrawn   |
| 547816 | F | Amhara Re Lower Tha      | 0 | 210 | N | Withdrawn   |
| 547986 | F | South Regi A Level or I  | 0 | 30  | N | Withdrawn   |
| 548261 | M | Addis Abak Lower Tha     | 0 | 120 | N | Fail        |
| 548383 | F | Sidamo Re HE Qualific    | 0 | 30  | N | Withdrawn   |
| 548386 | M | Sidamo Re HE Qualific    | 0 | 60  | N | Distinction |

|        |   |                          |   |     |   |             |
|--------|---|--------------------------|---|-----|---|-------------|
| 548509 | M | Sidamo Re HE Qualific    | 0 | 30  | N | Distinction |
| 548602 | M | South Regi A Level or I  | 0 | 60  | N | Pass        |
| 548677 | M | South Wes A Level or I   | 0 | 60  | N | Pass        |
| 548764 | M | Addis Abak A Level or I  | 0 | 60  | N | Fail        |
| 548854 | M | North Regi Post Gradu    | 0 | 60  | N | Pass        |
| 548926 | F | Addis Abak A Level or I  | 0 | 120 | N | Withdrawn   |
| 549636 | F | Somalia Re A Level or I  | 0 | 60  | Y | Withdrawn   |
| 549928 | M | South Wes A Level or I   | 0 | 90  | N | Fail        |
| 549951 | F | North Regi A Level or I  | 0 | 90  | N | Pass        |
| 550092 | M | Addis Abak A Level or I  | 0 | 90  | N | Fail        |
| 550545 | F | Afar Regioi A Level or I | 0 | 60  | N | Withdrawn   |
| 550812 | M | Afar Regioi A Level or I | 0 | 150 | N | Withdrawn   |
| 550893 | M | North Regi A Level or I  | 0 | 90  | N | Withdrawn   |
| 551115 | M | Tigrai Regi A Level or I | 0 | 30  | N | Pass        |
| 551267 | F | North Regi A Level or I  | 0 | 120 | N | Pass        |
| 551304 | F | South Wes Lower Thar     | 0 | 90  | N | Pass        |
| 551478 | M | South Wes A Level or I   | 0 | 60  | N | Pass        |
| 551528 | M | Sidamo Re Lower Thar     | 0 | 120 | N | Withdrawn   |
| 551604 | M | South Regi A Level or I  | 0 | 30  | N | Fail        |
| 551856 | M | North Regi Lower Thar    | 0 | 60  | N | Fail        |
| 551902 | M | Addis Abak Lower Thar    | 0 | 60  | N | Fail        |
| 552166 | M | South Regi Lower Thar    | 0 | 60  | N | Withdrawn   |
| 552234 | M | Oromia Re HE Qualific    | 0 | 60  | N | Withdrawn   |
| 552441 | F | Sidamo Re A Level or I   | 0 | 30  | N | Distinction |
| 552498 | F | Afar Regioi A Level or I | 0 | 60  | N | Withdrawn   |
| 552590 | M | South Wes A Level or I   | 0 | 90  | N | Withdrawn   |
| 552913 | M | Sidamo Re Lower Thar     | 0 | 150 | N | Pass        |
| 553021 | M | South Wes A Level or I   | 0 | 60  | N | Distinction |
| 553280 | F | South Regi A Level or I  | 0 | 120 | N | Distinction |
| 553394 | F | Sidamo Re HE Qualific    | 0 | 90  | N | Pass        |
| 553410 | F | Sidamo Re Lower Thar     | 0 | 60  | Y | Withdrawn   |
| 553568 | M | South Wes A Level or I   | 0 | 60  | N | Withdrawn   |
| 553655 | F | Somalia Re A Level or I  | 0 | 60  | N | Pass        |
| 553741 | M | South Regi A Level or I  | 0 | 60  | N | Withdrawn   |
| 554141 | M | Addis Abak Lower Thar    | 0 | 30  | N | Pass        |
| 554205 | M | South Wes Lower Thar     | 0 | 60  | N | Fail        |
| 554470 | M | South Regi Lower Thar    | 0 | 90  | N | Withdrawn   |
| 554583 | M | Afar Regioi Lower Thar   | 0 | 90  | N | Pass        |
| 554588 | F | North Regi HE Qualific   | 0 | 90  | N | Withdrawn   |
| 554870 | M | South Regi Lower Thar    | 0 | 30  | N | Pass        |
| 554951 | F | Somalia Re A Level or I  | 0 | 60  | Y | Pass        |
| 555008 | M | Sidamo Re A Level or I   | 0 | 60  | N | Pass        |
| 555368 | M | Tigrai Regi HE Qualific  | 0 | 30  | N | Withdrawn   |
| 555604 | M | Sidamo Re A Level or I   | 0 | 90  | N | Pass        |
| 555706 | F | Somalia Re Lower Thar    | 0 | 60  | N | Distinction |
| 555953 | M | South Regi Lower Thar    | 0 | 30  | N | Withdrawn   |
| 556007 | F | Addis Abak A Level or I  | 0 | 90  | N | Withdrawn   |



|        |   |                         |   |     |   |             |
|--------|---|-------------------------|---|-----|---|-------------|
| 556042 | M | Addis Abak A Level or I | 0 | 60  | N | Withdrawn   |
| 556109 | M | South Wes Lower Tha     | 0 | 60  | N | Withdrawn   |
| 556246 | M | North Regi Lower Tha    | 0 | 60  | N | Distinction |
| 556295 | M | North Regi Lower Tha    | 0 | 30  | N | Distinction |
| 556521 | M | Addis Abak A Level or I | 0 | 60  | Y | Withdrawn   |
| 556584 | M | Addis Abak HE Qualific  | 0 | 60  | N | Pass        |
| 556587 | M | Sidamo Re A Level or I  | 0 | 60  | N | Fail        |
| 556709 | M | South Wes A Level or I  | 0 | 60  | N | Withdrawn   |
| 556858 | F | South Regi A Level or I | 0 | 30  | N | Pass        |
| 556918 | M | South Regi A Level or I | 0 | 30  | N | Withdrawn   |
| 557172 | M | Addis Abak Lower Tha    | 0 | 30  | N | Fail        |
| 557700 | M | North Regi Post Gradu   | 0 | 60  | N | Withdrawn   |
| 557849 | M | Afar Regio HE Qualific  | 0 | 90  | N | Withdrawn   |
| 557995 | M | Sidamo Re HE Qualific   | 0 | 120 | N | Withdrawn   |
| 558122 | M | Afar Regio Post Gradu   | 0 | 60  | N | Fail        |
| 558444 | F | Sidamo Re Lower Tha     | 0 | 180 | N | Fail        |
| 558471 | M | South Regi A Level or I | 0 | 60  | N | Withdrawn   |
| 558518 | M | South Regi HE Qualific  | 0 | 30  | N | Pass        |
| 558616 | M | North Regi Lower Tha    | 0 | 30  | N | Pass        |
| 558806 | M | South Regi A Level or I | 0 | 30  | N | Withdrawn   |
| 558914 | F | Amhara Re A Level or I  | 0 | 90  | N | Fail        |
| 559157 | M | Oromia Re Lower Tha     | 0 | 60  | N | Withdrawn   |
| 559469 | F | North Regi Lower Tha    | 0 | 30  | N | Withdrawn   |
| 559706 | M | Somalia Re Lower Tha    | 0 | 30  | N | Pass        |
| 559770 | M | Oromia Re HE Qualific   | 0 | 60  | N | Pass        |
| 559912 | M | Somalia Re Lower Tha    | 0 | 60  | N | Withdrawn   |
| 559977 | M | Sidamo Re Lower Tha     | 0 | 60  | N | Fail        |
| 560114 | M | Amhara Re A Level or I  | 0 | 30  | Y | Pass        |
| 560311 | M | Addis Abak Lower Tha    | 0 | 60  | N | Distinction |
| 560494 | M | Sidamo Re A Level or I  | 0 | 90  | Y | Pass        |
| 560784 | M | South Regi Lower Tha    | 0 | 60  | N | Withdrawn   |
| 560951 | M | Oromia Re A Level or I  | 0 | 60  | N | Fail        |
| 561363 | M | Afar Regio Post Gradu   | 0 | 60  | N | Pass        |
| 561559 | M | South Regi HE Qualific  | 0 | 60  | N | Pass        |
| 561774 | M | Afar Regio A Level or I | 0 | 90  | N | Pass        |
| 561823 | M | Oromia Re A Level or I  | 0 | 120 | N | Withdrawn   |
| 562450 | F | South Regi A Level or I | 0 | 120 | N | Pass        |
| 562585 | F | Oromia Re No Formal     | 0 | 90  | N | Withdrawn   |
| 562825 | M | Somalia Re HE Qualific  | 0 | 60  | N | Pass        |
| 563046 | M | Addis Abak A Level or I | 0 | 60  | N | Pass        |
| 563556 | F | Sidamo Re A Level or I  | 0 | 90  | N | Withdrawn   |
| 563631 | M | South Regi A Level or I | 0 | 90  | N | Fail        |
| 563819 | M | Oromia Re A Level or I  | 0 | 90  | Y | Pass        |
| 563967 | M | South Regi A Level or I | 0 | 60  | N | Withdrawn   |
| 564325 | F | Amhara Re Lower Tha     | 0 | 120 | Y | Withdrawn   |
| 564444 | M | Sidamo Re Lower Tha     | 0 | 60  | N | Withdrawn   |
| 564700 | M | South Regi Lower Tha    | 0 | 120 | N | Withdrawn   |

|        |   |                         |   |     |   |             |
|--------|---|-------------------------|---|-----|---|-------------|
| 564841 | F | South Regi HE Qualific  | 0 | 60  | N | Withdrawn   |
| 565275 | M | South Regi A Level or I | 0 | 150 | N | Withdrawn   |
| 565399 | M | Sidamo Re HE Qualific   | 0 | 30  | N | Distinction |
| 565838 | M | Somalia Re A Level or I | 0 | 60  | N | Fail        |
| 565883 | M | Afar Regio Lower Than   | 0 | 60  | N | Withdrawn   |
| 566185 | F | South Regi A Level or I | 0 | 120 | N | Fail        |
| 566310 | M | Afar Regio A Level or I | 0 | 60  | N | Pass        |
| 566428 | M | South Wes A Level or I  | 0 | 60  | N | Distinction |
| 566664 | M | Sidamo Re A Level or I  | 0 | 90  | N | Withdrawn   |
| 566670 | M | South Regi Lower Than   | 0 | 60  | N | Pass        |
| 566704 | F | Tigrai Regi HE Qualific | 0 | 90  | N | Withdrawn   |
| 566715 | F | South Regi A Level or I | 0 | 90  | N | Pass        |
| 566871 | M | Sidamo Re Lower Than    | 0 | 90  | N | Fail        |
| 566872 | F | Oromia Re A Level or I  | 0 | 60  | N | Withdrawn   |
| 568047 | F | Sidamo Re HE Qualific   | 0 | 60  | N | Fail        |
| 568084 | M | Somalia Re A Level or I | 0 | 120 | N | Distinction |
| 569080 | M | Sidamo Re A Level or I  | 0 | 30  | N | Distinction |
| 569108 | M | Oromia Re A Level or I  | 0 | 30  | Y | Distinction |
| 569342 | M | South Regi Lower Than   | 0 | 120 | N | Fail        |
| 569609 | F | South Regi A Level or I | 0 | 120 | N | Pass        |
| 569712 | M | South Regi Lower Than   | 0 | 120 | Y | Withdrawn   |
| 569928 | M | Oromia Re A Level or I  | 0 | 150 | N | Withdrawn   |
| 570113 | F | Sidamo Re A Level or I  | 0 | 120 | N | Withdrawn   |
| 570377 | M | Amhara Re Lower Than    | 0 | 60  | N | Withdrawn   |
| 570410 | F | Addis Abak No Formal    | 0 | 60  | N | Pass        |
| 570488 | M | Somalia Re A Level or I | 0 | 60  | N | Withdrawn   |
| 570514 | F | Sidamo Re A Level or I  | 0 | 60  | N | Withdrawn   |
| 570872 | F | Sidamo Re A Level or I  | 0 | 90  | Y | Pass        |
| 570967 | F | Sidamo Re Lower Than    | 0 | 60  | N | Pass        |
| 571025 | M | Addis Abak No Formal    | 0 | 60  | N | Withdrawn   |
| 571128 | M | Afar Regio HE Qualific  | 0 | 60  | N | Withdrawn   |
| 571129 | M | Afar Regio HE Qualific  | 0 | 30  | Y | Distinction |
| 571233 | M | South Wes Lower Than    | 0 | 60  | N | Withdrawn   |
| 571276 | F | South Regi Lower Than   | 0 | 60  | N | Withdrawn   |
| 571365 | F | North Regi A Level or I | 0 | 60  | N | Withdrawn   |
| 571389 | F | Amhara Re Lower Than    | 0 | 60  | N | Withdrawn   |
| 571571 | F | Addis Abak HE Qualific  | 0 | 90  | N | Distinction |
| 571595 | M | Afar Regio Lower Than   | 0 | 90  | N | Fail        |
| 571702 | M | Amhara Re Lower Than    | 0 | 90  | N | Withdrawn   |
| 571776 | M | North Regi A Level or I | 0 | 120 | N | Pass        |
| 571992 | M | Sidamo Re Lower Than    | 0 | 120 | N | Withdrawn   |
| 572036 | M | Somalia Re Lower Than   | 0 | 120 | N | Pass        |
| 572154 | M | Afar Regio HE Qualific  | 0 | 150 | N | Withdrawn   |
| 572241 | F | Sidamo Re A Level or I  | 0 | 120 | N | Withdrawn   |
| 572279 | M | Addis Abak Lower Than   | 0 | 90  | N | Withdrawn   |
| 572303 | M | Afar Regio HE Qualific  | 0 | 90  | N | Pass        |
| 572382 | M | South Regi A Level or I | 0 | 120 | N | Fail        |

|        |   |                          |   |     |   |             |
|--------|---|--------------------------|---|-----|---|-------------|
| 572401 | M | Oromia Re Lower Tha      | 0 | 90  | N | Fail        |
| 572438 | F | South Wes A Level or I   | 0 | 60  | N | Pass        |
| 572570 | M | Afar Regio A Level or I  | 0 | 60  | N | Pass        |
| 572854 | F | Oromia Re A Level or I   | 0 | 90  | N | Distinction |
| 572891 | M | Sidamo Re A Level or I   | 0 | 60  | N | Pass        |
| 572909 | M | Oromia Re A Level or I   | 0 | 120 | N | Withdrawn   |
| 573153 | M | Sidamo Re Lower Tha      | 0 | 90  | N | Withdrawn   |
| 573166 | M | South Regi A Level or I  | 0 | 90  | N | Withdrawn   |
| 573197 | F | Sidamo Re Lower Tha      | 0 | 60  | N | Withdrawn   |
| 573377 | M | Oromia Re Lower Tha      | 0 | 60  | N | Pass        |
| 573440 | M | Afar Regio Lower Tha     | 0 | 120 | N | Pass        |
| 573462 | F | Tigrai Regi HE Qualific  | 0 | 60  | N | Withdrawn   |
| 573558 | M | North Regi A Level or I  | 0 | 60  | N | Pass        |
| 573662 | M | Sidamo Re A Level or I   | 0 | 60  | N | Withdrawn   |
| 573665 | M | South Regi Lower Tha     | 0 | 60  | N | Withdrawn   |
| 573696 | M | Sidamo Re A Level or I   | 0 | 90  | N | Fail        |
| 573697 | F | South Regi HE Qualific   | 0 | 180 | N | Withdrawn   |
| 573701 | M | Afar Regio Lower Tha     | 0 | 150 | N | Fail        |
| 574221 | M | Sidamo Re HE Qualific    | 0 | 30  | N | Distinction |
| 574283 | M | South Regi A Level or I  | 0 | 120 | N | Fail        |
| 574523 | M | Oromia Re A Level or I   | 0 | 90  | N | Withdrawn   |
| 574529 | F | South Wes A Level or I   | 0 | 120 | N | Fail        |
| 574551 | M | Afar Regio A Level or I  | 0 | 90  | N | Fail        |
| 574564 | M | Sidamo Re HE Qualific    | 0 | 90  | N | Withdrawn   |
| 574580 | F | North Regi Lower Tha     | 0 | 150 | Y | Fail        |
| 574663 | M | Sidamo Re Lower Tha      | 0 | 240 | N | Withdrawn   |
| 574817 | F | South Wes A Level or I   | 0 | 90  | N | Distinction |
| 574830 | F | Afar Regio Lower Tha     | 0 | 90  | N | Withdrawn   |
| 575166 | M | Addis Abak A Level or I  | 0 | 60  | N | Withdrawn   |
| 575287 | F | South Regi A Level or I  | 0 | 120 | N | Withdrawn   |
| 575419 | M | South Regi Lower Tha     | 0 | 90  | N | Withdrawn   |
| 575545 | M | Afar Regio HE Qualific   | 0 | 60  | N | Withdrawn   |
| 575703 | M | Addis Abak A Level or I  | 0 | 60  | N | Withdrawn   |
| 575733 | M | Tigrai Regi Lower Tha    | 0 | 60  | N | Pass        |
| 575745 | F | North Regi HE Qualific   | 0 | 130 | N | Pass        |
| 575824 | F | Tigrai Regi A Level or I | 0 | 90  | N | Pass        |
| 575967 | M | Tigrai Regi A Level or I | 0 | 150 | N | Distinction |
| 576191 | M | Afar Regio HE Qualific   | 0 | 120 | N | Fail        |
| 576383 | F | Oromia Re A Level or I   | 0 | 120 | N | Distinction |
| 576413 | M | North Regi A Level or I  | 0 | 120 | N | Distinction |
| 576475 | F | North Regi A Level or I  | 0 | 120 | N | Pass        |
| 576516 | M | Addis Abak A Level or I  | 0 | 60  | N | Fail        |
| 576780 | M | Addis Abak A Level or I  | 0 | 120 | N | Distinction |
| 576782 | M | Amhara Re HE Qualific    | 0 | 90  | N | Fail        |
| 577035 | M | South Regi HE Qualific   | 0 | 90  | N | Distinction |
| 577236 | F | South Regi A Level or I  | 0 | 60  | N | Distinction |
| 577245 | M | South Regi Lower Tha     | 0 | 60  | N | Fail        |

|        |   |                            |   |     |   |             |
|--------|---|----------------------------|---|-----|---|-------------|
| 577273 | F | Somalia Re A Level or I    | 0 | 60  | N | Fail        |
| 577352 | M | Addis Abak Lower Tha       | 0 | 120 | N | Fail        |
| 577414 | M | Afar Region HE Qualific    | 0 | 120 | N | Pass        |
| 577427 | M | Afar Region A Level or I   | 0 | 90  | N | Withdrawn   |
| 577502 | F | Tigray Region A Level or I | 0 | 90  | N | Pass        |
| 577603 | M | North Region Lower Tha     | 0 | 120 | N | Withdrawn   |
| 577686 | M | North Region A Level or I  | 0 | 60  | N | Fail        |
| 577688 | M | South Region Lower Tha     | 0 | 90  | N | Withdrawn   |
| 578034 | M | North Region A Level or I  | 0 | 60  | N | Withdrawn   |
| 578189 | F | South Region A Level or I  | 0 | 120 | N | Pass        |
| 578450 | F | Addis Abak Lower Tha       | 0 | 120 | N | Fail        |
| 578541 | F | Somalia Re A Level or I    | 0 | 60  | N | Withdrawn   |
| 578655 | F | South Wes A Level or I     | 0 | 150 | N | Pass        |
| 578823 | M | Addis Abak A Level or I    | 0 | 180 | N | Withdrawn   |
| 578850 | M | South Region A Level or I  | 0 | 90  | N | Pass        |
| 578958 | M | Tigray Region Lower Tha    | 0 | 135 | N | Pass        |
| 579027 | M | Afar Region HE Qualific    | 0 | 90  | N | Fail        |
| 579321 | M | Oromia Re Lower Tha        | 0 | 180 | N | Withdrawn   |
| 579340 | M | South Region Lower Tha     | 0 | 90  | N | Withdrawn   |
| 579343 | M | South Region HE Qualific   | 0 | 60  | N | Pass        |
| 579372 | M | Sidamo Re Lower Tha        | 0 | 150 | N | Withdrawn   |
| 579550 | M | Tigray Region A Level or I | 0 | 120 | Y | Pass        |
| 580477 | M | Addis Abak Lower Tha       | 0 | 120 | Y | Withdrawn   |
| 580511 | M | Afar Region HE Qualific    | 0 | 90  | N | Withdrawn   |
| 580525 | M | North Region HE Qualific   | 0 | 60  | N | Distinction |
| 580689 | M | Afar Region HE Qualific    | 0 | 90  | Y | Withdrawn   |
| 580722 | M | South Region A Level or I  | 0 | 60  | Y | Withdrawn   |
| 580768 | M | South Region A Level or I  | 0 | 120 | N | Withdrawn   |
| 580779 | F | Somalia Re A Level or I    | 0 | 90  | N | Pass        |
| 581123 | M | South Region A Level or I  | 0 | 150 | N | Withdrawn   |
| 581328 | M | Sidamo Re Lower Tha        | 0 | 90  | N | Withdrawn   |
| 581611 | F | Sidamo Re HE Qualific      | 0 | 90  | N | Pass        |
| 581614 | M | Addis Abak A Level or I    | 0 | 120 | N | Pass        |
| 581744 | M | Oromia Re Lower Tha        | 0 | 60  | N | Withdrawn   |
| 581745 | M | North Region Lower Tha     | 0 | 60  | N | Withdrawn   |
| 582087 | M | Afar Region Lower Tha      | 0 | 90  | N | Fail        |
| 582108 | M | Sidamo Re A Level or I     | 0 | 90  | N | Fail        |
| 582723 | M | North Region Lower Tha     | 0 | 60  | N | Withdrawn   |
| 582827 | M | Addis Abak A Level or I    | 0 | 60  | N | Withdrawn   |
| 582879 | M | Addis Abak Lower Tha       | 0 | 90  | N | Pass        |
| 582950 | M | Afar Region HE Qualific    | 0 | 90  | N | Distinction |
| 583032 | M | Afar Region HE Qualific    | 0 | 60  | N | Pass        |
| 583051 | M | Somalia Re Lower Tha       | 0 | 180 | N | Withdrawn   |
| 583052 | M | Addis Abak A Level or I    | 0 | 60  | N | Pass        |
| 583192 | F | Afar Region HE Qualific    | 0 | 60  | N | Pass        |
| 583238 | M | Addis Abak Lower Tha       | 0 | 60  | N | Withdrawn   |
| 583906 | M | Sidamo Re A Level or I     | 0 | 30  | N | Distinction |

|        |   |                          |   |     |   |             |
|--------|---|--------------------------|---|-----|---|-------------|
| 584077 | M | Amhara Re A Level or I   | 0 | 150 | N | Withdrawn   |
| 584191 | M | Somalia Re HE Qualific   | 0 | 60  | N | Pass        |
| 584305 | M | Afar Region A Level or I | 0 | 150 | N | Withdrawn   |
| 584446 | F | South Wes HE Qualific    | 0 | 120 | N | Pass        |
| 584468 | F | Amhara Re A Level or I   | 0 | 120 | N | Withdrawn   |
| 584586 | M | South Regi A Level or I  | 0 | 120 | Y | Withdrawn   |
| 584749 | F | South Regi Lower Tha     | 0 | 180 | N | Withdrawn   |
| 584756 | M | Sidamo Re Lower Tha      | 0 | 120 | N | Fail        |
| 584771 | M | Afar Region HE Qualific  | 0 | 90  | N | Withdrawn   |
| 584913 | M | Amhara Re A Level or I   | 0 | 60  | N | Withdrawn   |
| 584940 | M | Addis Abak A Level or I  | 0 | 60  | N | Pass        |
| 585011 | M | Afar Region HE Qualific  | 0 | 120 | N | Withdrawn   |
| 585057 | M | North Regi HE Qualific   | 0 | 90  | N | Pass        |
| 585093 | M | North Regi Post Gradu    | 0 | 90  | N | Distinction |
| 585383 | M | Oromia Re A Level or I   | 0 | 120 | N | Pass        |
| 585393 | M | South Wes A Level or I   | 0 | 60  | N | Distinction |
| 585397 | M | Addis Abak A Level or I  | 0 | 60  | N | Pass        |
| 585433 | M | Afar Region HE Qualific  | 0 | 60  | N | Withdrawn   |
| 585455 | M | Afar Region A Level or I | 0 | 60  | N | Pass        |
| 585464 | M | South Regi A Level or I  | 0 | 60  | N | Withdrawn   |
| 585681 | M | Sidamo Re HE Qualific    | 0 | 60  | N | Withdrawn   |
| 585695 | M | South Wes A Level or I   | 0 | 90  | Y | Distinction |
| 585709 | F | South Wes A Level or I   | 0 | 90  | N | Pass        |
| 585769 | F | Afar Region Post Gradu   | 0 | 90  | N | Withdrawn   |
| 585900 | M | Somalia Re A Level or I  | 0 | 90  | N | Fail        |
| 586060 | M | South Regi Lower Tha     | 0 | 60  | N | Fail        |
| 586132 | M | Addis Abak A Level or I  | 0 | 60  | N | Withdrawn   |
| 586436 | F | Addis Abak Lower Tha     | 0 | 60  | Y | Fail        |
| 586473 | M | Somalia Re A Level or I  | 0 | 60  | Y | Fail        |
| 586476 | F | Oromia Re A Level or I   | 0 | 120 | N | Withdrawn   |
| 586526 | M | South Regi A Level or I  | 0 | 120 | N | Withdrawn   |
| 586716 | M | Afar Region HE Qualific  | 0 | 90  | N | Withdrawn   |
| 586921 | M | Addis Abak Lower Tha     | 0 | 60  | N | Withdrawn   |
| 586962 | M | South Regi A Level or I  | 0 | 90  | N | Withdrawn   |
| 587122 | M | Afar Region Lower Tha    | 0 | 90  | N | Withdrawn   |
| 587179 | F | South Regi HE Qualific   | 0 | 120 | N | Withdrawn   |
| 587585 | M | Sidamo Re A Level or I   | 0 | 60  | N | Fail        |
| 587621 | F | Sidamo Re Lower Tha      | 0 | 90  | N | Withdrawn   |
| 587783 | M | Addis Abak Lower Tha     | 0 | 120 | N | Pass        |
| 587884 | M | South Wes Lower Tha      | 0 | 60  | N | Withdrawn   |
| 587906 | M | Somalia Re A Level or I  | 0 | 60  | N | Pass        |
| 587911 | M | Amhara Re A Level or I   | 0 | 60  | N | Pass        |
| 588059 | F | Somalia Re Lower Tha     | 0 | 90  | Y | Withdrawn   |
| 588125 | M | Sidamo Re Lower Tha      | 0 | 60  | N | Withdrawn   |
| 588175 | F | Sidamo Re Lower Tha      | 0 | 240 | N | Withdrawn   |
| 588219 | M | Oromia Re Lower Tha      | 0 | 90  | N | Fail        |
| 588274 | M | South Regi A Level or I  | 0 | 120 | N | Distinction |

|        |   |             |              |   |     |   |             |
|--------|---|-------------|--------------|---|-----|---|-------------|
| 588402 | M | Tigrai Regi | Lower Tha    | 0 | 60  | N | Fail        |
| 588430 | M | North Regi  | Lower Tha    | 0 | 90  | N | Pass        |
| 588460 | M | Addis Abak  | Lower Tha    | 0 | 90  | N | Withdrawn   |
| 588464 | M | Somalia Re  | A Level or I | 0 | 120 | N | Withdrawn   |
| 588473 | M | Addis Abak  | HE Qualific  | 0 | 30  | N | Distinction |
| 588524 | M | Afar Regio  | HE Qualific  | 0 | 60  | N | Pass        |
| 588590 | F | Afar Regio  | HE Qualific  | 0 | 30  | Y | Fail        |
| 588676 | M | Afar Regio  | HE Qualific  | 0 | 90  | N | Pass        |
| 588694 | M | North Regi  | Lower Tha    | 0 | 60  | N | Withdrawn   |
| 588707 | F | Tigrai Regi | A Level or I | 0 | 150 | N | Distinction |
| 588710 | M | Amhara Re   | Lower Tha    | 0 | 60  | N | Withdrawn   |
| 588846 | M | Amhara Re   | HE Qualific  | 0 | 60  | N | Fail        |
| 588956 | M | Oromia Re   | HE Qualific  | 0 | 120 | N | Pass        |
| 589018 | M | Afar Regio  | Lower Tha    | 0 | 120 | N | Withdrawn   |
| 589023 | M | North Regi  | A Level or I | 0 | 60  | N | Withdrawn   |
| 589108 | M | Oromia Re   | Lower Tha    | 0 | 90  | Y | Withdrawn   |
| 589327 | M | Afar Regio  | HE Qualific  | 0 | 60  | N | Withdrawn   |
| 589390 | F | South Wes   | Lower Tha    | 0 | 90  | N | Pass        |
| 589517 | F | South Regi  | A Level or I | 0 | 60  | N | Withdrawn   |
| 589525 | F | Somalia Re  | A Level or I | 0 | 60  | Y | Distinction |
| 589722 | M | South Wes   | A Level or I | 0 | 60  | N | Withdrawn   |
| 589894 | M | Afar Regio  | A Level or I | 0 | 60  | N | Withdrawn   |
| 590072 | M | Afar Regio  | A Level or I | 0 | 90  | N | Fail        |
| 590626 | M | Afar Regio  | Lower Tha    | 0 | 60  | N | Withdrawn   |
| 590699 | M | Addis Abak  | HE Qualific  | 0 | 120 | N | Withdrawn   |
| 590744 | F | Afar Regio  | HE Qualific  | 0 | 60  | N | Withdrawn   |
| 590762 | M | Afar Regio  | A Level or I | 0 | 120 | N | Fail        |
| 590877 | M | Oromia Re   | Lower Tha    | 0 | 60  | N | Fail        |
| 590881 | M | Addis Abak  | Lower Tha    | 0 | 90  | N | Withdrawn   |
| 590914 | F | South Regi  | A Level or I | 0 | 60  | N | Fail        |
| 590961 | M | Afar Regio  | A Level or I | 0 | 90  | N | Withdrawn   |
| 590974 | M | Sidamo Re   | Lower Tha    | 0 | 60  | N | Withdrawn   |
| 591375 | M | Afar Regio  | A Level or I | 0 | 60  | N | Distinction |
| 591388 | M | South Regi  | HE Qualific  | 0 | 60  | N | Distinction |
| 591566 | M | Amhara Re   | Lower Tha    | 0 | 60  | N | Withdrawn   |
| 591619 | F | South Wes   | HE Qualific  | 0 | 60  | N | Withdrawn   |
| 591655 | M | North Regi  | Lower Tha    | 0 | 90  | N | Withdrawn   |
| 591719 | M | South Regi  | A Level or I | 0 | 60  | N | Withdrawn   |
| 591738 | M | South Wes   | A Level or I | 0 | 150 | N | Withdrawn   |
| 591958 | M | South Regi  | Lower Tha    | 0 | 60  | N | Distinction |
| 592007 | M | Amhara Re   | A Level or I | 0 | 120 | N | Fail        |
| 592051 | M | Afar Regio  | HE Qualific  | 0 | 120 | Y | Withdrawn   |
| 592093 | M | South Regi  | Lower Tha    | 0 | 90  | N | Withdrawn   |
| 592151 | M | South Regi  | Lower Tha    | 0 | 60  | N | Pass        |
| 592158 | F | Sidamo Re   | A Level or I | 0 | 120 | N | Withdrawn   |
| 592259 | M | Sidamo Re   | A Level or I | 0 | 150 | N | Withdrawn   |
| 592284 | F | Amhara Re   | A Level or I | 0 | 120 | Y | Withdrawn   |

|        |   |                           |   |     |   |             |
|--------|---|---------------------------|---|-----|---|-------------|
| 592407 | M | Somalia Re A Level or I   | 0 | 90  | N | Withdrawn   |
| 592429 | M | North Regi HE Qualific    | 0 | 60  | N | Fail        |
| 592437 | M | Addis Abak A Level or I   | 0 | 120 | N | Withdrawn   |
| 592609 | M | Afar Regioi A Level or I  | 0 | 60  | N | Withdrawn   |
| 592684 | M | Afar Regioi A Level or I  | 0 | 60  | N | Withdrawn   |
| 592775 | M | Sidamo Re HE Qualific     | 0 | 30  | N | Pass        |
| 592776 | M | Sidamo Re A Level or I    | 0 | 60  | N | Pass        |
| 592842 | M | Afar Regioi HE Qualific   | 0 | 120 | N | Fail        |
| 592876 | M | Afar Regioi HE Qualific   | 0 | 90  | N | Withdrawn   |
| 592939 | M | Afar Regioi HE Qualific   | 0 | 240 | N | Withdrawn   |
| 592961 | M | Amhara Re HE Qualific     | 0 | 60  | N | Distinction |
| 592976 | M | South Regi HE Qualific    | 0 | 60  | N | Distinction |
| 593071 | M | Afar Regioi A Level or I  | 0 | 90  | N | Withdrawn   |
| 593103 | M | Amhara Re A Level or I    | 0 | 120 | N | Pass        |
| 593123 | M | Tigrai Regio A Level or I | 0 | 60  | N | Fail        |
| 593305 | M | Tigrai Regio A Level or I | 0 | 60  | N | Pass        |
| 593787 | M | Sidamo Re Lower Than      | 0 | 60  | N | Fail        |
| 593823 | M | Addis Abak HE Qualific    | 0 | 90  | N | Distinction |
| 593972 | M | Amhara Re A Level or I    | 0 | 60  | N | Pass        |
| 593995 | M | Sidamo Re A Level or I    | 0 | 60  | N | Distinction |
| 594044 | M | Tigrai Regio HE Qualific  | 0 | 90  | N | Pass        |
| 594052 | M | Amhara Re A Level or I    | 0 | 90  | N | Withdrawn   |
| 594111 | M | Tigrai Regio A Level or I | 0 | 60  | N | Withdrawn   |
| 594157 | M | South Regi A Level or I   | 0 | 60  | N | Pass        |
| 594193 | M | South Wes Lower Than      | 0 | 60  | Y | Fail        |
| 594199 | M | Oromia Re A Level or I    | 0 | 90  | Y | Withdrawn   |
| 594246 | M | Afar Regioi HE Qualific   | 0 | 60  | N | Fail        |
| 594326 | M | South Regi A Level or I   | 0 | 120 | N | Withdrawn   |
| 594371 | M | North Regi Post Gradu     | 0 | 30  | N | Pass        |
| 594419 | F | Amhara Re Lower Than      | 0 | 90  | N | Withdrawn   |
| 594851 | M | Afar Regioi Lower Than    | 0 | 90  | N | Fail        |
| 595164 | M | Somalia Re A Level or I   | 0 | 120 | Y | Pass        |
| 595182 | M | Afar Regioi HE Qualific   | 0 | 90  | N | Pass        |
| 595189 | M | Afar Regioi A Level or I  | 0 | 60  | N | Distinction |
| 595324 | F | Afar Regioi A Level or I  | 0 | 120 | N | Fail        |
| 595356 | M | South Wes A Level or I    | 0 | 90  | N | Withdrawn   |
| 595492 | M | Oromia Re Lower Than      | 0 | 60  | N | Fail        |
| 595514 | M | Somalia Re A Level or I   | 0 | 60  | N | Withdrawn   |
| 595659 | M | Sidamo Re A Level or I    | 0 | 90  | N | Pass        |
| 595685 | M | Somalia Re A Level or I   | 0 | 120 | N | Withdrawn   |
| 595781 | F | North Regi A Level or I   | 0 | 60  | N | Fail        |
| 595797 | M | Sidamo Re A Level or I    | 0 | 60  | N | Pass        |
| 595847 | M | Tigrai Regio HE Qualific  | 0 | 120 | N | Pass        |
| 595986 | M | South Wes A Level or I    | 0 | 120 | N | Pass        |
| 595992 | M | Sidamo Re Lower Than      | 0 | 60  | N | Withdrawn   |
| 596029 | M | Sidamo Re Lower Than      | 0 | 120 | N | Withdrawn   |
| 596035 | M | Afar Regioi A Level or I  | 0 | 105 | N | Withdrawn   |

|        |   |                          |   |     |   |             |
|--------|---|--------------------------|---|-----|---|-------------|
| 596157 | M | Sidamo Re Lower Tha      | 0 | 240 | N | Pass        |
| 596321 | F | Amhara Re A Level or I   | 0 | 60  | N | Withdrawn   |
| 596432 | F | Oromia Re Lower Tha      | 0 | 60  | N | Withdrawn   |
| 596699 | M | Addis Abak HE Qualific   | 0 | 240 | N | Withdrawn   |
| 596731 | M | Sidamo Re A Level or I   | 0 | 90  | N | Pass        |
| 596903 | F | Sidamo Re Lower Tha      | 0 | 120 | N | Pass        |
| 596947 | M | Addis Abak Lower Tha     | 0 | 90  | N | Fail        |
| 597181 | M | South Regi A Level or I  | 0 | 60  | N | Fail        |
| 597363 | M | Oromia Re Lower Tha      | 0 | 60  | N | Withdrawn   |
| 597403 | M | Amhara Re A Level or I   | 0 | 90  | N | Pass        |
| 597560 | M | Somalia Re Lower Tha     | 0 | 120 | N | Withdrawn   |
| 597817 | F | Addis Abak A Level or I  | 0 | 120 | N | Fail        |
| 597926 | F | South Regi A Level or I  | 0 | 240 | N | Distinction |
| 598074 | M | Afar Regioi A Level or I | 0 | 90  | N | Withdrawn   |
| 598113 | M | South Wes HE Qualific    | 0 | 120 | N | Pass        |
| 598321 | M | South Regi HE Qualific   | 0 | 60  | N | Pass        |
| 598662 | F | Afar Regioi A Level or I | 0 | 60  | N | Pass        |
| 598666 | M | Sidamo Re No Formal      | 0 | 120 | N | Withdrawn   |
| 598757 | M | South Regi A Level or I  | 0 | 90  | N | Withdrawn   |
| 598860 | F | Sidamo Re Lower Tha      | 0 | 90  | N | Distinction |
| 598924 | M | North Regi A Level or I  | 0 | 60  | N | Fail        |
| 599263 | M | Sidamo Re A Level or I   | 0 | 120 | N | Fail        |
| 599275 | M | Afar Regioi A Level or I | 0 | 90  | N | Fail        |
| 599341 | M | Afar Regioi A Level or I | 0 | 90  | N | Withdrawn   |
| 599542 | M | Afar Regioi Lower Tha    | 0 | 90  | N | Fail        |
| 599547 | M | Somalia Re A Level or I  | 0 | 120 | Y | Withdrawn   |
| 599615 | M | Somalia Re Lower Tha     | 0 | 90  | Y | Fail        |
| 599857 | M | Afar Regioi Lower Tha    | 0 | 90  | N | Pass        |
| 599893 | M | South Regi A Level or I  | 0 | 60  | N | Fail        |
| 599902 | M | South Regi Lower Tha     | 0 | 60  | N | Withdrawn   |
| 599937 | F | Tigrai Regi Lower Tha    | 0 | 90  | N | Withdrawn   |
| 599942 | M | Tigrai Regi A Level or I | 0 | 60  | N | Withdrawn   |
| 599958 | F | Oromia Re HE Qualific    | 0 | 150 | N | Pass        |
| 599986 | M | Somalia Re Lower Tha     | 0 | 60  | N | Withdrawn   |
| 600073 | M | South Wes A Level or I   | 0 | 60  | N | Pass        |
| 600094 | M | Amhara Re A Level or I   | 0 | 90  | N | Withdrawn   |
| 600142 | M | Tigrai Regi A Level or I | 0 | 60  | N | Fail        |
| 600181 | M | Somalia Re HE Qualific   | 0 | 60  | N | Withdrawn   |
| 600335 | M | Sidamo Re A Level or I   | 0 | 60  | N | Pass        |
| 600436 | F | South Regi HE Qualific   | 0 | 120 | Y | Withdrawn   |
| 600509 | M | Amhara Re A Level or I   | 0 | 60  | N | Withdrawn   |
| 600547 | M | Amhara Re A Level or I   | 0 | 60  | N | Withdrawn   |
| 600632 | M | South Regi Lower Tha     | 0 | 180 | N | Distinction |
| 600814 | M | South Wes Lower Tha      | 0 | 180 | N | Withdrawn   |
| 600859 | M | Afar Regioi HE Qualific  | 0 | 90  | N | Withdrawn   |
| 600879 | M | South Regi A Level or I  | 0 | 90  | N | Withdrawn   |
| 600938 | M | Afar Regioi HE Qualific  | 0 | 90  | N | Withdrawn   |



|        |   |                |             |   |     |   |             |
|--------|---|----------------|-------------|---|-----|---|-------------|
| 600945 | M | Afar Region    | A Level or  | 0 | 60  | N | Pass        |
| 600975 | F | Addis Ababa    | Lower Than  | 0 | 90  | N | Withdrawn   |
| 600987 | M | Amhara Region  | A Level or  | 0 | 60  | N | Pass        |
| 601021 | M | South West     | HE Qualific | 0 | 90  | N | Withdrawn   |
| 601175 | M | South West     | A Level or  | 0 | 60  | N | Withdrawn   |
| 601224 | M | Afar Region    | HE Qualific | 0 | 90  | N | Pass        |
| 601550 | F | South Region   | A Level or  | 0 | 30  | N | Pass        |
| 601731 | M | Sidamo Region  | A Level or  | 0 | 210 | N | Fail        |
| 601757 | M | Afar Region    | HE Qualific | 0 | 90  | N | Withdrawn   |
| 601872 | M | Addis Ababa    | A Level or  | 0 | 60  | N | Pass        |
| 601949 | M | Afar Region    | HE Qualific | 0 | 30  | N | Pass        |
| 602030 | M | Afar Region    | Lower Than  | 0 | 60  | N | Withdrawn   |
| 602042 | M | North Region   | Post Gradu  | 0 | 30  | N | Distinction |
| 602107 | M | Sidamo Region  | HE Qualific | 0 | 60  | N | Fail        |
| 602133 | M | South West     | A Level or  | 0 | 60  | N | Pass        |
| 602150 | M | Sidamo Region  | A Level or  | 0 | 90  | N | Withdrawn   |
| 602269 | M | Sidamo Region  | HE Qualific | 0 | 60  | N | Fail        |
| 602398 | M | South Region   | A Level or  | 0 | 60  | N | Fail        |
| 602585 | M | Afar Region    | A Level or  | 0 | 90  | N | Withdrawn   |
| 602703 | M | Oromia Region  | A Level or  | 0 | 60  | N | Withdrawn   |
| 602718 | M | Afar Region    | Post Gradu  | 0 | 60  | N | Fail        |
| 602891 | F | Addis Ababa    | A Level or  | 0 | 210 | Y | Withdrawn   |
| 602902 | F | Sidamo Region  | Lower Than  | 0 | 90  | N | Pass        |
| 602913 | F | Sidamo Region  | A Level or  | 0 | 90  | N | Pass        |
| 603053 | M | Afar Region    | A Level or  | 0 | 90  | N | Fail        |
| 603222 | M | South Region   | Lower Than  | 0 | 60  | N | Fail        |
| 603239 | M | Tigray Region  | Lower Than  | 0 | 60  | N | Fail        |
| 603477 | M | Addis Ababa    | HE Qualific | 0 | 60  | N | Pass        |
| 603498 | M | Sidamo Region  | A Level or  | 0 | 90  | N | Fail        |
| 603639 | M | Amhara Region  | A Level or  | 0 | 60  | N | Withdrawn   |
| 603791 | M | Afar Region    | Lower Than  | 0 | 120 | N | Fail        |
| 603832 | M | South West     | A Level or  | 0 | 60  | N | Withdrawn   |
| 603859 | M | South Region   | HE Qualific | 0 | 60  | N | Pass        |
| 603999 | M | Amhara Region  | A Level or  | 0 | 60  | N | Withdrawn   |
| 604078 | M | South West     | A Level or  | 0 | 60  | N | Withdrawn   |
| 604164 | M | South Region   | A Level or  | 0 | 60  | N | Withdrawn   |
| 604480 | M | South Region   | A Level or  | 0 | 120 | N | Withdrawn   |
| 604517 | M | Afar Region    | Lower Than  | 0 | 60  | N | Pass        |
| 604559 | M | Sidamo Region  | A Level or  | 0 | 90  | N | Withdrawn   |
| 604571 | M | Somalia Region | Lower Than  | 0 | 120 | N | Pass        |
| 604643 | M | South Region   | Lower Than  | 0 | 90  | N | Withdrawn   |
| 604655 | M | Tigray Region  | A Level or  | 0 | 90  | Y | Fail        |
| 604665 | M | Sidamo Region  | HE Qualific | 0 | 120 | N | Withdrawn   |
| 604723 | M | South Region   | A Level or  | 0 | 90  | N | Pass        |
| 604906 | M | South Region   | Lower Than  | 0 | 60  | N | Withdrawn   |
| 604997 | F | Afar Region    | HE Qualific | 0 | 60  | N | Pass        |
| 605130 | M | Afar Region    | HE Qualific | 0 | 75  | N | Withdrawn   |

|        |   |                          |   |     |   |             |
|--------|---|--------------------------|---|-----|---|-------------|
| 605144 | M | Afar Region HE Qualific  | 0 | 90  | N | Pass        |
| 605180 | M | North Regi A Level or I  | 0 | 60  | N | Withdrawn   |
| 605266 | F | Sidamo Re A Level or I   | 0 | 90  | N | Pass        |
| 605571 | F | Afar Region HE Qualific  | 0 | 90  | N | Pass        |
| 605688 | M | South Regi A Level or I  | 0 | 60  | N | Distinction |
| 605703 | M | Sidamo Re A Level or I   | 0 | 90  | N | Distinction |
| 605926 | M | Addis Abat A Level or I  | 0 | 60  | N | Withdrawn   |
| 606025 | M | Amhara Re Lower Than     | 0 | 60  | N | Withdrawn   |
| 606127 | M | Sidamo Re A Level or I   | 0 | 60  | N | Withdrawn   |
| 606205 | F | Somalia Re A Level or I  | 0 | 90  | N | Withdrawn   |
| 606206 | M | Afar Region A Level or I | 0 | 60  | N | Fail        |
| 606282 | F | Addis Abat A Level or I  | 0 | 60  | Y | Pass        |
| 606300 | F | Somalia Re A Level or I  | 0 | 90  | N | Withdrawn   |
| 606350 | M | Addis Abat A Level or I  | 0 | 150 | N | Fail        |
| 606417 | M | South Regi A Level or I  | 0 | 60  | Y | Withdrawn   |
| 606444 | F | Amhara Re Lower Than     | 0 | 90  | N | Distinction |
| 606663 | M | South Wes A Level or I   | 0 | 60  | N | Withdrawn   |
| 606665 | M | Amhara Re A Level or I   | 0 | 90  | N | Fail        |
| 606724 | M | Addis Abat A Level or I  | 0 | 60  | N | Pass        |
| 606828 | M | South Regi Lower Than    | 0 | 60  | N | Fail        |
| 606930 | M | South Regi Lower Than    | 0 | 90  | N | Withdrawn   |
| 607052 | M | Somalia Re A Level or I  | 0 | 90  | N | Pass        |
| 607060 | F | South Regi A Level or I  | 0 | 60  | N | Withdrawn   |
| 607061 | M | Afar Region A Level or I | 0 | 90  | N | Distinction |
| 607063 | F | North Regi A Level or I  | 0 | 90  | N | Withdrawn   |
| 607411 | F | Sidamo Re A Level or I   | 0 | 180 | Y | Withdrawn   |
| 607413 | M | Addis Abat HE Qualific   | 0 | 60  | N | Withdrawn   |
| 607442 | M | North Regi Lower Than    | 0 | 60  | N | Withdrawn   |
| 607453 | M | Oromia Re HE Qualific    | 0 | 240 | N | Withdrawn   |
| 607609 | M | Sidamo Re Lower Than     | 0 | 90  | N | Withdrawn   |
| 607636 | M | Tigrai Regi A Level or I | 0 | 60  | N | Pass        |
| 607703 | M | Afar Region Lower Than   | 0 | 60  | N | Withdrawn   |
| 607835 | M | South Regi A Level or I  | 0 | 60  | N | Distinction |
| 607896 | M | Sidamo Re A Level or I   | 0 | 150 | Y | Withdrawn   |
| 607927 | F | Amhara Re Lower Than     | 0 | 150 | N | Fail        |
| 607966 | F | North Regi A Level or I  | 0 | 90  | N | Withdrawn   |
| 608130 | M | South Wes Lower Than     | 0 | 60  | N | Withdrawn   |
| 608152 | F | Afar Region HE Qualific  | 0 | 60  | N | Fail        |
| 608243 | M | South Regi A Level or I  | 0 | 60  | N | Pass        |
| 608464 | M | Amhara Re Lower Than     | 0 | 60  | N | Pass        |
| 608472 | M | Amhara Re Lower Than     | 0 | 60  | N | Fail        |
| 608504 | M | Amhara Re A Level or I   | 0 | 60  | N | Withdrawn   |
| 608549 | F | Amhara Re A Level or I   | 0 | 120 | Y | Withdrawn   |
| 608577 | M | North Regi HE Qualific   | 0 | 60  | N | Withdrawn   |
| 608643 | M | North Regi HE Qualific   | 0 | 120 | N | Withdrawn   |
| 608735 | F | South Regi HE Qualific   | 0 | 30  | N | Pass        |
| 608750 | M | Sidamo Re A Level or I   | 0 | 150 | N | Withdrawn   |

|        |   |                          |   |     |   |             |
|--------|---|--------------------------|---|-----|---|-------------|
| 608753 | M | Somalia Re A Level or I  | 0 | 120 | N | Fail        |
| 608904 | M | North Regi Post Gradu    | 0 | 90  | N | Distinction |
| 608923 | M | Addis Abak Lower Thar    | 0 | 120 | N | Withdrawn   |
| 609025 | M | Sidamo Re Lower Thar     | 0 | 60  | N | Withdrawn   |
| 609045 | M | Tigrai Regi HE Qualific  | 0 | 60  | N | Pass        |
| 609192 | M | Afar Regi Lower Thar     | 0 | 60  | N | Withdrawn   |
| 609229 | M | South Wes A Level or I   | 0 | 120 | N | Distinction |
| 609241 | F | South Regi HE Qualific   | 0 | 120 | N | Withdrawn   |
| 609383 | M | South Regi Lower Thar    | 0 | 60  | N | Withdrawn   |
| 609450 | M | Afar Regi HE Qualific    | 0 | 60  | N | Withdrawn   |
| 609489 | M | Amhara Re HE Qualific    | 0 | 60  | N | Withdrawn   |
| 609515 | M | Afar Regi A Level or I   | 0 | 60  | N | Pass        |
| 609602 | M | South Regi A Level or I  | 0 | 90  | N | Distinction |
| 609605 | M | Tigrai Regi HE Qualific  | 0 | 120 | N | Withdrawn   |
| 609645 | M | South Regi A Level or I  | 0 | 120 | N | Fail        |
| 609828 | F | South Wes A Level or I   | 0 | 60  | N | Withdrawn   |
| 610099 | M | South Regi A Level or I  | 0 | 120 | N | Pass        |
| 610158 | M | Addis Abak Lower Thar    | 0 | 60  | N | Withdrawn   |
| 610234 | M | Afar Regi HE Qualific    | 0 | 90  | N | Withdrawn   |
| 610287 | M | Addis Abak HE Qualific   | 0 | 60  | N | Withdrawn   |
| 610391 | M | South Regi Lower Thar    | 0 | 60  | N | Fail        |
| 610575 | M | South Regi HE Qualific   | 0 | 60  | N | Pass        |
| 610577 | M | North Regi Lower Thar    | 0 | 90  | N | Fail        |
| 610718 | M | North Regi Lower Thar    | 0 | 60  | N | Fail        |
| 610831 | M | Addis Abak Lower Thar    | 0 | 120 | N | Withdrawn   |
| 611062 | M | South Wes A Level or I   | 0 | 60  | N | Fail        |
| 611176 | M | South Wes Lower Thar     | 0 | 60  | N | Distinction |
| 611260 | M | South Regi A Level or I  | 0 | 30  | N | Pass        |
| 611402 | M | South Regi HE Qualific   | 0 | 60  | N | Pass        |
| 611750 | M | Afar Regi A Level or I   | 0 | 120 | N | Withdrawn   |
| 611865 | M | Sidamo Re A Level or I   | 0 | 90  | N | Withdrawn   |
| 612023 | M | South Regi Lower Thar    | 0 | 60  | N | Fail        |
| 612119 | M | Amhara Re A Level or I   | 0 | 60  | N | Pass        |
| 612124 | M | Oromia Re A Level or I   | 0 | 60  | N | Withdrawn   |
| 612287 | M | Tigrai Regi Lower Thar   | 0 | 60  | N | Withdrawn   |
| 612381 | F | Addis Abak HE Qualific   | 0 | 60  | N | Withdrawn   |
| 612397 | M | Oromia Re Lower Thar     | 0 | 60  | N | Withdrawn   |
| 612644 | M | South Wes A Level or I   | 0 | 60  | N | Pass        |
| 612673 | M | Tigrai Regi A Level or I | 0 | 60  | N | Fail        |
| 612805 | M | Oromia Re HE Qualific    | 0 | 90  | N | Withdrawn   |
| 612814 | M | Sidamo Re A Level or I   | 0 | 60  | N | Distinction |
| 612822 | M | Amhara Re Lower Thar     | 0 | 90  | N | Withdrawn   |
| 612860 | M | South Regi A Level or I  | 0 | 60  | N | Withdrawn   |
| 612882 | M | Addis Abak HE Qualific   | 0 | 60  | N | Fail        |
| 613116 | F | South Regi Lower Thar    | 0 | 60  | N | Fail        |
| 613120 | M | Sidamo Re A Level or I   | 0 | 120 | N | Withdrawn   |
| 613133 | M | North Regi Post Gradu    | 0 | 60  | N | Distinction |

|        |   |                         |   |     |   |             |
|--------|---|-------------------------|---|-----|---|-------------|
| 613280 | F | Sidamo Re HE Qualific   | 0 | 120 | N | Withdrawn   |
| 613310 | M | South Wes A Level or I  | 0 | 60  | N | Fail        |
| 613387 | M | North Regi HE Qualific  | 0 | 60  | N | Fail        |
| 613390 | F | Addis Abak A Level or I | 0 | 30  | N | Withdrawn   |
| 613417 | M | Tigrai Regi Lower Tha   | 0 | 90  | N | Fail        |
| 613441 | M | Addis Abak A Level or I | 0 | 120 | N | Withdrawn   |
| 613447 | M | Somalia Re Lower Tha    | 0 | 120 | Y | Withdrawn   |
| 613461 | M | Afar Regio Lower Tha    | 0 | 90  | N | Fail        |
| 613501 | M | Addis Abak Lower Tha    | 0 | 60  | N | Pass        |
| 613873 | M | Oromia Re Lower Tha     | 0 | 90  | N | Withdrawn   |
| 614059 | M | South Regi HE Qualific  | 0 | 90  | Y | Pass        |
| 614263 | F | Sidamo Re Lower Tha     | 0 | 60  | N | Fail        |
| 614265 | M | South Regi Lower Tha    | 0 | 120 | Y | Withdrawn   |
| 614345 | F | Amhara Re Lower Tha     | 0 | 60  | N | Withdrawn   |
| 614477 | F | South Regi A Level or I | 0 | 60  | N | Fail        |
| 614733 | M | Sidamo Re No Formal     | 0 | 120 | N | Withdrawn   |
| 614804 | M | Afar Regio A Level or I | 0 | 90  | Y | Withdrawn   |
| 614844 | F | Addis Abak A Level or I | 0 | 90  | N | Distinction |
| 614952 | M | Sidamo Re Lower Tha     | 0 | 60  | N | Withdrawn   |
| 615031 | F | Oromia Re Lower Tha     | 0 | 60  | N | Pass        |
| 615229 | M | Sidamo Re A Level or I  | 0 | 60  | Y | Pass        |
| 615246 | M | Addis Abak Lower Tha    | 0 | 60  | N | Fail        |
| 615249 | F | Addis Abak A Level or I | 0 | 180 | N | Pass        |
| 615321 | F | South Regi HE Qualific  | 0 | 60  | N | Withdrawn   |
| 615407 | M | Afar Regio HE Qualific  | 0 | 30  | N | Fail        |
| 615437 | M | Addis Abak HE Qualific  | 0 | 30  | N | Pass        |
| 616333 | M | Amhara Re A Level or I  | 0 | 60  | Y | Fail        |
| 616334 | M | North Regi Lower Tha    | 0 | 90  | N | Fail        |
| 616407 | M | Tigrai Regi Lower Tha   | 0 | 60  | N | Withdrawn   |
| 616439 | M | Addis Abak A Level or I | 0 | 60  | N | Withdrawn   |
| 616831 | M | Amhara Re Lower Tha     | 0 | 60  | N | Pass        |
| 617186 | F | Sidamo Re Lower Tha     | 0 | 60  | N | Fail        |
| 617307 | F | Addis Abak Lower Tha    | 0 | 120 | N | Withdrawn   |
| 617331 | M | South Regi A Level or I | 0 | 60  | N | Fail        |
| 617348 | F | South Regi A Level or I | 0 | 30  | N | Pass        |
| 617355 | F | South Regi Lower Tha    | 0 | 60  | N | Pass        |
| 617365 | M | Afar Regio Lower Tha    | 0 | 60  | N | Pass        |
| 617416 | M | Afar Regio Lower Tha    | 0 | 30  | N | Pass        |
| 617781 | M | North Regi HE Qualific  | 0 | 90  | N | Pass        |
| 617898 | M | North Regi Lower Tha    | 0 | 60  | N | Withdrawn   |
| 617925 | F | Addis Abak Lower Tha    | 0 | 90  | N | Withdrawn   |
| 617942 | M | Afar Regio HE Qualific  | 0 | 30  | N | Withdrawn   |
| 618002 | F | Afar Regio HE Qualific  | 0 | 60  | N | Fail        |
| 618078 | M | Somalia Re A Level or I | 0 | 60  | N | Withdrawn   |
| 618096 | M | South Wes A Level or I  | 0 | 60  | N | Distinction |
| 618129 | M | South Regi Lower Tha    | 0 | 30  | N | Pass        |
| 618171 | M | Somalia Re Lower Tha    | 0 | 90  | N | Withdrawn   |

|        |   |                          |   |     |   |             |
|--------|---|--------------------------|---|-----|---|-------------|
| 618279 | M | Amhara Re Lower Tha      | 0 | 90  | N | Withdrawn   |
| 618514 | M | South Regi A Level or I  | 0 | 60  | N | Withdrawn   |
| 618571 | M | North Regi A Level or I  | 0 | 60  | N | Pass        |
| 618590 | M | South Regi A Level or I  | 0 | 90  | Y | Withdrawn   |
| 618606 | M | Somalia Re A Level or I  | 0 | 60  | N | Withdrawn   |
| 618619 | M | Somalia Re Lower Tha     | 0 | 60  | N | Withdrawn   |
| 618649 | F | South Wes A Level or I   | 0 | 90  | Y | Withdrawn   |
| 618665 | M | South Regi Lower Tha     | 0 | 90  | N | Fail        |
| 618679 | M | South Regi Lower Tha     | 0 | 60  | N | Withdrawn   |
| 618744 | M | Oromia Re Lower Tha      | 0 | 90  | Y | Withdrawn   |
| 618824 | F | Tigrai Regi Lower Tha    | 0 | 60  | N | Pass        |
| 618861 | M | South Regi Lower Tha     | 0 | 30  | N | Withdrawn   |
| 619006 | M | Amhara Re A Level or I   | 0 | 60  | N | Withdrawn   |
| 619014 | M | Sidamo Re A Level or I   | 0 | 60  | N | Pass        |
| 619303 | M | South Regi A Level or I  | 0 | 60  | N | Pass        |
| 619447 | M | Sidamo Re A Level or I   | 0 | 60  | N | Distinction |
| 619524 | F | Afar Regioi A Level or I | 0 | 60  | N | Withdrawn   |
| 619870 | M | South Regi A Level or I  | 0 | 60  | N | Distinction |
| 620148 | M | Tigrai Regi A Level or I | 0 | 30  | N | Fail        |
| 620215 | M | Amhara Re A Level or I   | 0 | 60  | Y | Withdrawn   |
| 620243 | M | South Wes Lower Tha      | 0 | 90  | N | Withdrawn   |
| 620266 | M | Afar Regioi A Level or I | 0 | 60  | N | Fail        |
| 620320 | M | Amhara Re Lower Tha      | 0 | 120 | Y | Withdrawn   |
| 620356 | M | North Regi A Level or I  | 0 | 90  | N | Withdrawn   |
| 620368 | F | Afar Regioi Post Gradu   | 0 | 60  | N | Distinction |
| 620369 | M | Tigrai Regi A Level or I | 0 | 75  | N | Withdrawn   |
| 620376 | M | South Regi Lower Tha     | 0 | 60  | N | Withdrawn   |
| 620440 | M | Amhara Re Lower Tha      | 0 | 60  | N | Fail        |
| 620485 | F | Afar Regioi HE Qualific  | 0 | 60  | N | Withdrawn   |
| 620646 | M | South Regi Lower Tha     | 0 | 60  | N | Fail        |
| 620713 | M | South Wes Lower Tha      | 0 | 120 | Y | Withdrawn   |
| 620876 | M | South Regi A Level or I  | 0 | 60  | N | Fail        |
| 620897 | M | Sidamo Re A Level or I   | 0 | 60  | N | Withdrawn   |
| 620918 | M | Sidamo Re A Level or I   | 0 | 60  | N | Withdrawn   |
| 620935 | M | Amhara Re A Level or I   | 0 | 60  | N | Withdrawn   |
| 620974 | F | South Wes A Level or I   | 0 | 90  | Y | Withdrawn   |
| 620977 | M | South Wes A Level or I   | 0 | 60  | N | Withdrawn   |
| 621300 | M | Sidamo Re A Level or I   | 0 | 90  | N | Withdrawn   |
| 621401 | M | Sidamo Re A Level or I   | 0 | 60  | N | Fail        |
| 621619 | M | Addis Abak Lower Tha     | 0 | 60  | Y | Withdrawn   |
| 621655 | M | Amhara Re Lower Tha      | 0 | 60  | N | Withdrawn   |
| 621656 | M | Sidamo Re A Level or I   | 0 | 60  | N | Pass        |
| 621696 | M | Sidamo Re A Level or I   | 0 | 90  | N | Withdrawn   |
| 621807 | M | Amhara Re Lower Tha      | 0 | 90  | N | Withdrawn   |
| 622015 | M | Afar Regioi Lower Tha    | 0 | 60  | N | Withdrawn   |
| 622130 | F | Sidamo Re A Level or I   | 0 | 120 | N | Withdrawn   |
| 622215 | F | South Regi A Level or I  | 0 | 90  | N | Fail        |

|        |   |                         |   |     |   |             |
|--------|---|-------------------------|---|-----|---|-------------|
| 622302 | M | North Regi Post Gradu   | 0 | 30  | N | Distinction |
| 622368 | M | South Regi Lower Thar   | 0 | 60  | Y | Pass        |
| 622386 | M | South Wes HE Qualific   | 0 | 60  | N | Fail        |
| 622398 | M | Amhara Re HE Qualific   | 0 | 60  | N | Withdrawn   |
| 622430 | M | Sidamo Re Lower Thar    | 0 | 120 | N | Withdrawn   |
| 622652 | M | Afar Regio HE Qualific  | 0 | 90  | N | Distinction |
| 622753 | F | South Wes A Level or I  | 0 | 60  | N | Fail        |
| 622773 | F | Oromia Re A Level or I  | 0 | 120 | N | Pass        |
| 622787 | M | Sidamo Re Post Gradu    | 0 | 30  | N | Fail        |
| 622804 | M | Somalia Re A Level or I | 0 | 30  | N | Withdrawn   |
| 622897 | M | Sidamo Re A Level or I  | 0 | 90  | N | Withdrawn   |
| 622948 | M | North Regi A Level or I | 0 | 60  | N | Withdrawn   |
| 623052 | F | Sidamo Re A Level or I  | 0 | 90  | N | Pass        |
| 623190 | M | South Wes A Level or I  | 0 | 60  | N | Withdrawn   |
| 623250 | M | Addis Abat A Level or I | 0 | 60  | N | Pass        |
| 623290 | F | Sidamo Re Lower Thar    | 0 | 60  | N | Pass        |
| 623347 | M | South Wes Post Gradu    | 0 | 90  | N | Distinction |
| 623421 | M | Somalia Re A Level or I | 0 | 60  | N | Pass        |
| 623456 | M | Addis Abat A Level or I | 0 | 90  | N | Fail        |
| 623511 | M | South Regi HE Qualific  | 0 | 30  | N | Withdrawn   |
| 623562 | M | South Regi A Level or I | 0 | 60  | Y | Pass        |
| 623605 | M | South Regi A Level or I | 0 | 60  | N | Fail        |
| 623609 | M | Amhara Re Lower Thar    | 0 | 60  | N | Fail        |
| 623619 | F | Somalia Re Lower Thar   | 0 | 90  | N | Withdrawn   |
| 623667 | M | Oromia Re A Level or I  | 0 | 60  | N | Pass        |
| 623707 | F | Somalia Re Lower Thar   | 0 | 30  | N | Withdrawn   |
| 623732 | M | Sidamo Re A Level or I  | 0 | 60  | N | Pass        |
| 623738 | M | Sidamo Re A Level or I  | 0 | 90  | N | Withdrawn   |
| 623780 | M | Afar Regio Lower Thar   | 0 | 60  | N | Fail        |
| 623786 | M | Sidamo Re A Level or I  | 0 | 90  | N | Withdrawn   |
| 623797 | F | North Regi Lower Thar   | 0 | 60  | N | Pass        |
| 624039 | M | South Regi A Level or I | 0 | 60  | N | Fail        |
| 624060 | F | North Regi Post Gradu   | 0 | 30  | N | Withdrawn   |
| 624126 | M | South Regi Lower Thar   | 0 | 60  | N | Withdrawn   |
| 624127 | F | Sidamo Re A Level or I  | 0 | 60  | N | Pass        |
| 624134 | M | Amhara Re Lower Thar    | 0 | 60  | N | Fail        |
| 624164 | M | Sidamo Re A Level or I  | 0 | 90  | N | Pass        |
| 624354 | F | South Wes A Level or I  | 0 | 120 | N | Withdrawn   |
| 624441 | M | South Regi A Level or I | 0 | 60  | N | Pass        |
| 624445 | F | Sidamo Re HE Qualific   | 0 | 60  | N | Distinction |
| 624483 | M | South Wes HE Qualific   | 0 | 30  | N | Distinction |
| 624591 | M | Sidamo Re HE Qualific   | 0 | 120 | N | Fail        |
| 624593 | M | Somalia Re Lower Thar   | 0 | 60  | N | Withdrawn   |
| 624765 | M | Sidamo Re HE Qualific   | 0 | 60  | N | Withdrawn   |
| 624782 | F | Addis Abat Lower Thar   | 0 | 60  | N | Fail        |
| 624810 | M | Afar Regio HE Qualific  | 0 | 60  | N | Pass        |
| 624875 | M | Oromia Re A Level or I  | 0 | 30  | Y | Distinction |

|        |   |                          |   |     |   |             |
|--------|---|--------------------------|---|-----|---|-------------|
| 624970 | F | Afar Region HE Qualific  | 0 | 120 | N | Pass        |
| 625014 | F | Oromia Re A Level or I   | 0 | 60  | N | Distinction |
| 625028 | M | South Regi HE Qualific   | 0 | 60  | N | Distinction |
| 625077 | M | Afar Region A Level or I | 0 | 30  | N | Pass        |
| 625078 | F | Tigray Regi HE Qualific  | 0 | 180 | N | Withdrawn   |
| 625108 | F | Addis Abak HE Qualific   | 0 | 60  | N | Distinction |
| 625121 | M | Oromia Re Lower Than     | 0 | 60  | N | Withdrawn   |
| 625128 | F | Amhara Re Lower Than     | 0 | 60  | Y | Fail        |
| 625207 | M | South Regi HE Qualific   | 0 | 60  | N | Withdrawn   |
| 625213 | M | Sidamo Re Lower Than     | 0 | 60  | N | Withdrawn   |
| 625267 | F | Amhara Re A Level or I   | 0 | 120 | N | Withdrawn   |
| 625330 | M | Afar Region A Level or I | 0 | 60  | N | Distinction |
| 625423 | M | Afar Region Lower Than   | 0 | 60  | N | Withdrawn   |
| 625453 | M | North Regi Post Gradu    | 0 | 30  | N | Pass        |
| 625476 | M | Amhara Re Lower Than     | 0 | 60  | N | Withdrawn   |
| 625517 | M | Addis Abak A Level or I  | 0 | 60  | N | Withdrawn   |
| 625527 | M | North Regi A Level or I  | 0 | 60  | N | Withdrawn   |
| 625552 | M | Amhara Re A Level or I   | 0 | 60  | N | Pass        |
| 625568 | M | South Regi A Level or I  | 0 | 90  | N | Withdrawn   |
| 625574 | F | South Regi A Level or I  | 0 | 60  | N | Distinction |
| 625614 | M | North Regi Lower Than    | 0 | 60  | N | Withdrawn   |
| 625684 | M | Addis Abak A Level or I  | 0 | 60  | N | Fail        |
| 625714 | M | Addis Abak HE Qualific   | 0 | 90  | N | Fail        |
| 625740 | M | Amhara Re HE Qualific    | 0 | 60  | N | Fail        |
| 625745 | M | South Wes A Level or I   | 0 | 60  | N | Pass        |
| 625774 | M | Afar Region Lower Than   | 0 | 60  | N | Withdrawn   |
| 625782 | M | Sidamo Re A Level or I   | 0 | 60  | N | Pass        |
| 625785 | M | Afar Region A Level or I | 0 | 90  | N | Withdrawn   |
| 625790 | M | South Regi Lower Than    | 0 | 60  | N | Withdrawn   |
| 625793 | M | South Wes A Level or I   | 0 | 90  | N | Withdrawn   |
| 625822 | M | Afar Region Post Gradu   | 0 | 60  | N | Distinction |
| 625838 | M | Addis Abak A Level or I  | 0 | 30  | N | Pass        |
| 625841 | M | Amhara Re A Level or I   | 0 | 60  | N | Fail        |
| 625884 | M | South Wes A Level or I   | 0 | 60  | N | Withdrawn   |
| 625950 | M | Somalia Re Lower Than    | 0 | 60  | N | Withdrawn   |
| 625953 | M | Sidamo Re HE Qualific    | 0 | 90  | N | Withdrawn   |
| 625975 | M | South Regi A Level or I  | 0 | 60  | Y | Fail        |
| 626055 | F | Afar Region HE Qualific  | 0 | 90  | N | Fail        |
| 626173 | F | Addis Abak Lower Than    | 0 | 60  | N | Withdrawn   |
| 626183 | M | Addis Abak Lower Than    | 0 | 60  | N | Fail        |
| 626252 | F | Oromia Re A Level or I   | 0 | 60  | N | Distinction |
| 626296 | M | South Regi Lower Than    | 0 | 90  | N | Withdrawn   |
| 626349 | M | Afar Region A Level or I | 0 | 90  | N | Withdrawn   |
| 626417 | M | Tigray Regi Lower Than   | 0 | 90  | N | Withdrawn   |
| 626438 | M | Amhara Re A Level or I   | 0 | 60  | N | Withdrawn   |
| 626444 | M | Sidamo Re A Level or I   | 0 | 60  | N | Withdrawn   |
| 626469 | M | South Regi Lower Than    | 0 | 120 | N | Withdrawn   |

|        |   |                          |   |     |   |             |
|--------|---|--------------------------|---|-----|---|-------------|
| 626501 | M | Addis Abat HE Qualific   | 0 | 30  | N | Pass        |
| 626516 | M | Somalia Re Lower Than    | 0 | 60  | N | Fail        |
| 626518 | M | Tigrai Regi A Level or I | 0 | 60  | N | Withdrawn   |
| 626614 | M | Afar Regi HE Qualific    | 0 | 30  | N | Fail        |
| 626625 | M | Afar Regi A Level or I   | 0 | 90  | N | Withdrawn   |
| 626712 | M | North Regi HE Qualific   | 0 | 30  | N | Withdrawn   |
| 626714 | M | South Regi A Level or I  | 0 | 60  | N | Fail        |
| 626763 | M | South Regi A Level or I  | 0 | 60  | N | Pass        |
| 626772 | M | Sidamo Re Lower Than     | 0 | 60  | N | Withdrawn   |
| 626857 | F | Addis Abak A Level or I  | 0 | 60  | N | Fail        |
| 626862 | M | Addis Abak HE Qualific   | 0 | 60  | N | Distinction |
| 626877 | M | South Regi A Level or I  | 0 | 60  | N | Fail        |
| 626906 | M | South Regi Lower Than    | 0 | 60  | N | Fail        |
| 626930 | M | Tigrai Regi Lower Than   | 0 | 90  | N | Withdrawn   |
| 626998 | M | Sidamo Re HE Qualific    | 0 | 60  | N | Pass        |
| 627066 | M | Afar Regi A Level or I   | 0 | 30  | N | Fail        |
| 627136 | M | Somalia Re A Level or I  | 0 | 60  | N | Distinction |
| 627160 | F | Sidamo Re Lower Than     | 0 | 120 | N | Withdrawn   |
| 627168 | M | Addis Abak Lower Than    | 0 | 60  | N | Withdrawn   |
| 627176 | F | Sidamo Re Lower Than     | 0 | 90  | N | Withdrawn   |
| 627253 | M | Sidamo Re A Level or I   | 0 | 60  | N | Distinction |
| 627307 | M | South Wes HE Qualific    | 0 | 90  | N | Withdrawn   |
| 627343 | F | South Wes Lower Than     | 0 | 60  | N | Pass        |
| 627348 | M | Amhara Re A Level or I   | 0 | 60  | N | Pass        |
| 627374 | M | South Regi Lower Than    | 0 | 60  | N | Pass        |
| 627386 | M | Afar Regi A Level or I   | 0 | 30  | N | Fail        |
| 627387 | M | South Regi HE Qualific   | 0 | 60  | N | Pass        |
| 627395 | M | Amhara Re HE Qualific    | 0 | 120 | N | Withdrawn   |
| 627399 | F | Amhara Re A Level or I   | 0 | 60  | N | Pass        |
| 627435 | F | Addis Abak Lower Than    | 0 | 30  | N | Withdrawn   |
| 627500 | M | South Regi Lower Than    | 0 | 60  | N | Withdrawn   |
| 627516 | M | Tigrai Regi Lower Than   | 0 | 60  | N | Withdrawn   |
| 627520 | M | Afar Regi HE Qualific    | 0 | 30  | N | Withdrawn   |
| 627632 | M | Addis Abak Lower Than    | 0 | 30  | Y | Withdrawn   |
| 627635 | M | South Regi A Level or I  | 0 | 60  | N | Fail        |
| 627636 | M | Somalia Re Lower Than    | 0 | 60  | N | Withdrawn   |
| 627691 | M | South Wes HE Qualific    | 0 | 60  | N | Pass        |
| 627711 | M | South Regi A Level or I  | 0 | 60  | N | Withdrawn   |
| 627747 | M | Oromia Re A Level or I   | 0 | 30  | N | Pass        |
| 627750 | F | Afar Regi HE Qualific    | 0 | 60  | N | Pass        |
| 627784 | M | Sidamo Re A Level or I   | 0 | 60  | N | Withdrawn   |
| 627907 | M | South Regi Lower Than    | 0 | 60  | N | Withdrawn   |
| 627933 | M | Afar Regi A Level or I   | 0 | 120 | Y | Fail        |
| 627947 | F | South Regi A Level or I  | 0 | 60  | N | Withdrawn   |
| 628022 | M | Sidamo Re A Level or I   | 0 | 60  | N | Withdrawn   |
| 628029 | F | Amhara Re A Level or I   | 0 | 60  | N | Withdrawn   |
| 628053 | M | Sidamo Re HE Qualific    | 0 | 60  | N | Fail        |



|        |   |                          |   |     |   |             |
|--------|---|--------------------------|---|-----|---|-------------|
| 628086 | M | Somalia Re A Level or I  | 0 | 60  | N | Pass        |
| 628090 | M | Sidamo Re HE Qualific    | 0 | 30  | N | Fail        |
| 628122 | F | Afar Region HE Qualific  | 0 | 30  | N | Fail        |
| 628141 | M | South Wes Lower Tha      | 0 | 120 | N | Withdrawn   |
| 628157 | F | Amhara Re A Level or I   | 0 | 30  | N | Distinction |
| 628214 | M | Oromia Re Lower Tha      | 0 | 60  | N | Withdrawn   |
| 628293 | M | South Regi HE Qualific   | 0 | 30  | N | Pass        |
| 628366 | M | Afar Region Lower Tha    | 0 | 60  | N | Withdrawn   |
| 628383 | M | Sidamo Re HE Qualific    | 0 | 30  | N | Pass        |
| 628506 | M | Addis Abat A Level or I  | 0 | 30  | N | Pass        |
| 628527 | M | Tigrai Regi A Level or I | 0 | 60  | N | Withdrawn   |
| 628565 | M | Addis Abat A Level or I  | 0 | 60  | N | Withdrawn   |
| 628575 | M | Afar Region A Level or I | 0 | 90  | N | Pass        |
| 628663 | M | North Regi Lower Tha     | 0 | 30  | N | Pass        |
| 628677 | F | Afar Region Lower Tha    | 0 | 90  | N | Withdrawn   |
| 628718 | M | Afar Region A Level or I | 0 | 90  | Y | Withdrawn   |
| 628725 | M | North Regi Lower Tha     | 0 | 90  | N | Withdrawn   |
| 628771 | F | South Regi HE Qualific   | 0 | 30  | N | Withdrawn   |
| 628803 | M | Sidamo Re A Level or I   | 0 | 90  | N | Withdrawn   |
| 628846 | M | South Wes A Level or I   | 0 | 90  | N | Withdrawn   |
| 628938 | M | South Regi A Level or I  | 0 | 60  | N | Withdrawn   |
| 628993 | M | South Regi HE Qualific   | 0 | 60  | N | Withdrawn   |
| 629081 | M | Afar Region HE Qualific  | 0 | 60  | N | Fail        |
| 629164 | M | South Regi Lower Tha     | 0 | 60  | N | Distinction |
| 629209 | M | North Regi HE Qualific   | 0 | 30  | N | Withdrawn   |
| 629270 | M | Tigrai Regi A Level or I | 0 | 90  | N | Fail        |
| 629342 | F | Sidamo Re HE Qualific    | 0 | 60  | N | Withdrawn   |
| 629445 | F | Sidamo Re HE Qualific    | 0 | 30  | N | Withdrawn   |
| 629500 | M | Oromia Re A Level or I   | 0 | 60  | N | Withdrawn   |
| 629560 | F | Amhara Re Lower Tha      | 0 | 60  | N | Withdrawn   |
| 629601 | M | Afar Region HE Qualific  | 0 | 60  | N | Withdrawn   |
| 629613 | F | Sidamo Re Lower Tha      | 0 | 90  | N | Fail        |
| 629623 | M | Sidamo Re A Level or I   | 0 | 60  | N | Withdrawn   |
| 629628 | M | Sidamo Re Lower Tha      | 0 | 60  | N | Withdrawn   |
| 629632 | F | Amhara Re A Level or I   | 0 | 90  | Y | Withdrawn   |
| 629654 | F | South Regi A Level or I  | 0 | 60  | N | Fail        |
| 629692 | M | Amhara Re A Level or I   | 0 | 120 | N | Withdrawn   |
| 629694 | M | Tigrai Regi A Level or I | 0 | 90  | N | Fail        |
| 629696 | M | Tigrai Regi HE Qualific  | 0 | 90  | N | Withdrawn   |
| 629710 | M | North Regi HE Qualific   | 0 | 90  | N | Distinction |
| 629766 | M | Oromia Re Lower Tha      | 0 | 60  | N | Pass        |
| 629773 | M | Oromia Re A Level or I   | 0 | 90  | Y | Withdrawn   |
| 629798 | M | Oromia Re Lower Tha      | 0 | 60  | N | Withdrawn   |
| 629862 | M | South Regi Lower Tha     | 0 | 90  | N | Pass        |
| 629887 | M | Amhara Re HE Qualific    | 0 | 60  | N | Withdrawn   |
| 629890 | M | Sidamo Re A Level or I   | 0 | 30  | N | Fail        |
| 629893 | M | South Wes A Level or I   | 0 | 60  | N | Withdrawn   |

|        |   |                         |   |     |   |             |
|--------|---|-------------------------|---|-----|---|-------------|
| 629906 | M | Amhara Re Lower Tha     | 0 | 60  | Y | Withdrawn   |
| 629936 | M | Amhara Re Lower Tha     | 0 | 60  | N | Fail        |
| 630005 | M | Afar Regio Lower Tha    | 0 | 60  | N | Withdrawn   |
| 630012 | M | Sidamo Re A Level or I  | 0 | 60  | N | Distinction |
| 630047 | M | Oromia Re Lower Tha     | 0 | 60  | N | Pass        |
| 630086 | M | Afar Regio HE Qualific  | 0 | 60  | N | Pass        |
| 630152 | M | South Wes A Level or I  | 0 | 90  | N | Fail        |
| 630157 | M | Sidamo Re HE Qualific   | 0 | 30  | N | Pass        |
| 630178 | M | South Regi Lower Tha    | 0 | 90  | N | Pass        |
| 630200 | F | Somalia Re A Level or I | 0 | 90  | N | Withdrawn   |
| 630211 | M | South Wes HE Qualific   | 0 | 30  | N | Pass        |
| 630449 | M | South Wes A Level or I  | 0 | 60  | N | Fail        |
| 630471 | M | Sidamo Re A Level or I  | 0 | 60  | N | Fail        |
| 630514 | M | Somalia Re A Level or I | 0 | 60  | N | Withdrawn   |
| 630531 | M | North Regi Lower Tha    | 0 | 90  | N | Withdrawn   |
| 630540 | F | Somalia Re Lower Tha    | 0 | 90  | N | Withdrawn   |
| 630573 | M | Addis Abak HE Qualific  | 0 | 60  | N | Withdrawn   |
| 630585 | M | Amhara Re Lower Tha     | 0 | 120 | N | Fail        |
| 630606 | M | Addis Abak A Level or I | 0 | 60  | N | Pass        |
| 630613 | F | Addis Abak A Level or I | 0 | 90  | N | Pass        |
| 630635 | M | Sidamo Re A Level or I  | 0 | 60  | N | Fail        |
| 630657 | M | North Regi A Level or I | 0 | 60  | N | Withdrawn   |
| 630730 | F | Addis Abak A Level or I | 0 | 60  | N | Fail        |
| 630825 | M | Somalia Re Lower Tha    | 0 | 60  | N | Fail        |
| 630888 | M | Amhara Re A Level or I  | 0 | 60  | N | Withdrawn   |
| 630896 | M | North Regi A Level or I | 0 | 60  | Y | Distinction |
| 630912 | M | Afar Regio A Level or I | 0 | 120 | N | Fail        |
| 631038 | F | South Regi A Level or I | 0 | 60  | N | Withdrawn   |
| 631044 | M | Afar Regio HE Qualific  | 0 | 30  | N | Pass        |
| 631051 | M | Sidamo Re Lower Tha     | 0 | 60  | N | Withdrawn   |
| 631075 | M | Afar Regio A Level or I | 0 | 90  | N | Withdrawn   |
| 631122 | M | Sidamo Re A Level or I  | 0 | 60  | N | Fail        |
| 631216 | M | Afar Regio Lower Tha    | 0 | 60  | N | Fail        |
| 631300 | M | Addis Abak A Level or I | 0 | 90  | N | Withdrawn   |
| 631334 | M | South Regi A Level or I | 0 | 60  | Y | Pass        |
| 631365 | M | Amhara Re A Level or I  | 0 | 90  | N | Withdrawn   |
| 631453 | M | South Regi A Level or I | 0 | 60  | N | Fail        |
| 631455 | M | North Regi Post Gradu   | 0 | 60  | N | Distinction |
| 631473 | M | Sidamo Re Lower Tha     | 0 | 120 | N | Distinction |
| 631583 | M | Sidamo Re A Level or I  | 0 | 60  | N | Pass        |
| 631655 | M | Addis Abak HE Qualific  | 0 | 60  | N | Fail        |
| 631657 | M | Afar Regio HE Qualific  | 0 | 60  | N | Withdrawn   |
| 631699 | M | North Regi Post Gradu   | 0 | 30  | N | Distinction |
| 631715 | M | South Regi HE Qualific  | 0 | 30  | N | Pass        |
| 631770 | M | South Regi A Level or I | 0 | 60  | N | Fail        |
| 631772 | M | Afar Regio Lower Tha    | 0 | 30  | N | Pass        |
| 631850 | M | Afar Regio Post Gradu   | 0 | 60  | N | Distinction |

|        |   |                          |   |     |   |             |
|--------|---|--------------------------|---|-----|---|-------------|
| 631925 | M | North Regi Lower Tha     | 0 | 90  | N | Withdrawn   |
| 631929 | F | Sidamo Re A Level or I   | 0 | 60  | Y | Withdrawn   |
| 631981 | F | North Regi Post Gradu    | 0 | 30  | N | Pass        |
| 632017 | F | North Regi HE Qualific   | 0 | 60  | N | Pass        |
| 632037 | F | South Wes HE Qualific    | 0 | 100 | N | Fail        |
| 632074 | M | Afar Regioi A Level or I | 0 | 60  | N | Pass        |
| 632107 | M | North Regi HE Qualific   | 0 | 30  | N | Withdrawn   |
| 632111 | M | Amhara Re A Level or I   | 0 | 60  | N | Pass        |
| 632114 | M | Sidamo Re A Level or I   | 0 | 90  | N | Withdrawn   |
| 632133 | F | South Regi Lower Tha     | 0 | 60  | N | Withdrawn   |
| 632134 | M | Sidamo Re A Level or I   | 0 | 60  | N | Withdrawn   |
| 632135 | M | South Regi Lower Tha     | 0 | 60  | N | Withdrawn   |
| 632190 | F | South Regi A Level or I  | 0 | 60  | N | Withdrawn   |
| 632242 | M | South Wes A Level or I   | 0 | 60  | N | Withdrawn   |
| 632260 | F | South Wes Lower Tha      | 0 | 150 | N | Withdrawn   |
| 632312 | M | South Wes A Level or I   | 0 | 60  | N | Fail        |
| 632313 | M | Amhara Re A Level or I   | 0 | 60  | N | Distinction |
| 632332 | M | Sidamo Re A Level or I   | 0 | 60  | N | Withdrawn   |
| 632459 | M | Sidamo Re A Level or I   | 0 | 60  | N | Pass        |
| 632486 | F | South Regi A Level or I  | 0 | 90  | N | Withdrawn   |
| 632487 | F | North Regi A Level or I  | 0 | 60  | N | Withdrawn   |
| 632506 | M | South Regi Lower Tha     | 0 | 60  | N | Fail        |
| 632546 | M | Afar Regioi A Level or I | 0 | 60  | N | Fail        |
| 632554 | M | Addis Abak HE Qualific   | 0 | 90  | Y | Distinction |
| 632571 | M | Tigrai Regi A Level or I | 0 | 30  | Y | Pass        |
| 632597 | M | Tigrai Regi A Level or I | 0 | 30  | N | Pass        |
| 632637 | M | Sidamo Re Lower Tha      | 0 | 120 | N | Withdrawn   |
| 632641 | F | South Regi A Level or I  | 0 | 60  | N | Withdrawn   |
| 632691 | M | South Regi A Level or I  | 0 | 120 | N | Withdrawn   |
| 632780 | M | Sidamo Re HE Qualific    | 0 | 60  | N | Withdrawn   |
| 632836 | F | Sidamo Re Lower Tha      | 0 | 30  | N | Distinction |
| 632856 | M | Sidamo Re A Level or I   | 0 | 90  | N | Withdrawn   |
| 632889 | M | Sidamo Re A Level or I   | 0 | 60  | N | Withdrawn   |
| 632900 | F | South Regi A Level or I  | 0 | 60  | N | Pass        |
| 632903 | M | North Regi Lower Tha     | 0 | 30  | N | Withdrawn   |
| 633071 | M | South Regi Lower Tha     | 0 | 30  | Y | Withdrawn   |
| 633112 | F | Sidamo Re A Level or I   | 0 | 60  | N | Distinction |
| 633178 | F | Afar Regioi A Level or I | 0 | 60  | N | Pass        |
| 633240 | M | Sidamo Re Post Gradu     | 0 | 30  | N | Withdrawn   |
| 633243 | M | Addis Abak Lower Tha     | 0 | 120 | N | Withdrawn   |
| 633250 | M | Sidamo Re A Level or I   | 0 | 60  | N | Pass        |
| 633256 | M | North Regi Post Gradu    | 0 | 60  | N | Withdrawn   |
| 633270 | M | South Wes No Formal      | 0 | 60  | N | Pass        |
| 633281 | F | Oromia Re HE Qualific    | 0 | 60  | N | Distinction |
| 633310 | M | Somalia Re A Level or I  | 0 | 60  | N | Fail        |
| 633330 | M | Oromia Re A Level or I   | 0 | 60  | N | Fail        |
| 633341 | F | Amhara Re A Level or I   | 0 | 90  | N | Fail        |

|        |   |                          |   |     |   |             |
|--------|---|--------------------------|---|-----|---|-------------|
| 633384 | M | Oromia Re Lower Tha      | 0 | 90  | N | Withdrawn   |
| 633395 | M | Amhara Re A Level or I   | 0 | 60  | N | Fail        |
| 633432 | M | South Regi A Level or I  | 0 | 60  | N | Withdrawn   |
| 633447 | F | South Wes HE Qualific    | 0 | 30  | N | Fail        |
| 633455 | M | Amhara Re Lower Tha      | 0 | 60  | N | Withdrawn   |
| 633460 | M | Addis Abat Lower Tha     | 0 | 30  | N | Fail        |
| 633493 | M | North Regi A Level or I  | 0 | 30  | Y | Distinction |
| 633527 | M | Sidamo Re HE Qualific    | 0 | 30  | N | Withdrawn   |
| 633637 | M | Sidamo Re A Level or I   | 0 | 60  | N | Fail        |
| 633679 | F | Sidamo Re HE Qualific    | 0 | 60  | N | Withdrawn   |
| 633695 | M | Sidamo Re A Level or I   | 0 | 60  | N | Distinction |
| 633716 | M | Tigrai Regi A Level or I | 0 | 60  | N | Withdrawn   |
| 633722 | M | Afar Regio HE Qualific   | 0 | 30  | N | Distinction |
| 633857 | F | North Regi Lower Tha     | 0 | 60  | N | Distinction |
| 633859 | M | North Regi Lower Tha     | 0 | 60  | N | Withdrawn   |
| 633913 | M | Afar Regio HE Qualific   | 0 | 60  | N | Withdrawn   |
| 633942 | F | Amhara Re A Level or I   | 0 | 30  | N | Distinction |
| 633998 | F | Afar Regio HE Qualific   | 0 | 60  | N | Pass        |
| 634040 | M | Afar Regio A Level or I  | 0 | 60  | N | Fail        |
| 634057 | M | South Wes No Formal      | 0 | 90  | N | Withdrawn   |
| 634083 | M | South Wes A Level or I   | 0 | 60  | N | Withdrawn   |
| 634128 | F | South Wes A Level or I   | 0 | 60  | Y | Pass        |
| 634139 | M | South Regi A Level or I  | 0 | 120 | N | Withdrawn   |
| 634157 | M | North Regi Lower Tha     | 0 | 60  | N | Pass        |
| 634167 | M | Tigrai Regi A Level or I | 0 | 60  | N | Distinction |
| 634176 | M | Oromia Re Lower Tha      | 0 | 90  | N | Withdrawn   |
| 634216 | M | South Wes HE Qualific    | 0 | 60  | N | Pass        |
| 634217 | M | Afar Regio Lower Tha     | 0 | 60  | N | Distinction |
| 634241 | M | South Regi A Level or I  | 0 | 60  | N | Pass        |
| 634279 | M | Somalia Re A Level or I  | 0 | 120 | N | Fail        |
| 634349 | M | Afar Regio A Level or I  | 0 | 120 | N | Fail        |
| 634414 | M | North Regi Lower Tha     | 0 | 60  | N | Fail        |
| 634433 | M | North Regi A Level or I  | 0 | 60  | N | Fail        |
| 634500 | M | Sidamo Re A Level or I   | 0 | 120 | N | Pass        |
| 634507 | M | South Regi HE Qualific   | 0 | 60  | N | Pass        |
| 634512 | M | Amhara Re Lower Tha      | 0 | 30  | N | Distinction |
| 634523 | M | Addis Abat Lower Tha     | 0 | 30  | N | Withdrawn   |
| 634570 | M | Addis Abat HE Qualific   | 0 | 60  | N | Pass        |
| 634578 | M | Afar Regio A Level or I  | 0 | 60  | N | Withdrawn   |
| 634589 | F | Amhara Re A Level or I   | 0 | 30  | N | Pass        |
| 634618 | M | North Regi HE Qualific   | 0 | 30  | N | Distinction |
| 634649 | F | Afar Regio A Level or I  | 0 | 30  | N | Fail        |
| 634655 | M | Sidamo Re HE Qualific    | 0 | 60  | N | Withdrawn   |
| 634671 | M | Sidamo Re HE Qualific    | 0 | 30  | N | Pass        |
| 634737 | M | Sidamo Re Lower Tha      | 0 | 90  | N | Withdrawn   |
| 634744 | M | Afar Regio HE Qualific   | 0 | 60  | N | Fail        |
| 634816 | M | Tigrai Regi HE Qualific  | 0 | 120 | N | Pass        |

|         |   |                         |   |     |   |             |
|---------|---|-------------------------|---|-----|---|-------------|
| 634853  | M | South Wes Post Gradu    | 0 | 60  | N | Withdrawn   |
| 634862  | F | South Regi A Level or I | 0 | 60  | N | Pass        |
| 634878  | F | Tigrai Regi HE Qualific | 0 | 30  | N | Pass        |
| 635034  | M | South Regi HE Qualific  | 0 | 90  | N | Withdrawn   |
| 635041  | M | Somalia Re A Level or I | 0 | 60  | N | Withdrawn   |
| 635043  | M | Somalia Re HE Qualific  | 0 | 60  | N | Pass        |
| 635109  | M | South Wes Lower Thar    | 0 | 60  | N | Pass        |
| 635416  | F | Afar Regio Lower Thar   | 0 | 30  | N | Pass        |
| 635515  | M | Afar Regio Lower Thar   | 0 | 60  | N | Fail        |
| 835603  | M | Amhara Re HE Qualific   | 0 | 150 | N | Withdrawn   |
| 856294  | M | Oromia Re HE Qualific   | 0 | 30  | N | Withdrawn   |
| 917586  | M | South Regi HE Qualific  | 0 | 60  | N | Distinction |
| 925553  | M | Sidamo Re HE Qualific   | 0 | 120 | N | Distinction |
| 949548  | M | Sidamo Re A Level or I  | 0 | 60  | N | Pass        |
| 984619  | M | South Wes HE Qualific   | 0 | 30  | N | Pass        |
| 992544  | M | Afar Regio Post Gradu   | 0 | 180 | N | Pass        |
| 1038161 | M | Afar Regio HE Qualific  | 0 | 30  | N | Pass        |
| 1047645 | F | Oromia Re A Level or I  | 0 | 150 | N | Withdrawn   |
| 1057883 | M | Sidamo Re A Level or I  | 0 | 60  | N | Pass        |
| 1073766 | M | Somalia Re HE Qualific  | 0 | 60  | N | Pass        |
| 1087710 | F | Amhara Re HE Qualific   | 0 | 60  | N | Withdrawn   |
| 1095916 | M | South Regi A Level or I | 0 | 30  | N | Pass        |
| 1100639 | F | South Regi A Level or I | 0 | 30  | N | Withdrawn   |
| 1106724 | F | Somalia Re Lower Thar   | 0 | 30  | N | Withdrawn   |
| 1115623 | M | Afar Regio A Level or I | 0 | 30  | N | Pass        |
| 1187586 | M | Afar Regio HE Qualific  | 0 | 90  | N | Distinction |
| 1268772 | M | Afar Regio HE Qualific  | 0 | 60  | N | Fail        |
| 1270832 | F | South Regi Post Gradu   | 0 | 60  | N | Distinction |
| 1307784 | F | Sidamo Re HE Qualific   | 0 | 60  | N | Withdrawn   |
| 1311171 | M | South Regi A Level or I | 0 | 60  | N | Distinction |
| 1398821 | M | Somalia Re HE Qualific  | 0 | 90  | N | Withdrawn   |
| 1407549 | F | Addis Abak A Level or I | 0 | 150 | N | Withdrawn   |
| 1416784 | F | North Regi HE Qualific  | 0 | 30  | N | Distinction |
| 1440467 | M | Addis Abak A Level or I | 0 | 90  | N | Distinction |
| 1442991 | M | Afar Regio HE Qualific  | 0 | 150 | N | Pass        |
| 1462676 | M | South Regi HE Qualific  | 0 | 30  | N | Withdrawn   |
| 1464952 | M | Addis Abak HE Qualific  | 0 | 180 | N | Withdrawn   |
| 1468838 | F | South Wes Lower Thar    | 0 | 60  | N | Withdrawn   |
| 1470291 | F | South Wes HE Qualific   | 0 | 90  | N | Pass        |
| 1474869 | F | South Regi A Level or I | 0 | 630 | Y | Pass        |
| 1493739 | M | Oromia Re A Level or I  | 0 | 180 | N | Pass        |
| 1514245 | M | Somalia Re Lower Thar   | 0 | 90  | N | Withdrawn   |
| 1534494 | M | South Regi Post Gradu   | 0 | 30  | N | Pass        |
| 1541906 | M | South Regi Lower Thar   | 0 | 60  | N | Withdrawn   |
| 1551895 | M | Amhara Re HE Qualific   | 0 | 120 | N | Withdrawn   |
| 1560205 | F | South Wes A Level or I  | 0 | 90  | N | Withdrawn   |
| 1561431 | M | Somalia Re Lower Thar   | 0 | 60  | N | Fail        |

|         |   |                                |   |     |   |             |
|---------|---|--------------------------------|---|-----|---|-------------|
| 1568828 | M | Tigrai Region HE Qualification | 0 | 30  | N | Distinction |
| 1591013 | M | South Region Lower Than        | 0 | 60  | N | Withdrawn   |
| 1600062 | M | Sidamo Region A Level or       | 0 | 90  | N | Withdrawn   |
| 1619251 | F | Afar Region HE Qualific        | 0 | 90  | N | Withdrawn   |
| 1632487 | M | Sidamo Region Lower Than       | 0 | 60  | N | Pass        |
| 1638548 | M | Afar Region A Level or         | 0 | 70  | N | Withdrawn   |
| 1644328 | M | Somalia Region HE Qualific     | 0 | 60  | N | Withdrawn   |
| 1649896 | F | North Region Lower Than        | 0 | 60  | N | Withdrawn   |
| 1656486 | F | Oromia Region HE Qualific      | 0 | 60  | N | Withdrawn   |
| 1664810 | M | Oromia Region Lower Than       | 0 | 60  | N | Withdrawn   |
| 1668504 | M | Addis Ababa A Level or         | 0 | 90  | N | Withdrawn   |
| 1671811 | M | South Region A Level or        | 0 | 90  | N | Pass        |
| 1672690 | M | Oromia Region HE Qualific      | 0 | 30  | N | Fail        |
| 1673876 | M | Sidamo Region HE Qualific      | 0 | 120 | N | Withdrawn   |
| 1678014 | M | Tigrai Region Lower Than       | 0 | 30  | N | Withdrawn   |
| 1678800 | M | Afar Region A Level or         | 0 | 90  | N | Pass        |
| 1691815 | M | Sidamo Region A Level or       | 0 | 60  | N | Fail        |
| 1694780 | M | South West A Level or          | 0 | 30  | N | Fail        |
| 1715237 | M | South West A Level or          | 0 | 60  | N | Distinction |
| 1739026 | F | North Region Lower Than        | 0 | 30  | N | Fail        |
| 1750405 | M | Addis Ababa HE Qualific        | 0 | 30  | N | Fail        |
| 1753458 | M | North Region HE Qualific       | 0 | 60  | N | Distinction |
| 1763378 | M | Afar Region A Level or         | 0 | 40  | N | Fail        |
| 1769985 | M | South West HE Qualific         | 0 | 30  | N | Withdrawn   |
| 1774071 | M | South West HE Qualific         | 0 | 30  | N | Withdrawn   |
| 1780737 | M | South Region A Level or        | 0 | 60  | Y | Withdrawn   |
| 1781834 | M | South West HE Qualific         | 0 | 75  | N | Pass        |
| 1828112 | M | South Region A Level or        | 0 | 60  | N | Withdrawn   |
| 1841267 | F | Afar Region A Level or         | 0 | 60  | N | Withdrawn   |
| 1848820 | M | North Region Lower Than        | 0 | 90  | N | Withdrawn   |
| 1855583 | F | Afar Region HE Qualific        | 0 | 60  | N | Pass        |
| 1876636 | F | South West A Level or          | 0 | 120 | N | Distinction |
| 1877015 | M | South Region Lower Than        | 0 | 60  | N | Withdrawn   |
| 1877732 | M | South Region HE Qualific       | 0 | 90  | N | Withdrawn   |
| 1888343 | M | South West Lower Than          | 0 | 60  | N | Pass        |
| 1891323 | M | South West A Level or          | 0 | 60  | N | Pass        |
| 1894419 | M | Sidamo Region A Level or       | 0 | 60  | N | Withdrawn   |
| 1896088 | M | South Region A Level or        | 0 | 60  | N | Withdrawn   |
| 1906919 | M | Amhara Region Lower Than       | 0 | 60  | N | Pass        |
| 1908526 | M | Afar Region HE Qualific        | 0 | 60  | N | Fail        |
| 1911513 | F | Sidamo Region A Level or       | 0 | 60  | Y | Pass        |
| 1922200 | M | South West Lower Than          | 0 | 30  | N | Fail        |
| 1924641 | M | Afar Region HE Qualific        | 0 | 120 | N | Fail        |
| 1930146 | M | South Region A Level or        | 0 | 45  | N | Pass        |
| 1930644 | M | Afar Region Lower Than         | 0 | 90  | N | Withdrawn   |
| 1937511 | F | North Region HE Qualific       | 0 | 150 | N | Withdrawn   |
| 1938024 | F | North Region A Level or        | 0 | 60  | N | Withdrawn   |

|         |   |                          |   |     |   |             |
|---------|---|--------------------------|---|-----|---|-------------|
| 1942999 | F | Somalia Re HE Qualific   | 0 | 90  | N | Withdrawn   |
| 1945240 | M | Somalia Re Lower Thai    | 0 | 90  | N | Withdrawn   |
| 1947911 | F | South Regi HE Qualific   | 0 | 60  | N | Withdrawn   |
| 1951080 | M | South Regi A Level or I  | 0 | 90  | N | Withdrawn   |
| 1951139 | F | Afar Regio A Level or I  | 0 | 30  | Y | Pass        |
| 1969407 | M | Addis Abak HE Qualific   | 0 | 30  | N | Fail        |
| 1997164 | M | South Wes Post Gradu     | 0 | 60  | N | Pass        |
| 2008262 | M | Sidamo Re HE Qualific    | 0 | 60  | N | Withdrawn   |
| 2016517 | M | Amhara Re Lower Thai     | 0 | 75  | N | Pass        |
| 2030117 | M | Afar Regio HE Qualific   | 0 | 30  | N | Withdrawn   |
| 2032058 | M | South Wes Lower Thai     | 0 | 40  | N | Withdrawn   |
| 2044299 | M | Afar Regio HE Qualific   | 0 | 120 | N | Withdrawn   |
| 2047421 | M | Oromia Re A Level or I   | 0 | 30  | N | Pass        |
| 2049668 | F | Amhara Re HE Qualific    | 0 | 90  | N | Pass        |
| 2056643 | M | Afar Regio A Level or I  | 0 | 60  | Y | Distinction |
| 2063578 | M | Afar Regio A Level or I  | 0 | 60  | N | Distinction |
| 2064873 | M | Somalia Re Lower Thai    | 0 | 60  | N | Distinction |
| 2066504 | M | Sidamo Re HE Qualific    | 0 | 90  | N | Withdrawn   |
| 2080916 | M | Afar Regio HE Qualific   | 0 | 90  | N | Withdrawn   |
| 2087182 | M | North Regi A Level or I  | 0 | 30  | N | Fail        |
| 2088765 | F | South Regi HE Qualific   | 0 | 60  | Y | Pass        |
| 2096918 | M | South Wes A Level or I   | 0 | 60  | N | Withdrawn   |
| 2109119 | M | Addis Abak HE Qualific   | 0 | 60  | N | Pass        |
| 2110039 | M | Sidamo Re Lower Thai     | 0 | 90  | Y | Withdrawn   |
| 2113778 | F | Addis Abak Lower Thai    | 0 | 60  | N | Withdrawn   |
| 2131908 | M | Addis Abak A Level or I  | 0 | 60  | N | Distinction |
| 2134237 | M | North Regi HE Qualific   | 0 | 90  | N | Fail        |
| 2134304 | M | Afar Regio Lower Thai    | 0 | 60  | N | Fail        |
| 2139037 | F | Addis Abak HE Qualific   | 0 | 60  | N | Distinction |
| 2139273 | M | Afar Regio A Level or I  | 0 | 90  | N | Withdrawn   |
| 2142662 | M | Somalia Re HE Qualific   | 0 | 30  | N | Withdrawn   |
| 2146277 | F | Addis Abak A Level or I  | 0 | 90  | N | Pass        |
| 2147620 | F | Addis Abak HE Qualific   | 0 | 30  | N | Pass        |
| 2147713 | M | Tigrai Regi A Level or I | 0 | 150 | N | Pass        |
| 2148297 | F | Somalia Re Lower Thai    | 0 | 210 | N | Withdrawn   |
| 2156058 | M | Addis Abak HE Qualific   | 0 | 30  | N | Distinction |
| 2171264 | M | South Regi A Level or I  | 0 | 30  | N | Fail        |
| 2171834 | M | Afar Regio HE Qualific   | 0 | 120 | N | Pass        |
| 2178929 | M | Sidamo Re A Level or I   | 0 | 30  | N | Distinction |
| 2187422 | M | Amhara Re Lower Thai     | 0 | 60  | N | Pass        |
| 2188680 | M | South Wes Lower Thai     | 0 | 60  | N | Withdrawn   |
| 2198356 | M | Sidamo Re Lower Thai     | 0 | 60  | N | Withdrawn   |
| 2202076 | M | South Wes Lower Thai     | 0 | 90  | N | Withdrawn   |
| 2211797 | M | Afar Regio A Level or I  | 0 | 100 | N | Pass        |
| 2213982 | M | Addis Abak Lower Thai    | 0 | 330 | N | Withdrawn   |
| 2229583 | F | Sidamo Re A Level or I   | 0 | 30  | Y | Withdrawn   |
| 2236538 | M | Addis Abak Lower Thai    | 0 | 90  | N | Fail        |

|         |   |                         |   |     |   |             |
|---------|---|-------------------------|---|-----|---|-------------|
| 2238904 | M | South Wes Lower Thai    | 0 | 30  | N | Fail        |
| 2239848 | M | Sidamo Re Lower Thai    | 0 | 60  | Y | Pass        |
| 2241036 | M | South Wes A Level or I  | 0 | 30  | N | Fail        |
| 2247222 | M | Amhara Re HE Qualific   | 0 | 30  | N | Pass        |
| 2252437 | M | Amhara Re Lower Thai    | 0 | 60  | N | Withdrawn   |
| 2258228 | M | Addis Abak Lower Thai   | 0 | 60  | N | Fail        |
| 2289032 | M | South Regi A Level or I | 0 | 60  | N | Fail        |
| 2298895 | M | Addis Abak A Level or I | 0 | 30  | N | Pass        |
| 2327710 | M | South Wes Lower Thai    | 0 | 355 | Y | Withdrawn   |
| 2329539 | M | Sidamo Re Lower Thai    | 0 | 60  | N | Withdrawn   |
| 2341839 | F | Amhara Re Lower Thai    | 0 | 30  | N | Withdrawn   |
| 2343809 | F | Sidamo Re A Level or I  | 0 | 150 | N | Withdrawn   |
| 2347802 | F | Sidamo Re A Level or I  | 0 | 30  | N | Distinction |
| 2355744 | M | Afar Regio HE Qualific  | 0 | 30  | N | Withdrawn   |
| 2358707 | F | South Wes A Level or I  | 0 | 120 | N | Withdrawn   |
| 2365009 | M | South Wes Lower Thai    | 0 | 90  | N | Withdrawn   |
| 2367058 | M | South Regi Lower Thai   | 0 | 90  | N | Withdrawn   |
| 2374376 | M | Afar Regio HE Qualific  | 0 | 45  | N | Withdrawn   |
| 2375259 | M | Addis Abak A Level or I | 0 | 30  | N | Withdrawn   |
| 2383036 | F | Sidamo Re A Level or I  | 0 | 120 | N | Withdrawn   |
| 2384615 | M | Afar Regio A Level or I | 0 | 150 | N | Withdrawn   |
| 2384687 | F | South Wes Lower Thai    | 0 | 70  | N | Withdrawn   |
| 2389754 | M | North Regi HE Qualific  | 0 | 60  | N | Withdrawn   |
| 2391004 | M | Afar Regio HE Qualific  | 0 | 60  | N | Pass        |
| 2394090 | F | South Regi A Level or I | 0 | 90  | N | Withdrawn   |
| 2408651 | M | Addis Abak HE Qualific  | 0 | 30  | N | Withdrawn   |
| 2410459 | M | South Regi Lower Thai   | 0 | 30  | Y | Fail        |
| 2410519 | M | South Regi A Level or I | 0 | 90  | N | Distinction |
| 2418732 | F | North Regi HE Qualific  | 0 | 60  | N | Distinction |
| 2419115 | F | South Regi A Level or I | 0 | 90  | N | Distinction |
| 2421961 | M | Sidamo Re A Level or I  | 0 | 150 | N | Withdrawn   |
| 2433069 | M | Addis Abak A Level or I | 0 | 60  | N | Distinction |
| 2433221 | F | Addis Abak A Level or I | 0 | 120 | Y | Pass        |
| 2436400 | M | Amhara Re Lower Thai    | 0 | 90  | N | Withdrawn   |
| 2446778 | F | Sidamo Re A Level or I  | 0 | 90  | N | Withdrawn   |
| 2447528 | F | Afar Regio HE Qualific  | 0 | 30  | N | Fail        |
| 2451726 | F | North Regi Lower Thai   | 0 | 60  | N | Withdrawn   |
| 2454878 | F | South Regi Lower Thai   | 0 | 90  | Y | Fail        |
| 2464727 | F | Sidamo Re Lower Thai    | 0 | 60  | Y | Withdrawn   |
| 2471283 | M | Afar Regio Post Gradu   | 0 | 30  | N | Pass        |
| 2473058 | M | South Regi A Level or I | 0 | 90  | N | Withdrawn   |
| 2478799 | M | Addis Abak Lower Thai   | 0 | 60  | N | Withdrawn   |
| 2486769 | M | Sidamo Re HE Qualific   | 0 | 90  | N | Fail        |
| 2488382 | F | Afar Regio HE Qualific  | 0 | 30  | N | Pass        |
| 2488713 | M | Amhara Re HE Qualific   | 0 | 30  | N | Withdrawn   |
| 2493107 | F | Amhara Re Lower Thai    | 0 | 90  | Y | Withdrawn   |
| 2494507 | M | Afar Regio HE Qualific  | 0 | 30  | N | Pass        |



|         |   |                          |   |     |   |             |
|---------|---|--------------------------|---|-----|---|-------------|
| 2498388 | F | North Regi Lower Tha     | 0 | 30  | Y | Pass        |
| 2503063 | M | Somalia Re A Level or I  | 0 | 90  | N | Pass        |
| 2513997 | M | Sidamo Re HE Qualific    | 0 | 60  | N | Fail        |
| 2517778 | F | Amhara Re Lower Tha      | 0 | 150 | N | Withdrawn   |
| 2522932 | F | Afar Regio HE Qualific   | 0 | 150 | N | Withdrawn   |
| 2524572 | M | Oromia Re A Level or I   | 0 | 90  | Y | Withdrawn   |
| 2526493 | F | Afar Regio A Level or I  | 0 | 60  | N | Distinction |
| 2529663 | F | Tigrai Regi A Level or I | 0 | 30  | N | Pass        |
| 2530985 | M | Sidamo Re HE Qualific    | 0 | 30  | N | Withdrawn   |
| 2545113 | M | Amhara Re A Level or I   | 0 | 30  | N | Pass        |
| 2548877 | M | Sidamo Re HE Qualific    | 0 | 30  | N | Pass        |
| 2555596 | M | South Regi A Level or I  | 0 | 90  | N | Withdrawn   |
| 2556060 | M | Sidamo Re Lower Tha      | 0 | 30  | N | Distinction |
| 2558365 | M | Amhara Re A Level or I   | 0 | 90  | N | Withdrawn   |
| 2564333 | M | Amhara Re A Level or I   | 0 | 60  | Y | Withdrawn   |
| 2564711 | M | South Wes A Level or I   | 0 | 60  | Y | Distinction |
| 2567038 | M | Afar Regio A Level or I  | 0 | 60  | N | Pass        |
| 2569090 | M | South Regi A Level or I  | 0 | 60  | N | Withdrawn   |
| 2569834 | F | Addis Abak A Level or I  | 0 | 60  | N | Withdrawn   |
| 2569912 | M | South Wes A Level or I   | 0 | 60  | N | Withdrawn   |
| 2576298 | M | South Wes A Level or I   | 0 | 90  | N | Withdrawn   |
| 2577091 | M | Afar Regio Post Gradu    | 0 | 30  | N | Withdrawn   |
| 2581603 | M | South Regi Lower Tha     | 0 | 40  | N | Pass        |
| 2588201 | M | South Regi Lower Tha     | 0 | 60  | N | Pass        |
| 2591014 | F | Afar Regio HE Qualific   | 0 | 90  | N | Withdrawn   |
| 2598913 | M | Sidamo Re HE Qualific    | 0 | 150 | N | Fail        |
| 2602235 | M | Somalia Re Lower Tha     | 0 | 150 | N | Withdrawn   |
| 2602264 | M | Sidamo Re Post Gradu     | 0 | 120 | N | Distinction |
| 2603195 | M | South Wes A Level or I   | 0 | 60  | N | Pass        |
| 2604856 | M | South Regi Lower Tha     | 0 | 90  | N | Withdrawn   |
| 2605030 | M | Sidamo Re HE Qualific    | 0 | 150 | N | Withdrawn   |
| 2607849 | M | North Regi Lower Tha     | 0 | 90  | Y | Distinction |
| 2609908 | M | Afar Regio A Level or I  | 0 | 90  | N | Pass        |
| 2613331 | M | Somalia Re Lower Tha     | 0 | 30  | Y | Pass        |
| 2615849 | M | South Regi Lower Tha     | 0 | 90  | N | Withdrawn   |
| 2616950 | M | North Regi A Level or I  | 0 | 60  | N | Pass        |
| 2617635 | M | South Regi A Level or I  | 0 | 60  | N | Fail        |
| 2620636 | F | South Regi A Level or I  | 0 | 30  | Y | Fail        |
| 2621379 | F | South Wes A Level or I   | 0 | 90  | N | Withdrawn   |
| 2621734 | M | Sidamo Re A Level or I   | 0 | 180 | N | Withdrawn   |
| 2623263 | M | South Regi A Level or I  | 0 | 60  | N | Distinction |
| 2629436 | F | South Regi HE Qualific   | 0 | 60  | N | Fail        |
| 2631547 | F | South Wes A Level or I   | 0 | 90  | N | Withdrawn   |
| 2631703 | M | South Wes A Level or I   | 0 | 60  | Y | Distinction |
| 2634238 | M | Sidamo Re Lower Tha      | 0 | 60  | N | Fail        |
| 2639310 | M | Addis Abak A Level or I  | 0 | 90  | N | Pass        |
| 2641486 | M | North Regi Lower Tha     | 0 | 30  | N | Pass        |

|         |   |                          |   |     |   |             |
|---------|---|--------------------------|---|-----|---|-------------|
| 2644404 | M | Afar Region Post Gradu   | 0 | 30  | N | Pass        |
| 2646795 | M | Afar Region Post Gradu   | 0 | 120 | N | Withdrawn   |
| 2652523 | M | Somalia Re Lower Than    | 0 | 120 | N | Fail        |
| 2658268 | M | Sidamo Re HE Qualific    | 0 | 30  | N | Fail        |
| 2659556 | M | Addis Abak Lower Than    | 0 | 30  | N | Fail        |
| 2661696 | M | Amhara Re A Level or I   | 0 | 60  | N | Withdrawn   |
| 2665399 | F | South Wes A Level or I   | 0 | 30  | N | Distinction |
| 2668550 | F | Somalia Re A Level or I  | 0 | 90  | N | Fail        |
| 2677969 | F | Sidamo Re Post Gradu     | 0 | 60  | N | Fail        |
| 2680742 | F | Afar Region Lower Than   | 0 | 30  | Y | Pass        |
| 2681198 | M | Addis Abak Lower Than    | 0 | 90  | N | Withdrawn   |
| 2682834 | M | Oromia Re A Level or I   | 0 | 30  | N | Withdrawn   |
| 2686074 | M | Amhara Re A Level or I   | 0 | 150 | N | Withdrawn   |
| 2686578 | M | Afar Region A Level or I | 0 | 90  | N | Distinction |
| 2691267 | F | South Regi Lower Than    | 0 | 90  | N | Withdrawn   |
| 2691780 | F | Addis Abak A Level or I  | 0 | 120 | N | Withdrawn   |
| 2692327 | M | North Regi A Level or I  | 0 | 60  | N | Distinction |
| 2697181 | F | Afar Region HE Qualific  | 0 | 40  | N | Pass        |
| 2698535 | M | Tigrai Regi Lower Than   | 0 | 60  | N | Withdrawn   |
| 23698   | F | Addis Abak A Level or I  | 0 | 120 | N | Pass        |
| 25261   | F | Afar Region HE Qualific  | 0 | 60  | N | Withdrawn   |
| 27116   | M | Sidamo Re HE Qualific    | 0 | 120 | N | Distinction |
| 28787   | M | Oromia Re Lower Than     | 0 | 60  | N | Pass        |
| 28952   | F | Sidamo Re Lower Than     | 0 | 60  | N | Withdrawn   |
| 29411   | M | Somalia Re A Level or I  | 0 | 150 | N | Withdrawn   |
| 29420   | M | Tigrai Regi A Level or I | 0 | 30  | N | Pass        |
| 29639   | M | North Regi Lower Than    | 0 | 30  | N | Pass        |
| 30096   | M | Addis Abak HE Qualific   | 0 | 60  | N | Distinction |
| 30850   | F | Afar Region HE Qualific  | 0 | 120 | N | Distinction |
| 31161   | M | South Regi Post Gradu    | 0 | 105 | N | Distinction |
| 34068   | M | Afar Region Lower Than   | 0 | 30  | N | Withdrawn   |
| 35355   | M | Tigrai Regi Lower Than   | 0 | 30  | N | Withdrawn   |
| 35508   | M | South Wes A Level or I   | 0 | 30  | N | Pass        |
| 37652   | F | Sidamo Re HE Qualific    | 0 | 50  | N | Distinction |
| 42746   | F | South Regi HE Qualific   | 0 | 60  | N | Distinction |
| 46705   | M | South Wes HE Qualific    | 0 | 60  | N | Fail        |
| 48635   | M | South Regi HE Qualific   | 0 | 120 | N | Withdrawn   |
| 51576   | F | Sidamo Re Lower Than     | 1 | 60  | N | Withdrawn   |
| 53300   | M | South Regi A Level or I  | 0 | 270 | N | Distinction |
| 54062   | M | Addis Abak A Level or I  | 0 | 60  | N | Withdrawn   |
| 60809   | M | Oromia Re Lower Than     | 0 | 120 | N | Pass        |
| 61227   | F | Addis Abak Lower Than    | 0 | 30  | Y | Pass        |
| 61236   | M | South Wes HE Qualific    | 0 | 110 | N | Withdrawn   |
| 63371   | M | South Wes Lower Than     | 0 | 30  | N | Pass        |
| 67685   | M | South Regi A Level or I  | 0 | 180 | N | Withdrawn   |
| 69494   | F | Sidamo Re No Formal      | 1 | 150 | N | Withdrawn   |
| 70214   | M | Tigrai Regi Lower Than   | 0 | 90  | N | Withdrawn   |

|        |   |                           |   |     |   |             |
|--------|---|---------------------------|---|-----|---|-------------|
| 70495  | M | Afar Region Lower Than    | 0 | 60  | N | Pass        |
| 71723  | M | Amhara Region A Level or  | 0 | 30  | N | Fail        |
| 72609  | F | Tigray Region Lower Than  | 0 | 120 | N | Fail        |
| 73664  | M | Amhara Region A Level or  | 0 | 120 | N | Withdrawn   |
| 74290  | M | Afar Region Lower Than    | 1 | 30  | N | Withdrawn   |
| 76949  | M | Sidamo Region HE Qualific | 0 | 30  | N | Pass        |
| 79461  | M | Afar Region A Level or    | 1 | 60  | N | Fail        |
| 80243  | F | Amhara Region A Level or  | 0 | 90  | N | Withdrawn   |
| 80329  | M | South Region Lower Than   | 1 | 90  | N | Pass        |
| 80491  | M | Afar Region Lower Than    | 0 | 115 | N | Withdrawn   |
| 80868  | M | South West Lower Than     | 0 | 60  | N | Pass        |
| 88758  | M | North Region Post Gradu   | 1 | 150 | N | Withdrawn   |
| 91040  | F | South Region Lower Than   | 0 | 90  | N | Withdrawn   |
| 94978  | M | North Region Post Gradu   | 0 | 90  | N | Withdrawn   |
| 96864  | M | South Region HE Qualific  | 0 | 30  | N | Withdrawn   |
| 96874  | F | Oromia Region Lower Than  | 0 | 90  | N | Fail        |
| 100788 | M | Afar Region HE Qualific   | 1 | 60  | N | Distinction |
| 101700 | M | Sidamo Region A Level or  | 0 | 60  | Y | Withdrawn   |
| 102209 | F | Afar Region A Level or    | 0 | 60  | N | Withdrawn   |
| 104480 | M | North Region No Formal    | 0 | 120 | N | Fail        |
| 105168 | M | Afar Region HE Qualific   | 0 | 60  | N | Fail        |
| 105413 | M | South West HE Qualific    | 0 | 100 | N | Pass        |
| 107883 | F | Amhara Region HE Qualific | 0 | 90  | N | Withdrawn   |
| 109577 | M | Amhara Region A Level or  | 0 | 120 | N | Fail        |
| 112454 | M | Oromia Region HE Qualific | 0 | 30  | N | Pass        |
| 114367 | F | South West A Level or     | 0 | 60  | N | Pass        |
| 119310 | M | Amhara Region Lower Than  | 0 | 150 | N | Withdrawn   |
| 120236 | M | Somalia Region A Level or | 0 | 100 | N | Fail        |
| 123598 | M | Afar Region A Level or    | 1 | 60  | Y | Pass        |
| 124711 | M | Sidamo Region Lower Than  | 0 | 60  | N | Withdrawn   |
| 125777 | M | Sidamo Region HE Qualific | 0 | 30  | N | Withdrawn   |
| 126812 | F | Somalia Region A Level or | 0 | 120 | N | Withdrawn   |
| 128072 | M | Afar Region HE Qualific   | 0 | 120 | N | Withdrawn   |
| 128510 | F | Afar Region Lower Than    | 1 | 120 | N | Pass        |
| 129198 | F | Amhara Region HE Qualific | 1 | 60  | Y | Withdrawn   |
| 130671 | F | South Region Lower Than   | 0 | 90  | N | Withdrawn   |
| 131222 | M | South Region A Level or   | 0 | 60  | N | Pass        |
| 131663 | M | Afar Region A Level or    | 1 | 30  | N | Fail        |
| 131933 | M | Afar Region Post Gradu    | 1 | 30  | N | Pass        |
| 132423 | M | Sidamo Region A Level or  | 0 | 240 | N | Withdrawn   |
| 133419 | M | Amhara Region HE Qualific | 0 | 120 | N | Withdrawn   |
| 134190 | F | Afar Region A Level or    | 0 | 120 | N | Withdrawn   |
| 134982 | M | Tigray Region Lower Than  | 0 | 120 | N | Withdrawn   |
| 136335 | M | Somalia Region Lower Than | 0 | 90  | N | Withdrawn   |
| 137281 | F | South Region A Level or   | 0 | 180 | N | Fail        |
| 138861 | M | Sidamo Region HE Qualific | 0 | 90  | N | Distinction |
| 138997 | M | Afar Region A Level or    | 0 | 45  | N | Fail        |

|        |   |                          |   |     |   |             |
|--------|---|--------------------------|---|-----|---|-------------|
| 142092 | M | Amhara Re HE Qualific    | 0 | 120 | N | Distinction |
| 144745 | F | Sidamo Re HE Qualific    | 0 | 30  | Y | Pass        |
| 145114 | F | South Wes A Level or I   | 0 | 60  | N | Fail        |
| 145490 | M | Sidamo Re Lower Than     | 0 | 180 | N | Fail        |
| 145640 | M | Addis Abak A Level or I  | 0 | 60  | N | Distinction |
| 152626 | M | Amhara Re Lower Than     | 0 | 120 | N | Withdrawn   |
| 153788 | M | Amhara Re No Formal      | 1 | 60  | N | Withdrawn   |
| 155298 | M | South Regi A Level or I  | 0 | 60  | N | Pass        |
| 155956 | M | South Wes Lower Than     | 0 | 60  | N | Fail        |
| 157310 | F | Sidamo Re Lower Than     | 1 | 120 | N | Withdrawn   |
| 160536 | F | South Regi Lower Than    | 0 | 180 | Y | Pass        |
| 161781 | M | Afar Regio A Level or I  | 0 | 90  | N | Withdrawn   |
| 163067 | F | Oromia Re Lower Than     | 0 | 60  | N | Withdrawn   |
| 164968 | M | Afar Regio HE Qualific   | 0 | 90  | N | Fail        |
| 165647 | F | Afar Regio A Level or I  | 1 | 90  | N | Fail        |
| 165733 | M | Afar Regio A Level or I  | 1 | 30  | Y | Withdrawn   |
| 169297 | M | Afar Regio A Level or I  | 0 | 60  | N | Withdrawn   |
| 170030 | M | Tigrai Regi HE Qualific  | 0 | 60  | N | Pass        |
| 171896 | F | Oromia Re A Level or I   | 1 | 60  | N | Withdrawn   |
| 175638 | M | Amhara Re Lower Than     | 0 | 90  | N | Fail        |
| 178072 | M | Oromia Re A Level or I   | 1 | 150 | N | Pass        |
| 181861 | F | Oromia Re Lower Than     | 0 | 60  | N | Pass        |
| 182854 | M | South Regi A Level or I  | 0 | 80  | Y | Pass        |
| 185057 | M | South Wes HE Qualific    | 0 | 90  | N | Withdrawn   |
| 185127 | M | Sidamo Re A Level or I   | 0 | 60  | N | Pass        |
| 185451 | M | South Wes A Level or I   | 0 | 30  | N | Withdrawn   |
| 188251 | M | North Regi Lower Than    | 0 | 30  | Y | Fail        |
| 188273 | F | Addis Abak A Level or I  | 0 | 60  | N | Pass        |
| 188662 | M | Afar Regio HE Qualific   | 0 | 60  | N | Pass        |
| 190780 | M | Afar Regio HE Qualific   | 0 | 120 | N | Withdrawn   |
| 196189 | F | Afar Regio HE Qualific   | 0 | 60  | N | Pass        |
| 199261 | M | Tigrai Regi HE Qualific  | 0 | 60  | N | Withdrawn   |
| 199361 | M | Amhara Re Lower Than     | 0 | 60  | N | Fail        |
| 199760 | M | Afar Regio HE Qualific   | 0 | 60  | N | Fail        |
| 200372 | M | Afar Regio HE Qualific   | 1 | 120 | N | Withdrawn   |
| 201425 | M | Oromia Re A Level or I   | 0 | 60  | N | Pass        |
| 205218 | M | Afar Regio Lower Than    | 0 | 50  | N | Withdrawn   |
| 232072 | M | Tigrai Regi A Level or I | 0 | 60  | N | Fail        |
| 233444 | M | Sidamo Re Lower Than     | 1 | 60  | N | Withdrawn   |
| 234957 | M | Addis Abak A Level or I  | 0 | 60  | N | Withdrawn   |
| 235121 | M | Addis Abak A Level or I  | 0 | 115 | N | Withdrawn   |
| 238255 | F | Afar Regio HE Qualific   | 0 | 30  | Y | Withdrawn   |
| 240486 | M | South Regi A Level or I  | 0 | 60  | N | Fail        |
| 242636 | M | South Regi A Level or I  | 0 | 120 | N | Fail        |
| 242778 | M | Afar Regio HE Qualific   | 1 | 30  | N | Fail        |
| 243358 | F | Afar Regio A Level or I  | 0 | 90  | N | Pass        |
| 244738 | M | Sidamo Re A Level or I   | 0 | 60  | N | Distinction |

|        |   |                         |   |     |   |             |
|--------|---|-------------------------|---|-----|---|-------------|
| 245217 | M | Somalia Re A Level or I | 1 | 250 | N | Fail        |
| 245600 | M | North Regi A Level or I | 0 | 120 | N | Pass        |
| 246829 | M | Sidamo Re A Level or I  | 0 | 90  | N | Withdrawn   |
| 247304 | F | Addis Abak HE Qualific  | 0 | 60  | N | Fail        |
| 248818 | M | South Wes Lower Thar    | 0 | 60  | N | Withdrawn   |
| 253013 | F | Somalia Re A Level or I | 0 | 60  | N | Pass        |
| 253496 | M | Tigrai Regi Lower Thar  | 0 | 60  | N | Withdrawn   |
| 256532 | M | South Regi A Level or I | 1 | 30  | N | Fail        |
| 256680 | F | South Regi A Level or I | 0 | 60  | Y | Withdrawn   |
| 256867 | M | Sidamo Re A Level or I  | 0 | 60  | N | Pass        |
| 257887 | M | South Wes HE Qualific   | 0 | 60  | N | Pass        |
| 258042 | F | Oromia Re HE Qualific   | 0 | 30  | N | Withdrawn   |
| 259641 | M | North Regi A Level or I | 0 | 120 | N | Pass        |
| 260062 | M | Afar Regio HE Qualific  | 1 | 30  | N | Withdrawn   |
| 261160 | F | Tigrai Regi Lower Thar  | 0 | 150 | N | Withdrawn   |
| 262385 | F | Addis Abak Lower Thar   | 0 | 60  | N | Pass        |
| 263150 | F | Sidamo Re A Level or I  | 0 | 60  | N | Withdrawn   |
| 264151 | M | Afar Regio A Level or I | 0 | 60  | N | Fail        |
| 264715 | F | South Regi A Level or I | 0 | 60  | N | Pass        |
| 264723 | M | Somalia Re Lower Thar   | 0 | 90  | N | Withdrawn   |
| 264845 | F | South Regi HE Qualific  | 0 | 30  | N | Fail        |
| 266097 | M | Sidamo Re Lower Thar    | 0 | 30  | N | Withdrawn   |
| 266558 | M | Sidamo Re A Level or I  | 1 | 30  | Y | Fail        |
| 267619 | M | Sidamo Re Lower Thar    | 0 | 90  | N | Fail        |
| 268018 | M | Sidamo Re Lower Thar    | 1 | 60  | N | Fail        |
| 269388 | F | Afar Regio HE Qualific  | 0 | 90  | N | Fail        |
| 271526 | M | South Regi HE Qualific  | 0 | 60  | N | Withdrawn   |
| 275297 | M | North Regi HE Qualific  | 0 | 120 | N | Distinction |
| 275711 | M | Amhara Re Lower Thar    | 0 | 80  | N | Fail        |
| 275882 | M | Oromia Re A Level or I  | 0 | 60  | N | Fail        |
| 278413 | M | Sidamo Re HE Qualific   | 0 | 30  | N | Withdrawn   |
| 278600 | M | Amhara Re A Level or I  | 0 | 90  | N | Withdrawn   |
| 279879 | F | Afar Regio HE Qualific  | 0 | 30  | N | Withdrawn   |
| 279883 | M | Somalia Re A Level or I | 1 | 180 | N | Withdrawn   |
| 283618 | M | South Regi Lower Thar   | 0 | 30  | N | Withdrawn   |
| 284095 | F | South Wes HE Qualific   | 0 | 120 | N | Distinction |
| 284741 | M | Addis Abak A Level or I | 0 | 120 | N | Withdrawn   |
| 285412 | M | North Regi Lower Thar   | 0 | 60  | N | Withdrawn   |
| 285637 | F | Sidamo Re A Level or I  | 0 | 30  | N | Withdrawn   |
| 286658 | F | North Regi A Level or I | 0 | 90  | N | Distinction |
| 287897 | F | Somalia Re Lower Thar   | 0 | 120 | Y | Withdrawn   |
| 289397 | M | Oromia Re A Level or I  | 1 | 60  | Y | Fail        |
| 290043 | M | Afar Regio A Level or I | 0 | 60  | N | Fail        |
| 291156 | F | Sidamo Re A Level or I  | 0 | 90  | N | Withdrawn   |
| 291674 | F | South Regi A Level or I | 0 | 30  | N | Pass        |
| 293162 | M | Afar Regio A Level or I | 0 | 90  | N | Pass        |
| 293321 | M | South Regi A Level or I | 0 | 120 | N | Withdrawn   |

|        |   |                          |   |     |   |           |
|--------|---|--------------------------|---|-----|---|-----------|
| 293686 | M | South Wes A Level or I   | 0 | 30  | N | Pass      |
| 294112 | M | Afar Region A Level or I | 0 | 150 | N | Fail      |
| 296222 | M | Oromia Re A Level or I   | 0 | 90  | N | Withdrawn |
| 296725 | F | Afar Region Post Gradu   | 0 | 210 | N | Fail      |
| 297166 | F | Sidamo Re Lower Thar     | 0 | 60  | N | Fail      |
| 298777 | M | Amhara Re A Level or I   | 0 | 120 | N | Withdrawn |
| 300611 | M | Amhara Re HE Qualific    | 1 | 30  | N | Pass      |
| 301681 | F | North Regi A Level or I  | 0 | 60  | N | Withdrawn |
| 303218 | M | Sidamo Re HE Qualific    | 0 | 60  | N | Pass      |
| 305036 | M | Amhara Re Lower Thar     | 0 | 60  | N | Withdrawn |
| 306202 | M | Sidamo Re A Level or I   | 0 | 120 | N | Pass      |
| 307297 | M | Oromia Re HE Qualific    | 0 | 45  | N | Withdrawn |
| 307789 | F | Somalia Re A Level or I  | 0 | 120 | N | Withdrawn |
| 308953 | F | South Regi HE Qualific   | 0 | 30  | N | Fail      |
| 310280 | M | South Wes Lower Thar     | 1 | 60  | N | Fail      |
| 310765 | M | Sidamo Re HE Qualific    | 0 | 30  | N | Pass      |
| 311332 | F | South Wes Lower Thar     | 0 | 30  | N | Fail      |
| 311862 | M | South Regi A Level or I  | 0 | 60  | N | Pass      |
| 312061 | M | South Regi A Level or I  | 0 | 60  | N | Fail      |
| 314555 | F | South Regi A Level or I  | 1 | 120 | Y | Withdrawn |
| 314956 | M | Oromia Re A Level or I   | 0 | 60  | N | Pass      |
| 316091 | M | South Wes A Level or I   | 0 | 30  | N | Pass      |
| 316454 | F | Amhara Re Lower Thar     | 0 | 120 | Y | Withdrawn |
| 317801 | M | Addis Abat A Level or I  | 0 | 30  | N | Fail      |
| 319035 | M | Sidamo Re Lower Thar     | 0 | 60  | N | Withdrawn |
| 319492 | M | Addis Abat Lower Thar    | 0 | 110 | N | Withdrawn |
| 320153 | F | Sidamo Re Lower Thar     | 1 | 30  | N | Withdrawn |
| 322499 | M | Afar Region A Level or I | 0 | 120 | N | Withdrawn |
| 322641 | M | Addis Abat Lower Thar    | 0 | 60  | N | Pass      |
| 322844 | M | South Wes A Level or I   | 0 | 30  | N | Withdrawn |
| 322907 | M | Sidamo Re HE Qualific    | 0 | 30  | N | Fail      |
| 324338 | M | Sidamo Re A Level or I   | 0 | 120 | N | Withdrawn |
| 324440 | F | Sidamo Re Lower Thar     | 0 | 90  | N | Withdrawn |
| 325497 | F | South Wes A Level or I   | 1 | 60  | N | Withdrawn |
| 325518 | M | South Regi Lower Thar    | 0 | 60  | N | Withdrawn |
| 327057 | M | Oromia Re HE Qualific    | 0 | 100 | N | Pass      |
| 328123 | M | South Regi Lower Thar    | 0 | 60  | Y | Fail      |
| 328674 | F | Addis Abat Lower Thar    | 0 | 90  | N | Fail      |
| 329455 | M | Sidamo Re Post Gradu     | 0 | 60  | N | Withdrawn |
| 330453 | M | South Regi Lower Thar    | 0 | 60  | N | Pass      |
| 330952 | M | Amhara Re Lower Thar     | 0 | 270 | N | Withdrawn |
| 330966 | M | South Regi HE Qualific   | 0 | 30  | N | Withdrawn |
| 331622 | M | Somalia Re Lower Thar    | 0 | 150 | N | Withdrawn |
| 332436 | M | South Regi Lower Thar    | 0 | 60  | N | Pass      |
| 334154 | M | South Regi A Level or I  | 0 | 30  | N | Fail      |
| 334225 | F | Amhara Re Lower Thar     | 0 | 90  | N | Pass      |
| 335401 | M | South Regi Lower Thar    | 0 | 30  | N | Withdrawn |

|        |   |                            |   |     |   |             |
|--------|---|----------------------------|---|-----|---|-------------|
| 335405 | M | Addis Abat A Level or I    | 0 | 60  | N | Distinction |
| 335914 | F | South Wes A Level or I     | 0 | 30  | N | Withdrawn   |
| 336014 | M | Afar Region HE Qualific    | 0 | 120 | N | Withdrawn   |
| 336131 | M | Somalia Re A Level or I    | 0 | 60  | N | Distinction |
| 336695 | F | Somalia Re A Level or I    | 1 | 60  | N | Pass        |
| 336772 | M | South Wes Lower Than       | 0 | 30  | N | Pass        |
| 338731 | M | Sidamo Re Lower Than       | 1 | 30  | N | Fail        |
| 338983 | M | Addis Abat Lower Than      | 0 | 30  | N | Withdrawn   |
| 339235 | M | South Regi HE Qualific     | 0 | 90  | N | Distinction |
| 339824 | M | Addis Abat A Level or I    | 0 | 60  | Y | Withdrawn   |
| 340010 | F | Amhara Re Lower Than       | 0 | 30  | N | Pass        |
| 341361 | M | Sidamo Re HE Qualific      | 0 | 60  | N | Withdrawn   |
| 342799 | M | Tigrai Region Lower Than   | 1 | 30  | Y | Pass        |
| 344740 | M | Sidamo Re Lower Than       | 0 | 90  | N | Withdrawn   |
| 347809 | F | Afar Region HE Qualific    | 0 | 60  | N | Distinction |
| 348351 | M | Somalia Re Lower Than      | 0 | 60  | N | Fail        |
| 348783 | M | Amhara Re A Level or I     | 0 | 90  | N | Distinction |
| 348855 | M | Afar Region Post Gradu     | 0 | 60  | N | Pass        |
| 349093 | M | Amhara Re HE Qualific      | 0 | 60  | N | Distinction |
| 350267 | F | South Wes A Level or I     | 0 | 130 | N | Withdrawn   |
| 350929 | F | Sidamo Re A Level or I     | 0 | 60  | Y | Withdrawn   |
| 351903 | M | Amhara Re HE Qualific      | 0 | 30  | N | Withdrawn   |
| 352637 | M | Sidamo Re A Level or I     | 0 | 120 | N | Distinction |
| 353660 | M | South Regi A Level or I    | 1 | 60  | N | Withdrawn   |
| 353804 | M | Amhara Re HE Qualific      | 1 | 60  | N | Withdrawn   |
| 354688 | F | Sidamo Re Lower Than       | 0 | 60  | N | Pass        |
| 355935 | F | Sidamo Re A Level or I     | 0 | 60  | N | Pass        |
| 356297 | M | Tigrai Region Lower Than   | 0 | 60  | N | Fail        |
| 356523 | M | South Regi Lower Than      | 1 | 30  | N | Fail        |
| 357820 | M | North Regi A Level or I    | 0 | 120 | N | Withdrawn   |
| 358075 | F | South Wes A Level or I     | 1 | 90  | N | Pass        |
| 358578 | F | South Regi Lower Than      | 0 | 90  | N | Withdrawn   |
| 359657 | M | Amhara Re No Formal        | 0 | 120 | N | Withdrawn   |
| 359958 | M | South Regi A Level or I    | 0 | 60  | N | Pass        |
| 360483 | M | Tigrai Region Lower Than   | 0 | 90  | N | Withdrawn   |
| 362140 | M | Somalia Re A Level or I    | 0 | 90  | N | Pass        |
| 362548 | M | Sidamo Re Lower Than       | 0 | 30  | N | Fail        |
| 364066 | M | Sidamo Re Lower Than       | 0 | 150 | N | Withdrawn   |
| 364103 | M | Afar Region A Level or I   | 0 | 90  | N | Pass        |
| 365661 | F | Tigrai Region A Level or I | 0 | 30  | N | Pass        |
| 365701 | F | Oromia Re Lower Than       | 0 | 180 | N | Distinction |
| 366164 | F | Somalia Re A Level or I    | 0 | 30  | N | Withdrawn   |
| 366367 | M | Addis Abat Lower Than      | 0 | 30  | N | Pass        |
| 366873 | F | South Regi A Level or I    | 0 | 120 | N | Fail        |
| 367352 | M | Amhara Re HE Qualific      | 0 | 60  | N | Fail        |
| 367510 | M | Sidamo Re A Level or I     | 0 | 150 | Y | Withdrawn   |
| 367815 | M | Somalia Re A Level or I    | 0 | 120 | Y | Withdrawn   |

|        |   |                          |   |     |   |             |
|--------|---|--------------------------|---|-----|---|-------------|
| 368436 | M | Somalia Re Lower Tha     | 0 | 30  | N | Pass        |
| 369208 | M | Somalia Re Lower Tha     | 0 | 60  | N | Fail        |
| 369242 | M | Oromia Re A Level or I   | 0 | 150 | N | Withdrawn   |
| 369610 | M | Oromia Re HE Qualific    | 0 | 90  | N | Pass        |
| 370512 | M | South Wes A Level or I   | 0 | 30  | N | Pass        |
| 370839 | F | Amhara Re Lower Tha      | 0 | 120 | Y | Withdrawn   |
| 371429 | F | Amhara Re HE Qualific    | 0 | 60  | N | Withdrawn   |
| 371439 | F | South Wes A Level or I   | 0 | 30  | N | Fail        |
| 372234 | M | Addis Abak HE Qualific   | 0 | 30  | N | Pass        |
| 372577 | M | South Regi Lower Tha     | 0 | 180 | N | Withdrawn   |
| 378576 | F | Addis Abak Lower Tha     | 0 | 30  | N | Withdrawn   |
| 379042 | M | Tigrai Regi A Level or I | 0 | 60  | N | Pass        |
| 379185 | F | Addis Abak Lower Tha     | 0 | 60  | N | Fail        |
| 379255 | M | Somalia Re A Level or I  | 0 | 30  | N | Fail        |
| 379265 | M | South Regi A Level or I  | 0 | 60  | N | Fail        |
| 379406 | F | Sidamo Re, A Level or I  | 1 | 90  | N | Pass        |
| 382378 | M | Afar Regio A Level or I  | 1 | 120 | N | Withdrawn   |
| 382857 | M | South Wes Lower Tha      | 0 | 60  | N | Withdrawn   |
| 384106 | F | South Regi Lower Tha     | 0 | 120 | N | Withdrawn   |
| 385033 | M | Sidamo Re, HE Qualific   | 0 | 30  | N | Pass        |
| 385980 | M | Sidamo Re, A Level or I  | 1 | 60  | N | Withdrawn   |
| 387944 | M | Oromia Re A Level or I   | 0 | 60  | N | Fail        |
| 387963 | M | Afar Regio HE Qualific   | 0 | 30  | N | Distinction |
| 389250 | M | South Regi A Level or I  | 0 | 90  | N | Fail        |
| 389267 | M | Amhara Re A Level or I   | 0 | 60  | N | Withdrawn   |
| 391059 | M | South Regi A Level or I  | 0 | 60  | N | Fail        |
| 391466 | F | South Wes A Level or I   | 0 | 60  | N | Fail        |
| 392890 | M | South Regi A Level or I  | 0 | 60  | N | Fail        |
| 393094 | M | South Regi Lower Tha     | 0 | 150 | N | Withdrawn   |
| 393142 | F | Afar Regio Post Gradu    | 0 | 60  | N | Distinction |
| 393526 | F | Sidamo Re, Lower Tha     | 0 | 60  | Y | Withdrawn   |
| 394218 | M | North Regi A Level or I  | 0 | 120 | N | Withdrawn   |
| 394791 | F | Amhara Re Lower Tha      | 1 | 60  | Y | Pass        |
| 395757 | M | South Wes HE Qualific    | 0 | 60  | N | Pass        |
| 396631 | M | Sidamo Re, A Level or I  | 0 | 60  | N | Withdrawn   |
| 398496 | F | South Regi Lower Tha     | 0 | 120 | N | Pass        |
| 400266 | M | Sidamo Re, A Level or I  | 0 | 90  | N | Withdrawn   |
| 400958 | F | South Wes HE Qualific    | 0 | 170 | N | Fail        |
| 401011 | M | Tigrai Regi Lower Tha    | 0 | 30  | Y | Withdrawn   |
| 401258 | F | Addis Abak Lower Tha     | 0 | 210 | N | Withdrawn   |
| 402210 | F | Sidamo Re, No Formal     | 0 | 60  | N | Withdrawn   |
| 402378 | M | Sidamo Re, HE Qualific   | 0 | 40  | N | Pass        |
| 402883 | F | Tigrai Regi Lower Tha    | 0 | 30  | N | Fail        |
| 404863 | F | Afar Regio HE Qualific   | 0 | 60  | N | Fail        |
| 405125 | M | South Regi A Level or I  | 0 | 90  | N | Withdrawn   |
| 406254 | M | Somalia Re Lower Tha     | 0 | 120 | N | Withdrawn   |
| 406326 | M | Somalia Re HE Qualific   | 0 | 60  | N | Withdrawn   |



|        |   |             |             |   |     |   |             |
|--------|---|-------------|-------------|---|-----|---|-------------|
| 406698 | M | Tigrai Regi | A Level or  | 0 | 30  | N | Fail        |
| 407404 | M | South Regi  | A Level or  | 0 | 90  | N | Distinction |
| 408608 | M | Somalia Re  | A Level or  | 0 | 60  | N | Fail        |
| 409733 | M | Afar Regio  | A Level or  | 0 | 60  | N | Pass        |
| 409852 | F | South Regi  | Lower Tha   | 0 | 60  | N | Fail        |
| 409953 | M | South Regi  | A Level or  | 0 | 60  | N | Pass        |
| 410176 | F | Afar Regio  | A Level or  | 0 | 30  | N | Fail        |
| 411549 | F | Sidamo Re   | A Level or  | 0 | 120 | N | Pass        |
| 412304 | M | South Regi  | Lower Tha   | 0 | 60  | N | Withdrawn   |
| 412600 | M | Addis Aba   | A Level or  | 0 | 30  | N | Pass        |
| 412663 | M | Amhara Re   | A Level or  | 0 | 30  | N | Pass        |
| 413087 | M | Tigrai Regi | HE Qualific | 0 | 90  | N | Fail        |
| 413200 | M | Oromia Re   | HE Qualific | 0 | 60  | N | Fail        |
| 414772 | F | Sidamo Re   | A Level or  | 0 | 90  | N | Pass        |
| 415023 | M | Sidamo Re   | A Level or  | 0 | 60  | Y | Withdrawn   |
| 415631 | M | Addis Aba   | A Level or  | 0 | 60  | N | Pass        |
| 416284 | M | Afar Regio  | HE Qualific | 0 | 90  | N | Fail        |
| 416860 | F | Somalia Re  | A Level or  | 1 | 60  | N | Withdrawn   |
| 417522 | M | Addis Aba   | A Level or  | 0 | 30  | N | Pass        |
| 417724 | M | Addis Aba   | Lower Tha   | 0 | 30  | Y | Pass        |
| 418397 | M | South Regi  | Lower Tha   | 0 | 60  | Y | Pass        |
| 418971 | M | Somalia Re  | Lower Tha   | 1 | 60  | N | Fail        |
| 419024 | F | South Wes   | A Level or  | 0 | 90  | N | Withdrawn   |
| 420042 | F | Sidamo Re   | HE Qualific | 0 | 120 | N | Distinction |
| 421111 | M | Somalia Re  | Lower Tha   | 0 | 30  | N | Fail        |
| 422343 | M | South Wes   | HE Qualific | 0 | 90  | N | Pass        |
| 422542 | M | South Wes   | HE Qualific | 0 | 60  | N | Fail        |
| 422670 | M | Afar Regio  | Post Gradu  | 0 | 30  | N | Pass        |
| 422697 | M | Addis Aba   | A Level or  | 0 | 60  | N | Withdrawn   |
| 423607 | M | South Regi  | Lower Tha   | 1 | 30  | N | Fail        |
| 423622 | M | Afar Regio  | A Level or  | 0 | 120 | Y | Fail        |
| 423664 | M | South Wes   | A Level or  | 0 | 30  | N | Fail        |
| 425053 | F | Afar Regio  | A Level or  | 0 | 60  | Y | Fail        |
| 425287 | M | Sidamo Re   | Post Gradu  | 1 | 90  | N | Pass        |
| 425919 | F | Addis Aba   | Lower Tha   | 0 | 60  | N | Withdrawn   |
| 426316 | M | Afar Regio  | HE Qualific | 0 | 60  | N | Withdrawn   |
| 427390 | M | North Regi  | Lower Tha   | 0 | 120 | N | Fail        |
| 427413 | M | Afar Regio  | HE Qualific | 0 | 60  | N | Fail        |
| 429015 | M | South Wes   | A Level or  | 0 | 60  | N | Pass        |
| 430020 | M | Sidamo Re   | A Level or  | 0 | 90  | N | Fail        |
| 430487 | M | Sidamo Re   | A Level or  | 1 | 30  | N | Distinction |
| 430806 | M | Oromia Re   | HE Qualific | 1 | 70  | N | Pass        |
| 432478 | M | South Wes   | A Level or  | 0 | 30  | N | Fail        |
| 432724 | F | South Regi  | Lower Tha   | 0 | 150 | N | Distinction |
| 433508 | M | North Regi  | Lower Tha   | 0 | 60  | N | Withdrawn   |
| 433794 | M | Afar Regio  | Lower Tha   | 0 | 210 | N | Pass        |
| 434841 | M | Afar Regio  | A Level or  | 0 | 30  | N | Fail        |

|        |   |                          |   |     |   |             |
|--------|---|--------------------------|---|-----|---|-------------|
| 436900 | M | South Regi Lower Tha     | 0 | 60  | N | Fail        |
| 437482 | M | Addis Abak A Level or I  | 0 | 60  | N | Pass        |
| 437968 | M | Afar Regio HE Qualific   | 0 | 30  | N | Fail        |
| 439855 | M | Afar Regio A Level or I  | 0 | 60  | N | Withdrawn   |
| 440103 | M | Addis Abak Lower Tha     | 0 | 60  | N | Fail        |
| 440171 | F | Afar Regio HE Qualific   | 1 | 60  | N | Pass        |
| 440637 | F | Amhara Re Lower Tha      | 0 | 60  | N | Withdrawn   |
| 441024 | F | South Regi HE Qualific   | 0 | 30  | N | Withdrawn   |
| 442669 | F | Afar Regio A Level or I  | 0 | 60  | N | Pass        |
| 442823 | M | Addis Abak HE Qualific   | 0 | 30  | N | Withdrawn   |
| 442924 | M | North Regi A Level or I  | 0 | 60  | N | Distinction |
| 443837 | F | Oromia Re HE Qualific    | 0 | 120 | Y | Withdrawn   |
| 443964 | F | Afar Regio HE Qualific   | 0 | 60  | N | Distinction |
| 445114 | F | Sidamo Re A Level or I   | 0 | 210 | N | Pass        |
| 445921 | M | Sidamo Re HE Qualific    | 0 | 120 | N | Withdrawn   |
| 446439 | F | South Wes Post Gradu     | 0 | 30  | N | Pass        |
| 446479 | M | South Wes HE Qualific    | 0 | 30  | N | Withdrawn   |
| 446778 | M | South Regi A Level or I  | 0 | 180 | N | Withdrawn   |
| 447644 | F | South Wes A Level or I   | 0 | 90  | Y | Distinction |
| 447695 | M | South Wes A Level or I   | 0 | 30  | N | Withdrawn   |
| 448370 | F | South Wes A Level or I   | 0 | 60  | Y | Withdrawn   |
| 464732 | F | Afar Regio HE Qualific   | 0 | 150 | N | Fail        |
| 464780 | M | Addis Abak A Level or I  | 0 | 90  | N | Withdrawn   |
| 464924 | F | South Regi A Level or I  | 0 | 120 | N | Withdrawn   |
| 464981 | M | Afar Regio HE Qualific   | 0 | 60  | N | Distinction |
| 465281 | M | North Regi A Level or I  | 0 | 30  | N | Withdrawn   |
| 465331 | M | Sidamo Re A Level or I   | 0 | 220 | N | Pass        |
| 465577 | F | Sidamo Re A Level or I   | 0 | 60  | N | Withdrawn   |
| 465619 | M | Tigrai Regi Lower Tha    | 1 | 150 | N | Withdrawn   |
| 465732 | M | South Regi A Level or I  | 1 | 30  | N | Fail        |
| 465764 | F | Somalia Re Lower Tha     | 1 | 60  | Y | Withdrawn   |
| 465789 | M | South Regi Lower Tha     | 0 | 60  | N | Pass        |
| 465900 | M | Tigrai Regi A Level or I | 0 | 60  | N | Pass        |
| 466360 | M | South Wes HE Qualific    | 0 | 30  | N | Distinction |
| 466372 | M | Tigrai Regi Lower Tha    | 0 | 30  | N | Fail        |
| 466430 | M | South Wes No Formal      | 1 | 60  | N | Withdrawn   |
| 467144 | M | Addis Abak A Level or I  | 0 | 30  | N | Withdrawn   |
| 467381 | M | South Regi A Level or I  | 0 | 60  | N | Withdrawn   |
| 467753 | M | South Wes Post Gradu     | 1 | 30  | N | Withdrawn   |
| 468623 | F | South Regi A Level or I  | 0 | 120 | N | Withdrawn   |
| 468902 | M | South Wes Lower Tha      | 0 | 30  | N | Fail        |
| 469281 | M | North Regi Lower Tha     | 0 | 55  | N | Withdrawn   |
| 469614 | M | Tigrai Regi Lower Tha    | 1 | 90  | N | Withdrawn   |
| 469887 | M | Oromia Re A Level or I   | 0 | 60  | N | Fail        |
| 470159 | M | North Regi A Level or I  | 0 | 120 | N | Pass        |
| 470253 | M | Addis Abak A Level or I  | 0 | 90  | Y | Withdrawn   |
| 470385 | M | Addis Abak HE Qualific   | 0 | 30  | N | Pass        |

|        |   |                          |   |     |   |             |
|--------|---|--------------------------|---|-----|---|-------------|
| 470617 | M | South Wes Lower Tha      | 0 | 120 | N | Withdrawn   |
| 470914 | F | Addis Abak Lower Tha     | 0 | 150 | N | Withdrawn   |
| 471027 | F | Amhara Re HE Qualific    | 0 | 60  | N | Distinction |
| 471374 | M | Tigrai Regi A Level or I | 0 | 150 | N | Withdrawn   |
| 471580 | M | Sidamo Re Lower Tha      | 1 | 30  | N | Pass        |
| 471810 | M | Oromia Re Lower Tha      | 0 | 90  | N | Withdrawn   |
| 471977 | M | South Wes Lower Tha      | 0 | 150 | N | Withdrawn   |
| 472290 | M | North Regi A Level or I  | 0 | 60  | N | Withdrawn   |
| 472309 | F | Sidamo Re Post Gradu     | 1 | 60  | N | Fail        |
| 472616 | M | Addis Abak Lower Tha     | 0 | 150 | N | Withdrawn   |
| 472651 | M | South Wes HE Qualific    | 0 | 60  | N | Distinction |
| 472736 | M | Sidamo Re A Level or I   | 0 | 30  | N | Pass        |
| 472762 | M | South Regi A Level or I  | 0 | 180 | N | Distinction |
| 473082 | M | Afar Regi A Level or I   | 0 | 30  | N | Withdrawn   |
| 473491 | M | North Regi Lower Tha     | 0 | 60  | N | Withdrawn   |
| 474377 | M | North Regi Lower Tha     | 1 | 90  | N | Withdrawn   |
| 474495 | M | South Wes A Level or I   | 0 | 60  | N | Distinction |
| 474628 | M | South Wes HE Qualific    | 0 | 30  | N | Pass        |
| 475065 | M | Amhara Re HE Qualific    | 0 | 30  | N | Pass        |
| 475149 | M | Somalia Re HE Qualific   | 1 | 30  | N | Pass        |
| 475163 | M | Tigrai Regi Lower Tha    | 0 | 30  | N | Withdrawn   |
| 475734 | M | Amhara Re A Level or I   | 0 | 60  | N | Fail        |
| 477099 | M | Sidamo Re A Level or I   | 0 | 180 | N | Pass        |
| 477185 | M | Oromia Re A Level or I   | 0 | 90  | N | Withdrawn   |
| 477246 | M | South Regi A Level or I  | 0 | 30  | N | Withdrawn   |
| 477488 | F | North Regi HE Qualific   | 0 | 85  | N | Withdrawn   |
| 478346 | M | Oromia Re HE Qualific    | 0 | 60  | N | Pass        |
| 478496 | F | North Regi A Level or I  | 0 | 120 | N | Fail        |
| 478513 | M | Somalia Re Lower Tha     | 0 | 90  | N | Pass        |
| 478562 | M | Somalia Re A Level or I  | 0 | 60  | N | Withdrawn   |
| 479522 | F | Sidamo Re A Level or I   | 0 | 120 | N | Pass        |
| 479649 | M | South Regi A Level or I  | 0 | 60  | N | Withdrawn   |
| 479987 | M | Afar Regi HE Qualific    | 0 | 60  | N | Withdrawn   |
| 480115 | M | Oromia Re A Level or I   | 0 | 60  | N | Pass        |
| 481169 | M | Sidamo Re A Level or I   | 0 | 60  | N | Withdrawn   |
| 481314 | M | Sidamo Re A Level or I   | 0 | 30  | N | Pass        |
| 481350 | F | Sidamo Re A Level or I   | 0 | 90  | N | Withdrawn   |
| 481618 | M | Oromia Re A Level or I   | 0 | 60  | N | Withdrawn   |
| 482145 | F | Sidamo Re A Level or I   | 0 | 30  | N | Fail        |
| 482751 | F | Sidamo Re A Level or I   | 0 | 90  | N | Withdrawn   |
| 482868 | M | Oromia Re Lower Tha      | 0 | 60  | N | Withdrawn   |
| 482938 | M | Oromia Re Lower Tha      | 0 | 180 | N | Withdrawn   |
| 483108 | F | Amhara Re A Level or I   | 1 | 30  | N | Fail        |
| 483543 | M | North Regi HE Qualific   | 0 | 60  | N | Pass        |
| 483666 | F | Tigrai Regi Lower Tha    | 1 | 30  | N | Withdrawn   |
| 483793 | M | South Regi Lower Tha     | 0 | 30  | N | Fail        |
| 483858 | F | Afar Regi A Level or I   | 0 | 60  | N | Pass        |

|        |   |                           |   |     |   |             |
|--------|---|---------------------------|---|-----|---|-------------|
| 484223 | F | South Wes Lower Thar      | 0 | 90  | N | Pass        |
| 484435 | F | Afar Region HE Qualific   | 0 | 60  | N | Distinction |
| 484787 | F | Amhara Re A Level or I    | 1 | 30  | N | Withdrawn   |
| 485920 | M | Addis Abak Lower Thar     | 0 | 30  | N | Withdrawn   |
| 485949 | F | Sidamo Re HE Qualific     | 0 | 180 | N | Withdrawn   |
| 486300 | M | Somalia Re A Level or I   | 0 | 30  | N | Fail        |
| 486877 | M | Oromia Re A Level or I    | 0 | 30  | N | Withdrawn   |
| 487314 | M | Tigrai Region HE Qualific | 0 | 60  | N | Pass        |
| 487570 | F | Addis Abak A Level or I   | 1 | 60  | N | Withdrawn   |
| 488192 | F | North Regi A Level or I   | 0 | 120 | N | Withdrawn   |
| 488617 | M | South Wes Lower Thar      | 0 | 60  | N | Fail        |
| 488755 | F | Addis Abak HE Qualific    | 0 | 30  | N | Withdrawn   |
| 489990 | F | Amhara Re Lower Thar      | 0 | 150 | N | Withdrawn   |
| 490313 | M | Addis Abak A Level or I   | 0 | 30  | N | Withdrawn   |
| 490394 | M | Oromia Re Lower Thar      | 0 | 30  | N | Pass        |
| 490443 | M | Amhara Re A Level or I    | 0 | 60  | N | Withdrawn   |
| 490542 | F | Addis Abak Lower Thar     | 0 | 180 | N | Withdrawn   |
| 491033 | M | Afar Region Lower Thar    | 0 | 120 | N | Withdrawn   |
| 491926 | M | Tigrai Region Lower Thar  | 0 | 90  | Y | Withdrawn   |
| 492020 | M | Sidamo Re HE Qualific     | 0 | 30  | N | Withdrawn   |
| 492357 | M | Somalia Re A Level or I   | 1 | 30  | N | Pass        |
| 492537 | M | Sidamo Re Lower Thar      | 0 | 30  | Y | Fail        |
| 492613 | F | Sidamo Re A Level or I    | 0 | 60  | N | Withdrawn   |
| 493416 | M | South Wes Lower Thar      | 0 | 90  | N | Pass        |
| 494211 | M | Addis Abak A Level or I   | 0 | 60  | N | Withdrawn   |
| 494498 | F | Amhara Re A Level or I    | 0 | 90  | N | Withdrawn   |
| 494829 | F | Amhara Re Lower Thar      | 0 | 60  | N | Withdrawn   |
| 494911 | F | South Regi Lower Thar     | 0 | 30  | N | Withdrawn   |
| 495438 | F | Addis Abak Lower Thar     | 0 | 30  | N | Pass        |
| 496355 | M | Sidamo Re A Level or I    | 0 | 60  | N | Pass        |
| 496530 | M | Somalia Re Lower Thar     | 0 | 60  | N | Fail        |
| 496845 | M | South Regi A Level or I   | 0 | 150 | N | Pass        |
| 497536 | F | South Wes Lower Thar      | 0 | 120 | N | Withdrawn   |
| 497955 | F | South Wes A Level or I    | 0 | 30  | N | Withdrawn   |
| 498225 | M | South Regi HE Qualific    | 1 | 30  | N | Withdrawn   |
| 498236 | M | North Regi HE Qualific    | 0 | 60  | N | Pass        |
| 498459 | F | Addis Abak HE Qualific    | 0 | 90  | N | Distinction |
| 498602 | M | Afar Region A Level or I  | 0 | 90  | N | Fail        |
| 498828 | M | Addis Abak A Level or I   | 0 | 120 | N | Pass        |
| 499420 | M | South Regi A Level or I   | 0 | 60  | N | Distinction |
| 499683 | M | South Wes Lower Thar      | 0 | 60  | N | Withdrawn   |
| 499703 | F | South Wes A Level or I    | 0 | 120 | N | Distinction |
| 499813 | M | North Regi A Level or I   | 0 | 150 | N | Distinction |
| 499848 | F | South Regi Lower Thar     | 0 | 90  | N | Fail        |
| 500031 | F | South Wes Lower Thar      | 0 | 60  | N | Withdrawn   |
| 500189 | M | Afar Region A Level or I  | 1 | 30  | N | Fail        |
| 500339 | M | Amhara Re Lower Thar      | 0 | 120 | N | Withdrawn   |

|        |   |                          |   |     |   |             |
|--------|---|--------------------------|---|-----|---|-------------|
| 500440 | M | Sidamo Re A Level or I   | 0 | 90  | N | Withdrawn   |
| 501146 | M | Oromia Re HE Qualific    | 0 | 60  | N | Fail        |
| 501617 | F | South Wes Lower Thar     | 0 | 30  | N | Distinction |
| 501867 | M | Sidamo Re HE Qualific    | 1 | 60  | N | Pass        |
| 501897 | M | South Regi A Level or I  | 0 | 150 | N | Withdrawn   |
| 502004 | M | Amhara Re A Level or I   | 0 | 60  | N | Withdrawn   |
| 502353 | M | South Wes Lower Thar     | 0 | 120 | N | Withdrawn   |
| 502356 | M | Tigrai Regi A Level or I | 0 | 60  | N | Pass        |
| 502766 | F | South Wes A Level or I   | 0 | 60  | N | Distinction |
| 503400 | M | Amhara Re A Level or I   | 0 | 30  | N | Withdrawn   |
| 503457 | F | Afar Regioi A Level or I | 0 | 30  | N | Pass        |
| 503610 | M | South Wes A Level or I   | 1 | 120 | N | Pass        |
| 503710 | M | South Regi HE Qualific   | 0 | 120 | N | Pass        |
| 503779 | M | Sidamo Re Lower Thar     | 0 | 60  | Y | Distinction |
| 504363 | M | Sidamo Re A Level or I   | 0 | 150 | N | Distinction |
| 505108 | M | Amhara Re HE Qualific    | 0 | 60  | N | Pass        |
| 505403 | M | Sidamo Re A Level or I   | 0 | 60  | N | Withdrawn   |
| 505700 | M | South Regi Lower Thar    | 0 | 60  | N | Withdrawn   |
| 505722 | M | Amhara Re A Level or I   | 0 | 30  | N | Fail        |
| 505815 | M | Sidamo Re A Level or I   | 1 | 30  | Y | Withdrawn   |
| 505930 | M | North Regi A Level or I  | 0 | 60  | N | Fail        |
| 505967 | F | Somalia Re Lower Thar    | 1 | 120 | N | Withdrawn   |
| 506144 | M | Afar Regioi A Level or I | 1 | 30  | N | Pass        |
| 506543 | M | Oromia Re Lower Thar     | 0 | 60  | N | Pass        |
| 506705 | M | South Wes A Level or I   | 0 | 120 | N | Pass        |
| 507031 | M | Afar Regioi A Level or I | 0 | 120 | N | Withdrawn   |
| 507344 | M | South Regi A Level or I  | 0 | 60  | N | Pass        |
| 507671 | F | Amhara Re A Level or I   | 1 | 30  | N | Withdrawn   |
| 508244 | F | Sidamo Re HE Qualific    | 0 | 30  | N | Withdrawn   |
| 508295 | F | Addis Abak A Level or I  | 0 | 150 | Y | Withdrawn   |
| 508637 | M | Afar Regioi HE Qualific  | 0 | 60  | N | Distinction |
| 508775 | M | North Regi A Level or I  | 0 | 90  | N | Withdrawn   |
| 509148 | M | Oromia Re HE Qualific    | 0 | 120 | N | Withdrawn   |
| 509150 | M | North Regi Lower Thar    | 0 | 60  | N | Withdrawn   |
| 509177 | M | Sidamo Re Lower Thar     | 0 | 90  | N | Withdrawn   |
| 509710 | M | Afar Regioi Lower Thar   | 0 | 30  | N | Fail        |
| 510054 | M | North Regi A Level or I  | 0 | 30  | N | Pass        |
| 510070 | F | Afar Regioi HE Qualific  | 1 | 30  | N | Withdrawn   |
| 510266 | M | Afar Regioi A Level or I | 0 | 60  | N | Fail        |
| 510401 | M | Sidamo Re HE Qualific    | 0 | 90  | N | Withdrawn   |
| 510460 | M | North Regi HE Qualific   | 0 | 60  | N | Withdrawn   |
| 510846 | M | South Wes Lower Thar     | 0 | 60  | N | Withdrawn   |
| 511258 | M | Afar Regioi HE Qualific  | 0 | 30  | N | Pass        |
| 511350 | M | Sidamo Re Lower Thar     | 0 | 90  | Y | Fail        |
| 511612 | M | Somalia Re Lower Thar    | 0 | 90  | N | Withdrawn   |
| 511859 | M | South Wes Lower Thar     | 0 | 120 | N | Withdrawn   |
| 512257 | M | Sidamo Re HE Qualific    | 0 | 30  | N | Fail        |

|        |   |                          |   |     |   |             |
|--------|---|--------------------------|---|-----|---|-------------|
| 512259 | M | South Regi Lower Tha     | 0 | 60  | N | Pass        |
| 512330 | F | Addis Abak Lower Tha     | 0 | 150 | Y | Fail        |
| 512546 | M | Afar Regioi A Level or I | 0 | 30  | N | Withdrawn   |
| 512852 | F | Addis Abak A Level or I  | 0 | 60  | N | Distinction |
| 512861 | F | South Wes A Level or I   | 0 | 90  | N | Withdrawn   |
| 513918 | M | North Regi Lower Tha     | 0 | 60  | Y | Withdrawn   |
| 513969 | F | Oromia Re A Level or I   | 1 | 120 | N | Pass        |
| 514504 | M | Somalia Re Lower Tha     | 0 | 30  | N | Withdrawn   |
| 515125 | M | Sidamo Re A Level or I   | 0 | 150 | N | Fail        |
| 515426 | F | South Regi A Level or I  | 0 | 60  | N | Fail        |
| 515491 | M | South Wes HE Qualific    | 0 | 60  | N | Pass        |
| 515734 | F | North Regi A Level or I  | 1 | 30  | N | Fail        |
| 515857 | M | Somalia Re Lower Tha     | 0 | 60  | N | Pass        |
| 517223 | M | Sidamo Re A Level or I   | 0 | 120 | N | Fail        |
| 517416 | M | Tigrai Regi A Level or I | 0 | 60  | N | Distinction |
| 518134 | M | Afar Regioi Lower Tha    | 0 | 60  | N | Fail        |
| 518359 | M | South Wes Post Gradu     | 0 | 60  | N | Distinction |
| 518503 | M | Oromia Re Lower Tha      | 0 | 60  | N | Withdrawn   |
| 519057 | F | South Wes A Level or I   | 0 | 120 | N | Pass        |
| 519116 | F | South Regi A Level or I  | 0 | 120 | N | Withdrawn   |
| 519506 | F | South Wes Lower Tha      | 0 | 60  | N | Pass        |
| 519684 | M | Afar Regioi HE Qualific  | 0 | 30  | N | Withdrawn   |
| 519879 | F | South Regi A Level or I  | 0 | 60  | N | Withdrawn   |
| 520077 | M | South Regi Lower Tha     | 0 | 90  | N | Fail        |
| 520332 | M | Afar Regioi A Level or I | 1 | 60  | N | Pass        |
| 520750 | M | Tigrai Regi HE Qualific  | 0 | 90  | N | Fail        |
| 520854 | F | South Regi Lower Tha     | 0 | 120 | N | Withdrawn   |
| 521115 | M | Amhara Re HE Qualific    | 0 | 120 | N | Pass        |
| 521292 | M | South Regi HE Qualific   | 0 | 60  | N | Pass        |
| 522004 | F | Oromia Re Lower Tha      | 0 | 60  | N | Withdrawn   |
| 522257 | M | Sidamo Re Lower Tha      | 0 | 60  | N | Pass        |
| 522525 | M | Somalia Re Lower Tha     | 0 | 90  | N | Pass        |
| 522534 | F | Addis Abak A Level or I  | 0 | 30  | N | Withdrawn   |
| 522708 | M | South Wes A Level or I   | 0 | 90  | N | Fail        |
| 522754 | M | South Wes A Level or I   | 0 | 60  | Y | Pass        |
| 522924 | M | Sidamo Re HE Qualific    | 0 | 30  | N | Withdrawn   |
| 523239 | M | Tigrai Regi Lower Tha    | 1 | 30  | N | Fail        |
| 523334 | M | Addis Abak Lower Tha     | 0 | 30  | N | Withdrawn   |
| 523762 | M | Sidamo Re A Level or I   | 0 | 120 | N | Pass        |
| 523817 | M | South Regi A Level or I  | 0 | 90  | N | Withdrawn   |
| 523872 | M | South Regi Lower Tha     | 0 | 60  | N | Pass        |
| 523944 | M | Amhara Re A Level or I   | 0 | 60  | Y | Pass        |
| 524019 | M | South Regi Lower Tha     | 0 | 60  | N | Withdrawn   |
| 524170 | M | Sidamo Re HE Qualific    | 0 | 30  | N | Withdrawn   |
| 524276 | M | Afar Regioi HE Qualific  | 0 | 30  | N | Withdrawn   |
| 524431 | F | South Regi A Level or I  | 0 | 60  | N | Withdrawn   |
| 524851 | M | Sidamo Re Lower Tha      | 0 | 30  | N | Withdrawn   |

|        |   |                            |   |     |   |             |
|--------|---|----------------------------|---|-----|---|-------------|
| 525060 | F | Afar Region A Level or     | 0 | 90  | N | Withdrawn   |
| 526124 | M | Amhara Region Lower Than   | 0 | 30  | N | Withdrawn   |
| 526132 | M | Somalia Region A Level or  | 0 | 30  | Y | Withdrawn   |
| 526235 | M | Sidamo Region HE Qualific  | 1 | 90  | N | Fail        |
| 526441 | M | Oromia Region Lower Than   | 0 | 150 | N | Fail        |
| 526601 | M | South Region Lower Than    | 0 | 60  | N | Withdrawn   |
| 526741 | F | Somalia Region A Level or  | 0 | 30  | N | Fail        |
| 527958 | M | South Region Lower Than    | 0 | 90  | N | Withdrawn   |
| 528021 | M | South Region Lower Than    | 1 | 30  | N | Withdrawn   |
| 528290 | F | South Region A Level or    | 0 | 30  | N | Withdrawn   |
| 528506 | M | South Region HE Qualific   | 0 | 60  | N | Pass        |
| 528700 | M | South Region HE Qualific   | 0 | 30  | N | Withdrawn   |
| 529179 | M | Tigray Region Lower Than   | 0 | 90  | N | Withdrawn   |
| 529309 | M | Somalia Region A Level or  | 0 | 90  | N | Withdrawn   |
| 529512 | M | Afar Region A Level or     | 0 | 60  | N | Withdrawn   |
| 529550 | F | Addis Ababa A Level or     | 0 | 30  | N | Withdrawn   |
| 529723 | M | South West A Level or      | 0 | 90  | N | Withdrawn   |
| 529975 | M | South West Lower Than      | 0 | 30  | N | Fail        |
| 530663 | F | South Region A Level or    | 0 | 150 | N | Pass        |
| 531674 | F | South Region Lower Than    | 0 | 60  | N | Withdrawn   |
| 531896 | M | South Region A Level or    | 0 | 30  | N | Fail        |
| 532440 | M | Oromia Region Lower Than   | 1 | 60  | N | Pass        |
| 532565 | M | Sidamo Region Lower Than   | 1 | 30  | N | Fail        |
| 532649 | M | Afar Region HE Qualific    | 0 | 30  | N | Fail        |
| 532744 | M | Addis Ababa Lower Than     | 0 | 120 | N | Withdrawn   |
| 532846 | M | South West Lower Than      | 0 | 60  | N | Withdrawn   |
| 533006 | F | Amhara Region A Level or   | 0 | 120 | N | Withdrawn   |
| 533512 | F | Addis Ababa Lower Than     | 0 | 60  | N | Fail        |
| 533689 | F | Tigray Region A Level or   | 0 | 30  | N | Fail        |
| 534074 | M | Addis Ababa HE Qualific    | 1 | 30  | N | Withdrawn   |
| 534093 | M | Sidamo Region A Level or   | 0 | 60  | N | Pass        |
| 534203 | M | Sidamo Region Lower Than   | 0 | 60  | N | Withdrawn   |
| 534733 | M | South Region HE Qualific   | 0 | 60  | N | Pass        |
| 535161 | M | South Region Lower Than    | 0 | 60  | N | Fail        |
| 535259 | M | Somalia Region HE Qualific | 0 | 30  | N | Fail        |
| 535648 | F | Amhara Region A Level or   | 0 | 30  | N | Pass        |
| 536276 | M | Oromia Region Lower Than   | 0 | 60  | N | Pass        |
| 536736 | M | Sidamo Region HE Qualific  | 0 | 120 | N | Withdrawn   |
| 536825 | M | Oromia Region A Level or   | 0 | 30  | N | Withdrawn   |
| 537654 | M | North Region A Level or    | 1 | 30  | Y | Pass        |
| 537811 | F | Somalia Region A Level or  | 0 | 120 | Y | Distinction |
| 539408 | M | South Region Lower Than    | 0 | 30  | N | Withdrawn   |
| 539451 | M | Sidamo Region Lower Than   | 0 | 60  | N | Fail        |
| 539727 | M | South West A Level or      | 0 | 90  | N | Withdrawn   |
| 540509 | M | Oromia Region Lower Than   | 1 | 60  | N | Withdrawn   |
| 540694 | M | South West A Level or      | 0 | 60  | N | Withdrawn   |
| 540885 | M | South Region Lower Than    | 0 | 240 | N | Withdrawn   |

|        |   |                         |   |     |   |             |
|--------|---|-------------------------|---|-----|---|-------------|
| 541040 | M | Somalia Re Lower Than   | 0 | 60  | N | Withdrawn   |
| 541482 | M | Addis Abak Lower Than   | 0 | 60  | N | Fail        |
| 541531 | M | Oromia Re A Level or    | 0 | 60  | N | Pass        |
| 541538 | M | Sidamo Re A Level or    | 0 | 30  | N | Pass        |
| 541708 | M | South Wes A Level or    | 0 | 30  | N | Distinction |
| 542054 | M | Amhara Re A Level or    | 0 | 30  | N | Withdrawn   |
| 542134 | M | Tigrai Regi HE Qualific | 0 | 60  | N | Withdrawn   |
| 542167 | M | Afar Regio HE Qualific  | 0 | 60  | Y | Pass        |
| 542180 | F | South Wes Lower Than    | 0 | 300 | Y | Withdrawn   |
| 542557 | M | Afar Regio HE Qualific  | 0 | 60  | N | Distinction |
| 543417 | M | Somalia Re A Level or   | 1 | 60  | N | Withdrawn   |
| 543653 | M | Sidamo Re A Level or    | 0 | 60  | N | Fail        |
| 543788 | F | South Regi A Level or   | 0 | 60  | N | Pass        |
| 543953 | F | Oromia Re Lower Than    | 0 | 90  | N | Withdrawn   |
| 544052 | M | Afar Regio A Level or   | 0 | 60  | N | Pass        |
| 544071 | M | South Regi Lower Than   | 0 | 150 | N | Withdrawn   |
| 544267 | M | South Wes A Level or    | 0 | 30  | N | Pass        |
| 544271 | M | South Regi A Level or   | 0 | 90  | N | Withdrawn   |
| 544319 | M | South Regi A Level or   | 0 | 30  | N | Withdrawn   |
| 544720 | M | South Regi A Level or   | 0 | 30  | N | Fail        |
| 545118 | M | Amhara Re A Level or    | 0 | 90  | N | Fail        |
| 545255 | M | Addis Abak A Level or   | 0 | 60  | N | Fail        |
| 545493 | M | Afar Regio HE Qualific  | 0 | 90  | N | Withdrawn   |
| 545704 | M | Oromia Re Lower Than    | 0 | 60  | Y | Pass        |
| 545758 | M | South Regi Lower Than   | 1 | 30  | N | Fail        |
| 546139 | F | North Regi A Level or   | 0 | 30  | N | Withdrawn   |
| 546400 | F | Afar Regio A Level or   | 1 | 60  | N | Withdrawn   |
| 546634 | F | North Regi A Level or   | 0 | 60  | N | Withdrawn   |
| 546654 | M | Somalia Re A Level or   | 0 | 150 | Y | Pass        |
| 546934 | M | Sidamo Re Lower Than    | 0 | 60  | N | Withdrawn   |
| 547128 | M | Tigrai Regi A Level or  | 0 | 180 | Y | Withdrawn   |
| 547153 | M | Tigrai Regi A Level or  | 0 | 60  | N | Fail        |
| 547506 | M | Oromia Re A Level or    | 0 | 90  | N | Withdrawn   |
| 547612 | F | South Regi Lower Than   | 0 | 30  | N | Pass        |
| 548922 | M | Afar Regio Lower Than   | 0 | 60  | N | Withdrawn   |
| 548926 | F | Addis Abak A Level or   | 1 | 60  | N | Fail        |
| 549113 | M | Sidamo Re A Level or    | 0 | 60  | N | Withdrawn   |
| 549439 | M | Afar Regio Lower Than   | 0 | 30  | N | Fail        |
| 549677 | F | Amhara Re A Level or    | 0 | 30  | N | Withdrawn   |
| 549687 | F | Somalia Re Lower Than   | 0 | 30  | N | Pass        |
| 549706 | F | South Regi HE Qualific  | 0 | 60  | N | Pass        |
| 549769 | F | Afar Regio A Level or   | 0 | 110 | N | Withdrawn   |
| 549783 | M | Addis Abak Lower Than   | 0 | 30  | N | Distinction |
| 549888 | F | Afar Regio A Level or   | 0 | 150 | N | Withdrawn   |
| 549922 | M | Oromia Re A Level or    | 0 | 120 | N | Withdrawn   |
| 550393 | M | Sidamo Re Lower Than    | 0 | 90  | N | Fail        |
| 550545 | F | Afar Regio A Level or   | 1 | 90  | N | Withdrawn   |



|        |   |                          |   |     |   |             |
|--------|---|--------------------------|---|-----|---|-------------|
| 550702 | F | South Regi A Level or I  | 0 | 210 | N | Distinction |
| 550814 | M | South Wes Lower Thar     | 0 | 120 | N | Pass        |
| 551158 | M | Afar Regio HE Qualific   | 0 | 30  | N | Withdrawn   |
| 551214 | M | Oromia Re A Level or I   | 0 | 60  | N | Pass        |
| 551220 | M | North Regi HE Qualific   | 0 | 120 | N | Fail        |
| 551332 | F | Amhara Re Lower Thar     | 0 | 120 | N | Fail        |
| 551397 | M | South Wes A Level or I   | 0 | 30  | N | Pass        |
| 551589 | M | Amhara Re Lower Thar     | 0 | 120 | N | Withdrawn   |
| 551772 | M | Addis Abak HE Qualific   | 0 | 30  | N | Fail        |
| 551791 | M | South Regi A Level or I  | 0 | 30  | N | Withdrawn   |
| 552220 | M | South Wes HE Qualific    | 0 | 60  | N | Fail        |
| 552255 | M | Amhara Re A Level or I   | 0 | 90  | N | Withdrawn   |
| 552475 | F | Tigrai Regio HE Qualific | 0 | 90  | N | Withdrawn   |
| 552498 | F | Afar Regio A Level or I  | 1 | 60  | N | Pass        |
| 552666 | M | South Regi A Level or I  | 0 | 90  | N | Withdrawn   |
| 552965 | M | Somalia Re Lower Thar    | 0 | 120 | N | Distinction |
| 553599 | M | Sidamo Re A Level or I   | 0 | 60  | N | Distinction |
| 553719 | M | South Regi A Level or I  | 0 | 90  | N | Distinction |
| 553741 | M | South Regi A Level or I  | 1 | 120 | N | Pass        |
| 554065 | M | North Regi Lower Thar    | 0 | 90  | N | Distinction |
| 554266 | M | Afar Regio Lower Thar    | 0 | 30  | N | Withdrawn   |
| 554444 | F | South Regi Lower Thar    | 0 | 60  | N | Withdrawn   |
| 554459 | M | Amhara Re A Level or I   | 0 | 60  | N | Fail        |
| 554691 | M | Amhara Re Lower Thar     | 0 | 60  | Y | Withdrawn   |
| 554761 | M | Afar Regio A Level or I  | 1 | 60  | N | Fail        |
| 555498 | M | Addis Abak HE Qualific   | 0 | 60  | N | Pass        |
| 555760 | M | Tigrai Regio HE Qualific | 0 | 120 | N | Distinction |
| 555884 | M | Somalia Re A Level or I  | 0 | 60  | N | Pass        |
| 555989 | M | Addis Abak A Level or I  | 0 | 90  | N | Distinction |
| 556140 | M | South Regi Lower Thar    | 0 | 60  | N | Pass        |
| 556251 | M | Amhara Re A Level or I   | 0 | 60  | N | Pass        |
| 556440 | M | Afar Regio HE Qualific   | 0 | 120 | Y | Fail        |
| 556450 | M | Afar Regio A Level or I  | 0 | 60  | Y | Fail        |
| 556476 | F | Sidamo Re Lower Thar     | 0 | 120 | Y | Fail        |
| 556521 | M | Addis Abak A Level or I  | 1 | 30  | Y | Withdrawn   |
| 556645 | M | Addis Abak A Level or I  | 1 | 60  | N | Fail        |
| 556788 | M | North Regi Lower Thar    | 1 | 480 | N | Withdrawn   |
| 556824 | M | Afar Regio HE Qualific   | 0 | 60  | N | Distinction |
| 557608 | F | Oromia Re A Level or I   | 0 | 90  | N | Withdrawn   |
| 557650 | M | Sidamo Re Lower Thar     | 0 | 30  | N | Pass        |
| 557700 | M | North Regi Post Gradu    | 1 | 30  | N | Pass        |
| 557959 | M | Sidamo Re HE Qualific    | 0 | 60  | N | Pass        |
| 558440 | F | South Wes Lower Thar     | 0 | 120 | Y | Withdrawn   |
| 558463 | M | South Regi Lower Thar    | 0 | 30  | N | Pass        |
| 558839 | M | Afar Regio A Level or I  | 0 | 30  | N | Pass        |
| 559225 | M | Afar Regio A Level or I  | 0 | 60  | N | Fail        |
| 559518 | M | Addis Abak Lower Thar    | 0 | 30  | N | Fail        |

|        |   |                          |   |     |   |             |
|--------|---|--------------------------|---|-----|---|-------------|
| 559672 | M | North Regi A Level or I  | 0 | 60  | N | Withdrawn   |
| 559863 | M | South Wes Lower Thar     | 0 | 30  | N | Distinction |
| 559912 | M | Somalia Re Lower Thar    | 1 | 60  | N | Withdrawn   |
| 560064 | M | South Wes Lower Thar     | 0 | 30  | N | Fail        |
| 560065 | M | Addis Abak A Level or I  | 0 | 60  | N | Pass        |
| 560399 | M | South Regi HE Qualific   | 0 | 90  | N | Withdrawn   |
| 560554 | M | Amhara Re A Level or I   | 0 | 30  | N | Fail        |
| 560723 | M | Afar Regioi Lower Thar   | 0 | 30  | N | Withdrawn   |
| 560784 | M | South Regi Lower Thar    | 1 | 30  | N | Fail        |
| 560879 | F | Amhara Re A Level or I   | 0 | 60  | N | Pass        |
| 561009 | F | Afar Regioi A Level or I | 0 | 120 | Y | Pass        |
| 561113 | F | South Regi Lower Thar    | 0 | 120 | N | Withdrawn   |
| 561195 | M | Afar Regioi Lower Thar   | 0 | 60  | N | Pass        |
| 561208 | M | Addis Abak A Level or I  | 0 | 60  | N | Pass        |
| 561476 | M | Addis Abak Lower Thar    | 0 | 30  | N | Pass        |
| 561560 | M | Somalia Re Lower Thar    | 0 | 120 | N | Fail        |
| 561826 | F | Sidamo Re HE Qualific    | 0 | 30  | N | Pass        |
| 561848 | M | Sidamo Re A Level or I   | 0 | 120 | N | Fail        |
| 561913 | M | Afar Regioi HE Qualific  | 0 | 60  | N | Pass        |
| 562437 | M | Oromia Re A Level or I   | 0 | 60  | N | Withdrawn   |
| 562884 | F | Sidamo Re HE Qualific    | 0 | 60  | N | Pass        |
| 563016 | M | Sidamo Re HE Qualific    | 0 | 60  | N | Pass        |
| 563051 | M | South Wes A Level or I   | 0 | 60  | N | Pass        |
| 563230 | M | Sidamo Re HE Qualific    | 0 | 90  | N | Withdrawn   |
| 563321 | M | South Regi HE Qualific   | 0 | 60  | N | Pass        |
| 563430 | F | Sidamo Re Lower Thar     | 0 | 60  | N | Withdrawn   |
| 563920 | M | Oromia Re Lower Thar     | 0 | 30  | N | Pass        |
| 563951 | M | Amhara Re Lower Thar     | 0 | 150 | Y | Withdrawn   |
| 563967 | M | South Regi A Level or I  | 1 | 60  | N | Withdrawn   |
| 564213 | M | Sidamo Re Lower Thar     | 0 | 60  | N | Pass        |
| 564356 | F | Sidamo Re A Level or I   | 0 | 30  | N | Withdrawn   |
| 564649 | M | Afar Regioi A Level or I | 0 | 30  | N | Fail        |
| 564714 | M | Addis Abak HE Qualific   | 0 | 60  | Y | Fail        |
| 564931 | F | South Wes Lower Thar     | 0 | 90  | N | Withdrawn   |
| 565066 | M | Oromia Re Lower Thar     | 0 | 90  | N | Withdrawn   |
| 565109 | M | South Regi Lower Thar    | 0 | 210 | N | Withdrawn   |
| 565605 | F | Afar Regioi Lower Thar   | 0 | 60  | N | Pass        |
| 565707 | F | Somalia Re Lower Thar    | 0 | 150 | Y | Withdrawn   |
| 565743 | M | Amhara Re Lower Thar     | 0 | 120 | N | Pass        |
| 565840 | M | Tigrai Regi A Level or I | 0 | 210 | N | Withdrawn   |
| 565883 | M | Afar Regioi Lower Thar   | 1 | 30  | N | Withdrawn   |
| 566135 | M | Amhara Re A Level or I   | 0 | 30  | N | Pass        |
| 566447 | F | Tigrai Regi HE Qualific  | 0 | 30  | N | Distinction |
| 566464 | M | South Regi A Level or I  | 0 | 60  | N | Pass        |
| 566664 | M | Sidamo Re A Level or I   | 1 | 60  | N | Withdrawn   |
| 566694 | F | South Regi Lower Thar    | 0 | 90  | N | Withdrawn   |
| 566938 | M | Sidamo Re Lower Thar     | 0 | 60  | N | Distinction |

|        |   |                         |   |     |   |             |
|--------|---|-------------------------|---|-----|---|-------------|
| 566979 | M | Amhara Re Lower Tha     | 0 | 60  | N | Pass        |
| 567152 | M | Sidamo Re HE Qualific   | 0 | 120 | N | Withdrawn   |
| 567304 | M | Sidamo Re Lower Tha     | 0 | 60  | N | Pass        |
| 567451 | M | Amhara Re Lower Tha     | 0 | 30  | N | Withdrawn   |
| 567597 | F | Addis Abat A Level or I | 0 | 90  | Y | Pass        |
| 567719 | F | Amhara Re A Level or I  | 0 | 60  | N | Fail        |
| 567888 | M | Oromia Re HE Qualific   | 0 | 60  | N | Distinction |
| 568307 | F | Amhara Re Lower Tha     | 0 | 30  | N | Withdrawn   |
| 568596 | M | Afar Regio A Level or I | 0 | 60  | N | Withdrawn   |
| 568691 | F | Sidamo Re A Level or I  | 0 | 60  | N | Distinction |
| 568948 | M | Amhara Re A Level or I  | 0 | 90  | N | Distinction |
| 569049 | F | Afar Regio A Level or I | 0 | 150 | N | Withdrawn   |
| 569132 | M | Oromia Re Lower Tha     | 0 | 60  | N | Withdrawn   |
| 569277 | M | Somalia Re Lower Tha    | 0 | 60  | N | Pass        |
| 569625 | M | Afar Regio A Level or I | 0 | 60  | N | Fail        |
| 569944 | M | Sidamo Re No Formal     | 0 | 90  | N | Distinction |
| 570453 | M | Amhara Re A Level or I  | 0 | 60  | N | Pass        |
| 570491 | M | South Regi A Level or I | 0 | 90  | N | Pass        |
| 570671 | M | South Wes A Level or I  | 1 | 90  | Y | Withdrawn   |
| 570717 | M | Amhara Re Lower Tha     | 0 | 90  | Y | Withdrawn   |
| 570732 | M | Somalia Re Lower Tha    | 0 | 60  | N | Distinction |
| 570757 | M | South Wes Post Gradu    | 0 | 30  | N | Pass        |
| 570895 | M | South Regi Lower Tha    | 0 | 30  | N | Fail        |
| 570954 | M | Afar Regio Lower Tha    | 1 | 60  | Y | Withdrawn   |
| 570985 | M | Amhara Re A Level or I  | 0 | 60  | N | Pass        |
| 570997 | F | Addis Abat A Level or I | 0 | 120 | N | Withdrawn   |
| 571131 | M | Tigrai Regi Lower Tha   | 0 | 60  | N | Pass        |
| 571610 | M | South Regi HE Qualific  | 0 | 30  | N | Withdrawn   |
| 571765 | M | Oromia Re No Formal     | 0 | 60  | N | Distinction |
| 571808 | M | South Regi A Level or I | 1 | 120 | N | Distinction |
| 571833 | M | Somalia Re Lower Tha    | 0 | 30  | N | Pass        |
| 571921 | F | Afar Regio HE Qualific  | 0 | 60  | N | Pass        |
| 571950 | M | Amhara Re No Formal     | 0 | 270 | N | Withdrawn   |
| 571962 | M | South Wes Lower Tha     | 0 | 60  | N | Fail        |
| 572011 | M | Amhara Re A Level or I  | 0 | 60  | N | Fail        |
| 572098 | F | Sidamo Re A Level or I  | 0 | 60  | N | Pass        |
| 572154 | M | Afar Regio HE Qualific  | 1 | 60  | N | Withdrawn   |
| 572231 | F | Afar Regio Lower Tha    | 0 | 60  | Y | Pass        |
| 572250 | M | Addis Abat A Level or I | 0 | 90  | N | Withdrawn   |
| 572339 | M | Amhara Re A Level or I  | 0 | 30  | N | Withdrawn   |
| 572396 | M | South Wes Lower Tha     | 0 | 120 | N | Distinction |
| 572431 | M | South Wes A Level or I  | 0 | 90  | N | Pass        |
| 572537 | M | South Regi A Level or I | 0 | 60  | N | Distinction |
| 572584 | M | Sidamo Re Lower Tha     | 0 | 60  | N | Withdrawn   |
| 572588 | M | Oromia Re A Level or I  | 0 | 60  | N | Withdrawn   |
| 572589 | F | Somalia Re Lower Tha    | 0 | 90  | N | Withdrawn   |
| 572599 | M | South Regi Lower Tha    | 0 | 60  | Y | Withdrawn   |

|        |   |                         |   |     |   |             |
|--------|---|-------------------------|---|-----|---|-------------|
| 572659 | M | Sidamo Re Lower Tha     | 0 | 60  | N | Withdrawn   |
| 572735 | M | Addis Abak Lower Tha    | 0 | 60  | N | Pass        |
| 572746 | M | South Regi Lower Tha    | 0 | 30  | N | Withdrawn   |
| 572754 | M | Afar Regio A Level or I | 0 | 90  | Y | Withdrawn   |
| 572783 | M | Amhara Re HE Qualific   | 0 | 60  | N | Pass        |
| 572816 | M | Somalia Re Lower Tha    | 0 | 90  | N | Withdrawn   |
| 572874 | M | Sidamo Re Lower Tha     | 0 | 90  | N | Pass        |
| 572919 | F | Somalia Re No Formal    | 0 | 60  | N | Pass        |
| 573093 | M | Oromia Re A Level or I  | 0 | 60  | N | Withdrawn   |
| 573153 | M | Sidamo Re Lower Tha     | 1 | 120 | N | Withdrawn   |
| 573473 | M | South Regi Lower Tha    | 0 | 60  | N | Withdrawn   |
| 573481 | M | South Wes A Level or I  | 0 | 120 | N | Withdrawn   |
| 573689 | M | Somalia Re Lower Tha    | 0 | 90  | N | Withdrawn   |
| 573858 | M | Oromia Re A Level or I  | 0 | 30  | N | Pass        |
| 573920 | M | South Regi A Level or I | 0 | 30  | N | Withdrawn   |
| 573924 | M | Addis Abak A Level or I | 0 | 60  | N | Pass        |
| 574056 | M | South Regi Lower Tha    | 0 | 150 | N | Withdrawn   |
| 574259 | M | South Wes HE Qualific   | 0 | 30  | N | Pass        |
| 574310 | F | Sidamo Re A Level or I  | 0 | 90  | N | Distinction |
| 574325 | M | Addis Abak HE Qualific  | 0 | 30  | N | Fail        |
| 574507 | M | South Regi Lower Tha    | 0 | 30  | N | Withdrawn   |
| 574508 | M | Amhara Re HE Qualific   | 0 | 60  | N | Withdrawn   |
| 574523 | M | Oromia Re A Level or I  | 1 | 60  | N | Withdrawn   |
| 574586 | M | South Wes A Level or I  | 1 | 60  | N | Withdrawn   |
| 574590 | M | South Wes A Level or I  | 0 | 60  | N | Pass        |
| 574637 | M | South Regi A Level or I | 0 | 30  | N | Pass        |
| 574705 | M | North Regi Lower Tha    | 0 | 60  | N | Distinction |
| 574720 | M | Amhara Re A Level or I  | 0 | 60  | N | Pass        |
| 574891 | F | South Regi A Level or I | 0 | 90  | N | Withdrawn   |
| 574928 | F | Sidamo Re A Level or I  | 0 | 120 | N | Pass        |
| 575039 | M | South Regi A Level or I | 0 | 60  | N | Fail        |
| 575047 | M | South Regi A Level or I | 0 | 30  | N | Fail        |
| 575162 | M | Afar Regio HE Qualific  | 0 | 60  | N | Fail        |
| 575258 | M | Addis Abak Lower Tha    | 0 | 120 | N | Withdrawn   |
| 575265 | M | Sidamo Re Lower Tha     | 0 | 90  | N | Withdrawn   |
| 575398 | M | Amhara Re Lower Tha     | 0 | 90  | N | Withdrawn   |
| 575553 | M | South Wes A Level or I  | 0 | 60  | N | Withdrawn   |
| 575763 | M | Amhara Re A Level or I  | 0 | 30  | N | Withdrawn   |
| 575766 | M | South Regi Lower Tha    | 0 | 60  | N | Pass        |
| 575798 | M | South Wes A Level or I  | 0 | 90  | N | Pass        |
| 576233 | M | Oromia Re A Level or I  | 0 | 60  | N | Fail        |
| 576251 | M | South Wes A Level or I  | 0 | 60  | N | Distinction |
| 576433 | M | Addis Abak A Level or I | 0 | 30  | N | Distinction |
| 576439 | M | Addis Abak Lower Tha    | 0 | 60  | N | Pass        |
| 576453 | M | Afar Regio HE Qualific  | 0 | 90  | N | Distinction |
| 576541 | F | South Regi A Level or I | 0 | 60  | N | Fail        |
| 576568 | M | South Wes A Level or I  | 0 | 60  | N | Pass        |

|        |   |                          |   |     |   |             |
|--------|---|--------------------------|---|-----|---|-------------|
| 576791 | M | North Regi HE Qualific   | 0 | 30  | N | Pass        |
| 576876 | M | Oromia Re Lower Thar     | 0 | 120 | N | Withdrawn   |
| 577148 | M | Sidamo Re A Level or I   | 0 | 60  | N | Withdrawn   |
| 577149 | M | Tigrai Regi A Level or I | 0 | 90  | N | Withdrawn   |
| 577235 | M | Amhara Re Lower Thar     | 0 | 30  | N | Fail        |
| 577279 | M | Addis Abak HE Qualific   | 0 | 60  | N | Distinction |
| 577427 | M | Afar Regi A Level or I   | 1 | 30  | N | Fail        |
| 577458 | M | Oromia Re Lower Thar     | 0 | 60  | N | Fail        |
| 577460 | M | North Regi HE Qualific   | 0 | 60  | N | Withdrawn   |
| 577551 | M | North Regi A Level or I  | 0 | 60  | N | Withdrawn   |
| 577566 | M | North Regi HE Qualific   | 0 | 90  | N | Pass        |
| 578000 | M | Sidamo Re Lower Thar     | 0 | 30  | N | Fail        |
| 578026 | M | Sidamo Re Lower Thar     | 0 | 60  | N | Withdrawn   |
| 578634 | M | South Regi Lower Thar    | 0 | 90  | N | Withdrawn   |
| 578815 | M | North Regi Post Gradu    | 0 | 150 | N | Pass        |
| 578820 | M | South Regi A Level or I  | 0 | 60  | N | Withdrawn   |
| 578823 | M | Addis Abak A Level or I  | 1 | 30  | N | Withdrawn   |
| 579052 | M | North Regi A Level or I  | 0 | 60  | N | Withdrawn   |
| 579176 | F | Afar Regi HE Qualific    | 0 | 60  | N | Withdrawn   |
| 579278 | M | South Wes Lower Thar     | 0 | 60  | N | Withdrawn   |
| 579283 | M | South Regi Lower Thar    | 0 | 90  | N | Withdrawn   |
| 579325 | M | Amhara Re Lower Thar     | 0 | 90  | N | Withdrawn   |
| 579362 | F | North Regi Lower Thar    | 0 | 60  | N | Withdrawn   |
| 579583 | M | South Wes Lower Thar     | 0 | 30  | N | Pass        |
| 579614 | M | North Regi Lower Thar    | 0 | 60  | N | Pass        |
| 580342 | M | Somalia Re Lower Thar    | 0 | 60  | N | Pass        |
| 580384 | M | Afar Regi Post Gradu     | 0 | 60  | N | Distinction |
| 580657 | M | Addis Abak A Level or I  | 0 | 90  | N | Withdrawn   |
| 580709 | M | South Regi A Level or I  | 0 | 60  | N | Withdrawn   |
| 580714 | M | Sidamo Re A Level or I   | 0 | 60  | N | Pass        |
| 580722 | M | South Regi A Level or I  | 1 | 60  | Y | Withdrawn   |
| 580798 | M | South Wes Lower Thar     | 0 | 60  | N | Pass        |
| 580845 | M | Afar Regi HE Qualific    | 0 | 120 | N | Pass        |
| 580916 | F | North Regi A Level or I  | 0 | 30  | N | Pass        |
| 581123 | M | South Regi A Level or I  | 1 | 30  | N | Pass        |
| 581179 | M | Oromia Re Lower Thar     | 0 | 60  | N | Pass        |
| 581247 | M | Afar Regi A Level or I   | 0 | 30  | N | Pass        |
| 581288 | M | Amhara Re HE Qualific    | 0 | 90  | N | Withdrawn   |
| 581316 | F | Afar Regi A Level or I   | 0 | 60  | N | Pass        |
| 581410 | M | Oromia Re A Level or I   | 0 | 90  | Y | Withdrawn   |
| 581552 | M | Sidamo Re A Level or I   | 0 | 90  | N | Pass        |
| 581656 | M | South Wes A Level or I   | 0 | 60  | Y | Pass        |
| 581676 | M | South Regi Lower Thar    | 0 | 60  | N | Fail        |
| 581708 | M | Sidamo Re A Level or I   | 0 | 30  | N | Withdrawn   |
| 581770 | M | Addis Abak A Level or I  | 0 | 90  | N | Withdrawn   |
| 581914 | M | Afar Regi HE Qualific    | 0 | 90  | N | Withdrawn   |
| 582320 | F | South Regi A Level or I  | 0 | 60  | N | Pass        |

|        |   |                          |   |     |   |             |
|--------|---|--------------------------|---|-----|---|-------------|
| 582340 | M | North Regi Lower Tha     | 0 | 60  | N | Withdrawn   |
| 582395 | M | Tigrai Regi Lower Tha    | 1 | 120 | N | Withdrawn   |
| 582514 | M | South Regi A Level or I  | 0 | 30  | N | Withdrawn   |
| 582530 | M | Amhara Re HE Qualific    | 0 | 150 | N | Fail        |
| 582550 | F | Amhara Re A Level or I   | 0 | 60  | Y | Pass        |
| 582651 | M | Addis Abak HE Qualific   | 0 | 60  | N | Withdrawn   |
| 582723 | M | North Regi Lower Tha     | 1 | 30  | N | Withdrawn   |
| 583288 | F | Sidamo Re A Level or I   | 0 | 120 | N | Withdrawn   |
| 583293 | M | Tigrai Regi A Level or I | 0 | 60  | N | Distinction |
| 583704 | F | Sidamo Re A Level or I   | 0 | 90  | N | Pass        |
| 583993 | M | South Regi A Level or I  | 0 | 60  | Y | Fail        |
| 584077 | M | Amhara Re A Level or I   | 1 | 90  | N | Withdrawn   |
| 584281 | F | South Regi A Level or I  | 0 | 90  | N | Fail        |
| 584386 | M | Somalia Re A Level or I  | 0 | 30  | N | Fail        |
| 584414 | M | Tigrai Regi A Level or I | 0 | 30  | N | Withdrawn   |
| 584443 | F | Afar Regi Lower Tha      | 0 | 150 | Y | Withdrawn   |
| 584553 | M | Amhara Re A Level or I   | 0 | 60  | N | Withdrawn   |
| 584711 | M | Sidamo Re HE Qualific    | 0 | 60  | N | Withdrawn   |
| 584771 | M | Afar Regi HE Qualific    | 1 | 60  | N | Pass        |
| 584926 | M | Sidamo Re A Level or I   | 0 | 30  | N | Pass        |
| 585098 | M | South Regi A Level or I  | 0 | 30  | N | Pass        |
| 585134 | M | Tigrai Regi HE Qualific  | 0 | 60  | N | Pass        |
| 585154 | M | Sidamo Re A Level or I   | 0 | 60  | N | Pass        |
| 585222 | F | South Regi A Level or I  | 0 | 30  | N | Fail        |
| 585359 | F | Sidamo Re A Level or I   | 0 | 60  | N | Pass        |
| 585422 | M | Sidamo Re A Level or I   | 0 | 60  | N | Withdrawn   |
| 585433 | M | Afar Regi HE Qualific    | 1 | 60  | N | Withdrawn   |
| 585526 | M | Amhara Re Lower Tha      | 0 | 150 | N | Withdrawn   |
| 585643 | M | Amhara Re A Level or I   | 0 | 90  | N | Withdrawn   |
| 585662 | M | Amhara Re A Level or I   | 0 | 120 | N | Withdrawn   |
| 585769 | F | Afar Regi Post Gradu     | 1 | 60  | N | Withdrawn   |
| 585812 | M | South Regi Lower Tha     | 0 | 90  | N | Fail        |
| 585911 | F | South Regi A Level or I  | 0 | 60  | N | Withdrawn   |
| 586046 | M | South Regi HE Qualific   | 0 | 30  | N | Fail        |
| 586047 | M | South Regi A Level or I  | 0 | 30  | N | Fail        |
| 586088 | F | Afar Regi A Level or I   | 0 | 90  | N | Pass        |
| 586227 | M | Addis Abak Lower Tha     | 0 | 60  | N | Withdrawn   |
| 586233 | M | Addis Abak Lower Tha     | 0 | 90  | Y | Withdrawn   |
| 586261 | M | Sidamo Re Lower Tha      | 0 | 60  | N | Pass        |
| 586476 | F | Oromia Re A Level or I   | 1 | 90  | N | Pass        |
| 586497 | M | Somalia Re A Level or I  | 0 | 60  | N | Distinction |
| 586526 | M | South Regi A Level or I  | 1 | 60  | N | Withdrawn   |
| 586550 | M | Sidamo Re HE Qualific    | 0 | 120 | N | Withdrawn   |
| 586594 | M | Addis Abak A Level or I  | 0 | 90  | N | Pass        |
| 586668 | M | South Regi A Level or I  | 0 | 30  | N | Pass        |
| 586750 | M | South Wes Lower Tha      | 0 | 30  | N | Fail        |
| 586762 | M | Sidamo Re Lower Tha      | 0 | 60  | N | Pass        |

|        |   |                          |   |     |   |             |
|--------|---|--------------------------|---|-----|---|-------------|
| 586781 | M | South Regi HE Qualific   | 0 | 60  | N | Distinction |
| 586808 | M | South Regi Lower Thar    | 0 | 60  | N | Pass        |
| 586838 | M | Somalia Re Lower Thar    | 0 | 30  | N | Pass        |
| 586921 | M | Addis Abak Lower Thar    | 1 | 60  | N | Withdrawn   |
| 587008 | M | South Regi A Level or I  | 0 | 60  | N | Pass        |
| 587082 | M | South Wes Lower Thar     | 0 | 60  | N | Fail        |
| 587122 | M | Afar Regioi Lower Thar   | 1 | 60  | N | Withdrawn   |
| 587195 | M | South Wes Lower Thar     | 0 | 30  | Y | Withdrawn   |
| 587244 | F | South Wes Lower Thar     | 0 | 180 | N | Fail        |
| 587377 | M | Somalia Re A Level or I  | 0 | 30  | Y | Fail        |
| 587391 | M | South Wes A Level or I   | 0 | 60  | N | Distinction |
| 587547 | M | Sidamo Re, A Level or I  | 0 | 90  | N | Withdrawn   |
| 587550 | M | South Regi HE Qualific   | 0 | 60  | N | Withdrawn   |
| 587641 | M | South Wes A Level or I   | 0 | 30  | N | Fail        |
| 587793 | F | Amhara Re Lower Thar     | 0 | 90  | N | Withdrawn   |
| 587881 | M | Sidamo Re, A Level or I  | 0 | 60  | N | Fail        |
| 587900 | F | Sidamo Re, A Level or I  | 0 | 60  | N | Withdrawn   |
| 588033 | M | Sidamo Re, A Level or I  | 0 | 30  | N | Withdrawn   |
| 588100 | M | Afar Regioi A Level or I | 0 | 60  | N | Pass        |
| 588170 | F | South Wes A Level or I   | 0 | 60  | N | Withdrawn   |
| 588178 | M | South Wes A Level or I   | 0 | 60  | N | Withdrawn   |
| 588261 | M | South Regi HE Qualific   | 0 | 120 | N | Withdrawn   |
| 588482 | M | North Regi A Level or I  | 0 | 60  | N | Pass        |
| 588493 | M | Afar Regioi HE Qualific  | 0 | 60  | N | Fail        |
| 588556 | M | Sidamo Re, A Level or I  | 0 | 60  | N | Fail        |
| 588566 | M | Somalia Re A Level or I  | 0 | 30  | N | Fail        |
| 588765 | M | South Wes A Level or I   | 0 | 30  | N | Pass        |
| 588824 | F | Afar Regioi HE Qualific  | 0 | 60  | Y | Withdrawn   |
| 588842 | M | Sidamo Re, A Level or I  | 0 | 120 | N | Pass        |
| 589223 | M | Sidamo Re, A Level or I  | 0 | 30  | N | Withdrawn   |
| 589327 | M | Afar Regioi HE Qualific  | 1 | 30  | N | Withdrawn   |
| 589438 | F | South Wes HE Qualific    | 0 | 60  | N | Pass        |
| 589441 | M | South Regi Lower Thar    | 0 | 90  | N | Withdrawn   |
| 589463 | F | Oromia Re HE Qualific    | 0 | 120 | N | Pass        |
| 589523 | M | Addis Abak Lower Thar    | 0 | 60  | Y | Fail        |
| 589565 | F | South Regi Lower Thar    | 0 | 60  | N | Distinction |
| 589634 | M | South Wes A Level or I   | 0 | 90  | N | Distinction |
| 589723 | F | South Regi A Level or I  | 0 | 30  | N | Withdrawn   |
| 589778 | M | Oromia Re A Level or I   | 0 | 30  | Y | Pass        |
| 589782 | M | Amhara Re HE Qualific    | 0 | 60  | N | Distinction |
| 589956 | M | South Regi Lower Thar    | 0 | 60  | N | Distinction |
| 590397 | F | South Wes A Level or I   | 0 | 60  | N | Pass        |
| 590519 | F | Amhara Re A Level or I   | 0 | 60  | N | Fail        |
| 590676 | M | Oromia Re No Formal      | 0 | 60  | N | Pass        |
| 590886 | M | Amhara Re HE Qualific    | 0 | 90  | N | Withdrawn   |
| 590974 | M | Sidamo Re Lower Thar     | 1 | 30  | N | Fail        |
| 591083 | F | North Regi Lower Thar    | 0 | 30  | N | Fail        |

|        |   |                          |   |     |   |             |
|--------|---|--------------------------|---|-----|---|-------------|
| 591230 | M | Sidamo Re HE Qualific    | 0 | 30  | N | Pass        |
| 591593 | M | Oromia Re Lower Tha      | 0 | 90  | Y | Withdrawn   |
| 591619 | F | South Wes HE Qualific    | 1 | 30  | N | Withdrawn   |
| 591655 | M | North Regi Lower Tha     | 1 | 90  | N | Fail        |
| 591733 | F | South Regi Lower Tha     | 0 | 60  | N | Withdrawn   |
| 591869 | M | North Regi HE Qualific   | 0 | 30  | N | Withdrawn   |
| 591891 | M | Oromia Re A Level or I   | 0 | 60  | Y | Pass        |
| 592051 | M | Afar Regio HE Qualific   | 1 | 90  | Y | Pass        |
| 592093 | M | South Regi Lower Tha     | 1 | 60  | N | Pass        |
| 592124 | M | Tigrai Regi Lower Tha    | 0 | 30  | N | Withdrawn   |
| 592259 | M | Sidamo Re A Level or I   | 1 | 90  | N | Withdrawn   |
| 592310 | F | Amhara Re HE Qualific    | 0 | 30  | N | Distinction |
| 592338 | F | South Regi A Level or I  | 0 | 60  | N | Pass        |
| 592372 | M | Sidamo Re Lower Tha      | 0 | 30  | N | Fail        |
| 592494 | F | South Regi A Level or I  | 0 | 30  | N | Pass        |
| 592625 | M | Tigrai Regi A Level or I | 0 | 90  | N | Pass        |
| 592657 | F | Sidamo Re Lower Tha      | 0 | 120 | Y | Withdrawn   |
| 592731 | M | Addis Abak Lower Tha     | 0 | 30  | N | Withdrawn   |
| 592787 | M | Somalia Re Lower Tha     | 0 | 30  | N | Withdrawn   |
| 592805 | M | Sidamo Re A Level or I   | 0 | 30  | N | Withdrawn   |
| 592950 | F | Oromia Re A Level or I   | 0 | 60  | Y | Withdrawn   |
| 592951 | F | Tigrai Regi Lower Tha    | 0 | 120 | N | Withdrawn   |
| 592997 | M | Sidamo Re HE Qualific    | 0 | 30  | N | Fail        |
| 593022 | M | Amhara Re A Level or I   | 0 | 60  | N | Pass        |
| 593607 | M | Somalia Re A Level or I  | 0 | 30  | N | Withdrawn   |
| 593657 | M | Addis Abak Lower Tha     | 0 | 30  | N | Distinction |
| 594052 | M | Amhara Re A Level or I   | 1 | 30  | N | Withdrawn   |
| 594214 | M | Afar Regio Lower Tha     | 0 | 60  | N | Withdrawn   |
| 594319 | M | Afar Regio HE Qualific   | 0 | 120 | N | Withdrawn   |
| 594326 | M | South Regi A Level or I  | 1 | 60  | N | Pass        |
| 594399 | M | Afar Regio Lower Tha     | 0 | 60  | N | Withdrawn   |
| 594419 | F | Amhara Re Lower Tha      | 1 | 60  | N | Pass        |
| 594627 | M | Amhara Re A Level or I   | 0 | 120 | N | Withdrawn   |
| 594909 | M | Amhara Re A Level or I   | 0 | 30  | N | Pass        |
| 595106 | M | South Wes A Level or I   | 0 | 60  | N | Distinction |
| 595495 | M | Addis Abak A Level or I  | 0 | 60  | Y | Pass        |
| 595514 | M | Somalia Re A Level or I  | 1 | 30  | N | Pass        |
| 595553 | M | North Regi HE Qualific   | 0 | 90  | N | Withdrawn   |
| 595655 | M | South Regi Lower Tha     | 0 | 60  | N | Withdrawn   |
| 595746 | M | South Regi Lower Tha     | 0 | 90  | N | Withdrawn   |
| 595938 | M | Somalia Re HE Qualific   | 0 | 30  | N | Withdrawn   |
| 595988 | F | Sidamo Re A Level or I   | 0 | 60  | N | Withdrawn   |
| 596052 | M | Oromia Re Lower Tha      | 0 | 120 | Y | Withdrawn   |
| 596245 | M | Oromia Re A Level or I   | 0 | 120 | N | Withdrawn   |
| 596332 | M | Somalia Re A Level or I  | 0 | 60  | N | Pass        |
| 596441 | M | South Regi A Level or I  | 0 | 60  | N | Withdrawn   |
| 596620 | F | Somalia Re Lower Tha     | 0 | 120 | Y | Withdrawn   |



|        |   |                          |   |     |   |             |
|--------|---|--------------------------|---|-----|---|-------------|
| 596711 | F | Addis Abat A Level or I  | 0 | 60  | N | Pass        |
| 596789 | M | Tigrai Regi A Level or I | 0 | 90  | N | Withdrawn   |
| 596812 | F | Oromia Re Lower Than     | 0 | 90  | N | Withdrawn   |
| 596845 | M | Addis Abat A Level or I  | 0 | 60  | N | Pass        |
| 596846 | M | South Wes A Level or I   | 0 | 90  | N | Pass        |
| 596855 | M | South Wes Lower Than     | 0 | 60  | N | Withdrawn   |
| 596860 | M | Amhara Re HE Qualific    | 0 | 90  | N | Withdrawn   |
| 596931 | M | South Regi HE Qualific   | 0 | 30  | N | Withdrawn   |
| 596981 | M | Afar Regio A Level or I  | 0 | 60  | N | Fail        |
| 597052 | F | Addis Abat A Level or I  | 0 | 90  | Y | Pass        |
| 597166 | M | Amhara Re HE Qualific    | 0 | 60  | N | Withdrawn   |
| 597319 | M | South Wes Lower Than     | 0 | 30  | N | Withdrawn   |
| 597365 | M | Amhara Re A Level or I   | 0 | 60  | N | Pass        |
| 597433 | F | South Regi A Level or I  | 0 | 120 | N | Pass        |
| 597436 | F | Amhara Re A Level or I   | 0 | 60  | N | Distinction |
| 597560 | M | Somalia Re Lower Than    | 1 | 60  | N | Withdrawn   |
| 597755 | M | Tigrai Regi A Level or I | 0 | 60  | N | Distinction |
| 597948 | M | South Wes HE Qualific    | 0 | 60  | N | Withdrawn   |
| 598028 | M | Sidamo Re HE Qualific    | 0 | 60  | N | Withdrawn   |
| 598102 | M | Sidamo Re HE Qualific    | 0 | 60  | N | Pass        |
| 598299 | M | Sidamo Re A Level or I   | 0 | 60  | N | Pass        |
| 598478 | F | Afar Regio A Level or I  | 0 | 30  | N | Withdrawn   |
| 598501 | M | South Wes A Level or I   | 0 | 60  | N | Pass        |
| 598665 | M | South Regi Lower Than    | 0 | 30  | N | Pass        |
| 598713 | F | Addis Abat A Level or I  | 0 | 60  | N | Pass        |
| 598751 | M | Sidamo Re A Level or I   | 0 | 30  | N | Pass        |
| 598887 | M | South Regi A Level or I  | 0 | 120 | N | Withdrawn   |
| 598963 | M | Amhara Re HE Qualific    | 0 | 30  | N | Pass        |
| 598983 | M | Afar Regio A Level or I  | 0 | 60  | N | Pass        |
| 599084 | M | Oromia Re Lower Than     | 0 | 60  | N | Withdrawn   |
| 599109 | M | Oromia Re A Level or I   | 0 | 60  | N | Pass        |
| 599169 | M | Afar Regio A Level or I  | 0 | 120 | Y | Pass        |
| 599176 | M | Tigrai Regi HE Qualific  | 0 | 60  | N | Distinction |
| 599297 | M | Sidamo Re A Level or I   | 0 | 120 | N | Fail        |
| 599341 | M | Afar Regio A Level or I  | 1 | 60  | N | Withdrawn   |
| 599398 | M | South Regi Lower Than    | 0 | 60  | N | Fail        |
| 599429 | M | Sidamo Re A Level or I   | 0 | 90  | N | Withdrawn   |
| 599452 | M | North Regi HE Qualific   | 1 | 90  | N | Pass        |
| 599461 | F | Sidamo Re A Level or I   | 0 | 90  | N | Withdrawn   |
| 599491 | M | South Regi HE Qualific   | 0 | 30  | N | Fail        |
| 599663 | M | North Regi HE Qualific   | 0 | 60  | N | Withdrawn   |
| 599740 | M | Sidamo Re A Level or I   | 0 | 60  | N | Pass        |
| 599976 | M | Oromia Re Lower Than     | 0 | 30  | N | Fail        |
| 600042 | F | Addis Abat A Level or I  | 0 | 90  | N | Withdrawn   |
| 600067 | M | Addis Abat A Level or I  | 0 | 60  | N | Distinction |
| 600175 | M | Amhara Re HE Qualific    | 0 | 90  | N | Withdrawn   |
| 600350 | M | South Wes A Level or I   | 0 | 60  | N | Withdrawn   |

|        |   |                         |   |     |   |             |
|--------|---|-------------------------|---|-----|---|-------------|
| 600509 | M | Amhara Re A Level or l  | 1 | 30  | N | Fail        |
| 600535 | M | Afar Regio Lower Tha    | 0 | 30  | N | Fail        |
| 600547 | M | Amhara Re A Level or l  | 1 | 30  | N | Withdrawn   |
| 600796 | F | South Wes Lower Tha     | 0 | 60  | N | Pass        |
| 600814 | M | South Wes Lower Tha     | 1 | 90  | N | Fail        |
| 600869 | M | South Regi Lower Tha    | 0 | 60  | N | Withdrawn   |
| 600898 | M | South Regi A Level or l | 0 | 90  | N | Withdrawn   |
| 601043 | M | North Regi A Level or l | 0 | 30  | N | Withdrawn   |
| 601054 | M | Sidamo Re A Level or l  | 1 | 60  | N | Withdrawn   |
| 601082 | M | Tigrai Regi Lower Tha   | 0 | 60  | N | Fail        |
| 601234 | M | Amhara Re A Level or l  | 0 | 60  | N | Pass        |
| 601388 | F | Oromia Re A Level or l  | 0 | 60  | N | Pass        |
| 601431 | M | South Wes A Level or l  | 0 | 60  | N | Fail        |
| 601517 | M | South Regi A Level or l | 0 | 30  | N | Fail        |
| 601566 | M | Amhara Re A Level or l  | 0 | 60  | N | Withdrawn   |
| 601567 | M | Addis Abak Lower Tha    | 0 | 60  | N | Fail        |
| 601653 | M | North Regi HE Qualific  | 0 | 60  | N | Withdrawn   |
| 601735 | M | North Regi Lower Tha    | 0 | 60  | N | Withdrawn   |
| 601753 | M | Tigrai Regi Lower Tha   | 0 | 90  | N | Withdrawn   |
| 601857 | F | South Regi Lower Tha    | 0 | 120 | Y | Withdrawn   |
| 601956 | M | Addis Abak A Level or l | 0 | 60  | N | Withdrawn   |
| 602030 | M | Afar Regio Lower Tha    | 1 | 30  | N | Fail        |
| 602123 | M | South Regi Lower Tha    | 0 | 90  | N | Fail        |
| 602151 | M | Addis Abak A Level or l | 0 | 60  | N | Pass        |
| 602288 | M | South Regi A Level or l | 1 | 60  | N | Pass        |
| 602533 | M | South Regi A Level or l | 0 | 60  | Y | Distinction |
| 602585 | M | Afar Regio A Level or l | 1 | 60  | N | Withdrawn   |
| 602683 | F | Afar Regio HE Qualific  | 0 | 60  | N | Distinction |
| 602806 | F | Addis Abak A Level or l | 0 | 150 | N | Withdrawn   |
| 602827 | M | South Regi Lower Tha    | 0 | 60  | N | Withdrawn   |
| 602856 | F | Addis Abak HE Qualific  | 0 | 60  | N | Withdrawn   |
| 602973 | F | Afar Regio Lower Tha    | 0 | 60  | N | Pass        |
| 603049 | M | Afar Regio HE Qualific  | 0 | 60  | N | Pass        |
| 603129 | M | South Regi A Level or l | 0 | 60  | N | Pass        |
| 603179 | M | Oromia Re Lower Tha     | 1 | 60  | N | Pass        |
| 603302 | M | South Wes A Level or l  | 0 | 90  | Y | Withdrawn   |
| 603325 | F | Oromia Re A Level or l  | 0 | 60  | Y | Distinction |
| 603503 | M | Sidamo Re A Level or l  | 0 | 30  | N | Pass        |
| 603529 | M | Afar Regio A Level or l | 0 | 90  | N | Pass        |
| 603560 | F | South Wes Lower Tha     | 0 | 30  | N | Withdrawn   |
| 603620 | F | Sidamo Re A Level or l  | 0 | 60  | N | Pass        |
| 603728 | M | Amhara Re HE Qualific   | 0 | 30  | N | Fail        |
| 603979 | F | Afar Regio HE Qualific  | 0 | 90  | N | Withdrawn   |
| 604057 | F | Afar Regio A Level or l | 0 | 120 | N | Distinction |
| 604164 | M | South Regi A Level or l | 1 | 60  | N | Pass        |
| 604340 | M | South Regi A Level or l | 0 | 60  | N | Withdrawn   |
| 604379 | M | Addis Abak A Level or l | 0 | 90  | N | Withdrawn   |

|        |   |                          |   |     |   |             |
|--------|---|--------------------------|---|-----|---|-------------|
| 604694 | M | Sidamo Re Lower Tha      | 0 | 60  | N | Withdrawn   |
| 604825 | F | Oromia Re Lower Tha      | 0 | 120 | N | Withdrawn   |
| 604906 | M | South Regi Lower Tha     | 1 | 30  | N | Fail        |
| 604991 | M | North Regi A Level or I  | 0 | 60  | N | Fail        |
| 605111 | M | Oromia Re Lower Tha      | 0 | 30  | N | Pass        |
| 605264 | M | South Regi Lower Tha     | 0 | 60  | N | Withdrawn   |
| 605367 | M | Sidamo Re A Level or I   | 0 | 90  | N | Fail        |
| 605459 | M | South Wes Lower Tha      | 0 | 150 | N | Withdrawn   |
| 605468 | F | South Wes A Level or I   | 0 | 60  | Y | Withdrawn   |
| 605540 | M | Sidamo Re A Level or I   | 0 | 90  | Y | Distinction |
| 605545 | M | Oromia Re Post Gradu     | 0 | 60  | N | Fail        |
| 605666 | M | Somalia Re HE Qualific   | 0 | 60  | N | Pass        |
| 605840 | M | North Regi A Level or I  | 1 | 60  | Y | Fail        |
| 605868 | M | Sidamo Re A Level or I   | 0 | 30  | N | Distinction |
| 606036 | M | South Regi HE Qualific   | 0 | 90  | N | Withdrawn   |
| 606064 | F | Afar Regio HE Qualific   | 0 | 90  | N | Pass        |
| 606170 | M | Oromia Re Lower Tha      | 0 | 30  | N | Pass        |
| 606182 | M | Afar Regio A Level or I  | 0 | 60  | N | Withdrawn   |
| 606344 | M | Sidamo Re A Level or I   | 0 | 60  | N | Withdrawn   |
| 606345 | F | Addis Abat A Level or I  | 0 | 90  | N | Pass        |
| 607047 | M | Afar Regio Post Gradu    | 0 | 60  | N | Pass        |
| 607085 | M | Afar Regio A Level or I  | 0 | 60  | N | Pass        |
| 607094 | F | Sidamo Re A Level or I   | 0 | 120 | N | Fail        |
| 607143 | M | Afar Regio Lower Tha     | 0 | 60  | N | Fail        |
| 607427 | F | South Wes Lower Tha      | 0 | 180 | Y | Withdrawn   |
| 607429 | F | Oromia Re A Level or I   | 0 | 30  | Y | Pass        |
| 607453 | M | Oromia Re HE Qualific    | 1 | 60  | N | Pass        |
| 607555 | M | Afar Regio HE Qualific   | 0 | 120 | N | Fail        |
| 607600 | M | South Regi Lower Tha     | 0 | 60  | N | Withdrawn   |
| 607668 | F | Tigrai Regi A Level or I | 0 | 120 | N | Pass        |
| 607812 | F | Afar Regio HE Qualific   | 0 | 60  | N | Pass        |
| 607900 | M | Oromia Re A Level or I   | 0 | 90  | N | Withdrawn   |
| 607947 | M | Amhara Re A Level or I   | 0 | 30  | N | Distinction |
| 608422 | M | North Regi A Level or I  | 0 | 60  | N | Pass        |
| 608423 | M | Sidamo Re Lower Tha      | 0 | 90  | N | Withdrawn   |
| 608571 | M | South Regi A Level or I  | 0 | 160 | N | Fail        |
| 608577 | M | North Regi HE Qualific   | 1 | 30  | N | Fail        |
| 608669 | M | Afar Regio A Level or I  | 0 | 60  | N | Fail        |
| 608681 | M | Amhara Re Lower Tha      | 0 | 60  | Y | Fail        |
| 608746 | F | South Regi Lower Tha     | 1 | 120 | N | Pass        |
| 608821 | F | North Regi A Level or I  | 0 | 60  | N | Withdrawn   |
| 608891 | M | Sidamo Re Lower Tha      | 0 | 60  | N | Fail        |
| 608978 | F | South Wes HE Qualific    | 0 | 60  | N | Distinction |
| 608983 | F | Tigrai Regi HE Qualific  | 0 | 60  | N | Withdrawn   |
| 609031 | F | Addis Abat Lower Tha     | 0 | 90  | N | Pass        |
| 609044 | M | Sidamo Re A Level or I   | 1 | 60  | N | Withdrawn   |
| 609235 | M | Afar Regio HE Qualific   | 0 | 90  | N | Distinction |

|        |   |                         |   |     |   |             |
|--------|---|-------------------------|---|-----|---|-------------|
| 609456 | M | Sidamo Re HE Qualific   | 0 | 120 | N | Pass        |
| 609527 | M | Oromia Re HE Qualific   | 0 | 60  | N | Withdrawn   |
| 609537 | M | North Regi A Level or I | 0 | 60  | N | Distinction |
| 609605 | M | Tigrai Regi HE Qualific | 1 | 60  | N | Withdrawn   |
| 609823 | M | North Regi HE Qualific  | 0 | 60  | N | Withdrawn   |
| 609852 | M | North Regi HE Qualific  | 0 | 120 | N | Pass        |
| 609891 | M | South Regi A Level or I | 0 | 60  | N | Fail        |
| 609969 | M | North Regi Lower Than   | 0 | 60  | N | Pass        |
| 610019 | M | Sidamo Re A Level or I  | 0 | 90  | N | Pass        |
| 610033 | M | South Regi A Level or I | 0 | 60  | N | Distinction |
| 610234 | M | Afar Regi HE Qualific   | 1 | 60  | N | Pass        |
| 610279 | M | South Regi A Level or I | 0 | 60  | N | Pass        |
| 610285 | M | Oromia Re A Level or I  | 0 | 60  | N | Withdrawn   |
| 610287 | M | Addis Abak HE Qualific  | 1 | 60  | N | Pass        |
| 610324 | M | Afar Regi HE Qualific   | 0 | 30  | N | Fail        |
| 610537 | M | Amhara Re A Level or I  | 0 | 120 | N | Fail        |
| 610549 | M | Amhara Re A Level or I  | 1 | 60  | N | Withdrawn   |
| 610622 | F | Somalia Re Lower Than   | 0 | 210 | N | Withdrawn   |
| 610643 | M | Oromia Re A Level or I  | 0 | 60  | N | Pass        |
| 610650 | M | Sidamo Re A Level or I  | 0 | 90  | N | Pass        |
| 610681 | F | South Regi A Level or I | 0 | 30  | N | Fail        |
| 610684 | M | Somalia Re Lower Than   | 0 | 60  | Y | Withdrawn   |
| 610881 | M | South Wes A Level or I  | 0 | 60  | N | Distinction |
| 610904 | M | South Wes A Level or I  | 0 | 60  | N | Pass        |
| 611033 | M | North Regi Post Gradu   | 0 | 30  | N | Withdrawn   |
| 611173 | F | Oromia Re A Level or I  | 1 | 60  | N | Pass        |
| 611255 | M | South Wes A Level or I  | 0 | 60  | N | Pass        |
| 611407 | M | South Regi A Level or I | 0 | 30  | N | Pass        |
| 611417 | F | North Regi Lower Than   | 0 | 60  | N | Pass        |
| 611465 | M | Sidamo Re Lower Than    | 1 | 120 | N | Withdrawn   |
| 611520 | M | Amhara Re A Level or I  | 0 | 180 | N | Withdrawn   |
| 611542 | M | North Regi A Level or I | 0 | 60  | Y | Pass        |
| 611593 | M | South Regi Post Gradu   | 0 | 60  | N | Distinction |
| 611813 | M | South Regi Lower Than   | 0 | 60  | N | Distinction |
| 611852 | M | Sidamo Re A Level or I  | 0 | 60  | N | Withdrawn   |
| 612127 | M | South Regi A Level or I | 1 | 30  | N | Withdrawn   |
| 612177 | M | Afar Regi HE Qualific   | 0 | 60  | N | Pass        |
| 612179 | F | Afar Regi HE Qualific   | 0 | 60  | N | Pass        |
| 612183 | M | Afar Regi A Level or I  | 0 | 60  | N | Pass        |
| 612187 | M | Afar Regi HE Qualific   | 0 | 60  | N | Pass        |
| 612283 | F | Afar Regi Lower Than    | 0 | 30  | N | Withdrawn   |
| 612327 | M | South Wes A Level or I  | 0 | 30  | N | Pass        |
| 612439 | M | Tigrai Regi HE Qualific | 0 | 60  | N | Fail        |
| 612449 | M | Addis Abak A Level or I | 0 | 60  | N | Withdrawn   |
| 612568 | F | South Wes A Level or I  | 0 | 60  | N | Withdrawn   |
| 612798 | F | Afar Regi HE Qualific   | 0 | 90  | N | Pass        |
| 612860 | M | South Regi A Level or I | 1 | 120 | N | Pass        |

|        |   |                          |   |     |   |             |
|--------|---|--------------------------|---|-----|---|-------------|
| 613122 | M | Amhara Re HE Qualific    | 0 | 60  | N | Fail        |
| 613237 | M | Afar Region A Level or I | 0 | 30  | N | Pass        |
| 613370 | M | Oromia Re A Level or I   | 0 | 60  | N | Distinction |
| 613644 | M | South Wes A Level or I   | 0 | 60  | N | Withdrawn   |
| 613667 | M | South Regi A Level or I  | 0 | 60  | N | Pass        |
| 613806 | M | Addis Abak HE Qualific   | 0 | 30  | N | Distinction |
| 613954 | M | Afar Region Lower Than   | 0 | 60  | N | Distinction |
| 614265 | M | South Regi Lower Than    | 1 | 60  | Y | Pass        |
| 614300 | M | Somalia Re A Level or I  | 0 | 60  | N | Pass        |
| 614458 | F | Afar Region A Level or I | 0 | 60  | N | Distinction |
| 614623 | M | Somalia Re A Level or I  | 0 | 120 | N | Withdrawn   |
| 614761 | M | South Regi Lower Than    | 0 | 60  | N | Withdrawn   |
| 614804 | M | Afar Region A Level or I | 1 | 60  | Y | Pass        |
| 615075 | M | Addis Abak A Level or I  | 0 | 60  | N | Distinction |
| 615225 | F | Somalia Re Lower Than    | 0 | 90  | N | Withdrawn   |
| 615241 | M | Sidamo Re A Level or I   | 0 | 60  | N | Distinction |
| 615242 | M | Addis Abak Lower Than    | 0 | 30  | N | Fail        |
| 615426 | M | Somalia Re Lower Than    | 0 | 180 | N | Withdrawn   |
| 616386 | M | Somalia Re Lower Than    | 0 | 60  | N | Pass        |
| 616407 | M | Tigrai Regi Lower Than   | 1 | 60  | N | Withdrawn   |
| 616439 | M | Addis Abak A Level or I  | 1 | 30  | N | Fail        |
| 616646 | M | Somalia Re A Level or I  | 0 | 120 | N | Withdrawn   |
| 616658 | M | North Regi Lower Than    | 0 | 30  | N | Pass        |
| 616789 | M | Sidamo Re A Level or I   | 0 | 30  | N | Fail        |
| 616870 | M | Sidamo Re Lower Than     | 0 | 60  | N | Pass        |
| 617130 | M | South Wes A Level or I   | 1 | 120 | N | Pass        |
| 617327 | F | South Regi A Level or I  | 0 | 60  | N | Withdrawn   |
| 617341 | F | Oromia Re A Level or I   | 0 | 90  | N | Withdrawn   |
| 617418 | M | Amhara Re A Level or I   | 0 | 30  | N | Fail        |
| 617740 | M | Tigrai Regi A Level or I | 0 | 60  | N | Pass        |
| 618377 | M | South Wes A Level or I   | 0 | 60  | N | Withdrawn   |
| 618513 | M | Sidamo Re A Level or I   | 0 | 60  | N | Fail        |
| 618590 | M | South Regi A Level or I  | 1 | 60  | Y | Fail        |
| 618649 | F | South Wes A Level or I   | 1 | 60  | Y | Pass        |
| 618683 | M | Tigrai Regi HE Qualific  | 0 | 60  | N | Distinction |
| 618777 | M | South Wes A Level or I   | 0 | 60  | N | Distinction |
| 618849 | M | North Regi HE Qualific   | 0 | 30  | N | Withdrawn   |
| 618865 | M | South Regi Lower Than    | 0 | 90  | N | Pass        |
| 618875 | M | North Regi A Level or I  | 0 | 30  | N | Fail        |
| 618982 | M | Oromia Re Lower Than     | 0 | 30  | N | Withdrawn   |
| 619359 | M | Addis Abak HE Qualific   | 0 | 60  | Y | Fail        |
| 619380 | M | Oromia Re A Level or I   | 0 | 30  | N | Pass        |
| 619472 | F | Sidamo Re A Level or I   | 0 | 120 | N | Withdrawn   |
| 619503 | M | North Regi A Level or I  | 0 | 30  | N | Withdrawn   |
| 619927 | M | South Wes Lower Than     | 0 | 60  | N | Pass        |
| 619928 | F | South Wes Lower Than     | 0 | 60  | N | Pass        |
| 620159 | M | South Wes HE Qualific    | 0 | 30  | N | Fail        |

|        |   |                           |   |     |   |             |
|--------|---|---------------------------|---|-----|---|-------------|
| 620231 | M | Afar Region HE Qualific   | 0 | 30  | N | Pass        |
| 620243 | M | South West Lower Thar     | 1 | 90  | N | Fail        |
| 620369 | M | Tigray Region A Level or  | 1 | 90  | N | Fail        |
| 620484 | M | Afar Region Lower Thar    | 0 | 30  | N | Fail        |
| 620608 | F | Amhara Region A Level or  | 0 | 120 | N | Withdrawn   |
| 620652 | M | Oromia Region HE Qualific | 0 | 90  | N | Pass        |
| 620716 | M | South West Lower Thar     | 0 | 60  | Y | Pass        |
| 620782 | M | South Region A Level or   | 0 | 150 | N | Withdrawn   |
| 620819 | M | South West A Level or     | 0 | 90  | N | Withdrawn   |
| 620897 | M | Sidamo Region A Level or  | 1 | 120 | N | Withdrawn   |
| 621001 | M | Sidamo Region A Level or  | 0 | 120 | N | Withdrawn   |
| 621300 | M | Sidamo Region A Level or  | 1 | 60  | N | Pass        |
| 621380 | M | South Region Lower Thar   | 0 | 90  | N | Withdrawn   |
| 621414 | M | North Region Lower Thar   | 0 | 60  | N | Withdrawn   |
| 621442 | M | Tigray Region Lower Thar  | 0 | 60  | N | Fail        |
| 621605 | F | Somalia Region Lower Thar | 0 | 60  | N | Pass        |
| 621696 | M | Sidamo Region A Level or  | 1 | 60  | N | Pass        |
| 621699 | F | Somalia Region Lower Thar | 0 | 150 | N | Withdrawn   |
| 621884 | F | South Region A Level or   | 0 | 90  | N | Distinction |
| 621906 | M | Oromia Region Lower Thar  | 0 | 60  | N | Withdrawn   |
| 622015 | M | Afar Region Lower Thar    | 1 | 30  | N | Withdrawn   |
| 622027 | M | South Region Lower Thar   | 0 | 90  | N | Withdrawn   |
| 622086 | M | Amhara Region HE Qualific | 0 | 90  | N | Withdrawn   |
| 622096 | M | South Region Lower Thar   | 0 | 60  | Y | Withdrawn   |
| 622192 | F | Afar Region A Level or    | 0 | 60  | N | Pass        |
| 622374 | M | Amhara Region HE Qualific | 0 | 60  | N | Pass        |
| 622384 | M | Afar Region A Level or    | 1 | 90  | Y | Fail        |
| 622413 | F | South Region Lower Thar   | 0 | 30  | N | Withdrawn   |
| 622425 | M | Amhara Region A Level or  | 0 | 30  | N | Withdrawn   |
| 622541 | M | Afar Region HE Qualific   | 0 | 60  | N | Pass        |
| 622686 | M | South Region Lower Thar   | 0 | 90  | N | Withdrawn   |
| 622812 | M | Somalia Region A Level or | 0 | 30  | Y | Pass        |
| 622890 | M | Amhara Region A Level or  | 0 | 60  | N | Withdrawn   |
| 622935 | M | Sidamo Region Lower Thar  | 0 | 60  | N | Pass        |
| 622972 | M | Sidamo Region HE Qualific | 0 | 30  | N | Fail        |
| 622976 | M | Oromia Region Lower Thar  | 0 | 60  | N | Pass        |
| 623002 | M | South Region Lower Thar   | 0 | 60  | Y | Fail        |
| 623079 | M | South West Lower Thar     | 0 | 60  | N | Withdrawn   |
| 623100 | M | Sidamo Region A Level or  | 0 | 90  | N | Distinction |
| 623124 | F | Sidamo Region A Level or  | 0 | 150 | N | Pass        |
| 623221 | F | Sidamo Region Lower Thar  | 0 | 30  | N | Distinction |
| 623407 | F | Addis Ababa No Formal     | 0 | 120 | N | Withdrawn   |
| 623484 | M | Tigray Region Lower Thar  | 0 | 60  | N | Distinction |
| 623511 | M | South Region HE Qualific  | 1 | 30  | N | Distinction |
| 623523 | M | Amhara Region A Level or  | 0 | 90  | N | Withdrawn   |
| 624060 | F | North Region Post Gradu   | 1 | 30  | N | Distinction |
| 624092 | M | Oromia Region Lower Thar  | 0 | 30  | N | Fail        |

|        |   |                          |   |     |   |             |
|--------|---|--------------------------|---|-----|---|-------------|
| 624126 | M | South Regi Lower Tha     | 1 | 90  | N | Withdrawn   |
| 624156 | M | South Regi A Level or I  | 0 | 60  | N | Fail        |
| 624209 | M | Amhara Re A Level or I   | 0 | 60  | N | Pass        |
| 624256 | F | Addis Abak A Level or I  | 0 | 150 | N | Pass        |
| 624354 | F | South Wes A Level or I   | 1 | 60  | N | Fail        |
| 624469 | M | Sidamo Re Lower Tha      | 0 | 60  | N | Withdrawn   |
| 624493 | M | Amhara Re Lower Tha      | 0 | 60  | N | Pass        |
| 624585 | M | Addis Abak Lower Tha     | 0 | 60  | N | Withdrawn   |
| 624730 | M | Sidamo Re Lower Tha      | 1 | 60  | N | Withdrawn   |
| 624789 | M | Afar Regio HE Qualific   | 0 | 60  | Y | Pass        |
| 624860 | M | Somalia Re Lower Tha     | 0 | 30  | N | Withdrawn   |
| 624927 | M | Somalia Re HE Qualific   | 0 | 60  | N | Distinction |
| 624957 | M | North Regi Lower Tha     | 0 | 60  | N | Withdrawn   |
| 625067 | M | South Regi HE Qualific   | 0 | 30  | N | Pass        |
| 625078 | F | Tigrai Regio HE Qualific | 1 | 90  | N | Withdrawn   |
| 625098 | M | Addis Abak Lower Tha     | 0 | 30  | N | Fail        |
| 625100 | F | South Regi Lower Tha     | 0 | 60  | N | Fail        |
| 625126 | M | Amhara Re Lower Tha      | 1 | 90  | N | Withdrawn   |
| 625218 | F | South Regi A Level or I  | 0 | 90  | Y | Withdrawn   |
| 625263 | F | Sidamo Re HE Qualific    | 0 | 30  | N | Pass        |
| 625288 | M | Somalia Re A Level or I  | 0 | 120 | N | Withdrawn   |
| 625357 | M | Amhara Re Lower Tha      | 0 | 30  | N | Pass        |
| 625541 | M | Sidamo Re Lower Tha      | 0 | 30  | N | Fail        |
| 625928 | F | North Regi Lower Tha     | 0 | 90  | N | Withdrawn   |
| 626103 | M | Oromia Re A Level or I   | 0 | 60  | N | Pass        |
| 626296 | M | South Regi Lower Tha     | 1 | 60  | N | Pass        |
| 626407 | M | Oromia Re Lower Tha      | 0 | 60  | N | Fail        |
| 626417 | M | Tigrai Regio Lower Tha   | 1 | 60  | N | Pass        |
| 626463 | M | Addis Abak A Level or I  | 0 | 120 | Y | Pass        |
| 626519 | M | Sidamo Re A Level or I   | 0 | 30  | N | Pass        |
| 626625 | M | Afar Regio A Level or I  | 1 | 30  | N | Fail        |
| 626753 | M | North Regi A Level or I  | 0 | 60  | N | Withdrawn   |
| 626757 | M | Sidamo Re A Level or I   | 0 | 30  | N | Pass        |
| 626768 | M | Sidamo Re A Level or I   | 0 | 30  | Y | Withdrawn   |
| 626878 | M | South Wes A Level or I   | 0 | 60  | N | Fail        |
| 627184 | M | Amhara Re A Level or I   | 0 | 30  | N | Fail        |
| 627283 | M | Amhara Re A Level or I   | 0 | 120 | N | Pass        |
| 627290 | M | Oromia Re Lower Tha      | 0 | 30  | N | Fail        |
| 627295 | M | Amhara Re Lower Tha      | 0 | 120 | Y | Withdrawn   |
| 627401 | M | Sidamo Re HE Qualific    | 0 | 60  | N | Distinction |
| 627417 | F | South Wes Post Gradu     | 0 | 60  | N | Pass        |
| 627450 | M | North Regi Lower Tha     | 0 | 30  | N | Fail        |
| 627471 | F | Afar Regio Lower Tha     | 0 | 30  | N | Pass        |
| 627527 | M | South Wes A Level or I   | 0 | 120 | Y | Pass        |
| 627581 | M | South Wes Lower Tha      | 0 | 90  | Y | Withdrawn   |
| 627599 | M | Oromia Re A Level or I   | 0 | 30  | N | Withdrawn   |
| 627947 | F | South Regi A Level or I  | 1 | 60  | N | Withdrawn   |

|        |   |                          |   |     |   |             |
|--------|---|--------------------------|---|-----|---|-------------|
| 628008 | M | Oromia Re Lower Tha      | 0 | 60  | N | Withdrawn   |
| 628034 | F | North Regi HE Qualific   | 0 | 60  | N | Pass        |
| 628114 | M | Afar Regioi A Level or I | 0 | 30  | N | Pass        |
| 628216 | M | Oromia Re Lower Tha      | 0 | 60  | Y | Pass        |
| 628300 | M | Addis Abak A Level or I  | 0 | 60  | N | Pass        |
| 628361 | M | Afar Regioi HE Qualific  | 0 | 60  | N | Distinction |
| 628376 | M | Afar Regioi HE Qualific  | 0 | 60  | N | Pass        |
| 628407 | M | South Regi Lower Tha     | 0 | 60  | N | Pass        |
| 628480 | M | South Regi Lower Tha     | 0 | 90  | N | Withdrawn   |
| 628618 | M | South Wes A Level or I   | 0 | 30  | N | Fail        |
| 628706 | M | Oromia Re A Level or I   | 0 | 150 | Y | Withdrawn   |
| 628717 | M | Sidamo Re A Level or I   | 0 | 180 | N | Withdrawn   |
| 628720 | M | Addis Abak A Level or I  | 0 | 60  | N | Withdrawn   |
| 628777 | M | Sidamo Re A Level or I   | 0 | 30  | N | Pass        |
| 628803 | M | Sidamo Re A Level or I   | 1 | 180 | N | Withdrawn   |
| 628806 | M | South Regi A Level or I  | 0 | 60  | N | Withdrawn   |
| 628846 | M | South Wes A Level or I   | 1 | 180 | N | Pass        |
| 628910 | M | Sidamo Re A Level or I   | 0 | 30  | N | Pass        |
| 629014 | F | Oromia Re Lower Tha      | 0 | 90  | N | Withdrawn   |
| 629056 | M | Tigrai Regi Lower Tha    | 1 | 60  | Y | Withdrawn   |
| 629096 | M | South Regi Lower Tha     | 0 | 60  | N | Fail        |
| 629400 | M | Afar Regioi A Level or I | 0 | 90  | N | Withdrawn   |
| 629405 | M | Sidamo Re A Level or I   | 0 | 60  | N | Pass        |
| 629523 | F | Addis Abak Lower Tha     | 0 | 60  | N | Distinction |
| 629535 | M | Somalia Re HE Qualific   | 0 | 60  | N | Fail        |
| 629560 | F | Amhara Re Lower Tha      | 1 | 60  | N | Withdrawn   |
| 629607 | M | Afar Regioi Lower Tha    | 0 | 60  | N | Pass        |
| 629692 | M | Amhara Re A Level or I   | 1 | 60  | N | Distinction |
| 629696 | M | Tigrai Regi HE Qualific  | 1 | 60  | N | Distinction |
| 629748 | F | Addis Abak A Level or I  | 0 | 90  | N | Withdrawn   |
| 629822 | M | Addis Abak Lower Tha     | 0 | 60  | Y | Withdrawn   |
| 630013 | M | South Regi A Level or I  | 0 | 60  | N | Fail        |
| 630073 | M | Afar Regioi HE Qualific  | 0 | 90  | N | Withdrawn   |
| 630165 | M | North Regi A Level or I  | 0 | 30  | N | Withdrawn   |
| 630177 | M | Sidamo Re HE Qualific    | 0 | 60  | N | Pass        |
| 630200 | F | Somalia Re A Level or I  | 1 | 30  | N | Fail        |
| 630430 | F | South Wes A Level or I   | 0 | 120 | N | Pass        |
| 630431 | F | South Wes A Level or I   | 0 | 120 | N | Fail        |
| 630452 | M | South Regi A Level or I  | 0 | 60  | N | Pass        |
| 630467 | M | Sidamo Re HE Qualific    | 0 | 60  | N | Distinction |
| 630479 | M | Sidamo Re Lower Tha      | 0 | 60  | N | Pass        |
| 630510 | M | Oromia Re A Level or I   | 0 | 240 | N | Withdrawn   |
| 630519 | M | Somalia Re HE Qualific   | 0 | 60  | N | Pass        |
| 630541 | M | Amhara Re Lower Tha      | 0 | 90  | N | Withdrawn   |
| 630891 | M | Afar Regioi A Level or I | 0 | 60  | N | Withdrawn   |
| 630905 | M | Tigrai Regi HE Qualific  | 0 | 120 | N | Distinction |
| 630935 | M | Sidamo Re Lower Tha      | 0 | 60  | N | Pass        |



|        |   |                          |   |     |   |             |
|--------|---|--------------------------|---|-----|---|-------------|
| 631016 | M | North Regi Lower Tha     | 0 | 90  | N | Withdrawn   |
| 631023 | M | Addis Abak A Level or I  | 1 | 60  | N | Withdrawn   |
| 631073 | M | South Wes HE Qualific    | 0 | 30  | N | Fail        |
| 631117 | M | North Regi HE Qualific   | 0 | 30  | N | Distinction |
| 631247 | M | South Regi A Level or I  | 0 | 60  | N | Distinction |
| 631356 | M | South Regi HE Qualific   | 0 | 60  | N | Withdrawn   |
| 631491 | M | Sidamo Re Post Gradu     | 0 | 90  | N | Distinction |
| 631573 | F | Amhara Re Lower Tha      | 0 | 30  | N | Pass        |
| 631663 | F | Sidamo Re A Level or I   | 1 | 60  | N | Pass        |
| 631771 | M | Somalia Re HE Qualific   | 0 | 60  | N | Distinction |
| 631851 | M | North Regi HE Qualific   | 0 | 60  | N | Distinction |
| 631860 | M | Tigrai Regi A Level or I | 0 | 60  | N | Withdrawn   |
| 631870 | M | Somalia Re A Level or I  | 0 | 90  | N | Withdrawn   |
| 631880 | M | Somalia Re Lower Tha     | 0 | 90  | N | Withdrawn   |
| 631924 | F | Amhara Re A Level or I   | 0 | 120 | N | Pass        |
| 632004 | M | South Regi HE Qualific   | 0 | 30  | N | Pass        |
| 632083 | M | South Regi A Level or I  | 0 | 30  | N | Pass        |
| 632134 | M | Sidamo Re A Level or I   | 1 | 30  | N | Fail        |
| 632260 | F | South Wes Lower Tha      | 1 | 60  | N | Withdrawn   |
| 632378 | M | Sidamo Re A Level or I   | 0 | 30  | N | Distinction |
| 632389 | M | North Regi A Level or I  | 0 | 60  | N | Withdrawn   |
| 632451 | F | Oromia Re A Level or I   | 0 | 60  | N | Pass        |
| 632575 | M | Somalia Re Lower Tha     | 0 | 60  | Y | Pass        |
| 632626 | M | Oromia Re A Level or I   | 0 | 90  | N | Withdrawn   |
| 632637 | M | Sidamo Re Lower Tha      | 1 | 60  | N | Fail        |
| 632700 | M | Sidamo Re A Level or I   | 0 | 60  | N | Withdrawn   |
| 632709 | F | Somalia Re A Level or I  | 0 | 30  | N | Pass        |
| 632756 | M | North Regi HE Qualific   | 0 | 60  | N | Distinction |
| 632866 | F | Sidamo Re Lower Tha      | 0 | 60  | N | Withdrawn   |
| 632904 | M | Afar Regioi HE Qualific  | 1 | 60  | N | Withdrawn   |
| 632929 | M | Oromia Re A Level or I   | 0 | 60  | Y | Withdrawn   |
| 632942 | F | Sidamo Re Lower Tha      | 0 | 120 | N | Withdrawn   |
| 633008 | M | Tigrai Regi Post Gradu   | 0 | 30  | N | Distinction |
| 633047 | M | Amhara Re A Level or I   | 0 | 30  | N | Fail        |
| 633069 | M | Afar Regioi A Level or I | 0 | 30  | N | Distinction |
| 633157 | M | South Regi A Level or I  | 0 | 60  | N | Withdrawn   |
| 633179 | M | Amhara Re HE Qualific    | 0 | 60  | N | Pass        |
| 633198 | F | Addis Abak Lower Tha     | 0 | 60  | N | Fail        |
| 633205 | M | Somalia Re A Level or I  | 0 | 180 | N | Withdrawn   |
| 633238 | F | Oromia Re Lower Tha      | 0 | 90  | N | Withdrawn   |
| 633303 | M | Somalia Re Post Gradu    | 0 | 60  | N | Distinction |
| 633328 | F | Sidamo Re Post Gradu     | 0 | 60  | N | Withdrawn   |
| 633334 | M | Addis Abak Lower Tha     | 0 | 90  | N | Fail        |
| 633504 | M | South Wes A Level or I   | 0 | 120 | N | Distinction |
| 633511 | M | Addis Abak A Level or I  | 0 | 30  | N | Pass        |
| 633544 | M | Afar Regioi Lower Tha    | 0 | 60  | N | Pass        |
| 633618 | M | South Regi A Level or I  | 0 | 90  | N | Withdrawn   |

|        |   |                          |   |     |   |             |
|--------|---|--------------------------|---|-----|---|-------------|
| 633634 | M | North Regi A Level or I  | 0 | 30  | N | Fail        |
| 633647 | M | Sidamo Re A Level or I   | 0 | 30  | N | Pass        |
| 633655 | M | South Wes A Level or I   | 0 | 60  | N | Distinction |
| 633746 | M | Sidamo Re A Level or I   | 0 | 30  | N | Pass        |
| 633756 | M | South Wes Lower Than     | 0 | 60  | N | Withdrawn   |
| 633914 | F | Somalia Re A Level or I  | 0 | 60  | N | Pass        |
| 633960 | M | North Regi Post Gradu    | 0 | 60  | N | Distinction |
| 633990 | M | Sidamo Re A Level or I   | 0 | 30  | N | Withdrawn   |
| 634111 | M | Oromia Re HE Qualific    | 0 | 90  | N | Withdrawn   |
| 634119 | F | South Regi A Level or I  | 0 | 60  | N | Pass        |
| 634193 | M | Somalia Re Lower Than    | 0 | 30  | N | Withdrawn   |
| 634200 | M | Afar Regio HE Qualific   | 0 | 60  | N | Pass        |
| 634309 | M | Sidamo Re A Level or I   | 0 | 30  | N | Fail        |
| 634351 | M | Addis Abak A Level or I  | 0 | 60  | N | Pass        |
| 634365 | F | Addis Abak HE Qualific   | 0 | 30  | N | Distinction |
| 634420 | F | South Wes Lower Than     | 0 | 30  | N | Withdrawn   |
| 634536 | M | Somalia Re HE Qualific   | 0 | 120 | N | Pass        |
| 634552 | M | Oromia Re A Level or I   | 0 | 60  | N | Pass        |
| 634600 | M | Afar Regio Lower Than    | 0 | 60  | N | Fail        |
| 634648 | M | Sidamo Re A Level or I   | 0 | 60  | N | Pass        |
| 634655 | M | Sidamo Re HE Qualific    | 1 | 60  | N | Withdrawn   |
| 634721 | M | Afar Regio A Level or I  | 0 | 60  | N | Fail        |
| 634776 | M | Somalia Re A Level or I  | 0 | 90  | N | Withdrawn   |
| 634817 | M | North Regi Lower Than    | 1 | 60  | N | Withdrawn   |
| 634824 | M | South Regi A Level or I  | 0 | 60  | N | Pass        |
| 634853 | M | South Wes Post Gradu     | 1 | 30  | N | Pass        |
| 635410 | M | South Regi A Level or I  | 0 | 150 | Y | Withdrawn   |
| 635573 | M | Afar Regio A Level or I  | 0 | 30  | N | Distinction |
| 635711 | M | Somalia Re HE Qualific   | 0 | 60  | N | Pass        |
| 635802 | F | Oromia Re A Level or I   | 0 | 90  | N | Distinction |
| 636000 | M | Oromia Re A Level or I   | 0 | 30  | N | Pass        |
| 636124 | M | Somalia Re Post Gradu    | 0 | 60  | N | Distinction |
| 636243 | F | Amhara Re A Level or I   | 0 | 120 | N | Withdrawn   |
| 636364 | M | South Regi Lower Than    | 0 | 90  | N | Distinction |
| 636387 | F | North Regi A Level or I  | 0 | 120 | N | Distinction |
| 636420 | M | Somalia Re Lower Than    | 0 | 120 | N | Withdrawn   |
| 636422 | M | Sidamo Re HE Qualific    | 0 | 30  | N | Pass        |
| 636443 | M | North Regi A Level or I  | 0 | 90  | N | Withdrawn   |
| 636628 | M | Oromia Re A Level or I   | 0 | 120 | Y | Withdrawn   |
| 636716 | M | Addis Abak A Level or I  | 0 | 120 | N | Distinction |
| 636732 | F | Sidamo Re A Level or I   | 0 | 90  | N | Fail        |
| 636743 | M | Addis Abak A Level or I  | 0 | 60  | N | Withdrawn   |
| 636783 | M | North Regi HE Qualific   | 0 | 150 | N | Distinction |
| 636996 | M | Afar Regio A Level or I  | 0 | 90  | Y | Pass        |
| 637070 | M | Afar Regio HE Qualific   | 0 | 60  | Y | Pass        |
| 637086 | F | Somalia Re A Level or I  | 0 | 90  | N | Withdrawn   |
| 637089 | M | Tigrai Regi A Level or I | 0 | 180 | N | Withdrawn   |

|        |   |                            |   |     |   |             |
|--------|---|----------------------------|---|-----|---|-------------|
| 637325 | M | Afar Region HE Qualific    | 0 | 90  | N | Withdrawn   |
| 637691 | M | Somalia Re A Level or I    | 0 | 90  | N | Fail        |
| 637708 | M | Addis Abak HE Qualific     | 0 | 120 | N | Distinction |
| 637754 | M | North Regi A Level or I    | 0 | 120 | Y | Distinction |
| 637939 | M | South Wes A Level or I     | 0 | 150 | N | Withdrawn   |
| 638018 | M | South Regi A Level or I    | 0 | 60  | N | Pass        |
| 638040 | M | Afar Region Post Gradu     | 0 | 120 | N | Withdrawn   |
| 638243 | M | South Regi A Level or I    | 0 | 120 | Y | Withdrawn   |
| 638254 | F | Afar Region A Level or I   | 0 | 120 | N | Pass        |
| 638426 | M | Tigrai Region HE Qualific  | 0 | 280 | N | Withdrawn   |
| 638504 | F | South Wes A Level or I     | 0 | 60  | N | Withdrawn   |
| 638771 | M | Oromia Re A Level or I     | 0 | 60  | N | Pass        |
| 639012 | F | Amhara Re A Level or I     | 0 | 150 | N | Fail        |
| 639176 | F | Sidamo Re A Level or I     | 0 | 360 | Y | Withdrawn   |
| 639232 | M | Sidamo Re A Level or I     | 0 | 120 | N | Withdrawn   |
| 640109 | M | Sidamo Re No Formal        | 0 | 90  | N | Withdrawn   |
| 640443 | M | South Regi A Level or I    | 0 | 120 | Y | Withdrawn   |
| 640662 | F | South Wes HE Qualific      | 0 | 90  | N | Withdrawn   |
| 640773 | M | South Wes Lower Than       | 0 | 150 | Y | Pass        |
| 641347 | M | Afar Region A Level or I   | 0 | 60  | N | Withdrawn   |
| 641363 | M | North Regi A Level or I    | 0 | 120 | N | Pass        |
| 641684 | M | Sidamo Re Lower Than       | 0 | 120 | N | Withdrawn   |
| 641696 | M | North Regi Lower Than      | 0 | 30  | N | Pass        |
| 641804 | M | South Regi A Level or I    | 0 | 120 | N | Fail        |
| 642066 | M | South Wes A Level or I     | 0 | 90  | N | Withdrawn   |
| 642261 | M | North Regi A Level or I    | 0 | 30  | N | Withdrawn   |
| 642291 | F | Tigrai Region Lower Than   | 0 | 30  | N | Distinction |
| 642591 | M | Addis Abak Lower Than      | 0 | 60  | N | Pass        |
| 642627 | M | Sidamo Re A Level or I     | 0 | 90  | N | Withdrawn   |
| 642744 | M | Somalia Re A Level or I    | 0 | 150 | N | Withdrawn   |
| 642790 | M | Sidamo Re Lower Than       | 0 | 150 | N | Withdrawn   |
| 642817 | F | Addis Abak A Level or I    | 0 | 120 | N | Pass        |
| 642838 | F | Sidamo Re A Level or I     | 0 | 90  | N | Pass        |
| 642839 | F | South Regi Lower Than      | 0 | 150 | N | Withdrawn   |
| 642850 | M | Tigrai Region A Level or I | 0 | 60  | N | Distinction |
| 642902 | F | Sidamo Re A Level or I     | 0 | 60  | N | Pass        |
| 643114 | M | Tigrai Region Lower Than   | 0 | 150 | N | Withdrawn   |
| 643199 | M | Somalia Re HE Qualific     | 0 | 120 | N | Withdrawn   |
| 643200 | M | Amhara Re Lower Than       | 0 | 90  | N | Withdrawn   |
| 643269 | F | South Regi HE Qualific     | 0 | 120 | N | Withdrawn   |
| 643278 | F | Addis Abak A Level or I    | 0 | 60  | N | Withdrawn   |
| 643309 | M | Addis Abak A Level or I    | 0 | 120 | N | Withdrawn   |
| 643357 | F | Addis Abak A Level or I    | 0 | 120 | N | Withdrawn   |
| 643403 | M | Sidamo Re HE Qualific      | 0 | 60  | N | Distinction |
| 643404 | F | Afar Region HE Qualific    | 0 | 60  | N | Fail        |
| 643416 | M | Addis Abak A Level or I    | 0 | 90  | N | Withdrawn   |
| 643434 | M | Sidamo Re HE Qualific      | 0 | 60  | Y | Withdrawn   |

|        |   |                          |   |     |   |             |
|--------|---|--------------------------|---|-----|---|-------------|
| 643457 | M | Addis Abat Lower Tha     | 0 | 60  | N | Withdrawn   |
| 643514 | M | Somalia Re A Level or I  | 0 | 90  | N | Withdrawn   |
| 643568 | M | Tigrai Regi A Level or I | 0 | 120 | N | Pass        |
| 643690 | M | South Wes Lower Tha      | 0 | 180 | N | Withdrawn   |
| 643757 | M | South Regi HE Qualific   | 0 | 120 | N | Fail        |
| 643758 | M | South Wes A Level or I   | 0 | 120 | N | Fail        |
| 643770 | M | Afar Regio HE Qualific   | 0 | 90  | N | Withdrawn   |
| 644093 | M | South Wes HE Qualific    | 0 | 30  | N | Pass        |
| 644242 | M | Sidamo Re A Level or I   | 0 | 120 | N | Distinction |
| 644246 | M | Sidamo Re A Level or I   | 0 | 60  | N | Distinction |
| 644369 | M | Tigrai Regi Lower Tha    | 0 | 150 | N | Pass        |
| 644416 | F | South Regi A Level or I  | 0 | 90  | N | Distinction |
| 644453 | F | South Regi A Level or I  | 0 | 90  | N | Withdrawn   |
| 644480 | F | Sidamo Re A Level or I   | 0 | 120 | N | Pass        |
| 644516 | M | North Regi Lower Tha     | 0 | 120 | N | Withdrawn   |
| 644828 | M | Somalia Re HE Qualific   | 0 | 180 | N | Pass        |
| 644848 | M | Afar Regio Lower Tha     | 0 | 120 | N | Fail        |
| 644905 | M | Oromia Re HE Qualific    | 0 | 120 | N | Withdrawn   |
| 644951 | M | Addis Abat A Level or I  | 0 | 90  | N | Distinction |
| 644974 | M | Sidamo Re A Level or I   | 0 | 120 | N | Pass        |
| 645124 | F | Sidamo Re Post Gradu     | 0 | 30  | N | Distinction |
| 645144 | M | Sidamo Re HE Qualific    | 0 | 60  | N | Distinction |
| 645160 | F | Addis Abat A Level or I  | 0 | 150 | N | Withdrawn   |
| 645174 | M | South Regi A Level or I  | 0 | 60  | N | Pass        |
| 645216 | M | Sidamo Re A Level or I   | 0 | 120 | N | Distinction |
| 645219 | M | South Regi Lower Tha     | 0 | 120 | N | Withdrawn   |
| 645334 | F | Afar Regio HE Qualific   | 0 | 60  | N | Distinction |
| 645353 | M | Amhara Re Lower Tha      | 0 | 240 | N | Withdrawn   |
| 645369 | F | Amhara Re A Level or I   | 0 | 120 | N | Pass        |
| 645481 | M | South Regi Lower Tha     | 0 | 60  | Y | Withdrawn   |
| 645586 | M | Afar Regio HE Qualific   | 0 | 90  | N | Pass        |
| 645590 | M | Afar Regio HE Qualific   | 0 | 60  | N | Fail        |
| 645698 | M | South Regi Lower Tha     | 0 | 30  | N | Pass        |
| 645710 | M | South Regi HE Qualific   | 0 | 120 | N | Withdrawn   |
| 645770 | M | South Wes A Level or I   | 0 | 90  | N | Fail        |
| 645792 | M | South Wes Lower Tha      | 0 | 110 | N | Distinction |
| 645835 | M | North Regi A Level or I  | 0 | 120 | N | Withdrawn   |
| 645847 | M | South Wes HE Qualific    | 0 | 90  | N | Withdrawn   |
| 645867 | M | Afar Regio HE Qualific   | 0 | 120 | N | Withdrawn   |
| 645939 | M | South Regi A Level or I  | 0 | 120 | N | Withdrawn   |
| 645948 | M | South Regi Lower Tha     | 0 | 90  | N | Withdrawn   |
| 646071 | M | Afar Regio Post Gradu    | 0 | 60  | N | Pass        |
| 646077 | M | South Wes A Level or I   | 0 | 120 | Y | Withdrawn   |
| 646173 | M | Sidamo Re HE Qualific    | 0 | 30  | N | Pass        |
| 646351 | F | Tigrai Regi A Level or I | 0 | 90  | N | Distinction |
| 646359 | M | Oromia Re A Level or I   | 0 | 150 | N | Withdrawn   |
| 646363 | M | Addis Abat HE Qualific   | 0 | 60  | N | Fail        |

|        |   |             |              |   |     |   |             |
|--------|---|-------------|--------------|---|-----|---|-------------|
| 646406 | M | North Regi  | A Level or I | 0 | 60  | N | Distinction |
| 646413 | F | Somalia Re  | Lower Than   | 0 | 120 | N | Pass        |
| 646459 | M | Sidamo Re   | HE Qualific  | 0 | 150 | N | Withdrawn   |
| 646481 | M | Sidamo Re   | A Level or I | 0 | 60  | N | Pass        |
| 646502 | M | Sidamo Re   | A Level or I | 0 | 60  | N | Withdrawn   |
| 646547 | M | Amhara Re   | Lower Than   | 0 | 90  | N | Withdrawn   |
| 646553 | M | Oromia Re   | HE Qualific  | 0 | 90  | N | Fail        |
| 646589 | M | South Wes   | A Level or I | 0 | 120 | Y | Pass        |
| 646628 | F | Addis Abak  | Lower Than   | 0 | 60  | N | Fail        |
| 646689 | M | Addis Abak  | A Level or I | 0 | 120 | N | Withdrawn   |
| 646739 | M | Afar Regio  | A Level or I | 0 | 120 | N | Fail        |
| 646747 | F | Somalia Re  | A Level or I | 0 | 60  | N | Withdrawn   |
| 646751 | F | Amhara Re   | A Level or I | 0 | 30  | N | Withdrawn   |
| 646841 | M | Amhara Re   | Lower Than   | 0 | 60  | N | Withdrawn   |
| 646938 | M | Sidamo Re   | A Level or I | 0 | 120 | N | Withdrawn   |
| 646998 | M | Somalia Re  | A Level or I | 0 | 60  | N | Pass        |
| 647083 | M | Sidamo Re   | A Level or I | 0 | 180 | N | Fail        |
| 647148 | M | Afar Regio  | A Level or I | 0 | 120 | N | Pass        |
| 647184 | M | Sidamo Re   | Lower Than   | 0 | 120 | N | Withdrawn   |
| 647195 | F | Oromia Re   | A Level or I | 0 | 120 | N | Distinction |
| 647391 | F | Afar Regio  | HE Qualific  | 0 | 150 | N | Withdrawn   |
| 647406 | M | Sidamo Re   | A Level or I | 0 | 120 | N | Withdrawn   |
| 647417 | M | South Regi  | A Level or I | 0 | 120 | Y | Withdrawn   |
| 647464 | M | South Wes   | A Level or I | 0 | 120 | N | Pass        |
| 647479 | F | Amhara Re   | A Level or I | 0 | 60  | N | Fail        |
| 647518 | M | Tigrai Regi | A Level or I | 0 | 120 | N | Withdrawn   |
| 647593 | M | Afar Regio  | A Level or I | 0 | 120 | N | Pass        |
| 647645 | M | Addis Abak  | A Level or I | 0 | 90  | N | Withdrawn   |
| 647684 | M | North Regi  | Post Gradu   | 0 | 30  | N | Withdrawn   |
| 647735 | F | Tigrai Regi | A Level or I | 0 | 60  | N | Fail        |
| 647763 | F | Afar Regio  | Lower Than   | 0 | 60  | N | Pass        |
| 647865 | M | Addis Abak  | A Level or I | 0 | 60  | N | Pass        |
| 647869 | M | Sidamo Re   | A Level or I | 0 | 120 | Y | Withdrawn   |
| 647887 | F | Sidamo Re   | No Formal    | 0 | 60  | N | Withdrawn   |
| 647888 | M | Oromia Re   | A Level or I | 0 | 60  | N | Pass        |
| 647947 | M | South Wes   | Lower Than   | 0 | 210 | Y | Withdrawn   |
| 648085 | F | South Regi  | A Level or I | 0 | 60  | N | Pass        |
| 648140 | M | South Regi  | A Level or I | 0 | 120 | N | Pass        |
| 648161 | F | Addis Abak  | Post Gradu   | 0 | 120 | N | Pass        |
| 648250 | F | Sidamo Re   | HE Qualific  | 0 | 90  | N | Withdrawn   |
| 648285 | M | South Wes   | A Level or I | 0 | 60  | N | Pass        |
| 648314 | M | Amhara Re   | Lower Than   | 0 | 120 | N | Withdrawn   |
| 648321 | F | Somalia Re  | A Level or I | 0 | 90  | N | Withdrawn   |
| 648354 | F | Amhara Re   | A Level or I | 0 | 120 | N | Withdrawn   |
| 648363 | M | Sidamo Re   | Lower Than   | 0 | 60  | N | Distinction |
| 648369 | M | Tigrai Regi | HE Qualific  | 0 | 60  | N | Pass        |
| 648419 | F | Amhara Re   | A Level or I | 0 | 120 | N | Withdrawn   |

|        |   |                          |   |     |   |             |
|--------|---|--------------------------|---|-----|---|-------------|
| 648448 | M | South Regi A Level or I  | 0 | 90  | N | Withdrawn   |
| 648477 | M | Sidamo Re Lower Than     | 0 | 120 | N | Withdrawn   |
| 648521 | F | Sidamo Re A Level or I   | 0 | 90  | N | Withdrawn   |
| 648536 | M | Somalia Re A Level or I  | 0 | 120 | N | Withdrawn   |
| 648590 | M | Sidamo Re A Level or I   | 0 | 120 | N | Fail        |
| 648605 | M | Somalia Re A Level or I  | 0 | 120 | N | Withdrawn   |
| 648606 | F | Addis Abak Lower Than    | 0 | 120 | N | Withdrawn   |
| 648625 | F | Addis Abak A Level or I  | 0 | 60  | N | Withdrawn   |
| 648649 | F | Addis Abak Lower Than    | 0 | 90  | N | Pass        |
| 648654 | M | South Regi Lower Than    | 0 | 60  | N | Withdrawn   |
| 648781 | M | North Regi A Level or I  | 0 | 60  | N | Pass        |
| 648818 | F | South Wes Post Gradu     | 0 | 30  | N | Pass        |
| 648819 | M | Somalia Re A Level or I  | 0 | 120 | N | Withdrawn   |
| 648833 | M | Amhara Re Lower Than     | 0 | 210 | N | Withdrawn   |
| 648854 | M | Amhara Re Lower Than     | 0 | 120 | N | Pass        |
| 648868 | M | Amhara Re A Level or I   | 0 | 270 | N | Withdrawn   |
| 648872 | F | Tigrai Regi Lower Than   | 0 | 120 | N | Withdrawn   |
| 648959 | M | Oromia Re Lower Than     | 0 | 240 | N | Fail        |
| 649001 | M | Sidamo Re Lower Than     | 0 | 60  | N | Withdrawn   |
| 649105 | F | Somalia Re A Level or I  | 0 | 180 | N | Distinction |
| 649129 | M | South Wes A Level or I   | 0 | 60  | N | Distinction |
| 649141 | M | South Wes A Level or I   | 0 | 90  | N | Withdrawn   |
| 649215 | M | Sidamo Re Lower Than     | 0 | 90  | N | Withdrawn   |
| 649248 | F | Sidamo Re Lower Than     | 0 | 90  | N | Withdrawn   |
| 649343 | M | Somalia Re A Level or I  | 0 | 90  | N | Pass        |
| 649394 | M | South Regi A Level or I  | 0 | 120 | N | Withdrawn   |
| 649413 | M | Sidamo Re A Level or I   | 0 | 120 | N | Withdrawn   |
| 649523 | M | Amhara Re Lower Than     | 0 | 120 | N | Withdrawn   |
| 649592 | M | South Wes A Level or I   | 0 | 60  | N | Distinction |
| 649604 | F | Amhara Re No Formal      | 0 | 90  | N | Pass        |
| 649607 | F | Somalia Re A Level or I  | 0 | 90  | N | Withdrawn   |
| 649701 | M | Sidamo Re Lower Than     | 0 | 120 | N | Withdrawn   |
| 649761 | M | Sidamo Re A Level or I   | 0 | 120 | N | Fail        |
| 649780 | M | South Wes A Level or I   | 0 | 90  | Y | Withdrawn   |
| 649816 | M | South Regi Post Gradu    | 0 | 75  | N | Fail        |
| 649840 | M | South Regi Lower Than    | 0 | 90  | N | Pass        |
| 649856 | F | Afar Regioi A Level or I | 0 | 60  | N | Fail        |
| 649868 | M | Sidamo Re A Level or I   | 0 | 90  | N | Pass        |
| 650070 | M | Afar Regioi A Level or I | 0 | 90  | Y | Withdrawn   |
| 650074 | M | Tigrai Regi A Level or I | 0 | 120 | N | Withdrawn   |
| 650085 | M | Somalia Re A Level or I  | 0 | 90  | N | Withdrawn   |
| 650099 | M | South Regi HE Qualific   | 0 | 60  | N | Pass        |
| 650105 | M | Afar Regioi Lower Than   | 0 | 60  | N | Fail        |
| 650133 | F | Addis Abak A Level or I  | 0 | 60  | N | Withdrawn   |
| 650145 | M | Tigrai Regi Lower Than   | 0 | 60  | N | Fail        |
| 650163 | F | Addis Abak A Level or I  | 0 | 60  | N | Withdrawn   |
| 650271 | M | North Regi HE Qualific   | 0 | 120 | N | Fail        |

|        |   |                         |   |     |   |             |
|--------|---|-------------------------|---|-----|---|-------------|
| 650341 | F | Sidamo Re A Level or l  | 0 | 150 | N | Fail        |
| 650370 | F | Afar Regio HE Qualific  | 0 | 90  | N | Pass        |
| 650414 | M | Oromia Re A Level or l  | 0 | 120 | N | Withdrawn   |
| 650424 | M | South Regi Lower Tha    | 0 | 120 | N | Withdrawn   |
| 650511 | M | South Regi A Level or l | 0 | 60  | N | Distinction |
| 650544 | M | South Regi Lower Tha    | 0 | 90  | N | Withdrawn   |
| 650787 | F | Addis Abat A Level or l | 0 | 120 | N | Pass        |
| 650838 | F | Sidamo Re HE Qualific   | 0 | 120 | N | Withdrawn   |
| 650849 | F | Afar Regio HE Qualific  | 0 | 60  | N | Withdrawn   |
| 650850 | F | South Wes A Level or l  | 0 | 180 | N | Withdrawn   |
| 650856 | M | Sidamo Re Lower Tha     | 0 | 120 | N | Pass        |
| 650863 | F | North Regi A Level or l | 0 | 60  | N | Distinction |
| 650927 | M | Afar Regio A Level or l | 0 | 90  | N | Withdrawn   |
| 651058 | M | Sidamo Re A Level or l  | 0 | 90  | N | Fail        |
| 651156 | M | Sidamo Re A Level or l  | 0 | 120 | N | Withdrawn   |
| 651159 | M | Amhara Re A Level or l  | 0 | 120 | N | Distinction |
| 651187 | M | Sidamo Re A Level or l  | 0 | 150 | N | Withdrawn   |
| 651217 | M | Somalia Re A Level or l | 0 | 30  | N | Withdrawn   |
| 651236 | M | Somalia Re A Level or l | 0 | 30  | N | Fail        |
| 651267 | M | South Wes A Level or l  | 0 | 120 | N | Fail        |
| 651298 | M | Amhara Re HE Qualific   | 0 | 60  | N | Withdrawn   |
| 651325 | M | Amhara Re HE Qualific   | 0 | 90  | N | Withdrawn   |
| 651371 | M | South Regi A Level or l | 0 | 60  | N | Withdrawn   |
| 651423 | M | Amhara Re A Level or l  | 0 | 60  | N | Distinction |
| 651495 | M | North Regi HE Qualific  | 0 | 120 | N | Distinction |
| 651508 | F | Sidamo Re A Level or l  | 0 | 120 | N | Distinction |
| 651616 | M | South Regi Lower Tha    | 0 | 120 | N | Withdrawn   |
| 651651 | M | Oromia Re Lower Tha     | 0 | 120 | N | Withdrawn   |
| 651734 | M | Oromia Re Lower Tha     | 0 | 120 | N | Withdrawn   |
| 651759 | M | Sidamo Re HE Qualific   | 0 | 120 | N | Distinction |
| 651764 | M | Addis Abat A Level or l | 0 | 90  | N | Distinction |
| 651823 | M | South Regi A Level or l | 0 | 60  | N | Pass        |
| 651839 | M | North Regi A Level or l | 0 | 120 | N | Withdrawn   |
| 651850 | M | Addis Abat A Level or l | 0 | 90  | N | Withdrawn   |
| 651935 | F | South Regi A Level or l | 0 | 120 | N | Pass        |
| 651963 | M | Oromia Re Lower Tha     | 0 | 120 | N | Withdrawn   |
| 652023 | M | Addis Abat HE Qualific  | 0 | 30  | N | Pass        |
| 652406 | M | Oromia Re A Level or l  | 0 | 120 | N | Withdrawn   |
| 652428 | M | Tigrai Regi Lower Tha   | 0 | 120 | N | Fail        |
| 652501 | M | South Wes A Level or l  | 0 | 120 | N | Pass        |
| 652570 | M | Afar Regio HE Qualific  | 0 | 60  | N | Withdrawn   |
| 652571 | M | Sidamo Re A Level or l  | 0 | 60  | N | Withdrawn   |
| 652894 | M | North Regi A Level or l | 0 | 60  | N | Fail        |
| 652902 | M | Sidamo Re HE Qualific   | 0 | 120 | N | Distinction |
| 652945 | M | South Regi A Level or l | 0 | 120 | Y | Withdrawn   |
| 652971 | M | Oromia Re A Level or l  | 0 | 90  | N | Withdrawn   |
| 652994 | M | Amhara Re Lower Tha     | 0 | 120 | N | Withdrawn   |

|        |   |                          |   |     |   |             |
|--------|---|--------------------------|---|-----|---|-------------|
| 653062 | F | North Regi A Level or l  | 0 | 180 | N | Withdrawn   |
| 653115 | F | Sidamo Re HE Qualific    | 0 | 120 | N | Pass        |
| 653127 | F | Afar Regio HE Qualific   | 0 | 90  | N | Distinction |
| 653177 | F | South Regi HE Qualific   | 0 | 90  | N | Withdrawn   |
| 653278 | M | North Regi A Level or l  | 0 | 120 | N | Pass        |
| 653352 | M | Oromia Re A Level or l   | 0 | 90  | N | Withdrawn   |
| 653452 | F | South Wes A Level or l   | 0 | 120 | N | Pass        |
| 653506 | M | Oromia Re Lower Than     | 0 | 90  | N | Withdrawn   |
| 653700 | M | Tigrai Regi HE Qualific  | 0 | 60  | N | Fail        |
| 653726 | F | Sidamo Re A Level or l   | 0 | 60  | N | Withdrawn   |
| 653821 | F | Addis Abak No Formal     | 0 | 60  | N | Pass        |
| 653887 | M | Afar Regio HE Qualific   | 0 | 60  | N | Withdrawn   |
| 653977 | M | South Wes Lower Than     | 0 | 90  | N | Withdrawn   |
| 653998 | M | Afar Regio Lower Than    | 0 | 60  | N | Withdrawn   |
| 654000 | M | South Wes Post Gradu     | 0 | 120 | N | Pass        |
| 654002 | M | Tigrai Regi A Level or l | 0 | 150 | N | Distinction |
| 654016 | F | Afar Regio HE Qualific   | 0 | 30  | N | Pass        |
| 654031 | M | North Regi A Level or l  | 0 | 60  | Y | Pass        |
| 654095 | M | Addis Abak Lower Than    | 0 | 120 | N | Fail        |
| 654114 | M | Sidamo Re Lower Than     | 0 | 120 | N | Pass        |
| 654188 | F | Amhara Re A Level or l   | 0 | 120 | N | Fail        |
| 654202 | M | Oromia Re A Level or l   | 0 | 60  | N | Withdrawn   |
| 654258 | M | Sidamo Re A Level or l   | 0 | 30  | N | Withdrawn   |
| 654295 | F | South Wes A Level or l   | 0 | 90  | N | Withdrawn   |
| 654322 | M | Sidamo Re A Level or l   | 0 | 120 | Y | Distinction |
| 654407 | M | North Regi Lower Than    | 0 | 150 | N | Withdrawn   |
| 654504 | M | Afar Regio A Level or l  | 0 | 120 | N | Pass        |
| 654539 | F | Afar Regio Post Gradu    | 0 | 90  | N | Distinction |
| 654646 | M | South Regi Lower Than    | 0 | 30  | N | Distinction |
| 654671 | F | South Regi A Level or l  | 0 | 150 | Y | Withdrawn   |
| 654755 | M | Sidamo Re A Level or l   | 0 | 60  | N | Withdrawn   |
| 654817 | M | South Wes Post Gradu     | 0 | 60  | N | Distinction |
| 654828 | M | North Regi A Level or l  | 0 | 120 | N | Withdrawn   |
| 654888 | M | Somalia Re A Level or l  | 0 | 90  | N | Withdrawn   |
| 654915 | M | Oromia Re HE Qualific    | 0 | 30  | N | Distinction |
| 654960 | M | Addis Abak A Level or l  | 0 | 120 | N | Withdrawn   |
| 655051 | M | South Regi A Level or l  | 0 | 150 | N | Pass        |
| 655108 | M | South Regi Lower Than    | 0 | 120 | N | Pass        |
| 655293 | M | Tigrai Regi A Level or l | 0 | 120 | Y | Withdrawn   |
| 655353 | M | Sidamo Re HE Qualific    | 0 | 150 | N | Pass        |
| 655378 | M | Somalia Re A Level or l  | 0 | 60  | N | Pass        |
| 655390 | F | North Regi Lower Than    | 0 | 120 | N | Pass        |
| 655408 | M | Oromia Re A Level or l   | 0 | 60  | N | Withdrawn   |
| 655484 | M | Addis Abak A Level or l  | 0 | 90  | Y | Withdrawn   |
| 655498 | F | South Wes A Level or l   | 0 | 120 | N | Pass        |
| 655627 | M | Sidamo Re Lower Than     | 0 | 120 | N | Withdrawn   |
| 655761 | M | Somalia Re Lower Than    | 0 | 120 | N | Withdrawn   |



|        |   |                |               |   |     |   |             |
|--------|---|----------------|---------------|---|-----|---|-------------|
| 655890 | F | Afar Region    | A Level or I  | 0 | 30  | N | Distinction |
| 655919 | M | South Region   | Lower Than    | 0 | 60  | N | Pass        |
| 655927 | M | South West     | A Level or I  | 0 | 120 | N | Pass        |
| 655953 | F | South Region   | Lower Than    | 0 | 120 | Y | Withdrawn   |
| 655973 | M | Addis Ababa    | A Level or I  | 0 | 120 | N | Pass        |
| 655988 | M | Addis Ababa    | A Level or I  | 0 | 90  | N | Withdrawn   |
| 656026 | M | Sidamo Region  | Lower Than    | 0 | 120 | N | Withdrawn   |
| 656068 | M | Addis Ababa    | Lower Than    | 0 | 120 | N | Withdrawn   |
| 656203 | M | Addis Ababa    | A Level or I  | 0 | 90  | N | Fail        |
| 656277 | F | South West     | Post Graduate | 0 | 90  | N | Pass        |
| 656287 | F | Sidamo Region  | HE Qualific   | 0 | 60  | N | Distinction |
| 656340 | M | Amhara Region  | A Level or I  | 0 | 120 | N | Pass        |
| 656347 | M | North Region   | No Formal     | 0 | 60  | N | Pass        |
| 656535 | M | South Region   | A Level or I  | 0 | 120 | N | Withdrawn   |
| 656539 | F | North Region   | A Level or I  | 0 | 90  | N | Withdrawn   |
| 656634 | M | South West     | Lower Than    | 0 | 120 | N | Withdrawn   |
| 656642 | M | South West     | HE Qualific   | 0 | 30  | N | Pass        |
| 656683 | M | South Region   | HE Qualific   | 0 | 60  | N | Pass        |
| 656878 | F | Somalia Region | A Level or I  | 0 | 120 | N | Withdrawn   |
| 656929 | F | Sidamo Region  | A Level or I  | 0 | 210 | N | Fail        |
| 656954 | M | Amhara Region  | Lower Than    | 0 | 90  | N | Withdrawn   |
| 656978 | M | North Region   | Lower Than    | 0 | 120 | N | Withdrawn   |
| 657048 | M | Afar Region    | HE Qualific   | 0 | 120 | N | Withdrawn   |
| 657050 | F | North Region   | HE Qualific   | 0 | 90  | N | Distinction |
| 657145 | M | Amhara Region  | A Level or I  | 0 | 120 | N | Distinction |
| 657210 | M | Afar Region    | Lower Than    | 0 | 60  | N | Fail        |
| 657211 | M | South Region   | A Level or I  | 0 | 120 | N | Withdrawn   |
| 657285 | F | Amhara Region  | HE Qualific   | 0 | 60  | N | Distinction |
| 657319 | M | Addis Ababa    | Lower Than    | 0 | 180 | N | Withdrawn   |
| 657352 | M | Sidamo Region  | A Level or I  | 0 | 150 | N | Pass        |
| 665414 | M | Sidamo Region  | HE Qualific   | 0 | 30  | N | Distinction |
| 669530 | F | South Region   | HE Qualific   | 0 | 90  | N | Pass        |
| 674430 | M | Tigray Region  | A Level or I  | 0 | 60  | Y | Withdrawn   |
| 674497 | M | Tigray Region  | A Level or I  | 0 | 120 | N | Pass        |
| 674541 | M | North Region   | HE Qualific   | 0 | 30  | N | Distinction |
| 674699 | F | South Region   | No Formal     | 0 | 120 | N | Pass        |
| 674808 | F | Afar Region    | HE Qualific   | 0 | 60  | N | Pass        |
| 674814 | M | Somalia Region | Lower Than    | 0 | 240 | N | Withdrawn   |
| 674882 | M | Afar Region    | A Level or I  | 0 | 60  | N | Pass        |
| 674965 | M | North Region   | A Level or I  | 0 | 210 | N | Distinction |
| 675054 | M | Sidamo Region  | HE Qualific   | 0 | 120 | N | Pass        |
| 675063 | M | North Region   | HE Qualific   | 0 | 90  | N | Distinction |
| 675111 | M | North Region   | A Level or I  | 0 | 60  | N | Pass        |
| 675116 | F | Sidamo Region  | Lower Than    | 0 | 240 | N | Withdrawn   |
| 675374 | M | South Region   | HE Qualific   | 0 | 60  | N | Pass        |
| 675383 | M | South Region   | Lower Than    | 0 | 90  | N | Distinction |
| 675396 | M | North Region   | Lower Than    | 0 | 30  | N | Fail        |

|        |   |                          |   |     |   |             |
|--------|---|--------------------------|---|-----|---|-------------|
| 675441 | M | Oromia Re HE Qualific    | 0 | 60  | N | Fail        |
| 675442 | M | North Regi Lower Tha     | 0 | 60  | N | Withdrawn   |
| 675450 | M | Tigrai Regi A Level or I | 0 | 90  | N | Withdrawn   |
| 675477 | F | Tigrai Regi Lower Tha    | 0 | 30  | Y | Pass        |
| 675495 | M | Amhara Re Lower Tha      | 0 | 60  | N | Withdrawn   |
| 675504 | F | South Wes A Level or I   | 0 | 90  | N | Distinction |
| 675638 | F | Amhara Re HE Qualific    | 0 | 120 | N | Distinction |
| 675758 | M | Sidamo Re Lower Tha      | 0 | 60  | N | Withdrawn   |
| 675760 | F | Sidamo Re A Level or I   | 0 | 60  | N | Distinction |
| 675823 | M | North Regi HE Qualific   | 0 | 30  | N | Withdrawn   |
| 675875 | F | North Regi HE Qualific   | 0 | 210 | N | Distinction |
| 675902 | F | Sidamo Re Lower Tha      | 0 | 60  | N | Pass        |
| 675915 | F | South Wes A Level or I   | 0 | 150 | N | Fail        |
| 676138 | F | Tigrai Regi A Level or I | 0 | 120 | N | Withdrawn   |
| 676150 | M | Afar Regi A Level or I   | 0 | 60  | N | Fail        |
| 676366 | M | Tigrai Regi A Level or I | 0 | 120 | N | Withdrawn   |
| 676390 | M | South Regi HE Qualific   | 0 | 90  | N | Pass        |
| 676469 | M | Sidamo Re A Level or I   | 0 | 150 | N | Fail        |
| 676503 | M | Sidamo Re A Level or I   | 0 | 60  | N | Distinction |
| 676526 | M | Afar Regi A Level or I   | 0 | 90  | N | Fail        |
| 676538 | M | Sidamo Re Lower Tha      | 0 | 150 | N | Pass        |
| 676650 | M | North Regi Post Gradu    | 0 | 60  | N | Distinction |
| 676736 | F | Addis Abak Lower Tha     | 0 | 120 | N | Withdrawn   |
| 676760 | F | Sidamo Re Lower Tha      | 0 | 30  | N | Withdrawn   |
| 676783 | M | Sidamo Re HE Qualific    | 0 | 60  | N | Withdrawn   |
| 676884 | M | Somalia Re A Level or I  | 0 | 90  | N | Withdrawn   |
| 676909 | M | Addis Abak HE Qualific   | 0 | 60  | N | Distinction |
| 676916 | F | Sidamo Re A Level or I   | 0 | 180 | N | Pass        |
| 676964 | F | Addis Abak Lower Tha     | 0 | 120 | N | Pass        |
| 677006 | M | Tigrai Regi HE Qualific  | 0 | 90  | N | Pass        |
| 677018 | M | Sidamo Re A Level or I   | 0 | 120 | N | Pass        |
| 677085 | M | North Regi HE Qualific   | 0 | 150 | N | Pass        |
| 677089 | F | Somalia Re A Level or I  | 0 | 60  | N | Distinction |
| 677270 | M | Afar Regi Lower Tha      | 0 | 120 | N | Withdrawn   |
| 677323 | F | Sidamo Re Lower Tha      | 0 | 60  | N | Withdrawn   |
| 677349 | F | South Wes A Level or I   | 0 | 150 | N | Distinction |
| 677382 | M | Somalia Re A Level or I  | 0 | 120 | N | Withdrawn   |
| 677459 | M | Afar Regi HE Qualific    | 0 | 120 | N | Pass        |
| 677566 | F | Sidamo Re A Level or I   | 0 | 120 | N | Withdrawn   |
| 677641 | M | Amhara Re HE Qualific    | 0 | 60  | N | Distinction |
| 677721 | M | Afar Regi A Level or I   | 0 | 240 | N | Withdrawn   |
| 677741 | M | South Regi A Level or I  | 0 | 60  | N | Distinction |
| 677887 | M | Sidamo Re Lower Tha      | 0 | 90  | N | Withdrawn   |
| 678088 | M | South Regi Lower Tha     | 0 | 180 | N | Withdrawn   |
| 678089 | F | Addis Abak A Level or I  | 0 | 120 | N | Distinction |
| 678090 | M | Addis Abak Lower Tha     | 0 | 90  | N | Withdrawn   |
| 678194 | M | Tigrai Regi A Level or I | 0 | 60  | N | Fail        |

|        |   |                          |   |     |   |             |
|--------|---|--------------------------|---|-----|---|-------------|
| 678203 | M | Sidamo Re Lower Tha      | 0 | 120 | N | Pass        |
| 678204 | M | South Regi HE Qualific   | 0 | 120 | N | Pass        |
| 678339 | F | Amhara Re Lower Tha      | 0 | 120 | Y | Pass        |
| 678382 | M | South Wes Lower Tha      | 0 | 120 | N | Withdrawn   |
| 678393 | M | Afar Regio HE Qualific   | 0 | 60  | N | Fail        |
| 678395 | M | Somalia Re A Level or I  | 0 | 120 | N | Distinction |
| 678408 | F | South Wes Post Gradu     | 0 | 120 | N | Pass        |
| 678419 | M | Addis Abak HE Qualific   | 0 | 60  | N | Pass        |
| 678474 | M | Afar Regio A Level or I  | 0 | 120 | N | Fail        |
| 678538 | M | Tigrai Regi Lower Tha    | 0 | 90  | N | Withdrawn   |
| 678790 | M | Tigrai Regi A Level or I | 0 | 120 | N | Pass        |
| 678811 | F | North Regi Lower Tha     | 0 | 120 | N | Withdrawn   |
| 678843 | M | Afar Regio HE Qualific   | 0 | 60  | N | Withdrawn   |
| 678860 | M | Addis Abak HE Qualific   | 0 | 60  | N | Withdrawn   |
| 679037 | M | Sidamo Re HE Qualific    | 0 | 120 | N | Withdrawn   |
| 679039 | F | Oromia Re A Level or I   | 0 | 90  | N | Pass        |
| 679114 | F | South Regi A Level or I  | 0 | 120 | N | Withdrawn   |
| 679128 | F | Sidamo Re A Level or I   | 0 | 90  | N | Distinction |
| 679179 | M | Afar Regio HE Qualific   | 0 | 90  | N | Fail        |
| 679207 | M | Amhara Re Lower Tha      | 0 | 90  | N | Withdrawn   |
| 679271 | F | Somalia Re A Level or I  | 0 | 60  | N | Withdrawn   |
| 679325 | F | South Regi Lower Tha     | 0 | 120 | N | Withdrawn   |
| 679363 | M | Afar Regio Lower Tha     | 0 | 60  | N | Fail        |
| 679386 | M | South Wes Lower Tha      | 0 | 120 | N | Pass        |
| 679431 | M | Sidamo Re A Level or I   | 0 | 150 | N | Distinction |
| 679451 | F | Sidamo Re Lower Tha      | 0 | 60  | N | Distinction |
| 679468 | M | North Regi Post Gradu    | 0 | 120 | N | Withdrawn   |
| 679529 | M | Tigrai Regi Lower Tha    | 0 | 90  | N | Withdrawn   |
| 679539 | F | South Regi Lower Tha     | 0 | 60  | N | Fail        |
| 679569 | M | Afar Regio HE Qualific   | 0 | 60  | N | Fail        |
| 679599 | F | Amhara Re A Level or I   | 0 | 120 | N | Withdrawn   |
| 679663 | M | Afar Regio A Level or I  | 0 | 30  | N | Pass        |
| 679733 | M | Tigrai Regi Lower Tha    | 0 | 150 | N | Distinction |
| 679750 | M | South Regi Lower Tha     | 0 | 30  | N | Pass        |
| 679886 | M | Sidamo Re HE Qualific    | 0 | 60  | N | Distinction |
| 679939 | M | Addis Abak A Level or I  | 0 | 120 | N | Pass        |
| 679959 | M | South Wes HE Qualific    | 0 | 120 | N | Pass        |
| 680002 | F | Afar Regio A Level or I  | 0 | 120 | Y | Distinction |
| 680027 | M | Sidamo Re A Level or I   | 0 | 120 | Y | Distinction |
| 680133 | F | Afar Regio HE Qualific   | 0 | 60  | N | Distinction |
| 680145 | M | Amhara Re Lower Tha      | 0 | 90  | Y | Withdrawn   |
| 680187 | F | South Wes HE Qualific    | 0 | 60  | N | Pass        |
| 680222 | F | Oromia Re Lower Tha      | 0 | 180 | N | Withdrawn   |
| 680267 | M | Afar Regio A Level or I  | 0 | 60  | N | Pass        |
| 680333 | M | North Regi HE Qualific   | 0 | 150 | N | Withdrawn   |
| 680492 | M | Sidamo Re HE Qualific    | 0 | 90  | N | Pass        |
| 680602 | M | Sidamo Re A Level or I   | 0 | 60  | N | Pass        |

|        |   |                                  |   |     |   |             |
|--------|---|----------------------------------|---|-----|---|-------------|
| 680687 | M | Tigrai Region HE Qualification   | 0 | 60  | N | Distinction |
| 680698 | M | Addis Ababa A Level or Higher    | 0 | 120 | N | Withdrawn   |
| 680765 | F | Sidamo Region Lower Than         | 0 | 120 | N | Fail        |
| 680804 | M | South West HE Qualification      | 0 | 60  | N | Pass        |
| 680890 | F | South Region A Level or Higher   | 0 | 60  | N | Withdrawn   |
| 681165 | F | Oromia Region A Level or Higher  | 0 | 30  | N | Pass        |
| 681174 | M | North Region Post Graduate       | 0 | 90  | N | Distinction |
| 681235 | F | South Region Lower Than          | 0 | 120 | N | Pass        |
| 681302 | M | Amhara Region HE Qualification   | 0 | 60  | N | Pass        |
| 681335 | M | Amhara Region Lower Than         | 0 | 120 | N | Withdrawn   |
| 681642 | M | South West A Level or Higher     | 0 | 120 | N | Pass        |
| 681704 | M | Sidamo Region Lower Than         | 0 | 60  | N | Withdrawn   |
| 681731 | F | South West A Level or Higher     | 0 | 30  | Y | Distinction |
| 681789 | M | South Region Lower Than          | 0 | 60  | N | Withdrawn   |
| 681844 | M | Addis Ababa Lower Than           | 0 | 60  | N | Withdrawn   |
| 681966 | M | Tigrai Region A Level or Higher  | 0 | 90  | N | Withdrawn   |
| 682041 | M | South West Lower Than            | 0 | 120 | N | Withdrawn   |
| 682212 | M | South West Lower Than            | 0 | 60  | N | Withdrawn   |
| 682226 | M | Afar Region A Level or Higher    | 0 | 30  | N | Withdrawn   |
| 682259 | M | Tigrai Region A Level or Higher  | 0 | 60  | N | Fail        |
| 682301 | M | Amhara Region A Level or Higher  | 0 | 120 | N | Pass        |
| 682309 | M | North Region Lower Than          | 0 | 60  | Y | Withdrawn   |
| 682367 | F | Somalia Region A Level or Higher | 0 | 90  | N | Distinction |
| 682414 | M | Sidamo Region A Level or Higher  | 0 | 120 | N | Withdrawn   |
| 682511 | M | South West A Level or Higher     | 0 | 120 | N | Pass        |
| 682565 | M | Somalia Region Lower Than        | 0 | 240 | N | Withdrawn   |
| 682569 | M | South Region A Level or Higher   | 0 | 120 | N | Pass        |
| 682717 | M | Afar Region HE Qualification     | 0 | 150 | N | Fail        |
| 682738 | F | Sidamo Region A Level or Higher  | 0 | 90  | N | Fail        |
| 682961 | M | North Region Lower Than          | 0 | 60  | N | Distinction |
| 683073 | M | Afar Region HE Qualification     | 0 | 90  | N | Withdrawn   |
| 683203 | F | Sidamo Region A Level or Higher  | 0 | 30  | N | Withdrawn   |
| 683220 | F | Sidamo Region A Level or Higher  | 0 | 180 | N | Withdrawn   |
| 683373 | M | Sidamo Region A Level or Higher  | 0 | 90  | N | Distinction |
| 683406 | F | South Region HE Qualification    | 0 | 30  | N | Withdrawn   |
| 683449 | F | Sidamo Region Lower Than         | 0 | 120 | Y | Withdrawn   |
| 683503 | M | Afar Region Lower Than           | 0 | 60  | N | Withdrawn   |
| 683625 | M | Addis Ababa A Level or Higher    | 0 | 120 | N | Pass        |
| 683668 | F | South West Post Graduate         | 0 | 90  | N | Distinction |
| 683777 | F | Addis Ababa HE Qualification     | 0 | 30  | N | Pass        |
| 683865 | M | Afar Region Post Graduate        | 0 | 30  | N | Fail        |
| 683912 | F | South Region A Level or Higher   | 0 | 120 | N | Withdrawn   |
| 684111 | M | South Region HE Qualification    | 0 | 60  | N | Pass        |
| 684208 | M | Afar Region HE Qualification     | 0 | 60  | N | Fail        |
| 684270 | M | Oromia Region A Level or Higher  | 0 | 60  | N | Fail        |
| 684313 | M | Addis Ababa Lower Than           | 0 | 120 | N | Withdrawn   |
| 684444 | M | Afar Region Lower Than           | 0 | 60  | N | Pass        |

|        |   |                          |   |     |   |             |
|--------|---|--------------------------|---|-----|---|-------------|
| 684498 | M | Amhara Re A Level or I   | 0 | 90  | N | Fail        |
| 684511 | M | South Regi Lower Tha     | 0 | 90  | N | Withdrawn   |
| 684514 | M | Tigrai Regi A Level or I | 0 | 150 | N | Pass        |
| 684617 | M | North Regi A Level or I  | 0 | 60  | N | Fail        |
| 684643 | M | North Regi Lower Tha     | 0 | 30  | N | Fail        |
| 684663 | M | Afar Regio Lower Tha     | 0 | 120 | Y | Fail        |
| 684669 | M | North Regi HE Qualific   | 0 | 90  | N | Pass        |
| 684709 | M | Somalia Re A Level or I  | 0 | 60  | N | Distinction |
| 684905 | M | Sidamo Re A Level or I   | 0 | 60  | N | Pass        |
| 684944 | M | South Regi Lower Tha     | 0 | 90  | N | Withdrawn   |
| 684990 | M | North Regi Lower Tha     | 0 | 30  | N | Fail        |
| 685015 | M | South Regi A Level or I  | 0 | 150 | N | Withdrawn   |
| 685098 | M | North Regi Post Gradu    | 0 | 30  | N | Distinction |
| 685206 | M | Sidamo Re A Level or I   | 0 | 120 | N | Distinction |
| 685212 | M | South Regi HE Qualific   | 0 | 120 | N | Pass        |
| 685236 | M | Tigrai Regi HE Qualific  | 0 | 60  | N | Withdrawn   |
| 685287 | M | South Wes HE Qualific    | 0 | 60  | N | Pass        |
| 685289 | F | Sidamo Re A Level or I   | 0 | 90  | N | Withdrawn   |
| 685399 | M | Afar Regio A Level or I  | 0 | 60  | N | Fail        |
| 685412 | M | Addis Abat A Level or I  | 0 | 120 | N | Distinction |
| 685458 | M | Amhara Re Lower Tha      | 0 | 120 | N | Pass        |
| 685474 | M | North Regi HE Qualific   | 0 | 90  | N | Withdrawn   |
| 685487 | F | South Wes Lower Tha      | 0 | 60  | Y | Distinction |
| 685514 | M | Addis Abat HE Qualific   | 0 | 30  | N | Pass        |
| 685557 | M | Afar Regio HE Qualific   | 0 | 60  | N | Fail        |
| 685572 | F | Somalia Re A Level or I  | 0 | 150 | N | Pass        |
| 685597 | M | Afar Regio Lower Tha     | 0 | 90  | N | Pass        |
| 685619 | M | Afar Regio HE Qualific   | 0 | 105 | Y | Withdrawn   |
| 685663 | F | Oromia Re A Level or I   | 0 | 90  | N | Withdrawn   |
| 685705 | M | Sidamo Re A Level or I   | 0 | 120 | N | Withdrawn   |
| 685750 | F | Afar Regio A Level or I  | 0 | 180 | Y | Withdrawn   |
| 685802 | M | South Wes Lower Tha      | 0 | 120 | N | Withdrawn   |
| 685849 | M | South Wes HE Qualific    | 0 | 60  | N | Pass        |
| 685860 | M | Addis Abat A Level or I  | 0 | 210 | N | Withdrawn   |
| 685871 | M | South Regi A Level or I  | 0 | 90  | N | Distinction |
| 685950 | M | Afar Regio Lower Tha     | 0 | 120 | N | Pass        |
| 685952 | M | Sidamo Re A Level or I   | 0 | 120 | N | Fail        |
| 685964 | M | North Regi Lower Tha     | 0 | 120 | N | Distinction |
| 685988 | F | North Regi HE Qualific   | 0 | 150 | N | Withdrawn   |
| 686001 | M | South Regi A Level or I  | 0 | 60  | N | Distinction |
| 686003 | F | South Wes A Level or I   | 0 | 210 | N | Withdrawn   |
| 686018 | M | North Regi HE Qualific   | 0 | 90  | N | Distinction |
| 686034 | M | Sidamo Re A Level or I   | 0 | 90  | N | Withdrawn   |
| 686058 | F | North Regi Lower Tha     | 0 | 120 | N | Distinction |
| 686071 | M | Afar Regio Post Gradu    | 0 | 60  | N | Withdrawn   |
| 686110 | M | North Regi Lower Tha     | 0 | 120 | N | Pass        |
| 686268 | M | South Regi A Level or I  | 0 | 120 | N | Pass        |

|        |   |                          |   |     |   |             |
|--------|---|--------------------------|---|-----|---|-------------|
| 686411 | F | Afar Region HE Qualific  | 0 | 60  | N | Distinction |
| 686515 | F | South Regi HE Qualific   | 0 | 120 | N | Distinction |
| 686558 | M | Somalia Re A Level or I  | 0 | 120 | N | Pass        |
| 686584 | F | Amhara Re A Level or I   | 0 | 120 | Y | Pass        |
| 686645 | M | Oromia Re A Level or I   | 0 | 120 | N | Distinction |
| 686797 | M | Amhara Re A Level or I   | 0 | 60  | N | Withdrawn   |
| 686813 | M | Sidamo Re Lower Than     | 0 | 150 | Y | Withdrawn   |
| 686877 | M | South Regi A Level or I  | 0 | 150 | N | Withdrawn   |
| 686907 | F | North Regi Post Gradu    | 0 | 90  | N | Pass        |
| 686957 | M | Addis Abat HE Qualific   | 0 | 30  | N | Pass        |
| 687023 | F | Sidamo Re A Level or I   | 0 | 120 | N | Pass        |
| 687146 | M | Oromia Re Lower Than     | 0 | 90  | N | Withdrawn   |
| 687160 | M | South Regi A Level or I  | 0 | 90  | N | Distinction |
| 687190 | F | Addis Abat A Level or I  | 0 | 60  | N | Distinction |
| 687206 | M | Afar Region HE Qualific  | 0 | 30  | N | Distinction |
| 687216 | M | Sidamo Re HE Qualific    | 0 | 30  | N | Distinction |
| 687283 | M | Addis Abat A Level or I  | 0 | 60  | N | Withdrawn   |
| 687310 | M | South Regi HE Qualific   | 0 | 60  | N | Fail        |
| 687319 | M | South Regi Lower Than    | 0 | 240 | N | Withdrawn   |
| 687345 | M | South Regi A Level or I  | 0 | 90  | N | Withdrawn   |
| 687348 | F | Sidamo Re Lower Than     | 0 | 120 | Y | Withdrawn   |
| 687686 | M | South Regi A Level or I  | 0 | 120 | N | Pass        |
| 687772 | M | North Regi A Level or I  | 0 | 60  | N | Distinction |
| 687844 | F | South Wes HE Qualific    | 0 | 90  | N | Withdrawn   |
| 687877 | M | Afar Region Post Gradu   | 0 | 30  | N | Pass        |
| 687953 | M | Addis Abat A Level or I  | 0 | 60  | N | Withdrawn   |
| 687981 | M | Amhara Re Lower Than     | 0 | 90  | N | Pass        |
| 688028 | F | South Regi A Level or I  | 0 | 120 | N | Withdrawn   |
| 688033 | M | Sidamo Re No Formal      | 0 | 120 | N | Fail        |
| 688117 | F | North Regi A Level or I  | 0 | 120 | N | Withdrawn   |
| 688171 | M | South Regi A Level or I  | 0 | 120 | Y | Withdrawn   |
| 688271 | M | South Wes A Level or I   | 0 | 120 | N | Withdrawn   |
| 688281 | F | Afar Region A Level or I | 0 | 120 | N | Distinction |
| 688297 | M | South Wes A Level or I   | 0 | 120 | N | Withdrawn   |
| 688337 | M | South Wes A Level or I   | 0 | 120 | N | Pass        |
| 688356 | M | Addis Abat A Level or I  | 0 | 90  | N | Pass        |
| 688521 | M | Addis Abat A Level or I  | 0 | 120 | N | Distinction |
| 688533 | M | Somalia Re A Level or I  | 0 | 30  | Y | Withdrawn   |
| 688537 | F | South Regi A Level or I  | 0 | 120 | N | Fail        |
| 688672 | M | Sidamo Re Lower Than     | 0 | 90  | N | Withdrawn   |
| 688683 | M | North Regi A Level or I  | 0 | 150 | N | Withdrawn   |
| 688707 | M | North Regi HE Qualific   | 0 | 30  | N | Fail        |
| 688770 | M | Amhara Re A Level or I   | 0 | 120 | N | Pass        |
| 688776 | M | Somalia Re A Level or I  | 0 | 120 | Y | Withdrawn   |
| 688843 | F | Addis Abat A Level or I  | 0 | 180 | N | Withdrawn   |
| 689004 | M | Sidamo Re HE Qualific    | 0 | 90  | N | Distinction |
| 689042 | M | South Regi Lower Than    | 0 | 90  | N | Withdrawn   |

|        |   |                         |   |     |   |             |
|--------|---|-------------------------|---|-----|---|-------------|
| 689050 | M | South Regi HE Qualific  | 0 | 120 | N | Distinction |
| 689101 | F | Addis Abak Post Gradu   | 0 | 30  | N | Fail        |
| 689143 | M | Sidamo Re A Level or I  | 0 | 120 | N | Withdrawn   |
| 689164 | F | Addis Abak A Level or I | 0 | 60  | N | Pass        |
| 689190 | F | Oromia Re A Level or I  | 0 | 90  | N | Pass        |
| 689217 | M | Afar Regio HE Qualific  | 0 | 60  | N | Pass        |
| 689246 | F | Afar Regio A Level or I | 0 | 90  | N | Pass        |
| 689264 | M | Addis Abak Lower Thar   | 0 | 120 | N | Withdrawn   |
| 689346 | F | Amhara Re A Level or I  | 0 | 120 | Y | Withdrawn   |
| 689352 | M | Sidamo Re A Level or I  | 0 | 120 | N | Withdrawn   |
| 689399 | F | South Wes HE Qualific   | 0 | 90  | N | Pass        |
| 689436 | M | Addis Abak A Level or I | 0 | 120 | N | Withdrawn   |
| 689527 | F | Afar Regio HE Qualific  | 0 | 120 | N | Fail        |
| 689637 | F | Sidamo Re A Level or I  | 0 | 90  | N | Distinction |
| 689759 | M | Afar Regio Lower Thar   | 0 | 120 | N | Pass        |
| 689792 | F | Oromia Re A Level or I  | 0 | 60  | N | Pass        |
| 689807 | M | Sidamo Re A Level or I  | 0 | 120 | N | Withdrawn   |
| 689855 | M | South Wes A Level or I  | 0 | 150 | N | Distinction |
| 690046 | M | South Wes HE Qualific   | 0 | 30  | N | Withdrawn   |
| 690062 | F | South Wes A Level or I  | 0 | 150 | N | Pass        |
| 690365 | M | Afar Regio Lower Thar   | 0 | 90  | N | Pass        |
| 690404 | F | Afar Regio A Level or I | 0 | 60  | N | Pass        |
| 690406 | M | Sidamo Re No Formal     | 0 | 120 | N | Withdrawn   |
| 690439 | M | North Regi Lower Thar   | 0 | 90  | N | Fail        |
| 690507 | M | Afar Regio A Level or I | 0 | 60  | N | Pass        |
| 690589 | F | Afar Regio A Level or I | 0 | 120 | N | Fail        |
| 690631 | M | Afar Regio A Level or I | 0 | 240 | N | Withdrawn   |
| 690644 | M | Sidamo Re A Level or I  | 0 | 120 | N | Pass        |
| 690695 | M | North Regi Lower Thar   | 0 | 60  | N | Withdrawn   |
| 690724 | M | South Regi No Formal    | 0 | 90  | N | Withdrawn   |
| 690733 | M | South Wes HE Qualific   | 0 | 120 | N | Distinction |
| 690763 | M | South Regi Lower Thar   | 0 | 60  | N | Fail        |
| 690948 | M | Addis Abak Lower Thar   | 0 | 60  | N | Fail        |
| 690962 | M | Oromia Re A Level or I  | 0 | 180 | N | Withdrawn   |
| 691008 | M | Amhara Re A Level or I  | 0 | 120 | N | Withdrawn   |
| 691056 | M | Amhara Re Lower Thar    | 0 | 180 | N | Withdrawn   |
| 691069 | F | North Regi Post Gradu   | 0 | 90  | N | Pass        |
| 691177 | M | South Regi A Level or I | 0 | 120 | N | Fail        |
| 691195 | M | Somalia Re A Level or I | 0 | 120 | N | Fail        |
| 691218 | M | South Wes Lower Thar    | 0 | 60  | N | Fail        |
| 691257 | F | Sidamo Re A Level or I  | 0 | 120 | N | Withdrawn   |
| 691433 | F | Afar Regio HE Qualific  | 0 | 90  | N | Fail        |
| 691550 | M | Oromia Re Post Gradu    | 0 | 90  | N | Distinction |
| 691843 | F | Afar Regio A Level or I | 0 | 30  | N | Pass        |
| 691926 | M | North Regi HE Qualific  | 0 | 30  | N | Pass        |
| 691931 | F | North Regi A Level or I | 0 | 120 | N | Pass        |
| 692105 | M | Afar Regio HE Qualific  | 0 | 60  | N | Distinction |

|        |   |                           |   |     |   |             |
|--------|---|---------------------------|---|-----|---|-------------|
| 692179 | M | Tigray Region A Level or  | 0 | 60  | N | Withdrawn   |
| 692219 | M | South Region A Level or   | 0 | 90  | N | Withdrawn   |
| 692363 | M | Addis Ababa A Level or    | 0 | 60  | N | Withdrawn   |
| 692490 | F | South Region A Level or   | 0 | 30  | N | Pass        |
| 692500 | M | South West A Level or     | 0 | 150 | N | Withdrawn   |
| 692603 | F | Addis Ababa A Level or    | 0 | 120 | Y | Distinction |
| 692654 | F | Sidamo Region HE Qualific | 0 | 30  | N | Pass        |
| 692850 | F | South West HE Qualific    | 0 | 120 | N | Withdrawn   |
| 692928 | M | South West HE Qualific    | 0 | 60  | N | Pass        |
| 692933 | M | South West HE Qualific    | 0 | 30  | N | Withdrawn   |
| 693058 | M | Afar Region A Level or    | 0 | 120 | N | Distinction |
| 693111 | M | Afar Region HE Qualific   | 0 | 120 | N | Withdrawn   |
| 693141 | F | Addis Ababa A Level or    | 0 | 60  | N | Pass        |
| 693147 | M | Somalia Region A Level or | 0 | 120 | N | Withdrawn   |
| 693182 | M | Afar Region HE Qualific   | 0 | 30  | N | Pass        |
| 693204 | M | Sidamo Region A Level or  | 0 | 120 | N | Pass        |
| 693302 | F | North Region HE Qualific  | 0 | 30  | N | Distinction |
| 693340 | F | South West Lower Than     | 0 | 90  | N | Withdrawn   |
| 693456 | M | Sidamo Region Lower Than  | 0 | 120 | N | Withdrawn   |
| 693747 | M | Afar Region Lower Than    | 0 | 60  | N | Pass        |
| 693812 | M | Sidamo Region No Formal   | 0 | 240 | N | Withdrawn   |
| 693836 | M | Amhara Region Lower Than  | 0 | 120 | N | Withdrawn   |
| 693910 | M | Sidamo Region A Level or  | 0 | 90  | N | Withdrawn   |
| 693938 | M | South Region Lower Than   | 0 | 60  | Y | Pass        |
| 693998 | M | North Region Lower Than   | 0 | 90  | N | Withdrawn   |
| 694103 | M | Afar Region A Level or    | 0 | 90  | N | Pass        |
| 694147 | M | Sidamo Region A Level or  | 0 | 180 | N | Withdrawn   |
| 694150 | M | Oromia Region A Level or  | 0 | 90  | N | Withdrawn   |
| 694212 | F | Sidamo Region HE Qualific | 0 | 120 | N | Withdrawn   |
| 694361 | M | Afar Region A Level or    | 0 | 90  | N | Withdrawn   |
| 694362 | F | Afar Region A Level or    | 0 | 30  | N | Distinction |
| 694472 | F | Sidamo Region A Level or  | 0 | 150 | N | Pass        |
| 694510 | M | Sidamo Region A Level or  | 0 | 120 | N | Fail        |
| 694523 | M | Afar Region HE Qualific   | 0 | 120 | N | Distinction |
| 694536 | M | Oromia Region A Level or  | 0 | 120 | N | Withdrawn   |
| 694563 | M | Amhara Region A Level or  | 0 | 60  | N | Withdrawn   |
| 694579 | M | South Region A Level or   | 0 | 120 | N | Pass        |
| 694680 | M | South Region HE Qualific  | 0 | 60  | N | Pass        |
| 694705 | M | South Region Lower Than   | 0 | 180 | Y | Withdrawn   |
| 694726 | M | Afar Region A Level or    | 0 | 90  | N | Pass        |
| 694807 | M | South Region HE Qualific  | 0 | 60  | N | Withdrawn   |
| 694860 | M | South West Post Gradu     | 0 | 60  | N | Distinction |
| 694871 | M | North Region Lower Than   | 0 | 120 | N | Withdrawn   |
| 694914 | M | Sidamo Region HE Qualific | 0 | 210 | N | Withdrawn   |
| 695122 | M | Addis Ababa A Level or    | 0 | 90  | N | Withdrawn   |
| 695232 | M | Sidamo Region A Level or  | 0 | 120 | N | Distinction |
| 695270 | M | South West A Level or     | 0 | 120 | N | Pass        |



|        |   |                         |   |     |   |             |
|--------|---|-------------------------|---|-----|---|-------------|
| 695340 | F | Somalia Re A Level or I | 0 | 60  | N | Withdrawn   |
| 695354 | F | Somalia Re A Level or I | 0 | 120 | Y | Distinction |
| 695369 | F | Amhara Re Lower Than    | 0 | 120 | N | Withdrawn   |
| 695518 | M | Sidamo Re A Level or I  | 0 | 120 | N | Pass        |
| 695643 | F | South Regi A Level or I | 0 | 150 | Y | Withdrawn   |
| 695653 | M | Oromia Re A Level or I  | 0 | 60  | N | Fail        |
| 695673 | M | North Regi A Level or I | 0 | 150 | N | Distinction |
| 695732 | F | North Regi Post Gradu   | 0 | 60  | N | Distinction |
| 695760 | M | Somalia Re A Level or I | 0 | 120 | N | Withdrawn   |
| 695874 | M | South Wes HE Qualific   | 0 | 60  | N | Withdrawn   |
| 695915 | M | Somalia Re A Level or I | 0 | 60  | N | Fail        |
| 695946 | M | South Wes HE Qualific   | 0 | 60  | N | Pass        |
| 695976 | F | North Regi Lower Than   | 0 | 210 | N | Withdrawn   |
| 696019 | M | Sidamo Re A Level or I  | 0 | 60  | N | Withdrawn   |
| 696234 | M | Tigrai Regi HE Qualific | 0 | 120 | N | Withdrawn   |
| 696253 | M | South Wes Lower Than    | 0 | 120 | Y | Withdrawn   |
| 696271 | M | Tigrai Regi HE Qualific | 0 | 60  | N | Distinction |
| 696324 | M | Afar Regio HE Qualific  | 0 | 120 | N | Withdrawn   |
| 696357 | M | Addis Abat A Level or I | 0 | 30  | Y | Pass        |
| 696469 | M | South Wes HE Qualific   | 0 | 90  | N | Distinction |
| 696501 | M | North Regi A Level or I | 0 | 120 | Y | Withdrawn   |
| 696515 | F | Sidamo Re Lower Than    | 0 | 120 | N | Pass        |
| 696696 | F | South Wes A Level or I  | 0 | 60  | N | Distinction |
| 696833 | M | Afar Regio A Level or I | 0 | 90  | Y | Pass        |
| 696848 | M | North Regi Post Gradu   | 0 | 120 | N | Withdrawn   |
| 696869 | F | South Wes Post Gradu    | 0 | 60  | N | Pass        |
| 696930 | M | Sidamo Re A Level or I  | 0 | 120 | N | Withdrawn   |
| 697120 | M | South Regi HE Qualific  | 0 | 120 | N | Withdrawn   |
| 697253 | M | Afar Regio HE Qualific  | 0 | 60  | N | Withdrawn   |
| 697283 | F | Sidamo Re A Level or I  | 0 | 120 | N | Withdrawn   |
| 697460 | M | Afar Regio HE Qualific  | 0 | 60  | N | Fail        |
| 697490 | M | South Wes A Level or I  | 0 | 180 | N | Withdrawn   |
| 697511 | F | South Wes A Level or I  | 0 | 120 | N | Withdrawn   |
| 697554 | M | Sidamo Re A Level or I  | 0 | 240 | N | Withdrawn   |
| 697567 | M | Oromia Re A Level or I  | 0 | 90  | N | Distinction |
| 697948 | F | Sidamo Re A Level or I  | 0 | 150 | Y | Withdrawn   |
| 697998 | M | Addis Abat Lower Than   | 0 | 120 | N | Withdrawn   |
| 698002 | M | Oromia Re HE Qualific   | 0 | 60  | N | Distinction |
| 698024 | M | Afar Regio A Level or I | 0 | 120 | Y | Fail        |
| 698112 | M | South Wes A Level or I  | 0 | 120 | N | Withdrawn   |
| 698299 | M | Sidamo Re HE Qualific   | 0 | 30  | N | Distinction |
| 698355 | M | North Regi Lower Than   | 0 | 120 | N | Distinction |
| 698359 | F | South Wes HE Qualific   | 0 | 90  | N | Pass        |
| 698598 | F | Afar Regio HE Qualific  | 0 | 120 | N | Withdrawn   |
| 699370 | M | Afar Regio A Level or I | 0 | 30  | N | Fail        |
| 857856 | M | South Wes A Level or I  | 0 | 60  | N | Withdrawn   |
| 921739 | M | Afar Regio HE Qualific  | 0 | 150 | N | Withdrawn   |

|         |   |                             |   |     |   |             |
|---------|---|-----------------------------|---|-----|---|-------------|
| 941282  | M | Afar Region HE Qualific     | 0 | 30  | N | Distinction |
| 943374  | M | Afar Region Lower Than      | 0 | 30  | N | Fail        |
| 973526  | M | South Region HE Qualific    | 0 | 30  | N | Withdrawn   |
| 986561  | M | Oromia Region HE Qualific   | 0 | 60  | N | Pass        |
| 1023623 | M | Addis Ababa A Level or I    | 0 | 120 | N | Pass        |
| 1031884 | M | Somalia Region A Level or I | 0 | 60  | N | Distinction |
| 1068316 | M | Afar Region A Level or I    | 0 | 60  | N | Fail        |
| 1076015 | M | Afar Region A Level or I    | 0 | 60  | N | Pass        |
| 1078701 | F | South West HE Qualific      | 0 | 90  | N | Pass        |
| 1091274 | M | Tigray Region HE Qualific   | 0 | 60  | N | Fail        |
| 1101190 | M | Amhara Region HE Qualific   | 0 | 60  | N | Pass        |
| 1118218 | M | Somalia Region A Level or I | 0 | 180 | N | Withdrawn   |
| 1301103 | M | Somalia Region A Level or I | 0 | 240 | N | Pass        |
| 1307784 | F | Sidamo Region HE Qualific   | 1 | 60  | N | Withdrawn   |
| 1332356 | M | Somalia Region HE Qualific  | 0 | 30  | N | Pass        |
| 1332514 | M | Tigray Region A Level or I  | 0 | 60  | N | Withdrawn   |
| 1340760 | M | South Region Lower Than     | 0 | 60  | N | Withdrawn   |
| 1345808 | F | Afar Region HE Qualific     | 0 | 30  | N | Withdrawn   |
| 1352733 | M | Amhara Region HE Qualific   | 0 | 60  | N | Distinction |
| 1360953 | M | North Region HE Qualific    | 0 | 120 | N | Distinction |
| 1407549 | F | Addis Ababa A Level or I    | 1 | 220 | N | Withdrawn   |
| 1425806 | M | South West HE Qualific      | 1 | 60  | N | Withdrawn   |
| 1439723 | M | Somalia Region Lower Than   | 0 | 60  | N | Withdrawn   |
| 1442981 | M | Somalia Region A Level or I | 0 | 150 | N | Pass        |
| 1449245 | F | Afar Region HE Qualific     | 0 | 30  | N | Fail        |
| 1461795 | M | North Region Lower Than     | 0 | 30  | N | Fail        |
| 1468838 | F | South West Lower Than       | 1 | 30  | N | Withdrawn   |
| 1474903 | M | Afar Region HE Qualific     | 0 | 60  | N | Pass        |
| 1478030 | M | Sidamo Region HE Qualific   | 0 | 30  | N | Fail        |
| 1478775 | F | Addis Ababa Lower Than      | 0 | 120 | N | Pass        |
| 1483632 | M | Tigray Region HE Qualific   | 0 | 90  | N | Pass        |
| 1485702 | F | Addis Ababa A Level or I    | 0 | 90  | N | Pass        |
| 1490624 | M | Addis Ababa HE Qualific     | 0 | 60  | N | Distinction |
| 1491894 | M | South West HE Qualific      | 0 | 30  | Y | Withdrawn   |
| 1501577 | M | South West A Level or I     | 0 | 120 | N | Distinction |
| 1501614 | M | Afar Region Lower Than      | 0 | 90  | N | Pass        |
| 1529458 | F | South Region Lower Than     | 0 | 30  | N | Withdrawn   |
| 1532840 | M | Addis Ababa A Level or I    | 0 | 60  | N | Withdrawn   |
| 1552044 | M | South Region A Level or I   | 0 | 30  | N | Pass        |
| 1554143 | M | Sidamo Region A Level or I  | 0 | 60  | N | Withdrawn   |
| 1559964 | M | Addis Ababa Lower Than      | 0 | 90  | N | Withdrawn   |
| 1561750 | F | Afar Region Lower Than      | 1 | 60  | N | Fail        |
| 1564630 | F | Somalia Region Lower Than   | 0 | 90  | N | Pass        |
| 1583847 | F | Tigray Region A Level or I  | 0 | 30  | N | Withdrawn   |
| 1592048 | M | Tigray Region HE Qualific   | 0 | 60  | N | Distinction |
| 1593442 | M | South West HE Qualific      | 0 | 60  | N | Pass        |
| 1612600 | M | Oromia Region Lower Than    | 0 | 60  | N | Withdrawn   |

|         |   |                          |   |     |   |             |
|---------|---|--------------------------|---|-----|---|-------------|
| 1634278 | M | Sidamo Re Lower Tha      | 0 | 60  | N | Withdrawn   |
| 1638548 | M | Afar Region A Level or I | 1 | 120 | N | Withdrawn   |
| 1639743 | F | South Wes Lower Tha      | 0 | 60  | N | Withdrawn   |
| 1646172 | M | Sidamo Re A Level or I   | 0 | 30  | N | Pass        |
| 1656486 | F | Oromia Re HE Qualific    | 1 | 30  | N | Withdrawn   |
| 1658963 | M | Addis Abak A Level or I  | 0 | 150 | N | Pass        |
| 1671022 | M | Sidamo Re HE Qualific    | 0 | 60  | N | Distinction |
| 1674799 | M | South Regi HE Qualific   | 0 | 60  | N | Pass        |
| 1681946 | M | South Regi A Level or I  | 0 | 60  | N | Withdrawn   |
| 1692156 | M | Addis Abak A Level or I  | 0 | 120 | Y | Pass        |
| 1719166 | M | South Wes Lower Tha      | 0 | 60  | N | Withdrawn   |
| 1738582 | F | South Regi HE Qualific   | 0 | 120 | Y | Distinction |
| 1744800 | M | Afar Region HE Qualific  | 1 | 150 | N | Withdrawn   |
| 1752098 | F | Amhara Re A Level or I   | 0 | 30  | N | Pass        |
| 1752813 | F | South Wes HE Qualific    | 0 | 60  | N | Distinction |
| 1773925 | F | Tigrai Regi HE Qualific  | 0 | 210 | N | Distinction |
| 1777834 | F | Addis Abak A Level or I  | 0 | 60  | N | Pass        |
| 1808622 | M | South Regi A Level or I  | 0 | 45  | N | Pass        |
| 1810414 | M | South Regi HE Qualific   | 0 | 90  | N | Fail        |
| 1817515 | M | Sidamo Re HE Qualific    | 0 | 30  | N | Fail        |
| 1826819 | M | Afar Region HE Qualific  | 0 | 60  | N | Distinction |
| 1828753 | M | Somalia Re A Level or I  | 0 | 70  | N | Distinction |
| 1829051 | M | Afar Region HE Qualific  | 0 | 175 | N | Withdrawn   |
| 1841267 | F | Afar Region A Level or I | 1 | 30  | N | Withdrawn   |
| 1841850 | F | Addis Abak Lower Tha     | 0 | 90  | N | Withdrawn   |
| 1848820 | M | North Regi Lower Tha     | 1 | 30  | N | Fail        |
| 1850818 | M | South Wes A Level or I   | 0 | 30  | N | Withdrawn   |
| 1851108 | M | Addis Abak HE Qualific   | 0 | 30  | N | Distinction |
| 1864086 | M | Afar Region A Level or I | 0 | 60  | Y | Withdrawn   |
| 1874160 | M | Tigrai Regi Lower Tha    | 0 | 60  | N | Pass        |
| 1881041 | F | Somalia Re Lower Tha     | 0 | 150 | N | Withdrawn   |
| 1896088 | M | South Regi A Level or I  | 1 | 30  | N | Fail        |
| 1897054 | F | Sidamo Re A Level or I   | 0 | 30  | N | Pass        |
| 1902240 | M | South Regi A Level or I  | 0 | 60  | N | Pass        |
| 1906003 | F | South Regi A Level or I  | 0 | 150 | N | Pass        |
| 1915824 | F | South Wes HE Qualific    | 0 | 30  | N | Pass        |
| 1916140 | F | Sidamo Re A Level or I   | 0 | 60  | N | Withdrawn   |
| 1930949 | M | Sidamo Re Lower Tha      | 0 | 60  | N | Withdrawn   |
| 1936285 | M | Afar Region HE Qualific  | 0 | 120 | N | Distinction |
| 1937511 | F | North Regi HE Qualific   | 1 | 270 | N | Withdrawn   |
| 1942491 | M | Addis Abak HE Qualific   | 0 | 30  | N | Pass        |
| 1942870 | F | Afar Region Lower Tha    | 0 | 90  | N | Pass        |
| 1945240 | M | Somalia Re Lower Tha     | 1 | 90  | N | Withdrawn   |
| 1958121 | F | Afar Region A Level or I | 0 | 60  | Y | Distinction |
| 1960479 | M | Afar Region A Level or I | 0 | 30  | Y | Pass        |
| 1961938 | M | Sidamo Re HE Qualific    | 0 | 30  | N | Distinction |
| 1966597 | M | South Regi Lower Tha     | 0 | 30  | N | Withdrawn   |

|         |   |                         |   |     |   |             |
|---------|---|-------------------------|---|-----|---|-------------|
| 1976004 | F | South Regi A Level or I | 0 | 30  | N | Withdrawn   |
| 1982166 | M | South Regi A Level or I | 0 | 60  | N | Pass        |
| 1986081 | F | South Wes A Level or I  | 0 | 60  | N | Withdrawn   |
| 1991399 | F | Somalia Re Lower Than   | 0 | 120 | N | Distinction |
| 1994385 | M | Somalia Re A Level or I | 0 | 60  | N | Withdrawn   |
| 2009279 | M | South Regi HE Qualific  | 0 | 150 | N | Withdrawn   |
| 2013403 | F | Oromia Re A Level or I  | 0 | 60  | N | Pass        |
| 2020916 | M | North Regi Lower Than   | 0 | 30  | N | Pass        |
| 2026585 | M | South Wes HE Qualific   | 0 | 60  | N | Pass        |
| 2030117 | M | Afar Regio HE Qualific  | 1 | 40  | N | Fail        |
| 2030241 | M | Addis Abak Lower Than   | 0 | 150 | N | Withdrawn   |
| 2032057 | M | South Regi A Level or I | 0 | 30  | N | Withdrawn   |
| 2039190 | F | North Regi Lower Than   | 0 | 120 | N | Withdrawn   |
| 2041743 | F | Afar Regio HE Qualific  | 0 | 90  | N | Withdrawn   |
| 2044299 | M | Afar Regio HE Qualific  | 1 | 30  | N | Withdrawn   |
| 2050179 | M | Oromia Re A Level or I  | 0 | 60  | N | Distinction |
| 2063436 | F | Amhara Re A Level or I  | 0 | 60  | Y | Withdrawn   |
| 2067377 | M | Sidamo Re HE Qualific   | 0 | 60  | N | Pass        |
| 2070517 | M | Sidamo Re HE Qualific   | 0 | 30  | N | Distinction |
| 2078353 | M | Afar Regio A Level or I | 0 | 30  | N | Fail        |
| 2083701 | M | South Wes Lower Than    | 0 | 30  | N | Pass        |
| 2084711 | M | Afar Regio A Level or I | 0 | 60  | N | Pass        |
| 2091230 | M | Sidamo Re Post Gradu    | 0 | 60  | N | Distinction |
| 2093150 | M | Afar Regio HE Qualific  | 0 | 30  | N | Pass        |
| 2094849 | M | Somalia Re A Level or I | 0 | 30  | N | Withdrawn   |
| 2096918 | M | South Wes A Level or I  | 1 | 30  | N | Fail        |
| 2101566 | F | Afar Regio HE Qualific  | 0 | 90  | N | Withdrawn   |
| 2112670 | M | South Regi HE Qualific  | 0 | 60  | N | Withdrawn   |
| 2127889 | M | Afar Regio A Level or I | 0 | 60  | N | Pass        |
| 2133234 | M | Somalia Re A Level or I | 0 | 30  | N | Withdrawn   |
| 2137171 | M | Addis Abak HE Qualific  | 0 | 60  | N | Pass        |
| 2138146 | M | Tigrai Regio Lower Than | 0 | 90  | N | Withdrawn   |
| 2138904 | F | South Wes A Level or I  | 0 | 60  | Y | Withdrawn   |
| 2139273 | M | Afar Regio A Level or I | 1 | 30  | N | Withdrawn   |
| 2142055 | M | South Regi A Level or I | 0 | 30  | N | Pass        |
| 2142516 | F | Afar Regio Lower Than   | 0 | 30  | N | Pass        |
| 2147889 | F | Afar Regio A Level or I | 0 | 60  | N | Withdrawn   |
| 2149324 | M | Amhara Re Lower Than    | 0 | 30  | N | Withdrawn   |
| 2154220 | M | Oromia Re Lower Than    | 0 | 90  | N | Withdrawn   |
| 2159868 | F | Afar Regio A Level or I | 0 | 30  | N | Pass        |
| 2166000 | F | Afar Regio A Level or I | 0 | 60  | N | Withdrawn   |
| 2172136 | M | Somalia Re A Level or I | 0 | 60  | N | Distinction |
| 2178686 | F | Afar Regio HE Qualific  | 0 | 60  | N | Distinction |
| 2179304 | F | North Regi Lower Than   | 0 | 90  | N | Withdrawn   |
| 2182333 | M | South Wes A Level or I  | 0 | 90  | N | Withdrawn   |
| 2202076 | M | South Wes Lower Than    | 1 | 60  | N | Withdrawn   |
| 2216442 | M | Sidamo Re No Formal     | 0 | 90  | N | Withdrawn   |

|         |   |                         |   |     |   |             |
|---------|---|-------------------------|---|-----|---|-------------|
| 2230407 | M | Oromia Re A Level or I  | 0 | 30  | N | Withdrawn   |
| 2242383 | M | South Regi A Level or I | 0 | 90  | N | Withdrawn   |
| 2244214 | M | Sidamo Re HE Qualific   | 0 | 30  | N | Withdrawn   |
| 2252437 | M | Amhara Re Lower Tha     | 1 | 60  | N | Withdrawn   |
| 2257112 | M | South Regi Lower Tha    | 0 | 30  | N | Pass        |
| 2257740 | F | Sidamo Re A Level or I  | 0 | 90  | N | Pass        |
| 2268049 | F | Oromia Re Lower Tha     | 0 | 30  | N | Withdrawn   |
| 2274929 | M | South Regi HE Qualific  | 0 | 120 | N | Withdrawn   |
| 2277009 | M | Somalia Re A Level or I | 0 | 150 | N | Pass        |
| 2285527 | M | South Wes A Level or I  | 0 | 120 | N | Pass        |
| 2289145 | F | Tigrai Regi HE Qualific | 0 | 30  | N | Pass        |
| 2297770 | M | Somalia Re Lower Tha    | 0 | 30  | N | Withdrawn   |
| 2316201 | M | Amhara Re Lower Tha     | 0 | 60  | N | Pass        |
| 2326041 | M | Sidamo Re Lower Tha     | 0 | 60  | N | Withdrawn   |
| 2327472 | M | South Wes HE Qualific   | 0 | 30  | N | Pass        |
| 2333156 | F | Amhara Re Lower Tha     | 0 | 60  | N | Distinction |
| 2338535 | M | Afar Regi HE Qualific   | 0 | 60  | N | Withdrawn   |
| 2339333 | M | South Wes HE Qualific   | 0 | 30  | N | Pass        |
| 2340786 | M | Sidamo Re A Level or I  | 0 | 30  | N | Distinction |
| 2345751 | M | Amhara Re A Level or I  | 0 | 60  | N | Pass        |
| 2358258 | M | South Wes Post Gradu    | 0 | 90  | N | Pass        |
| 2358707 | F | South Wes A Level or I  | 1 | 210 | N | Withdrawn   |
| 2361633 | M | Amhara Re A Level or I  | 0 | 30  | N | Pass        |
| 2366117 | M | South Wes Lower Tha     | 0 | 30  | N | Distinction |
| 2367058 | M | South Regi Lower Tha    | 1 | 30  | N | Withdrawn   |
| 2372788 | M | Sidamo Re Lower Tha     | 0 | 90  | N | Withdrawn   |
| 2373648 | F | Afar Regi HE Qualific   | 0 | 90  | N | Withdrawn   |
| 2376512 | M | Sidamo Re Lower Tha     | 0 | 30  | N | Pass        |
| 2376717 | M | South Wes HE Qualific   | 0 | 210 | N | Withdrawn   |
| 2377769 | F | Amhara Re A Level or I  | 0 | 30  | N | Withdrawn   |
| 2383983 | M | Addis Abat Lower Tha    | 0 | 90  | N | Pass        |
| 2384666 | F | Amhara Re Lower Tha     | 0 | 30  | N | Withdrawn   |
| 2388623 | F | South Regi A Level or I | 0 | 60  | Y | Fail        |
| 2393945 | F | Tigrai Regi HE Qualific | 0 | 60  | N | Pass        |
| 2394090 | F | South Regi A Level or I | 1 | 130 | N | Pass        |
| 2396985 | M | Sidamo Re HE Qualific   | 0 | 60  | N | Fail        |
| 2405801 | M | Afar Regi A Level or I  | 0 | 30  | N | Withdrawn   |
| 2405934 | M | Amhara Re A Level or I  | 1 | 220 | N | Fail        |
| 2410609 | F | Sidamo Re A Level or I  | 0 | 60  | N | Pass        |
| 2413037 | M | Sidamo Re HE Qualific   | 0 | 90  | N | Withdrawn   |
| 2415526 | F | Amhara Re A Level or I  | 0 | 150 | N | Pass        |
| 2421961 | M | Sidamo Re A Level or I  | 1 | 30  | N | Fail        |
| 2422258 | M | South Wes A Level or I  | 0 | 90  | Y | Withdrawn   |
| 2424697 | F | Addis Abat A Level or I | 0 | 60  | N | Withdrawn   |
| 2434666 | M | Sidamo Re HE Qualific   | 0 | 60  | N | Distinction |
| 2437591 | M | Addis Abat Lower Tha    | 0 | 90  | N | Withdrawn   |
| 2439239 | M | South Wes Post Gradu    | 0 | 30  | N | Withdrawn   |

|         |   |                          |   |     |   |             |
|---------|---|--------------------------|---|-----|---|-------------|
| 2451523 | F | Oromia Re HE Qualific    | 0 | 60  | N | Distinction |
| 2454119 | F | Addis Abak A Level or I  | 0 | 120 | Y | Withdrawn   |
| 2458925 | M | Sidamo Re Lower Than     | 0 | 90  | N | Fail        |
| 2462607 | F | Addis Abak HE Qualific   | 0 | 90  | N | Pass        |
| 2462628 | M | Oromia Re HE Qualific    | 0 | 60  | N | Withdrawn   |
| 2462862 | F | South Regi A Level or I  | 0 | 180 | N | Withdrawn   |
| 2464118 | M | Oromia Re Lower Than     | 0 | 60  | N | Pass        |
| 2464386 | F | Somalia Re A Level or I  | 0 | 60  | Y | Pass        |
| 2469688 | M | Sidamo Re A Level or I   | 0 | 60  | N | Pass        |
| 2470326 | M | Somalia Re A Level or I  | 0 | 120 | Y | Fail        |
| 2472995 | M | South Regi HE Qualific   | 0 | 30  | N | Fail        |
| 2473058 | M | South Regi A Level or I  | 1 | 100 | N | Withdrawn   |
| 2480654 | F | Sidamo Re Lower Than     | 0 | 240 | N | Withdrawn   |
| 2483382 | F | Afar Regioi A Level or I | 0 | 60  | Y | Withdrawn   |
| 2485655 | M | Addis Abak HE Qualific   | 0 | 30  | N | Withdrawn   |
| 2499779 | F | South Regi HE Qualific   | 0 | 30  | N | Fail        |
| 2500064 | M | Oromia Re Lower Than     | 0 | 120 | N | Fail        |
| 2502882 | M | Sidamo Re A Level or I   | 0 | 30  | Y | Withdrawn   |
| 2504694 | F | Amhara Re Lower Than     | 0 | 90  | Y | Withdrawn   |
| 2517389 | M | Sidamo Re A Level or I   | 0 | 120 | N | Pass        |
| 2520539 | M | South Wes A Level or I   | 0 | 110 | N | Pass        |
| 2522932 | F | Afar Regioi HE Qualific  | 1 | 210 | N | Fail        |
| 2533650 | F | South Wes Lower Than     | 0 | 60  | N | Fail        |
| 2552412 | F | Oromia Re A Level or I   | 0 | 30  | N | Fail        |
| 2554973 | M | South Regi Lower Than    | 0 | 90  | N | Withdrawn   |
| 2555596 | M | South Regi A Level or I  | 1 | 30  | N | Withdrawn   |
| 2557563 | M | South Regi HE Qualific   | 0 | 95  | N | Pass        |
| 2558071 | M | South Regi Lower Than    | 0 | 30  | Y | Pass        |
| 2559144 | F | Sidamo Re A Level or I   | 0 | 120 | N | Distinction |
| 2561862 | M | South Wes HE Qualific    | 0 | 90  | N | Withdrawn   |
| 2564333 | M | Amhara Re A Level or I   | 1 | 60  | Y | Withdrawn   |
| 2574909 | M | Tigrai Regio HE Qualific | 0 | 30  | N | Withdrawn   |
| 2578004 | F | South Regi Lower Than    | 0 | 60  | N | Withdrawn   |
| 2585270 | M | Amhara Re A Level or I   | 0 | 60  | N | Withdrawn   |
| 2588294 | M | South Wes A Level or I   | 0 | 30  | N | Withdrawn   |
| 2590948 | F | South Regi A Level or I  | 1 | 60  | N | Fail        |
| 2593689 | F | Afar Regioi A Level or I | 0 | 90  | N | Pass        |
| 2593755 | M | South Wes Lower Than     | 0 | 30  | N | Pass        |
| 2593920 | F | Sidamo Re HE Qualific    | 0 | 30  | N | Pass        |
| 2595204 | M | South Wes Lower Than     | 0 | 90  | N | Fail        |
| 2595526 | M | South Wes A Level or I   | 0 | 150 | N | Withdrawn   |
| 2596553 | M | South Wes Lower Than     | 0 | 30  | Y | Withdrawn   |
| 2598631 | M | North Regi HE Qualific   | 0 | 60  | N | Fail        |
| 2598961 | M | Addis Abak HE Qualific   | 0 | 30  | N | Distinction |
| 2599883 | F | Afar Regioi A Level or I | 0 | 240 | N | Distinction |
| 2609069 | M | Sidamo Re A Level or I   | 0 | 30  | N | Withdrawn   |
| 2612725 | M | South Regi A Level or I  | 0 | 120 | N | Withdrawn   |

|         |   |                |              |   |     |   |             |
|---------|---|----------------|--------------|---|-----|---|-------------|
| 2613225 | M | Afar Region    | A Level or I | 0 | 30  | N | Withdrawn   |
| 2613746 | M | Afar Region    | A Level or I | 0 | 60  | N | Withdrawn   |
| 2614093 | M | South Region   | A Level or I | 0 | 180 | N | Pass        |
| 2619025 | M | South Region   | A Level or I | 0 | 60  | Y | Pass        |
| 2619472 | M | South Region   | Lower Than   | 0 | 120 | Y | Withdrawn   |
| 2620661 | M | Amhara Region  | A Level or I | 0 | 30  | N | Pass        |
| 2622441 | M | Sidamo Region  | Lower Than   | 0 | 120 | N | Pass        |
| 2622627 | M | Afar Region    | HE Qualific  | 0 | 180 | Y | Withdrawn   |
| 2623427 | M | Afar Region    | Lower Than   | 0 | 60  | N | Fail        |
| 2627491 | M | South West     | Lower Than   | 0 | 60  | N | Withdrawn   |
| 2630469 | M | Oromia Region  | HE Qualific  | 0 | 75  | N | Withdrawn   |
| 2633981 | M | South West     | A Level or I | 1 | 60  | Y | Withdrawn   |
| 2637000 | M | Tigray Region  | A Level or I | 0 | 120 | N | Withdrawn   |
| 2637912 | M | Afar Region    | HE Qualific  | 0 | 30  | N | Fail        |
| 2647893 | M | South West     | HE Qualific  | 0 | 30  | N | Distinction |
| 2650741 | M | South Region   | Lower Than   | 0 | 30  | N | Fail        |
| 2655763 | M | Addis Ababa    | A Level or I | 0 | 45  | N | Fail        |
| 2658314 | F | South Region   | Lower Than   | 0 | 30  | N | Pass        |
| 2668106 | M | Sidamo Region  | A Level or I | 0 | 30  | N | Distinction |
| 2672114 | M | North Region   | Lower Than   | 0 | 90  | N | Withdrawn   |
| 2677097 | F | Afar Region    | A Level or I | 0 | 120 | N | Withdrawn   |
| 2681198 | M | Addis Ababa    | Lower Than   | 1 | 90  | N | Withdrawn   |
| 2686712 | M | South Region   | A Level or I | 0 | 60  | N | Fail        |
| 2689013 | M | Afar Region    | Post Gradu   | 0 | 30  | N | Withdrawn   |
| 2691267 | F | South Region   | Lower Than   | 1 | 60  | N | Pass        |
| 2691861 | M | Sidamo Region  | Lower Than   | 1 | 120 | N | Fail        |
| 24213   | F | Addis Ababa    | A Level or I | 0 | 90  | N | Withdrawn   |
| 40419   | M | Somalia Region | Lower Than   | 0 | 60  | N | Withdrawn   |
| 41060   | M | South West     | HE Qualific  | 0 | 60  | N | Fail        |
| 43284   | M | Somalia Region | Lower Than   | 2 | 180 | N | Withdrawn   |
| 45664   | M | Sidamo Region  | HE Qualific  | 1 | 60  | N | Pass        |
| 52014   | F | Tigray Region  | Lower Than   | 2 | 120 | N | Fail        |
| 53488   | F | Addis Ababa    | HE Qualific  | 0 | 60  | N | Pass        |
| 53895   | M | North Region   | A Level or I | 1 | 60  | N | Withdrawn   |
| 55242   | F | Amhara Region  | Lower Than   | 0 | 60  | N | Fail        |
| 57359   | M | Somalia Region | HE Qualific  | 0 | 60  | N | Withdrawn   |
| 60135   | F | South Region   | A Level or I | 0 | 60  | N | Pass        |
| 66579   | M | South Region   | Lower Than   | 0 | 60  | N | Fail        |
| 67602   | M | South West     | Lower Than   | 1 | 60  | N | Pass        |
| 67785   | F | Sidamo Region  | Lower Than   | 0 | 120 | Y | Pass        |
| 69491   | F | Addis Ababa    | Lower Than   | 4 | 60  | N | Pass        |
| 72451   | M | Somalia Region | Lower Than   | 0 | 60  | N | Withdrawn   |
| 76536   | F | South Region   | Lower Than   | 1 | 120 | N | Fail        |
| 77763   | M | Addis Ababa    | HE Qualific  | 0 | 150 | N | Pass        |
| 81351   | M | Afar Region    | HE Qualific  | 1 | 60  | Y | Fail        |
| 86047   | F | Tigray Region  | HE Qualific  | 0 | 60  | N | Pass        |
| 87107   | F | South West     | HE Qualific  | 0 | 60  | N | Pass        |

|        |   |                          |   |     |   |             |
|--------|---|--------------------------|---|-----|---|-------------|
| 89051  | M | Amhara Re A Level or I   | 0 | 120 | Y | Pass        |
| 90836  | M | South Regi A Level or I  | 0 | 180 | Y | Fail        |
| 92775  | F | North Regi Lower Than    | 1 | 60  | Y | Fail        |
| 94923  | F | Afar Region Lower Than   | 2 | 90  | N | Fail        |
| 94964  | F | South Wes Lower Than     | 0 | 60  | N | Fail        |
| 95356  | F | Afar Region HE Qualific  | 0 | 90  | N | Withdrawn   |
| 96592  | F | Sidamo Re HE Qualific    | 0 | 60  | N | Pass        |
| 96945  | M | South Regi A Level or I  | 0 | 90  | N | Withdrawn   |
| 103904 | M | South Regi HE Qualific   | 0 | 60  | N | Distinction |
| 108565 | M | South Wes A Level or I   | 0 | 60  | N | Withdrawn   |
| 110200 | F | Sidamo Re Lower Than     | 0 | 90  | N | Fail        |
| 111113 | M | North Regi Lower Than    | 0 | 60  | N | Fail        |
| 111360 | M | South Regi HE Qualific   | 2 | 120 | N | Withdrawn   |
| 112245 | M | South Regi HE Qualific   | 0 | 60  | N | Pass        |
| 117435 | M | South Wes Lower Than     | 0 | 90  | Y | Withdrawn   |
| 117862 | M | South Regi A Level or I  | 1 | 60  | N | Withdrawn   |
| 117939 | F | Oromia Re Lower Than     | 0 | 60  | N | Withdrawn   |
| 121000 | F | Tigrai Regi Lower Than   | 0 | 270 | Y | Fail        |
| 121390 | M | Amhara Re Lower Than     | 0 | 60  | N | Fail        |
| 124728 | F | Amhara Re A Level or I   | 0 | 150 | Y | Withdrawn   |
| 125677 | M | Addis Abak A Level or I  | 3 | 150 | N | Withdrawn   |
| 126912 | M | Somalia Re A Level or I  | 1 | 60  | N | Fail        |
| 128678 | F | Sidamo Re A Level or I   | 1 | 90  | N | Fail        |
| 128965 | M | South Wes A Level or I   | 0 | 120 | N | Withdrawn   |
| 130003 | F | Addis Abak Lower Than    | 2 | 60  | N | Fail        |
| 131145 | M | South Wes A Level or I   | 0 | 60  | N | Pass        |
| 131235 | M | Sidamo Re Lower Than     | 0 | 60  | N | Withdrawn   |
| 131609 | M | Amhara Re Lower Than     | 0 | 90  | N | Withdrawn   |
| 134025 | M | Sidamo Re A Level or I   | 0 | 60  | N | Distinction |
| 134188 | M | South Wes A Level or I   | 0 | 60  | N | Pass        |
| 134336 | M | Afar Region A Level or I | 0 | 60  | N | Fail        |
| 137603 | M | Tigrai Regi Post Gradu   | 0 | 60  | N | Pass        |
| 138709 | M | North Regi Lower Than    | 0 | 60  | Y | Withdrawn   |
| 141766 | F | Sidamo Re A Level or I   | 1 | 120 | N | Withdrawn   |
| 142819 | M | South Regi A Level or I  | 0 | 90  | N | Pass        |
| 142998 | F | Amhara Re HE Qualific    | 0 | 120 | Y | Withdrawn   |
| 144923 | M | Afar Region Lower Than   | 1 | 120 | N | Fail        |
| 146089 | M | Amhara Re HE Qualific    | 0 | 60  | N | Fail        |
| 146651 | M | South Regi A Level or I  | 2 | 60  | N | Fail        |
| 147307 | M | Sidamo Re Lower Than     | 1 | 60  | N | Withdrawn   |
| 150578 | F | North Regi Lower Than    | 0 | 60  | N | Fail        |
| 157298 | M | Oromia Re Lower Than     | 0 | 60  | N | Pass        |
| 159596 | M | South Wes HE Qualific    | 0 | 60  | N | Withdrawn   |
| 159925 | F | Sidamo Re A Level or I   | 2 | 70  | N | Pass        |
| 160005 | F | Afar Region HE Qualific  | 0 | 60  | N | Pass        |
| 160401 | M | Sidamo Re A Level or I   | 1 | 60  | N | Withdrawn   |
| 162984 | M | Sidamo Re No Formal      | 2 | 220 | N | Withdrawn   |



|        |   |                           |   |     |   |           |
|--------|---|---------------------------|---|-----|---|-----------|
| 163067 | F | Oromia Re Lower Tha       | 0 | 60  | N | Pass      |
| 165421 | M | South Wes HE Qualific     | 0 | 60  | N | Fail      |
| 165733 | M | Afar Regio A Level or I   | 0 | 60  | Y | Fail      |
| 166342 | M | North Regi A Level or I   | 0 | 60  | N | Pass      |
| 166713 | M | North Regi Lower Tha      | 0 | 60  | N | Pass      |
| 166988 | F | Sidamo Re HE Qualific     | 0 | 90  | N | Pass      |
| 167123 | M | Oromia Re Lower Tha       | 1 | 160 | N | Withdrawn |
| 167717 | M | Sidamo Re A Level or I    | 0 | 60  | N | Fail      |
| 168243 | M | Tigrai Regio Lower Tha    | 2 | 180 | Y | Withdrawn |
| 169894 | M | South Wes HE Qualific     | 0 | 60  | N | Withdrawn |
| 170025 | F | Addis Abak HE Qualific    | 0 | 60  | N | Pass      |
| 171896 | F | Oromia Re A Level or I    | 0 | 60  | N | Pass      |
| 173004 | F | South Wes HE Qualific     | 0 | 90  | N | Withdrawn |
| 176092 | F | South Wes A Level or I    | 0 | 70  | N | Pass      |
| 177333 | F | Afar Regio Lower Tha      | 0 | 120 | N | Pass      |
| 177817 | M | Somalia Re HE Qualific    | 0 | 120 | N | Withdrawn |
| 177981 | F | Afar Regio HE Qualific    | 1 | 60  | N | Pass      |
| 178639 | M | Amhara Re Lower Tha       | 0 | 60  | N | Fail      |
| 179892 | F | Sidamo Re HE Qualific     | 0 | 60  | N | Pass      |
| 180667 | M | Amhara Re A Level or I    | 0 | 60  | N | Pass      |
| 180958 | M | Afar Regio A Level or I   | 1 | 150 | Y | Pass      |
| 183714 | M | South Wes Lower Tha       | 0 | 60  | Y | Pass      |
| 184968 | F | Oromia Re Lower Tha       | 1 | 120 | N | Withdrawn |
| 187623 | M | Somalia Re A Level or I   | 0 | 60  | N | Fail      |
| 191195 | F | Afar Regio Lower Tha      | 0 | 120 | Y | Fail      |
| 191398 | M | Amhara Re Lower Tha       | 1 | 210 | N | Withdrawn |
| 191491 | F | South Regi Lower Tha      | 0 | 60  | N | Withdrawn |
| 191896 | F | Sidamo Re Lower Tha       | 0 | 60  | N | Fail      |
| 191972 | M | South Wes A Level or I    | 4 | 120 | N | Pass      |
| 192196 | M | Sidamo Re Lower Tha       | 0 | 60  | N | Pass      |
| 196266 | F | Afar Regio Lower Tha      | 0 | 240 | N | Fail      |
| 196902 | F | Tigrai Regio A Level or I | 3 | 60  | N | Withdrawn |
| 198470 | F | South Wes A Level or I    | 0 | 60  | N | Withdrawn |
| 199782 | M | Tigrai Regio Lower Tha    | 0 | 60  | N | Fail      |
| 200588 | M | Sidamo Re A Level or I    | 1 | 150 | N | Fail      |
| 200957 | M | South Wes A Level or I    | 1 | 120 | N | Fail      |
| 202506 | M | Afar Regio HE Qualific    | 1 | 150 | N | Fail      |
| 204996 | M | Sidamo Re HE Qualific     | 0 | 120 | N | Pass      |
| 227491 | F | South Regi A Level or I   | 0 | 60  | N | Withdrawn |
| 228242 | F | Addis Abak HE Qualific    | 1 | 145 | N | Fail      |
| 228543 | F | Addis Abak Lower Tha      | 4 | 60  | N | Fail      |
| 229057 | F | Sidamo Re Lower Tha       | 3 | 120 | N | Fail      |
| 230052 | M | Amhara Re A Level or I    | 0 | 180 | N | Withdrawn |
| 233389 | F | South Regi Lower Tha      | 1 | 120 | N | Fail      |
| 233771 | M | South Wes A Level or I    | 0 | 60  | N | Pass      |
| 234740 | M | South Regi Lower Tha      | 0 | 60  | N | Pass      |
| 234859 | F | Sidamo Re A Level or I    | 0 | 60  | N | Pass      |

|        |   |                          |   |     |   |             |
|--------|---|--------------------------|---|-----|---|-------------|
| 234978 | M | South Regi A Level or I  | 2 | 130 | N | Fail        |
| 235428 | M | Sidamo Re Lower Tha      | 0 | 60  | N | Withdrawn   |
| 235492 | M | North Regi A Level or I  | 0 | 60  | N | Fail        |
| 235584 | F | South Regi HE Qualific   | 0 | 90  | N | Fail        |
| 236498 | F | Sidamo Re HE Qualific    | 0 | 60  | N | Fail        |
| 236620 | M | South Regi A Level or I  | 0 | 60  | N | Pass        |
| 240389 | F | South Regi HE Qualific   | 0 | 120 | N | Withdrawn   |
| 240755 | M | Sidamo Re A Level or I   | 0 | 90  | N | Withdrawn   |
| 240936 | M | Oromia Re A Level or I   | 1 | 90  | N | Fail        |
| 241771 | F | Oromia Re HE Qualific    | 0 | 60  | N | Fail        |
| 241922 | F | Amhara Re HE Qualific    | 0 | 60  | N | Pass        |
| 241971 | M | South Wes A Level or I   | 0 | 60  | N | Withdrawn   |
| 244875 | M | Addis Abak A Level or I  | 0 | 60  | N | Pass        |
| 244919 | M | Sidamo Re Lower Tha      | 2 | 60  | N | Withdrawn   |
| 246652 | M | Tigrai Regi HE Qualific  | 0 | 120 | N | Pass        |
| 248511 | F | South Wes A Level or I   | 4 | 120 | N | Pass        |
| 248994 | F | Tigrai Regi Lower Tha    | 0 | 60  | N | Pass        |
| 249423 | F | South Regi A Level or I  | 0 | 60  | N | Pass        |
| 249996 | F | Oromia Re Lower Tha      | 2 | 150 | N | Fail        |
| 251999 | F | North Regi A Level or I  | 1 | 280 | N | Pass        |
| 252149 | F | South Regi A Level or I  | 1 | 60  | N | Distinction |
| 252489 | F | South Regi A Level or I  | 0 | 60  | Y | Pass        |
| 255747 | F | South Regi Lower Tha     | 2 | 60  | N | Fail        |
| 255902 | F | South Regi Post Gradu    | 0 | 60  | N | Fail        |
| 257110 | F | South Wes A Level or I   | 0 | 115 | N | Withdrawn   |
| 257369 | M | Amhara Re A Level or I   | 0 | 180 | N | Withdrawn   |
| 258310 | M | South Regi A Level or I  | 1 | 120 | N | Withdrawn   |
| 259750 | M | Oromia Re Lower Tha      | 0 | 60  | N | Fail        |
| 260491 | F | Addis Abak A Level or I  | 0 | 60  | N | Pass        |
| 260639 | M | Oromia Re A Level or I   | 1 | 120 | Y | Fail        |
| 262396 | F | Addis Abak Lower Tha     | 0 | 60  | Y | Fail        |
| 263524 | F | Afar Regio Lower Tha     | 0 | 60  | N | Withdrawn   |
| 266450 | M | Amhara Re A Level or I   | 0 | 60  | N | Pass        |
| 266514 | M | North Regi A Level or I  | 1 | 60  | N | Pass        |
| 266757 | F | South Regi A Level or I  | 2 | 60  | N | Withdrawn   |
| 266762 | F | Tigrai Regi A Level or I | 2 | 120 | N | Fail        |
| 269676 | M | Amhara Re Lower Tha      | 0 | 70  | N | Pass        |
| 270435 | M | Sidamo Re Lower Tha      | 0 | 90  | N | Fail        |
| 270468 | F | South Regi Lower Tha     | 0 | 60  | N | Fail        |
| 270814 | F | Addis Abak HE Qualific   | 0 | 90  | N | Pass        |
| 272313 | F | Addis Abak A Level or I  | 2 | 120 | N | Withdrawn   |
| 273339 | F | South Regi Lower Tha     | 0 | 90  | N | Fail        |
| 281118 | F | Somalia Re Lower Tha     | 1 | 70  | N | Pass        |
| 281271 | M | Afar Regio A Level or I  | 0 | 60  | Y | Withdrawn   |
| 282193 | M | Amhara Re No Formal      | 1 | 120 | N | Pass        |
| 283618 | M | South Regi Lower Tha     | 2 | 120 | N | Pass        |
| 283783 | F | Somalia Re A Level or I  | 1 | 60  | N | Withdrawn   |

|        |   |                             |   |     |   |           |
|--------|---|-----------------------------|---|-----|---|-----------|
| 284326 | F | Tigray Region Lower Than    | 0 | 150 | N | Fail      |
| 284734 | M | Sidamo Region HE Qualific   | 1 | 90  | N | Fail      |
| 285096 | M | South West Lower Than       | 0 | 60  | N | Pass      |
| 285475 | M | Sidamo Region HE Qualific   | 1 | 120 | N | Pass      |
| 287432 | F | Tigray Region A Level or l  | 0 | 90  | N | Pass      |
| 287526 | M | Addis Ababa A Level or l    | 1 | 60  | N | Withdrawn |
| 289564 | M | Addis Ababa Lower Than      | 0 | 60  | Y | Fail      |
| 290043 | M | Afar Region A Level or l    | 2 | 60  | N | Pass      |
| 291133 | M | Afar Region A Level or l    | 0 | 60  | N | Pass      |
| 292694 | F | Sidamo Region A Level or l  | 0 | 120 | N | Withdrawn |
| 292713 | M | South Region Lower Than     | 0 | 60  | Y | Fail      |
| 292741 | M | South Region A Level or l   | 0 | 90  | N | Fail      |
| 297582 | M | South Region Lower Than     | 0 | 60  | Y | Withdrawn |
| 298040 | F | South Region HE Qualific    | 0 | 60  | N | Pass      |
| 298497 | M | South Region Lower Than     | 0 | 70  | N | Pass      |
| 304734 | M | Addis Ababa HE Qualific     | 1 | 60  | N | Pass      |
| 304893 | M | Amhara Region A Level or l  | 0 | 120 | N | Withdrawn |
| 305313 | F | Addis Ababa Lower Than      | 0 | 180 | Y | Withdrawn |
| 305702 | F | Sidamo Region A Level or l  | 0 | 120 | N | Withdrawn |
| 307158 | F | Afar Region Lower Than      | 0 | 90  | Y | Fail      |
| 307290 | F | Oromia Region HE Qualific   | 2 | 120 | N | Fail      |
| 307291 | F | South West A Level or l     | 0 | 60  | N | Withdrawn |
| 307932 | M | Afar Region HE Qualific     | 0 | 120 | N | Withdrawn |
| 308589 | M | South West A Level or l     | 3 | 120 | N | Fail      |
| 308767 | F | South West Lower Than       | 1 | 120 | N | Fail      |
| 309580 | F | Somalia Region HE Qualific  | 0 | 60  | N | Pass      |
| 310865 | M | Afar Region A Level or l    | 1 | 120 | Y | Withdrawn |
| 311117 | M | Afar Region A Level or l    | 0 | 60  | Y | Withdrawn |
| 312518 | F | South West Lower Than       | 1 | 210 | N | Withdrawn |
| 316289 | F | Addis Ababa HE Qualific     | 0 | 60  | N | Pass      |
| 316772 | M | Somalia Region A Level or l | 0 | 240 | N | Withdrawn |
| 320014 | F | Sidamo Region HE Qualific   | 0 | 60  | N | Pass      |
| 321525 | M | Addis Ababa A Level or l    | 2 | 60  | N | Pass      |
| 321744 | M | Oromia Region Lower Than    | 0 | 60  | N | Fail      |
| 323146 | F | Sidamo Region A Level or l  | 3 | 240 | N | Fail      |
| 324268 | M | South Region Lower Than     | 0 | 60  | N | Withdrawn |
| 324691 | F | Oromia Region A Level or l  | 0 | 60  | N | Pass      |
| 325565 | M | Amhara Region Lower Than    | 2 | 120 | N | Fail      |
| 327024 | F | South Region A Level or l   | 2 | 120 | N | Fail      |
| 327997 | M | North Region Lower Than     | 1 | 210 | N | Withdrawn |
| 329689 | F | Afar Region Lower Than      | 0 | 120 | N | Fail      |
| 329967 | M | South Region Lower Than     | 0 | 120 | N | Fail      |
| 330067 | M | Oromia Region A Level or l  | 2 | 60  | N | Pass      |
| 331232 | M | South Region Lower Than     | 0 | 90  | N | Pass      |
| 331351 | M | Tigray Region A Level or l  | 0 | 90  | N | Fail      |
| 333856 | F | Afar Region A Level or l    | 1 | 120 | Y | Pass      |
| 334294 | F | Addis Ababa A Level or l    | 1 | 225 | N | Withdrawn |

|        |   |             |             |   |     |   |             |
|--------|---|-------------|-------------|---|-----|---|-------------|
| 335020 | F | Tigrai Regi | A Level or  | 0 | 60  | N | Pass        |
| 335264 | F | Afar Regio  | A Level or  | 0 | 60  | Y | Withdrawn   |
| 335607 | F | Amhara Re   | A Level or  | 0 | 180 | N | Withdrawn   |
| 336112 | M | South Regi  | A Level or  | 1 | 120 | N | Fail        |
| 336684 | M | South Wes   | A Level or  | 0 | 60  | N | Pass        |
| 336696 | F | South Regi  | A Level or  | 0 | 60  | N | Pass        |
| 337048 | M | Sidamo Re   | A Level or  | 2 | 130 | N | Withdrawn   |
| 337414 | F | Addis Abak  | A Level or  | 1 | 60  | N | Withdrawn   |
| 338076 | M | Afar Regio  | HE Qualific | 0 | 90  | N | Pass        |
| 338669 | M | Amhara Re   | Lower Than  | 0 | 60  | N | Withdrawn   |
| 339481 | M | Sidamo Re   | A Level or  | 0 | 60  | N | Fail        |
| 340399 | F | Somalia Re  | Lower Than  | 2 | 120 | N | Fail        |
| 342176 | M | South Regi  | Lower Than  | 1 | 120 | N | Withdrawn   |
| 343427 | F | Tigrai Regi | Lower Than  | 0 | 60  | N | Withdrawn   |
| 344199 | M | South Regi  | Lower Than  | 0 | 70  | N | Withdrawn   |
| 344367 | M | North Regi  | Lower Than  | 1 | 120 | N | Fail        |
| 344474 | M | South Wes   | A Level or  | 0 | 75  | N | Withdrawn   |
| 344873 | F | South Wes   | A Level or  | 0 | 60  | N | Pass        |
| 345257 | M | South Regi  | A Level or  | 1 | 60  | N | Fail        |
| 345313 | M | South Regi  | A Level or  | 0 | 90  | N | Fail        |
| 345568 | F | Oromia Re   | A Level or  | 0 | 60  | N | Fail        |
| 347210 | M | North Regi  | HE Qualific | 0 | 90  | N | Withdrawn   |
| 348790 | M | Somalia Re  | HE Qualific | 0 | 60  | N | Withdrawn   |
| 349145 | F | Afar Regio  | Lower Than  | 1 | 120 | N | Withdrawn   |
| 350398 | F | Addis Abak  | HE Qualific | 1 | 60  | N | Withdrawn   |
| 350690 | F | Oromia Re   | Lower Than  | 1 | 150 | N | Withdrawn   |
| 351512 | M | South Wes   | HE Qualific | 0 | 60  | N | Fail        |
| 351775 | F | Afar Regio  | HE Qualific | 0 | 70  | N | Pass        |
| 354050 | M | South Wes   | A Level or  | 1 | 150 | N | Fail        |
| 356257 | F | Sidamo Re   | A Level or  | 0 | 210 | N | Withdrawn   |
| 357576 | M | Sidamo Re   | Lower Than  | 0 | 80  | N | Fail        |
| 357595 | M | South Regi  | A Level or  | 0 | 180 | N | Withdrawn   |
| 358075 | F | South Wes   | A Level or  | 0 | 60  | N | Pass        |
| 358522 | M | Sidamo Re   | A Level or  | 0 | 60  | N | Pass        |
| 360492 | M | South Wes   | Lower Than  | 0 | 60  | N | Distinction |
| 360938 | F | South Regi  | Lower Than  | 0 | 60  | N | Fail        |
| 361209 | M | Sidamo Re   | A Level or  | 1 | 180 | N | Pass        |
| 361282 | M | Tigrai Regi | Lower Than  | 0 | 60  | N | Withdrawn   |
| 362037 | F | South Wes   | HE Qualific | 0 | 60  | N | Pass        |
| 362374 | F | Addis Abak  | HE Qualific | 1 | 150 | N | Pass        |
| 364021 | F | Oromia Re   | Lower Than  | 1 | 210 | N | Fail        |
| 364405 | M | Sidamo Re   | HE Qualific | 0 | 60  | N | Distinction |
| 364440 | F | Somalia Re  | Lower Than  | 1 | 240 | Y | Withdrawn   |
| 365782 | M | Sidamo Re   | A Level or  | 0 | 90  | N | Distinction |
| 366024 | M | Oromia Re   | Lower Than  | 0 | 90  | N | Fail        |
| 366310 | M | North Regi  | Lower Than  | 0 | 60  | N | Pass        |
| 368741 | F | South Wes   | Lower Than  | 0 | 60  | N | Fail        |

|        |   |                            |   |     |   |             |
|--------|---|----------------------------|---|-----|---|-------------|
| 368749 | F | Tigrai Region HE Qualific  | 1 | 60  | N | Fail        |
| 369908 | M | Afar Region HE Qualific    | 0 | 60  | N | Pass        |
| 370949 | M | Sidamo Region Lower Than   | 0 | 60  | N | Pass        |
| 371044 | F | Sidamo Region HE Qualific  | 0 | 60  | N | Pass        |
| 371184 | F | Tigrai Region Lower Than   | 0 | 60  | N | Withdrawn   |
| 371831 | F | Sidamo Region HE Qualific  | 1 | 120 | N | Pass        |
| 373126 | M | North Region Lower Than    | 0 | 60  | N | Fail        |
| 373369 | M | Tigrai Region A Level or I | 0 | 60  | N | Distinction |
| 375300 | F | North Region HE Qualific   | 0 | 60  | N | Distinction |
| 378953 | M | Amhara Region Lower Than   | 0 | 120 | N | Fail        |
| 379199 | M | Oromia Region Lower Than   | 0 | 90  | N | Fail        |
| 379861 | F | Sidamo Region HE Qualific  | 0 | 60  | N | Distinction |
| 380341 | F | Afar Region HE Qualific    | 0 | 120 | N | Pass        |
| 380919 | M | Sidamo Region A Level or I | 0 | 60  | N | Pass        |
| 381646 | M | Amhara Region Lower Than   | 2 | 120 | N | Pass        |
| 382339 | M | South Region Lower Than    | 1 | 120 | Y | Fail        |
| 382408 | M | Addis Ababa Lower Than     | 0 | 60  | N | Withdrawn   |
| 382497 | M | Oromia Region HE Qualific  | 0 | 155 | N | Pass        |
| 382641 | F | Sidamo Region A Level or I | 0 | 60  | N | Pass        |
| 382947 | F | South West HE Qualific     | 0 | 60  | N | Fail        |
| 383347 | M | North Region Post Gradu    | 0 | 60  | N | Pass        |
| 383643 | F | Sidamo Region A Level or I | 0 | 60  | N | Fail        |
| 383701 | F | Sidamo Region Lower Than   | 1 | 120 | N | Fail        |
| 384026 | F | Sidamo Region A Level or I | 1 | 120 | N | Fail        |
| 384246 | F | Sidamo Region A Level or I | 0 | 60  | Y | Pass        |
| 386833 | M | Sidamo Region HE Qualific  | 0 | 60  | N | Fail        |
| 386880 | M | Amhara Region HE Qualific  | 0 | 60  | N | Pass        |
| 387289 | M | Addis Ababa Lower Than     | 0 | 60  | N | Withdrawn   |
| 387335 | F | Addis Ababa A Level or I   | 0 | 60  | Y | Withdrawn   |
| 387652 | M | North Region A Level or I  | 0 | 60  | N | Withdrawn   |
| 389076 | M | South West No Formal       | 2 | 60  | N | Withdrawn   |
| 389362 | F | South West Lower Than      | 0 | 60  | N | Withdrawn   |
| 390210 | F | North Region Lower Than    | 0 | 60  | N | Fail        |
| 390233 | M | South Region Lower Than    | 0 | 60  | Y | Pass        |
| 390942 | M | South Region A Level or I  | 1 | 60  | N | Fail        |
| 391185 | M | Sidamo Region HE Qualific  | 0 | 120 | N | Pass        |
| 391638 | F | South West A Level or I    | 0 | 60  | N | Withdrawn   |
| 392021 | F | North Region A Level or I  | 0 | 60  | N | Withdrawn   |
| 393150 | M | North Region A Level or I  | 1 | 60  | N | Fail        |
| 394028 | M | Tigrai Region A Level or I | 1 | 120 | N | Fail        |
| 394082 | M | Somalia Region Lower Than  | 1 | 120 | N | Withdrawn   |
| 394979 | M | Amhara Region HE Qualific  | 0 | 60  | N | Pass        |
| 395288 | F | Addis Ababa Lower Than     | 0 | 60  | N | Withdrawn   |
| 395757 | M | South West HE Qualific     | 0 | 130 | N | Pass        |
| 396633 | F | Oromia Region A Level or I | 0 | 60  | N | Fail        |
| 397405 | M | South Region HE Qualific   | 0 | 60  | N | Pass        |
| 398199 | M | Amhara Region HE Qualific  | 0 | 60  | N | Fail        |

|        |   |                         |   |     |   |             |
|--------|---|-------------------------|---|-----|---|-------------|
| 399450 | F | Oromia Re A Level or l  | 0 | 60  | N | Fail        |
| 400451 | M | Sidamo Re A Level or l  | 0 | 60  | N | Fail        |
| 400611 | F | South Wes A Level or l  | 0 | 90  | N | Withdrawn   |
| 400630 | M | Sidamo Re Lower Tha     | 1 | 120 | N | Fail        |
| 400759 | F | Somalia Re A Level or l | 0 | 60  | Y | Pass        |
| 401486 | M | Sidamo Re A Level or l  | 0 | 70  | N | Distinction |
| 402489 | F | Tigrai Regi Lower Tha   | 0 | 180 | N | Withdrawn   |
| 403085 | M | Somalia Re Lower Tha    | 0 | 60  | N | Pass        |
| 403902 | F | South Wes Lower Tha     | 0 | 60  | N | Fail        |
| 404852 | M | North Regi Lower Tha    | 1 | 130 | N | Withdrawn   |
| 405426 | M | Afar Regio A Level or l | 0 | 60  | N | Fail        |
| 405743 | M | South Regi HE Qualific  | 1 | 120 | N | Withdrawn   |
| 405784 | F | Tigrai Regi HE Qualific | 0 | 120 | N | Withdrawn   |
| 406056 | F | South Regi A Level or l | 0 | 60  | N | Pass        |
| 406498 | F | South Regi A Level or l | 1 | 120 | N | Withdrawn   |
| 406541 | F | Addis Abak A Level or l | 2 | 250 | N | Pass        |
| 407595 | F | Oromia Re A Level or l  | 2 | 60  | N | Fail        |
| 407838 | M | South Wes A Level or l  | 0 | 60  | N | Fail        |
| 409091 | F | Somalia Re A Level or l | 0 | 60  | N | Pass        |
| 409109 | F | Sidamo Re Lower Tha     | 2 | 150 | N | Pass        |
| 409766 | M | Sidamo Re Lower Tha     | 3 | 210 | N | Withdrawn   |
| 409880 | F | South Regi A Level or l | 0 | 90  | N | Withdrawn   |
| 410886 | F | Afar Regio A Level or l | 0 | 60  | N | Pass        |
| 411001 | M | Afar Regio Lower Tha    | 0 | 60  | N | Withdrawn   |
| 412063 | M | Tigrai Regi Lower Tha   | 0 | 60  | N | Fail        |
| 412431 | F | North Regi A Level or l | 0 | 180 | N | Withdrawn   |
| 412731 | F | Sidamo Re HE Qualific   | 0 | 60  | N | Fail        |
| 412754 | F | Addis Abak Lower Tha    | 2 | 60  | N | Withdrawn   |
| 412772 | M | Somalia Re HE Qualific  | 1 | 150 | N | Pass        |
| 413580 | F | Somalia Re HE Qualific  | 0 | 60  | N | Withdrawn   |
| 413934 | F | South Regi A Level or l | 0 | 60  | N | Fail        |
| 414304 | F | South Wes A Level or l  | 0 | 80  | N | Pass        |
| 414587 | F | South Wes HE Qualific   | 1 | 60  | N | Pass        |
| 414758 | M | South Regi Lower Tha    | 3 | 120 | N | Pass        |
| 414803 | F | South Wes A Level or l  | 1 | 120 | N | Fail        |
| 415695 | F | South Regi A Level or l | 0 | 60  | N | Fail        |
| 415812 | M | Afar Regio Lower Tha    | 0 | 60  | N | Withdrawn   |
| 416000 | F | Sidamo Re Lower Tha     | 1 | 210 | N | Withdrawn   |
| 416008 | M | Afar Regio Lower Tha    | 0 | 60  | N | Fail        |
| 417242 | F | Sidamo Re Lower Tha     | 0 | 60  | N | Pass        |
| 417410 | F | Amhara Re A Level or l  | 1 | 120 | N | Fail        |
| 417974 | M | Amhara Re A Level or l  | 2 | 120 | N | Withdrawn   |
| 418122 | M | South Regi A Level or l | 0 | 60  | N | Pass        |
| 418490 | M | South Regi A Level or l | 0 | 60  | N | Pass        |
| 418956 | M | South Regi Lower Tha    | 0 | 120 | N | Pass        |
| 419273 | F | Afar Regio Lower Tha    | 0 | 60  | N | Fail        |
| 420388 | F | South Wes Lower Tha     | 0 | 60  | Y | Pass        |

|        |   |                           |   |     |   |           |
|--------|---|---------------------------|---|-----|---|-----------|
| 421221 | F | South Wes A Level or      | 0 | 130 | N | Withdrawn |
| 422164 | M | Afar Region A Level or    | 0 | 90  | N | Fail      |
| 422768 | F | Somalia Re A Level or     | 0 | 60  | N | Pass      |
| 423061 | M | Tigray Region HE Qualific | 2 | 120 | N | Fail      |
| 423386 | F | Oromia Re Lower Than      | 0 | 60  | N | Withdrawn |
| 423474 | F | Addis Abat HE Qualific    | 0 | 120 | N | Withdrawn |
| 423757 | M | South Wes A Level or      | 0 | 60  | N | Fail      |
| 423876 | M | Somalia Re Post Gradu     | 0 | 60  | N | Withdrawn |
| 424987 | M | Tigray Region A Level or  | 0 | 120 | N | Pass      |
| 425136 | M | Tigray Region Lower Than  | 0 | 60  | N | Fail      |
| 426059 | M | North Region A Level or   | 0 | 60  | N | Withdrawn |
| 426094 | M | Sidamo Region A Level or  | 1 | 240 | N | Withdrawn |
| 426137 | M | South Wes A Level or      | 1 | 60  | N | Withdrawn |
| 426701 | F | Sidamo Region A Level or  | 0 | 240 | N | Withdrawn |
| 426871 | M | Oromia Re Lower Than      | 1 | 60  | N | Pass      |
| 428411 | F | Addis Abat HE Qualific    | 0 | 150 | N | Withdrawn |
| 429833 | F | Addis Abat Lower Than     | 0 | 60  | N | Fail      |
| 430055 | F | Sidamo Region A Level or  | 0 | 120 | Y | Withdrawn |
| 430279 | F | Amhara Region A Level or  | 0 | 60  | N | Withdrawn |
| 430516 | M | Somalia Re Lower Than     | 1 | 180 | N | Withdrawn |
| 431005 | M | Sidamo Region A Level or  | 1 | 150 | N | Withdrawn |
| 432204 | F | Sidamo Region A Level or  | 0 | 60  | N | Withdrawn |
| 433151 | F | South Region A Level or   | 1 | 120 | Y | Pass      |
| 433386 | F | Somalia Re A Level or     | 0 | 60  | N | Pass      |
| 434767 | M | Addis Abat Lower Than     | 0 | 60  | N | Withdrawn |
| 434977 | F | Addis Abat A Level or     | 1 | 60  | N | Pass      |
| 435101 | M | Addis Abat Lower Than     | 1 | 240 | N | Fail      |
| 435423 | M | South Wes A Level or      | 1 | 130 | N | Pass      |
| 435780 | F | Afar Region Lower Than    | 1 | 180 | N | Withdrawn |
| 436554 | M | Oromia Re Lower Than      | 1 | 120 | N | Withdrawn |
| 437281 | M | South Region A Level or   | 0 | 80  | N | Pass      |
| 437747 | F | Amhara Region A Level or  | 0 | 105 | N | Withdrawn |
| 438244 | M | Oromia Re HE Qualific     | 0 | 60  | N | Fail      |
| 438662 | M | South Wes Lower Than      | 1 | 60  | N | Fail      |
| 439013 | M | Amhara Re Lower Than      | 0 | 60  | N | Fail      |
| 439542 | F | Afar Region A Level or    | 0 | 120 | N | Fail      |
| 440375 | M | South Region A Level or   | 0 | 60  | N | Fail      |
| 440499 | M | Sidamo Region HE Qualific | 0 | 60  | N | Pass      |
| 440857 | F | South Region Lower Than   | 1 | 120 | N | Withdrawn |
| 441113 | M | South Region Lower Than   | 0 | 75  | N | Pass      |
| 441132 | M | Afar Region HE Qualific   | 0 | 60  | N | Pass      |
| 441201 | M | South Wes Lower Than      | 0 | 60  | N | Pass      |
| 441302 | M | Sidamo Region Lower Than  | 0 | 60  | N | Pass      |
| 441389 | F | South Wes A Level or      | 0 | 60  | N | Pass      |
| 442131 | M | Oromia Re Lower Than      | 0 | 60  | N | Fail      |
| 442545 | F | Tigray Region HE Qualific | 0 | 60  | N | Pass      |
| 442865 | F | South Wes Lower Than      | 0 | 60  | N | Fail      |

|        |   |                          |   |     |   |             |
|--------|---|--------------------------|---|-----|---|-------------|
| 442886 | M | Addis Abat Lower Tha     | 0 | 60  | N | Pass        |
| 443055 | F | South Regi Lower Tha     | 2 | 180 | N | Fail        |
| 443215 | F | Tigrai Regi Lower Tha    | 0 | 60  | N | Pass        |
| 443297 | M | South Regi A Level or I  | 0 | 60  | N | Pass        |
| 443500 | M | Oromia Re HE Qualific    | 1 | 120 | N | Withdrawn   |
| 443842 | M | North Regi Lower Tha     | 0 | 60  | N | Fail        |
| 444576 | F | Addis Abat A Level or I  | 0 | 60  | N | Fail        |
| 444713 | F | Amhara Re A Level or I   | 0 | 90  | Y | Withdrawn   |
| 445134 | M | Afar Regioi A Level or I | 2 | 120 | N | Fail        |
| 445573 | F | South Regi A Level or I  | 0 | 60  | Y | Fail        |
| 446814 | M | Addis Abat A Level or I  | 0 | 120 | N | Pass        |
| 446836 | M | Oromia Re A Level or I   | 0 | 60  | Y | Fail        |
| 447242 | M | Sidamo Re HE Qualific    | 1 | 120 | N | Pass        |
| 464236 | M | Sidamo Re HE Qualific    | 0 | 60  | N | Pass        |
| 464596 | M | Addis Abat Lower Tha     | 0 | 60  | N | Withdrawn   |
| 464615 | M | Addis Abat Lower Tha     | 0 | 120 | N | Withdrawn   |
| 465068 | F | South Regi HE Qualific   | 1 | 120 | N | Withdrawn   |
| 465260 | M | Somalia Re A Level or I  | 0 | 120 | N | Pass        |
| 465399 | F | Somalia Re Lower Tha     | 2 | 180 | Y | Withdrawn   |
| 465727 | M | Addis Abat Lower Tha     | 0 | 60  | Y | Pass        |
| 465764 | F | Somalia Re Lower Tha     | 0 | 60  | Y | Pass        |
| 465843 | M | South Regi A Level or I  | 1 | 60  | N | Distinction |
| 466158 | F | South Regi Lower Tha     | 0 | 90  | Y | Withdrawn   |
| 466216 | M | Addis Abat HE Qualific   | 0 | 90  | N | Distinction |
| 466990 | F | Tigrai Regi Lower Tha    | 0 | 60  | N | Fail        |
| 467294 | M | Oromia Re A Level or I   | 0 | 60  | N | Pass        |
| 467413 | F | Addis Abat Lower Tha     | 1 | 210 | N | Pass        |
| 467822 | F | Tigrai Regi A Level or I | 0 | 190 | N | Pass        |
| 468672 | M | Amhara Re A Level or I   | 1 | 120 | N | Withdrawn   |
| 468729 | M | Afar Regioi A Level or I | 0 | 105 | N | Withdrawn   |
| 468808 | M | South Regi A Level or I  | 1 | 90  | N | Pass        |
| 469016 | M | Oromia Re A Level or I   | 0 | 60  | N | Pass        |
| 470119 | M | South Regi Lower Tha     | 0 | 60  | N | Withdrawn   |
| 470637 | M | Tigrai Regi Lower Tha    | 1 | 150 | Y | Withdrawn   |
| 470921 | M | South Regi A Level or I  | 0 | 60  | N | Fail        |
| 471654 | M | South Wes Lower Tha      | 0 | 120 | N | Pass        |
| 471781 | F | Afar Regioi A Level or I | 1 | 120 | N | Withdrawn   |
| 472060 | F | Oromia Re Lower Tha      | 1 | 60  | N | Withdrawn   |
| 472180 | M | South Regi Lower Tha     | 0 | 60  | N | Fail        |
| 472584 | M | Somalia Re Lower Tha     | 1 | 180 | N | Pass        |
| 472949 | F | Sidamo Re HE Qualific    | 1 | 120 | N | Fail        |
| 473008 | F | South Wes Lower Tha      | 0 | 120 | N | Pass        |
| 473640 | M | Amhara Re Lower Tha      | 0 | 60  | N | Withdrawn   |
| 473965 | M | Somalia Re A Level or I  | 0 | 60  | N | Pass        |
| 474133 | M | South Wes Lower Tha      | 1 | 240 | Y | Fail        |
| 474153 | M | Sidamo Re Lower Tha      | 1 | 150 | N | Withdrawn   |
| 474451 | M | Amhara Re Lower Tha      | 0 | 60  | Y | Fail        |



|        |   |                          |   |     |   |             |
|--------|---|--------------------------|---|-----|---|-------------|
| 474464 | M | South Regi Lower Tha     | 0 | 60  | N | Pass        |
| 474633 | F | Sidamo Re Lower Tha      | 1 | 120 | N | Pass        |
| 474740 | M | Somalia Re A Level or I  | 1 | 150 | N | Pass        |
| 474966 | F | Amhara Re Lower Tha      | 1 | 120 | N | Withdrawn   |
| 475443 | M | South Regi Lower Tha     | 0 | 180 | N | Withdrawn   |
| 475480 | M | Amhara Re A Level or I   | 0 | 60  | N | Withdrawn   |
| 475604 | F | South Wes A Level or I   | 0 | 60  | Y | Withdrawn   |
| 475619 | M | Afar Regio HE Qualific   | 0 | 60  | N | Withdrawn   |
| 475883 | M | South Regi HE Qualific   | 1 | 120 | N | Pass        |
| 475897 | M | North Regi A Level or I  | 0 | 120 | N | Pass        |
| 476041 | F | North Regi A Level or I  | 0 | 60  | N | Pass        |
| 476093 | F | South Regi Lower Tha     | 1 | 120 | N | Fail        |
| 476637 | M | North Regi HE Qualific   | 1 | 240 | N | Distinction |
| 476910 | M | Somalia Re A Level or I  | 0 | 60  | N | Pass        |
| 476964 | M | South Regi HE Qualific   | 0 | 90  | N | Distinction |
| 477160 | F | South Wes HE Qualific    | 1 | 120 | N | Withdrawn   |
| 477451 | M | South Regi A Level or I  | 0 | 60  | Y | Pass        |
| 477517 | M | South Regi Post Gradu    | 0 | 70  | N | Pass        |
| 478213 | M | North Regi Post Gradu    | 0 | 120 | N | Pass        |
| 478346 | M | Oromia Re HE Qualific    | 0 | 60  | N | Distinction |
| 478744 | F | Amhara Re A Level or I   | 1 | 180 | N | Withdrawn   |
| 479347 | M | Addis Abak Lower Tha     | 0 | 70  | Y | Withdrawn   |
| 479607 | M | Tigrai Regi A Level or I | 0 | 120 | N | Withdrawn   |
| 480207 | M | Amhara Re A Level or I   | 1 | 120 | Y | Pass        |
| 480225 | F | Addis Abak Lower Tha     | 1 | 120 | N | Fail        |
| 480929 | M | South Wes HE Qualific    | 0 | 60  | N | Distinction |
| 480972 | M | Afar Regio A Level or I  | 0 | 70  | N | Fail        |
| 481350 | F | Sidamo Re A Level or I   | 0 | 60  | N | Pass        |
| 481549 | F | South Regi A Level or I  | 0 | 120 | N | Pass        |
| 482117 | M | Amhara Re Lower Tha      | 0 | 180 | N | Fail        |
| 482856 | F | South Wes HE Qualific    | 0 | 60  | N | Pass        |
| 483275 | M | Oromia Re A Level or I   | 0 | 90  | N | Fail        |
| 483470 | M | Oromia Re HE Qualific    | 0 | 120 | N | Fail        |
| 483818 | F | South Regi A Level or I  | 1 | 120 | N | Pass        |
| 483869 | M | North Regi Lower Tha     | 0 | 180 | Y | Fail        |
| 484266 | M | Afar Regio Lower Tha     | 0 | 120 | N | Withdrawn   |
| 484754 | M | South Regi Lower Tha     | 1 | 120 | N | Withdrawn   |
| 484816 | M | Sidamo Re Lower Tha      | 0 | 60  | N | Fail        |
| 484999 | M | South Regi Lower Tha     | 0 | 120 | N | Withdrawn   |
| 485464 | M | Somalia Re A Level or I  | 1 | 180 | N | Pass        |
| 485519 | F | Amhara Re A Level or I   | 0 | 120 | N | Withdrawn   |
| 485532 | M | Addis Abak A Level or I  | 1 | 180 | N | Fail        |
| 485766 | M | South Wes A Level or I   | 0 | 60  | N | Pass        |
| 485943 | F | Addis Abak No Formal     | 0 | 60  | N | Withdrawn   |
| 487247 | M | South Wes A Level or I   | 1 | 210 | N | Withdrawn   |
| 487267 | F | Afar Regio Lower Tha     | 0 | 60  | Y | Withdrawn   |
| 487711 | F | Sidamo Re HE Qualific    | 0 | 120 | N | Distinction |

|        |   |                          |   |     |   |             |
|--------|---|--------------------------|---|-----|---|-------------|
| 488694 | M | South Regi HE Qualific   | 0 | 60  | N | Withdrawn   |
| 489291 | F | Amhara Re Lower Thar     | 1 | 120 | N | Fail        |
| 489313 | M | South Wes HE Qualific    | 0 | 60  | N | Withdrawn   |
| 491106 | M | South Regi Lower Thar    | 0 | 60  | N | Pass        |
| 491108 | F | South Wes A Level or I   | 0 | 60  | N | Distinction |
| 491693 | M | South Regi A Level or I  | 1 | 120 | N | Fail        |
| 491757 | M | Amhara Re Lower Thar     | 1 | 210 | Y | Withdrawn   |
| 491885 | F | Addis Abak Lower Thar    | 1 | 210 | Y | Withdrawn   |
| 491914 | M | South Regi A Level or I  | 0 | 60  | N | Pass        |
| 492177 | M | Somalia Re HE Qualific   | 1 | 120 | N | Fail        |
| 492371 | F | South Wes A Level or I   | 0 | 60  | Y | Pass        |
| 492613 | F | Sidamo Re A Level or I   | 0 | 60  | N | Pass        |
| 492993 | M | Addis Abak A Level or I  | 0 | 60  | N | Fail        |
| 493365 | M | Amhara Re A Level or I   | 1 | 180 | N | Withdrawn   |
| 493984 | F | Addis Abak A Level or I  | 0 | 60  | N | Withdrawn   |
| 494341 | F | Amhara Re A Level or I   | 0 | 60  | N | Pass        |
| 494637 | M | Amhara Re A Level or I   | 0 | 80  | N | Distinction |
| 494806 | M | Afar Regioi Lower Thar   | 0 | 90  | N | Fail        |
| 494919 | F | Afar Regioi A Level or I | 0 | 60  | Y | Pass        |
| 495115 | F | Somalia Re Lower Thar    | 0 | 90  | Y | Withdrawn   |
| 495298 | F | South Wes A Level or I   | 0 | 60  | N | Withdrawn   |
| 495734 | M | Sidamo Re A Level or I   | 0 | 60  | N | Pass        |
| 495786 | M | Afar Regioi HE Qualific  | 0 | 120 | Y | Fail        |
| 496217 | M | South Wes A Level or I   | 0 | 60  | N | Fail        |
| 496542 | M | Tigrai Regio Lower Thar  | 0 | 60  | N | Withdrawn   |
| 496564 | F | Oromia Re A Level or I   | 0 | 120 | N | Distinction |
| 496601 | F | Sidamo Re HE Qualific    | 0 | 80  | N | Pass        |
| 497405 | M | Sidamo Re HE Qualific    | 0 | 120 | N | Withdrawn   |
| 497475 | M | Amhara Re Lower Thar     | 0 | 60  | N | Withdrawn   |
| 497584 | F | Amhara Re A Level or I   | 0 | 90  | Y | Withdrawn   |
| 497898 | F | South Wes A Level or I   | 0 | 145 | N | Withdrawn   |
| 498320 | F | Afar Regioi A Level or I | 0 | 70  | Y | Pass        |
| 498363 | F | Addis Abak Lower Thar    | 1 | 120 | Y | Withdrawn   |
| 498432 | F | South Wes A Level or I   | 0 | 150 | N | Withdrawn   |
| 498527 | M | Afar Regioi HE Qualific  | 0 | 60  | N | Pass        |
| 498835 | F | South Regi A Level or I  | 0 | 60  | N | Pass        |
| 499056 | M | South Regi A Level or I  | 0 | 120 | N | Pass        |
| 499246 | F | South Wes A Level or I   | 0 | 180 | Y | Pass        |
| 499557 | M | Afar Regioi A Level or I | 0 | 60  | N | Pass        |
| 500006 | M | Sidamo Re A Level or I   | 1 | 210 | Y | Pass        |
| 500136 | F | South Wes A Level or I   | 0 | 120 | N | Pass        |
| 500459 | F | South Wes Lower Thar     | 0 | 60  | N | Pass        |
| 500522 | F | Addis Abak A Level or I  | 0 | 60  | N | Withdrawn   |
| 500766 | F | Sidamo Re HE Qualific    | 0 | 60  | N | Distinction |
| 501158 | M | South Wes Lower Thar     | 0 | 120 | N | Pass        |
| 501960 | F | South Regi A Level or I  | 0 | 60  | N | Pass        |
| 502136 | F | North Regi A Level or I  | 0 | 120 | N | Distinction |

|        |   |                          |   |     |   |             |
|--------|---|--------------------------|---|-----|---|-------------|
| 502554 | M | South Regi HE Qualific   | 0 | 60  | N | Distinction |
| 502697 | M | Oromia Re A Level or I   | 0 | 60  | N | Fail        |
| 502736 | M | Somalia Re Lower Than    | 1 | 120 | N | Fail        |
| 502903 | M | South Regi Lower Than    | 1 | 180 | N | Withdrawn   |
| 503086 | F | North Regi Lower Than    | 0 | 60  | N | Pass        |
| 503100 | M | Sidamo Re Lower Than     | 0 | 120 | N | Withdrawn   |
| 503120 | M | South Regi Lower Than    | 0 | 120 | N | Fail        |
| 503170 | M | South Regi A Level or I  | 0 | 120 | N | Fail        |
| 503368 | F | South Wes Lower Than     | 0 | 60  | N | Pass        |
| 503497 | M | Oromia Re Lower Than     | 0 | 60  | N | Distinction |
| 503731 | M | South Wes A Level or I   | 0 | 90  | N | Fail        |
| 503926 | F | Addis Abat A Level or I  | 0 | 60  | N | Pass        |
| 504246 | F | South Regi A Level or I  | 1 | 120 | N | Withdrawn   |
| 504602 | M | Addis Abat HE Qualific   | 0 | 120 | N | Withdrawn   |
| 504819 | F | Addis Abat Lower Than    | 0 | 60  | N | Fail        |
| 505311 | M | Sidamo Re Lower Than     | 0 | 120 | N | Pass        |
| 505579 | F | South Regi A Level or I  | 0 | 60  | N | Pass        |
| 506056 | M | Amhara Re Lower Than     | 0 | 120 | N | Fail        |
| 506767 | F | Tigrai Regi Lower Than   | 0 | 60  | N | Fail        |
| 506785 | M | Somalia Re A Level or I  | 0 | 120 | N | Pass        |
| 506829 | F | Amhara Re A Level or I   | 1 | 210 | N | Withdrawn   |
| 507730 | M | Sidamo Re Lower Than     | 0 | 60  | N | Fail        |
| 508934 | F | South Wes Lower Than     | 0 | 60  | N | Pass        |
| 509634 | M | Addis Abat Lower Than    | 1 | 240 | Y | Withdrawn   |
| 509680 | M | Afar Regioi A Level or I | 0 | 60  | N | Withdrawn   |
| 509873 | F | South Wes A Level or I   | 1 | 180 | N | Fail        |
| 510195 | M | Sidamo Re A Level or I   | 0 | 60  | N | Pass        |
| 510530 | M | Oromia Re A Level or I   | 0 | 120 | N | Withdrawn   |
| 511109 | M | Sidamo Re HE Qualific    | 1 | 120 | N | Fail        |
| 511271 | F | South Regi Lower Than    | 1 | 120 | N | Fail        |
| 511514 | M | Addis Abat A Level or I  | 1 | 120 | N | Withdrawn   |
| 511544 | F | North Regi A Level or I  | 1 | 150 | N | Fail        |
| 511569 | F | South Regi Lower Than    | 0 | 60  | Y | Withdrawn   |
| 511576 | M | Somalia Re A Level or I  | 0 | 60  | N | Fail        |
| 511949 | F | South Regi Lower Than    | 0 | 60  | N | Fail        |
| 511958 | F | Amhara Re Lower Than     | 0 | 60  | N | Withdrawn   |
| 512080 | F | Sidamo Re A Level or I   | 0 | 120 | N | Pass        |
| 512404 | F | Amhara Re A Level or I   | 0 | 180 | Y | Withdrawn   |
| 512861 | F | South Wes A Level or I   | 1 | 120 | N | Pass        |
| 513246 | F | Amhara Re Lower Than     | 1 | 120 | N | Withdrawn   |
| 513396 | F | South Wes HE Qualific    | 1 | 180 | N | Fail        |
| 513687 | M | Amhara Re Lower Than     | 0 | 60  | N | Withdrawn   |
| 513773 | F | Sidamo Re HE Qualific    | 0 | 90  | N | Pass        |
| 513854 | M | Addis Abat Lower Than    | 0 | 60  | N | Pass        |
| 514028 | M | South Regi A Level or I  | 1 | 120 | N | Withdrawn   |
| 514218 | F | Oromia Re Lower Than     | 0 | 60  | N | Withdrawn   |
| 514300 | F | Oromia Re A Level or I   | 1 | 180 | N | Pass        |

|        |   |                          |   |     |   |             |
|--------|---|--------------------------|---|-----|---|-------------|
| 514633 | M | Amhara Re Lower Tha      | 1 | 120 | Y | Fail        |
| 514773 | F | South Regi A Level or I  | 0 | 120 | N | Withdrawn   |
| 515046 | M | South Wes Lower Tha      | 0 | 60  | Y | Pass        |
| 515170 | F | Oromia Re A Level or I   | 0 | 60  | N | Fail        |
| 515595 | M | Afar Regioi A Level or I | 1 | 180 | N | Pass        |
| 515812 | F | Sidamo Re A Level or I   | 0 | 60  | N | Withdrawn   |
| 515903 | F | Amhara Re A Level or I   | 0 | 120 | N | Pass        |
| 515945 | M | Sidamo Re A Level or I   | 0 | 60  | N | Distinction |
| 516010 | F | North Regi No Formal     | 0 | 60  | N | Pass        |
| 516281 | M | Afar Regioi A Level or I | 1 | 120 | N | Fail        |
| 516398 | M | North Regi HE Qualific   | 0 | 60  | N | Pass        |
| 516450 | F | Somalia Re A Level or I  | 1 | 150 | N | Distinction |
| 516843 | M | Afar Regioi A Level or I | 0 | 120 | N | Withdrawn   |
| 517646 | F | Tigrai Regi HE Qualific  | 1 | 180 | N | Pass        |
| 517726 | M | South Regi Lower Tha     | 1 | 120 | N | Withdrawn   |
| 518097 | M | Afar Regioi A Level or I | 1 | 120 | Y | Fail        |
| 518155 | M | Sidamo Re HE Qualific    | 1 | 120 | N | Withdrawn   |
| 518349 | M | North Regi Lower Tha     | 0 | 60  | Y | Pass        |
| 518436 | M | North Regi Lower Tha     | 0 | 120 | N | Pass        |
| 518451 | M | Addis Abak A Level or I  | 0 | 60  | N | Withdrawn   |
| 519094 | F | Afar Regioi A Level or I | 0 | 60  | N | Pass        |
| 519102 | M | Somalia Re Lower Tha     | 0 | 60  | N | Fail        |
| 519491 | F | Oromia Re A Level or I   | 0 | 120 | N | Withdrawn   |
| 520026 | M | Sidamo Re A Level or I   | 0 | 120 | N | Withdrawn   |
| 520092 | M | South Regi Lower Tha     | 0 | 120 | Y | Withdrawn   |
| 520400 | M | Sidamo Re A Level or I   | 1 | 120 | N | Fail        |
| 520751 | F | Tigrai Regi Lower Tha    | 0 | 60  | N | Withdrawn   |
| 521160 | F | Somalia Re A Level or I  | 1 | 120 | N | Pass        |
| 521404 | M | Addis Abak A Level or I  | 0 | 60  | N | Distinction |
| 521709 | M | Somalia Re A Level or I  | 0 | 120 | N | Pass        |
| 521742 | M | Amhara Re Lower Tha      | 0 | 120 | N | Fail        |
| 521755 | F | North Regi Lower Tha     | 1 | 120 | N | Withdrawn   |
| 522538 | F | Sidamo Re A Level or I   | 0 | 180 | N | Withdrawn   |
| 522572 | M | South Regi A Level or I  | 0 | 60  | N | Pass        |
| 522654 | M | Amhara Re HE Qualific    | 0 | 60  | N | Pass        |
| 522739 | F | South Wes Lower Tha      | 1 | 180 | Y | Withdrawn   |
| 522878 | M | Oromia Re Lower Tha      | 1 | 120 | N | Withdrawn   |
| 523392 | F | Tigrai Regi Lower Tha    | 0 | 60  | N | Fail        |
| 524020 | M | Somalia Re Lower Tha     | 0 | 120 | N | Withdrawn   |
| 524137 | F | Amhara Re A Level or I   | 0 | 60  | N | Withdrawn   |
| 524160 | M | North Regi Post Gradu    | 0 | 60  | N | Pass        |
| 524175 | M | South Wes Lower Tha      | 1 | 120 | N | Fail        |
| 524261 | F | Afar Regioi HE Qualific  | 0 | 120 | Y | Withdrawn   |
| 524369 | F | Tigrai Regi Lower Tha    | 0 | 70  | N | Pass        |
| 524374 | M | Amhara Re A Level or I   | 0 | 120 | N | Withdrawn   |
| 524378 | F | Amhara Re A Level or I   | 0 | 60  | N | Pass        |
| 524396 | F | South Wes A Level or I   | 0 | 60  | N | Pass        |

|        |   |                          |   |     |   |             |
|--------|---|--------------------------|---|-----|---|-------------|
| 524731 | M | South Regi A Level or I  | 1 | 180 | N | Fail        |
| 525066 | F | North Regi Lower Tha     | 0 | 90  | N | Fail        |
| 525128 | M | Tigrai Regi Lower Tha    | 0 | 90  | N | Fail        |
| 525749 | F | North Regi Post Gradu    | 0 | 70  | N | Distinction |
| 525762 | F | Tigrai Regi Lower Tha    | 0 | 60  | N | Withdrawn   |
| 525820 | F | Addis Abak Lower Tha     | 0 | 120 | N | Fail        |
| 525854 | M | Amhara Re A Level or I   | 1 | 180 | N | Fail        |
| 526068 | M | Afar Regio Lower Tha     | 0 | 60  | N | Pass        |
| 526392 | M | Tigrai Regi A Level or I | 1 | 120 | N | Fail        |
| 526426 | M | Tigrai Regi Lower Tha    | 0 | 60  | N | Withdrawn   |
| 526699 | F | South Regi Lower Tha     | 1 | 120 | Y | Withdrawn   |
| 527081 | M | Sidamo Re Lower Tha      | 1 | 120 | N | Withdrawn   |
| 527306 | F | Amhara Re Lower Tha      | 0 | 60  | N | Fail        |
| 527323 | F | Sidamo Re Lower Tha      | 1 | 120 | N | Fail        |
| 527403 | F | Somalia Re A Level or I  | 0 | 120 | N | Withdrawn   |
| 527533 | M | Somalia Re HE Qualific   | 0 | 60  | N | Withdrawn   |
| 527619 | M | South Wes A Level or I   | 0 | 160 | Y | Withdrawn   |
| 527747 | M | Addis Abak A Level or I  | 0 | 60  | N | Withdrawn   |
| 527789 | M | Sidamo Re HE Qualific    | 0 | 90  | N | Fail        |
| 527917 | M | Addis Abak Lower Tha     | 0 | 60  | N | Pass        |
| 528034 | M | Tigrai Regi A Level or I | 0 | 60  | N | Fail        |
| 528184 | F | Addis Abak A Level or I  | 0 | 75  | N | Pass        |
| 528271 | M | Tigrai Regi A Level or I | 0 | 75  | N | Withdrawn   |
| 528420 | F | Sidamo Re A Level or I   | 0 | 60  | N | Withdrawn   |
| 528642 | F | Tigrai Regi Lower Tha    | 0 | 130 | N | Withdrawn   |
| 528846 | M | South Wes HE Qualific    | 1 | 120 | N | Fail        |
| 528923 | M | Amhara Re Lower Tha      | 1 | 120 | N | Fail        |
| 529025 | M | South Regi A Level or I  | 0 | 60  | N | Pass        |
| 529078 | M | South Regi HE Qualific   | 0 | 60  | N | Pass        |
| 529384 | M | Sidamo Re A Level or I   | 0 | 120 | N | Withdrawn   |
| 529404 | M | Amhara Re A Level or I   | 0 | 60  | N | Pass        |
| 529525 | F | Amhara Re Lower Tha      | 1 | 120 | N | Withdrawn   |
| 529670 | M | Sidamo Re Lower Tha      | 0 | 60  | N | Withdrawn   |
| 529760 | M | Somalia Re Lower Tha     | 0 | 120 | N | Fail        |
| 529789 | M | Addis Abak Lower Tha     | 0 | 60  | N | Fail        |
| 529863 | M | Tigrai Regi Lower Tha    | 0 | 60  | N | Pass        |
| 529877 | M | Amhara Re Lower Tha      | 0 | 90  | Y | Withdrawn   |
| 530137 | M | Sidamo Re Lower Tha      | 0 | 90  | N | Withdrawn   |
| 530234 | F | South Regi A Level or I  | 0 | 60  | N | Pass        |
| 530748 | M | South Regi A Level or I  | 0 | 100 | N | Withdrawn   |
| 530762 | M | South Wes Lower Tha      | 0 | 90  | N | Withdrawn   |
| 530901 | M | Sidamo Re Lower Tha      | 0 | 90  | N | Withdrawn   |
| 531047 | M | South Wes Lower Tha      | 0 | 60  | N | Pass        |
| 531069 | M | Addis Abak Lower Tha     | 0 | 60  | Y | Withdrawn   |
| 531075 | M | North Regi Lower Tha     | 1 | 120 | N | Fail        |
| 531202 | M | Somalia Re A Level or I  | 0 | 60  | N | Distinction |
| 531340 | F | Addis Abak Lower Tha     | 1 | 180 | N | Withdrawn   |

|        |   |                          |   |     |   |             |
|--------|---|--------------------------|---|-----|---|-------------|
| 531377 | F | Amhara Re Lower Tha      | 0 | 60  | Y | Fail        |
| 531787 | M | Tigrai Regi A Level or I | 0 | 60  | N | Fail        |
| 531888 | F | Addis Abak Lower Tha     | 0 | 90  | N | Withdrawn   |
| 531924 | F | South Regi A Level or I  | 0 | 90  | N | Pass        |
| 532067 | F | Amhara Re A Level or I   | 0 | 120 | N | Withdrawn   |
| 532144 | M | Sidamo Re A Level or I   | 1 | 135 | N | Withdrawn   |
| 532267 | M | Sidamo Re Lower Tha      | 1 | 120 | N | Withdrawn   |
| 532491 | M | South Regi A Level or I  | 0 | 60  | N | Pass        |
| 532565 | M | Sidamo Re Lower Tha      | 0 | 60  | N | Pass        |
| 532648 | M | Sidamo Re A Level or I   | 0 | 90  | N | Withdrawn   |
| 532695 | F | Addis Abak A Level or I  | 0 | 60  | N | Fail        |
| 532718 | M | Amhara Re HE Qualific    | 0 | 60  | N | Distinction |
| 532745 | F | South Regi A Level or I  | 0 | 60  | N | Pass        |
| 532855 | M | South Regi A Level or I  | 0 | 60  | Y | Pass        |
| 532988 | M | South Wes A Level or I   | 0 | 60  | N | Fail        |
| 533004 | M | South Regi HE Qualific   | 0 | 60  | N | Fail        |
| 533291 | M | Addis Abak A Level or I  | 0 | 60  | N | Pass        |
| 533522 | F | Addis Abak A Level or I  | 0 | 60  | N | Fail        |
| 533731 | M | South Wes Lower Tha      | 0 | 60  | N | Fail        |
| 533829 | F | South Wes A Level or I   | 0 | 60  | N | Withdrawn   |
| 533877 | M | Oromia Re Lower Tha      | 0 | 60  | N | Distinction |
| 534203 | M | Sidamo Re Lower Tha      | 0 | 60  | N | Pass        |
| 534219 | M | Somalia Re Lower Tha     | 0 | 60  | N | Fail        |
| 534349 | F | Addis Abak A Level or I  | 0 | 60  | N | Withdrawn   |
| 534777 | M | Sidamo Re A Level or I   | 0 | 120 | N | Withdrawn   |
| 534910 | M | South Wes Lower Tha      | 0 | 90  | N | Pass        |
| 535169 | F | Sidamo Re Lower Tha      | 0 | 60  | N | Withdrawn   |
| 535215 | M | North Regi Lower Tha     | 0 | 90  | N | Pass        |
| 535424 | M | South Wes A Level or I   | 0 | 60  | N | Fail        |
| 535463 | M | South Regi Lower Tha     | 0 | 60  | N | Withdrawn   |
| 535486 | M | Sidamo Re A Level or I   | 0 | 60  | N | Withdrawn   |
| 535620 | M | South Wes Lower Tha      | 0 | 90  | N | Fail        |
| 535707 | F | South Wes A Level or I   | 0 | 60  | N | Withdrawn   |
| 535747 | F | Afar Regio HE Qualific   | 0 | 60  | N | Withdrawn   |
| 535789 | M | Sidamo Re Lower Tha      | 0 | 60  | N | Withdrawn   |
| 535799 | F | South Wes Lower Tha      | 0 | 60  | N | Pass        |
| 535831 | F | Somalia Re A Level or I  | 0 | 60  | N | Pass        |
| 535986 | F | North Regi No Formal     | 0 | 70  | N | Distinction |
| 536032 | M | Tigrai Regi A Level or I | 0 | 60  | N | Pass        |
| 536145 | M | South Regi Lower Tha     | 0 | 90  | Y | Withdrawn   |
| 536170 | M | Amhara Re HE Qualific    | 0 | 60  | N | Distinction |
| 536210 | M | South Wes Lower Tha      | 0 | 120 | Y | Withdrawn   |
| 536261 | M | South Regi A Level or I  | 0 | 60  | N | Pass        |
| 536536 | M | North Regi Lower Tha     | 0 | 60  | N | Pass        |
| 536696 | F | Afar Regio A Level or I  | 0 | 60  | N | Fail        |
| 536926 | M | Afar Regio A Level or I  | 0 | 60  | N | Pass        |
| 536999 | M | North Regi Lower Tha     | 0 | 60  | Y | Withdrawn   |

|        |   |                          |   |     |   |             |
|--------|---|--------------------------|---|-----|---|-------------|
| 537138 | M | South Wes A Level or l   | 0 | 60  | N | Pass        |
| 537139 | F | Somalia Re A Level or l  | 0 | 60  | N | Pass        |
| 537452 | M | Sidamo Re A Level or l   | 0 | 60  | N | Fail        |
| 537603 | M | Addis Abak Lower Tha     | 0 | 60  | N | Pass        |
| 537621 | M | Amhara Re A Level or l   | 0 | 60  | N | Fail        |
| 537622 | F | Amhara Re A Level or l   | 0 | 60  | Y | Pass        |
| 537652 | F | South Regi Lower Tha     | 0 | 60  | N | Withdrawn   |
| 537658 | F | Tigrai Regi Lower Tha    | 0 | 60  | N | Pass        |
| 537868 | F | Sidamo Re HE Qualific    | 0 | 60  | N | Fail        |
| 537926 | M | Amhara Re A Level or l   | 0 | 60  | N | Fail        |
| 538069 | M | Sidamo Re A Level or l   | 0 | 60  | N | Withdrawn   |
| 538131 | M | North Regi HE Qualific   | 0 | 60  | N | Withdrawn   |
| 538211 | M | Somalia Re Lower Tha     | 0 | 60  | N | Fail        |
| 538232 | F | Somalia Re Lower Tha     | 0 | 120 | N | Withdrawn   |
| 538251 | F | North Regi No Formal     | 0 | 60  | N | Distinction |
| 538611 | F | North Regi Lower Tha     | 0 | 60  | N | Fail        |
| 538701 | M | Sidamo Re A Level or l   | 0 | 60  | N | Pass        |
| 539035 | F | Sidamo Re A Level or l   | 0 | 60  | N | Fail        |
| 539043 | M | Somalia Re A Level or l  | 0 | 60  | N | Fail        |
| 539066 | F | South Wes A Level or l   | 0 | 60  | N | Pass        |
| 539142 | M | Afar Regio A Level or l  | 0 | 60  | N | Fail        |
| 539186 | F | Somalia Re A Level or l  | 0 | 120 | N | Withdrawn   |
| 539209 | F | Addis Abak A Level or l  | 0 | 60  | N | Pass        |
| 539224 | M | Amhara Re Lower Tha      | 0 | 60  | N | Withdrawn   |
| 539262 | M | Afar Regio Lower Tha     | 0 | 60  | N | Withdrawn   |
| 539302 | F | Sidamo Re A Level or l   | 0 | 60  | N | Withdrawn   |
| 539328 | M | South Wes A Level or l   | 0 | 90  | N | Pass        |
| 539622 | F | Tigrai Regi A Level or l | 0 | 60  | N | Pass        |
| 539643 | F | Amhara Re Lower Tha      | 0 | 60  | N | Pass        |
| 540207 | F | South Regi A Level or l  | 0 | 60  | N | Pass        |
| 540298 | M | Addis Abak A Level or l  | 0 | 60  | Y | Fail        |
| 540310 | M | South Wes A Level or l   | 0 | 120 | N | Pass        |
| 540422 | M | South Regi A Level or l  | 0 | 60  | N | Withdrawn   |
| 540530 | F | Amhara Re Lower Tha      | 0 | 120 | N | Withdrawn   |
| 540547 | M | South Wes Lower Tha      | 0 | 60  | N | Fail        |
| 540568 | M | North Regi A Level or l  | 0 | 120 | N | Withdrawn   |
| 540592 | F | Tigrai Regi A Level or l | 0 | 60  | N | Fail        |
| 540605 | M | Amhara Re Lower Tha      | 0 | 60  | N | Pass        |
| 540686 | M | Amhara Re Lower Tha      | 0 | 60  | N | Pass        |
| 540694 | M | South Wes A Level or l   | 0 | 60  | N | Pass        |
| 540758 | F | South Regi Lower Tha     | 0 | 90  | N | Fail        |
| 540759 | F | Sidamo Re No Formal      | 0 | 60  | N | Withdrawn   |
| 540848 | F | South Regi A Level or l  | 0 | 60  | N | Pass        |
| 540920 | M | Sidamo Re A Level or l   | 0 | 60  | N | Withdrawn   |
| 541202 | M | Oromia Re Lower Tha      | 0 | 60  | Y | Withdrawn   |
| 541228 | M | North Regi A Level or l  | 0 | 120 | N | Fail        |
| 541260 | M | South Regi A Level or l  | 0 | 120 | N | Fail        |

|        |   |                          |   |     |   |             |
|--------|---|--------------------------|---|-----|---|-------------|
| 541887 | F | South Wes Lower Thar     | 0 | 60  | N | Withdrawn   |
| 541977 | M | Sidamo Re Lower Thar     | 0 | 60  | N | Fail        |
| 542036 | M | Addis Abak A Level or I  | 0 | 60  | N | Pass        |
| 542049 | M | Sidamo Re HE Qualific    | 0 | 120 | N | Pass        |
| 542054 | M | Amhara Re A Level or I   | 0 | 90  | N | Pass        |
| 542205 | F | Addis Abak Lower Thar    | 0 | 60  | N | Pass        |
| 542293 | M | Amhara Re Lower Thar     | 0 | 60  | N | Pass        |
| 542372 | M | Oromia Re Lower Thar     | 0 | 60  | N | Fail        |
| 542394 | M | Sidamo Re Lower Thar     | 0 | 60  | N | Withdrawn   |
| 542476 | F | South Regi HE Qualific   | 0 | 60  | N | Withdrawn   |
| 543060 | F | South Regi A Level or I  | 0 | 90  | N | Pass        |
| 543202 | F | Sidamo Re HE Qualific    | 0 | 60  | N | Pass        |
| 543231 | M | Amhara Re Lower Thar     | 0 | 60  | N | Withdrawn   |
| 543340 | M | Amhara Re A Level or I   | 0 | 60  | N | Pass        |
| 543383 | M | North Regi A Level or I  | 0 | 60  | N | Withdrawn   |
| 543386 | M | South Wes Lower Thar     | 0 | 60  | N | Withdrawn   |
| 543421 | F | North Regi Lower Thar    | 0 | 60  | N | Withdrawn   |
| 543446 | M | South Regi Lower Thar    | 0 | 90  | N | Fail        |
| 543459 | M | Oromia Re Lower Thar     | 0 | 60  | N | Pass        |
| 543482 | F | South Regi Lower Thar    | 0 | 60  | N | Withdrawn   |
| 543510 | F | Amhara Re A Level or I   | 0 | 75  | N | Pass        |
| 543573 | M | Sidamo Re Lower Thar     | 0 | 60  | N | Pass        |
| 543663 | M | Amhara Re A Level or I   | 0 | 90  | N | Withdrawn   |
| 543683 | M | Afar Regio Lower Thar    | 0 | 60  | N | Withdrawn   |
| 543749 | M | South Regi Lower Thar    | 0 | 60  | Y | Fail        |
| 543756 | M | Sidamo Re A Level or I   | 0 | 60  | Y | Pass        |
| 543845 | M | Afar Regio A Level or I  | 0 | 180 | N | Withdrawn   |
| 543860 | M | Addis Abak Lower Thar    | 0 | 180 | N | Pass        |
| 543919 | M | Addis Abak Lower Thar    | 0 | 120 | N | Pass        |
| 544053 | M | South Regi A Level or I  | 0 | 60  | N | Pass        |
| 544063 | F | Addis Abak A Level or I  | 0 | 60  | N | Fail        |
| 544091 | M | Afar Regio HE Qualific   | 0 | 120 | N | Pass        |
| 544226 | M | Afar Regio A Level or I  | 0 | 60  | N | Fail        |
| 544284 | M | South Regi Lower Thar    | 0 | 60  | N | Fail        |
| 544296 | F | Sidamo Re A Level or I   | 0 | 90  | N | Withdrawn   |
| 544307 | M | South Wes A Level or I   | 0 | 60  | N | Pass        |
| 544352 | F | South Wes A Level or I   | 0 | 60  | N | Withdrawn   |
| 544356 | M | South Wes Lower Thar     | 0 | 90  | N | Withdrawn   |
| 544367 | M | Sidamo Re A Level or I   | 0 | 60  | N | Fail        |
| 544467 | M | Sidamo Re Lower Thar     | 0 | 60  | N | Pass        |
| 544556 | M | South Wes Lower Thar     | 0 | 60  | N | Fail        |
| 544603 | M | North Regi A Level or I  | 0 | 60  | N | Pass        |
| 544649 | M | North Regi Lower Thar    | 0 | 60  | N | Withdrawn   |
| 544839 | M | Tigrai Regi A Level or I | 0 | 60  | N | Distinction |
| 544907 | M | Amhara Re Lower Thar     | 0 | 60  | N | Fail        |
| 544942 | M | Sidamo Re Lower Thar     | 0 | 60  | N | Withdrawn   |
| 544943 | M | Amhara Re Lower Thar     | 0 | 60  | N | Fail        |



|        |   |                          |   |     |   |           |
|--------|---|--------------------------|---|-----|---|-----------|
| 545083 | F | Addis Abat Lower Tha     | 0 | 120 | N | Pass      |
| 545115 | M | Addis Abak A Level or I  | 0 | 60  | Y | Fail      |
| 545118 | M | Amhara Re A Level or I   | 0 | 90  | N | Pass      |
| 545201 | M | South Wes Lower Tha      | 0 | 60  | Y | Withdrawn |
| 545245 | M | South Regi Lower Tha     | 0 | 120 | Y | Fail      |
| 545387 | M | Sidamo Re, A Level or I  | 0 | 60  | N | Fail      |
| 545704 | M | Oromia Re Lower Tha      | 0 | 60  | Y | Pass      |
| 545770 | M | Sidamo Re, Lower Tha     | 0 | 60  | N | Withdrawn |
| 545993 | M | South Wes Lower Tha      | 0 | 60  | N | Fail      |
| 546000 | M | Sidamo Re, HE Qualific   | 0 | 60  | N | Fail      |
| 546054 | M | South Regi A Level or I  | 0 | 60  | N | Pass      |
| 546074 | F | Afar Regio, A Level or I | 0 | 60  | N | Pass      |
| 546089 | M | Afar Regio, HE Qualific  | 0 | 60  | N | Fail      |
| 546191 | M | South Wes A Level or I   | 0 | 60  | N | Pass      |
| 546221 | F | Somalia Re Lower Tha     | 0 | 60  | N | Pass      |
| 546293 | M | Afar Regio, HE Qualific  | 0 | 60  | Y | Withdrawn |
| 546339 | F | Afar Regio, A Level or I | 0 | 60  | Y | Withdrawn |
| 546403 | M | Amhara Re Lower Tha      | 0 | 60  | N | Withdrawn |
| 546654 | M | Somalia Re A Level or I  | 0 | 60  | Y | Withdrawn |
| 546675 | F | South Wes A Level or I   | 0 | 60  | N | Pass      |
| 546747 | F | Afar Regio, Lower Tha    | 0 | 60  | N | Withdrawn |
| 546804 | M | South Wes A Level or I   | 0 | 60  | N | Fail      |
| 546826 | F | Sidamo Re, Lower Tha     | 0 | 60  | N | Pass      |
| 546830 | F | Sidamo Re, A Level or I  | 0 | 60  | N | Fail      |
| 546861 | F | South Regi Lower Tha     | 0 | 60  | N | Withdrawn |
| 546862 | F | South Regi A Level or I  | 0 | 60  | Y | Pass      |
| 546953 | M | Afar Regio, A Level or I | 0 | 60  | N | Pass      |
| 547252 | F | South Regi Lower Tha     | 0 | 60  | N | Withdrawn |
| 547349 | M | North Regi Lower Tha     | 0 | 60  | N | Pass      |
| 547445 | F | South Regi Lower Tha     | 0 | 60  | N | Pass      |
| 547486 | M | Sidamo Re, Lower Tha     | 0 | 60  | N | Fail      |
| 547522 | F | Afar Regio, A Level or I | 0 | 60  | N | Fail      |
| 547629 | F | Somalia Re Lower Tha     | 0 | 60  | N | Withdrawn |
| 547679 | F | Afar Regio, Lower Tha    | 0 | 60  | N | Fail      |
| 547784 | F | South Regi Lower Tha     | 0 | 60  | Y | Withdrawn |
| 547787 | M | Addis Abak Lower Tha     | 0 | 60  | Y | Withdrawn |
| 547897 | F | Afar Regio, Lower Tha    | 0 | 90  | N | Withdrawn |
| 547986 | F | South Regi A Level or I  | 0 | 60  | N | Fail      |
| 548069 | M | Oromia Re A Level or I   | 0 | 60  | N | Pass      |
| 548132 | M | Amhara Re Lower Tha      | 0 | 60  | N | Withdrawn |
| 548173 | F | Addis Abak Lower Tha     | 0 | 60  | N | Withdrawn |
| 548267 | F | Addis Abak A Level or I  | 0 | 60  | N | Pass      |
| 548271 | F | Afar Regio, A Level or I | 0 | 60  | N | Fail      |
| 548371 | M | Amhara Re A Level or I   | 0 | 60  | N | Fail      |
| 548420 | F | South Regi A Level or I  | 0 | 60  | N | Withdrawn |
| 548473 | M | South Wes Lower Tha      | 0 | 60  | N | Fail      |
| 548535 | F | Oromia Re A Level or I   | 0 | 60  | Y | Pass      |

|        |   |                          |   |     |   |           |
|--------|---|--------------------------|---|-----|---|-----------|
| 548602 | M | South Regi A Level or I  | 0 | 60  | N | Pass      |
| 548650 | F | Oromia Re Lower Tha      | 0 | 60  | N | Withdrawn |
| 548677 | M | South Wes A Level or I   | 0 | 60  | N | Pass      |
| 548679 | M | Addis Abak Lower Tha     | 0 | 60  | N | Fail      |
| 548739 | M | Addis Abak Lower Tha     | 0 | 60  | Y | Withdrawn |
| 548773 | M | Amhara Re A Level or I   | 0 | 60  | N | Fail      |
| 548797 | M | Afar Regioi Lower Tha    | 0 | 60  | N | Withdrawn |
| 548869 | F | Afar Regioi HE Qualific  | 0 | 60  | N | Fail      |
| 548872 | M | South Wes Lower Tha      | 0 | 60  | N | Withdrawn |
| 548959 | F | Tigrai Regi A Level or I | 0 | 60  | N | Fail      |
| 548993 | F | South Regi Lower Tha     | 0 | 90  | N | Withdrawn |
| 548996 | M | Somalia Re HE Qualific   | 0 | 60  | N | Pass      |
| 549038 | M | Tigrai Regi Lower Tha    | 0 | 60  | N | Pass      |
| 549095 | M | Afar Regioi HE Qualific  | 0 | 60  | N | Pass      |
| 549125 | M | South Wes A Level or I   | 0 | 120 | N | Pass      |
| 549135 | F | South Regi A Level or I  | 0 | 60  | Y | Pass      |
| 549156 | M | Amhara Re Lower Tha      | 0 | 60  | N | Withdrawn |
| 549213 | F | Sidamo Re A Level or I   | 0 | 60  | N | Withdrawn |
| 549283 | M | Afar Regioi HE Qualific  | 0 | 60  | N | Fail      |
| 549334 | M | North Regi Lower Tha     | 0 | 60  | N | Withdrawn |
| 549354 | M | Tigrai Regi Lower Tha    | 0 | 120 | N | Fail      |
| 549361 | F | Sidamo Re Lower Tha      | 0 | 60  | Y | Withdrawn |
| 549424 | M | South Regi Post Gradu    | 0 | 60  | N | Withdrawn |
| 549498 | M | Afar Regioi Lower Tha    | 0 | 60  | N | Fail      |
| 549545 | M | Oromia Re Lower Tha      | 0 | 60  | N | Pass      |
| 549575 | M | Addis Abak Lower Tha     | 0 | 60  | N | Withdrawn |
| 549684 | M | Tigrai Regi Post Gradu   | 0 | 60  | N | Pass      |
| 549690 | F | Amhara Re A Level or I   | 0 | 60  | N | Pass      |
| 549698 | F | South Wes A Level or I   | 0 | 60  | N | Pass      |
| 549710 | M | Somalia Re Lower Tha     | 0 | 60  | N | Pass      |
| 549731 | M | Afar Regioi Lower Tha    | 0 | 60  | N | Pass      |
| 549783 | M | Addis Abak Lower Tha     | 0 | 60  | N | Pass      |
| 549795 | F | South Wes A Level or I   | 0 | 60  | N | Pass      |
| 549872 | M | Amhara Re Lower Tha      | 0 | 60  | N | Pass      |
| 549897 | F | Sidamo Re Lower Tha      | 0 | 60  | N | Fail      |
| 549913 | F | Somalia Re A Level or I  | 0 | 60  | Y | Withdrawn |
| 549928 | M | South Wes A Level or I   | 0 | 60  | N | Withdrawn |
| 550064 | M | Somalia Re A Level or I  | 0 | 60  | N | Pass      |
| 550092 | M | Addis Abak A Level or I  | 0 | 60  | N | Pass      |
| 550142 | F | Oromia Re A Level or I   | 0 | 60  | N | Withdrawn |
| 550183 | M | North Regi A Level or I  | 0 | 60  | N | Withdrawn |
| 550205 | M | Sidamo Re HE Qualific    | 0 | 60  | Y | Withdrawn |
| 550348 | F | Tigrai Regi HE Qualific  | 0 | 60  | N | Fail      |
| 550371 | M | Oromia Re Lower Tha      | 0 | 60  | Y | Fail      |
| 550521 | M | South Wes Lower Tha      | 0 | 60  | N | Withdrawn |
| 550545 | F | Afar Regioi A Level or I | 0 | 60  | N | Pass      |
| 550604 | F | Afar Regioi HE Qualific  | 0 | 60  | N | Pass      |

|        |   |                         |   |     |   |             |
|--------|---|-------------------------|---|-----|---|-------------|
| 550657 | F | South Regi Lower Tha    | 0 | 60  | N | Withdrawn   |
| 550711 | M | Sidamo Re A Level or I  | 0 | 60  | N | Fail        |
| 550725 | M | South Wes A Level or I  | 0 | 60  | N | Pass        |
| 550762 | M | Sidamo Re Lower Tha     | 0 | 60  | N | Pass        |
| 550865 | M | Sidamo Re HE Qualific   | 0 | 60  | N | Pass        |
| 550893 | M | North Regi A Level or I | 0 | 60  | N | Fail        |
| 550974 | M | Sidamo Re Lower Tha     | 0 | 60  | Y | Fail        |
| 551169 | M | South Regi HE Qualific  | 0 | 60  | N | Fail        |
| 551183 | M | North Regi A Level or I | 0 | 60  | N | Pass        |
| 551334 | F | Oromia Re A Level or I  | 0 | 60  | N | Pass        |
| 551375 | F | South Wes Lower Tha     | 0 | 60  | N | Pass        |
| 551478 | M | South Wes A Level or I  | 0 | 90  | N | Pass        |
| 551550 | M | Sidamo Re A Level or I  | 0 | 120 | N | Pass        |
| 551573 | M | South Wes A Level or I  | 0 | 60  | N | Pass        |
| 551666 | M | South Regi Lower Tha    | 0 | 60  | N | Withdrawn   |
| 551979 | M | Afar Regio Lower Tha    | 0 | 60  | N | Fail        |
| 552030 | F | South Wes Lower Tha     | 0 | 60  | N | Withdrawn   |
| 552114 | F | South Wes Lower Tha     | 0 | 60  | N | Fail        |
| 552166 | M | South Regi Lower Tha    | 0 | 60  | N | Pass        |
| 552255 | M | Amhara Re A Level or I  | 0 | 90  | N | Withdrawn   |
| 552327 | M | South Wes A Level or I  | 0 | 60  | N | Withdrawn   |
| 552635 | F | South Regi Lower Tha    | 0 | 60  | N | Pass        |
| 552661 | M | Addis Abak Lower Tha    | 0 | 60  | N | Pass        |
| 552789 | F | Addis Abak A Level or I | 0 | 60  | N | Pass        |
| 552824 | M | South Regi Lower Tha    | 0 | 60  | N | Fail        |
| 552921 | F | South Wes A Level or I  | 0 | 60  | N | Distinction |
| 552955 | M | South Wes A Level or I  | 0 | 60  | N | Fail        |
| 552999 | F | Amhara Re Lower Tha     | 0 | 60  | N | Withdrawn   |
| 553253 | M | Sidamo Re HE Qualific   | 0 | 60  | N | Withdrawn   |
| 553275 | F | Somalia Re Lower Tha    | 0 | 60  | N | Pass        |
| 553382 | F | Addis Abak Lower Tha    | 0 | 60  | N | Pass        |
| 553575 | F | South Wes HE Qualific   | 0 | 60  | N | Pass        |
| 553627 | M | Addis Abak A Level or I | 0 | 60  | N | Withdrawn   |
| 553864 | M | Afar Regio A Level or I | 0 | 60  | N | Withdrawn   |
| 553964 | M | Amhara Re Lower Tha     | 0 | 60  | N | Pass        |
| 554046 | F | Sidamo Re Lower Tha     | 0 | 90  | N | Withdrawn   |
| 554161 | M | Amhara Re A Level or I  | 0 | 120 | N | Pass        |
| 554174 | M | Afar Regio HE Qualific  | 0 | 90  | N | Distinction |
| 554193 | F | Tigrai Regi HE Qualific | 0 | 60  | N | Fail        |
| 554205 | M | South Wes Lower Tha     | 0 | 60  | N | Pass        |
| 554245 | M | Addis Abak Lower Tha    | 0 | 60  | N | Pass        |
| 554295 | M | Amhara Re A Level or I  | 0 | 90  | Y | Pass        |
| 554300 | M | South Regi A Level or I | 0 | 60  | N | Pass        |
| 554446 | F | Amhara Re Lower Tha     | 0 | 60  | N | Pass        |
| 554484 | M | Afar Regio HE Qualific  | 0 | 60  | Y | Pass        |
| 554574 | F | Amhara Re A Level or I  | 0 | 60  | N | Pass        |
| 554587 | M | Tigrai Regi Lower Tha   | 0 | 60  | N | Withdrawn   |

|        |   |                         |   |     |   |             |
|--------|---|-------------------------|---|-----|---|-------------|
| 554588 | F | North Regi HE Qualific  | 0 | 90  | N | Withdrawn   |
| 554691 | M | Amhara Re Lower Thar    | 0 | 60  | Y | Withdrawn   |
| 554729 | M | Sidamo Re Lower Thar    | 0 | 60  | N | Withdrawn   |
| 554773 | M | South Regi Lower Thar   | 0 | 60  | N | Fail        |
| 554881 | M | South Regi Lower Thar   | 0 | 90  | N | Fail        |
| 554885 | M | Sidamo Re A Level or I  | 0 | 60  | N | Fail        |
| 554995 | M | North Regi A Level or I | 0 | 150 | N | Pass        |
| 555151 | F | South Regi Lower Thar   | 0 | 60  | N | Withdrawn   |
| 555297 | M | Amhara Re Lower Thar    | 0 | 60  | N | Withdrawn   |
| 555360 | M | South Regi Lower Thar   | 0 | 60  | N | Fail        |
| 555408 | M | South Regi A Level or I | 0 | 60  | N | Fail        |
| 555428 | M | Tigrai Regi HE Qualific | 0 | 60  | N | Fail        |
| 555446 | M | Addis Abak Lower Thar   | 0 | 60  | N | Withdrawn   |
| 555497 | M | South Wes A Level or I  | 0 | 60  | N | Fail        |
| 555740 | M | Sidamo Re A Level or I  | 0 | 60  | Y | Pass        |
| 555765 | M | South Regi A Level or I | 0 | 60  | N | Fail        |
| 555772 | M | Amhara Re A Level or I  | 0 | 100 | N | Fail        |
| 555830 | M | Oromia Re Lower Thar    | 0 | 60  | N | Withdrawn   |
| 556030 | M | Somalia Re HE Qualific  | 0 | 60  | N | Fail        |
| 556082 | M | Addis Abak A Level or I | 0 | 60  | N | Pass        |
| 556093 | F | South Regi A Level or I | 0 | 60  | N | Withdrawn   |
| 556165 | M | Tigrai Regi Lower Thar  | 0 | 60  | N | Fail        |
| 556185 | M | North Regi A Level or I | 0 | 60  | N | Distinction |
| 556295 | M | North Regi Lower Thar   | 0 | 60  | N | Fail        |
| 556308 | F | South Regi Lower Thar   | 0 | 60  | N | Withdrawn   |
| 556337 | F | Tigrai Regi Lower Thar  | 0 | 60  | Y | Pass        |
| 556354 | M | South Wes Lower Thar    | 0 | 60  | N | Withdrawn   |
| 556360 | M | Tigrai Regi Lower Thar  | 0 | 60  | N | Withdrawn   |
| 556362 | M | South Regi Lower Thar   | 0 | 60  | Y | Pass        |
| 556369 | M | South Regi HE Qualific  | 0 | 60  | N | Withdrawn   |
| 556370 | M | Afar Regi HE Qualific   | 0 | 60  | N | Fail        |
| 556373 | M | South Regi HE Qualific  | 0 | 60  | N | Distinction |
| 556389 | M | Sidamo Re HE Qualific   | 0 | 60  | N | Pass        |
| 556575 | M | North Regi HE Qualific  | 0 | 60  | N | Distinction |
| 556584 | M | Addis Abak HE Qualific  | 0 | 60  | N | Pass        |
| 556660 | F | Somalia Re Lower Thar   | 0 | 60  | N | Fail        |
| 556713 | M | Sidamo Re Lower Thar    | 0 | 120 | N | Withdrawn   |
| 556721 | M | South Regi A Level or I | 0 | 60  | N | Pass        |
| 556739 | F | South Regi A Level or I | 0 | 120 | N | Withdrawn   |
| 556756 | M | Oromia Re Lower Thar    | 0 | 60  | N | Fail        |
| 556774 | M | Somalia Re A Level or I | 0 | 60  | N | Distinction |
| 556780 | M | North Regi Post Gradu   | 0 | 60  | N | Pass        |
| 556785 | F | North Regi Lower Thar   | 0 | 60  | N | Pass        |
| 556835 | M | Addis Abak A Level or I | 0 | 90  | N | Pass        |
| 556918 | M | South Regi A Level or I | 0 | 60  | N | Pass        |
| 556934 | F | Sidamo Re A Level or I  | 0 | 60  | N | Pass        |
| 557005 | M | Sidamo Re Lower Thar    | 0 | 60  | N | Fail        |

|        |   |                          |   |     |   |             |
|--------|---|--------------------------|---|-----|---|-------------|
| 557045 | M | Addis Abat A Level or I  | 0 | 60  | N | Pass        |
| 557083 | F | Amhara Re Lower Tha      | 0 | 180 | Y | Withdrawn   |
| 557237 | M | Afar Region A Level or I | 0 | 60  | Y | Fail        |
| 557247 | F | Sidamo Re A Level or I   | 0 | 60  | Y | Withdrawn   |
| 557358 | M | Sidamo Re Lower Tha      | 0 | 90  | N | Fail        |
| 557432 | M | South Wes Lower Tha      | 0 | 60  | N | Fail        |
| 557467 | F | Sidamo Re A Level or I   | 0 | 60  | N | Withdrawn   |
| 557477 | M | Afar Region A Level or I | 0 | 60  | N | Fail        |
| 557504 | F | Sidamo Re Lower Tha      | 0 | 60  | N | Withdrawn   |
| 557694 | M | Sidamo Re HE Qualific    | 0 | 60  | N | Pass        |
| 557706 | F | Amhara Re HE Qualific    | 0 | 60  | N | Withdrawn   |
| 557742 | F | Somalia Re A Level or I  | 0 | 60  | N | Pass        |
| 557751 | M | Somalia Re A Level or I  | 0 | 60  | N | Withdrawn   |
| 557752 | F | South Regi A Level or I  | 0 | 60  | N | Withdrawn   |
| 557764 | F | Amhara Re A Level or I   | 0 | 60  | N | Fail        |
| 557826 | M | Addis Abat A Level or I  | 0 | 60  | Y | Withdrawn   |
| 557846 | M | Sidamo Re HE Qualific    | 0 | 60  | N | Pass        |
| 557850 | M | South Regi HE Qualific   | 0 | 60  | N | Fail        |
| 557911 | M | North Regi A Level or I  | 0 | 60  | N | Pass        |
| 557924 | M | North Regi A Level or I  | 0 | 60  | N | Pass        |
| 558123 | M | Amhara Re Lower Tha      | 0 | 60  | N | Withdrawn   |
| 558134 | M | South Wes A Level or I   | 0 | 60  | N | Withdrawn   |
| 558153 | M | South Wes A Level or I   | 0 | 60  | N | Fail        |
| 558200 | F | North Regi A Level or I  | 0 | 60  | N | Pass        |
| 558224 | F | Somalia Re A Level or I  | 0 | 60  | N | Fail        |
| 558290 | M | Afar Region A Level or I | 0 | 60  | N | Pass        |
| 558308 | M | Amhara Re Lower Tha      | 0 | 60  | N | Withdrawn   |
| 558317 | M | Sidamo Re Lower Tha      | 0 | 60  | N | Withdrawn   |
| 558415 | F | South Wes A Level or I   | 0 | 60  | Y | Pass        |
| 558440 | F | South Wes Lower Tha      | 0 | 60  | Y | Pass        |
| 558488 | M | Addis Abat A Level or I  | 0 | 60  | N | Fail        |
| 558610 | F | Afar Region Lower Tha    | 0 | 60  | N | Withdrawn   |
| 558626 | M | South Wes Lower Tha      | 0 | 60  | N | Withdrawn   |
| 558645 | F | Sidamo Re A Level or I   | 0 | 60  | N | Fail        |
| 558678 | F | North Regi HE Qualific   | 0 | 60  | N | Pass        |
| 558779 | M | Afar Region HE Qualific  | 0 | 60  | N | Fail        |
| 558787 | M | Sidamo Re HE Qualific    | 0 | 60  | N | Distinction |
| 558806 | M | South Regi A Level or I  | 0 | 60  | N | Pass        |
| 558817 | F | South Regi A Level or I  | 0 | 60  | N | Withdrawn   |
| 558829 | M | Afar Region Lower Tha    | 0 | 60  | N | Fail        |
| 558837 | F | Oromia Re HE Qualific    | 0 | 60  | N | Pass        |
| 558914 | F | Amhara Re A Level or I   | 0 | 60  | N | Fail        |
| 558948 | M | South Wes A Level or I   | 0 | 60  | N | Pass        |
| 558954 | M | Afar Region Lower Tha    | 0 | 120 | N | Withdrawn   |
| 559081 | M | North Regi HE Qualific   | 0 | 60  | N | Pass        |
| 559261 | M | Somalia Re Lower Tha     | 0 | 60  | N | Withdrawn   |
| 559282 | M | South Regi A Level or I  | 0 | 60  | N | Distinction |

|         |   |                         |   |     |   |             |
|---------|---|-------------------------|---|-----|---|-------------|
| 559293  | F | Addis Abat Lower Tha    | 0 | 60  | N | Fail        |
| 559410  | M | South Wes HE Qualific   | 0 | 60  | N | Fail        |
| 559420  | M | North Regi A Level or I | 0 | 60  | N | Pass        |
| 559459  | F | Afar Regio HE Qualific  | 0 | 60  | N | Fail        |
| 559469  | F | North Regi Lower Tha    | 0 | 60  | N | Pass        |
| 559474  | F | South Wes A Level or I  | 0 | 60  | N | Pass        |
| 559612  | M | North Regi HE Qualific  | 0 | 60  | N | Fail        |
| 559672  | M | North Regi A Level or I | 0 | 60  | N | Pass        |
| 559706  | M | Somalia Re Lower Tha    | 0 | 60  | N | Pass        |
| 559823  | M | Amhara Re Lower Tha     | 0 | 60  | N | Fail        |
| 559826  | M | Afar Regio A Level or I | 0 | 60  | N | Fail        |
| 559838  | M | Afar Regio HE Qualific  | 0 | 60  | N | Fail        |
| 559903  | M | Sidamo Re Lower Tha     | 0 | 60  | N | Pass        |
| 559930  | M | South Wes A Level or I  | 0 | 60  | N | Fail        |
| 559950  | M | Amhara Re A Level or I  | 0 | 60  | N | Fail        |
| 560024  | M | Addis Abak A Level or I | 0 | 60  | N | Distinction |
| 560114  | M | Amhara Re A Level or I  | 0 | 60  | Y | Pass        |
| 560127  | F | South Regi A Level or I | 0 | 90  | N | Withdrawn   |
| 560179  | M | North Regi Lower Tha    | 0 | 60  | N | Pass        |
| 560240  | M | Oromia Re HE Qualific   | 0 | 60  | N | Pass        |
| 560260  | F | South Regi HE Qualific  | 0 | 60  | N | Pass        |
| 560311  | M | Addis Abak Lower Tha    | 0 | 60  | N | Pass        |
| 560347  | M | Addis Abak A Level or I | 0 | 60  | N | Pass        |
| 560381  | M | Somalia Re A Level or I | 0 | 60  | N | Pass        |
| 560384  | F | South Wes Lower Tha     | 0 | 60  | N | Withdrawn   |
| 560391  | M | Sidamo Re HE Qualific   | 0 | 60  | N | Pass        |
| 560444  | M | Sidamo Re HE Qualific   | 0 | 90  | N | Pass        |
| 560743  | M | Addis Abak A Level or I | 0 | 60  | N | Withdrawn   |
| 561088  | M | Amhara Re HE Qualific   | 0 | 60  | N | Withdrawn   |
| 561734  | M | North Regi Lower Tha    | 0 | 60  | N | Withdrawn   |
| 561848  | M | Sidamo Re A Level or I  | 0 | 60  | N | Withdrawn   |
| 564465  | M | South Regi A Level or I | 0 | 60  | N | Fail        |
| 596620  | F | Somalia Re Lower Tha    | 0 | 90  | Y | Withdrawn   |
| 879295  | M | Sidamo Re HE Qualific   | 0 | 180 | N | Withdrawn   |
| 907261  | F | Afar Regio HE Qualific  | 0 | 60  | N | Pass        |
| 925553  | M | Sidamo Re HE Qualific   | 0 | 90  | N | Withdrawn   |
| 957467  | M | Afar Regio HE Qualific  | 0 | 90  | N | Pass        |
| 987203  | F | South Wes Lower Tha     | 6 | 130 | N | Withdrawn   |
| 1018685 | M | North Regi Lower Tha    | 0 | 60  | N | Fail        |
| 1044992 | M | Tigrai Regi HE Qualific | 0 | 60  | N | Pass        |
| 1060973 | M | Addis Abak Lower Tha    | 0 | 120 | N | Withdrawn   |
| 1068316 | M | Afar Regio A Level or I | 0 | 75  | N | Pass        |
| 1073372 | M | Sidamo Re A Level or I  | 0 | 90  | N | Withdrawn   |
| 1095916 | M | South Regi A Level or I | 0 | 60  | N | Pass        |
| 1105628 | F | Addis Abak Lower Tha    | 0 | 60  | N | Fail        |
| 1107079 | F | South Wes A Level or I  | 1 | 120 | N | Withdrawn   |
| 1311171 | M | South Regi A Level or I | 0 | 60  | N | Pass        |

|         |   |                          |   |     |   |             |
|---------|---|--------------------------|---|-----|---|-------------|
| 1347447 | M | Addis Abat A Level or I  | 0 | 60  | N | Pass        |
| 1351739 | M | Oromia Re A Level or I   | 1 | 90  | N | Pass        |
| 1384882 | M | Addis Abat HE Qualific   | 1 | 120 | N | Fail        |
| 1392016 | M | Oromia Re Lower Than     | 0 | 60  | N | Fail        |
| 1430804 | M | South Regi Lower Than    | 0 | 120 | N | Withdrawn   |
| 1444134 | F | Somalia Re HE Qualific   | 0 | 60  | N | Pass        |
| 1446954 | F | Somalia Re A Level or I  | 0 | 60  | N | Fail        |
| 1470291 | F | South Wes HE Qualific    | 0 | 60  | N | Pass        |
| 1510198 | F | South Regi A Level or I  | 0 | 70  | Y | Pass        |
| 1534854 | M | South Wes Lower Than     | 0 | 90  | N | Fail        |
| 1577134 | F | Amhara Re A Level or I   | 0 | 60  | N | Fail        |
| 1584449 | M | South Regi Lower Than    | 1 | 270 | Y | Fail        |
| 1587816 | M | Addis Abat A Level or I  | 0 | 120 | N | Fail        |
| 1587817 | M | Addis Abat Lower Than    | 0 | 60  | N | Withdrawn   |
| 1611842 | F | Oromia Re A Level or I   | 0 | 70  | N | Pass        |
| 1620593 | M | Afar Regioi Lower Than   | 1 | 60  | N | Fail        |
| 1622020 | M | Amhara Re HE Qualific    | 0 | 120 | N | Withdrawn   |
| 1626418 | M | Addis Abat Lower Than    | 0 | 60  | N | Pass        |
| 1638119 | M | Tigrai Regi A Level or I | 0 | 60  | N | Fail        |
| 1638425 | F | Afar Regioi HE Qualific  | 0 | 120 | N | Fail        |
| 1640773 | M | Amhara Re A Level or I   | 0 | 60  | N | Distinction |
| 1651198 | F | Sidamo Re HE Qualific    | 1 | 150 | N | Pass        |
| 1656527 | F | Oromia Re Lower Than     | 1 | 120 | N | Withdrawn   |
| 1664920 | M | Amhara Re HE Qualific    | 1 | 90  | N | Pass        |
| 1690836 | M | Afar Regioi A Level or I | 0 | 60  | N | Distinction |
| 1696174 | M | Addis Abat Lower Than    | 1 | 180 | N | Pass        |
| 1719566 | M | Afar Regioi A Level or I | 0 | 60  | N | Pass        |
| 1730611 | F | Addis Abat A Level or I  | 1 | 150 | N | Withdrawn   |
| 1741838 | M | Amhara Re HE Qualific    | 0 | 60  | N | Withdrawn   |
| 1766513 | M | Oromia Re Lower Than     | 0 | 70  | N | Withdrawn   |
| 1819994 | M | South Regi HE Qualific   | 0 | 90  | N | Withdrawn   |
| 1841753 | F | South Wes A Level or I   | 0 | 75  | N | Withdrawn   |
| 1843026 | F | South Regi A Level or I  | 0 | 60  | N | Fail        |
| 1843355 | M | Addis Abat Lower Than    | 0 | 60  | N | Withdrawn   |
| 1845093 | F | Sidamo Re A Level or I   | 1 | 120 | N | Withdrawn   |
| 1879272 | F | Afar Regioi HE Qualific  | 0 | 60  | N | Withdrawn   |
| 1901165 | M | South Regi A Level or I  | 0 | 60  | N | Withdrawn   |
| 1906919 | M | Amhara Re Lower Than     | 0 | 60  | N | Fail        |
| 1913872 | F | South Regi A Level or I  | 0 | 80  | N | Withdrawn   |
| 1922497 | F | Addis Abat A Level or I  | 1 | 120 | N | Withdrawn   |
| 1935774 | M | South Wes A Level or I   | 1 | 120 | N | Withdrawn   |
| 1944130 | M | Sidamo Re A Level or I   | 0 | 70  | N | Pass        |
| 1945240 | M | Somalia Re Lower Than    | 0 | 60  | N | Pass        |
| 1962854 | M | Sidamo Re A Level or I   | 0 | 60  | N | Withdrawn   |
| 1968757 | M | Amhara Re HE Qualific    | 0 | 60  | N | Pass        |
| 1976350 | M | Tigrai Regi A Level or I | 0 | 90  | N | Pass        |
| 1982845 | F | Oromia Re HE Qualific    | 1 | 90  | N | Pass        |

|         |   |                         |   |     |   |             |
|---------|---|-------------------------|---|-----|---|-------------|
| 2002727 | M | Amhara Re A Level or I  | 0 | 60  | N | Withdrawn   |
| 2006894 | M | South Regi Post Gradu   | 0 | 60  | N | Distinction |
| 2020916 | M | North Regi Lower Thar   | 0 | 60  | N | Pass        |
| 2028388 | M | Sidamo Re Lower Thar    | 0 | 90  | N | Pass        |
| 2034000 | F | South Wes Lower Thar    | 0 | 60  | N | Withdrawn   |
| 2036685 | M | Afar Regio HE Qualific  | 1 | 60  | N | Fail        |
| 2037479 | M | Amhara Re Lower Thar    | 0 | 180 | N | Withdrawn   |
| 2046628 | M | South Wes HE Qualific   | 0 | 90  | Y | Withdrawn   |
| 2063578 | M | Afar Regio A Level or I | 0 | 70  | N | Distinction |
| 2080539 | M | Afar Regio Lower Thar   | 0 | 60  | N | Pass        |
| 2082180 | M | Sidamo Re A Level or I  | 1 | 60  | N | Withdrawn   |
| 2088765 | F | South Regi HE Qualific  | 0 | 70  | Y | Pass        |
| 2094546 | M | Addis Abak A Level or I | 0 | 60  | N | Withdrawn   |
| 2126013 | M | Somalia Re Lower Thar   | 0 | 60  | Y | Withdrawn   |
| 2133242 | F | Sidamo Re Lower Thar    | 0 | 60  | N | Withdrawn   |
| 2140311 | M | Afar Regio HE Qualific  | 0 | 160 | N | Pass        |
| 2141506 | F | North Regi A Level or I | 1 | 120 | N | Withdrawn   |
| 2142579 | M | Sidamo Re Lower Thar    | 0 | 60  | N | Fail        |
| 2146936 | F | Amhara Re A Level or I  | 0 | 60  | N | Fail        |
| 2154361 | M | Afar Regio Lower Thar   | 1 | 90  | N | Fail        |
| 2155857 | M | North Regi A Level or I | 0 | 180 | N | Withdrawn   |
| 2156514 | M | South Wes A Level or I  | 0 | 90  | N | Pass        |
| 2177871 | M | Sidamo Re HE Qualific   | 0 | 120 | N | Pass        |
| 2191819 | F | Tigrai Regi HE Qualific | 0 | 90  | N | Withdrawn   |
| 2193231 | M | Somalia Re Lower Thar   | 0 | 60  | N | Fail        |
| 2195445 | F | Amhara Re HE Qualific   | 0 | 60  | Y | Pass        |
| 2209728 | F | South Regi A Level or I | 1 | 60  | N | Pass        |
| 2214589 | M | South Regi Lower Thar   | 1 | 240 | N | Withdrawn   |
| 2227786 | M | Sidamo Re HE Qualific   | 1 | 130 | N | Fail        |
| 2228206 | M | South Regi A Level or I | 1 | 180 | N | Withdrawn   |
| 2229785 | M | South Regi HE Qualific  | 0 | 90  | N | Withdrawn   |
| 2231961 | M | Sidamo Re HE Qualific   | 1 | 60  | N | Distinction |
| 2232218 | M | South Regi A Level or I | 0 | 150 | N | Withdrawn   |
| 2238679 | M | Amhara Re HE Qualific   | 1 | 60  | N | Fail        |
| 2248715 | M | South Wes HE Qualific   | 1 | 90  | N | Pass        |
| 2267712 | F | Amhara Re Lower Thar    | 0 | 60  | N | Fail        |
| 2279449 | M | South Wes A Level or I  | 0 | 60  | N | Pass        |
| 2281292 | M | Afar Regio A Level or I | 0 | 60  | N | Pass        |
| 2283212 | F | Afar Regio Lower Thar   | 1 | 60  | N | Withdrawn   |
| 2298696 | M | Amhara Re Lower Thar    | 0 | 60  | N | Withdrawn   |
| 2318590 | F | Addis Abak HE Qualific  | 0 | 60  | N | Withdrawn   |
| 2321898 | M | Addis Abak Lower Thar   | 0 | 60  | N | Fail        |
| 2330534 | F | Oromia Re Lower Thar    | 0 | 60  | N | Fail        |
| 2332060 | M | Addis Abak Lower Thar   | 0 | 60  | Y | Pass        |
| 2338290 | M | Addis Abak A Level or I | 2 | 120 | N | Withdrawn   |
| 2348111 | F | South Regi A Level or I | 0 | 60  | N | Pass        |
| 2350300 | F | South Regi A Level or I | 1 | 120 | Y | Fail        |



|         |   |                          |   |     |   |             |
|---------|---|--------------------------|---|-----|---|-------------|
| 2353766 | F | Amhara Re HE Qualific    | 0 | 60  | N | Withdrawn   |
| 2358423 | F | Oromia Re A Level or I   | 1 | 120 | Y | Pass        |
| 2374051 | F | South Regi A Level or I  | 3 | 120 | N | Fail        |
| 2374404 | M | South Wes Post Gradu     | 0 | 60  | N | Pass        |
| 2375123 | M | Amhara Re HE Qualific    | 0 | 60  | N | Withdrawn   |
| 2375627 | M | Tigrai Regi A Level or I | 0 | 60  | Y | Withdrawn   |
| 2377623 | F | Somalia Re HE Qualific   | 0 | 80  | N | Pass        |
| 2381845 | F | Amhara Re Lower Thar     | 1 | 160 | N | Fail        |
| 2388623 | F | South Regi A Level or I  | 0 | 60  | Y | Pass        |
| 2400764 | F | Afar Regio HE Qualific   | 0 | 60  | N | Fail        |
| 2406709 | M | Afar Regio HE Qualific   | 0 | 60  | N | Distinction |
| 2418045 | M | South Wes A Level or I   | 1 | 120 | N | Pass        |
| 2418580 | M | Amhara Re Lower Thar     | 0 | 60  | N | Pass        |
| 2421609 | M | Addis Abak Lower Thar    | 1 | 60  | N | Fail        |
| 2435965 | M | Amhara Re A Level or I   | 2 | 120 | Y | Withdrawn   |
| 2444632 | M | Amhara Re HE Qualific    | 0 | 60  | N | Pass        |
| 2451672 | M | South Regi HE Qualific   | 0 | 60  | N | Fail        |
| 2454933 | F | Amhara Re HE Qualific    | 2 | 150 | N | Fail        |
| 2456387 | M | Addis Abak A Level or I  | 2 | 130 | N | Withdrawn   |
| 2456612 | M | Sidamo Re HE Qualific    | 1 | 60  | N | Pass        |
| 2459878 | M | Somalia Re A Level or I  | 0 | 60  | N | Pass        |
| 2460752 | F | South Regi A Level or I  | 0 | 60  | N | Pass        |
| 2465876 | F | Tigrai Regi A Level or I | 0 | 60  | N | Pass        |
| 2476998 | F | Sidamo Re Lower Thar     | 0 | 60  | N | Pass        |
| 2479086 | F | Afar Regio Lower Thar    | 0 | 60  | N | Withdrawn   |
| 2480562 | F | North Regi Lower Thar    | 1 | 315 | N | Withdrawn   |
| 2498388 | F | North Regi Lower Thar    | 0 | 60  | Y | Pass        |
| 2499307 | M | Addis Abak A Level or I  | 0 | 60  | N | Fail        |
| 2501479 | M | Afar Regio HE Qualific   | 0 | 60  | N | Fail        |
| 2501768 | F | Somalia Re Lower Thar    | 1 | 120 | N | Pass        |
| 2502504 | F | Oromia Re A Level or I   | 0 | 60  | N | Pass        |
| 2502707 | M | Sidamo Re A Level or I   | 0 | 90  | N | Withdrawn   |
| 2505501 | M | Somalia Re HE Qualific   | 0 | 180 | N | Pass        |
| 2508785 | F | South Regi Lower Thar    | 3 | 130 | N | Fail        |
| 2513245 | M | Amhara Re Lower Thar     | 0 | 120 | N | Pass        |
| 2517826 | F | Sidamo Re HE Qualific    | 0 | 120 | N | Withdrawn   |
| 2518617 | M | Addis Abak Lower Thar    | 0 | 60  | N | Fail        |
| 2523146 | M | Somalia Re A Level or I  | 0 | 60  | N | Withdrawn   |
| 2526483 | M | Afar Regio Lower Thar    | 0 | 60  | Y | Fail        |
| 2531298 | F | Amhara Re A Level or I   | 0 | 120 | N | Fail        |
| 2532322 | M | South Regi A Level or I  | 0 | 90  | Y | Pass        |
| 2535493 | M | North Regi A Level or I  | 0 | 100 | N | Withdrawn   |
| 2536214 | F | South Wes Lower Thar     | 1 | 120 | Y | Fail        |
| 2537695 | M | Sidamo Re HE Qualific    | 0 | 60  | N | Distinction |
| 2540922 | M | Amhara Re A Level or I   | 3 | 120 | N | Pass        |
| 2543267 | M | South Regi Lower Thar    | 0 | 60  | N | Fail        |
| 2543600 | M | Amhara Re Lower Thar     | 1 | 120 | Y | Pass        |

|         |   |                          |   |     |   |             |
|---------|---|--------------------------|---|-----|---|-------------|
| 2545113 | M | Amhara Re A Level or I   | 1 | 60  | N | Withdrawn   |
| 2546792 | M | Amhara Re Lower Than     | 0 | 60  | N | Withdrawn   |
| 2547321 | F | Sidamo Re Lower Than     | 0 | 60  | N | Pass        |
| 2547402 | M | Oromia Re Lower Than     | 2 | 180 | Y | Pass        |
| 2549875 | M | South Wes Post Gradu     | 1 | 120 | N | Pass        |
| 2549939 | F | Afar Region HE Qualific  | 0 | 60  | N | Pass        |
| 2554973 | M | South Regi Lower Than    | 0 | 60  | N | Withdrawn   |
| 2571497 | F | Addis Abak Lower Than    | 0 | 120 | N | Pass        |
| 2581822 | M | South Regi HE Qualific   | 0 | 120 | N | Withdrawn   |
| 2585285 | F | Amhara Re A Level or I   | 0 | 60  | N | Pass        |
| 2586026 | M | South Wes Lower Than     | 1 | 60  | N | Fail        |
| 2594888 | F | Addis Abak A Level or I  | 1 | 200 | Y | Pass        |
| 2602486 | F | South Regi A Level or I  | 0 | 60  | N | Pass        |
| 2604660 | F | South Regi Lower Than    | 1 | 120 | N | Withdrawn   |
| 2604698 | F | Somalia Re A Level or I  | 4 | 300 | Y | Withdrawn   |
| 2607945 | F | Somalia Re A Level or I  | 0 | 120 | N | Withdrawn   |
| 2611779 | M | Sidamo Re A Level or I   | 0 | 60  | N | Fail        |
| 2614272 | F | Tigrai Regi HE Qualific  | 0 | 60  | N | Withdrawn   |
| 2615892 | M | South Regi A Level or I  | 0 | 110 | N | Pass        |
| 2621590 | M | Addis Abak A Level or I  | 0 | 60  | N | Fail        |
| 2624569 | F | South Regi HE Qualific   | 1 | 60  | N | Withdrawn   |
| 2624720 | F | South Wes Lower Than     | 0 | 60  | Y | Fail        |
| 2626179 | M | Somalia Re Lower Than    | 0 | 60  | N | Pass        |
| 2628025 | M | Addis Abak Lower Than    | 0 | 60  | N | Fail        |
| 2629511 | F | Tigrai Regi Lower Than   | 0 | 120 | N | Withdrawn   |
| 2632491 | M | Tigrai Regi A Level or I | 0 | 60  | N | Fail        |
| 2633235 | F | North Regi A Level or I  | 0 | 60  | N | Pass        |
| 2636225 | M | South Regi A Level or I  | 0 | 60  | N | Pass        |
| 2636885 | F | Sidamo Re A Level or I   | 1 | 120 | N | Withdrawn   |
| 2639451 | F | Addis Abak A Level or I  | 2 | 180 | Y | Distinction |
| 2640063 | M | South Regi Lower Than    | 0 | 120 | N | Fail        |
| 2640992 | M | South Regi A Level or I  | 1 | 150 | N | Fail        |
| 2642830 | F | Afar Region A Level or I | 0 | 120 | N | Pass        |
| 2643034 | F | South Regi Lower Than    | 1 | 60  | N | Withdrawn   |
| 2643777 | M | South Regi Lower Than    | 5 | 60  | N | Fail        |
| 2647226 | F | South Wes HE Qualific    | 0 | 60  | N | Pass        |
| 2648271 | M | Afar Region A Level or I | 0 | 60  | N | Withdrawn   |
| 2652066 | M | Somalia Re Lower Than    | 1 | 60  | N | Withdrawn   |
| 2655683 | M | South Regi No Formal     | 0 | 60  | N | Fail        |
| 2656282 | F | Afar Region A Level or I | 0 | 90  | N | Withdrawn   |
| 2659756 | M | Addis Abak A Level or I  | 0 | 60  | N | Fail        |
| 2661870 | M | Addis Abak A Level or I  | 0 | 180 | N | Pass        |
| 2665767 | M | South Wes A Level or I   | 2 | 120 | N | Withdrawn   |
| 2666577 | F | South Wes Lower Than     | 1 | 60  | Y | Pass        |
| 2667605 | M | Somalia Re HE Qualific   | 2 | 280 | N | Withdrawn   |
| 2669206 | M | South Wes A Level or I   | 2 | 90  | N | Pass        |
| 2672686 | M | Sidamo Re HE Qualific    | 0 | 60  | N | Distinction |

|         |   |                            |   |     |   |             |
|---------|---|----------------------------|---|-----|---|-------------|
| 2677955 | F | South Regi A Level or I    | 0 | 70  | N | Pass        |
| 2678338 | F | Addis Abak No Formal       | 1 | 120 | N | Fail        |
| 2683836 | M | Addis Abak Lower Than      | 0 | 60  | N | Pass        |
| 2685825 | M | Sidamo Re Lower Than       | 0 | 60  | Y | Fail        |
| 2686609 | M | South Wes A Level or I     | 1 | 180 | Y | Withdrawn   |
| 2689536 | M | Afar Region HE Qualific    | 0 | 120 | Y | Pass        |
| 2691780 | F | Addis Abak A Level or I    | 0 | 120 | N | Withdrawn   |
| 2692101 | M | Tigrai Region Lower Than   | 0 | 90  | N | Withdrawn   |
| 2693243 | F | Sidamo Re Lower Than       | 0 | 60  | N | Distinction |
| 2694933 | F | Somalia Re A Level or I    | 0 | 60  | Y | Pass        |
| 2697773 | F | Addis Abak A Level or I    | 0 | 60  | N | Fail        |
| 2707979 | F | Somalia Re Lower Than      | 0 | 120 | N | Fail        |
| 2710343 | M | Amhara Re Lower Than       | 0 | 60  | N | Fail        |
| 3733    | M | South Regi HE Qualific     | 0 | 60  | N | Withdrawn   |
| 8462    | M | Sidamo Re HE Qualific      | 0 | 90  | N | Withdrawn   |
| 27417   | M | South Wes Lower Than       | 0 | 60  | N | Withdrawn   |
| 27935   | F | Addis Abak Lower Than      | 0 | 60  | Y | Fail        |
| 28046   | F | Sidamo Re HE Qualific      | 0 | 70  | N | Fail        |
| 29411   | M | Somalia Re A Level or I    | 0 | 60  | N | Pass        |
| 30549   | M | Oromia Re A Level or I     | 2 | 60  | N | Fail        |
| 31173   | M | Amhara Re A Level or I     | 1 | 60  | N | Fail        |
| 31269   | F | Somalia Re A Level or I    | 0 | 120 | N | Withdrawn   |
| 33387   | M | Afar Region HE Qualific    | 1 | 120 | N | Withdrawn   |
| 33681   | M | Oromia Re A Level or I     | 2 | 60  | Y | Withdrawn   |
| 33897   | M | South Regi Lower Than      | 0 | 60  | N | Withdrawn   |
| 33930   | F | South Wes A Level or I     | 0 | 90  | N | Pass        |
| 34087   | M | Oromia Re A Level or I     | 0 | 60  | Y | Withdrawn   |
| 34653   | M | Somalia Re Lower Than      | 0 | 60  | N | Fail        |
| 35859   | M | Amhara Re A Level or I     | 0 | 60  | N | Fail        |
| 39411   | F | South Regi Lower Than      | 0 | 60  | N | Fail        |
| 39427   | F | South Regi A Level or I    | 0 | 60  | N | Withdrawn   |
| 40184   | M | Tigrai Region HE Qualific  | 0 | 60  | N | Distinction |
| 40419   | M | Somalia Re Lower Than      | 1 | 60  | N | Pass        |
| 40563   | F | Oromia Re A Level or I     | 0 | 60  | N | Pass        |
| 42818   | F | Addis Abak Lower Than      | 0 | 180 | Y | Fail        |
| 46633   | F | Sidamo Re A Level or I     | 0 | 60  | N | Withdrawn   |
| 47063   | M | Sidamo Re HE Qualific      | 0 | 120 | N | Withdrawn   |
| 48152   | F | Addis Abak A Level or I    | 0 | 120 | N | Pass        |
| 49530   | M | Addis Abak A Level or I    | 1 | 60  | N | Withdrawn   |
| 50610   | F | Addis Abak A Level or I    | 1 | 70  | Y | Fail        |
| 51163   | M | Sidamo Re HE Qualific      | 0 | 60  | N | Pass        |
| 52494   | F | South Regi Lower Than      | 0 | 240 | N | Withdrawn   |
| 57227   | F | Amhara Re Lower Than       | 1 | 160 | N | Pass        |
| 57818   | M | Tigrai Region A Level or I | 0 | 60  | N | Pass        |
| 59275   | M | Afar Region HE Qualific    | 0 | 60  | N | Fail        |
| 59370   | M | South Wes A Level or I     | 0 | 180 | N | Pass        |
| 63566   | M | Oromia Re HE Qualific      | 0 | 120 | N | Fail        |

|        |   |                   |                   |   |     |   |             |
|--------|---|-------------------|-------------------|---|-----|---|-------------|
| 63856  | M | Afar Region       | A Level or Higher | 1 | 60  | N | Pass        |
| 66047  | F | Amhara Region     | HE Qualification  | 4 | 90  | Y | Withdrawn   |
| 66577  | F | Amhara Region     | HE Qualification  | 1 | 60  | N | Fail        |
| 67471  | F | Sidamo Region     | Lower Than HE     | 2 | 60  | N | Pass        |
| 67505  | F | North Region      | A Level or Higher | 1 | 60  | N | Fail        |
| 68011  | M | Sidamo Region     | A Level or Higher | 0 | 180 | N | Withdrawn   |
| 68376  | M | Sidamo Region     | HE Qualification  | 0 | 60  | N | Pass        |
| 69489  | M | South West Region | Lower Than HE     | 1 | 150 | N | Withdrawn   |
| 71209  | M | Oromia Region     | Lower Than HE     | 0 | 60  | N | Pass        |
| 74130  | M | South Region      | A Level or Higher | 1 | 60  | N | Withdrawn   |
| 74502  | F | Tigray Region     | Lower Than HE     | 0 | 120 | N | Pass        |
| 77241  | M | South Region      | Lower Than HE     | 0 | 60  | N | Withdrawn   |
| 78170  | F | South Region      | Lower Than HE     | 0 | 60  | N | Fail        |
| 80329  | M | South Region      | Lower Than HE     | 1 | 120 | N | Withdrawn   |
| 80868  | M | South West Region | Lower Than HE     | 0 | 60  | N | Pass        |
| 82088  | F | Somalia Region    | HE Qualification  | 2 | 60  | N | Fail        |
| 83588  | M | South West Region | HE Qualification  | 2 | 60  | N | Fail        |
| 84605  | M | North Region      | A Level or Higher | 0 | 120 | N | Withdrawn   |
| 85325  | F | South Region      | Lower Than HE     | 0 | 120 | N | Withdrawn   |
| 89188  | F | South Region      | A Level or Higher | 0 | 60  | Y | Pass        |
| 89727  | F | Tigray Region     | A Level or Higher | 0 | 70  | N | Fail        |
| 90979  | F | Addis Ababa       | HE Qualification  | 0 | 120 | N | Fail        |
| 91354  | M | South West Region | A Level or Higher | 1 | 60  | Y | Withdrawn   |
| 92166  | M | Oromia Region     | HE Qualification  | 3 | 60  | N | Withdrawn   |
| 92312  | M | Tigray Region     | Lower Than HE     | 3 | 60  | N | Fail        |
| 92391  | F | Addis Ababa       | A Level or Higher | 1 | 60  | N | Fail        |
| 102850 | F | South West Region | A Level or Higher | 0 | 165 | N | Pass        |
| 103800 | M | Tigray Region     | A Level or Higher | 0 | 90  | N | Pass        |
| 104643 | F | South West Region | A Level or Higher | 0 | 60  | N | Pass        |
| 104772 | M | South West Region | A Level or Higher | 0 | 60  | N | Withdrawn   |
| 105523 | M | Afar Region       | HE Qualification  | 0 | 90  | N | Pass        |
| 108275 | F | Addis Ababa       | A Level or Higher | 1 | 120 | Y | Withdrawn   |
| 108789 | M | Sidamo Region     | A Level or Higher | 0 | 70  | Y | Fail        |
| 111360 | M | South Region      | HE Qualification  | 3 | 60  | N | Fail        |
| 111548 | F | South West Region | A Level or Higher | 1 | 120 | N | Withdrawn   |
| 111926 | M | Addis Ababa       | Lower Than HE     | 1 | 60  | N | Fail        |
| 114558 | M | North Region      | Lower Than HE     | 0 | 60  | N | Pass        |
| 118887 | F | Sidamo Region     | Lower Than HE     | 0 | 120 | N | Withdrawn   |
| 120999 | M | Addis Ababa       | Lower Than HE     | 1 | 60  | N | Pass        |
| 122739 | M | Sidamo Region     | A Level or Higher | 0 | 60  | N | Fail        |
| 123497 | M | Addis Ababa       | A Level or Higher | 1 | 60  | N | Fail        |
| 123598 | M | Afar Region       | A Level or Higher | 0 | 90  | Y | Distinction |
| 123957 | F | Amhara Region     | Lower Than HE     | 0 | 120 | N | Withdrawn   |
| 124006 | F | Afar Region       | A Level or Higher | 1 | 70  | Y | Pass        |
| 124387 | M | Afar Region       | Post Graduate     | 0 | 60  | N | Withdrawn   |
| 126394 | M | Tigray Region     | A Level or Higher | 0 | 120 | N | Pass        |
| 126812 | F | Somalia Region    | A Level or Higher | 0 | 120 | N | Pass        |

|        |   |                          |   |     |   |             |
|--------|---|--------------------------|---|-----|---|-------------|
| 127988 | M | Sidamo Re A Level or I   | 0 | 150 | N | Pass        |
| 128656 | F | North Regi A Level or I  | 0 | 60  | N | Pass        |
| 128965 | M | South Wes A Level or I   | 1 | 60  | N | Pass        |
| 130467 | M | South Regi A Level or I  | 0 | 60  | N | Pass        |
| 130671 | F | South Regi Lower Than    | 0 | 60  | N | Pass        |
| 130837 | M | Afar Regioi A Level or I | 0 | 60  | Y | Fail        |
| 131222 | M | South Regi A Level or I  | 0 | 60  | N | Pass        |
| 132401 | M | Sidamo Re Lower Than     | 0 | 60  | N | Fail        |
| 135385 | F | Addis Abak A Level or I  | 0 | 60  | N | Pass        |
| 138709 | M | North Regi Lower Than    | 1 | 60  | Y | Withdrawn   |
| 138715 | M | Oromia Re A Level or I   | 0 | 60  | N | Withdrawn   |
| 139843 | M | Amhara Re HE Qualific    | 2 | 60  | N | Fail        |
| 140807 | F | Addis Abak A Level or I  | 0 | 60  | Y | Pass        |
| 141301 | M | South Regi Lower Than    | 2 | 150 | N | Withdrawn   |
| 142998 | F | Amhara Re HE Qualific    | 1 | 120 | Y | Withdrawn   |
| 144895 | M | Addis Abak A Level or I  | 0 | 60  | N | Pass        |
| 146485 | M | North Regi Lower Than    | 0 | 90  | N | Fail        |
| 146666 | F | Addis Abak HE Qualific   | 0 | 120 | N | Fail        |
| 148008 | M | Amhara Re A Level or I   | 2 | 60  | N | Fail        |
| 148515 | F | Afar Regioi Lower Than   | 1 | 60  | N | Fail        |
| 156783 | M | Sidamo Re Lower Than     | 0 | 60  | N | Pass        |
| 157310 | F | Sidamo Re Lower Than     | 0 | 210 | N | Pass        |
| 158611 | M | Somalia Re HE Qualific   | 1 | 60  | N | Pass        |
| 160178 | M | Addis Abak A Level or I  | 0 | 60  | N | Withdrawn   |
| 162337 | F | South Regi Lower Than    | 0 | 120 | N | Fail        |
| 164935 | M | Amhara Re HE Qualific    | 0 | 60  | N | Pass        |
| 165178 | F | South Regi A Level or I  | 0 | 120 | N | Withdrawn   |
| 169079 | M | South Regi A Level or I  | 0 | 120 | N | Distinction |
| 169700 | M | Amhara Re No Formal      | 0 | 60  | N | Fail        |
| 172965 | M | Afar Regioi Post Gradu   | 0 | 150 | N | Withdrawn   |
| 173004 | F | South Wes HE Qualific    | 1 | 90  | N | Fail        |
| 173370 | M | South Regi Lower Than    | 0 | 60  | N | Pass        |
| 177354 | F | Tigrai Regio Lower Than  | 1 | 90  | N | Pass        |
| 178020 | F | Sidamo Re No Formal      | 0 | 120 | N | Pass        |
| 179718 | F | Oromia Re HE Qualific    | 2 | 150 | Y | Fail        |
| 179904 | M | Amhara Re A Level or I   | 0 | 90  | N | Fail        |
| 180651 | M | Sidamo Re Lower Than     | 0 | 60  | N | Pass        |
| 184025 | F | North Regi Lower Than    | 0 | 120 | N | Fail        |
| 185024 | F | South Regi Lower Than    | 0 | 180 | Y | Withdrawn   |
| 185127 | M | Sidamo Re A Level or I   | 1 | 60  | N | Pass        |
| 188875 | M | Sidamo Re HE Qualific    | 0 | 60  | N | Fail        |
| 189624 | M | South Regi A Level or I  | 0 | 150 | N | Pass        |
| 191445 | M | South Regi Lower Than    | 0 | 60  | N | Fail        |
| 198953 | F | Tigrai Regio Lower Than  | 2 | 180 | N | Withdrawn   |
| 202489 | M | Sidamo Re Lower Than     | 0 | 60  | N | Withdrawn   |
| 203066 | F | North Regi A Level or I  | 0 | 60  | N | Pass        |
| 204182 | M | South Wes A Level or I   | 1 | 60  | N | Pass        |

|        |   |                         |   |     |   |           |
|--------|---|-------------------------|---|-----|---|-----------|
| 204505 | M | Amhara Re HE Qualific   | 0 | 60  | N | Pass      |
| 205417 | M | South Regi Lower Tha    | 0 | 60  | N | Withdrawn |
| 205442 | M | South Wes HE Qualific   | 0 | 60  | N | Pass      |
| 227020 | M | Amhara Re A Level or I  | 0 | 60  | N | Fail      |
| 227167 | F | Oromia Re A Level or I  | 0 | 60  | N | Withdrawn |
| 227491 | F | South Regi A Level or I | 1 | 150 | N | Withdrawn |
| 228695 | M | Somalia Re A Level or I | 0 | 120 | N | Withdrawn |
| 228888 | F | South Regi A Level or I | 0 | 90  | N | Pass      |
| 230510 | M | South Regi Lower Tha    | 0 | 60  | Y | Fail      |
| 231572 | M | South Wes A Level or I  | 0 | 120 | N | Pass      |
| 232078 | M | Sidamo Re HE Qualific   | 0 | 60  | N | Withdrawn |
| 234406 | F | Afar Regio HE Qualific  | 0 | 75  | N | Pass      |
| 234827 | M | South Regi Lower Tha    | 0 | 120 | Y | Withdrawn |
| 235777 | M | Sidamo Re A Level or I  | 2 | 60  | N | Withdrawn |
| 236150 | F | Tigrai Regi HE Qualific | 0 | 120 | N | Withdrawn |
| 236857 | M | Amhara Re Lower Tha     | 0 | 120 | N | Pass      |
| 236953 | F | Oromia Re A Level or I  | 2 | 60  | N | Pass      |
| 237418 | F | Sidamo Re A Level or I  | 0 | 90  | Y | Withdrawn |
| 237506 | M | Amhara Re Lower Tha     | 0 | 60  | N | Fail      |
| 237602 | F | Oromia Re Lower Tha     | 1 | 60  | N | Pass      |
| 237808 | M | Addis Abak Lower Tha    | 0 | 60  | N | Fail      |
| 238800 | M | Somalia Re A Level or I | 0 | 60  | N | Fail      |
| 238983 | F | South Regi A Level or I | 2 | 90  | Y | Pass      |
| 240641 | F | North Regi A Level or I | 0 | 60  | N | Pass      |
| 242472 | M | South Regi Lower Tha    | 0 | 60  | N | Fail      |
| 243372 | M | South Wes A Level or I  | 0 | 75  | N | Pass      |
| 244738 | M | Sidamo Re A Level or I  | 0 | 60  | N | Pass      |
| 245653 | F | Afar Regio HE Qualific  | 0 | 60  | N | Fail      |
| 245946 | M | Tigrai Regi HE Qualific | 0 | 90  | N | Pass      |
| 248252 | F | Sidamo Re HE Qualific   | 0 | 90  | N | Withdrawn |
| 248695 | F | Amhara Re A Level or I  | 0 | 60  | N | Fail      |
| 248961 | M | South Regi A Level or I | 0 | 120 | N | Pass      |
| 249704 | M | Amhara Re A Level or I  | 1 | 180 | N | Withdrawn |
| 250163 | F | Addis Abak A Level or I | 0 | 60  | N | Pass      |
| 250456 | F | Addis Abak A Level or I | 0 | 150 | N | Withdrawn |
| 250644 | F | Afar Regio HE Qualific  | 0 | 90  | N | Withdrawn |
| 253579 | M | North Regi A Level or I | 0 | 120 | N | Withdrawn |
| 255622 | F | South Regi HE Qualific  | 0 | 180 | N | Fail      |
| 257167 | M | South Regi Lower Tha    | 0 | 120 | N | Pass      |
| 257359 | F | South Regi Lower Tha    | 0 | 120 | N | Withdrawn |
| 258010 | M | South Regi Lower Tha    | 1 | 120 | N | Pass      |
| 258042 | F | Oromia Re HE Qualific   | 0 | 90  | N | Pass      |
| 259060 | F | North Regi Lower Tha    | 0 | 60  | N | Pass      |
| 259641 | M | North Regi A Level or I | 0 | 60  | N | Pass      |
| 259951 | F | South Regi A Level or I | 0 | 60  | N | Pass      |
| 261495 | F | South Wes A Level or I  | 0 | 90  | Y | Withdrawn |
| 263524 | F | Afar Regio Lower Tha    | 1 | 60  | N | Fail      |

|        |   |                          |   |     |   |             |
|--------|---|--------------------------|---|-----|---|-------------|
| 266286 | F | South Wes HE Qualific    | 0 | 60  | N | Pass        |
| 266558 | M | Sidamo Re A Level or I   | 0 | 90  | Y | Pass        |
| 267871 | M | Sidamo Re A Level or I   | 2 | 120 | N | Pass        |
| 268817 | F | Amhara Re Lower Thar     | 0 | 90  | Y | Withdrawn   |
| 269065 | M | South Regi A Level or I  | 0 | 90  | Y | Withdrawn   |
| 270393 | F | Addis Abak Lower Thar    | 1 | 60  | N | Pass        |
| 270493 | F | South Regi Lower Thar    | 0 | 60  | N | Fail        |
| 271206 | M | North Regi HE Qualific   | 0 | 60  | N | Fail        |
| 271526 | M | South Regi HE Qualific   | 2 | 60  | N | Pass        |
| 273106 | M | Somalia Re Lower Thar    | 1 | 60  | N | Fail        |
| 274712 | M | Sidamo Re HE Qualific    | 2 | 60  | N | Fail        |
| 274964 | M | Somalia Re Lower Thar    | 0 | 120 | N | Fail        |
| 275232 | F | Tigrai Regi A Level or I | 0 | 60  | N | Pass        |
| 276857 | F | Tigrai Regi HE Qualific  | 0 | 60  | N | Pass        |
| 277412 | M | Tigrai Regi A Level or I | 0 | 120 | N | Fail        |
| 277596 | M | South Regi Lower Thar    | 0 | 60  | N | Pass        |
| 277729 | M | South Wes A Level or I   | 0 | 90  | N | Fail        |
| 279868 | F | Sidamo Re HE Qualific    | 0 | 120 | N | Pass        |
| 279883 | M | Somalia Re A Level or I  | 1 | 150 | N | Withdrawn   |
| 280541 | F | Somalia Re A Level or I  | 0 | 60  | N | Withdrawn   |
| 281656 | M | North Regi Lower Thar    | 1 | 210 | Y | Withdrawn   |
| 282317 | F | Somalia Re A Level or I  | 0 | 60  | Y | Pass        |
| 283401 | F | Addis Abak A Level or I  | 0 | 120 | N | Withdrawn   |
| 283535 | M | Sidamo Re A Level or I   | 0 | 60  | N | Withdrawn   |
| 284540 | F | Oromia Re Lower Thar     | 0 | 120 | N | Withdrawn   |
| 285085 | M | Oromia Re Lower Thar     | 0 | 60  | N | Withdrawn   |
| 285557 | M | Afar Regioi A Level or I | 0 | 60  | N | Pass        |
| 286449 | F | Somalia Re Lower Thar    | 5 | 120 | N | Withdrawn   |
| 286842 | F | Addis Abak A Level or I  | 0 | 60  | N | Pass        |
| 287783 | F | Tigrai Regi HE Qualific  | 1 | 90  | N | Distinction |
| 289009 | M | Sidamo Re HE Qualific    | 0 | 150 | N | Pass        |
| 289529 | M | Addis Abak A Level or I  | 0 | 120 | N | Withdrawn   |
| 290371 | F | Sidamo Re A Level or I   | 0 | 90  | N | Withdrawn   |
| 292694 | F | Sidamo Re A Level or I   | 1 | 180 | N | Fail        |
| 293853 | F | Addis Abak A Level or I  | 0 | 60  | N | Pass        |
| 294364 | M | South Regi Lower Thar    | 0 | 60  | N | Fail        |
| 296813 | M | Amhara Re Lower Thar     | 0 | 60  | N | Withdrawn   |
| 296849 | F | Amhara Re A Level or I   | 0 | 90  | N | Withdrawn   |
| 297382 | M | Sidamo Re HE Qualific    | 0 | 120 | N | Withdrawn   |
| 298402 | M | South Regi Lower Thar    | 0 | 120 | N | Pass        |
| 298911 | F | Afar Regioi Lower Thar   | 0 | 70  | N | Withdrawn   |
| 299473 | M | Somalia Re Lower Thar    | 2 | 60  | Y | Fail        |
| 303582 | F | Amhara Re A Level or I   | 0 | 105 | N | Pass        |
| 305535 | M | South Regi A Level or I  | 2 | 180 | N | Pass        |
| 305702 | F | Sidamo Re A Level or I   | 1 | 120 | N | Withdrawn   |
| 307932 | M | Afar Regioi HE Qualific  | 1 | 120 | N | Fail        |
| 308231 | M | Amhara Re Lower Thar     | 0 | 60  | N | Fail        |

|        |   |                          |   |     |   |             |
|--------|---|--------------------------|---|-----|---|-------------|
| 308707 | F | South Wes Lower Thar     | 1 | 120 | N | Withdrawn   |
| 308982 | M | Amhara Re HE Qualific    | 1 | 60  | N | Withdrawn   |
| 309258 | M | South Wes HE Qualific    | 1 | 120 | N | Withdrawn   |
| 311117 | M | Afar Regioi A Level or I | 1 | 60  | Y | Withdrawn   |
| 311474 | M | South Wes Lower Thar     | 0 | 90  | N | Withdrawn   |
| 311877 | F | South Wes Lower Thar     | 0 | 90  | N | Withdrawn   |
| 314123 | F | North Regi A Level or I  | 1 | 60  | N | Withdrawn   |
| 314219 | M | Oromia Re Lower Thar     | 0 | 120 | N | Withdrawn   |
| 314956 | M | Oromia Re A Level or I   | 1 | 60  | N | Pass        |
| 315082 | M | South Regi A Level or I  | 0 | 60  | N | Fail        |
| 315388 | M | Oromia Re A Level or I   | 1 | 60  | Y | Withdrawn   |
| 315517 | F | Sidamo Re Lower Thar     | 0 | 180 | Y | Withdrawn   |
| 315625 | M | Oromia Re A Level or I   | 1 | 60  | N | Pass        |
| 315730 | M | South Wes A Level or I   | 0 | 60  | N | Pass        |
| 315909 | F | Addis Abak Lower Thar    | 0 | 60  | N | Fail        |
| 317096 | F | Sidamo Re A Level or I   | 0 | 90  | N | Pass        |
| 318574 | M | Amhara Re A Level or I   | 0 | 90  | N | Withdrawn   |
| 318794 | F | Amhara Re Lower Thar     | 0 | 150 | N | Pass        |
| 318977 | M | South Wes Lower Thar     | 0 | 60  | N | Fail        |
| 319479 | F | Afar Regioi HE Qualific  | 0 | 60  | N | Withdrawn   |
| 320963 | M | South Wes A Level or I   | 0 | 60  | N | Pass        |
| 325497 | F | South Wes A Level or I   | 0 | 90  | N | Fail        |
| 328173 | F | Afar Regioi Lower Thar   | 0 | 90  | N | Withdrawn   |
| 331315 | M | Somalia Re A Level or I  | 1 | 130 | N | Pass        |
| 331404 | F | North Regi HE Qualific   | 0 | 60  | N | Pass        |
| 332309 | M | Amhara Re A Level or I   | 0 | 60  | N | Pass        |
| 332436 | M | South Regi Lower Thar    | 0 | 60  | N | Pass        |
| 332726 | F | Oromia Re Lower Thar     | 0 | 60  | N | Fail        |
| 333155 | M | Amhara Re Lower Thar     | 0 | 120 | N | Fail        |
| 334255 | F | Afar Regioi HE Qualific  | 0 | 60  | Y | Pass        |
| 334257 | M | North Regi Lower Thar    | 0 | 60  | N | Pass        |
| 335018 | F | Sidamo Re Lower Thar     | 1 | 100 | N | Withdrawn   |
| 335405 | M | Addis Abak A Level or I  | 0 | 60  | N | Distinction |
| 335910 | F | Oromia Re A Level or I   | 0 | 60  | N | Withdrawn   |
| 336037 | M | North Regi Post Gradu    | 1 | 60  | N | Pass        |
| 337314 | M | Sidamo Re A Level or I   | 1 | 60  | N | Withdrawn   |
| 338034 | M | South Wes A Level or I   | 0 | 60  | N | Fail        |
| 339739 | F | South Regi Lower Thar    | 0 | 60  | Y | Fail        |
| 339924 | M | Amhara Re No Formal      | 3 | 60  | N | Fail        |
| 341854 | M | Tigrai Regi HE Qualific  | 0 | 60  | N | Fail        |
| 341855 | F | Amhara Re Lower Thar     | 0 | 60  | N | Withdrawn   |
| 342100 | M | Addis Abak Lower Thar    | 0 | 60  | N | Pass        |
| 342176 | M | South Regi Lower Thar    | 2 | 60  | N | Withdrawn   |
| 342387 | F | Sidamo Re A Level or I   | 1 | 180 | N | Fail        |
| 342483 | M | Afar Regioi A Level or I | 0 | 90  | N | Withdrawn   |
| 342697 | F | South Wes A Level or I   | 0 | 60  | N | Withdrawn   |
| 342949 | M | Addis Abak A Level or I  | 0 | 70  | N | Fail        |



|        |   |                           |   |     |   |             |
|--------|---|---------------------------|---|-----|---|-------------|
| 343238 | F | Amhara Re Lower Than      | 0 | 120 | N | Pass        |
| 343781 | F | South Regi Post Gradu     | 0 | 60  | N | Distinction |
| 343911 | M | South Regi A Level or I   | 0 | 120 | N | Fail        |
| 344474 | M | South Wes A Level or I    | 1 | 60  | N | Fail        |
| 346333 | F | Oromia Re Lower Than      | 0 | 60  | N | Pass        |
| 348050 | M | Sidamo Re A Level or I    | 1 | 90  | N | Pass        |
| 348547 | M | Amhara Re No Formal       | 0 | 120 | N | Withdrawn   |
| 349182 | M | South Regi A Level or I   | 2 | 120 | N | Fail        |
| 349710 | M | South Regi Lower Than     | 0 | 90  | N | Withdrawn   |
| 350164 | M | Afar Regio Lower Than     | 0 | 60  | Y | Withdrawn   |
| 350644 | M | Sidamo Re A Level or I    | 1 | 90  | N | Fail        |
| 350929 | F | Sidamo Re A Level or I    | 0 | 60  | Y | Distinction |
| 350949 | F | Addis Abak HE Qualific    | 0 | 60  | N | Withdrawn   |
| 352051 | F | Amhara Re Lower Than      | 1 | 60  | N | Pass        |
| 352641 | F | Somalia Re Lower Than     | 0 | 120 | N | Withdrawn   |
| 352771 | F | Sidamo Re A Level or I    | 0 | 60  | N | Pass        |
| 355510 | F | Amhara Re A Level or I    | 1 | 150 | N | Pass        |
| 356274 | M | Afar Regio A Level or I   | 0 | 90  | N | Fail        |
| 358504 | F | Sidamo Re A Level or I    | 0 | 120 | N | Pass        |
| 359855 | F | South Regi A Level or I   | 0 | 60  | N | Withdrawn   |
| 359943 | M | South Regi A Level or I   | 0 | 60  | N | Pass        |
| 361243 | F | South Regi Lower Than     | 0 | 90  | N | Pass        |
| 361282 | M | Tigrai Regio Lower Than   | 1 | 60  | N | Fail        |
| 361889 | F | Tigrai Regio Lower Than   | 0 | 120 | Y | Withdrawn   |
| 362647 | M | North Regi A Level or I   | 0 | 120 | N | Fail        |
| 363990 | F | Sidamo Re A Level or I    | 2 | 60  | Y | Fail        |
| 364239 | M | Somalia Re Lower Than     | 0 | 120 | N | Pass        |
| 364547 | M | South Regi A Level or I   | 0 | 210 | N | Pass        |
| 364770 | M | Amhara Re Lower Than      | 1 | 60  | N | Pass        |
| 365239 | F | South Regi A Level or I   | 0 | 120 | N | Withdrawn   |
| 365893 | M | Amhara Re A Level or I    | 0 | 120 | N | Withdrawn   |
| 365939 | F | Tigrai Regio Lower Than   | 0 | 90  | N | Fail        |
| 366267 | F | North Regi Lower Than     | 1 | 60  | N | Withdrawn   |
| 366449 | M | Addis Abak A Level or I   | 1 | 120 | Y | Pass        |
| 366535 | F | Tigrai Regio A Level or I | 1 | 120 | Y | Withdrawn   |
| 366987 | M | Sidamo Re A Level or I    | 0 | 60  | N | Pass        |
| 367045 | M | Afar Regio Lower Than     | 0 | 240 | N | Withdrawn   |
| 368106 | M | Sidamo Re Lower Than      | 0 | 60  | N | Fail        |
| 368436 | M | Somalia Re Lower Than     | 0 | 60  | N | Pass        |
| 369319 | M | Addis Abak Lower Than     | 0 | 60  | N | Pass        |
| 370294 | F | South Regi A Level or I   | 2 | 70  | Y | Fail        |
| 370336 | M | Somalia Re Lower Than     | 0 | 150 | N | Withdrawn   |
| 370367 | F | Addis Abak HE Qualific    | 0 | 60  | N | Withdrawn   |
| 370920 | F | Oromia Re Lower Than      | 0 | 60  | N | Withdrawn   |
| 371362 | F | South Wes A Level or I    | 2 | 60  | N | Withdrawn   |
| 371679 | F | Oromia Re Lower Than      | 0 | 180 | N | Withdrawn   |
| 373237 | F | Somalia Re Lower Than     | 1 | 150 | Y | Fail        |

|        |   |                          |   |     |   |           |
|--------|---|--------------------------|---|-----|---|-----------|
| 373280 | M | South Wes A Level or I   | 0 | 60  | N | Withdrawn |
| 374636 | M | South Wes A Level or I   | 0 | 120 | N | Pass      |
| 376067 | M | Amhara Re A Level or I   | 2 | 120 | N | Withdrawn |
| 378825 | M | South Wes A Level or I   | 0 | 120 | N | Pass      |
| 379023 | F | Somalia Re HE Qualific   | 0 | 60  | N | Fail      |
| 379124 | F | Sidamo Re A Level or I   | 2 | 70  | N | Pass      |
| 380138 | F | North Regi Lower Thar    | 0 | 90  | N | Fail      |
| 380239 | M | Amhara Re A Level or I   | 0 | 60  | N | Pass      |
| 380253 | F | Addis Abak Post Gradu    | 0 | 60  | N | Pass      |
| 380429 | F | Afar Regio HE Qualific   | 1 | 60  | N | Pass      |
| 380662 | M | Addis Abak A Level or I  | 0 | 90  | N | Pass      |
| 381539 | M | South Regi No Formal     | 1 | 120 | N | Withdrawn |
| 382378 | M | Afar Regio A Level or I  | 0 | 150 | N | Pass      |
| 382742 | M | Amhara Re A Level or I   | 0 | 60  | N | Fail      |
| 382879 | M | Tigrai Regi HE Qualific  | 0 | 120 | N | Fail      |
| 383694 | F | South Wes Lower Thar     | 0 | 60  | N | Pass      |
| 383785 | F | Sidamo Re A Level or I   | 0 | 60  | N | Withdrawn |
| 383978 | M | Afar Regio A Level or I  | 0 | 60  | N | Pass      |
| 384153 | F | Sidamo Re Lower Thar     | 0 | 165 | N | Withdrawn |
| 384999 | F | Sidamo Re HE Qualific    | 0 | 60  | N | Withdrawn |
| 385218 | M | Tigrai Regi A Level or I | 0 | 120 | N | Fail      |
| 385495 | M | Addis Abak A Level or I  | 0 | 60  | N | Withdrawn |
| 385937 | M | South Regi Lower Thar    | 0 | 60  | N | Pass      |
| 386912 | F | South Wes A Level or I   | 0 | 90  | Y | Withdrawn |
| 387359 | M | Oromia Re Lower Thar     | 0 | 90  | N | Withdrawn |
| 387453 | F | South Wes A Level or I   | 0 | 60  | N | Withdrawn |
| 388947 | M | North Regi HE Qualific   | 0 | 60  | N | Pass      |
| 389025 | M | Addis Abak A Level or I  | 0 | 60  | N | Fail      |
| 389362 | F | South Wes Lower Thar     | 1 | 60  | N | Fail      |
| 389639 | M | Afar Regio HE Qualific   | 0 | 60  | N | Pass      |
| 390029 | M | Tigrai Regi A Level or I | 0 | 120 | N | Pass      |
| 390556 | M | Sidamo Re Post Gradu     | 0 | 60  | N | Withdrawn |
| 390690 | F | Afar Regio Lower Thar    | 0 | 60  | N | Pass      |
| 391537 | M | Addis Abak A Level or I  | 2 | 60  | N | Pass      |
| 391578 | M | Addis Abak Lower Thar    | 0 | 60  | N | Fail      |
| 391638 | F | South Wes A Level or I   | 1 | 60  | N | Withdrawn |
| 392626 | F | Sidamo Re Lower Thar     | 1 | 180 | Y | Fail      |
| 392664 | F | South Regi A Level or I  | 0 | 60  | N | Pass      |
| 392713 | M | South Regi A Level or I  | 0 | 60  | N | Fail      |
| 392890 | M | South Regi A Level or I  | 0 | 60  | N | Pass      |
| 394076 | F | South Wes A Level or I   | 1 | 60  | N | Withdrawn |
| 394384 | M | Amhara Re Lower Thar     | 0 | 60  | N | Fail      |
| 394951 | F | South Regi Lower Thar    | 1 | 60  | N | Withdrawn |
| 396028 | M | Tigrai Regi A Level or I | 2 | 60  | N | Fail      |
| 396210 | M | Oromia Re A Level or I   | 2 | 60  | N | Pass      |
| 396292 | M | Tigrai Regi HE Qualific  | 0 | 60  | N | Pass      |
| 396668 | M | Oromia Re A Level or I   | 0 | 60  | N | Pass      |

|        |   |                             |   |     |   |             |
|--------|---|-----------------------------|---|-----|---|-------------|
| 398529 | M | Tigrai Region Lower Than    | 0 | 120 | N | Withdrawn   |
| 399203 | F | Tigrai Region HE Qualific   | 1 | 120 | N | Withdrawn   |
| 399453 | M | South Region A Level or I   | 0 | 60  | Y | Pass        |
| 399794 | F | Afar Region HE Qualific     | 0 | 60  | N | Fail        |
| 399843 | F | South Region Lower Than     | 2 | 120 | N | Fail        |
| 399863 | M | South Region A Level or I   | 0 | 270 | N | Withdrawn   |
| 399935 | M | Amhara Region Lower Than    | 0 | 70  | N | Fail        |
| 400942 | F | North Region Lower Than     | 1 | 300 | N | Withdrawn   |
| 401947 | M | North Region Lower Than     | 0 | 60  | N | Withdrawn   |
| 402210 | F | Sidamo Region No Formal     | 0 | 75  | N | Pass        |
| 402433 | M | South Region A Level or I   | 0 | 120 | N | Fail        |
| 403052 | F | Sidamo Region HE Qualific   | 0 | 150 | N | Fail        |
| 405336 | F | Addis Ababa A Level or I    | 2 | 120 | N | Fail        |
| 405784 | F | Tigrai Region HE Qualific   | 1 | 110 | N | Withdrawn   |
| 406224 | M | Addis Ababa A Level or I    | 0 | 120 | N | Pass        |
| 406498 | F | South Region A Level or I   | 2 | 60  | N | Pass        |
| 407374 | M | North Region Lower Than     | 0 | 60  | N | Distinction |
| 408061 | M | South Region A Level or I   | 0 | 90  | N | Fail        |
| 408239 | M | South West Lower Than       | 2 | 60  | N | Pass        |
| 408817 | F | Sidamo Region A Level or I  | 1 | 60  | N | Fail        |
| 409056 | F | South Region HE Qualific    | 2 | 60  | N | Withdrawn   |
| 409105 | M | Afar Region A Level or I    | 0 | 60  | N | Fail        |
| 409794 | M | Addis Ababa A Level or I    | 0 | 120 | N | Withdrawn   |
| 409880 | F | South Region A Level or I   | 1 | 60  | N | Pass        |
| 409953 | M | South Region A Level or I   | 0 | 60  | N | Pass        |
| 410084 | M | Afar Region A Level or I    | 1 | 60  | N | Fail        |
| 410767 | F | Somalia Region A Level or I | 0 | 90  | Y | Withdrawn   |
| 411707 | F | Amhara Region A Level or I  | 1 | 120 | N | Pass        |
| 411730 | F | South Region A Level or I   | 0 | 60  | N | Withdrawn   |
| 412175 | M | Somalia Region Lower Than   | 0 | 60  | N | Withdrawn   |
| 412618 | M | Amhara Region Lower Than    | 0 | 80  | N | Distinction |
| 414077 | F | Addis Ababa HE Qualific     | 0 | 60  | N | Withdrawn   |
| 414247 | F | Addis Ababa A Level or I    | 0 | 180 | N | Fail        |
| 415151 | M | Somalia Region Lower Than   | 1 | 180 | Y | Withdrawn   |
| 415187 | F | South Region A Level or I   | 0 | 120 | N | Withdrawn   |
| 416243 | F | Somalia Region A Level or I | 1 | 60  | Y | Pass        |
| 416500 | M | Oromia Region A Level or I  | 0 | 90  | N | Fail        |
| 418159 | M | Afar Region Lower Than      | 0 | 60  | N | Withdrawn   |
| 418397 | M | South Region Lower Than     | 0 | 60  | Y | Pass        |
| 419192 | M | Addis Ababa A Level or I    | 0 | 60  | Y | Distinction |
| 419517 | M | Addis Ababa Lower Than      | 0 | 60  | N | Distinction |
| 419822 | F | Amhara Region Lower Than    | 0 | 90  | N | Withdrawn   |
| 420650 | F | Sidamo Region A Level or I  | 0 | 180 | N | Withdrawn   |
| 420745 | M | Sidamo Region A Level or I  | 1 | 150 | N | Withdrawn   |
| 421301 | F | South Region A Level or I   | 0 | 60  | N | Withdrawn   |
| 422276 | F | Amhara Region Lower Than    | 1 | 100 | N | Pass        |
| 422534 | M | South Region Lower Than     | 0 | 60  | N | Fail        |

|        |   |                          |   |     |   |             |
|--------|---|--------------------------|---|-----|---|-------------|
| 423147 | M | South Wes A Level or I   | 0 | 60  | N | Pass        |
| 423474 | F | Addis Abak HE Qualific   | 1 | 150 | N | Withdrawn   |
| 423876 | M | Somalia Re Post Gradu    | 1 | 60  | N | Fail        |
| 425543 | F | Sidamo Re A Level or I   | 0 | 120 | N | Withdrawn   |
| 426059 | M | North Regi A Level or I  | 1 | 80  | N | Pass        |
| 426097 | M | Addis Abak Lower Thar    | 0 | 120 | Y | Withdrawn   |
| 426887 | F | Afar Regioi A Level or I | 0 | 60  | N | Distinction |
| 427248 | F | Amhara Re A Level or I   | 0 | 120 | N | Withdrawn   |
| 427344 | F | Somalia Re A Level or I  | 0 | 60  | N | Fail        |
| 428321 | F | Tigrai Regio Lower Thar  | 1 | 60  | N | Fail        |
| 429212 | M | South Wes HE Qualific    | 0 | 60  | N | Pass        |
| 429854 | F | South Regi No Formal     | 1 | 70  | N | Pass        |
| 430356 | M | Somalia Re Lower Thar    | 2 | 90  | N | Pass        |
| 431005 | M | Sidamo Re A Level or I   | 2 | 180 | N | Pass        |
| 432624 | M | Tigrai Regio Lower Thar  | 2 | 60  | N | Withdrawn   |
| 432862 | F | Sidamo Re Lower Thar     | 0 | 60  | N | Fail        |
| 432968 | F | Sidamo Re Lower Thar     | 0 | 180 | N | Withdrawn   |
| 433508 | M | North Regi Lower Thar    | 1 | 60  | N | Pass        |
| 433748 | M | Amhara Re A Level or I   | 0 | 60  | N | Pass        |
| 434159 | M | South Regi Lower Thar    | 2 | 60  | N | Fail        |
| 435587 | M | North Regi No Formal     | 0 | 150 | N | Pass        |
| 437923 | M | Addis Abak A Level or I  | 0 | 90  | Y | Pass        |
| 438290 | F | Afar Regioi Lower Thar   | 0 | 60  | N | Withdrawn   |
| 438751 | F | South Wes A Level or I   | 0 | 60  | N | Pass        |
| 439568 | F | South Wes A Level or I   | 0 | 90  | Y | Distinction |
| 439713 | F | Somalia Re A Level or I  | 0 | 90  | N | Fail        |
| 439855 | M | Afar Regioi A Level or I | 0 | 90  | N | Pass        |
| 440003 | F | Tigrai Regio Lower Thar  | 0 | 60  | N | Pass        |
| 441342 | M | Addis Abak Lower Thar    | 0 | 60  | N | Pass        |
| 441444 | M | South Regi Lower Thar    | 0 | 90  | N | Pass        |
| 441885 | F | South Regi Lower Thar    | 1 | 60  | N | Fail        |
| 441892 | M | Oromia Re Lower Thar     | 0 | 60  | N | Fail        |
| 442530 | M | Oromia Re Lower Thar     | 0 | 120 | Y | Withdrawn   |
| 442547 | M | Sidamo Re A Level or I   | 0 | 90  | N | Fail        |
| 442589 | F | Sidamo Re Lower Thar     | 0 | 90  | N | Pass        |
| 442590 | M | Afar Regioi Lower Thar   | 0 | 60  | N | Fail        |
| 442878 | F | North Regi A Level or I  | 0 | 120 | N | Fail        |
| 442924 | M | North Regi A Level or I  | 0 | 60  | N | Pass        |
| 443400 | F | South Regi Lower Thar    | 0 | 60  | N | Fail        |
| 443438 | F | Addis Abak Lower Thar    | 0 | 60  | N | Fail        |
| 443540 | F | Tigrai Regio Lower Thar  | 0 | 120 | Y | Withdrawn   |
| 443731 | M | Oromia Re HE Qualific    | 0 | 60  | N | Pass        |
| 444063 | F | Sidamo Re Lower Thar     | 1 | 60  | N | Fail        |
| 444317 | F | Sidamo Re Lower Thar     | 0 | 60  | N | Pass        |
| 444375 | M | South Wes A Level or I   | 0 | 60  | N | Pass        |
| 444541 | F | North Regi A Level or I  | 0 | 60  | N | Withdrawn   |
| 444847 | F | South Regi A Level or I  | 0 | 90  | N | Withdrawn   |

|        |   |                          |   |     |   |             |
|--------|---|--------------------------|---|-----|---|-------------|
| 444909 | M | Afar Region Lower Than   | 1 | 60  | N | Fail        |
| 445109 | F | Afar Region HE Qualific  | 0 | 60  | N | Fail        |
| 445386 | F | Oromia Re Lower Than     | 1 | 60  | N | Pass        |
| 445749 | F | Afar Region A Level or I | 0 | 60  | N | Withdrawn   |
| 445785 | F | Somalia Re A Level or I  | 0 | 60  | N | Withdrawn   |
| 445917 | M | Amhara Re HE Qualific    | 0 | 90  | N | Distinction |
| 445930 | M | South Wes A Level or I   | 1 | 120 | N | Pass        |
| 446246 | M | Afar Region HE Qualific  | 0 | 120 | N | Distinction |
| 446279 | F | Sidamo Re Lower Than     | 0 | 90  | N | Pass        |
| 446448 | F | South Wes A Level or I   | 0 | 60  | Y | Withdrawn   |
| 447059 | F | South Regi A Level or I  | 0 | 60  | N | Pass        |
| 464924 | F | South Regi A Level or I  | 0 | 60  | N | Pass        |
| 465399 | F | Somalia Re Lower Than    | 3 | 60  | Y | Withdrawn   |
| 465418 | M | Somalia Re HE Qualific   | 0 | 60  | N | Withdrawn   |
| 465441 | M | South Regi HE Qualific   | 1 | 60  | N | Pass        |
| 465629 | F | Tigrai Region Lower Than | 0 | 60  | N | Fail        |
| 466158 | F | South Regi Lower Than    | 1 | 180 | Y | Withdrawn   |
| 466539 | F | Sidamo Re A Level or I   | 0 | 60  | N | Pass        |
| 466880 | F | South Wes A Level or I   | 1 | 120 | N | Pass        |
| 467776 | M | Somalia Re A Level or I  | 0 | 60  | N | Withdrawn   |
| 468657 | F | South Regi A Level or I  | 2 | 90  | N | Withdrawn   |
| 468927 | M | Afar Region A Level or I | 0 | 90  | N | Pass        |
| 469389 | F | Addis Abat No Formal     | 0 | 70  | N | Withdrawn   |
| 469465 | M | Addis Abat A Level or I  | 0 | 60  | N | Pass        |
| 469553 | M | South Wes Lower Than     | 0 | 180 | Y | Pass        |
| 470119 | M | South Regi Lower Than    | 1 | 240 | N | Withdrawn   |
| 470403 | F | South Wes A Level or I   | 0 | 150 | N | Fail        |
| 471373 | F | Oromia Re HE Qualific    | 0 | 60  | N | Distinction |
| 472000 | M | Amhara Re Lower Than     | 0 | 120 | N | Pass        |
| 472060 | F | Oromia Re Lower Than     | 2 | 60  | N | Fail        |
| 473104 | F | Addis Abat Lower Than    | 0 | 60  | N | Pass        |
| 473340 | M | South Regi Lower Than    | 0 | 180 | N | Fail        |
| 473378 | M | South Wes A Level or I   | 0 | 60  | N | Withdrawn   |
| 473406 | M | Afar Region Lower Than   | 0 | 120 | N | Withdrawn   |
| 473509 | M | South Regi Lower Than    | 0 | 300 | N | Withdrawn   |
| 473640 | M | Amhara Re Lower Than     | 1 | 60  | N | Withdrawn   |
| 474246 | M | Oromia Re Lower Than     | 1 | 90  | N | Fail        |
| 474385 | F | Amhara Re Lower Than     | 1 | 60  | N | Withdrawn   |
| 474495 | M | South Wes A Level or I   | 0 | 60  | N | Pass        |
| 474508 | F | Somalia Re HE Qualific   | 0 | 60  | N | Withdrawn   |
| 474902 | M | South Regi Lower Than    | 0 | 60  | N | Fail        |
| 476144 | F | Amhara Re HE Qualific    | 0 | 60  | N | Pass        |
| 476170 | F | Addis Abat A Level or I  | 1 | 60  | N | Fail        |
| 476355 | M | Sidamo Re Lower Than     | 0 | 120 | N | Fail        |
| 476822 | F | Sidamo Re A Level or I   | 0 | 60  | N | Fail        |
| 476906 | F | Somalia Re A Level or I  | 0 | 60  | N | Withdrawn   |
| 477120 | F | Oromia Re HE Qualific    | 0 | 60  | N | Pass        |

|        |   |                          |   |     |   |             |
|--------|---|--------------------------|---|-----|---|-------------|
| 477128 | F | Somalia Re A Level or I  | 0 | 60  | N | Pass        |
| 477161 | M | Amhara Re Lower Than     | 1 | 70  | N | Fail        |
| 477348 | F | South Wes A Level or I   | 0 | 60  | N | Pass        |
| 477412 | M | South Regi HE Qualific   | 0 | 60  | N | Pass        |
| 478238 | F | Addis Abak Lower Than    | 1 | 60  | N | Distinction |
| 478244 | M | Amhara Re A Level or I   | 0 | 60  | N | Pass        |
| 478289 | M | South Regi A Level or I  | 0 | 60  | N | Withdrawn   |
| 478692 | F | South Regi Lower Than    | 0 | 165 | N | Withdrawn   |
| 478744 | F | Amhara Re A Level or I   | 2 | 60  | N | Withdrawn   |
| 479141 | F | North Regi A Level or I  | 0 | 60  | N | Pass        |
| 479457 | F | Amhara Re A Level or I   | 0 | 60  | N | Distinction |
| 479848 | M | Sidamo Re A Level or I   | 0 | 120 | N | Distinction |
| 479977 | F | South Regi A Level or I  | 0 | 60  | N | Pass        |
| 480716 | M | South Regi HE Qualific   | 0 | 60  | N | Pass        |
| 480938 | M | South Regi HE Qualific   | 0 | 60  | N | Pass        |
| 481538 | M | Amhara Re Lower Than     | 1 | 60  | N | Pass        |
| 481667 | M | Tigrai Regi HE Qualific  | 0 | 120 | N | Pass        |
| 481863 | F | Afar Regioi A Level or I | 0 | 120 | N | Withdrawn   |
| 482083 | F | South Regi Lower Than    | 0 | 60  | N | Pass        |
| 482173 | F | Afar Regioi A Level or I | 0 | 60  | N | Withdrawn   |
| 482635 | F | Addis Abak A Level or I  | 0 | 60  | N | Withdrawn   |
| 482868 | M | Oromia Re Lower Than     | 0 | 60  | N | Pass        |
| 483362 | M | Addis Abak Lower Than    | 1 | 60  | N | Fail        |
| 483934 | M | Amhara Re Lower Than     | 1 | 60  | N | Fail        |
| 484266 | M | Afar Regioi Lower Than   | 1 | 60  | N | Withdrawn   |
| 484355 | M | Sidamo Re Lower Than     | 1 | 60  | N | Withdrawn   |
| 484423 | F | South Wes A Level or I   | 0 | 60  | N | Pass        |
| 484436 | M | Amhara Re Lower Than     | 1 | 60  | N | Pass        |
| 484999 | M | South Regi Lower Than    | 1 | 60  | N | Withdrawn   |
| 485195 | F | South Wes Lower Than     | 1 | 120 | N | Fail        |
| 485506 | F | South Regi A Level or I  | 0 | 120 | N | Pass        |
| 485519 | F | Amhara Re A Level or I   | 1 | 60  | N | Pass        |
| 485594 | F | South Regi A Level or I  | 1 | 120 | N | Fail        |
| 485734 | M | Tigrai Regio Lower Than  | 0 | 60  | N | Fail        |
| 485791 | F | Afar Regioi A Level or I | 0 | 90  | N | Pass        |
| 485980 | M | Somalia Re Lower Than    | 0 | 210 | N | Withdrawn   |
| 486533 | F | South Wes A Level or I   | 0 | 60  | N | Pass        |
| 486777 | F | Sidamo Re Lower Than     | 0 | 180 | N | Withdrawn   |
| 486877 | M | Oromia Re A Level or I   | 0 | 150 | N | Pass        |
| 486890 | M | Addis Abak A Level or I  | 0 | 60  | N | Pass        |
| 487293 | F | Amhara Re A Level or I   | 1 | 120 | N | Pass        |
| 487556 | M | Somalia Re HE Qualific   | 0 | 60  | N | Withdrawn   |
| 488198 | M | South Regi Lower Than    | 1 | 60  | N | Fail        |
| 488550 | F | Afar Regioi HE Qualific  | 0 | 120 | N | Withdrawn   |
| 488575 | M | Afar Regioi Lower Than   | 0 | 60  | N | Withdrawn   |
| 488680 | M | South Wes A Level or I   | 1 | 80  | N | Distinction |
| 489084 | M | Afar Regioi HE Qualific  | 1 | 60  | N | Fail        |

|        |   |                          |   |     |   |           |
|--------|---|--------------------------|---|-----|---|-----------|
| 489150 | M | South Regi A Level or l  | 1 | 60  | N | Withdrawn |
| 489209 | F | Somalia Re A Level or l  | 0 | 60  | N | Pass      |
| 489410 | F | South Regi Lower Thar    | 0 | 120 | N | Pass      |
| 489990 | F | Amhara Re Lower Thar     | 0 | 120 | N | Fail      |
| 490164 | F | Oromia Re Lower Thar     | 0 | 120 | Y | Withdrawn |
| 490297 | M | Afar Regio Lower Thar    | 0 | 150 | Y | Withdrawn |
| 490530 | M | Tigrai Regi Lower Thar   | 1 | 60  | N | Withdrawn |
| 490738 | M | Amhara Re HE Qualific    | 0 | 60  | N | Withdrawn |
| 491081 | M | Sidamo Re HE Qualific    | 0 | 60  | N | Fail      |
| 491110 | F | South Regi HE Qualific   | 0 | 60  | N | Withdrawn |
| 491688 | M | Oromia Re Lower Thar     | 1 | 210 | Y | Withdrawn |
| 491874 | F | South Regi A Level or l  | 0 | 60  | N | Withdrawn |
| 491875 | F | South Wes Lower Thar     | 1 | 60  | N | Fail      |
| 491912 | M | Addis Abak No Formal     | 0 | 120 | N | Withdrawn |
| 491926 | M | Tigrai Regi Lower Thar   | 0 | 60  | Y | Pass      |
| 492552 | M | Tigrai Regi A Level or l | 1 | 120 | N | Withdrawn |
| 492635 | F | South Wes A Level or l   | 0 | 60  | N | Pass      |
| 492740 | F | Afar Regio HE Qualific   | 0 | 60  | N | Pass      |
| 492842 | F | Amhara Re Lower Thar     | 0 | 60  | Y | Withdrawn |
| 493147 | F | Oromia Re A Level or l   | 0 | 120 | Y | Withdrawn |
| 493207 | F | South Regi Lower Thar    | 0 | 60  | N | Withdrawn |
| 493404 | F | South Regi A Level or l  | 0 | 60  | N | Pass      |
| 493725 | F | Oromia Re Lower Thar     | 0 | 60  | N | Fail      |
| 493876 | M | Sidamo Re A Level or l   | 0 | 90  | N | Withdrawn |
| 493879 | M | Afar Regio A Level or l  | 1 | 120 | Y | Withdrawn |
| 494389 | F | Sidamo Re A Level or l   | 0 | 120 | Y | Withdrawn |
| 494667 | M | Addis Abak Lower Thar    | 0 | 60  | N | Pass      |
| 494722 | F | Afar Regio HE Qualific   | 0 | 60  | N | Withdrawn |
| 494728 | M | North Regi Lower Thar    | 1 | 60  | Y | Withdrawn |
| 495115 | F | Somalia Re Lower Thar    | 1 | 60  | Y | Withdrawn |
| 495762 | M | Tigrai Regi HE Qualific  | 1 | 60  | N | Withdrawn |
| 496154 | F | South Regi A Level or l  | 0 | 60  | N | Withdrawn |
| 496185 | M | South Wes A Level or l   | 0 | 60  | Y | Fail      |
| 496315 | M | South Regi A Level or l  | 1 | 60  | Y | Fail      |
| 496373 | F | Sidamo Re Lower Thar     | 0 | 120 | N | Withdrawn |
| 497229 | F | Amhara Re Lower Thar     | 0 | 90  | N | Fail      |
| 497475 | M | Amhara Re Lower Thar     | 1 | 60  | N | Fail      |
| 497590 | F | South Regi A Level or l  | 0 | 120 | N | Pass      |
| 497809 | M | Sidamo Re A Level or l   | 0 | 120 | N | Fail      |
| 497994 | M | Addis Abak A Level or l  | 1 | 90  | Y | Pass      |
| 498793 | M | Tigrai Regi Lower Thar   | 0 | 240 | Y | Withdrawn |
| 498821 | F | Sidamo Re Lower Thar     | 0 | 60  | N | Pass      |
| 498877 | F | South Regi A Level or l  | 0 | 120 | N | Withdrawn |
| 498903 | M | South Wes Lower Thar     | 0 | 60  | N | Withdrawn |
| 499392 | M | South Wes Lower Thar     | 0 | 60  | Y | Fail      |
| 499469 | M | Tigrai Regi Lower Thar   | 0 | 120 | N | Fail      |
| 500283 | M | South Regi Lower Thar    | 0 | 60  | N | Pass      |

|        |   |                         |   |     |   |             |
|--------|---|-------------------------|---|-----|---|-------------|
| 500339 | M | Amhara Re Lower Tha     | 0 | 60  | N | Withdrawn   |
| 500521 | F | Afar Region Lower Tha   | 0 | 90  | Y | Withdrawn   |
| 500581 | M | Addis Abak Post Gradu   | 0 | 60  | N | Distinction |
| 500707 | F | Addis Abak A Level or I | 1 | 60  | Y | Withdrawn   |
| 500785 | F | South Regi A Level or I | 0 | 60  | Y | Withdrawn   |
| 501203 | M | South Regi Lower Tha    | 0 | 60  | N | Fail        |
| 501488 | F | Amhara Re A Level or I  | 1 | 120 | N | Withdrawn   |
| 501723 | F | South Regi A Level or I | 1 | 120 | N | Withdrawn   |
| 501867 | M | Sidamo Re HE Qualific   | 0 | 90  | N | Pass        |
| 502051 | F | South Regi Lower Tha    | 0 | 90  | N | Withdrawn   |
| 502057 | F | Sidamo Re Lower Tha     | 0 | 120 | N | Withdrawn   |
| 502207 | M | North Regi A Level or I | 1 | 120 | N | Withdrawn   |
| 502466 | M | Sidamo Re Lower Tha     | 0 | 150 | N | Withdrawn   |
| 502477 | F | Oromia Re A Level or I  | 0 | 90  | N | Distinction |
| 502638 | M | Oromia Re Lower Tha     | 0 | 90  | N | Pass        |
| 502642 | M | Addis Abak A Level or I | 0 | 60  | N | Fail        |
| 503023 | F | Oromia Re Lower Tha     | 0 | 60  | N | Pass        |
| 503783 | F | Addis Abak A Level or I | 1 | 60  | N | Pass        |
| 503838 | F | Addis Abak HE Qualific  | 0 | 60  | N | Fail        |
| 504034 | F | South Wes A Level or I  | 0 | 120 | N | Withdrawn   |
| 504064 | F | Addis Abak A Level or I | 0 | 120 | Y | Withdrawn   |
| 504234 | F | Sidamo Re A Level or I  | 0 | 60  | N | Pass        |
| 504368 | M | Addis Abak Lower Tha    | 1 | 60  | N | Fail        |
| 504429 | F | Amhara Re HE Qualific   | 0 | 60  | N | Pass        |
| 504552 | M | Addis Abak Lower Tha    | 0 | 90  | N | Withdrawn   |
| 504596 | M | Tigrai Regi Lower Tha   | 1 | 60  | N | Fail        |
| 504602 | M | Addis Abak HE Qualific  | 1 | 90  | N | Fail        |
| 504862 | F | Afar Region HE Qualific | 0 | 90  | N | Fail        |
| 505142 | M | Sidamo Re Lower Tha     | 0 | 120 | N | Withdrawn   |
| 505209 | F | Addis Abak Lower Tha    | 0 | 240 | N | Withdrawn   |
| 505561 | F | Somalia Re Lower Tha    | 0 | 120 | Y | Withdrawn   |
| 505856 | M | Tigrai Regi Lower Tha   | 0 | 60  | N | Pass        |
| 506476 | F | Addis Abak Lower Tha    | 0 | 60  | Y | Withdrawn   |
| 506582 | F | Sidamo Re A Level or I  | 0 | 60  | N | Distinction |
| 506597 | M | South Regi A Level or I | 1 | 60  | N | Withdrawn   |
| 506829 | F | Amhara Re A Level or I  | 2 | 120 | N | Fail        |
| 507113 | F | Sidamo Re A Level or I  | 0 | 60  | N | Pass        |
| 507115 | M | South Wes A Level or I  | 0 | 120 | N | Fail        |
| 507257 | M | South Regi A Level or I | 0 | 60  | N | Fail        |
| 507285 | M | South Regi A Level or I | 0 | 60  | N | Pass        |
| 507344 | M | South Regi A Level or I | 0 | 120 | N | Pass        |
| 507478 | M | South Regi Lower Tha    | 1 | 90  | N | Fail        |
| 508025 | F | South Regi A Level or I | 0 | 120 | N | Pass        |
| 508227 | F | Somalia Re A Level or I | 0 | 120 | N | Withdrawn   |
| 508246 | M | Tigrai Regi Lower Tha   | 1 | 60  | N | Fail        |
| 508601 | F | Afar Region HE Qualific | 0 | 180 | N | Withdrawn   |
| 508615 | M | Sidamo Re HE Qualific   | 1 | 120 | N | Withdrawn   |



|        |   |                          |   |     |   |             |
|--------|---|--------------------------|---|-----|---|-------------|
| 508637 | M | Afar Region HE Qualific  | 0 | 60  | N | Pass        |
| 508785 | F | South Regi A Level or l  | 0 | 60  | N | Fail        |
| 509102 | M | Oromia Re A Level or l   | 0 | 150 | N | Pass        |
| 509279 | M | Somalia Re A Level or l  | 0 | 60  | N | Pass        |
| 509327 | F | Addis Abak A Level or l  | 0 | 120 | N | Pass        |
| 509416 | F | South Regi A Level or l  | 0 | 120 | N | Withdrawn   |
| 509501 | M | Addis Abak A Level or l  | 0 | 120 | Y | Withdrawn   |
| 509610 | M | Oromia Re Lower Than     | 0 | 60  | Y | Pass        |
| 509929 | M | Afar Region Post Gradu   | 0 | 60  | N | Pass        |
| 510182 | F | Sidamo Re Lower Than     | 0 | 60  | N | Pass        |
| 510864 | F | Sidamo Re A Level or l   | 0 | 120 | N | Pass        |
| 510873 | F | Afar Region HE Qualific  | 1 | 120 | N | Pass        |
| 511282 | F | Amhara Re A Level or l   | 0 | 90  | N | Pass        |
| 511453 | M | South Wes A Level or l   | 0 | 60  | N | Pass        |
| 511636 | M | Somalia Re A Level or l  | 0 | 120 | Y | Withdrawn   |
| 511890 | M | Sidamo Re A Level or l   | 0 | 120 | Y | Withdrawn   |
| 512050 | M | Amhara Re Lower Than     | 1 | 60  | N | Fail        |
| 512259 | M | South Regi Lower Than    | 0 | 60  | N | Pass        |
| 512525 | M | Tigrai Regi A Level or l | 0 | 90  | Y | Withdrawn   |
| 512706 | M | Somalia Re A Level or l  | 0 | 60  | Y | Fail        |
| 513007 | M | Somalia Re A Level or l  | 1 | 90  | N | Fail        |
| 513204 | F | Tigrai Regi A Level or l | 0 | 60  | N | Withdrawn   |
| 513349 | F | Somalia Re A Level or l  | 0 | 75  | N | Fail        |
| 513356 | M | North Regi Lower Than    | 1 | 120 | N | Withdrawn   |
| 513482 | M | Somalia Re Lower Than    | 0 | 60  | N | Fail        |
| 513499 | M | South Wes A Level or l   | 0 | 60  | N | Pass        |
| 513853 | F | Addis Abak A Level or l  | 0 | 60  | N | Pass        |
| 513954 | F | South Wes Lower Than     | 1 | 60  | N | Fail        |
| 514125 | F | South Wes A Level or l   | 1 | 90  | N | Pass        |
| 514218 | F | Oromia Re Lower Than     | 1 | 60  | N | Withdrawn   |
| 514495 | M | Oromia Re A Level or l   | 0 | 90  | N | Withdrawn   |
| 514852 | F | Afar Region Lower Than   | 0 | 60  | N | Fail        |
| 514934 | F | Amhara Re A Level or l   | 0 | 60  | N | Withdrawn   |
| 515056 | M | South Wes HE Qualific    | 0 | 60  | N | Pass        |
| 515247 | F | Addis Abak A Level or l  | 0 | 150 | N | Withdrawn   |
| 515520 | M | Afar Region Lower Than   | 0 | 60  | Y | Pass        |
| 516343 | M | Somalia Re Lower Than    | 1 | 60  | N | Fail        |
| 516653 | M | South Wes Lower Than     | 1 | 60  | N | Fail        |
| 516946 | M | South Regi A Level or l  | 0 | 60  | N | Fail        |
| 517093 | M | Afar Region A Level or l | 0 | 75  | N | Distinction |
| 517416 | M | Tigrai Regi A Level or l | 0 | 60  | N | Pass        |
| 518194 | F | South Wes Lower Than     | 0 | 60  | N | Withdrawn   |
| 518709 | M | Somalia Re Lower Than    | 0 | 60  | N | Withdrawn   |
| 518731 | M | Oromia Re A Level or l   | 1 | 60  | N | Fail        |
| 518951 | M | Sidamo Re Lower Than     | 0 | 60  | N | Fail        |
| 519100 | F | South Wes HE Qualific    | 0 | 60  | N | Withdrawn   |
| 519211 | M | Sidamo Re A Level or l   | 0 | 60  | N | Fail        |

|        |   |                         |   |     |   |             |
|--------|---|-------------------------|---|-----|---|-------------|
| 519358 | M | Addis Abat A Level or   | 0 | 60  | N | Withdrawn   |
| 519449 | M | Somalia Re A Level or   | 1 | 120 | N | Withdrawn   |
| 519552 | F | Afar Region HE Qualific | 0 | 60  | N | Pass        |
| 519961 | F | South Regi Lower Than   | 1 | 120 | N | Fail        |
| 520150 | F | South Wes HE Qualific   | 0 | 60  | N | Pass        |
| 520891 | M | South Regi Lower Than   | 0 | 90  | N | Pass        |
| 522312 | M | Sidamo Re A Level or    | 0 | 90  | N | Pass        |
| 522363 | F | Sidamo Re HE Qualific   | 0 | 120 | N | Withdrawn   |
| 522473 | F | North Regi Lower Than   | 0 | 60  | N | Pass        |
| 522538 | F | Sidamo Re A Level or    | 1 | 60  | N | Withdrawn   |
| 522690 | F | Somalia Re A Level or   | 0 | 150 | N | Withdrawn   |
| 522777 | M | South Wes A Level or    | 1 | 60  | N | Pass        |
| 523047 | F | Tigrai Regi A Level or  | 1 | 60  | N | Fail        |
| 523248 | M | Tigrai Regi A Level or  | 0 | 60  | N | Pass        |
| 523275 | M | South Wes A Level or    | 1 | 120 | N | Withdrawn   |
| 523583 | F | Sidamo Re A Level or    | 0 | 120 | Y | Withdrawn   |
| 523632 | M | South Regi Lower Than   | 0 | 60  | N | Withdrawn   |
| 523834 | F | North Regi A Level or   | 0 | 90  | N | Withdrawn   |
| 524261 | F | Afar Region HE Qualific | 1 | 60  | Y | Withdrawn   |
| 524575 | F | Afar Region A Level or  | 0 | 60  | N | Distinction |
| 524711 | F | South Wes Lower Than    | 0 | 120 | N | Pass        |
| 524730 | F | South Regi Lower Than   | 0 | 60  | N | Withdrawn   |
| 524791 | F | Sidamo Re Lower Than    | 0 | 120 | N | Fail        |
| 525189 | M | Somalia Re Lower Than   | 1 | 60  | N | Withdrawn   |
| 525456 | F | Addis Abat A Level or   | 0 | 60  | Y | Pass        |
| 525472 | M | Addis Abat Lower Than   | 0 | 60  | N | Distinction |
| 525800 | F | Addis Abat No Formal    | 1 | 60  | N | Withdrawn   |
| 526098 | M | North Regi Post Gradu   | 0 | 150 | N | Withdrawn   |
| 526158 | M | South Regi Lower Than   | 0 | 60  | N | Pass        |
| 526242 | F | South Wes A Level or    | 0 | 60  | N | Pass        |
| 526659 | F | Somalia Re A Level or   | 0 | 90  | N | Withdrawn   |
| 526679 | F | Sidamo Re A Level or    | 0 | 60  | N | Pass        |
| 527427 | F | Sidamo Re A Level or    | 0 | 90  | N | Pass        |
| 527574 | F | Amhara Re Lower Than    | 0 | 60  | N | Pass        |
| 527751 | M | Oromia Re Lower Than    | 0 | 60  | N | Fail        |
| 527954 | F | Amhara Re A Level or    | 0 | 210 | N | Fail        |
| 528467 | M | Addis Abat A Level or   | 0 | 120 | N | Pass        |
| 528551 | F | North Regi A Level or   | 0 | 120 | N | Pass        |
| 528892 | M | South Wes A Level or    | 0 | 90  | N | Pass        |
| 528971 | F | Addis Abat A Level or   | 0 | 60  | N | Fail        |
| 529073 | M | Amhara Re Lower Than    | 0 | 100 | N | Withdrawn   |
| 529226 | M | Addis Abat A Level or   | 1 | 60  | N | Fail        |
| 529522 | F | Sidamo Re A Level or    | 0 | 60  | N | Fail        |
| 529670 | M | Sidamo Re Lower Than    | 1 | 60  | N | Withdrawn   |
| 529868 | F | Sidamo Re A Level or    | 0 | 60  | N | Pass        |
| 530270 | M | South Regi A Level or   | 1 | 180 | N | Withdrawn   |
| 530519 | M | South Regi Lower Than   | 0 | 60  | N | Withdrawn   |

|        |   |                         |   |     |   |             |
|--------|---|-------------------------|---|-----|---|-------------|
| 530967 | M | Sidamo Re A Level or I  | 0 | 60  | N | Pass        |
| 531234 | F | South Regi Lower Tha    | 0 | 120 | N | Withdrawn   |
| 531402 | F | Sidamo Re HE Qualific   | 0 | 60  | N | Pass        |
| 531888 | F | Addis Abak Lower Tha    | 1 | 60  | N | Fail        |
| 532020 | M | Afar Regio HE Qualific  | 0 | 90  | N | Pass        |
| 532116 | F | South Regi A Level or I | 0 | 60  | N | Pass        |
| 532144 | M | Sidamo Re A Level or I  | 2 | 60  | N | Pass        |
| 532683 | F | Afar Regio A Level or I | 0 | 60  | N | Withdrawn   |
| 532859 | M | Afar Regio HE Qualific  | 0 | 180 | N | Withdrawn   |
| 532863 | M | South Wes Lower Tha     | 0 | 60  | N | Fail        |
| 532941 | M | Addis Abak Lower Tha    | 1 | 90  | Y | Fail        |
| 533988 | M | South Regi Lower Tha    | 0 | 60  | N | Pass        |
| 534093 | M | Sidamo Re A Level or I  | 0 | 60  | N | Pass        |
| 535161 | M | South Regi Lower Tha    | 1 | 60  | N | Pass        |
| 535220 | M | Addis Abak Lower Tha    | 0 | 60  | N | Withdrawn   |
| 535351 | M | Amhara Re Lower Tha     | 0 | 120 | N | Fail        |
| 535632 | F | Amhara Re A Level or I  | 0 | 60  | N | Fail        |
| 535707 | F | South Wes A Level or I  | 1 | 90  | N | Withdrawn   |
| 535794 | F | Amhara Re Lower Tha     | 0 | 60  | N | Fail        |
| 536199 | M | Addis Abak A Level or I | 0 | 60  | N | Pass        |
| 536210 | M | South Wes Lower Tha     | 1 | 60  | Y | Withdrawn   |
| 536979 | M | Afar Regio HE Qualific  | 0 | 120 | N | Fail        |
| 537652 | F | South Regi Lower Tha    | 1 | 90  | N | Withdrawn   |
| 537691 | F | North Regi Lower Tha    | 0 | 90  | N | Withdrawn   |
| 537747 | F | North Regi HE Qualific  | 0 | 60  | N | Pass        |
| 537811 | F | Somalia Re A Level or I | 0 | 60  | Y | Distinction |
| 537918 | F | Oromia Re A Level or I  | 1 | 60  | N | Fail        |
| 537962 | M | Addis Abak Lower Tha    | 0 | 60  | N | Pass        |
| 538863 | F | Amhara Re A Level or I  | 0 | 60  | N | Pass        |
| 538903 | M | Somalia Re Lower Tha    | 0 | 60  | Y | Pass        |
| 539872 | F | South Regi A Level or I | 0 | 120 | N | Withdrawn   |
| 540806 | F | Addis Abak A Level or I | 0 | 60  | N | Pass        |
| 540947 | M | Sidamo Re Lower Tha     | 0 | 150 | N | Pass        |
| 541108 | F | Addis Abak Lower Tha    | 0 | 60  | Y | Pass        |
| 541482 | M | Addis Abak Lower Tha    | 1 | 60  | N | Pass        |
| 542180 | F | South Wes Lower Tha     | 0 | 240 | Y | Pass        |
| 542244 | F | North Regi Lower Tha    | 0 | 60  | N | Withdrawn   |
| 542321 | M | North Regi HE Qualific  | 1 | 60  | N | Withdrawn   |
| 542558 | M | Addis Abak A Level or I | 0 | 60  | N | Pass        |
| 543481 | M | Addis Abak Lower Tha    | 0 | 90  | N | Fail        |
| 543648 | F | South Regi A Level or I | 0 | 120 | Y | Fail        |
| 543683 | M | Afar Regio Lower Tha    | 1 | 60  | N | Fail        |
| 543723 | M | South Regi HE Qualific  | 0 | 60  | N | Pass        |
| 543788 | F | South Regi A Level or I | 0 | 60  | N | Pass        |
| 543825 | M | North Regi Lower Tha    | 0 | 120 | N | Pass        |
| 544031 | M | South Wes A Level or I  | 0 | 180 | N | Withdrawn   |
| 544155 | M | Amhara Re Lower Tha     | 0 | 120 | N | Withdrawn   |

|        |   |                                  |   |     |   |             |
|--------|---|----------------------------------|---|-----|---|-------------|
| 544499 | F | Tigray Region Lower Than         | 1 | 180 | N | Withdrawn   |
| 544576 | M | South West A Level or Higher     | 0 | 60  | Y | Pass        |
| 544587 | F | Oromia Region Lower Than         | 0 | 120 | Y | Withdrawn   |
| 544594 | M | Sidamo Region A Level or Higher  | 0 | 90  | N | Distinction |
| 544649 | M | North Region Lower Than          | 1 | 60  | N | Withdrawn   |
| 544982 | M | Sidamo Region Lower Than         | 0 | 60  | N | Fail        |
| 545093 | F | South West A Level or Higher     | 0 | 60  | N | Pass        |
| 545124 | F | Addis Ababa Lower Than           | 0 | 60  | N | Fail        |
| 545179 | M | South Region HE Qualification    | 0 | 90  | N | Fail        |
| 545211 | M | Amhara Region A Level or Higher  | 0 | 120 | N | Pass        |
| 545255 | M | Addis Ababa A Level or Higher    | 0 | 90  | N | Pass        |
| 545769 | M | South West Lower Than            | 0 | 60  | N | Pass        |
| 545991 | M | Tigray Region A Level or Higher  | 0 | 90  | N | Fail        |
| 546293 | M | Afar Region HE Qualification     | 1 | 60  | Y | Fail        |
| 546403 | M | Amhara Region Lower Than         | 1 | 180 | N | Withdrawn   |
| 546722 | F | South West A Level or Higher     | 0 | 60  | N | Pass        |
| 546809 | F | South Region Lower Than          | 0 | 60  | N | Withdrawn   |
| 546852 | F | Addis Ababa A Level or Higher    | 0 | 60  | N | Pass        |
| 547378 | M | Tigray Region A Level or Higher  | 1 | 120 | N | Withdrawn   |
| 547448 | M | South Region Lower Than          | 0 | 60  | N | Distinction |
| 547584 | M | Sidamo Region Lower Than         | 0 | 60  | N | Fail        |
| 547737 | F | Sidamo Region Lower Than         | 0 | 60  | N | Pass        |
| 547784 | F | South Region Lower Than          | 1 | 120 | Y | Fail        |
| 548027 | F | Amhara Region A Level or Higher  | 0 | 60  | N | Pass        |
| 548173 | F | Addis Ababa Lower Than           | 1 | 60  | N | Fail        |
| 548301 | F | South Region HE Qualification    | 0 | 60  | N | Pass        |
| 548825 | F | South West Lower Than            | 0 | 60  | N | Withdrawn   |
| 548851 | M | Sidamo Region Lower Than         | 0 | 60  | N | Withdrawn   |
| 549032 | F | Oromia Region A Level or Higher  | 0 | 120 | N | Pass        |
| 549113 | M | Sidamo Region A Level or Higher  | 1 | 90  | N | Pass        |
| 549160 | M | Addis Ababa A Level or Higher    | 0 | 120 | N | Withdrawn   |
| 549337 | M | South West A Level or Higher     | 0 | 60  | N | Withdrawn   |
| 549424 | M | South Region Post Graduate       | 1 | 60  | N | Withdrawn   |
| 549601 | M | South Region Lower Than          | 0 | 60  | Y | Withdrawn   |
| 550142 | F | Oromia Region A Level or Higher  | 1 | 60  | N | Withdrawn   |
| 550331 | M | Oromia Region Lower Than         | 0 | 60  | N | Pass        |
| 550380 | M | Afar Region Lower Than           | 0 | 120 | N | Withdrawn   |
| 550814 | M | South West Lower Than            | 0 | 90  | N | Pass        |
| 551126 | M | Sidamo Region Lower Than         | 0 | 60  | N | Pass        |
| 551214 | M | Oromia Region A Level or Higher  | 0 | 60  | N | Pass        |
| 551456 | M | South Region Lower Than          | 0 | 60  | N | Fail        |
| 551674 | F | Sidamo Region A Level or Higher  | 1 | 120 | N | Withdrawn   |
| 551760 | M | Somalia Region A Level or Higher | 0 | 60  | N | Fail        |
| 551774 | M | Sidamo Region Lower Than         | 0 | 60  | N | Withdrawn   |
| 552003 | F | Sidamo Region A Level or Higher  | 0 | 120 | N | Withdrawn   |
| 552192 | M | Somalia Region Lower Than        | 1 | 90  | N | Withdrawn   |
| 552282 | M | Somalia Region HE Qualification  | 0 | 60  | N | Fail        |

|        |   |                           |   |     |   |             |
|--------|---|---------------------------|---|-----|---|-------------|
| 552313 | F | Afar Region Lower Than    | 0 | 60  | N | Pass        |
| 552537 | M | Afar Region A Level or    | 0 | 120 | Y | Pass        |
| 552747 | F | Addis Ababa Lower Than    | 0 | 60  | N | Pass        |
| 552898 | M | South West A Level or     | 0 | 240 | Y | Pass        |
| 553170 | F | North Region Post Gradu   | 0 | 90  | N | Withdrawn   |
| 553280 | F | South Region A Level or   | 0 | 120 | N | Pass        |
| 553301 | M | Amhara Region Lower Than  | 0 | 60  | N | Pass        |
| 553353 | M | Addis Ababa Lower Than    | 0 | 60  | N | Fail        |
| 553719 | M | South Region A Level or   | 0 | 60  | N | Distinction |
| 553832 | F | Addis Ababa Lower Than    | 0 | 60  | N | Fail        |
| 553992 | M | North Region Lower Than   | 0 | 210 | N | Withdrawn   |
| 554283 | M | South West A Level or     | 0 | 60  | N | Pass        |
| 554356 | M | Afar Region A Level or    | 0 | 60  | N | Pass        |
| 554691 | M | Amhara Region Lower Than  | 1 | 60  | Y | Pass        |
| 555239 | F | Sidamo Region A Level or  | 0 | 60  | N | Distinction |
| 555316 | M | South West Lower Than     | 0 | 120 | Y | Fail        |
| 555422 | F | Sidamo Region A Level or  | 0 | 180 | N | Withdrawn   |
| 555636 | M | Amhara Region A Level or  | 0 | 240 | N | Withdrawn   |
| 555644 | M | North Region Lower Than   | 0 | 60  | N | Fail        |
| 555791 | F | Afar Region A Level or    | 0 | 60  | Y | Fail        |
| 556539 | M | South Region A Level or   | 0 | 120 | N | Pass        |
| 556751 | M | South West A Level or     | 0 | 60  | N | Withdrawn   |
| 556821 | M | Tigray Region Lower Than  | 0 | 220 | N | Withdrawn   |
| 557247 | F | Sidamo Region A Level or  | 1 | 60  | Y | Withdrawn   |
| 557320 | F | South Region Lower Than   | 0 | 60  | Y | Withdrawn   |
| 557474 | M | Sidamo Region A Level or  | 0 | 60  | N | Fail        |
| 558021 | M | North Region Lower Than   | 0 | 60  | N | Pass        |
| 558029 | M | Afar Region HE Qualific   | 0 | 120 | N | Withdrawn   |
| 558052 | F | Amhara Region Lower Than  | 0 | 120 | N | Withdrawn   |
| 558140 | M | Amhara Region A Level or  | 0 | 60  | N | Fail        |
| 558610 | F | Afar Region Lower Than    | 1 | 120 | N | Fail        |
| 558765 | F | Sidamo Region Lower Than  | 0 | 60  | N | Fail        |
| 559096 | M | Sidamo Region A Level or  | 0 | 60  | N | Pass        |
| 559123 | M | Addis Ababa A Level or    | 0 | 60  | Y | Pass        |
| 559140 | F | Afar Region A Level or    | 0 | 60  | N | Pass        |
| 559540 | M | Sidamo Region A Level or  | 0 | 150 | N | Fail        |
| 559547 | M | South Region A Level or   | 0 | 60  | Y | Withdrawn   |
| 559680 | M | North Region A Level or   | 0 | 60  | N | Pass        |
| 559735 | M | Amhara Region A Level or  | 0 | 120 | N | Withdrawn   |
| 559855 | M | South Region Lower Than   | 0 | 60  | N | Withdrawn   |
| 559908 | M | Sidamo Region A Level or  | 1 | 120 | N | Pass        |
| 559992 | F | North Region HE Qualific  | 1 | 60  | N | Pass        |
| 560015 | M | North Region Lower Than   | 0 | 60  | N | Fail        |
| 560243 | F | South West A Level or     | 0 | 120 | N | Pass        |
| 560423 | M | North Region HE Qualific  | 0 | 120 | N | Withdrawn   |
| 560458 | F | Oromia Region A Level or  | 0 | 60  | N | Pass        |
| 560486 | M | Tigray Region HE Qualific | 0 | 120 | N | Pass        |

|        |   |                            |   |     |   |             |
|--------|---|----------------------------|---|-----|---|-------------|
| 560493 | F | Tigray Region HE Qualific  | 0 | 120 | N | Pass        |
| 560759 | M | South Region A Level or l  | 0 | 60  | N | Pass        |
| 560870 | F | South Region A Level or l  | 0 | 60  | N | Withdrawn   |
| 560879 | F | Amhara Region A Level or l | 0 | 60  | N | Pass        |
| 560948 | F | Addis Ababa A Level or l   | 0 | 60  | N | Fail        |
| 561072 | M | Addis Ababa HE Qualific    | 0 | 60  | N | Pass        |
| 561195 | M | Afar Region Lower Than     | 0 | 60  | N | Pass        |
| 561272 | F | Tigray Region A Level or l | 0 | 120 | Y | Fail        |
| 561476 | M | Addis Ababa Lower Than     | 0 | 60  | N | Pass        |
| 561515 | M | South West A Level or l    | 0 | 60  | N | Pass        |
| 561734 | M | North Region Lower Than    | 1 | 120 | N | Distinction |
| 561807 | M | North Region HE Qualific   | 0 | 60  | N | Distinction |
| 561810 | M | Addis Ababa A Level or l   | 0 | 60  | N | Pass        |
| 561819 | F | South Region A Level or l  | 0 | 120 | N | Distinction |
| 561823 | M | Oromia Region A Level or l | 0 | 120 | N | Withdrawn   |
| 561881 | M | Oromia Region A Level or l | 0 | 60  | N | Distinction |
| 561905 | F | Sidamo Region A Level or l | 0 | 60  | N | Withdrawn   |
| 561955 | M | Addis Ababa Lower Than     | 0 | 60  | N | Pass        |
| 562064 | F | Amhara Region A Level or l | 0 | 120 | N | Fail        |
| 562096 | F | North Region A Level or l  | 0 | 60  | N | Withdrawn   |
| 562100 | M | Amhara Region A Level or l | 0 | 60  | Y | Withdrawn   |
| 562287 | F | Amhara Region A Level or l | 0 | 60  | Y | Withdrawn   |
| 562437 | M | Oromia Region A Level or l | 0 | 90  | N | Pass        |
| 562490 | M | Addis Ababa Lower Than     | 0 | 90  | N | Withdrawn   |
| 562548 | F | Sidamo Region A Level or l | 0 | 120 | N | Withdrawn   |
| 562561 | M | Sidamo Region Lower Than   | 0 | 60  | N | Withdrawn   |
| 562585 | F | Oromia Region No Formal    | 0 | 90  | N | Withdrawn   |
| 562728 | M | Sidamo Region A Level or l | 0 | 120 | N | Pass        |
| 562758 | F | Amhara Region A Level or l | 0 | 180 | Y | Withdrawn   |
| 562929 | M | Addis Ababa Lower Than     | 0 | 120 | N | Withdrawn   |
| 563016 | M | Sidamo Region HE Qualific  | 0 | 60  | N | Pass        |
| 563503 | M | Amhara Region Lower Than   | 0 | 120 | N | Withdrawn   |
| 563675 | M | South West Lower Than      | 0 | 60  | Y | Pass        |
| 563718 | M | South Region Lower Than    | 0 | 60  | N | Withdrawn   |
| 563770 | M | South Region Lower Than    | 0 | 90  | N | Fail        |
| 563819 | M | Oromia Region A Level or l | 0 | 90  | Y | Pass        |
| 563847 | F | South West Lower Than      | 0 | 75  | N | Withdrawn   |
| 563862 | M | Addis Ababa A Level or l   | 0 | 60  | N | Fail        |
| 563888 | F | South West HE Qualific     | 0 | 90  | N | Withdrawn   |
| 563971 | M | Amhara Region Lower Than   | 0 | 60  | N | Pass        |
| 564213 | M | Sidamo Region Lower Than   | 0 | 60  | N | Pass        |
| 564325 | F | Amhara Region Lower Than   | 0 | 120 | Y | Withdrawn   |
| 564356 | F | Sidamo Region A Level or l | 0 | 60  | N | Pass        |
| 564454 | M | Afar Region A Level or l   | 0 | 60  | Y | Fail        |
| 565175 | M | Amhara Region Lower Than   | 0 | 60  | N | Pass        |
| 565301 | M | Somalia Region Lower Than  | 0 | 60  | N | Pass        |
| 565570 | M | South Region A Level or l  | 0 | 90  | N | Fail        |

|        |   |                         |   |     |   |             |
|--------|---|-------------------------|---|-----|---|-------------|
| 565657 | F | Somalia Re Lower Than   | 0 | 60  | N | Pass        |
| 565662 | F | Oromia Re A Level or    | 0 | 60  | N | Withdrawn   |
| 566134 | M | Amhara Re Lower Than    | 0 | 60  | N | Withdrawn   |
| 566185 | F | South Regi A Level or   | 0 | 120 | N | Pass        |
| 566381 | F | North Regi A Level or   | 0 | 120 | N | Fail        |
| 566445 | F | Amhara Re A Level or    | 0 | 60  | N | Withdrawn   |
| 566482 | F | Sidamo Re, A Level or   | 0 | 120 | N | Withdrawn   |
| 566553 | F | Afar Regio HE Qualific  | 0 | 90  | N | Withdrawn   |
| 566704 | F | Tigrai Regi HE Qualific | 0 | 90  | N | Withdrawn   |
| 566795 | M | Sidamo Re, HE Qualific  | 0 | 90  | N | Fail        |
| 566810 | M | South Regi Lower Than   | 0 | 60  | N | Fail        |
| 566979 | M | Amhara Re Lower Than    | 0 | 90  | N | Distinction |
| 567152 | M | Sidamo Re, HE Qualific  | 0 | 60  | N | Pass        |
| 567167 | M | Addis Abak A Level or   | 0 | 120 | N | Pass        |
| 567176 | F | North Regi A Level or   | 0 | 60  | N | Withdrawn   |
| 567246 | M | Oromia Re A Level or    | 0 | 90  | N | Withdrawn   |
| 567292 | M | South Wes A Level or    | 0 | 60  | N | Pass        |
| 567304 | M | Sidamo Re, Lower Than   | 0 | 60  | N | Pass        |
| 567417 | M | South Regi Lower Than   | 0 | 60  | N | Pass        |
| 567451 | M | Amhara Re Lower Than    | 0 | 210 | N | Pass        |
| 567970 | F | Tigrai Regi A Level or  | 0 | 60  | N | Fail        |
| 568043 | M | Sidamo Re, A Level or   | 0 | 60  | N | Fail        |
| 568045 | M | Addis Abak Lower Than   | 0 | 120 | N | Withdrawn   |
| 568068 | M | Afar Regio Lower Than   | 0 | 60  | N | Fail        |
| 568196 | F | South Regi Lower Than   | 0 | 60  | Y | Pass        |
| 568223 | M | South Wes Lower Than    | 0 | 120 | N | Distinction |
| 568296 | M | Somalia Re Lower Than   | 0 | 150 | N | Withdrawn   |
| 568422 | M | Addis Abak Lower Than   | 0 | 60  | N | Fail        |
| 568566 | F | Sidamo Re, A Level or   | 0 | 60  | N | Pass        |
| 568578 | M | South Regi A Level or   | 0 | 60  | N | Fail        |
| 568580 | M | Addis Abak Lower Than   | 0 | 60  | N | Withdrawn   |
| 568598 | M | Addis Abak Lower Than   | 0 | 60  | N | Pass        |
| 568668 | M | Addis Abak A Level or   | 0 | 60  | N | Fail        |
| 568741 | F | South Regi A Level or   | 0 | 60  | N | Withdrawn   |
| 568835 | F | Sidamo Re, A Level or   | 0 | 60  | N | Fail        |
| 568948 | M | Amhara Re A Level or    | 0 | 90  | N | Pass        |
| 568963 | M | Tigrai Regi A Level or  | 0 | 120 | N | Pass        |
| 569279 | M | Tigrai Regi Lower Than  | 0 | 60  | N | Fail        |
| 569743 | F | Addis Abak HE Qualific  | 0 | 120 | N | Withdrawn   |
| 569857 | M | Sidamo Re, A Level or   | 0 | 120 | N | Withdrawn   |
| 569891 | M | South Wes HE Qualific   | 0 | 90  | N | Withdrawn   |
| 569928 | M | Oromia Re A Level or    | 0 | 150 | N | Pass        |
| 569935 | F | Addis Abak A Level or   | 0 | 120 | N | Pass        |
| 569978 | M | Amhara Re A Level or    | 0 | 165 | N | Pass        |
| 570237 | F | Amhara Re A Level or    | 0 | 60  | N | Pass        |
| 570319 | M | South Regi HE Qualific  | 0 | 60  | N | Withdrawn   |
| 570401 | F | North Regi Lower Than   | 0 | 120 | N | Withdrawn   |

|        |   |                          |   |     |   |             |
|--------|---|--------------------------|---|-----|---|-------------|
| 570403 | M | Afar Region HE Qualific  | 0 | 60  | N | Pass        |
| 570531 | M | South Regi A Level or I  | 0 | 70  | N | Pass        |
| 570630 | M | North Regi A Level or I  | 0 | 60  | N | Pass        |
| 570671 | M | South Wes A Level or I   | 0 | 120 | Y | Pass        |
| 570871 | F | South Regi A Level or I  | 0 | 120 | N | Pass        |
| 570872 | F | Sidamo Re A Level or I   | 0 | 90  | Y | Pass        |
| 570896 | M | South Regi A Level or I  | 0 | 120 | N | Pass        |
| 571000 | M | Addis Abak Lower Than    | 0 | 195 | N | Withdrawn   |
| 571055 | M | Tigrai Regi Lower Than   | 0 | 120 | N | Fail        |
| 571131 | M | Tigrai Regi Lower Than   | 0 | 60  | N | Pass        |
| 571242 | M | Sidamo Re A Level or I   | 0 | 60  | N | Pass        |
| 571382 | M | Amhara Re A Level or I   | 0 | 60  | N | Withdrawn   |
| 571451 | F | South Regi A Level or I  | 0 | 120 | N | Pass        |
| 571512 | F | North Regi HE Qualific   | 0 | 60  | N | Pass        |
| 571640 | M | South Regi A Level or I  | 0 | 120 | N | Fail        |
| 571682 | M | Addis Abak A Level or I  | 0 | 120 | Y | Withdrawn   |
| 571716 | M | South Wes Lower Than     | 0 | 60  | N | Fail        |
| 571765 | M | Oromia Re No Formal      | 0 | 60  | N | Pass        |
| 571776 | M | North Regi A Level or I  | 0 | 120 | N | Pass        |
| 571808 | M | South Regi A Level or I  | 0 | 90  | N | Pass        |
| 571921 | F | Afar Region HE Qualific  | 0 | 60  | N | Distinction |
| 571950 | M | Amhara Re No Formal      | 0 | 90  | N | Withdrawn   |
| 571951 | M | Sidamo Re Lower Than     | 0 | 60  | N | Pass        |
| 572038 | M | Sidamo Re A Level or I   | 0 | 120 | N | Withdrawn   |
| 572060 | M | South Wes Lower Than     | 0 | 60  | Y | Pass        |
| 572087 | M | Addis Abak A Level or I  | 0 | 120 | N | Withdrawn   |
| 572089 | M | Afar Region Lower Than   | 0 | 60  | N | Withdrawn   |
| 572134 | M | Amhara Re Lower Than     | 0 | 120 | N | Fail        |
| 572143 | M | Oromia Re A Level or I   | 0 | 120 | Y | Withdrawn   |
| 572149 | F | Sidamo Re A Level or I   | 0 | 60  | N | Pass        |
| 572231 | F | Afar Region Lower Than   | 0 | 150 | Y | Pass        |
| 572233 | M | Sidamo Re Lower Than     | 0 | 120 | N | Pass        |
| 572241 | F | Sidamo Re A Level or I   | 0 | 120 | N | Fail        |
| 572280 | M | Tigrai Regi Lower Than   | 0 | 60  | N | Pass        |
| 572281 | M | Somalia Re A Level or I  | 0 | 120 | Y | Withdrawn   |
| 572338 | M | Sidamo Re A Level or I   | 0 | 60  | N | Pass        |
| 572348 | F | South Wes A Level or I   | 0 | 60  | N | Distinction |
| 572382 | M | South Regi A Level or I  | 0 | 120 | N | Pass        |
| 572431 | M | South Wes A Level or I   | 0 | 60  | N | Pass        |
| 572452 | M | Oromia Re A Level or I   | 0 | 120 | N | Fail        |
| 572457 | M | Addis Abak HE Qualific   | 0 | 60  | N | Pass        |
| 572460 | F | South Wes A Level or I   | 0 | 90  | N | Fail        |
| 572470 | M | Afar Region A Level or I | 0 | 60  | N | Fail        |
| 572548 | F | South Regi Lower Than    | 0 | 60  | N | Withdrawn   |
| 572567 | F | North Regi Lower Than    | 0 | 150 | N | Withdrawn   |
| 572620 | M | Addis Abak Lower Than    | 0 | 150 | N | Withdrawn   |
| 572648 | M | South Wes A Level or I   | 0 | 60  | N | Fail        |



|        |   |                          |   |     |   |             |
|--------|---|--------------------------|---|-----|---|-------------|
| 572688 | M | Sidamo Re A Level or l   | 0 | 120 | N | Pass        |
| 572697 | M | South Regi A Level or l  | 0 | 120 | N | Pass        |
| 572698 | F | North Regi A Level or l  | 0 | 120 | N | Withdrawn   |
| 572730 | F | Somalia Re Lower Tha     | 0 | 120 | N | Pass        |
| 572735 | M | Addis Abak Lower Tha     | 0 | 60  | N | Pass        |
| 572751 | M | Somalia Re Lower Tha     | 0 | 120 | N | Fail        |
| 572754 | M | Afar Regio A Level or l  | 0 | 120 | Y | Pass        |
| 572774 | M | Sidamo Re Lower Tha      | 0 | 120 | N | Pass        |
| 572806 | M | South Regi A Level or l  | 0 | 60  | N | Pass        |
| 572854 | F | Oromia Re A Level or l   | 0 | 90  | N | Distinction |
| 572874 | M | Sidamo Re Lower Tha      | 0 | 60  | N | Pass        |
| 572880 | F | South Regi A Level or l  | 0 | 60  | Y | Withdrawn   |
| 572900 | F | Oromia Re A Level or l   | 0 | 60  | N | Withdrawn   |
| 572909 | M | Oromia Re A Level or l   | 0 | 120 | N | Fail        |
| 572949 | M | Oromia Re A Level or l   | 0 | 120 | N | Withdrawn   |
| 572976 | F | Oromia Re A Level or l   | 0 | 60  | N | Pass        |
| 573235 | M | Afar Regio HE Qualific   | 0 | 120 | N | Withdrawn   |
| 573284 | F | Addis Abak A Level or l  | 0 | 210 | N | Withdrawn   |
| 573307 | F | Addis Abak Lower Tha     | 0 | 120 | N | Withdrawn   |
| 573473 | M | South Regi Lower Tha     | 0 | 120 | N | Pass        |
| 573541 | F | South Regi Lower Tha     | 0 | 120 | N | Withdrawn   |
| 573602 | F | South Regi Lower Tha     | 0 | 60  | N | Fail        |
| 573646 | M | Amhara Re A Level or l   | 0 | 120 | N | Withdrawn   |
| 573689 | M | Somalia Re Lower Tha     | 0 | 60  | N | Pass        |
| 573709 | M | Somalia Re HE Qualific   | 0 | 210 | N | Withdrawn   |
| 573712 | F | North Regi Lower Tha     | 0 | 60  | N | Withdrawn   |
| 573780 | M | Afar Regio A Level or l  | 0 | 120 | N | Pass        |
| 573845 | F | South Wes A Level or l   | 0 | 60  | N | Pass        |
| 573970 | F | Amhara Re A Level or l   | 0 | 240 | N | Withdrawn   |
| 574029 | M | North Regi A Level or l  | 0 | 60  | N | Withdrawn   |
| 574035 | M | Tigrai Regi HE Qualific  | 0 | 60  | N | Pass        |
| 574088 | M | South Wes A Level or l   | 0 | 60  | N | Pass        |
| 574098 | F | South Regi Lower Tha     | 0 | 120 | N | Pass        |
| 574099 | M | South Regi Lower Tha     | 0 | 60  | N | Withdrawn   |
| 574181 | F | South Wes Lower Tha      | 0 | 60  | Y | Withdrawn   |
| 574310 | F | Sidamo Re A Level or l   | 0 | 60  | N | Distinction |
| 574330 | F | Sidamo Re A Level or l   | 0 | 60  | N | Withdrawn   |
| 574498 | F | Oromia Re A Level or l   | 0 | 60  | N | Pass        |
| 574529 | F | South Wes A Level or l   | 0 | 120 | N | Fail        |
| 574623 | F | Somalia Re A Level or l  | 0 | 120 | N | Fail        |
| 574627 | M | Addis Abak Lower Tha     | 0 | 60  | N | Withdrawn   |
| 574665 | F | Oromia Re A Level or l   | 0 | 60  | N | Withdrawn   |
| 574705 | M | North Regi Lower Tha     | 0 | 60  | N | Distinction |
| 574720 | M | Amhara Re A Level or l   | 0 | 60  | N | Pass        |
| 574730 | M | Tigrai Regi A Level or l | 0 | 60  | Y | Fail        |
| 574743 | F | South Regi Lower Tha     | 0 | 60  | N | Fail        |
| 574819 | F | South Wes A Level or l   | 0 | 120 | N | Fail        |

|        |   |                         |   |     |   |             |
|--------|---|-------------------------|---|-----|---|-------------|
| 574842 | M | South Regi HE Qualific  | 0 | 60  | N | Pass        |
| 574860 | M | Sidamo Re Lower Thar    | 0 | 60  | N | Withdrawn   |
| 574866 | M | North Regi Lower Thar   | 0 | 60  | N | Withdrawn   |
| 574873 | M | Amhara Re A Level or I  | 0 | 60  | N | Pass        |
| 574895 | F | South Regi HE Qualific  | 0 | 60  | N | Distinction |
| 574938 | M | South Regi A Level or I | 0 | 60  | N | Distinction |
| 575192 | F | Addis Abak A Level or I | 0 | 60  | N | Pass        |
| 575213 | F | Afar Regio Lower Thar   | 0 | 60  | N | Withdrawn   |
| 575258 | M | Addis Abak Lower Thar   | 0 | 60  | N | Pass        |
| 575337 | F | Afar Regio HE Qualific  | 0 | 120 | N | Withdrawn   |
| 575365 | M | Addis Abak HE Qualific  | 0 | 120 | N | Withdrawn   |
| 575376 | F | South Wes HE Qualific   | 0 | 60  | N | Pass        |
| 575385 | M | Afar Regio HE Qualific  | 0 | 120 | N | Distinction |
| 575431 | F | South Wes A Level or I  | 0 | 60  | N | Pass        |
| 575493 | M | Addis Abak A Level or I | 0 | 120 | N | Withdrawn   |
| 575766 | M | South Regi Lower Thar   | 0 | 60  | N | Pass        |
| 575773 | M | Sidamo Re Lower Thar    | 0 | 120 | Y | Withdrawn   |
| 575798 | M | South Wes A Level or I  | 0 | 90  | N | Pass        |
| 575811 | F | Somalia Re Lower Thar   | 0 | 60  | N | Withdrawn   |
| 575855 | M | Sidamo Re HE Qualific   | 0 | 180 | N | Withdrawn   |
| 575962 | M | Amhara Re A Level or I  | 0 | 60  | N | Fail        |
| 575999 | F | Somalia Re A Level or I | 0 | 60  | N | Withdrawn   |
| 576031 | M | Addis Abak A Level or I | 0 | 60  | N | Withdrawn   |
| 576040 | M | South Regi Lower Thar   | 0 | 60  | N | Withdrawn   |
| 576083 | F | South Wes A Level or I  | 0 | 90  | N | Pass        |
| 576131 | M | Addis Abak Lower Thar   | 0 | 120 | N | Withdrawn   |
| 576231 | M | South Regi HE Qualific  | 0 | 60  | N | Withdrawn   |
| 576233 | M | Oromia Re A Level or I  | 0 | 60  | N | Pass        |
| 576251 | M | South Wes A Level or I  | 0 | 75  | N | Distinction |
| 576314 | M | Addis Abak A Level or I | 0 | 120 | N | Fail        |
| 576368 | M | South Regi Lower Thar   | 0 | 60  | N | Fail        |
| 576383 | F | Oromia Re A Level or I  | 0 | 120 | N | Distinction |
| 576413 | M | North Regi A Level or I | 0 | 120 | N | Distinction |
| 576453 | M | Afar Regio HE Qualific  | 0 | 90  | N | Distinction |
| 576492 | M | Afar Regio A Level or I | 0 | 60  | N | Fail        |
| 576767 | M | Addis Abak Lower Thar   | 0 | 120 | N | Pass        |
| 576847 | F | South Wes Lower Thar    | 0 | 60  | N | Distinction |
| 576879 | M | Sidamo Re HE Qualific   | 0 | 120 | N | Fail        |
| 576949 | F | Sidamo Re HE Qualific   | 0 | 90  | N | Pass        |
| 577035 | M | South Regi HE Qualific  | 0 | 90  | N | Distinction |
| 577126 | M | Somalia Re A Level or I | 0 | 60  | N | Pass        |
| 577196 | F | Afar Regio A Level or I | 0 | 120 | Y | Withdrawn   |
| 577200 | M | Amhara Re Lower Thar    | 0 | 90  | N | Fail        |
| 577212 | M | Sidamo Re Lower Thar    | 0 | 90  | N | Fail        |
| 577279 | M | Addis Abak HE Qualific  | 0 | 60  | N | Distinction |
| 577401 | F | South Regi Lower Thar   | 0 | 120 | Y | Withdrawn   |
| 577414 | M | Afar Regio HE Qualific  | 0 | 120 | N | Pass        |

|        |   |                          |   |     |   |             |
|--------|---|--------------------------|---|-----|---|-------------|
| 577464 | M | South Regi A Level or I  | 0 | 60  | Y | Pass        |
| 577558 | M | Somalia Re HE Qualific   | 0 | 60  | N | Withdrawn   |
| 577570 | F | South Regi Lower Thar    | 0 | 60  | N | Withdrawn   |
| 577638 | F | South Regi A Level or I  | 0 | 90  | Y | Withdrawn   |
| 577652 | F | Sidamo Re Lower Thar     | 0 | 90  | N | Withdrawn   |
| 577736 | M | Sidamo Re A Level or I   | 0 | 120 | N | Withdrawn   |
| 577930 | F | Somalia Re A Level or I  | 0 | 60  | N | Withdrawn   |
| 578026 | M | Sidamo Re Lower Thar     | 0 | 60  | N | Fail        |
| 578117 | M | Tigrai Regi Lower Thar   | 0 | 60  | N | Fail        |
| 578150 | M | Somalia Re Lower Thar    | 0 | 120 | N | Withdrawn   |
| 578285 | F | South Regi HE Qualific   | 0 | 60  | N | Withdrawn   |
| 578303 | F | Somalia Re A Level or I  | 0 | 60  | Y | Pass        |
| 578427 | F | South Regi Lower Thar    | 0 | 60  | N | Withdrawn   |
| 578544 | M | South Wes Lower Thar     | 0 | 60  | N | Withdrawn   |
| 578644 | M | Addis Abat A Level or I  | 0 | 90  | N | Pass        |
| 578697 | F | South Regi A Level or I  | 0 | 60  | N | Pass        |
| 578823 | M | Addis Abat A Level or I  | 0 | 180 | N | Pass        |
| 578850 | M | South Regi A Level or I  | 0 | 90  | N | Pass        |
| 578906 | M | South Wes Lower Thar     | 0 | 60  | N | Distinction |
| 578943 | F | South Regi Lower Thar    | 0 | 90  | N | Pass        |
| 578956 | F | Sidamo Re HE Qualific    | 0 | 60  | N | Pass        |
| 579105 | F | Oromia Re A Level or I   | 0 | 90  | N | Distinction |
| 579112 | M | South Regi Lower Thar    | 0 | 60  | N | Fail        |
| 579151 | F | Amhara Re A Level or I   | 0 | 60  | N | Pass        |
| 579303 | M | Afar Regioi Lower Thar   | 0 | 75  | N | Withdrawn   |
| 579325 | M | Amhara Re Lower Thar     | 0 | 60  | N | Pass        |
| 579367 | F | Tigrai Regi HE Qualific  | 0 | 60  | N | Pass        |
| 579372 | M | Sidamo Re Lower Thar     | 0 | 90  | N | Fail        |
| 579470 | M | Afar Regioi A Level or I | 0 | 90  | N | Fail        |
| 579567 | M | South Regi A Level or I  | 0 | 60  | N | Pass        |
| 579717 | F | Afar Regioi A Level or I | 0 | 120 | Y | Pass        |
| 580393 | M | Addis Abat A Level or I  | 0 | 90  | N | Pass        |
| 580415 | F | Amhara Re Lower Thar     | 0 | 120 | N | Distinction |
| 580441 | M | Addis Abat HE Qualific   | 0 | 60  | N | Fail        |
| 580468 | F | Sidamo Re Lower Thar     | 0 | 60  | N | Pass        |
| 580516 | M | Somalia Re A Level or I  | 0 | 180 | N | Pass        |
| 580534 | M | Amhara Re A Level or I   | 0 | 60  | N | Fail        |
| 580595 | M | Addis Abat Lower Thar    | 0 | 120 | N | Withdrawn   |
| 580642 | F | Amhara Re HE Qualific    | 0 | 60  | N | Pass        |
| 580706 | M | South Regi A Level or I  | 0 | 60  | N | Withdrawn   |
| 580714 | M | Sidamo Re A Level or I   | 0 | 60  | N | Distinction |
| 580916 | F | North Regi A Level or I  | 0 | 60  | N | Pass        |
| 581065 | M | Tigrai Regi Lower Thar   | 0 | 120 | N | Withdrawn   |
| 581138 | F | Oromia Re A Level or I   | 0 | 60  | N | Fail        |
| 581283 | F | Sidamo Re A Level or I   | 0 | 60  | N | Withdrawn   |
| 581320 | M | Afar Regioi HE Qualific  | 0 | 120 | N | Withdrawn   |
| 581552 | M | Sidamo Re A Level or I   | 0 | 90  | N | Distinction |

|        |   |                          |   |     |   |           |
|--------|---|--------------------------|---|-----|---|-----------|
| 581584 | F | Oromia Re Lower Tha      | 0 | 240 | N | Withdrawn |
| 581593 | M | Amhara Re HE Qualific    | 0 | 60  | N | Pass      |
| 581648 | F | South Wes A Level or I   | 0 | 180 | N | Withdrawn |
| 581697 | M | South Regi A Level or I  | 0 | 60  | N | Pass      |
| 581755 | F | Addis Abak A Level or I  | 0 | 60  | N | Fail      |
| 581818 | M | Tigrai Regi HE Qualific  | 0 | 90  | N | Withdrawn |
| 581922 | F | South Regi HE Qualific   | 0 | 180 | N | Pass      |
| 582026 | F | Oromia Re Lower Tha      | 0 | 120 | N | Fail      |
| 582160 | F | Addis Abak A Level or I  | 0 | 60  | N | Fail      |
| 582227 | M | Addis Abak Lower Tha     | 0 | 60  | N | Fail      |
| 582288 | F | South Regi Lower Tha     | 0 | 60  | N | Withdrawn |
| 582302 | M | South Regi Lower Tha     | 0 | 60  | N | Fail      |
| 582320 | F | South Regi A Level or I  | 0 | 60  | N | Pass      |
| 582373 | M | Oromia Re A Level or I   | 0 | 60  | N | Withdrawn |
| 582416 | M | North Regi A Level or I  | 0 | 60  | N | Pass      |
| 582452 | F | South Regi A Level or I  | 0 | 60  | N | Pass      |
| 582464 | M | Addis Abak A Level or I  | 0 | 60  | N | Pass      |
| 582554 | M | South Wes Lower Tha      | 0 | 120 | N | Fail      |
| 582848 | M | Sidamo Re A Level or I   | 0 | 60  | N | Withdrawn |
| 582879 | M | Addis Abak Lower Tha     | 0 | 90  | N | Pass      |
| 582931 | M | Sidamo Re Lower Tha      | 0 | 120 | N | Fail      |
| 582954 | M | Sidamo Re Lower Tha      | 0 | 120 | N | Fail      |
| 583037 | M | Sidamo Re Lower Tha      | 0 | 60  | N | Withdrawn |
| 583147 | M | Tigrai Regi Lower Tha    | 0 | 120 | N | Withdrawn |
| 583198 | F | North Regi Lower Tha     | 0 | 195 | N | Pass      |
| 583215 | M | Sidamo Re A Level or I   | 0 | 120 | N | Withdrawn |
| 583221 | F | South Wes A Level or I   | 0 | 120 | Y | Withdrawn |
| 583247 | M | Oromia Re Lower Tha      | 0 | 60  | N | Fail      |
| 583293 | M | Tigrai Regi A Level or I | 0 | 60  | N | Pass      |
| 583335 | M | South Wes Lower Tha      | 0 | 120 | N | Fail      |
| 583438 | F | Sidamo Re A Level or I   | 0 | 300 | N | Withdrawn |
| 583514 | F | South Regi A Level or I  | 0 | 70  | N | Pass      |
| 583540 | M | South Wes A Level or I   | 0 | 60  | N | Pass      |
| 583570 | M | Amhara Re Lower Tha      | 0 | 120 | N | Fail      |
| 583580 | M | South Regi Lower Tha     | 0 | 60  | Y | Fail      |
| 583606 | F | Amhara Re A Level or I   | 0 | 60  | N | Fail      |
| 583775 | M | South Regi Lower Tha     | 0 | 120 | N | Withdrawn |
| 583871 | F | South Wes Lower Tha      | 0 | 60  | N | Pass      |
| 583946 | F | Afar Regioi A Level or I | 0 | 60  | N | Pass      |
| 583955 | F | Afar Regioi Lower Tha    | 0 | 60  | N | Pass      |
| 584077 | M | Amhara Re A Level or I   | 0 | 150 | N | Withdrawn |
| 584082 | F | South Wes Lower Tha      | 0 | 180 | N | Withdrawn |
| 584132 | M | Somalia Re A Level or I  | 0 | 120 | N | Pass      |
| 584183 | M | Oromia Re A Level or I   | 0 | 120 | N | Pass      |
| 584305 | M | Afar Regioi A Level or I | 0 | 150 | N | Withdrawn |
| 584315 | F | Afar Regioi A Level or I | 0 | 120 | N | Fail      |
| 584433 | F | Addis Abak A Level or I  | 0 | 120 | Y | Pass      |

|        |   |                         |   |     |   |             |
|--------|---|-------------------------|---|-----|---|-------------|
| 584455 | F | Sidamo Re, A Level or I | 0 | 90  | N | Withdrawn   |
| 584495 | M | Tigrai Regi HE Qualific | 0 | 60  | N | Pass        |
| 584517 | M | Somalia Re Lower Than   | 0 | 120 | Y | Withdrawn   |
| 584532 | F | South Wes Lower Than    | 0 | 60  | N | Withdrawn   |
| 584586 | M | South Regi A Level or I | 0 | 120 | Y | Fail        |
| 584591 | F | South Wes A Level or I  | 0 | 120 | Y | Withdrawn   |
| 584615 | M | North Regi HE Qualific  | 0 | 120 | N | Withdrawn   |
| 584628 | M | Sidamo Re, Lower Than   | 0 | 120 | N | Withdrawn   |
| 584640 | F | South Regi A Level or I | 0 | 120 | N | Pass        |
| 584883 | F | South Regi A Level or I | 0 | 120 | Y | Withdrawn   |
| 584914 | M | Afar Regio HE Qualific  | 0 | 90  | N | Pass        |
| 584918 | F | Amhara Re A Level or I  | 0 | 120 | N | Fail        |
| 584932 | M | Somalia Re A Level or I | 0 | 60  | N | Fail        |
| 584943 | M | South Regi Lower Than   | 0 | 120 | N | Pass        |
| 585098 | M | South Regi A Level or I | 0 | 60  | N | Pass        |
| 585134 | M | Tigrai Regi HE Qualific | 0 | 60  | N | Pass        |
| 585208 | F | Addis Abak A Level or I | 0 | 60  | Y | Withdrawn   |
| 585210 | M | Sidamo Re, A Level or I | 0 | 60  | Y | Fail        |
| 585326 | F | South Regi A Level or I | 0 | 60  | Y | Pass        |
| 585359 | F | Sidamo Re, A Level or I | 0 | 60  | N | Fail        |
| 585384 | F | Addis Abak Lower Than   | 0 | 210 | N | Withdrawn   |
| 585422 | M | Sidamo Re, A Level or I | 0 | 60  | N | Pass        |
| 585525 | M | South Regi Lower Than   | 0 | 120 | Y | Withdrawn   |
| 585579 | M | Sidamo Re, Lower Than   | 0 | 120 | N | Withdrawn   |
| 585695 | M | South Wes A Level or I  | 0 | 90  | Y | Pass        |
| 585929 | M | Amhara Re A Level or I  | 0 | 120 | N | Withdrawn   |
| 585998 | F | Tigrai Regi Lower Than  | 0 | 60  | N | Withdrawn   |
| 586022 | M | Afar Regio Lower Than   | 0 | 60  | N | Fail        |
| 586113 | F | Amhara Re Lower Than    | 0 | 60  | N | Fail        |
| 586128 | M | Somalia Re HE Qualific  | 0 | 60  | N | Pass        |
| 586243 | F | North Regi A Level or I | 0 | 60  | N | Distinction |
| 586257 | F | South Wes HE Qualific   | 0 | 120 | N | Pass        |
| 586317 | M | Somalia Re Lower Than   | 0 | 60  | N | Withdrawn   |
| 586470 | M | Afar Regio Lower Than   | 0 | 60  | N | Fail        |
| 586497 | M | Somalia Re A Level or I | 0 | 60  | N | Pass        |
| 586526 | M | South Regi A Level or I | 0 | 120 | N | Pass        |
| 586536 | M | Sidamo Re, A Level or I | 0 | 60  | N | Withdrawn   |
| 586550 | M | Sidamo Re, HE Qualific  | 0 | 60  | N | Pass        |
| 586609 | M | North Regi Lower Than   | 0 | 60  | N | Withdrawn   |
| 586625 | M | Oromia Re HE Qualific   | 0 | 60  | N | Fail        |
| 586707 | M | South Regi Lower Than   | 0 | 60  | N | Withdrawn   |
| 586762 | M | Sidamo Re, Lower Than   | 0 | 60  | N | Pass        |
| 586800 | M | Addis Abak HE Qualific  | 0 | 60  | N | Distinction |
| 586823 | M | Oromia Re A Level or I  | 0 | 60  | N | Withdrawn   |
| 586912 | M | Oromia Re Lower Than    | 0 | 120 | N | Pass        |
| 586961 | M | Oromia Re Lower Than    | 0 | 120 | N | Withdrawn   |
| 587002 | F | Amhara Re Lower Than    | 0 | 60  | N | Pass        |

|        |   |                          |   |     |   |             |
|--------|---|--------------------------|---|-----|---|-------------|
| 587006 | M | Afar Region Lower Than   | 0 | 60  | N | Fail        |
| 587099 | F | Addis Abak Lower Than    | 0 | 60  | Y | Withdrawn   |
| 587179 | F | South Regi HE Qualific   | 0 | 120 | N | Withdrawn   |
| 587310 | M | Amhara Re A Level or l   | 0 | 120 | N | Withdrawn   |
| 587552 | F | Amhara Re A Level or l   | 0 | 60  | N | Withdrawn   |
| 587576 | M | North Regi A Level or l  | 0 | 180 | N | Withdrawn   |
| 587641 | M | South Wes A Level or l   | 0 | 60  | N | Pass        |
| 587862 | M | Afar Region A Level or l | 0 | 120 | N | Pass        |
| 587989 | M | South Regi A Level or l  | 0 | 60  | N | Pass        |
| 588013 | F | South Wes HE Qualific    | 0 | 60  | N | Withdrawn   |
| 588033 | M | Sidamo Re A Level or l   | 0 | 60  | N | Pass        |
| 588086 | M | Oromia Re A Level or l   | 0 | 60  | N | Pass        |
| 588132 | F | South Wes A Level or l   | 0 | 60  | N | Pass        |
| 588146 | M | Sidamo Re A Level or l   | 0 | 60  | N | Fail        |
| 588178 | M | South Wes A Level or l   | 0 | 60  | N | Pass        |
| 588197 | M | Afar Region A Level or l | 0 | 60  | N | Withdrawn   |
| 588208 | F | Oromia Re A Level or l   | 0 | 60  | N | Pass        |
| 588219 | M | Oromia Re Lower Than     | 0 | 90  | N | Pass        |
| 588242 | M | South Regi A Level or l  | 0 | 60  | N | Withdrawn   |
| 588293 | M | South Regi Lower Than    | 0 | 60  | N | Pass        |
| 588352 | F | Afar Region HE Qualific  | 0 | 60  | N | Pass        |
| 588430 | M | North Regi Lower Than    | 0 | 90  | N | Pass        |
| 588460 | M | Addis Abak Lower Than    | 0 | 90  | N | Fail        |
| 588482 | M | North Regi A Level or l  | 0 | 60  | N | Distinction |
| 588485 | F | South Wes A Level or l   | 0 | 180 | N | Withdrawn   |
| 588493 | M | Afar Region HE Qualific  | 0 | 60  | N | Pass        |
| 588537 | M | Amhara Re A Level or l   | 0 | 60  | N | Withdrawn   |
| 588540 | F | Sidamo Re A Level or l   | 0 | 60  | N | Distinction |
| 588556 | M | Sidamo Re A Level or l   | 0 | 60  | N | Pass        |
| 588566 | M | Somalia Re A Level or l  | 0 | 60  | N | Pass        |
| 588658 | F | South Wes HE Qualific    | 0 | 120 | N | Withdrawn   |
| 588707 | F | Tigrai Regi A Level or l | 0 | 150 | N | Distinction |
| 588815 | F | South Wes A Level or l   | 0 | 120 | Y | Withdrawn   |
| 588824 | F | Afar Region HE Qualific  | 0 | 60  | Y | Pass        |
| 588850 | M | Addis Abak A Level or l  | 0 | 120 | N | Pass        |
| 588884 | M | South Regi A Level or l  | 0 | 120 | N | Withdrawn   |
| 589007 | F | Sidamo Re A Level or l   | 0 | 60  | N | Withdrawn   |
| 589019 | M | South Regi A Level or l  | 0 | 120 | N | Pass        |
| 589171 | F | Afar Region Lower Than   | 0 | 60  | N | Fail        |
| 589212 | M | South Wes A Level or l   | 0 | 120 | Y | Withdrawn   |
| 589220 | F | Oromia Re HE Qualific    | 0 | 60  | N | Pass        |
| 589445 | M | Oromia Re Lower Than     | 0 | 120 | N | Withdrawn   |
| 589458 | F | South Regi A Level or l  | 0 | 60  | N | Pass        |
| 589503 | F | North Regi Lower Than    | 0 | 60  | N | Pass        |
| 589531 | F | South Regi A Level or l  | 0 | 120 | Y | Pass        |
| 589557 | F | Tigrai Regi A Level or l | 0 | 120 | N | Pass        |
| 589569 | M | Addis Abak Lower Than    | 0 | 120 | N | Withdrawn   |

|        |   |                            |   |     |   |           |
|--------|---|----------------------------|---|-----|---|-----------|
| 589582 | M | Afar Region A Level or I   | 0 | 90  | N | Withdrawn |
| 589584 | M | South Regi A Level or I    | 0 | 60  | N | Fail      |
| 589630 | M | Addis Abak Lower Tha       | 0 | 60  | N | Withdrawn |
| 589723 | F | South Regi A Level or I    | 0 | 60  | N | Pass      |
| 589875 | M | South Regi Lower Tha       | 0 | 60  | N | Pass      |
| 589932 | F | Addis Abak Lower Tha       | 0 | 90  | N | Fail      |
| 589956 | M | South Regi Lower Tha       | 0 | 60  | N | Pass      |
| 589963 | M | Afar Region Lower Tha      | 0 | 180 | N | Withdrawn |
| 590177 | M | South Wes Lower Tha        | 0 | 60  | N | Withdrawn |
| 590184 | M | Amhara Re A Level or I     | 0 | 60  | N | Fail      |
| 590235 | M | Amhara Re A Level or I     | 0 | 60  | N | Withdrawn |
| 590370 | M | South Wes Lower Tha        | 0 | 60  | N | Fail      |
| 590380 | M | Somalia Re A Level or I    | 0 | 60  | Y | Withdrawn |
| 590392 | M | Somalia Re A Level or I    | 0 | 60  | Y | Pass      |
| 590397 | F | South Wes A Level or I     | 0 | 60  | N | Pass      |
| 590402 | M | Sidamo Re A Level or I     | 0 | 60  | N | Fail      |
| 590420 | M | Somalia Re Lower Tha       | 0 | 90  | N | Fail      |
| 590443 | F | South Wes A Level or I     | 0 | 90  | N | Pass      |
| 590464 | M | South Wes A Level or I     | 0 | 60  | N | Withdrawn |
| 590482 | M | North Regi HE Qualific     | 0 | 60  | N | Pass      |
| 590541 | F | Tigrai Region A Level or I | 0 | 120 | N | Withdrawn |
| 590676 | M | Oromia Re No Formal        | 0 | 60  | N | Pass      |
| 590762 | M | Afar Region A Level or I   | 0 | 120 | N | Fail      |
| 590789 | F | North Regi HE Qualific     | 0 | 120 | N | Pass      |
| 590811 | M | South Wes Lower Tha        | 0 | 60  | N | Withdrawn |
| 590828 | F | Oromia Re A Level or I     | 0 | 120 | Y | Withdrawn |
| 590881 | M | Addis Abak Lower Tha       | 0 | 90  | N | Withdrawn |
| 590886 | M | Amhara Re HE Qualific      | 0 | 120 | N | Withdrawn |
| 590918 | M | Amhara Re Lower Tha        | 0 | 120 | N | Fail      |
| 590920 | F | Somalia Re Lower Tha       | 0 | 120 | N | Withdrawn |
| 590921 | F | South Regi A Level or I    | 0 | 90  | N | Fail      |
| 590951 | F | South Wes Lower Tha        | 0 | 60  | N | Fail      |
| 591071 | F | South Regi A Level or I    | 0 | 60  | N | Pass      |
| 591163 | M | Afar Region A Level or I   | 0 | 60  | N | Withdrawn |
| 591193 | M | South Regi Lower Tha       | 0 | 60  | N | Pass      |
| 591202 | F | Somalia Re A Level or I    | 0 | 120 | N | Pass      |
| 591210 | F | Amhara Re A Level or I     | 0 | 120 | N | Pass      |
| 591230 | M | Sidamo Re HE Qualific      | 0 | 60  | N | Pass      |
| 591593 | M | Oromia Re Lower Tha        | 0 | 60  | Y | Pass      |
| 591648 | M | Addis Abak Lower Tha       | 0 | 120 | N | Withdrawn |
| 591650 | M | South Regi Lower Tha       | 0 | 120 | N | Withdrawn |
| 591694 | F | Afar Region HE Qualific    | 0 | 60  | N | Fail      |
| 591845 | F | Sidamo Re Lower Tha        | 0 | 120 | N | Withdrawn |
| 591852 | F | Afar Region A Level or I   | 0 | 120 | Y | Withdrawn |
| 591891 | M | Oromia Re A Level or I     | 0 | 60  | Y | Pass      |
| 591980 | M | Somalia Re HE Qualific     | 0 | 60  | N | Fail      |
| 592093 | M | South Regi Lower Tha       | 0 | 90  | N | Pass      |

|        |   |                          |   |     |   |             |
|--------|---|--------------------------|---|-----|---|-------------|
| 592173 | M | Addis Abat HE Qualific   | 0 | 60  | N | Withdrawn   |
| 592189 | M | Tigrai Regi HE Qualific  | 0 | 60  | N | Pass        |
| 592252 | M | Oromia Re A Level or I   | 0 | 120 | N | Pass        |
| 592284 | F | Amhara Re A Level or I   | 0 | 120 | Y | Fail        |
| 592299 | F | Addis Abat HE Qualific   | 0 | 60  | N | Withdrawn   |
| 592315 | M | Addis Abat Lower Thar    | 0 | 120 | Y | Pass        |
| 592382 | M | South Wes Lower Thar     | 0 | 60  | N | Pass        |
| 592486 | M | Afar Regi Lower Thar     | 0 | 90  | N | Fail        |
| 592494 | F | South Regi A Level or I  | 0 | 90  | N | Pass        |
| 592577 | M | South Regi A Level or I  | 0 | 120 | N | Pass        |
| 592625 | M | Tigrai Regi A Level or I | 0 | 60  | N | Distinction |
| 592658 | M | South Regi Lower Thar    | 0 | 120 | N | Withdrawn   |
| 592709 | M | Sidamo Re A Level or I   | 0 | 60  | N | Fail        |
| 592749 | M | Afar Regi Lower Thar     | 0 | 60  | N | Fail        |
| 592804 | M | Addis Abat A Level or I  | 0 | 60  | N | Withdrawn   |
| 592950 | F | Oromia Re A Level or I   | 0 | 60  | Y | Pass        |
| 593075 | M | South Regi A Level or I  | 0 | 60  | N | Withdrawn   |
| 593103 | M | Amhara Re A Level or I   | 0 | 120 | N | Pass        |
| 593303 | M | Afar Regi Lower Thar     | 0 | 60  | N | Fail        |
| 593338 | M | Somalia Re Lower Thar    | 0 | 60  | N | Pass        |
| 593345 | F | Sidamo Re A Level or I   | 0 | 240 | N | Withdrawn   |
| 593475 | M | Tigrai Regi Lower Thar   | 0 | 150 | N | Withdrawn   |
| 593594 | M | South Wes Lower Thar     | 0 | 90  | N | Withdrawn   |
| 593654 | F | Addis Abat A Level or I  | 0 | 60  | N | Pass        |
| 593903 | M | South Regi A Level or I  | 0 | 120 | N | Fail        |
| 593973 | M | South Regi Lower Thar    | 0 | 90  | N | Pass        |
| 594011 | F | Sidamo Re A Level or I   | 0 | 90  | N | Pass        |
| 594052 | M | Amhara Re A Level or I   | 0 | 90  | N | Pass        |
| 594079 | M | Sidamo Re Lower Thar     | 0 | 60  | N | Withdrawn   |
| 594081 | M | South Wes A Level or I   | 0 | 120 | N | Withdrawn   |
| 594086 | M | Tigrai Regi A Level or I | 0 | 120 | N | Fail        |
| 594164 | F | Amhara Re HE Qualific    | 0 | 120 | Y | Withdrawn   |
| 594201 | F | North Regi No Formal     | 0 | 120 | N | Pass        |
| 594407 | F | Oromia Re A Level or I   | 0 | 120 | N | Withdrawn   |
| 594414 | M | South Regi Lower Thar    | 0 | 120 | N | Withdrawn   |
| 594419 | F | Amhara Re Lower Thar     | 0 | 90  | N | Pass        |
| 594507 | M | South Regi Lower Thar    | 0 | 60  | N | Pass        |
| 594578 | M | Addis Abat A Level or I  | 0 | 60  | N | Fail        |
| 594599 | F | North Regi Lower Thar    | 0 | 60  | N | Withdrawn   |
| 594869 | F | Amhara Re A Level or I   | 0 | 60  | N | Fail        |
| 594880 | F | Oromia Re A Level or I   | 0 | 90  | N | Withdrawn   |
| 594925 | F | South Wes Lower Thar     | 0 | 60  | N | Pass        |
| 594963 | F | Tigrai Regi A Level or I | 0 | 60  | N | Pass        |
| 595008 | M | Amhara Re A Level or I   | 0 | 60  | N | Withdrawn   |
| 595079 | F | Afar Regi A Level or I   | 0 | 90  | N | Pass        |
| 595319 | M | Amhara Re A Level or I   | 0 | 120 | N | Distinction |
| 595396 | F | South Regi A Level or I  | 0 | 120 | N | Withdrawn   |



|        |   |                         |   |     |   |             |
|--------|---|-------------------------|---|-----|---|-------------|
| 595495 | M | Addis Abat A Level or   | 0 | 60  | Y | Pass        |
| 595601 | F | Tigrai Regi A Level or  | 0 | 60  | N | Fail        |
| 595659 | M | Sidamo Re A Level or    | 0 | 90  | N | Pass        |
| 595685 | M | Somalia Re A Level or   | 0 | 120 | N | Pass        |
| 595687 | M | Afar Regio A Level or   | 0 | 60  | N | Pass        |
| 595720 | F | South Wes A Level or    | 0 | 210 | N | Withdrawn   |
| 595723 | M | South Regi Lower Tha    | 0 | 60  | N | Fail        |
| 595894 | F | Sidamo Re A Level or    | 0 | 120 | N | Withdrawn   |
| 595940 | F | Tigrai Regi HE Qualific | 0 | 120 | N | Fail        |
| 595963 | F | North Regi A Level or   | 0 | 60  | N | Withdrawn   |
| 595986 | M | South Wes A Level or    | 0 | 120 | N | Pass        |
| 595988 | F | Sidamo Re A Level or    | 0 | 90  | N | Pass        |
| 596093 | M | Addis Abat A Level or   | 0 | 60  | N | Pass        |
| 596104 | F | South Wes Lower Tha     | 0 | 60  | N | Fail        |
| 596204 | M | Addis Abat A Level or   | 0 | 60  | N | Fail        |
| 596270 | F | Afar Regio HE Qualific  | 0 | 60  | N | Pass        |
| 596292 | M | South Regi Lower Tha    | 0 | 120 | N | Withdrawn   |
| 596306 | M | South Regi A Level or   | 0 | 60  | N | Fail        |
| 596441 | M | South Regi A Level or   | 0 | 60  | N | Pass        |
| 596473 | F | Afar Regio HE Qualific  | 0 | 60  | N | Fail        |
| 596542 | M | South Regi Lower Tha    | 0 | 60  | Y | Fail        |
| 596570 | M | Afar Regio A Level or   | 0 | 60  | N | Pass        |
| 596589 | M | Afar Regio Lower Tha    | 0 | 90  | N | Fail        |
| 596620 | F | Somalia Re Lower Tha    | 1 | 60  | Y | Withdrawn   |
| 596629 | M | Tigrai Regi HE Qualific | 0 | 60  | N | Fail        |
| 596731 | M | Sidamo Re A Level or    | 0 | 90  | N | Pass        |
| 596845 | M | Addis Abat A Level or   | 0 | 60  | N | Pass        |
| 596846 | M | South Wes A Level or    | 0 | 90  | N | Distinction |
| 596978 | F | Sidamo Re A Level or    | 0 | 180 | N | Withdrawn   |
| 597178 | M | South Wes Lower Tha     | 0 | 60  | N | Withdrawn   |
| 597192 | M | Sidamo Re A Level or    | 0 | 150 | Y | Withdrawn   |
| 597235 | F | Sidamo Re A Level or    | 0 | 120 | N | Fail        |
| 597243 | M | Addis Abat A Level or   | 0 | 60  | N | Pass        |
| 597308 | M | South Wes A Level or    | 0 | 90  | N | Withdrawn   |
| 597365 | M | Amhara Re A Level or    | 0 | 60  | N | Pass        |
| 597403 | M | Amhara Re A Level or    | 0 | 90  | N | Pass        |
| 597428 | M | Afar Regio HE Qualific  | 0 | 60  | N | Pass        |
| 597433 | F | South Regi A Level or   | 0 | 60  | N | Pass        |
| 597443 | M | Afar Regio Lower Tha    | 0 | 60  | N | Fail        |
| 597453 | M | South Wes A Level or    | 0 | 60  | N | Withdrawn   |
| 597504 | F | Somalia Re A Level or   | 0 | 90  | N | Withdrawn   |
| 597560 | M | Somalia Re Lower Tha    | 0 | 120 | N | Pass        |
| 597561 | M | Afar Regio A Level or   | 0 | 90  | N | Withdrawn   |
| 597571 | M | South Regi Lower Tha    | 0 | 120 | N | Pass        |
| 597602 | M | Addis Abat A Level or   | 0 | 60  | N | Pass        |
| 597726 | M | Sidamo Re No Formal     | 0 | 60  | N | Fail        |
| 597754 | F | South Regi Lower Tha    | 0 | 90  | N | Withdrawn   |

|        |   |                                             |   |     |   |             |
|--------|---|---------------------------------------------|---|-----|---|-------------|
| 597755 | M | Tigray Region A Level or Higher             | 0 | 60  | N | Pass        |
| 597770 | F | South Region Lower Than A Level or Higher   | 0 | 130 | Y | Pass        |
| 597871 | M | Addis Ababa HE Qualification                | 0 | 90  | N | Pass        |
| 597924 | M | Sidamo Region A Level or Higher             | 0 | 60  | N | Withdrawn   |
| 597938 | F | Amhara Region A Level or Higher             | 0 | 60  | N | Distinction |
| 597968 | M | Oromia Region A Level or Higher             | 0 | 60  | N | Pass        |
| 598052 | M | Oromia Region HE Qualification              | 0 | 60  | N | Pass        |
| 598064 | M | Afar Region A Level or Higher               | 0 | 60  | N | Pass        |
| 598089 | F | South Region Lower Than A Level or Higher   | 0 | 60  | N | Withdrawn   |
| 598123 | M | South Region A Level or Higher              | 0 | 120 | Y | Withdrawn   |
| 598246 | F | Amhara Region A Level or Higher             | 0 | 120 | N | Distinction |
| 598323 | F | Afar Region A Level or Higher               | 0 | 60  | N | Withdrawn   |
| 598430 | M | North Region Post Graduate                  | 0 | 120 | N | Withdrawn   |
| 598501 | M | South West A Level or Higher                | 0 | 60  | N | Pass        |
| 598516 | M | Amhara Region A Level or Higher             | 0 | 120 | N | Pass        |
| 598536 | F | Somalia Region A Level or Higher            | 0 | 60  | N | Withdrawn   |
| 598637 | F | Amhara Region HE Qualification              | 0 | 60  | N | Distinction |
| 598650 | F | Sidamo Region A Level or Higher             | 0 | 60  | N | Fail        |
| 598664 | M | Sidamo Region HE Qualification              | 0 | 60  | N | Pass        |
| 598665 | M | South Region Lower Than A Level or Higher   | 0 | 60  | N | Distinction |
| 598701 | M | Afar Region HE Qualification                | 0 | 60  | N | Fail        |
| 598842 | M | Amhara Region Lower Than A Level or Higher  | 0 | 120 | N | Fail        |
| 598860 | F | Sidamo Region Lower Than A Level or Higher  | 0 | 90  | N | Pass        |
| 598949 | M | Somalia Region Lower Than A Level or Higher | 0 | 120 | N | Withdrawn   |
| 598989 | M | Amhara Region A Level or Higher             | 0 | 60  | N | Pass        |
| 599049 | F | North Region Lower Than A Level or Higher   | 0 | 120 | N | Pass        |
| 599068 | M | Somalia Region HE Qualification             | 0 | 60  | N | Pass        |
| 599101 | F | Sidamo Region Lower Than A Level or Higher  | 0 | 60  | N | Withdrawn   |
| 599109 | M | Oromia Region A Level or Higher             | 0 | 60  | N | Pass        |
| 599146 | M | Oromia Region Lower Than A Level or Higher  | 0 | 90  | N | Pass        |
| 599169 | M | Afar Region A Level or Higher               | 0 | 60  | Y | Pass        |
| 599177 | M | South Region Lower Than A Level or Higher   | 0 | 120 | N | Pass        |
| 599206 | M | Somalia Region Lower Than A Level or Higher | 0 | 60  | N | Fail        |
| 599262 | M | Sidamo Region Lower Than A Level or Higher  | 0 | 60  | N | Withdrawn   |
| 599314 | M | South West Lower Than A Level or Higher     | 0 | 60  | N | Pass        |
| 599406 | M | Addis Ababa Lower Than A Level or Higher    | 0 | 120 | N | Withdrawn   |
| 599425 | M | Amhara Region HE Qualification              | 0 | 150 | N | Pass        |
| 599577 | F | South Region A Level or Higher              | 0 | 60  | N | Pass        |
| 599585 | M | Tigray Region HE Qualification              | 0 | 60  | N | Pass        |
| 599615 | M | Somalia Region Lower Than A Level or Higher | 0 | 90  | Y | Withdrawn   |
| 599649 | M | Somalia Region HE Qualification             | 0 | 150 | N | Withdrawn   |
| 599655 | M | Addis Ababa Lower Than A Level or Higher    | 0 | 120 | N | Fail        |
| 599658 | M | Afar Region A Level or Higher               | 0 | 60  | N | Fail        |
| 599711 | M | South Region Lower Than A Level or Higher   | 0 | 60  | N | Withdrawn   |
| 599725 | F | Amhara Region A Level or Higher             | 0 | 120 | Y | Pass        |
| 599737 | F | Afar Region HE Qualification                | 0 | 60  | N | Pass        |
| 599741 | M | South Region Lower Than A Level or Higher   | 0 | 60  | Y | Withdrawn   |

|        |   |                          |   |     |   |             |
|--------|---|--------------------------|---|-----|---|-------------|
| 599742 | F | South Wes A Level or I   | 0 | 60  | N | Withdrawn   |
| 599837 | F | Afar Region A Level or I | 0 | 120 | Y | Withdrawn   |
| 599854 | F | South Regi A Level or I  | 0 | 120 | N | Pass        |
| 599876 | F | Amhara Re A Level or I   | 0 | 120 | N | Withdrawn   |
| 599947 | M | South Regi A Level or I  | 0 | 120 | N | Pass        |
| 600067 | M | Addis Abak A Level or I  | 0 | 60  | N | Pass        |
| 600094 | M | Amhara Re A Level or I   | 0 | 90  | N | Withdrawn   |
| 600242 | F | Sidamo Re Lower Than     | 0 | 60  | N | Pass        |
| 600289 | M | North Regi Lower Than    | 0 | 90  | N | Withdrawn   |
| 600365 | M | South Regi Lower Than    | 0 | 60  | N | Pass        |
| 600478 | M | Oromia Re Lower Than     | 0 | 60  | N | Pass        |
| 600525 | F | North Regi Lower Than    | 0 | 120 | N | Withdrawn   |
| 600635 | F | South Regi A Level or I  | 0 | 120 | N | Pass        |
| 600648 | M | Somalia Re Lower Than    | 0 | 60  | N | Withdrawn   |
| 600671 | M | South Regi Lower Than    | 0 | 120 | N | Distinction |
| 600686 | M | South Regi HE Qualific   | 0 | 60  | N | Pass        |
| 600753 | F | South Regi A Level or I  | 0 | 180 | N | Withdrawn   |
| 600796 | F | South Wes Lower Than     | 0 | 60  | N | Pass        |
| 600817 | F | North Regi Lower Than    | 0 | 60  | N | Distinction |
| 600842 | M | Amhara Re A Level or I   | 0 | 60  | N | Withdrawn   |
| 600859 | M | Afar Region HE Qualific  | 0 | 90  | N | Withdrawn   |
| 600963 | M | South Regi Lower Than    | 0 | 120 | N | Withdrawn   |
| 601048 | F | Amhara Re A Level or I   | 0 | 60  | N | Fail        |
| 601088 | F | South Wes Lower Than     | 0 | 90  | N | Fail        |
| 601092 | M | South Regi A Level or I  | 0 | 60  | N | Pass        |
| 601133 | M | Oromia Re A Level or I   | 0 | 60  | N | Fail        |
| 601204 | M | North Regi A Level or I  | 0 | 60  | N | Withdrawn   |
| 601230 | M | South Regi Lower Than    | 0 | 120 | N | Pass        |
| 601234 | M | Amhara Re A Level or I   | 0 | 60  | N | Pass        |
| 601263 | M | Addis Abak Lower Than    | 0 | 60  | N | Pass        |
| 601270 | F | Afar Region Lower Than   | 0 | 120 | N | Withdrawn   |
| 601286 | M | Addis Abak A Level or I  | 0 | 60  | N | Withdrawn   |
| 601289 | F | North Regi HE Qualific   | 0 | 60  | N | Withdrawn   |
| 601293 | F | Sidamo Re A Level or I   | 0 | 90  | Y | Pass        |
| 601310 | M | South Wes Lower Than     | 0 | 60  | N | Fail        |
| 601380 | F | Sidamo Re A Level or I   | 0 | 120 | N | Pass        |
| 601392 | M | Somalia Re A Level or I  | 0 | 60  | N | Withdrawn   |
| 601467 | F | Addis Abak Lower Than    | 0 | 90  | N | Fail        |
| 601488 | M | Amhara Re Lower Than     | 0 | 60  | N | Withdrawn   |
| 601566 | M | Amhara Re A Level or I   | 0 | 60  | N | Pass        |
| 601579 | F | Oromia Re A Level or I   | 0 | 90  | N | Pass        |
| 601731 | M | Sidamo Re A Level or I   | 0 | 210 | N | Withdrawn   |
| 601857 | F | South Regi Lower Than    | 0 | 150 | Y | Pass        |
| 602302 | F | North Regi Lower Than    | 0 | 60  | N | Pass        |
| 602312 | M | Sidamo Re A Level or I   | 0 | 120 | Y | Withdrawn   |
| 602356 | F | Tigray Regi A Level or I | 0 | 60  | N | Pass        |
| 602404 | F | Oromia Re A Level or I   | 0 | 60  | Y | Pass        |

|        |   |                          |   |     |   |             |
|--------|---|--------------------------|---|-----|---|-------------|
| 602413 | M | Amhara Re HE Qualific    | 0 | 90  | N | Withdrawn   |
| 602452 | M | South Regi Lower Thar    | 0 | 60  | N | Withdrawn   |
| 602453 | F | South Wes A Level or I   | 0 | 120 | N | Withdrawn   |
| 602595 | F | South Regi A Level or I  | 0 | 60  | N | Pass        |
| 602692 | F | Sidamo Re A Level or I   | 0 | 120 | Y | Withdrawn   |
| 602706 | M | Oromia Re Lower Thar     | 0 | 60  | N | Withdrawn   |
| 602725 | M | Amhara Re Lower Thar     | 0 | 120 | N | Fail        |
| 602729 | M | Sidamo Re A Level or I   | 0 | 60  | N | Fail        |
| 602783 | M | South Regi A Level or I  | 0 | 60  | N | Pass        |
| 602856 | F | Addis Abak HE Qualific   | 0 | 60  | N | Distinction |
| 602902 | F | Sidamo Re Lower Thar     | 0 | 90  | N | Pass        |
| 602986 | M | Afar Regio A Level or I  | 0 | 120 | N | Fail        |
| 603034 | M | Oromia Re HE Qualific    | 0 | 60  | N | Pass        |
| 603049 | M | Afar Regio HE Qualific   | 0 | 60  | N | Pass        |
| 603201 | M | South Wes A Level or I   | 0 | 60  | N | Withdrawn   |
| 603302 | M | South Wes A Level or I   | 0 | 120 | Y | Withdrawn   |
| 603325 | F | Oromia Re A Level or I   | 0 | 60  | Y | Distinction |
| 603410 | M | Sidamo Re A Level or I   | 0 | 60  | N | Fail        |
| 603431 | M | Somalia Re A Level or I  | 0 | 60  | Y | Pass        |
| 603469 | F | Tigrai Regi HE Qualific  | 0 | 180 | N | Fail        |
| 603498 | M | Sidamo Re A Level or I   | 0 | 90  | N | Fail        |
| 603513 | F | Oromia Re HE Qualific    | 0 | 60  | N | Pass        |
| 603669 | M | Addis Abak A Level or I  | 0 | 120 | N | Withdrawn   |
| 603684 | M | Amhara Re Lower Thar     | 0 | 60  | N | Withdrawn   |
| 603730 | F | Addis Abak A Level or I  | 0 | 120 | N | Fail        |
| 603749 | M | Oromia Re A Level or I   | 0 | 60  | N | Withdrawn   |
| 603803 | M | Somalia Re A Level or I  | 0 | 120 | N | Withdrawn   |
| 603850 | M | Afar Regio Lower Thar    | 0 | 60  | N | Withdrawn   |
| 603931 | M | North Regi Lower Thar    | 0 | 120 | N | Withdrawn   |
| 603953 | F | North Regi A Level or I  | 0 | 120 | N | Withdrawn   |
| 604055 | M | Amhara Re A Level or I   | 0 | 120 | N | Pass        |
| 604072 | F | South Regi A Level or I  | 0 | 120 | N | Pass        |
| 604156 | M | Sidamo Re A Level or I   | 0 | 60  | N | Pass        |
| 604281 | F | Sidamo Re HE Qualific    | 0 | 60  | N | Distinction |
| 604317 | M | Amhara Re HE Qualific    | 0 | 60  | N | Pass        |
| 604392 | F | Addis Abak A Level or I  | 0 | 60  | N | Withdrawn   |
| 604398 | F | North Regi No Formal     | 0 | 180 | N | Withdrawn   |
| 604462 | M | Amhara Re Lower Thar     | 0 | 90  | N | Fail        |
| 604546 | M | Addis Abak Lower Thar    | 0 | 60  | Y | Withdrawn   |
| 604559 | M | Sidamo Re A Level or I   | 0 | 90  | N | Fail        |
| 604574 | M | Tigrai Regi A Level or I | 0 | 60  | N | Withdrawn   |
| 604627 | M | Oromia Re A Level or I   | 0 | 90  | N | Pass        |
| 604641 | M | Amhara Re A Level or I   | 0 | 60  | N | Fail        |
| 604655 | M | Tigrai Regi A Level or I | 0 | 90  | Y | Withdrawn   |
| 604692 | F | Oromia Re Lower Thar     | 0 | 120 | N | Withdrawn   |
| 604723 | M | South Regi A Level or I  | 0 | 90  | N | Pass        |
| 604729 | M | South Regi A Level or I  | 0 | 60  | N | Withdrawn   |

|        |   |                         |   |     |   |             |
|--------|---|-------------------------|---|-----|---|-------------|
| 604854 | F | Somalia Re A Level or I | 0 | 90  | N | Pass        |
| 604912 | M | Addis Abak Lower Tha    | 0 | 90  | Y | Withdrawn   |
| 604952 | F | Amhara Re Lower Tha     | 0 | 120 | N | Withdrawn   |
| 605005 | M | South Regi Lower Tha    | 0 | 60  | N | Withdrawn   |
| 605070 | M | North Regi A Level or I | 0 | 120 | N | Fail        |
| 605105 | M | Amhara Re Lower Tha     | 0 | 90  | Y | Fail        |
| 605118 | F | Amhara Re Lower Tha     | 0 | 60  | N | Fail        |
| 605144 | M | Afar Regio HE Qualific  | 0 | 90  | N | Pass        |
| 605191 | M | Oromia Re A Level or I  | 0 | 60  | N | Fail        |
| 605245 | F | Afar Regio HE Qualific  | 0 | 60  | N | Fail        |
| 605266 | F | Sidamo Re A Level or I  | 0 | 90  | N | Pass        |
| 605313 | M | North Regi A Level or I | 0 | 60  | N | Withdrawn   |
| 605476 | M | South Regi A Level or I | 0 | 120 | N | Pass        |
| 605540 | M | Sidamo Re A Level or I  | 0 | 90  | Y | Distinction |
| 605561 | M | Afar Regio Lower Tha    | 0 | 60  | N | Fail        |
| 605652 | F | South Regi A Level or I | 0 | 180 | N | Withdrawn   |
| 605703 | M | Sidamo Re A Level or I  | 0 | 90  | N | Pass        |
| 605859 | M | Addis Abak Lower Tha    | 0 | 90  | N | Withdrawn   |
| 605885 | M | South Wes HE Qualific   | 0 | 70  | N | Withdrawn   |
| 605941 | F | South Wes Lower Tha     | 0 | 90  | Y | Pass        |
| 606082 | M | South Wes Lower Tha     | 0 | 120 | N | Pass        |
| 606270 | M | Sidamo Re Lower Tha     | 0 | 60  | N | Fail        |
| 606319 | F | South Regi Lower Tha    | 0 | 90  | N | Pass        |
| 606322 | M | Oromia Re A Level or I  | 0 | 60  | N | Pass        |
| 606344 | M | Sidamo Re A Level or I  | 0 | 60  | N | Pass        |
| 606492 | F | Oromia Re Lower Tha     | 0 | 60  | N | Fail        |
| 606513 | M | South Regi Lower Tha    | 0 | 60  | Y | Withdrawn   |
| 606593 | M | Afar Regio A Level or I | 0 | 120 | N | Withdrawn   |
| 606665 | M | Amhara Re A Level or I  | 0 | 90  | N | Pass        |
| 606719 | F | South Regi HE Qualific  | 0 | 60  | N | Withdrawn   |
| 606788 | F | Sidamo Re HE Qualific   | 0 | 90  | Y | Distinction |
| 606908 | M | Sidamo Re Lower Tha     | 0 | 60  | Y | Pass        |
| 607061 | M | Afar Regio A Level or I | 0 | 90  | N | Distinction |
| 607073 | F | North Regi Post Gradu   | 0 | 60  | N | Pass        |
| 607110 | M | South Regi A Level or I | 0 | 120 | N | Withdrawn   |
| 607151 | F | Afar Regio A Level or I | 0 | 60  | N | Distinction |
| 607196 | M | Addis Abak A Level or I | 0 | 60  | N | Pass        |
| 607231 | M | South Regi A Level or I | 0 | 90  | N | Fail        |
| 607316 | F | Afar Regio Lower Tha    | 0 | 60  | N | Pass        |
| 607427 | F | South Wes Lower Tha     | 0 | 150 | Y | Withdrawn   |
| 607485 | M | Afar Regio A Level or I | 0 | 60  | Y | Pass        |
| 607498 | F | North Regi A Level or I | 0 | 90  | N | Fail        |
| 607515 | M | Amhara Re Lower Tha     | 0 | 120 | N | Withdrawn   |
| 607555 | M | Afar Regio HE Qualific  | 0 | 60  | N | Pass        |
| 607622 | M | Afar Regio A Level or I | 0 | 60  | N | Fail        |
| 607670 | M | Afar Regio A Level or I | 0 | 60  | N | Fail        |
| 607800 | F | Sidamo Re HE Qualific   | 0 | 60  | N | Distinction |

|        |   |                          |   |     |   |             |
|--------|---|--------------------------|---|-----|---|-------------|
| 607854 | F | South Wes HE Qualific    | 0 | 90  | N | Fail        |
| 607900 | M | Oromia Re A Level or I   | 0 | 60  | N | Distinction |
| 607927 | F | Amhara Re Lower Than     | 0 | 120 | N | Pass        |
| 607928 | F | Sidamo Re A Level or I   | 0 | 120 | N | Withdrawn   |
| 607966 | F | North Regi A Level or I  | 0 | 90  | N | Withdrawn   |
| 608062 | M | South Regi A Level or I  | 0 | 60  | Y | Pass        |
| 608170 | M | Oromia Re A Level or I   | 0 | 60  | N | Withdrawn   |
| 608178 | F | South Wes Lower Than     | 0 | 60  | N | Fail        |
| 608206 | M | South Wes A Level or I   | 0 | 120 | N | Withdrawn   |
| 608217 | F | Oromia Re HE Qualific    | 0 | 60  | N | Pass        |
| 608238 | M | North Regi Lower Than    | 0 | 120 | N | Distinction |
| 608267 | M | South Wes A Level or I   | 0 | 60  | N | Pass        |
| 608284 | M | South Regi A Level or I  | 0 | 120 | N | Fail        |
| 608417 | F | South Regi A Level or I  | 0 | 60  | N | Pass        |
| 608449 | M | Afar Regioi A Level or I | 0 | 60  | N | Pass        |
| 608630 | M | Sidamo Re A Level or I   | 0 | 120 | N | Fail        |
| 608638 | M | South Regi A Level or I  | 0 | 60  | N | Withdrawn   |
| 608643 | M | North Regi HE Qualific   | 0 | 120 | N | Pass        |
| 608733 | M | Addis Abak Lower Than    | 0 | 90  | N | Pass        |
| 608745 | M | Afar Regioi HE Qualific  | 0 | 60  | N | Pass        |
| 608815 | F | Afar Regioi A Level or I | 0 | 60  | N | Pass        |
| 608848 | F | Amhara Re A Level or I   | 0 | 120 | N | Withdrawn   |
| 608923 | M | Addis Abak Lower Than    | 0 | 120 | N | Pass        |
| 608943 | F | South Wes Lower Than     | 0 | 120 | Y | Withdrawn   |
| 608983 | F | Tigrai Regio HE Qualific | 0 | 90  | N | Pass        |
| 609031 | F | Addis Abak Lower Than    | 0 | 90  | N | Distinction |
| 609044 | M | Sidamo Re A Level or I   | 0 | 120 | N | Fail        |
| 609089 | M | South Wes Lower Than     | 0 | 120 | N | Withdrawn   |
| 609242 | M | Amhara Re Lower Than     | 0 | 60  | N | Fail        |
| 609381 | F | Sidamo Re A Level or I   | 0 | 60  | N | Withdrawn   |
| 609480 | F | Oromia Re A Level or I   | 0 | 60  | N | Fail        |
| 609488 | F | South Wes A Level or I   | 0 | 60  | N | Fail        |
| 609593 | M | North Regi HE Qualific   | 0 | 60  | N | Pass        |
| 609797 | F | South Wes A Level or I   | 0 | 60  | Y | Withdrawn   |
| 609932 | F | South Regi A Level or I  | 0 | 60  | N | Pass        |
| 609969 | M | North Regi Lower Than    | 0 | 60  | N | Pass        |
| 610019 | M | Sidamo Re A Level or I   | 0 | 60  | N | Pass        |
| 610106 | F | South Regi A Level or I  | 0 | 90  | Y | Withdrawn   |
| 610170 | M | South Regi Lower Than    | 0 | 120 | N | Withdrawn   |
| 610220 | F | Sidamo Re A Level or I   | 0 | 120 | N | Pass        |
| 610257 | M | South Wes Post Gradu     | 0 | 70  | N | Pass        |
| 610279 | M | South Regi A Level or I  | 0 | 60  | N | Pass        |
| 610393 | M | North Regi A Level or I  | 0 | 90  | N | Fail        |
| 610402 | M | Tigrai Regio HE Qualific | 0 | 60  | N | Withdrawn   |
| 610469 | F | North Regi Post Gradu    | 0 | 60  | N | Withdrawn   |
| 610537 | M | Amhara Re A Level or I   | 0 | 60  | N | Fail        |
| 610595 | F | North Regi A Level or I  | 0 | 90  | N | Pass        |

|         |   |                         |   |     |   |             |
|---------|---|-------------------------|---|-----|---|-------------|
| 610603  | F | North Regi A Level or I | 0 | 60  | Y | Pass        |
| 610606  | M | South Regi HE Qualific  | 0 | 60  | N | Withdrawn   |
| 610701  | F | Sidamo Re HE Qualific   | 0 | 120 | N | Fail        |
| 610817  | F | Tigrai Regi Lower Than  | 0 | 60  | N | Withdrawn   |
| 610830  | F | Tigrai Regi Lower Than  | 0 | 60  | N | Withdrawn   |
| 610834  | M | Amhara Re A Level or I  | 0 | 60  | N | Withdrawn   |
| 610838  | F | Tigrai Regi Lower Than  | 0 | 60  | N | Withdrawn   |
| 610870  | F | South Regi A Level or I | 0 | 90  | N | Pass        |
| 610913  | F | Amhara Re Lower Than    | 0 | 60  | N | Withdrawn   |
| 611162  | F | South Wes Lower Than    | 0 | 120 | N | Pass        |
| 611244  | M | South Wes A Level or I  | 0 | 60  | N | Fail        |
| 611259  | F | North Regi Lower Than   | 0 | 60  | N | Pass        |
| 611271  | M | Tigrai Regi Lower Than  | 0 | 60  | N | Fail        |
| 611284  | M | South Regi Lower Than   | 0 | 90  | N | Distinction |
| 611408  | M | South Regi A Level or I | 0 | 120 | N | Pass        |
| 611418  | M | South Wes A Level or I  | 0 | 60  | N | Fail        |
| 611464  | F | South Regi A Level or I | 0 | 240 | N | Pass        |
| 611478  | F | Oromia Re A Level or I  | 0 | 60  | N | Distinction |
| 611593  | M | South Regi Post Gradu   | 0 | 60  | N | Pass        |
| 835603  | M | Amhara Re HE Qualific   | 0 | 150 | N | Withdrawn   |
| 925553  | M | Sidamo Re HE Qualific   | 1 | 120 | N | Withdrawn   |
| 983970  | M | Somalia Re HE Qualific  | 0 | 90  | N | Pass        |
| 997948  | M | Amhara Re A Level or I  | 0 | 120 | N | Withdrawn   |
| 1080206 | F | Afar Regio HE Qualific  | 0 | 60  | N | Pass        |
| 1103608 | F | South Wes HE Qualific   | 0 | 60  | N | Pass        |
| 1187586 | M | Afar Regio HE Qualific  | 0 | 90  | N | Pass        |
| 1282596 | M | South Regi HE Qualific  | 4 | 60  | N | Fail        |
| 1345808 | F | Afar Regio HE Qualific  | 0 | 60  | N | Pass        |
| 1346966 | M | North Regi HE Qualific  | 0 | 60  | N | Withdrawn   |
| 1355699 | M | South Regi HE Qualific  | 2 | 60  | N | Pass        |
| 1375851 | M | Sidamo Re HE Qualific   | 0 | 150 | N | Pass        |
| 1440467 | M | Addis Abat A Level or I | 0 | 90  | N | Pass        |
| 1442991 | M | Afar Regio HE Qualific  | 0 | 210 | N | Pass        |
| 1449692 | M | South Regi Lower Than   | 0 | 120 | N | Pass        |
| 1464932 | F | Somalia Re Lower Than   | 0 | 60  | N | Withdrawn   |
| 1485105 | M | Tigrai Regi Lower Than  | 2 | 60  | N | Fail        |
| 1497480 | F | Afar Regio A Level or I | 0 | 60  | N | Fail        |
| 1507503 | F | Addis Abat A Level or I | 0 | 60  | Y | Pass        |
| 1509881 | F | Afar Regio A Level or I | 0 | 60  | Y | Fail        |
| 1517755 | M | South Regi A Level or I | 0 | 60  | N | Withdrawn   |
| 1522631 | F | Addis Abat A Level or I | 0 | 90  | N | Fail        |
| 1530521 | M | Somalia Re Lower Than   | 0 | 60  | N | Pass        |
| 1563203 | M | Sidamo Re HE Qualific   | 1 | 60  | N | Fail        |
| 1564630 | F | Somalia Re Lower Than   | 0 | 60  | N | Pass        |
| 1569426 | M | South Wes A Level or I  | 0 | 60  | N | Pass        |
| 1580084 | F | Amhara Re A Level or I  | 0 | 60  | N | Fail        |
| 1581243 | M | Somalia Re A Level or I | 0 | 60  | N | Pass        |

|         |   |                                  |   |     |   |             |
|---------|---|----------------------------------|---|-----|---|-------------|
| 1592048 | M | Tigrai Region HE Qualification   | 0 | 120 | N | Withdrawn   |
| 1610188 | M | Somalia Region Lower Than        | 1 | 90  | N | Fail        |
| 1644266 | F | South Region Lower Than          | 0 | 60  | N | Withdrawn   |
| 1644568 | F | Addis Ababa Lower Than           | 0 | 60  | Y | Fail        |
| 1678800 | M | Afar Region A Level or Higher    | 2 | 90  | N | Pass        |
| 1679727 | M | Afar Region A Level or Higher    | 0 | 60  | N | Pass        |
| 1679862 | M | Afar Region A Level or Higher    | 0 | 135 | Y | Fail        |
| 1684787 | M | South West HE Qualification      | 0 | 90  | N | Withdrawn   |
| 1687996 | M | Amhara Region Lower Than         | 0 | 60  | N | Withdrawn   |
| 1689069 | F | North Region A Level or Higher   | 0 | 60  | N | Pass        |
| 1713615 | F | South West HE Qualification      | 0 | 130 | N | Distinction |
| 1716492 | M | Addis Ababa Lower Than           | 0 | 60  | Y | Fail        |
| 1721891 | M | South Region Lower Than          | 0 | 60  | N | Fail        |
| 1723019 | F | South Region HE Qualification    | 0 | 120 | N | Fail        |
| 1753235 | M | Sidamo Region HE Qualification   | 0 | 60  | N | Withdrawn   |
| 1756165 | F | North Region HE Qualification    | 0 | 60  | N | Pass        |
| 1766513 | M | Oromia Region Lower Than         | 1 | 60  | N | Pass        |
| 1777511 | M | South West A Level or Higher     | 0 | 60  | N | Pass        |
| 1782581 | F | Addis Ababa Lower Than           | 0 | 60  | N | Withdrawn   |
| 1796059 | M | South Region Lower Than          | 0 | 60  | N | Withdrawn   |
| 1818677 | M | Addis Ababa A Level or Higher    | 0 | 90  | N | Withdrawn   |
| 1819994 | M | South Region HE Qualification    | 1 | 120 | N | Distinction |
| 1830562 | M | Afar Region HE Qualification     | 0 | 60  | N | Fail        |
| 1833308 | F | Sidamo Region Lower Than         | 0 | 60  | N | Withdrawn   |
| 1835411 | M | Afar Region HE Qualification     | 0 | 60  | N | Distinction |
| 1840610 | M | South Region HE Qualification    | 1 | 60  | N | Withdrawn   |
| 1847481 | F | Addis Ababa HE Qualification     | 0 | 60  | N | Pass        |
| 1868389 | M | Amhara Region A Level or Higher  | 0 | 60  | Y | Fail        |
| 1874363 | M | Somalia Region HE Qualification  | 0 | 60  | N | Pass        |
| 1877732 | M | South Region HE Qualification    | 0 | 90  | N | Withdrawn   |
| 1887928 | M | Amhara Region HE Qualification   | 0 | 90  | N | Pass        |
| 1894634 | M | Sidamo Region HE Qualification   | 1 | 180 | Y | Pass        |
| 1901764 | F | Sidamo Region HE Qualification   | 0 | 180 | N | Withdrawn   |
| 1903131 | M | Addis Ababa Lower Than           | 0 | 120 | N | Withdrawn   |
| 1903477 | M | Tigray Region HE Qualification   | 0 | 90  | N | Pass        |
| 1913872 | F | South Region A Level or Higher   | 1 | 60  | N | Fail        |
| 1935774 | M | South West A Level or Higher     | 2 | 60  | N | Withdrawn   |
| 1957728 | M | Somalia Region Lower Than        | 0 | 60  | N | Fail        |
| 1963677 | M | Amhara Region Lower Than         | 0 | 60  | Y | Pass        |
| 1982833 | M | Tigray Region HE Qualification   | 0 | 60  | N | Fail        |
| 2014252 | M | South Region HE Qualification    | 0 | 60  | N | Withdrawn   |
| 2032057 | M | South Region A Level or Higher   | 0 | 60  | N | Pass        |
| 2032882 | F | Somalia Region A Level or Higher | 0 | 60  | Y | Withdrawn   |
| 2034802 | M | Afar Region HE Qualification     | 0 | 130 | N | Distinction |
| 2039190 | F | North Region Lower Than          | 0 | 60  | N | Distinction |
| 2039810 | M | Afar Region HE Qualification     | 0 | 60  | N | Withdrawn   |
| 2043916 | M | Oromia Region Lower Than         | 0 | 120 | N | Withdrawn   |



|         |   |                            |   |     |   |             |
|---------|---|----------------------------|---|-----|---|-------------|
| 2045139 | M | Afar Region Lower Than     | 0 | 70  | N | Withdrawn   |
| 2046628 | M | South West HE Qualific     | 1 | 120 | Y | Withdrawn   |
| 2068627 | F | Afar Region Post Gradu     | 0 | 130 | N | Withdrawn   |
| 2082180 | M | Sidamo Region A Level or   | 2 | 60  | N | Withdrawn   |
| 2089582 | F | Oromia Region HE Qualific  | 0 | 60  | N | Pass        |
| 2094546 | M | Addis Ababa A Level or     | 1 | 60  | N | Withdrawn   |
| 2098405 | M | South Region HE Qualific   | 0 | 60  | N | Pass        |
| 2112088 | F | South West A Level or      | 1 | 70  | N | Pass        |
| 2134578 | F | Addis Ababa A Level or     | 0 | 60  | N | Withdrawn   |
| 2149701 | F | Tigray Region Lower Than   | 0 | 240 | N | Withdrawn   |
| 2157412 | M | South West HE Qualific     | 0 | 60  | N | Pass        |
| 2175266 | M | Tigray Region HE Qualific  | 0 | 60  | N | Withdrawn   |
| 2194777 | M | Addis Ababa Lower Than     | 0 | 120 | N | Withdrawn   |
| 2195479 | F | South Region Lower Than    | 0 | 90  | N | Withdrawn   |
| 2198952 | M | South West A Level or      | 0 | 60  | N | Pass        |
| 2198970 | M | Amhara Region HE Qualific  | 0 | 60  | N | Withdrawn   |
| 2202076 | M | South West Lower Than      | 0 | 90  | N | Pass        |
| 2204293 | F | Afar Region Lower Than     | 0 | 120 | N | Pass        |
| 2215898 | F | Afar Region HE Qualific    | 2 | 60  | Y | Pass        |
| 2221869 | F | Tigray Region HE Qualific  | 2 | 150 | N | Withdrawn   |
| 2232218 | M | South Region A Level or    | 1 | 120 | N | Pass        |
| 2239650 | F | Addis Ababa HE Qualific    | 0 | 140 | N | Distinction |
| 2252750 | F | Addis Ababa A Level or     | 0 | 220 | N | Pass        |
| 2253576 | M | Sidamo Region Lower Than   | 0 | 60  | N | Fail        |
| 2256318 | M | Sidamo Region A Level or   | 1 | 120 | Y | Withdrawn   |
| 2281870 | M | Addis Ababa Lower Than     | 0 | 60  | N | Withdrawn   |
| 2282040 | F | Sidamo Region A Level or   | 0 | 60  | N | Pass        |
| 2284294 | F | Somalia Region HE Qualific | 0 | 60  | N | Distinction |
| 2288599 | M | North Region Lower Than    | 0 | 60  | N | Withdrawn   |
| 2289847 | M | South West Lower Than      | 0 | 60  | N | Pass        |
| 2292724 | M | Addis Ababa Lower Than     | 1 | 60  | N | Pass        |
| 2296163 | F | Tigray Region A Level or   | 0 | 120 | N | Pass        |
| 2305957 | F | Amhara Region HE Qualific  | 0 | 150 | N | Withdrawn   |
| 2314761 | M | Somalia Region A Level or  | 0 | 60  | N | Withdrawn   |
| 2321492 | F | Somalia Region Lower Than  | 0 | 150 | Y | Withdrawn   |
| 2325606 | F | North Region Lower Than    | 1 | 70  | N | Withdrawn   |
| 2327045 | M | Sidamo Region A Level or   | 0 | 60  | N | Pass        |
| 2327472 | M | South West HE Qualific     | 0 | 60  | N | Pass        |
| 2336922 | F | Oromia Region A Level or   | 0 | 180 | N | Withdrawn   |
| 2337441 | F | Afar Region Lower Than     | 0 | 60  | N | Fail        |
| 2339150 | F | South Region A Level or    | 4 | 60  | N | Fail        |
| 2340230 | F | Afar Region HE Qualific    | 0 | 120 | N | Pass        |
| 2340786 | M | Sidamo Region A Level or   | 0 | 60  | N | Distinction |
| 2342399 | M | South West Lower Than      | 1 | 60  | N | Pass        |
| 2352039 | F | Amhara Region Lower Than   | 0 | 180 | N | Withdrawn   |
| 2355555 | M | South West Lower Than      | 0 | 60  | Y | Fail        |
| 2356801 | M | Addis Ababa HE Qualific    | 0 | 60  | N | Pass        |

|         |   |                           |   |     |   |             |
|---------|---|---------------------------|---|-----|---|-------------|
| 2358707 | F | South Wes A Level or l    | 0 | 120 | N | Pass        |
| 2359191 | M | Sidamo Re Lower Tha       | 0 | 60  | N | Pass        |
| 2365438 | M | Sidamo Re HE Qualific     | 0 | 60  | N | Fail        |
| 2366024 | M | Amhara Re A Level or l    | 0 | 90  | N | Fail        |
| 2366701 | F | South Wes HE Qualific     | 1 | 190 | Y | Withdrawn   |
| 2367887 | F | Afar Regio A Level or l   | 1 | 330 | N | Withdrawn   |
| 2375123 | M | Amhara Re HE Qualific     | 1 | 60  | N | Pass        |
| 2375627 | M | Tigrai Regio A Level or l | 1 | 60  | Y | Pass        |
| 2377769 | F | Amhara Re A Level or l    | 0 | 60  | N | Pass        |
| 2382048 | F | Somalia Re HE Qualific    | 0 | 90  | N | Distinction |
| 2383036 | F | Sidamo Re A Level or l    | 0 | 120 | N | Pass        |
| 2388030 | M | Afar Regio A Level or l   | 3 | 60  | N | Fail        |
| 2404530 | M | Afar Regio A Level or l   | 0 | 70  | N | Fail        |
| 2409396 | F | South Regi A Level or l   | 0 | 90  | Y | Withdrawn   |
| 2410364 | F | Somalia Re A Level or l   | 0 | 60  | N | Withdrawn   |
| 2411981 | M | Tigrai Regio A Level or l | 0 | 270 | N | Withdrawn   |
| 2416024 | M | Addis Abat Lower Tha      | 0 | 60  | N | Fail        |
| 2421961 | M | Sidamo Re A Level or l    | 0 | 90  | N | Fail        |
| 2430070 | M | Sidamo Re A Level or l    | 0 | 60  | N | Pass        |
| 2430405 | F | Somalia Re Lower Tha      | 0 | 60  | Y | Pass        |
| 2434369 | F | Afar Regio HE Qualific    | 0 | 240 | Y | Distinction |
| 2437065 | M | Afar Regio A Level or l   | 1 | 60  | Y | Distinction |
| 2445016 | F | South Wes A Level or l    | 1 | 150 | N | Withdrawn   |
| 2446109 | M | Addis Abat Lower Tha      | 0 | 90  | N | Pass        |
| 2452902 | F | South Regi Lower Tha      | 0 | 120 | Y | Withdrawn   |
| 2457907 | M | Amhara Re A Level or l    | 0 | 90  | N | Pass        |
| 2461936 | M | Somalia Re A Level or l   | 0 | 60  | N | Pass        |
| 2462628 | M | Oromia Re HE Qualific     | 0 | 60  | N | Pass        |
| 2472145 | M | Addis Abat HE Qualific    | 1 | 160 | N | Pass        |
| 2473456 | F | Sidamo Re Lower Tha       | 0 | 60  | N | Pass        |
| 2474436 | F | Amhara Re A Level or l    | 0 | 120 | N | Fail        |
| 2477052 | M | South Regi Lower Tha      | 0 | 70  | N | Pass        |
| 2477792 | M | Oromia Re HE Qualific     | 0 | 60  | N | Withdrawn   |
| 2479086 | F | Afar Regio Lower Tha      | 1 | 60  | N | Fail        |
| 2485582 | M | South Wes Lower Tha       | 0 | 60  | N | Distinction |
| 2485856 | F | Afar Regio Lower Tha      | 1 | 120 | N | Withdrawn   |
| 2486769 | M | Sidamo Re HE Qualific     | 0 | 90  | N | Fail        |
| 2494999 | F | North Regi Lower Tha      | 0 | 60  | N | Fail        |
| 2495352 | M | South Wes Lower Tha       | 0 | 60  | N | Fail        |
| 2501578 | F | Tigrai Regio A Level or l | 0 | 60  | N | Withdrawn   |
| 2505389 | M | South Regi A Level or l   | 0 | 60  | N | Withdrawn   |
| 2505413 | F | South Regi Lower Tha      | 0 | 120 | Y | Withdrawn   |
| 2505859 | M | North Regi HE Qualific    | 0 | 60  | N | Pass        |
| 2520868 | F | Sidamo Re Lower Tha       | 0 | 120 | N | Pass        |
| 2522932 | F | Afar Regio HE Qualific    | 0 | 90  | N | Fail        |
| 2539092 | M | Afar Regio Lower Tha      | 1 | 60  | N | Fail        |
| 2540195 | M | South Regi HE Qualific    | 1 | 90  | N | Fail        |

|         |   |             |              |   |     |   |             |
|---------|---|-------------|--------------|---|-----|---|-------------|
| 2542803 | M | Tigrai Regi | A Level or I | 0 | 60  | N | Withdrawn   |
| 2546792 | M | Amhara Re   | Lower Thar   | 1 | 90  | N | Withdrawn   |
| 2546976 | M | Tigrai Regi | HE Qualific  | 0 | 60  | N | Withdrawn   |
| 2547032 | F | Amhara Re   | A Level or I | 1 | 60  | N | Withdrawn   |
| 2550054 | F | Amhara Re   | HE Qualific  | 0 | 60  | N | Fail        |
| 2552672 | F | Afar Regioi | HE Qualific  | 1 | 60  | Y | Pass        |
| 2554973 | M | South Regi  | Lower Thar   | 1 | 60  | N | Fail        |
| 2555596 | M | South Regi  | A Level or I | 0 | 90  | N | Pass        |
| 2556345 | F | Amhara Re   | Lower Thar   | 1 | 60  | N | Fail        |
| 2560868 | M | Sidamo Re,  | A Level or I | 0 | 60  | N | Pass        |
| 2561282 | F | South Regi  | Lower Thar   | 0 | 60  | Y | Fail        |
| 2561811 | M | Oromia Re   | Lower Thar   | 0 | 60  | N | Withdrawn   |
| 2569051 | F | South Regi  | HE Qualific  | 0 | 60  | N | Fail        |
| 2569416 | M | South Regi  | A Level or I | 1 | 90  | N | Distinction |
| 2569653 | M | Amhara Re   | HE Qualific  | 0 | 90  | N | Fail        |
| 2570253 | M | Oromia Re   | Lower Thar   | 0 | 120 | N | Pass        |
| 2574281 | F | Amhara Re   | Lower Thar   | 0 | 60  | N | Fail        |
| 2576298 | M | South Wes   | A Level or I | 0 | 90  | N | Fail        |
| 2577480 | M | Amhara Re   | Lower Thar   | 0 | 120 | N | Withdrawn   |
| 2579683 | M | South Regi  | A Level or I | 0 | 60  | Y | Withdrawn   |
| 2581779 | M | Sidamo Re,  | A Level or I | 0 | 60  | N | Pass        |
| 2581822 | M | South Regi  | HE Qualific  | 1 | 150 | N | Pass        |
| 2585270 | M | Amhara Re   | A Level or I | 2 | 60  | N | Pass        |
| 2585395 | M | Oromia Re   | Lower Thar   | 0 | 60  | N | Withdrawn   |
| 2588379 | M | Addis Abat  | Lower Thar   | 0 | 60  | Y | Fail        |
| 2588655 | M | Afar Regioi | Lower Thar   | 1 | 60  | N | Withdrawn   |
| 2589096 | M | South Regi  | Lower Thar   | 0 | 60  | N | Withdrawn   |
| 2595968 | M | South Regi  | A Level or I | 0 | 60  | N | Withdrawn   |
| 2597673 | F | Afar Regioi | HE Qualific  | 0 | 60  | N | Withdrawn   |
| 2598861 | M | South Wes   | Lower Thar   | 1 | 60  | N | Withdrawn   |
| 2602235 | M | Somalia Re  | Lower Thar   | 0 | 90  | N | Fail        |
| 2606871 | M | Afar Regioi | HE Qualific  | 0 | 60  | N | Withdrawn   |
| 2608420 | F | Somalia Re  | Lower Thar   | 0 | 120 | N | Withdrawn   |
| 2612561 | M | North Regi  | A Level or I | 0 | 60  | N | Pass        |
| 2613296 | M | Afar Regioi | Lower Thar   | 1 | 120 | N | Pass        |
| 2615169 | M | Tigrai Regi | A Level or I | 0 | 60  | N | Withdrawn   |
| 2615761 | F | Sidamo Re,  | A Level or I | 1 | 60  | N | Fail        |
| 2618352 | F | Sidamo Re,  | Lower Thar   | 0 | 60  | N | Withdrawn   |
| 2624040 | F | South Wes   | Lower Thar   | 1 | 210 | N | Pass        |
| 2627449 | M | Somalia Re  | Lower Thar   | 0 | 120 | N | Pass        |
| 2630796 | F | Sidamo Re,  | A Level or I | 0 | 120 | N | Withdrawn   |
| 2631225 | F | Afar Regioi | HE Qualific  | 0 | 60  | N | Withdrawn   |
| 2635163 | M | Afar Regioi | Lower Thar   | 0 | 70  | N | Pass        |
| 2636885 | F | Sidamo Re,  | A Level or I | 2 | 120 | N | Fail        |
| 2639310 | M | Addis Abat  | A Level or I | 0 | 90  | N | Pass        |
| 2642498 | F | Afar Regioi | Lower Thar   | 2 | 120 | Y | Withdrawn   |
| 2643555 | M | Afar Regioi | A Level or I | 0 | 60  | N | Pass        |

|         |   |                          |   |     |   |             |
|---------|---|--------------------------|---|-----|---|-------------|
| 2646291 | F | South Wes A Level or I   | 1 | 60  | N | Pass        |
| 2648271 | M | Afar Region A Level or I | 1 | 60  | N | Withdrawn   |
| 2648317 | M | Somalia Re Lower Than    | 0 | 60  | Y | Withdrawn   |
| 2649310 | F | Sidamo Re Lower Than     | 0 | 60  | N | Withdrawn   |
| 2650741 | M | South Regi Lower Than    | 0 | 60  | N | Pass        |
| 2654602 | M | South Regi HE Qualific   | 0 | 90  | N | Withdrawn   |
| 2658898 | F | South Wes Lower Than     | 0 | 120 | N | Pass        |
| 2662178 | F | South Regi A Level or I  | 2 | 60  | N | Pass        |
| 2662451 | M | Afar Region A Level or I | 2 | 60  | N | Withdrawn   |
| 2663010 | M | Addis Abak Lower Than    | 2 | 60  | N | Pass        |
| 2668945 | M | Afar Region A Level or I | 1 | 60  | N | Withdrawn   |
| 2671469 | F | Oromia Re Lower Than     | 0 | 60  | N | Pass        |
| 2677097 | F | Afar Region A Level or I | 0 | 120 | N | Pass        |
| 2678587 | M | Somalia Re Lower Than    | 0 | 60  | N | Withdrawn   |
| 2681198 | M | Addis Abak Lower Than    | 2 | 100 | N | Withdrawn   |
| 2681471 | M | South Regi A Level or I  | 0 | 60  | N | Withdrawn   |
| 2683696 | M | South Regi A Level or I  | 0 | 330 | N | Withdrawn   |
| 2685827 | F | Somalia Re Lower Than    | 1 | 120 | N | Withdrawn   |
| 2686578 | M | Afar Region A Level or I | 0 | 90  | N | Distinction |
| 2688422 | F | South Regi A Level or I  | 0 | 120 | Y | Withdrawn   |
| 2691780 | F | Addis Abak A Level or I  | 1 | 120 | N | Withdrawn   |
| 2692186 | F | Amhara Re Lower Than     | 1 | 60  | Y | Pass        |
| 2695608 | F | South Regi A Level or I  | 0 | 60  | N | Pass        |
| 2697921 | M | Addis Abak Lower Than    | 0 | 120 | N | Withdrawn   |
| 24213   | F | Addis Abak A Level or I  | 1 | 60  | N | Pass        |
| 28149   | M | Addis Abak A Level or I  | 0 | 60  | N | Withdrawn   |
| 31269   | F | Somalia Re A Level or I  | 1 | 120 | N | Withdrawn   |
| 35502   | M | South Regi HE Qualific   | 0 | 60  | N | Withdrawn   |
| 39660   | F | Amhara Re Lower Than     | 0 | 120 | N | Fail        |
| 46753   | F | Addis Abak A Level or I  | 0 | 60  | N | Pass        |
| 49119   | M | South Wes HE Qualific    | 0 | 90  | N | Withdrawn   |
| 50309   | M | Somalia Re Lower Than    | 1 | 60  | N | Withdrawn   |
| 50476   | F | South Wes HE Qualific    | 0 | 60  | N | Distinction |
| 50619   | M | Amhara Re A Level or I   | 0 | 60  | N | Withdrawn   |
| 51030   | M | South Regi A Level or I  | 0 | 60  | N | Pass        |
| 53632   | M | Tigrai Regi Lower Than   | 1 | 60  | N | Withdrawn   |
| 54810   | M | South Regi HE Qualific   | 0 | 60  | N | Withdrawn   |
| 58617   | M | Somalia Re A Level or I  | 0 | 60  | N | Fail        |
| 61911   | M | Tigrai Regi Lower Than   | 0 | 180 | N | Fail        |
| 64450   | M | South Regi Lower Than    | 1 | 120 | N | Pass        |
| 64767   | M | Addis Abak A Level or I  | 0 | 60  | N | Withdrawn   |
| 67781   | F | South Regi A Level or I  | 0 | 60  | N | Distinction |
| 69489   | M | South Wes Lower Than     | 2 | 150 | N | Fail        |
| 71723   | M | Amhara Re A Level or I   | 0 | 60  | N | Fail        |
| 75309   | F | Somalia Re A Level or I  | 0 | 120 | N | Withdrawn   |
| 75469   | M | Somalia Re A Level or I  | 4 | 210 | N | Withdrawn   |
| 76081   | F | Somalia Re Lower Than    | 0 | 150 | Y | Withdrawn   |

|        |   |             |              |   |     |   |             |
|--------|---|-------------|--------------|---|-----|---|-------------|
| 84576  | M | Tigrai Regi | HE Qualific  | 0 | 150 | N | Distinction |
| 84605  | M | North Regi  | A Level or l | 1 | 120 | N | Pass        |
| 85216  | F | Afar Regio  | HE Qualific  | 1 | 195 | N | Fail        |
| 85304  | F | Sidamo Re   | HE Qualific  | 0 | 60  | N | Withdrawn   |
| 88490  | M | Afar Regio  | Post Gradu   | 0 | 60  | N | Distinction |
| 88910  | F | Amhara Re   | Lower Thar   | 1 | 180 | N | Pass        |
| 89904  | M | Tigrai Regi | Lower Thar   | 0 | 60  | N | Pass        |
| 90537  | F | Afar Regio  | A Level or l | 0 | 60  | Y | Pass        |
| 95356  | F | Afar Regio  | HE Qualific  | 1 | 240 | N | Withdrawn   |
| 97939  | M | Afar Regio  | A Level or l | 0 | 60  | Y | Fail        |
| 99151  | M | Sidamo Re   | Lower Thar   | 0 | 120 | N | Fail        |
| 103891 | M | South Regi  | HE Qualific  | 0 | 60  | N | Withdrawn   |
| 111959 | M | South Regi  | Lower Thar   | 0 | 60  | N | Withdrawn   |
| 116763 | F | Sidamo Re   | Lower Thar   | 1 | 120 | N | Withdrawn   |
| 117281 | M | South Regi  | A Level or l | 0 | 60  | N | Pass        |
| 117435 | M | South Wes   | Lower Thar   | 1 | 60  | Y | Fail        |
| 118479 | M | South Wes   | A Level or l | 0 | 60  | N | Pass        |
| 118578 | F | Afar Regio  | A Level or l | 1 | 100 | Y | Withdrawn   |
| 124134 | F | Sidamo Re   | HE Qualific  | 1 | 60  | Y | Fail        |
| 124847 | F | Amhara Re   | Lower Thar   | 0 | 210 | Y | Withdrawn   |
| 127580 | F | South Regi  | Lower Thar   | 0 | 60  | N | Pass        |
| 128348 | M | South Regi  | A Level or l | 0 | 60  | N | Withdrawn   |
| 131695 | F | Somalia Re  | Lower Thar   | 1 | 120 | N | Withdrawn   |
| 134721 | F | South Regi  | Lower Thar   | 2 | 60  | N | Withdrawn   |
| 137150 | M | Oromia Re   | Lower Thar   | 0 | 60  | Y | Withdrawn   |
| 138204 | M | Addis Abak  | A Level or l | 0 | 60  | N | Fail        |
| 138416 | M | North Regi  | Lower Thar   | 0 | 60  | N | Pass        |
| 138704 | M | South Wes   | A Level or l | 0 | 60  | N | Pass        |
| 139455 | F | South Regi  | Lower Thar   | 2 | 60  | N | Fail        |
| 141182 | M | Sidamo Re   | A Level or l | 1 | 120 | N | Withdrawn   |
| 141301 | M | South Regi  | Lower Thar   | 3 | 150 | N | Withdrawn   |
| 141497 | M | Amhara Re   | A Level or l | 0 | 60  | N | Fail        |
| 144908 | M | Addis Abak  | Lower Thar   | 0 | 60  | N | Withdrawn   |
| 145114 | F | South Wes   | A Level or l | 0 | 60  | N | Pass        |
| 145640 | M | Addis Abak  | A Level or l | 0 | 60  | N | Distinction |
| 145770 | M | Sidamo Re   | Lower Thar   | 0 | 60  | N | Withdrawn   |
| 152320 | M | South Regi  | A Level or l | 0 | 60  | Y | Withdrawn   |
| 154697 | F | South Wes   | A Level or l | 4 | 80  | Y | Withdrawn   |
| 157310 | F | Sidamo Re   | Lower Thar   | 1 | 210 | N | Withdrawn   |
| 161286 | M | South Regi  | HE Qualific  | 0 | 60  | N | Withdrawn   |
| 161878 | F | North Regi  | HE Qualific  | 0 | 60  | N | Withdrawn   |
| 162901 | F | Afar Regio  | HE Qualific  | 0 | 60  | N | Withdrawn   |
| 165178 | F | South Regi  | A Level or l | 1 | 120 | N | Fail        |
| 172965 | M | Afar Regio  | Post Gradu   | 1 | 150 | N | Withdrawn   |
| 178258 | F | South Regi  | HE Qualific  | 0 | 270 | N | Withdrawn   |
| 183331 | M | South Wes   | Lower Thar   | 0 | 90  | N | Fail        |
| 187663 | M | North Regi  | HE Qualific  | 0 | 60  | N | Pass        |

|        |   |                         |   |     |   |             |
|--------|---|-------------------------|---|-----|---|-------------|
| 189178 | M | Oromia Re A Level or I  | 0 | 60  | N | Fail        |
| 189442 | F | Somalia Re Lower Than   | 0 | 135 | N | Withdrawn   |
| 192186 | M | South Regi A Level or I | 0 | 120 | N | Pass        |
| 196264 | M | South Regi Lower Than   | 0 | 60  | N | Withdrawn   |
| 201151 | F | South Wes A Level or I  | 0 | 60  | Y | Distinction |
| 226895 | M | South Regi HE Qualific  | 0 | 90  | N | Withdrawn   |
| 227826 | M | Somalia Re A Level or I | 1 | 60  | N | Withdrawn   |
| 228272 | F | South Regi A Level or I | 0 | 60  | N | Pass        |
| 228373 | F | South Wes A Level or I  | 1 | 60  | N | Fail        |
| 228775 | M | North Regi Lower Than   | 0 | 60  | N | Fail        |
| 229499 | M | Somalia Re A Level or I | 1 | 90  | N | Fail        |
| 231973 | F | Oromia Re Lower Than    | 0 | 60  | Y | Withdrawn   |
| 232827 | M | South Regi HE Qualific  | 0 | 60  | N | Distinction |
| 233868 | M | South Regi HE Qualific  | 0 | 60  | N | Withdrawn   |
| 236015 | M | South Regi HE Qualific  | 0 | 60  | N | Withdrawn   |
| 237925 | F | Somalia Re Lower Than   | 1 | 60  | N | Withdrawn   |
| 237969 | F | Sidamo Re HE Qualific   | 0 | 60  | N | Withdrawn   |
| 239459 | F | Somalia Re A Level or I | 0 | 60  | N | Pass        |
| 240389 | F | South Regi HE Qualific  | 1 | 150 | N | Withdrawn   |
| 240486 | M | South Regi A Level or I | 0 | 60  | N | Pass        |
| 240755 | M | Sidamo Re A Level or I  | 1 | 120 | N | Distinction |
| 242633 | F | Sidamo Re Lower Than    | 0 | 60  | N | Pass        |
| 244438 | M | Amhara Re A Level or I  | 1 | 540 | N | Withdrawn   |
| 247342 | F | Sidamo Re A Level or I  | 0 | 135 | N | Withdrawn   |
| 250058 | F | Amhara Re Lower Than    | 0 | 60  | N | Withdrawn   |
| 255622 | F | South Regi HE Qualific  | 1 | 180 | N | Withdrawn   |
| 260367 | M | South Wes Lower Than    | 0 | 120 | N | Withdrawn   |
| 260565 | M | South Regi A Level or I | 1 | 60  | Y | Pass        |
| 263022 | F | South Wes HE Qualific   | 0 | 60  | N | Withdrawn   |
| 264723 | M | Somalia Re Lower Than   | 0 | 60  | N | Pass        |
| 266922 | M | North Regi Lower Than   | 2 | 120 | N | Pass        |
| 267118 | F | South Wes Lower Than    | 0 | 90  | Y | Withdrawn   |
| 268883 | M | Afar Region Post Gradu  | 1 | 150 | N | Withdrawn   |
| 268915 | F | Addis Abak Lower Than   | 0 | 60  | N | Withdrawn   |
| 271974 | F | South Regi A Level or I | 0 | 120 | N | Pass        |
| 277166 | F | Somalia Re A Level or I | 1 | 90  | Y | Pass        |
| 284540 | F | Oromia Re Lower Than    | 1 | 120 | N | Fail        |
| 285412 | M | North Regi Lower Than   | 0 | 60  | N | Pass        |
| 286449 | F | Somalia Re Lower Than   | 6 | 120 | N | Fail        |
| 287499 | M | Sidamo Re Lower Than    | 0 | 60  | Y | Withdrawn   |
| 288407 | M | Sidamo Re A Level or I  | 0 | 60  | N | Withdrawn   |
| 291005 | F | Addis Abak Lower Than   | 1 | 60  | N | Fail        |
| 299949 | M | Oromia Re A Level or I  | 1 | 60  | N | Withdrawn   |
| 300592 | M | South Regi A Level or I | 0 | 90  | N | Pass        |
| 306944 | F | Oromia Re A Level or I  | 2 | 120 | N | Fail        |
| 309258 | M | South Wes HE Qualific   | 2 | 120 | N | Withdrawn   |
| 309756 | M | Sidamo Re No Formal     | 2 | 150 | N | Fail        |

|        |   |                         |   |     |   |             |
|--------|---|-------------------------|---|-----|---|-------------|
| 312761 | M | Somalia Re A Level or I | 0 | 60  | N | Pass        |
| 315517 | F | Sidamo Re Lower Tha     | 1 | 180 | Y | Withdrawn   |
| 315633 | M | Sidamo Re Lower Tha     | 0 | 180 | N | Withdrawn   |
| 315723 | M | Addis Abak A Level or I | 1 | 60  | N | Withdrawn   |
| 317801 | M | Addis Abak A Level or I | 3 | 90  | N | Pass        |
| 320593 | M | Amhara Re Lower Tha     | 0 | 60  | N | Fail        |
| 321810 | M | Somalia Re Lower Tha    | 0 | 60  | N | Pass        |
| 323659 | F | South Regi Lower Tha    | 0 | 60  | N | Withdrawn   |
| 325044 | F | Afar Regio HE Qualific  | 0 | 60  | N | Distinction |
| 325566 | M | South Wes A Level or I  | 0 | 60  | N | Fail        |
| 327449 | M | Tigrai Regi Lower Tha   | 0 | 90  | N | Fail        |
| 328123 | M | South Regi Lower Tha    | 1 | 60  | Y | Fail        |
| 333308 | F | Oromia Re A Level or I  | 0 | 70  | N | Pass        |
| 334504 | F | South Regi Lower Tha    | 2 | 60  | N | Withdrawn   |
| 335471 | F | Oromia Re HE Qualific   | 0 | 60  | N | Withdrawn   |
| 336936 | M | Somalia Re Lower Tha    | 0 | 60  | N | Withdrawn   |
| 339513 | F | Oromia Re A Level or I  | 0 | 60  | N | Pass        |
| 347365 | M | South Regi A Level or I | 0 | 60  | N | Fail        |
| 348439 | F | Addis Abak A Level or I | 0 | 60  | Y | Withdrawn   |
| 352308 | M | South Wes A Level or I  | 0 | 60  | N | Withdrawn   |
| 352600 | F | Afar Regio HE Qualific  | 0 | 135 | N | Withdrawn   |
| 352679 | F | South Regi Lower Tha    | 1 | 120 | N | Withdrawn   |
| 354050 | M | South Wes A Level or I  | 2 | 90  | N | Fail        |
| 354953 | M | Addis Abak A Level or I | 2 | 60  | N | Withdrawn   |
| 355309 | M | North Regi Lower Tha    | 0 | 120 | N | Distinction |
| 355780 | M | North Regi HE Qualific  | 0 | 60  | N | Withdrawn   |
| 355935 | F | Sidamo Re A Level or I  | 1 | 60  | N | Pass        |
| 356166 | M | South Regi Post Gradu   | 0 | 60  | N | Pass        |
| 356297 | M | Tigrai Regi Lower Tha   | 0 | 60  | N | Pass        |
| 356705 | F | Oromia Re HE Qualific   | 0 | 150 | N | Withdrawn   |
| 360759 | M | South Regi HE Qualific  | 0 | 60  | N | Withdrawn   |
| 361842 | M | South Regi Lower Tha    | 0 | 120 | N | Withdrawn   |
| 362115 | M | South Regi A Level or I | 2 | 120 | N | Fail        |
| 363122 | M | Sidamo Re Lower Tha     | 0 | 60  | N | Pass        |
| 365397 | F | South Wes Lower Tha     | 0 | 60  | N | Fail        |
| 365764 | M | South Regi A Level or I | 0 | 60  | N | Fail        |
| 367045 | M | Afar Regio Lower Tha    | 1 | 180 | N | Withdrawn   |
| 367127 | F | Sidamo Re A Level or I  | 0 | 120 | N | Pass        |
| 367646 | F | Sidamo Re A Level or I  | 0 | 120 | N | Distinction |
| 370089 | M | Afar Regio HE Qualific  | 0 | 120 | N | Withdrawn   |
| 370865 | M | Addis Abak HE Qualific  | 0 | 60  | N | Pass        |
| 373790 | M | Addis Abak Lower Tha    | 0 | 120 | N | Withdrawn   |
| 373795 | F | Sidamo Re Lower Tha     | 0 | 60  | N | Withdrawn   |
| 374645 | F | South Wes A Level or I  | 0 | 160 | N | Pass        |
| 375856 | M | Addis Abak A Level or I | 0 | 150 | N | Pass        |
| 376280 | F | Sidamo Re A Level or I  | 1 | 60  | N | Fail        |
| 378728 | M | South Regi A Level or I | 0 | 60  | N | Pass        |

|        |   |                                 |   |     |   |             |
|--------|---|---------------------------------|---|-----|---|-------------|
| 379330 | F | Tigrai Region HE Qualification  | 1 | 60  | N | Withdrawn   |
| 380681 | M | Sidamo Region HE Qualification  | 0 | 60  | N | Withdrawn   |
| 382051 | F | South Region A Level or Higher  | 2 | 70  | N | Pass        |
| 384372 | F | South West Lower Than           | 2 | 60  | Y | Fail        |
| 385927 | M | Amhara Region A Level or Higher | 0 | 60  | N | Pass        |
| 385947 | M | South West A Level or Higher    | 0 | 60  | N | Withdrawn   |
| 386140 | F | Tigrai Region Lower Than        | 0 | 60  | N | Withdrawn   |
| 386671 | M | Amhara Region Lower Than        | 0 | 150 | N | Distinction |
| 386849 | F | Addis Ababa Lower Than          | 4 | 60  | N | Withdrawn   |
| 387289 | M | Addis Ababa Lower Than          | 2 | 120 | N | Fail        |
| 387656 | F | Amhara Region Lower Than        | 0 | 60  | Y | Withdrawn   |
| 387963 | M | Afar Region HE Qualification    | 0 | 60  | N | Distinction |
| 390026 | M | Sidamo Region Lower Than        | 0 | 120 | N | Pass        |
| 391611 | F | South West A Level or Higher    | 3 | 60  | N | Fail        |
| 391924 | F | North Region A Level or Higher  | 0 | 60  | N | Pass        |
| 392802 | F | Sidamo Region Lower Than        | 3 | 60  | N | Withdrawn   |
| 393094 | M | South Region Lower Than         | 1 | 150 | N | Withdrawn   |
| 394020 | M | North Region Lower Than         | 2 | 60  | N | Fail        |
| 395164 | M | Sidamo Region A Level or Higher | 2 | 150 | Y | Withdrawn   |
| 395288 | F | Addis Ababa Lower Than          | 1 | 90  | N | Fail        |
| 397429 | M | Sidamo Region A Level or Higher | 0 | 60  | N | Fail        |
| 398529 | M | Tigrai Region Lower Than        | 1 | 120 | N | Fail        |
| 399203 | F | Tigrai Region HE Qualification  | 2 | 120 | N | Withdrawn   |
| 400461 | F | Sidamo Region Lower Than        | 0 | 60  | N | Withdrawn   |
| 400599 | M | Tigrai Region HE Qualification  | 0 | 90  | N | Withdrawn   |
| 402314 | F | North Region HE Qualification   | 1 | 150 | N | Distinction |
| 402575 | F | Sidamo Region A Level or Higher | 0 | 60  | N | Withdrawn   |
| 406753 | F | Addis Ababa Lower Than          | 0 | 120 | N | Withdrawn   |
| 407115 | M | South Region A Level or Higher  | 3 | 120 | N | Fail        |
| 407303 | M | Afar Region A Level or Higher   | 0 | 120 | N | Pass        |
| 409284 | F | Tigrai Region No Formal         | 0 | 90  | N | Withdrawn   |
| 410816 | M | Addis Ababa A Level or Higher   | 0 | 330 | Y | Withdrawn   |
| 411060 | F | Somalia Region Lower Than       | 0 | 60  | N | Pass        |
| 412600 | M | Addis Ababa A Level or Higher   | 1 | 60  | N | Fail        |
| 412663 | M | Amhara Region A Level or Higher | 0 | 60  | N | Pass        |
| 413629 | M | Afar Region HE Qualification    | 0 | 60  | N | Withdrawn   |
| 415151 | M | Somalia Region Lower Than       | 2 | 120 | Y | Fail        |
| 415695 | F | South Region A Level or Higher  | 1 | 120 | N | Fail        |
| 416008 | M | Afar Region Lower Than          | 1 | 60  | N | Pass        |
| 418453 | F | North Region A Level or Higher  | 1 | 60  | N | Pass        |
| 418781 | M | South Region Lower Than         | 2 | 120 | N | Pass        |
| 421242 | M | South West A Level or Higher    | 0 | 60  | N | Withdrawn   |
| 421754 | F | Oromia Region A Level or Higher | 0 | 60  | N | Withdrawn   |
| 421877 | F | Amhara Region A Level or Higher | 1 | 120 | Y | Withdrawn   |
| 424880 | F | Addis Ababa A Level or Higher   | 1 | 150 | N | Pass        |
| 426137 | M | South West A Level or Higher    | 2 | 120 | N | Withdrawn   |
| 426297 | F | Addis Ababa Lower Than          | 0 | 60  | N | Distinction |



|        |   |                          |   |     |   |             |
|--------|---|--------------------------|---|-----|---|-------------|
| 428769 | M | North Regi A Level or I  | 1 | 120 | N | Fail        |
| 430282 | M | South Wes Lower Thar     | 1 | 60  | Y | Withdrawn   |
| 430678 | M | Sidamo Re A Level or I   | 1 | 60  | N | Pass        |
| 431136 | M | Tigrai Regi A Level or I | 1 | 60  | N | Withdrawn   |
| 431406 | F | South Wes A Level or I   | 0 | 60  | N | Distinction |
| 434002 | F | Sidamo Re A Level or I   | 0 | 120 | N | Withdrawn   |
| 434841 | M | Afar Regi A Level or I   | 0 | 60  | N | Fail        |
| 440103 | M | Addis Abak Lower Thar    | 0 | 60  | N | Pass        |
| 440331 | F | South Regi A Level or I  | 1 | 60  | N | Pass        |
| 440798 | M | Tigrai Regi Lower Thar   | 1 | 150 | N | Fail        |
| 441213 | M | Amhara Re A Level or I   | 1 | 60  | N | Pass        |
| 441393 | F | North Regi A Level or I  | 0 | 60  | N | Withdrawn   |
| 442393 | F | South Regi A Level or I  | 0 | 60  | Y | Fail        |
| 442873 | F | Somalia Re Lower Thar    | 0 | 120 | N | Pass        |
| 443861 | M | South Regi Lower Thar    | 0 | 60  | N | Pass        |
| 444474 | M | South Wes A Level or I   | 1 | 60  | N | Withdrawn   |
| 445145 | M | South Regi A Level or I  | 0 | 60  | N | Fail        |
| 445857 | F | Oromia Re A Level or I   | 0 | 60  | N | Pass        |
| 447162 | M | South Regi A Level or I  | 0 | 60  | N | Pass        |
| 464592 | M | Tigrai Regi Lower Thar   | 1 | 60  | N | Fail        |
| 464685 | F | Addis Abak A Level or I  | 1 | 70  | N | Pass        |
| 464748 | F | North Regi HE Qualific   | 0 | 120 | N | Withdrawn   |
| 464887 | M | South Regi Lower Thar    | 0 | 120 | N | Withdrawn   |
| 465413 | F | Oromia Re Lower Thar     | 0 | 150 | N | Pass        |
| 466158 | F | South Regi Lower Thar    | 2 | 180 | Y | Withdrawn   |
| 466714 | M | South Wes A Level or I   | 2 | 120 | Y | Withdrawn   |
| 467230 | M | Addis Abak A Level or I  | 1 | 90  | N | Distinction |
| 468386 | F | Afar Regi HE Qualific    | 2 | 310 | N | Withdrawn   |
| 469425 | M | Addis Abak HE Qualific   | 0 | 120 | N | Fail        |
| 469614 | M | Tigrai Regi Lower Thar   | 0 | 90  | N | Pass        |
| 470555 | M | South Wes Lower Thar     | 0 | 60  | Y | Withdrawn   |
| 470733 | M | Sidamo Re A Level or I   | 0 | 60  | N | Fail        |
| 471189 | M | Sidamo Re Lower Thar     | 1 | 120 | N | Withdrawn   |
| 471476 | F | Amhara Re A Level or I   | 1 | 120 | N | Fail        |
| 471669 | M | Sidamo Re Lower Thar     | 1 | 60  | N | Fail        |
| 472257 | M | South Regi A Level or I  | 1 | 150 | N | Pass        |
| 472284 | M | Sidamo Re Lower Thar     | 0 | 60  | N | Distinction |
| 472651 | M | South Wes HE Qualific    | 0 | 60  | N | Distinction |
| 473265 | F | Oromia Re Lower Thar     | 0 | 75  | N | Withdrawn   |
| 473406 | M | Afar Regi Lower Thar     | 1 | 120 | N | Withdrawn   |
| 474153 | M | Sidamo Re Lower Thar     | 3 | 150 | N | Fail        |
| 474451 | M | Amhara Re Lower Thar     | 1 | 60  | Y | Fail        |
| 477063 | M | Addis Abak Lower Thar    | 3 | 150 | N | Fail        |
| 477180 | F | Somalia Re Lower Thar    | 2 | 130 | N | Fail        |
| 479649 | M | South Regi A Level or I  | 0 | 60  | N | Pass        |
| 479921 | F | South Regi A Level or I  | 2 | 75  | N | Withdrawn   |
| 480956 | M | Afar Regi HE Qualific    | 0 | 60  | N | Pass        |

|        |   |                   |                     |   |     |   |             |
|--------|---|-------------------|---------------------|---|-----|---|-------------|
| 481863 | F | Afar Region       | A Level or Higher   | 1 | 120 | N | Pass        |
| 484130 | F | Sidamo Region     | A Level or Higher   | 0 | 70  | N | Withdrawn   |
| 484213 | F | Sidamo Region     | A Level or Higher   | 0 | 130 | N | Pass        |
| 484305 | M | Addis Ababa       | Lower Than A Level  | 2 | 150 | N | Withdrawn   |
| 484762 | F | Oromia Region     | A Level or Higher   | 2 | 120 | Y | Pass        |
| 485219 | M | Addis Ababa       | A Level or Higher   | 1 | 90  | N | Fail        |
| 485306 | F | South Region      | Lower Than A Level  | 0 | 60  | N | Withdrawn   |
| 486022 | M | Sidamo Region     | A Level or Higher   | 0 | 60  | N | Pass        |
| 488550 | F | Afar Region       | HE Qualification    | 1 | 120 | N | Withdrawn   |
| 489507 | F | North Region      | A Level or Higher   | 0 | 60  | N | Pass        |
| 490164 | F | Oromia Region     | Lower Than A Level  | 1 | 120 | Y | Fail        |
| 491036 | F | Oromia Region     | A Level or Higher   | 2 | 180 | N | Pass        |
| 491792 | M | South Region      | HE Qualification    | 0 | 120 | N | Withdrawn   |
| 491912 | M | Addis Ababa       | No Formal Education | 1 | 120 | N | Withdrawn   |
| 492095 | M | Amhara Region     | Lower Than A Level  | 0 | 60  | N | Pass        |
| 492537 | M | Sidamo Region     | Lower Than A Level  | 1 | 60  | Y | Pass        |
| 493055 | M | Sidamo Region     | HE Qualification    | 0 | 60  | N | Withdrawn   |
| 493296 | F | North Region      | Lower Than A Level  | 2 | 60  | N | Fail        |
| 493434 | M | South West Region | Lower Than A Level  | 0 | 120 | N | Withdrawn   |
| 493793 | M | South Region      | A Level or Higher   | 1 | 180 | Y | Withdrawn   |
| 493879 | M | Afar Region       | A Level or Higher   | 2 | 120 | Y | Withdrawn   |
| 493984 | F | Addis Ababa       | A Level or Higher   | 1 | 60  | N | Withdrawn   |
| 494329 | M | Amhara Region     | Lower Than A Level  | 0 | 60  | N | Withdrawn   |
| 496085 | F | South West Region | Lower Than A Level  | 0 | 150 | N | Fail        |
| 497206 | M | Sidamo Region     | A Level or Higher   | 1 | 60  | N | Withdrawn   |
| 497405 | M | Sidamo Region     | HE Qualification    | 1 | 60  | N | Withdrawn   |
| 498363 | F | Addis Ababa       | Lower Than A Level  | 2 | 90  | Y | Pass        |
| 498438 | M | Addis Ababa       | Lower Than A Level  | 0 | 60  | N | Withdrawn   |
| 498582 | M | North Region      | A Level or Higher   | 0 | 60  | N | Withdrawn   |
| 498793 | M | Tigray Region     | Lower Than A Level  | 1 | 240 | Y | Withdrawn   |
| 498905 | F | Sidamo Region     | A Level or Higher   | 0 | 60  | N | Withdrawn   |
| 498980 | M | Oromia Region     | Lower Than A Level  | 0 | 120 | Y | Fail        |
| 501123 | F | South Region      | A Level or Higher   | 0 | 180 | N | Withdrawn   |
| 501487 | M | South West Region | A Level or Higher   | 0 | 60  | N | Distinction |
| 501723 | F | South Region      | A Level or Higher   | 2 | 120 | N | Withdrawn   |
| 501890 | M | Amhara Region     | A Level or Higher   | 0 | 60  | N | Withdrawn   |
| 502004 | M | Amhara Region     | A Level or Higher   | 0 | 60  | N | Pass        |
| 502057 | F | Sidamo Region     | Lower Than A Level  | 1 | 120 | N | Pass        |
| 502161 | M | Addis Ababa       | A Level or Higher   | 1 | 60  | Y | Fail        |
| 502207 | M | North Region      | A Level or Higher   | 2 | 120 | N | Fail        |
| 504089 | M | Amhara Region     | A Level or Higher   | 0 | 60  | N | Fail        |
| 505561 | F | Somalia Region    | Lower Than A Level  | 1 | 120 | Y | Fail        |
| 505815 | M | Sidamo Region     | A Level or Higher   | 0 | 90  | Y | Pass        |
| 505854 | M | Sidamo Region     | A Level or Higher   | 0 | 60  | N | Withdrawn   |
| 507812 | F | Sidamo Region     | Lower Than A Level  | 0 | 60  | N | Withdrawn   |
| 508446 | M | Sidamo Region     | Lower Than A Level  | 0 | 60  | Y | Withdrawn   |
| 508594 | M | Sidamo Region     | A Level or Higher   | 0 | 120 | N | Withdrawn   |

|        |   |                         |   |     |   |           |
|--------|---|-------------------------|---|-----|---|-----------|
| 508872 | M | Amhara Re Lower Tha     | 0 | 60  | N | Withdrawn |
| 509100 | F | South Regi Lower Tha    | 0 | 60  | N | Withdrawn |
| 509417 | F | Somalia Re No Formal    | 1 | 60  | N | Withdrawn |
| 511869 | M | North Regi Lower Tha    | 0 | 60  | N | Withdrawn |
| 511890 | M | Sidamo Re A Level or I  | 1 | 120 | Y | Withdrawn |
| 513415 | M | Oromia Re A Level or I  | 1 | 60  | Y | Withdrawn |
| 513687 | M | Amhara Re Lower Tha     | 2 | 120 | N | Pass      |
| 513957 | M | South Regi A Level or I | 1 | 60  | N | Pass      |
| 514277 | F | Afar Regio HE Qualific  | 0 | 120 | N | Withdrawn |
| 515161 | F | North Regi No Formal    | 0 | 60  | N | Fail      |
| 515331 | M | Oromia Re Lower Tha     | 2 | 60  | N | Fail      |
| 516318 | M | Amhara Re Lower Tha     | 1 | 120 | N | Fail      |
| 517864 | M | South Regi A Level or I | 1 | 120 | N | Pass      |
| 518265 | M | Afar Regio Lower Tha    | 0 | 60  | Y | Withdrawn |
| 518330 | F | South Wes A Level or I  | 1 | 90  | N | Withdrawn |
| 520349 | M | South Regi Lower Tha    | 1 | 120 | N | Withdrawn |
| 520962 | F | Oromia Re A Level or I  | 1 | 120 | N | Pass      |
| 521249 | M | South Regi A Level or I | 0 | 60  | N | Withdrawn |
| 522129 | M | Amhara Re A Level or I  | 1 | 120 | N | Withdrawn |
| 522205 | M | North Regi A Level or I | 2 | 60  | N | Fail      |
| 522363 | F | Sidamo Re HE Qualific   | 1 | 120 | N | Withdrawn |
| 522690 | F | Somalia Re A Level or I | 1 | 150 | N | Withdrawn |
| 522840 | F | Addis Abak Lower Tha    | 0 | 60  | N | Pass      |
| 523583 | F | Sidamo Re A Level or I  | 1 | 120 | Y | Fail      |
| 523857 | F | South Regi HE Qualific  | 0 | 120 | Y | Pass      |
| 523978 | F | South Wes Lower Tha     | 1 | 60  | N | Pass      |
| 524109 | M | Sidamo Re HE Qualific   | 0 | 60  | N | Fail      |
| 524137 | F | Amhara Re A Level or I  | 1 | 120 | N | Pass      |
| 525412 | M | Sidamo Re Lower Tha     | 0 | 120 | N | Fail      |
| 525635 | F | Addis Abak A Level or I | 0 | 60  | N | Fail      |
| 526098 | M | North Regi Post Gradu   | 1 | 150 | N | Withdrawn |
| 526175 | M | Sidamo Re Lower Tha     | 0 | 60  | N | Fail      |
| 527242 | F | Afar Regio Lower Tha    | 0 | 90  | N | Withdrawn |
| 527323 | F | Sidamo Re Lower Tha     | 3 | 90  | N | Fail      |
| 528330 | M | South Regi A Level or I | 0 | 120 | N | Withdrawn |
| 528699 | M | South Regi A Level or I | 0 | 60  | N | Withdrawn |
| 528822 | M | Amhara Re Lower Tha     | 0 | 60  | N | Withdrawn |
| 529190 | M | South Regi Lower Tha    | 0 | 60  | N | Pass      |
| 531069 | M | Addis Abak Lower Tha    | 2 | 120 | Y | Withdrawn |
| 531234 | F | South Regi Lower Tha    | 1 | 120 | N | Pass      |
| 531243 | M | Oromia Re HE Qualific   | 0 | 60  | N | Withdrawn |
| 531340 | F | Addis Abak Lower Tha    | 2 | 60  | N | Withdrawn |
| 532194 | M | North Regi A Level or I | 0 | 120 | N | Withdrawn |
| 532988 | M | South Wes A Level or I  | 1 | 60  | N | Fail      |
| 533012 | M | Afar Regio A Level or I | 0 | 90  | N | Fail      |
| 534201 | F | South Wes A Level or I  | 0 | 60  | N | Pass      |
| 536794 | M | South Wes Lower Tha     | 0 | 210 | N | Withdrawn |

|        |   |                          |   |     |   |             |
|--------|---|--------------------------|---|-----|---|-------------|
| 536941 | F | Addis Abat A Level or I  | 0 | 60  | N | Pass        |
| 536999 | M | North Regi Lower Tha     | 1 | 60  | Y | Withdrawn   |
| 537238 | F | South Regi A Level or I  | 0 | 180 | N | Withdrawn   |
| 537756 | F | Sidamo Re A Level or I   | 0 | 270 | N | Pass        |
| 539060 | F | South Wes Lower Tha      | 0 | 120 | Y | Withdrawn   |
| 539186 | F | Somalia Re A Level or I  | 2 | 120 | N | Fail        |
| 539451 | M | Sidamo Re Lower Tha      | 0 | 60  | N | Pass        |
| 539588 | F | Oromia Re A Level or I   | 0 | 60  | N | Fail        |
| 539872 | F | South Regi A Level or I  | 1 | 120 | N | Withdrawn   |
| 540758 | F | South Regi Lower Tha     | 2 | 90  | N | Pass        |
| 541000 | F | Amhara Re A Level or I   | 0 | 60  | N | Pass        |
| 541765 | M | Oromia Re A Level or I   | 0 | 120 | N | Pass        |
| 543356 | F | South Wes Lower Tha      | 0 | 210 | N | Withdrawn   |
| 543361 | F | Sidamo Re A Level or I   | 0 | 60  | N | Withdrawn   |
| 543789 | F | Sidamo Re A Level or I   | 0 | 60  | N | Distinction |
| 543976 | F | Somalia Re Lower Tha     | 0 | 60  | N | Withdrawn   |
| 544499 | F | Tigrai Regi Lower Tha    | 2 | 180 | N | Withdrawn   |
| 544587 | F | Oromia Re Lower Tha      | 1 | 120 | Y | Fail        |
| 545387 | M | Sidamo Re A Level or I   | 1 | 60  | N | Withdrawn   |
| 546025 | F | Tigrai Regi Lower Tha    | 0 | 60  | N | Fail        |
| 546040 | M | Somalia Re HE Qualific   | 0 | 120 | N | Fail        |
| 546299 | M | South Regi Lower Tha     | 0 | 60  | N | Withdrawn   |
| 546403 | M | Amhara Re Lower Tha      | 2 | 240 | N | Withdrawn   |
| 546584 | M | South Regi A Level or I  | 0 | 60  | N | Pass        |
| 546654 | M | Somalia Re A Level or I  | 1 | 60  | Y | Distinction |
| 547629 | F | Somalia Re Lower Tha     | 1 | 60  | N | Withdrawn   |
| 547786 | M | Afar Regio HE Qualific   | 0 | 120 | N | Withdrawn   |
| 547816 | F | Amhara Re Lower Tha      | 1 | 210 | N | Withdrawn   |
| 547860 | F | Sidamo Re A Level or I   | 0 | 180 | N | Withdrawn   |
| 548292 | M | Addis Abat A Level or I  | 0 | 60  | N | Pass        |
| 548371 | M | Amhara Re A Level or I   | 1 | 60  | N | Fail        |
| 548500 | M | Tigrai Regi A Level or I | 1 | 120 | N | Withdrawn   |
| 549160 | M | Addis Abat A Level or I  | 1 | 120 | N | Withdrawn   |
| 549785 | F | South Regi Lower Tha     | 0 | 60  | N | Withdrawn   |
| 550046 | M | South Regi A Level or I  | 0 | 60  | N | Distinction |
| 550638 | F | North Regi A Level or I  | 0 | 60  | N | Fail        |
| 550893 | M | North Regi A Level or I  | 1 | 90  | N | Fail        |
| 551109 | F | North Regi Lower Tha     | 0 | 210 | N | Withdrawn   |
| 551171 | F | South Wes Lower Tha      | 0 | 120 | N | Pass        |
| 551340 | M | South Regi Lower Tha     | 0 | 120 | Y | Withdrawn   |
| 551427 | F | Addis Abat A Level or I  | 0 | 60  | N | Fail        |
| 551814 | M | Amhara Re Lower Tha      | 0 | 90  | N | Pass        |
| 552003 | F | Sidamo Re A Level or I   | 1 | 120 | N | Distinction |
| 552255 | M | Amhara Re A Level or I   | 1 | 90  | N | Pass        |
| 552908 | M | Amhara Re Lower Tha      | 1 | 120 | N | Withdrawn   |
| 554065 | M | North Regi Lower Tha     | 1 | 60  | N | Distinction |
| 554444 | F | South Regi Lower Tha     | 1 | 120 | N | Withdrawn   |

|        |   |                          |   |     |   |             |
|--------|---|--------------------------|---|-----|---|-------------|
| 554585 | M | Somalia Re Lower Than    | 0 | 60  | N | Withdrawn   |
| 554588 | F | North Regi HE Qualific   | 1 | 90  | N | Fail        |
| 554712 | M | South Regi A Level or I  | 0 | 120 | N | Withdrawn   |
| 555132 | M | South Regi A Level or I  | 0 | 60  | N | Withdrawn   |
| 555137 | F | Afar Regio Lower Than    | 2 | 150 | N | Fail        |
| 555408 | M | South Regi A Level or I  | 2 | 150 | N | Fail        |
| 555446 | M | Addis Abak Lower Than    | 1 | 60  | N | Fail        |
| 556007 | F | Addis Abak A Level or I  | 0 | 90  | N | Withdrawn   |
| 556057 | F | Sidamo Re Lower Than     | 0 | 60  | N | Pass        |
| 556170 | M | Sidamo Re Lower Than     | 1 | 120 | N | Withdrawn   |
| 556171 | M | South Regi Lower Than    | 0 | 60  | N | Fail        |
| 556370 | M | Afar Regio HE Qualific   | 2 | 120 | N | Fail        |
| 556374 | M | Tigrai Regi Lower Than   | 0 | 60  | N | Withdrawn   |
| 556416 | M | Oromia Re Lower Than     | 0 | 60  | Y | Distinction |
| 556836 | M | Addis Abak A Level or I  | 0 | 150 | N | Withdrawn   |
| 557404 | F | South Regi HE Qualific   | 0 | 60  | N | Pass        |
| 557751 | M | Somalia Re A Level or I  | 1 | 60  | N | Withdrawn   |
| 558029 | M | Afar Regio HE Qualific   | 1 | 120 | N | Pass        |
| 558292 | M | South Regi A Level or I  | 0 | 180 | N | Pass        |
| 558629 | M | South Wes Lower Than     | 0 | 60  | N | Fail        |
| 558705 | M | South Regi A Level or I  | 2 | 120 | N | Pass        |
| 559328 | M | South Regi Lower Than    | 0 | 60  | N | Pass        |
| 559872 | M | Somalia Re A Level or I  | 1 | 180 | N | Pass        |
| 560944 | F | Sidamo Re A Level or I   | 0 | 120 | Y | Pass        |
| 561503 | M | North Regi No Formal     | 0 | 120 | N | Withdrawn   |
| 561906 | M | Sidamo Re Lower Than     | 0 | 60  | N | Withdrawn   |
| 561913 | M | Afar Regio HE Qualific   | 0 | 60  | N | Pass        |
| 562112 | F | Somalia Re A Level or I  | 0 | 120 | N | Distinction |
| 562248 | F | Sidamo Re Lower Than     | 0 | 60  | N | Fail        |
| 562632 | F | South Wes Lower Than     | 0 | 60  | N | Pass        |
| 562708 | F | South Regi A Level or I  | 0 | 60  | N | Withdrawn   |
| 562929 | M | Addis Abak Lower Than    | 1 | 120 | N | Fail        |
| 563081 | F | South Regi A Level or I  | 0 | 60  | N | Pass        |
| 563631 | M | South Regi A Level or I  | 0 | 90  | N | Fail        |
| 563763 | F | Addis Abak Lower Than    | 0 | 60  | Y | Pass        |
| 564081 | M | Addis Abak Lower Than    | 0 | 60  | N | Fail        |
| 564643 | F | North Regi Lower Than    | 0 | 120 | N | Withdrawn   |
| 564712 | F | Somalia Re A Level or I  | 0 | 60  | N | Withdrawn   |
| 564944 | M | Somalia Re A Level or I  | 0 | 60  | N | Withdrawn   |
| 564970 | F | Oromia Re Lower Than     | 0 | 60  | N | Withdrawn   |
| 565158 | F | Afar Regio Lower Than    | 0 | 60  | N | Pass        |
| 565840 | M | Tigrai Regi A Level or I | 0 | 60  | N | Fail        |
| 565851 | M | Afar Regio A Level or I  | 0 | 60  | Y | Fail        |
| 566240 | M | Amhara Re A Level or I   | 0 | 60  | N | Pass        |
| 566652 | M | South Wes Lower Than     | 0 | 60  | N | Fail        |
| 566694 | F | South Regi Lower Than    | 0 | 90  | N | Pass        |
| 566788 | M | Oromia Re A Level or I   | 1 | 240 | N | Pass        |

|        |   |                          |   |     |   |             |
|--------|---|--------------------------|---|-----|---|-------------|
| 567595 | M | Amhara Re Lower Tha      | 0 | 60  | N | Distinction |
| 567808 | F | Tigrai Regi A Level or I | 1 | 180 | N | Fail        |
| 567896 | F | Sidamo Re A Level or I   | 1 | 120 | N | Fail        |
| 568631 | M | Somalia Re A Level or I  | 0 | 60  | N | Withdrawn   |
| 568686 | M | Amhara Re Lower Tha      | 0 | 60  | N | Fail        |
| 569084 | M | Somalia Re Lower Tha     | 0 | 60  | N | Pass        |
| 569706 | M | South Regi A Level or I  | 0 | 120 | Y | Withdrawn   |
| 569944 | M | Sidamo Re No Formal      | 0 | 60  | N | Distinction |
| 570049 | F | Sidamo Re Lower Tha      | 1 | 180 | N | Pass        |
| 570215 | F | Amhara Re Lower Tha      | 0 | 60  | Y | Pass        |
| 571000 | M | Addis Abak Lower Tha     | 1 | 180 | N | Pass        |
| 571008 | M | Sidamo Re Lower Tha      | 0 | 60  | Y | Withdrawn   |
| 571292 | F | Tigrai Regi Lower Tha    | 0 | 60  | N | Withdrawn   |
| 571397 | M | Addis Abak Lower Tha     | 0 | 60  | N | Pass        |
| 572043 | M | North Regi A Level or I  | 0 | 120 | N | Withdrawn   |
| 572235 | F | Afar Regi A Level or I   | 0 | 60  | N | Withdrawn   |
| 572414 | F | South Wes Lower Tha      | 1 | 180 | N | Withdrawn   |
| 572924 | M | Amhara Re Lower Tha      | 0 | 120 | N | Pass        |
| 573126 | F | Oromia Re A Level or I   | 0 | 60  | N | Pass        |
| 573235 | M | Afar Regi HE Qualific    | 1 | 120 | N | Fail        |
| 574190 | F | Addis Abak A Level or I  | 0 | 60  | N | Withdrawn   |
| 574590 | M | South Wes A Level or I   | 0 | 180 | N | Pass        |
| 574909 | M | Oromia Re A Level or I   | 0 | 60  | N | Distinction |
| 575603 | M | South Wes A Level or I   | 0 | 120 | N | Pass        |
| 575773 | M | Sidamo Re Lower Tha      | 1 | 120 | Y | Fail        |
| 575792 | M | Afar Regi HE Qualific    | 0 | 60  | N | Pass        |
| 576041 | M | South Wes A Level or I   | 1 | 120 | N | Pass        |
| 576350 | F | Afar Regi Lower Tha      | 0 | 70  | N | Fail        |
| 576584 | M | South Regi A Level or I  | 0 | 60  | N | Pass        |
| 576827 | F | Addis Abak Lower Tha     | 0 | 120 | N | Withdrawn   |
| 576869 | F | Sidamo Re A Level or I   | 0 | 120 | N | Withdrawn   |
| 577954 | F | South Regi Lower Tha     | 0 | 150 | Y | Withdrawn   |
| 577977 | F | South Regi Lower Tha     | 1 | 180 | N | Withdrawn   |
| 578031 | M | South Wes A Level or I   | 0 | 60  | N | Distinction |
| 578595 | M | Amhara Re HE Qualific    | 0 | 120 | N | Fail        |
| 578815 | M | North Regi Post Gradu    | 0 | 60  | N | Pass        |
| 579134 | F | Sidamo Re Lower Tha      | 0 | 60  | Y | Pass        |
| 579178 | F | Sidamo Re HE Qualific    | 0 | 120 | N | Withdrawn   |
| 579711 | M | Addis Abak HE Qualific   | 0 | 120 | N | Pass        |
| 580912 | M | Afar Regi A Level or I   | 0 | 90  | Y | Pass        |
| 581409 | M | South Regi Lower Tha     | 1 | 120 | Y | Withdrawn   |
| 581648 | F | South Wes A Level or I   | 1 | 180 | N | Distinction |
| 581909 | M | Amhara Re Lower Tha      | 0 | 240 | Y | Fail        |
| 582366 | M | Oromia Re Lower Tha      | 1 | 180 | N | Fail        |
| 582479 | M | South Regi Lower Tha     | 0 | 60  | Y | Pass        |
| 582920 | F | South Wes A Level or I   | 0 | 60  | N | Fail        |
| 583053 | F | Amhara Re A Level or I   | 0 | 60  | N | Pass        |

|        |   |                         |   |     |   |             |
|--------|---|-------------------------|---|-----|---|-------------|
| 583348 | M | South Regi A Level or   | 0 | 120 | N | Withdrawn   |
| 583713 | M | Sidamo Re A Level or    | 0 | 60  | N | Pass        |
| 583775 | M | South Regi Lower Tha    | 1 | 120 | N | Pass        |
| 584077 | M | Amhara Re A Level or    | 1 | 150 | N | Withdrawn   |
| 584082 | F | South Wes Lower Tha     | 1 | 180 | N | Fail        |
| 584089 | M | Sidamo Re HE Qualific   | 0 | 120 | N | Withdrawn   |
| 584660 | M | Somalia Re A Level or   | 0 | 120 | N | Pass        |
| 584952 | M | Amhara Re Lower Tha     | 1 | 120 | N | Withdrawn   |
| 585372 | F | Sidamo Re Lower Tha     | 0 | 60  | N | Withdrawn   |
| 585384 | F | Addis Abak Lower Tha    | 1 | 210 | N | Withdrawn   |
| 585485 | M | Sidamo Re Lower Tha     | 0 | 60  | N | Withdrawn   |
| 585830 | F | Addis Abak A Level or   | 0 | 60  | N | Distinction |
| 586347 | F | Tigrai Regi A Level or  | 0 | 150 | N | Pass        |
| 586369 | M | Somalia Re A Level or   | 0 | 120 | N | Withdrawn   |
| 586537 | M | South Wes A Level or    | 0 | 120 | N | Withdrawn   |
| 586876 | M | Somalia Re A Level or   | 0 | 120 | N | Pass        |
| 586946 | F | South Regi A Level or   | 0 | 120 | N | Withdrawn   |
| 587310 | M | Amhara Re A Level or    | 1 | 120 | N | Withdrawn   |
| 587403 | M | Tigrai Regi A Level or  | 1 | 210 | Y | Withdrawn   |
| 587576 | M | North Regi A Level or   | 1 | 180 | N | Withdrawn   |
| 587633 | M | Sidamo Re Lower Tha     | 1 | 120 | N | Fail        |
| 588059 | F | Somalia Re Lower Tha    | 0 | 90  | Y | Withdrawn   |
| 588182 | M | South Regi Lower Tha    | 0 | 60  | N | Fail        |
| 588198 | F | Tigrai Regi HE Qualific | 0 | 120 | N | Pass        |
| 588397 | M | North Regi A Level or   | 0 | 120 | N | Fail        |
| 588560 | M | Oromia Re A Level or    | 0 | 120 | Y | Withdrawn   |
| 588749 | M | Sidamo Re Lower Tha     | 0 | 60  | N | Withdrawn   |
| 588752 | M | North Regi A Level or   | 0 | 60  | N | Fail        |
| 589445 | M | Oromia Re Lower Tha     | 1 | 120 | N | Withdrawn   |
| 589569 | M | Addis Abak Lower Tha    | 1 | 120 | N | Withdrawn   |
| 589963 | M | Afar Regio Lower Tha    | 1 | 180 | N | Pass        |
| 590410 | F | South Wes A Level or    | 0 | 120 | Y | Withdrawn   |
| 590504 | M | Addis Abak A Level or   | 0 | 60  | N | Fail        |
| 590541 | F | Tigrai Regi A Level or  | 1 | 120 | N | Distinction |
| 590680 | F | Sidamo Re A Level or    | 0 | 60  | N | Pass        |
| 591100 | F | South Wes A Level or    | 0 | 60  | N | Withdrawn   |
| 591448 | F | Sidamo Re A Level or    | 0 | 120 | N | Pass        |
| 591648 | M | Addis Abak Lower Tha    | 1 | 120 | N | Withdrawn   |
| 591654 | M | North Regi A Level or   | 0 | 60  | N | Fail        |
| 591742 | F | Addis Abak HE Qualific  | 0 | 120 | N | Withdrawn   |
| 591852 | F | Afar Regio A Level or   | 1 | 120 | Y | Withdrawn   |
| 592220 | M | Sidamo Re A Level or    | 1 | 120 | N | Fail        |
| 592465 | F | South Wes Lower Tha     | 0 | 60  | N | Pass        |
| 593099 | M | North Regi Lower Tha    | 0 | 90  | N | Withdrawn   |
| 593607 | M | Somalia Re A Level or   | 0 | 60  | N | Pass        |
| 593657 | M | Addis Abak Lower Tha    | 0 | 60  | N | Distinction |
| 594078 | M | North Regi Lower Tha    | 0 | 120 | N | Pass        |

|        |   |                          |   |     |   |             |
|--------|---|--------------------------|---|-----|---|-------------|
| 594407 | F | Oromia Re A Level or l   | 1 | 120 | N | Fail        |
| 595193 | M | South Regi A Level or l  | 0 | 60  | N | Pass        |
| 595342 | M | South Regi A Level or l  | 0 | 60  | N | Withdrawn   |
| 595373 | F | Tigrai Regi A Level or l | 0 | 60  | N | Fail        |
| 596439 | M | South Wes A Level or l   | 0 | 120 | N | Pass        |
| 596465 | F | Sidamo Re A Level or l   | 0 | 60  | N | Pass        |
| 596906 | M | Afar Regioi A Level or l | 1 | 120 | N | Fail        |
| 597242 | F | Somalia Re Lower Than    | 1 | 120 | Y | Withdrawn   |
| 597356 | M | Afar Regioi Lower Than   | 0 | 70  | N | Withdrawn   |
| 597379 | M | Amhara Re Lower Than     | 0 | 120 | N | Withdrawn   |
| 597839 | F | South Wes A Level or l   | 0 | 120 | N | Withdrawn   |
| 598102 | M | Sidamo Re HE Qualific    | 0 | 60  | N | Pass        |
| 598179 | F | Afar Regioi HE Qualific  | 0 | 60  | N | Pass        |
| 598750 | M | Sidamo Re A Level or l   | 0 | 60  | N | Pass        |
| 599134 | M | Oromia Re Lower Than     | 0 | 60  | N | Fail        |
| 599649 | M | Somalia Re HE Qualific   | 1 | 150 | N | Fail        |
| 599789 | F | Afar Regioi HE Qualific  | 0 | 60  | N | Pass        |
| 600130 | F | Sidamo Re A Level or l   | 1 | 180 | N | Withdrawn   |
| 600670 | F | Afar Regioi A Level or l | 0 | 60  | N | Pass        |
| 600767 | M | South Regi A Level or l  | 0 | 60  | N | Pass        |
| 600814 | M | South Wes Lower Than     | 0 | 180 | N | Withdrawn   |
| 600891 | F | Oromia Re A Level or l   | 1 | 120 | N | Pass        |
| 601082 | M | Tigrai Regi Lower Than   | 0 | 60  | N | Pass        |
| 601093 | M | North Regi Lower Than    | 0 | 60  | N | Pass        |
| 601270 | F | Afar Regioi Lower Than   | 1 | 120 | N | Withdrawn   |
| 601329 | F | Oromia Re A Level or l   | 0 | 60  | N | Withdrawn   |
| 601652 | F | Somalia Re Lower Than    | 0 | 60  | N | Withdrawn   |
| 601731 | M | Sidamo Re A Level or l   | 1 | 210 | N | Fail        |
| 601956 | M | Addis Abak A Level or l  | 0 | 60  | N | Pass        |
| 602228 | M | Addis Abak A Level or l  | 0 | 60  | N | Fail        |
| 602365 | M | South Regi Lower Than    | 0 | 60  | N | Pass        |
| 602454 | F | Sidamo Re Lower Than     | 0 | 120 | N | Pass        |
| 602533 | M | South Regi A Level or l  | 0 | 60  | Y | Distinction |
| 603241 | M | North Regi A Level or l  | 0 | 60  | N | Withdrawn   |
| 603302 | M | South Wes A Level or l   | 1 | 120 | Y | Distinction |
| 603559 | M | Afar Regioi Lower Than   | 0 | 60  | N | Fail        |
| 603690 | F | South Regi Lower Than    | 0 | 120 | N | Pass        |
| 604027 | M | Tigrai Regi A Level or l | 1 | 135 | N | Withdrawn   |
| 604398 | F | North Regi No Formal     | 1 | 180 | N | Withdrawn   |
| 604480 | M | South Regi A Level or l  | 0 | 120 | N | Withdrawn   |
| 604704 | F | Afar Regioi A Level or l | 1 | 120 | Y | Withdrawn   |
| 604905 | F | South Wes A Level or l   | 0 | 60  | N | Pass        |
| 605131 | M | South Regi Lower Than    | 0 | 60  | N | Withdrawn   |
| 605596 | M | Addis Abak Lower Than    | 0 | 120 | N | Pass        |
| 605652 | F | South Regi A Level or l  | 1 | 180 | N | Pass        |
| 605695 | F | South Regi A Level or l  | 0 | 60  | N | Pass        |
| 605759 | M | Somalia Re A Level or l  | 0 | 90  | N | Withdrawn   |



|        |   |                          |   |     |   |             |
|--------|---|--------------------------|---|-----|---|-------------|
| 605781 | M | Sidamo Re A Level or I   | 0 | 120 | N | Pass        |
| 605890 | M | Tigrai Regi Lower Tha    | 0 | 60  | N | Fail        |
| 606802 | F | South Regi Lower Tha     | 0 | 60  | N | Withdrawn   |
| 606884 | F | Tigrai Regi Lower Tha    | 0 | 60  | N | Fail        |
| 606905 | F | South Regi A Level or I  | 1 | 120 | N | Withdrawn   |
| 607063 | F | North Regi A Level or I  | 0 | 90  | N | Withdrawn   |
| 607130 | M | Somalia Re Lower Tha     | 0 | 120 | N | Pass        |
| 607214 | F | South Wes Lower Tha      | 0 | 90  | N | Withdrawn   |
| 607462 | M | North Regi Lower Tha     | 0 | 60  | N | Fail        |
| 607572 | M | South Wes A Level or I   | 0 | 60  | N | Fail        |
| 607705 | F | Addis Abak Lower Tha     | 0 | 60  | N | Withdrawn   |
| 607939 | M | South Regi A Level or I  | 0 | 60  | N | Fail        |
| 607946 | M | Sidamo Re Lower Tha      | 1 | 120 | Y | Withdrawn   |
| 608322 | M | South Regi HE Qualific   | 0 | 60  | N | Pass        |
| 608487 | M | Afar Regi A Level or I   | 0 | 120 | N | Pass        |
| 608724 | M | North Regi A Level or I  | 0 | 120 | N | Pass        |
| 608772 | M | Tigrai Regi Lower Tha    | 0 | 150 | Y | Withdrawn   |
| 609019 | M | Tigrai Regi A Level or I | 0 | 120 | N | Fail        |
| 609089 | M | South Wes Lower Tha      | 1 | 120 | N | Withdrawn   |
| 609194 | F | Sidamo Re Lower Tha      | 0 | 120 | N | Pass        |
| 609265 | F | Somalia Re Lower Tha     | 0 | 60  | Y | Pass        |
| 609267 | M | Addis Abak Lower Tha     | 0 | 60  | N | Withdrawn   |
| 609354 | F | Afar Regi Lower Tha      | 0 | 120 | N | Withdrawn   |
| 609570 | F | South Regi HE Qualific   | 0 | 60  | N | Fail        |
| 609573 | M | Addis Abak A Level or I  | 1 | 180 | N | Distinction |
| 609681 | M | Oromia Re A Level or I   | 1 | 180 | N | Withdrawn   |
| 609708 | M | Tigrai Regi A Level or I | 0 | 60  | N | Fail        |
| 609852 | M | North Regi HE Qualific   | 0 | 60  | N | Distinction |
| 609946 | M | South Regi Lower Tha     | 0 | 60  | N | Withdrawn   |
| 610129 | M | South Regi Lower Tha     | 0 | 120 | N | Withdrawn   |
| 610170 | M | South Regi Lower Tha     | 1 | 120 | N | Withdrawn   |
| 610228 | F | North Regi Lower Tha     | 0 | 90  | Y | Withdrawn   |
| 610261 | M | Tigrai Regi Lower Tha    | 0 | 60  | N | Fail        |
| 610285 | M | Oromia Re A Level or I   | 1 | 120 | N | Distinction |
| 610326 | M | Sidamo Re Lower Tha      | 0 | 60  | Y | Pass        |
| 610515 | F | Somalia Re Lower Tha     | 0 | 60  | N | Pass        |
| 610609 | F | South Regi Lower Tha     | 0 | 120 | N | Withdrawn   |
| 610931 | M | South Regi A Level or I  | 0 | 60  | N | Distinction |
| 611377 | F | Addis Abak HE Qualific   | 0 | 60  | N | Pass        |
| 611493 | M | Oromia Re A Level or I   | 0 | 60  | N | Fail        |
| 611520 | M | Amhara Re A Level or I   | 0 | 60  | N | Withdrawn   |
| 611735 | M | Amhara Re Lower Tha      | 0 | 90  | N | Withdrawn   |
| 611800 | M | Somalia Re Lower Tha     | 0 | 60  | N | Withdrawn   |
| 611845 | F | South Regi Lower Tha     | 0 | 60  | N | Fail        |
| 611865 | M | Sidamo Re A Level or I   | 0 | 90  | N | Withdrawn   |
| 611879 | M | Addis Abak A Level or I  | 0 | 60  | N | Pass        |
| 611910 | M | Addis Abak A Level or I  | 0 | 60  | N | Fail        |

|        |   |                                     |   |     |   |             |
|--------|---|-------------------------------------|---|-----|---|-------------|
| 611983 | M | Afar Region Lower Than              | 0 | 60  | N | Fail        |
| 611988 | M | Oromia Region Lower Than            | 0 | 60  | N | Withdrawn   |
| 612000 | F | Oromia Region A Level or Higher     | 0 | 60  | N | Distinction |
| 612026 | M | Oromia Region A Level or Higher     | 0 | 60  | N | Withdrawn   |
| 612111 | F | Addis Ababa Lower Than              | 0 | 60  | N | Withdrawn   |
| 612136 | F | Afar Region Lower Than              | 0 | 75  | N | Pass        |
| 612283 | F | Afar Region Lower Than              | 0 | 90  | N | Withdrawn   |
| 612326 | M | Tigray Region A Level or Higher     | 0 | 60  | N | Distinction |
| 612439 | M | Tigray Region HE Qualification      | 0 | 60  | N | Pass        |
| 612443 | F | South West Region A Level or Higher | 0 | 120 | N | Withdrawn   |
| 612563 | M | South Region A Level or Higher      | 0 | 60  | N | Fail        |
| 612625 | F | Addis Ababa A Level or Higher       | 0 | 60  | N | Fail        |
| 612669 | F | Sidamo Region Lower Than            | 0 | 60  | N | Withdrawn   |
| 612805 | M | Oromia Region HE Qualification      | 0 | 90  | N | Withdrawn   |
| 612822 | M | Amhara Region Lower Than            | 0 | 90  | N | Withdrawn   |
| 612935 | M | Amhara Region HE Qualification      | 0 | 60  | N | Withdrawn   |
| 613063 | M | South Region Lower Than             | 0 | 90  | N | Withdrawn   |
| 613105 | M | Sidamo Region Lower Than            | 0 | 60  | N | Fail        |
| 613107 | F | South West Region A Level or Higher | 0 | 60  | N | Pass        |
| 613313 | M | Afar Region A Level or Higher       | 0 | 60  | N | Distinction |
| 613370 | M | Oromia Region A Level or Higher     | 0 | 60  | N | Distinction |
| 613466 | M | Tigray Region HE Qualification      | 0 | 60  | N | Distinction |
| 613617 | F | Sidamo Region Lower Than            | 0 | 120 | N | Withdrawn   |
| 613667 | M | South Region A Level or Higher      | 0 | 60  | N | Distinction |
| 613834 | M | South Region A Level or Higher      | 0 | 60  | N | Pass        |
| 613876 | M | Afar Region Lower Than              | 0 | 60  | Y | Fail        |
| 614025 | M | Tigray Region A Level or Higher     | 0 | 60  | N | Withdrawn   |
| 614074 | M | North Region Lower Than             | 0 | 70  | N | Pass        |
| 614176 | M | Addis Ababa HE Qualification        | 0 | 60  | N | Pass        |
| 614217 | M | South West Region HE Qualification  | 0 | 60  | N | Withdrawn   |
| 614241 | F | Addis Ababa Lower Than              | 0 | 60  | Y | Fail        |
| 614265 | M | South Region Lower Than             | 0 | 120 | Y | Distinction |
| 614406 | F | Afar Region HE Qualification        | 0 | 60  | N | Withdrawn   |
| 614471 | F | Oromia Region Lower Than            | 0 | 60  | N | Withdrawn   |
| 614633 | M | Sidamo Region A Level or Higher     | 0 | 90  | N | Withdrawn   |
| 614649 | M | Tigray Region Lower Than            | 0 | 60  | N | Fail        |
| 614650 | F | Afar Region HE Qualification        | 0 | 60  | N | Withdrawn   |
| 614804 | M | Afar Region A Level or Higher       | 0 | 90  | Y | Pass        |
| 614808 | M | South Region A Level or Higher      | 0 | 60  | N | Pass        |
| 614879 | M | Amhara Region Lower Than            | 0 | 120 | N | Withdrawn   |
| 614930 | M | Sidamo Region A Level or Higher     | 0 | 60  | N | Withdrawn   |
| 614949 | F | Afar Region HE Qualification        | 0 | 60  | N | Pass        |
| 615075 | M | Addis Ababa A Level or Higher       | 0 | 60  | N | Distinction |
| 615184 | M | Sidamo Region Lower Than            | 0 | 90  | N | Fail        |
| 615438 | F | Addis Ababa Lower Than              | 0 | 60  | N | Withdrawn   |
| 616166 | M | Sidamo Region A Level or Higher     | 0 | 60  | N | Withdrawn   |
| 616334 | M | North Region Lower Than             | 0 | 90  | N | Fail        |

|        |   |                          |   |     |   |             |
|--------|---|--------------------------|---|-----|---|-------------|
| 616388 | F | Somalia Re A Level or I  | 0 | 60  | N | Withdrawn   |
| 616542 | M | South Regi A Level or I  | 0 | 70  | N | Pass        |
| 616658 | M | North Regi Lower Tha     | 0 | 70  | N | Pass        |
| 616684 | M | Somalia Re Lower Tha     | 0 | 60  | N | Withdrawn   |
| 616862 | F | Amhara Re A Level or I   | 0 | 60  | Y | Withdrawn   |
| 616870 | M | Sidamo Re Lower Tha      | 0 | 60  | N | Pass        |
| 616874 | F | Addis Abak A Level or I  | 0 | 60  | Y | Withdrawn   |
| 616952 | F | North Regi Lower Tha     | 0 | 60  | N | Pass        |
| 617265 | M | Addis Abak Lower Tha     | 0 | 60  | N | Withdrawn   |
| 617327 | F | South Regi A Level or I  | 0 | 60  | N | Pass        |
| 617350 | M | Oromia Re Lower Tha      | 0 | 90  | N | Withdrawn   |
| 617401 | M | Amhara Re A Level or I   | 0 | 60  | N | Withdrawn   |
| 617442 | M | South Regi A Level or I  | 0 | 60  | N | Pass        |
| 617619 | M | Afar Regioi HE Qualific  | 0 | 120 | N | Fail        |
| 617699 | F | Afar Regioi HE Qualific  | 0 | 60  | N | Pass        |
| 617771 | F | Afar Regioi A Level or I | 0 | 60  | N | Withdrawn   |
| 617781 | M | North Regi HE Qualific   | 0 | 90  | N | Pass        |
| 617801 | M | Addis Abak A Level or I  | 0 | 60  | N | Pass        |
| 617880 | F | North Regi HE Qualific   | 0 | 60  | N | Pass        |
| 617897 | M | South Wes Lower Tha      | 0 | 60  | N | Fail        |
| 618131 | M | South Regi A Level or I  | 0 | 60  | N | Fail        |
| 618171 | M | Somalia Re Lower Tha     | 0 | 90  | N | Fail        |
| 618295 | M | South Regi HE Qualific   | 0 | 60  | N | Pass        |
| 618300 | F | Addis Abak Lower Tha     | 0 | 120 | N | Withdrawn   |
| 618377 | M | South Wes A Level or I   | 0 | 60  | N | Pass        |
| 618583 | F | Addis Abak A Level or I  | 0 | 90  | Y | Withdrawn   |
| 618649 | F | South Wes A Level or I   | 0 | 90  | Y | Pass        |
| 618675 | M | Tigrai Regio Lower Tha   | 0 | 60  | N | Fail        |
| 618682 | F | South Regi Lower Tha     | 0 | 60  | Y | Withdrawn   |
| 618683 | M | Tigrai Regio HE Qualific | 0 | 60  | N | Distinction |
| 618696 | M | South Wes A Level or I   | 0 | 60  | N | Fail        |
| 618845 | F | Somalia Re A Level or I  | 0 | 60  | N | Pass        |
| 618913 | M | Somalia Re Lower Tha     | 0 | 60  | N | Withdrawn   |
| 618937 | M | Somalia Re A Level or I  | 0 | 60  | N | Pass        |
| 618940 | F | Afar Regioi HE Qualific  | 0 | 60  | N | Distinction |
| 618963 | F | Addis Abak Lower Tha     | 0 | 60  | N | Withdrawn   |
| 618968 | M | Oromia Re A Level or I   | 0 | 60  | Y | Withdrawn   |
| 618998 | M | Addis Abak Lower Tha     | 0 | 60  | N | Fail        |
| 619015 | F | South Regi HE Qualific   | 0 | 60  | N | Withdrawn   |
| 619297 | F | North Regi Lower Tha     | 0 | 60  | N | Pass        |
| 619359 | M | Addis Abak HE Qualific   | 0 | 60  | Y | Distinction |
| 619382 | M | South Wes HE Qualific    | 0 | 60  | N | Withdrawn   |
| 619403 | F | Afar Regioi HE Qualific  | 0 | 60  | N | Pass        |
| 619851 | F | North Regi A Level or I  | 0 | 60  | N | Withdrawn   |
| 619908 | M | South Regi Lower Tha     | 0 | 60  | N | Withdrawn   |
| 619939 | F | Afar Regioi Lower Tha    | 0 | 75  | N | Fail        |
| 619964 | F | Sidamo Re A Level or I   | 0 | 60  | Y | Withdrawn   |

|        |   |                          |   |     |   |             |
|--------|---|--------------------------|---|-----|---|-------------|
| 620060 | F | South Regi A Level or I  | 0 | 60  | N | Withdrawn   |
| 620102 | M | Afar Regio Lower Tha     | 0 | 60  | N | Fail        |
| 620106 | M | Amhara Re A Level or I   | 0 | 60  | N | Withdrawn   |
| 620159 | M | South Wes HE Qualific    | 0 | 60  | N | Pass        |
| 620231 | M | Afar Regio HE Qualific   | 0 | 60  | N | Pass        |
| 620243 | M | South Wes Lower Tha      | 0 | 90  | N | Pass        |
| 620337 | F | Addis Abat HE Qualific   | 0 | 120 | N | Fail        |
| 620393 | M | North Regi A Level or I  | 0 | 60  | N | Withdrawn   |
| 620437 | F | South Regi A Level or I  | 0 | 60  | N | Fail        |
| 620508 | M | South Regi Lower Tha     | 0 | 90  | N | Withdrawn   |
| 620608 | F | Amhara Re A Level or I   | 0 | 60  | N | Fail        |
| 620630 | M | Addis Abat Lower Tha     | 0 | 60  | N | Pass        |
| 620658 | M | South Wes A Level or I   | 0 | 60  | N | Pass        |
| 620734 | M | South Regi HE Qualific   | 0 | 60  | N | Distinction |
| 620793 | F | Addis Abat A Level or I  | 0 | 60  | N | Withdrawn   |
| 620820 | M | South Regi A Level or I  | 0 | 60  | N | Distinction |
| 620892 | M | South Regi Lower Tha     | 0 | 60  | N | Fail        |
| 620925 | F | Tigrai Regi A Level or I | 0 | 60  | N | Withdrawn   |
| 620951 | M | Afar Regio Lower Tha     | 0 | 60  | N | Withdrawn   |
| 620974 | F | South Wes A Level or I   | 0 | 90  | Y | Withdrawn   |
| 621004 | M | Sidamo Re A Level or I   | 0 | 60  | N | Pass        |
| 621010 | M | South Regi Lower Tha     | 0 | 60  | N | Pass        |
| 621300 | M | Sidamo Re A Level or I   | 0 | 90  | N | Distinction |
| 621352 | M | South Wes A Level or I   | 0 | 60  | N | Fail        |
| 621384 | M | Sidamo Re Lower Tha      | 0 | 60  | N | Fail        |
| 621442 | M | Tigrai Regi Lower Tha    | 0 | 60  | N | Pass        |
| 621457 | M | Amhara Re A Level or I   | 0 | 60  | Y | Distinction |
| 621615 | M | Afar Regio HE Qualific   | 0 | 60  | N | Distinction |
| 621659 | F | Oromia Re Lower Tha      | 0 | 60  | N | Withdrawn   |
| 621675 | M | South Regi Lower Tha     | 0 | 120 | N | Withdrawn   |
| 621699 | F | Somalia Re Lower Tha     | 0 | 60  | N | Pass        |
| 621883 | M | Amhara Re Lower Tha      | 0 | 60  | N | Distinction |
| 621908 | M | Amhara Re Lower Tha      | 0 | 60  | N | Fail        |
| 622086 | M | Amhara Re HE Qualific    | 0 | 60  | N | Pass        |
| 622175 | F | Amhara Re A Level or I   | 0 | 120 | N | Fail        |
| 622192 | F | Afar Regio A Level or I  | 0 | 60  | N | Distinction |
| 622199 | M | South Wes A Level or I   | 0 | 60  | N | Withdrawn   |
| 622207 | M | South Regi Lower Tha     | 0 | 60  | N | Fail        |
| 622215 | F | South Regi A Level or I  | 0 | 90  | N | Pass        |
| 622225 | M | South Regi A Level or I  | 0 | 60  | Y | Fail        |
| 622256 | M | Somalia Re A Level or I  | 0 | 60  | N | Withdrawn   |
| 622281 | M | Somalia Re A Level or I  | 0 | 60  | Y | Withdrawn   |
| 622333 | M | Amhara Re A Level or I   | 0 | 60  | N | Withdrawn   |
| 622413 | F | South Regi Lower Tha     | 0 | 60  | N | Pass        |
| 622435 | M | Somalia Re A Level or I  | 0 | 60  | N | Fail        |
| 622499 | M | Sidamo Re A Level or I   | 0 | 60  | N | Withdrawn   |
| 622541 | M | Afar Regio HE Qualific   | 0 | 60  | N | Pass        |

|        |   |                          |   |     |   |             |
|--------|---|--------------------------|---|-----|---|-------------|
| 622571 | M | Oromia Re A Level or I   | 0 | 60  | N | Fail        |
| 622614 | M | South Wes Lower Tha      | 0 | 60  | N | Fail        |
| 622626 | F | Oromia Re A Level or I   | 0 | 120 | N | Withdrawn   |
| 622630 | M | Sidamo Re A Level or I   | 0 | 60  | N | Withdrawn   |
| 622657 | M | South Regi Lower Tha     | 0 | 60  | N | Fail        |
| 622672 | M | Amhara Re Lower Tha      | 0 | 60  | N | Withdrawn   |
| 622724 | M | Oromia Re Lower Tha      | 0 | 60  | N | Pass        |
| 622764 | F | Addis Abak A Level or I  | 0 | 60  | N | Distinction |
| 622790 | M | Oromia Re HE Qualific    | 0 | 60  | N | Withdrawn   |
| 622792 | M | North Regi A Level or I  | 0 | 60  | N | Fail        |
| 622844 | F | Oromia Re A Level or I   | 0 | 60  | N | Withdrawn   |
| 622851 | M | South Wes A Level or I   | 0 | 60  | N | Fail        |
| 622873 | F | Somalia Re Lower Tha     | 0 | 60  | Y | Withdrawn   |
| 622900 | F | Sidamo Re HE Qualific    | 0 | 60  | N | Fail        |
| 622968 | F | Somalia Re A Level or I  | 0 | 60  | N | Withdrawn   |
| 623008 | M | Sidamo Re A Level or I   | 0 | 60  | Y | Pass        |
| 623015 | F | Tigrai Regi A Level or I | 0 | 90  | N | Fail        |
| 623052 | F | Sidamo Re A Level or I   | 0 | 90  | N | Withdrawn   |
| 623073 | F | North Regi A Level or I  | 0 | 60  | N | Pass        |
| 623099 | M | Afar Regio A Level or I  | 0 | 60  | N | Withdrawn   |
| 623164 | F | South Regi A Level or I  | 0 | 60  | N | Pass        |
| 623210 | M | Somalia Re A Level or I  | 0 | 60  | N | Fail        |
| 623257 | M | Sidamo Re A Level or I   | 0 | 60  | N | Withdrawn   |
| 623332 | M | Afar Regio A Level or I  | 0 | 120 | N | Withdrawn   |
| 623347 | M | South Wes Post Gradu     | 0 | 90  | N | Distinction |
| 623514 | F | South Regi HE Qualific   | 0 | 60  | N | Pass        |
| 623541 | M | Tigrai Regi A Level or I | 0 | 60  | N | Pass        |
| 623585 | M | Amhara Re Lower Tha      | 0 | 60  | N | Pass        |
| 623601 | M | Addis Abak Lower Tha     | 0 | 60  | N | Withdrawn   |
| 623740 | M | Sidamo Re A Level or I   | 0 | 60  | N | Withdrawn   |
| 623815 | F | Amhara Re A Level or I   | 0 | 90  | N | Pass        |
| 623826 | M | South Regi A Level or I  | 0 | 90  | N | Distinction |
| 623829 | F | North Regi Lower Tha     | 0 | 60  | N | Withdrawn   |
| 623834 | M | South Regi Lower Tha     | 0 | 60  | Y | Withdrawn   |
| 623917 | M | South Regi Lower Tha     | 0 | 120 | N | Fail        |
| 623931 | F | Sidamo Re HE Qualific    | 0 | 60  | N | Pass        |
| 623932 | M | Sidamo Re A Level or I   | 0 | 60  | N | Fail        |
| 623997 | M | North Regi Lower Tha     | 0 | 60  | N | Withdrawn   |
| 624007 | M | Afar Regio A Level or I  | 0 | 60  | N | Pass        |
| 624052 | M | South Regi A Level or I  | 0 | 60  | N | Pass        |
| 624068 | M | Oromia Re Lower Tha      | 0 | 60  | N | Withdrawn   |
| 624077 | F | North Regi HE Qualific   | 0 | 60  | N | Distinction |
| 624078 | F | Addis Abak A Level or I  | 0 | 60  | N | Fail        |
| 624093 | M | Sidamo Re A Level or I   | 0 | 60  | N | Withdrawn   |
| 624105 | M | Oromia Re Lower Tha      | 0 | 60  | N | Fail        |
| 624156 | M | South Regi A Level or I  | 0 | 60  | N | Pass        |
| 624358 | F | Amhara Re Lower Tha      | 0 | 60  | N | Pass        |

|        |   |                          |   |     |   |             |
|--------|---|--------------------------|---|-----|---|-------------|
| 624407 | M | Addis Abat A Level or I  | 0 | 120 | N | Fail        |
| 624476 | F | Tigrai Regi A Level or I | 0 | 60  | N | Withdrawn   |
| 624492 | M | Sidamo Re Lower Tha      | 0 | 60  | N | Withdrawn   |
| 624493 | M | Amhara Re Lower Tha      | 0 | 60  | N | Distinction |
| 624570 | M | Sidamo Re Lower Tha      | 0 | 60  | N | Fail        |
| 624585 | M | Addis Abat Lower Tha     | 0 | 60  | N | Pass        |
| 624610 | F | North Regi A Level or I  | 0 | 60  | N | Withdrawn   |
| 624651 | M | North Regi Lower Tha     | 0 | 60  | N | Withdrawn   |
| 624730 | M | Sidamo Re Lower Tha      | 0 | 90  | N | Fail        |
| 624789 | M | Afar Regio HE Qualific   | 0 | 60  | Y | Pass        |
| 624804 | F | Somalia Re A Level or I  | 0 | 60  | N | Pass        |
| 624829 | M | Afar Regio Lower Tha     | 0 | 60  | N | Fail        |
| 624839 | M | Amhara Re Lower Tha      | 0 | 60  | N | Pass        |
| 624881 | F | Afar Regio Post Gradu    | 0 | 60  | N | Pass        |
| 624921 | M | Oromia Re Lower Tha      | 0 | 60  | N | Withdrawn   |
| 624927 | M | Somalia Re HE Qualific   | 0 | 60  | N | Distinction |
| 624944 | F | North Regi Lower Tha     | 0 | 120 | N | Withdrawn   |
| 625035 | M | South Wes Lower Tha      | 0 | 60  | N | Distinction |
| 625080 | M | North Regi Post Gradu    | 0 | 60  | N | Withdrawn   |
| 625098 | M | Addis Abat Lower Tha     | 0 | 60  | N | Fail        |
| 625218 | F | South Regi A Level or I  | 0 | 60  | Y | Distinction |
| 625263 | F | Sidamo Re HE Qualific    | 0 | 60  | N | Pass        |
| 625427 | M | South Regi A Level or I  | 0 | 60  | N | Pass        |
| 625568 | M | South Regi A Level or I  | 0 | 90  | N | Withdrawn   |
| 625613 | M | Sidamo Re Lower Tha      | 0 | 60  | N | Withdrawn   |
| 625615 | M | Sidamo Re A Level or I   | 0 | 60  | N | Fail        |
| 625714 | M | Addis Abat HE Qualific   | 0 | 90  | N | Pass        |
| 625748 | M | Tigrai Regi HE Qualific  | 0 | 60  | N | Pass        |
| 625864 | F | Oromia Re Lower Tha      | 0 | 60  | N | Pass        |
| 625874 | F | Addis Abat A Level or I  | 0 | 60  | N | Withdrawn   |
| 625902 | F | Afar Regio A Level or I  | 0 | 60  | N | Withdrawn   |
| 625913 | F | Oromia Re Lower Tha      | 0 | 60  | N | Withdrawn   |
| 625983 | M | Tigrai Regi Lower Tha    | 0 | 60  | N | Withdrawn   |
| 626018 | F | Amhara Re A Level or I   | 0 | 60  | N | Fail        |
| 626040 | M | South Regi A Level or I  | 0 | 60  | N | Fail        |
| 626049 | M | Amhara Re HE Qualific    | 0 | 60  | N | Withdrawn   |
| 626061 | F | Afar Regio A Level or I  | 0 | 120 | N | Pass        |
| 626114 | F | Afar Regio Lower Tha     | 0 | 60  | Y | Distinction |
| 626146 | F | South Wes A Level or I   | 0 | 60  | N | Pass        |
| 626172 | F | Somalia Re A Level or I  | 0 | 60  | N | Distinction |
| 626192 | M | South Regi HE Qualific   | 0 | 60  | N | Pass        |
| 626217 | F | Sidamo Re A Level or I   | 0 | 60  | N | Fail        |
| 626238 | M | Tigrai Regi HE Qualific  | 0 | 60  | N | Pass        |
| 626321 | F | Sidamo Re A Level or I   | 0 | 120 | N | Withdrawn   |
| 626348 | M | South Regi A Level or I  | 0 | 60  | N | Withdrawn   |
| 626405 | M | Tigrai Regi A Level or I | 0 | 60  | N | Fail        |
| 626417 | M | Tigrai Regi Lower Tha    | 0 | 90  | N | Distinction |

|        |   |                          |   |     |   |             |
|--------|---|--------------------------|---|-----|---|-------------|
| 626450 | M | South Regi A Level or I  | 0 | 60  | N | Distinction |
| 626546 | M | North Regi A Level or I  | 0 | 60  | N | Withdrawn   |
| 626551 | M | South Wes A Level or I   | 0 | 60  | N | Distinction |
| 626556 | M | Afar Regio HE Qualific   | 0 | 60  | N | Pass        |
| 626607 | F | South Regi Lower Thar    | 0 | 60  | N | Withdrawn   |
| 626679 | F | Amhara Re Lower Thar     | 0 | 60  | N | Fail        |
| 626723 | F | South Wes A Level or I   | 0 | 60  | N | Fail        |
| 626798 | M | Somalia Re Lower Thar    | 0 | 60  | N | Withdrawn   |
| 626852 | M | Amhara Re Lower Thar     | 0 | 60  | N | Pass        |
| 626885 | M | North Regi A Level or I  | 0 | 60  | N | Pass        |
| 626889 | F | South Wes A Level or I   | 0 | 60  | N | Pass        |
| 626930 | M | Tigrai Regi Lower Thar   | 0 | 90  | N | Withdrawn   |
| 626979 | M | Addis Abak Lower Thar    | 0 | 60  | N | Fail        |
| 627021 | M | Tigrai Regi HE Qualific  | 0 | 60  | N | Pass        |
| 627071 | M | Tigrai Regi A Level or I | 0 | 60  | Y | Withdrawn   |
| 627100 | M | Afar Regio A Level or I  | 0 | 60  | N | Pass        |
| 627173 | F | South Regi A Level or I  | 0 | 120 | N | Fail        |
| 627184 | M | Amhara Re A Level or I   | 0 | 60  | N | Pass        |
| 627276 | F | Afar Regio A Level or I  | 0 | 60  | N | Pass        |
| 627322 | M | Afar Regio HE Qualific   | 0 | 60  | N | Distinction |
| 627333 | M | Oromia Re Lower Thar     | 0 | 120 | N | Pass        |
| 627367 | F | Somalia Re A Level or I  | 0 | 60  | N | Withdrawn   |
| 627370 | M | South Regi Lower Thar    | 0 | 60  | N | Withdrawn   |
| 627397 | M | Afar Regio A Level or I  | 0 | 60  | N | Distinction |
| 627416 | F | South Wes A Level or I   | 0 | 60  | N | Withdrawn   |
| 627536 | M | Sidamo Re HE Qualific    | 0 | 60  | N | Distinction |
| 627581 | M | South Wes Lower Thar     | 0 | 60  | Y | Fail        |
| 627616 | F | North Regi A Level or I  | 0 | 60  | Y | Withdrawn   |
| 627638 | M | Sidamo Re Lower Thar     | 0 | 60  | N | Withdrawn   |
| 627655 | F | Addis Abak A Level or I  | 0 | 60  | N | Fail        |
| 627690 | F | Addis Abak A Level or I  | 0 | 120 | N | Withdrawn   |
| 627772 | F | Oromia Re A Level or I   | 0 | 60  | N | Pass        |
| 627879 | M | South Wes A Level or I   | 0 | 60  | N | Pass        |
| 627882 | F | South Regi A Level or I  | 0 | 60  | N | Distinction |
| 627891 | M | Oromia Re A Level or I   | 0 | 60  | N | Pass        |
| 627924 | M | Afar Regio HE Qualific   | 0 | 60  | N | Withdrawn   |
| 628008 | M | Oromia Re Lower Thar     | 0 | 60  | N | Pass        |
| 628099 | M | Somalia Re A Level or I  | 0 | 60  | N | Pass        |
| 628150 | M | Amhara Re Lower Thar     | 0 | 60  | N | Withdrawn   |
| 628216 | M | Oromia Re Lower Thar     | 0 | 60  | Y | Distinction |
| 628246 | M | Sidamo Re A Level or I   | 0 | 60  | N | Pass        |
| 628262 | F | Addis Abak A Level or I  | 0 | 60  | N | Withdrawn   |
| 628333 | F | South Regi A Level or I  | 0 | 60  | Y | Pass        |
| 628347 | F | South Regi A Level or I  | 0 | 60  | N | Pass        |
| 628376 | M | Afar Regio HE Qualific   | 0 | 60  | N | Pass        |
| 628386 | M | South Wes A Level or I   | 0 | 60  | Y | Pass        |
| 628437 | M | South Regi A Level or I  | 0 | 120 | N | Withdrawn   |

|        |   |                          |   |     |   |             |
|--------|---|--------------------------|---|-----|---|-------------|
| 628502 | F | South Regi A Level or I  | 0 | 60  | N | Pass        |
| 628575 | M | Afar Regio A Level or I  | 0 | 90  | N | Distinction |
| 628642 | M | Amhara Re Lower Tha      | 0 | 60  | N | Pass        |
| 628806 | M | South Regi A Level or I  | 0 | 60  | N | Distinction |
| 628835 | F | Oromia Re Lower Tha      | 0 | 60  | N | Pass        |
| 628841 | M | South Regi Lower Tha     | 0 | 120 | Y | Withdrawn   |
| 628858 | M | Addis Abat A Level or I  | 0 | 60  | Y | Withdrawn   |
| 628875 | F | Somalia Re Lower Tha     | 0 | 60  | N | Pass        |
| 628915 | F | Afar Regio HE Qualific   | 0 | 60  | N | Distinction |
| 628947 | M | South Regi A Level or I  | 0 | 60  | N | Withdrawn   |
| 628956 | M | Tigrai Regi A Level or I | 0 | 60  | N | Pass        |
| 629000 | M | Afar Regio A Level or I  | 0 | 60  | Y | Fail        |
| 629039 | M | Afar Regio A Level or I  | 0 | 60  | N | Withdrawn   |
| 629055 | M | South Wes A Level or I   | 0 | 60  | N | Pass        |
| 629316 | F | North Regi A Level or I  | 0 | 90  | N | Fail        |
| 629405 | M | Sidamo Re, A Level or I  | 0 | 60  | N | Pass        |
| 629442 | M | Sidamo Re, Lower Tha     | 0 | 60  | N | Withdrawn   |
| 629452 | M | South Regi HE Qualific   | 0 | 60  | N | Distinction |
| 629454 | M | Addis Abat A Level or I  | 0 | 60  | N | Withdrawn   |
| 629632 | F | Amhara Re A Level or I   | 0 | 90  | Y | Withdrawn   |
| 629673 | M | Addis Abat A Level or I  | 0 | 60  | N | Fail        |
| 629696 | M | Tigrai Regi HE Qualific  | 0 | 90  | N | Distinction |
| 629699 | M | South Wes A Level or I   | 0 | 60  | N | Fail        |
| 629702 | M | Tigrai Regi A Level or I | 0 | 60  | N | Withdrawn   |
| 629706 | M | Afar Regio Lower Tha     | 0 | 60  | N | Withdrawn   |
| 629707 | M | Addis Abat A Level or I  | 0 | 200 | N | Withdrawn   |
| 629710 | M | North Regi HE Qualific   | 0 | 90  | N | Distinction |
| 629713 | M | North Regi Lower Tha     | 0 | 120 | N | Withdrawn   |
| 629725 | M | Amhara Re A Level or I   | 0 | 60  | N | Pass        |
| 629773 | M | Oromia Re A Level or I   | 0 | 90  | Y | Withdrawn   |
| 629822 | M | Addis Abat Lower Tha     | 0 | 60  | Y | Pass        |
| 629876 | M | South Wes Lower Tha      | 0 | 60  | N | Fail        |
| 629877 | M | Sidamo Re, A Level or I  | 0 | 60  | N | Distinction |
| 629898 | F | Amhara Re A Level or I   | 0 | 60  | Y | Pass        |
| 629921 | F | Sidamo Re, A Level or I  | 0 | 60  | N | Pass        |
| 629955 | M | Amhara Re A Level or I   | 0 | 60  | N | Fail        |
| 630009 | F | Amhara Re Lower Tha      | 0 | 60  | N | Withdrawn   |
| 630073 | M | Afar Regio HE Qualific   | 0 | 60  | N | Pass        |
| 630137 | M | North Regi A Level or I  | 0 | 60  | N | Pass        |
| 630152 | M | South Wes A Level or I   | 0 | 90  | N | Fail        |
| 630178 | M | South Regi Lower Tha     | 0 | 90  | N | Pass        |
| 630195 | M | South Regi A Level or I  | 0 | 60  | Y | Withdrawn   |
| 630200 | F | Somalia Re A Level or I  | 0 | 90  | N | Pass        |
| 630301 | M | Sidamo Re, Lower Tha     | 0 | 60  | N | Fail        |
| 630359 | M | Somalia Re A Level or I  | 0 | 60  | N | Withdrawn   |
| 630401 | M | North Regi HE Qualific   | 0 | 60  | N | Withdrawn   |
| 630432 | F | South Wes A Level or I   | 0 | 60  | N | Pass        |



|        |   |                         |   |     |   |             |
|--------|---|-------------------------|---|-----|---|-------------|
| 630531 | M | North Regi Lower Tha    | 0 | 90  | N | Withdrawn   |
| 630556 | M | North Regi Lower Tha    | 0 | 60  | N | Withdrawn   |
| 630596 | F | Oromia Re HE Qualific   | 0 | 60  | N | Distinction |
| 630613 | F | Addis Abak A Level or I | 0 | 90  | N | Pass        |
| 630774 | M | Afar Regio Lower Tha    | 0 | 60  | N | Pass        |
| 630818 | F | Afar Regio Lower Tha    | 0 | 60  | N | Distinction |
| 630935 | M | Sidamo Re Lower Tha     | 0 | 60  | N | Pass        |
| 630939 | M | South Regi Lower Tha    | 0 | 60  | N | Withdrawn   |
| 630948 | F | Oromia Re HE Qualific   | 0 | 60  | N | Pass        |
| 631029 | M | Afar Regio A Level or I | 0 | 60  | N | Fail        |
| 631131 | M | Somalia Re A Level or I | 0 | 120 | N | Pass        |
| 631207 | F | Oromia Re Lower Tha     | 0 | 60  | N | Fail        |
| 631240 | M | South Regi A Level or I | 0 | 60  | N | Withdrawn   |
| 631257 | M | Amhara Re A Level or I  | 0 | 60  | N | Pass        |
| 631299 | M | Amhara Re A Level or I  | 0 | 60  | N | Fail        |
| 631322 | F | North Regi A Level or I | 0 | 60  | N | Pass        |
| 631355 | M | Oromia Re HE Qualific   | 0 | 60  | N | Fail        |
| 631388 | F | North Regi Post Gradu   | 0 | 60  | N | Pass        |
| 631439 | M | North Regi Post Gradu   | 0 | 60  | N | Distinction |
| 631513 | M | Somalia Re A Level or I | 0 | 60  | N | Withdrawn   |
| 631514 | M | Addis Abak Lower Tha    | 0 | 60  | N | Pass        |
| 631527 | M | Sidamo Re Lower Tha     | 0 | 60  | N | Withdrawn   |
| 631560 | M | South Wes A Level or I  | 0 | 60  | N | Withdrawn   |
| 631569 | M | Amhara Re HE Qualific   | 0 | 90  | N | Pass        |
| 631600 | M | South Regi Lower Tha    | 0 | 60  | N | Fail        |
| 631623 | M | South Wes A Level or I  | 0 | 60  | N | Withdrawn   |
| 631630 | F | Addis Abak Lower Tha    | 0 | 60  | N | Withdrawn   |
| 631639 | F | North Regi HE Qualific  | 0 | 60  | N | Pass        |
| 631670 | M | Amhara Re HE Qualific   | 0 | 60  | N | Pass        |
| 631749 | M | Sidamo Re Lower Tha     | 0 | 60  | N | Withdrawn   |
| 631771 | M | Somalia Re HE Qualific  | 0 | 60  | N | Distinction |
| 631813 | M | Amhara Re HE Qualific   | 0 | 60  | N | Fail        |
| 631846 | F | Amhara Re A Level or I  | 0 | 60  | N | Withdrawn   |
| 631851 | M | North Regi HE Qualific  | 0 | 60  | N | Distinction |
| 631945 | F | South Wes HE Qualific   | 0 | 60  | N | Fail        |
| 632115 | M | Amhara Re Lower Tha     | 0 | 60  | N | Fail        |
| 632125 | F | Sidamo Re Lower Tha     | 0 | 60  | N | Fail        |
| 632195 | F | Amhara Re A Level or I  | 0 | 60  | N | Fail        |
| 632205 | M | South Regi A Level or I | 0 | 60  | N | Pass        |
| 632215 | M | South Regi A Level or I | 0 | 60  | N | Distinction |
| 632260 | F | South Wes Lower Tha     | 0 | 150 | N | Withdrawn   |
| 632305 | M | Oromia Re A Level or I  | 0 | 60  | N | Pass        |
| 632314 | F | Addis Abak A Level or I | 0 | 60  | Y | Withdrawn   |
| 632463 | F | Addis Abak Lower Tha    | 0 | 60  | N | Fail        |
| 632469 | F | South Wes Lower Tha     | 0 | 60  | N | Withdrawn   |
| 632473 | F | Afar Regio A Level or I | 0 | 120 | N | Withdrawn   |
| 632482 | M | Oromia Re A Level or I  | 0 | 60  | N | Fail        |

|        |   |                          |   |     |   |             |
|--------|---|--------------------------|---|-----|---|-------------|
| 632486 | F | South Regi A Level or I  | 0 | 90  | N | Withdrawn   |
| 632504 | M | Amhara Re Lower Tha      | 0 | 60  | N | Fail        |
| 632551 | M | Tigrai Regi A Level or I | 0 | 60  | N | Fail        |
| 632680 | F | Addis Abak A Level or I  | 0 | 60  | Y | Distinction |
| 632725 | F | Sidamo Re A Level or I   | 0 | 60  | N | Fail        |
| 632741 | M | Addis Abak A Level or I  | 0 | 60  | N | Pass        |
| 632790 | M | South Wes HE Qualific    | 0 | 60  | N | Pass        |
| 632793 | F | Amhara Re A Level or I   | 0 | 60  | N | Withdrawn   |
| 632814 | F | North Regi Lower Tha     | 0 | 120 | N | Fail        |
| 632845 | F | South Regi HE Qualific   | 0 | 60  | N | Pass        |
| 632856 | M | Sidamo Re A Level or I   | 0 | 90  | N | Withdrawn   |
| 632879 | M | South Regi Lower Tha     | 0 | 60  | N | Withdrawn   |
| 632898 | M | Addis Abak Lower Tha     | 0 | 60  | N | Fail        |
| 632975 | M | Addis Abak Lower Tha     | 0 | 60  | N | Withdrawn   |
| 633008 | M | Tigrai Regi Post Gradu   | 0 | 60  | N | Distinction |
| 633214 | M | Tigrai Regi A Level or I | 0 | 60  | N | Fail        |
| 633273 | F | Addis Abak Lower Tha     | 0 | 60  | N | Withdrawn   |
| 633325 | M | South Regi Lower Tha     | 0 | 60  | N | Pass        |
| 633331 | F | South Regi A Level or I  | 0 | 60  | N | Withdrawn   |
| 633341 | F | Amhara Re A Level or I   | 0 | 90  | N | Withdrawn   |
| 633355 | F | Addis Abak Lower Tha     | 0 | 60  | N | Pass        |
| 633368 | F | North Regi Lower Tha     | 0 | 60  | N | Pass        |
| 633384 | M | Oromia Re Lower Tha      | 0 | 90  | N | Withdrawn   |
| 633467 | M | Addis Abak Lower Tha     | 0 | 60  | N | Pass        |
| 633477 | F | South Regi A Level or I  | 0 | 60  | N | Withdrawn   |
| 633510 | F | Sidamo Re A Level or I   | 0 | 60  | N | Fail        |
| 633591 | F | South Regi A Level or I  | 0 | 60  | N | Pass        |
| 633618 | M | South Regi A Level or I  | 0 | 60  | N | Withdrawn   |
| 633763 | M | South Wes A Level or I   | 0 | 60  | N | Pass        |
| 633764 | F | Oromia Re A Level or I   | 0 | 60  | N | Pass        |
| 633771 | M | Sidamo Re Lower Tha      | 0 | 60  | N | Fail        |
| 633864 | M | Sidamo Re A Level or I   | 0 | 60  | N | Distinction |
| 633921 | M | Addis Abak Lower Tha     | 0 | 60  | N | Pass        |
| 633960 | M | North Regi Post Gradu    | 0 | 60  | N | Distinction |
| 634094 | F | South Regi A Level or I  | 0 | 60  | N | Pass        |
| 634106 | M | South Wes A Level or I   | 0 | 90  | N | Pass        |
| 634107 | F | North Regi HE Qualific   | 0 | 90  | N | Withdrawn   |
| 634108 | F | South Regi A Level or I  | 0 | 60  | N | Withdrawn   |
| 634178 | M | North Regi Lower Tha     | 0 | 60  | N | Pass        |
| 634246 | F | Tigrai Regi A Level or I | 0 | 60  | N | Pass        |
| 634278 | M | North Regi Lower Tha     | 0 | 60  | N | Fail        |
| 634295 | M | Amhara Re HE Qualific    | 0 | 60  | N | Withdrawn   |
| 634313 | M | Amhara Re HE Qualific    | 0 | 60  | N | Withdrawn   |
| 634351 | M | Addis Abak A Level or I  | 0 | 60  | N | Pass        |
| 634360 | M | South Wes Lower Tha      | 0 | 60  | N | Withdrawn   |
| 634383 | M | North Regi A Level or I  | 0 | 60  | N | Distinction |
| 634397 | M | Somalia Re Lower Tha     | 0 | 60  | N | Fail        |

|         |   |                         |   |     |   |             |
|---------|---|-------------------------|---|-----|---|-------------|
| 634420  | F | South Wes Lower Thar    | 0 | 60  | N | Pass        |
| 634508  | M | Sidamo Re A Level or I  | 0 | 60  | N | Withdrawn   |
| 634596  | F | Somalia Re A Level or I | 0 | 60  | N | Pass        |
| 634648  | M | Sidamo Re A Level or I  | 0 | 60  | N | Pass        |
| 634681  | M | South Regi A Level or I | 0 | 120 | N | Distinction |
| 634816  | M | Tigrai Regi HE Qualific | 0 | 120 | N | Withdrawn   |
| 634824  | M | South Regi A Level or I | 0 | 60  | N | Pass        |
| 634905  | M | North Regi HE Qualific  | 0 | 60  | N | Distinction |
| 634909  | M | South Regi A Level or I | 0 | 60  | N | Fail        |
| 635058  | M | Afar Regio A Level or I | 0 | 60  | N | Distinction |
| 635100  | M | Addis Abak A Level or I | 0 | 60  | N | Pass        |
| 635141  | M | Somalia Re HE Qualific  | 0 | 60  | N | Pass        |
| 669530  | F | South Regi HE Qualific  | 0 | 90  | N | Withdrawn   |
| 835603  | M | Amhara Re HE Qualific   | 1 | 150 | N | Withdrawn   |
| 879295  | M | Sidamo Re HE Qualific   | 1 | 60  | N | Distinction |
| 909056  | M | Oromia Re HE Qualific   | 0 | 60  | N | Pass        |
| 963176  | M | South Regi A Level or I | 0 | 60  | N | Withdrawn   |
| 997948  | M | Amhara Re A Level or I  | 1 | 120 | N | Withdrawn   |
| 1031884 | M | Somalia Re A Level or I | 0 | 60  | N | Distinction |
| 1033968 | F | Tigrai Regi No Formal   | 1 | 60  | N | Withdrawn   |
| 1049036 | M | Amhara Re A Level or I  | 0 | 120 | N | Pass        |
| 1175060 | M | Sidamo Re Lower Thar    | 0 | 90  | N | Withdrawn   |
| 1332356 | M | Somalia Re HE Qualific  | 0 | 60  | N | Distinction |
| 1531649 | F | Afar Regio HE Qualific  | 0 | 60  | Y | Withdrawn   |
| 1549107 | M | Amhara Re Lower Thar    | 0 | 60  | N | Pass        |
| 1552044 | M | South Regi A Level or I | 0 | 60  | N | Distinction |
| 1554143 | M | Sidamo Re A Level or I  | 2 | 150 | N | Withdrawn   |
| 1591864 | F | Addis Abak HE Qualific  | 0 | 60  | N | Withdrawn   |
| 1592048 | M | Tigrai Regi HE Qualific | 1 | 120 | N | Distinction |
| 1612600 | M | Oromia Re Lower Thar    | 0 | 90  | N | Pass        |
| 1614808 | F | Addis Abak A Level or I | 0 | 120 | N | Withdrawn   |
| 1624025 | F | Addis Abak A Level or I | 0 | 60  | N | Withdrawn   |
| 1668372 | F | North Regi Lower Thar   | 1 | 60  | N | Withdrawn   |
| 1671208 | M | Afar Regio Lower Thar   | 0 | 60  | N | Withdrawn   |
| 1671761 | M | Addis Abak A Level or I | 0 | 60  | N | Fail        |
| 1671811 | M | South Regi A Level or I | 0 | 90  | N | Pass        |
| 1735651 | M | South Regi Lower Thar   | 0 | 60  | N | Pass        |
| 1735653 | F | Afar Regio A Level or I | 1 | 240 | Y | Pass        |
| 1763186 | M | North Regi Lower Thar   | 0 | 120 | N | Pass        |
| 1767786 | M | Afar Regio HE Qualific  | 0 | 60  | N | Withdrawn   |
| 1777223 | F | Addis Abak Lower Thar   | 0 | 60  | N | Withdrawn   |
| 1804143 | M | Amhara Re A Level or I  | 1 | 60  | Y | Withdrawn   |
| 1826729 | M | South Wes HE Qualific   | 0 | 120 | N | Pass        |
| 1843355 | M | Addis Abak Lower Thar   | 1 | 60  | N | Fail        |
| 1845093 | F | Sidamo Re A Level or I  | 2 | 150 | N | Withdrawn   |
| 1874160 | M | Tigrai Regi Lower Thar  | 0 | 60  | N | Pass        |
| 1903131 | M | Addis Abak Lower Thar   | 1 | 120 | N | Fail        |

|         |   |             |              |   |     |   |             |
|---------|---|-------------|--------------|---|-----|---|-------------|
| 1916140 | F | Sidamo Re   | A Level or l | 0 | 60  | N | Pass        |
| 1939179 | F | Sidamo Re   | Lower Than   | 0 | 210 | N | Fail        |
| 1945434 | F | South Regi  | A Level or l | 0 | 60  | N | Pass        |
| 1951727 | M | Addis Abak  | A Level or l | 0 | 60  | N | Pass        |
| 1962854 | M | Sidamo Re   | A Level or l | 1 | 60  | N | Pass        |
| 1981053 | M | Somalia Re  | A Level or l | 0 | 120 | Y | Withdrawn   |
| 1986370 | F | Afar Regio  | HE Qualific  | 0 | 60  | N | Withdrawn   |
| 1994454 | M | Amhara Re   | Lower Than   | 1 | 60  | Y | Withdrawn   |
| 2001102 | F | Tigrai Regi | Lower Than   | 1 | 120 | Y | Withdrawn   |
| 2002727 | M | Amhara Re   | A Level or l | 1 | 60  | N | Fail        |
| 2043916 | M | Oromia Re   | Lower Than   | 1 | 120 | N | Withdrawn   |
| 2046628 | M | South Wes   | HE Qualific  | 2 | 120 | Y | Withdrawn   |
| 2077023 | M | Oromia Re   | Lower Than   | 0 | 130 | N | Pass        |
| 2080340 | M | Amhara Re   | Lower Than   | 0 | 60  | N | Fail        |
| 2087698 | F | Afar Regio  | Lower Than   | 0 | 60  | N | Distinction |
| 2091387 | M | Sidamo Re   | HE Qualific  | 0 | 90  | N | Distinction |
| 2109013 | F | Afar Regio  | HE Qualific  | 1 | 70  | N | Withdrawn   |
| 2110039 | M | Sidamo Re   | Lower Than   | 1 | 90  | Y | Withdrawn   |
| 2151748 | M | Amhara Re   | Lower Than   | 0 | 60  | Y | Withdrawn   |
| 2162388 | M | Afar Regio  | A Level or l | 0 | 60  | N | Fail        |
| 2172136 | M | Somalia Re  | A Level or l | 0 | 60  | N | Distinction |
| 2173688 | M | South Wes   | Lower Than   | 0 | 60  | N | Fail        |
| 2188469 | F | Afar Regio  | A Level or l | 0 | 75  | Y | Fail        |
| 2210989 | M | Sidamo Re   | A Level or l | 0 | 60  | N | Distinction |
| 2228206 | M | South Regi  | A Level or l | 2 | 170 | N | Withdrawn   |
| 2231018 | M | Amhara Re   | Lower Than   | 0 | 60  | N | Pass        |
| 2261142 | F | Sidamo Re   | A Level or l | 0 | 60  | N | Fail        |
| 2265935 | F | South Regi  | A Level or l | 0 | 60  | N | Withdrawn   |
| 2266889 | M | Addis Abak  | A Level or l | 0 | 60  | N | Pass        |
| 2301511 | F | Sidamo Re   | Lower Than   | 0 | 60  | N | Fail        |
| 2305237 | M | South Wes   | HE Qualific  | 2 | 150 | N | Withdrawn   |
| 2305957 | F | Amhara Re   | HE Qualific  | 1 | 150 | N | Withdrawn   |
| 2306519 | M | Sidamo Re   | HE Qualific  | 0 | 60  | N | Pass        |
| 2312809 | M | South Regi  | Lower Than   | 0 | 60  | N | Pass        |
| 2333244 | F | Tigrai Regi | HE Qualific  | 0 | 60  | N | Withdrawn   |
| 2336922 | F | Oromia Re   | A Level or l | 1 | 120 | N | Pass        |
| 2343809 | F | Sidamo Re   | A Level or l | 1 | 150 | N | Pass        |
| 2348961 | M | Addis Abak  | A Level or l | 0 | 120 | N | Pass        |
| 2352039 | F | Amhara Re   | Lower Than   | 1 | 180 | N | Withdrawn   |
| 2356318 | F | South Wes   | A Level or l | 0 | 60  | Y | Fail        |
| 2357168 | F | South Wes   | Lower Than   | 0 | 120 | Y | Withdrawn   |
| 2365009 | M | South Wes   | Lower Than   | 0 | 90  | N | Withdrawn   |
| 2366701 | F | South Wes   | HE Qualific  | 2 | 180 | Y | Withdrawn   |
| 2371311 | M | Addis Abak  | Lower Than   | 0 | 60  | N | Fail        |
| 2394090 | F | South Regi  | A Level or l | 0 | 90  | N | Distinction |
| 2399951 | F | Somalia Re  | Lower Than   | 1 | 120 | N | Fail        |
| 2411981 | M | Tigrai Regi | A Level or l | 1 | 180 | N | Withdrawn   |

|         |   |                          |   |     |   |             |
|---------|---|--------------------------|---|-----|---|-------------|
| 2414973 | M | North Regi A Level or I  | 1 | 100 | N | Pass        |
| 2415480 | M | Tigrai Regi HE Qualific  | 0 | 90  | N | Distinction |
| 2416424 | F | Amhara Re Lower Than     | 0 | 60  | N | Pass        |
| 2416501 | F | Sidamo Re A Level or I   | 1 | 120 | N | Pass        |
| 2436400 | M | Amhara Re Lower Than     | 1 | 90  | N | Distinction |
| 2444109 | M | Tigrai Regi A Level or I | 0 | 60  | N | Withdrawn   |
| 2446778 | F | Sidamo Re A Level or I   | 2 | 90  | N | Withdrawn   |
| 2450600 | F | Addis Abat Lower Than    | 0 | 60  | N | Distinction |
| 2450650 | F | North Regi A Level or I  | 0 | 60  | N | Pass        |
| 2451003 | M | Sidamo Re Lower Than     | 0 | 60  | N | Pass        |
| 2452902 | F | South Regi Lower Than    | 1 | 120 | Y | Pass        |
| 2460775 | F | South Wes HE Qualific    | 0 | 70  | N | Distinction |
| 2465186 | M | Amhara Re HE Qualific    | 0 | 60  | N | Fail        |
| 2473025 | M | South Wes HE Qualific    | 0 | 120 | N | Pass        |
| 2485856 | F | Afar Regi Lower Than     | 2 | 120 | N | Fail        |
| 2495139 | F | Tigrai Regi Lower Than   | 0 | 120 | N | Fail        |
| 2499850 | M | Sidamo Re HE Qualific    | 1 | 120 | N | Withdrawn   |
| 2502516 | F | South Wes A Level or I   | 0 | 60  | N | Distinction |
| 2502707 | M | Sidamo Re A Level or I   | 2 | 130 | N | Withdrawn   |
| 2503273 | M | Tigrai Regi Lower Than   | 0 | 60  | N | Pass        |
| 2516497 | M | Tigrai Regi A Level or I | 0 | 60  | N | Fail        |
| 2519622 | F | South Wes Lower Than     | 1 | 60  | N | Withdrawn   |
| 2521837 | F | Sidamo Re A Level or I   | 0 | 60  | N | Withdrawn   |
| 2523146 | M | Somalia Re A Level or I  | 2 | 120 | N | Fail        |
| 2527077 | F | Afar Regi HE Qualific    | 0 | 60  | N | Fail        |
| 2533297 | M | South Regi HE Qualific   | 1 | 60  | N | Fail        |
| 2533590 | M | Somalia Re A Level or I  | 0 | 60  | N | Fail        |
| 2544678 | M | Sidamo Re Lower Than     | 0 | 60  | Y | Withdrawn   |
| 2545413 | M | Sidamo Re HE Qualific    | 0 | 60  | N | Fail        |
| 2550946 | F | South Wes Lower Than     | 0 | 60  | N | Distinction |
| 2558463 | M | Sidamo Re Lower Than     | 0 | 60  | N | Pass        |
| 2558536 | M | Amhara Re A Level or I   | 2 | 60  | N | Withdrawn   |
| 2577480 | M | Amhara Re Lower Than     | 1 | 120 | N | Withdrawn   |
| 2588215 | M | Amhara Re Lower Than     | 1 | 120 | Y | Withdrawn   |
| 2588296 | F | South Wes Lower Than     | 0 | 90  | N | Withdrawn   |
| 2588543 | F | Amhara Re A Level or I   | 2 | 60  | Y | Fail        |
| 2595457 | M | Afar Regi HE Qualific    | 0 | 60  | N | Withdrawn   |
| 2595730 | F | South Wes Lower Than     | 0 | 60  | N | Withdrawn   |
| 2599201 | M | North Regi Post Gradu    | 0 | 120 | N | Withdrawn   |
| 2608626 | F | South Regi A Level or I  | 0 | 60  | N | Distinction |
| 2609908 | M | Afar Regi A Level or I   | 0 | 90  | N | Pass        |
| 2610581 | M | South Regi Lower Than    | 0 | 60  | N | Withdrawn   |
| 2611371 | M | South Regi Lower Than    | 1 | 150 | Y | Pass        |
| 2619496 | M | South Regi Post Gradu    | 0 | 60  | N | Distinction |
| 2621984 | M | Sidamo Re A Level or I   | 0 | 60  | N | Withdrawn   |
| 2623532 | F | Sidamo Re A Level or I   | 0 | 60  | N | Withdrawn   |
| 2631092 | F | South Regi A Level or I  | 0 | 90  | N | Withdrawn   |

|         |   |                          |   |     |   |             |
|---------|---|--------------------------|---|-----|---|-------------|
| 2635116 | M | Oromia Re Lower Tha      | 0 | 60  | Y | Withdrawn   |
| 2636552 | F | Oromia Re Lower Tha      | 0 | 90  | Y | Withdrawn   |
| 2637219 | F | Addis Abak A Level or I  | 0 | 120 | N | Distinction |
| 2638464 | M | Sidamo Re HE Qualific    | 0 | 60  | N | Withdrawn   |
| 2639021 | M | South Wes Lower Tha      | 0 | 60  | N | Withdrawn   |
| 2640853 | F | North Regi Lower Tha     | 0 | 60  | N | Fail        |
| 2643028 | F | Oromia Re A Level or I   | 0 | 60  | N | Pass        |
| 2646737 | F | South Regi Lower Tha     | 1 | 120 | Y | Withdrawn   |
| 2648035 | M | Tigrai Regi Lower Tha    | 2 | 120 | N | Pass        |
| 2659530 | F | South Wes A Level or I   | 1 | 70  | Y | Distinction |
| 2660408 | M | Somalia Re A Level or I  | 0 | 60  | N | Pass        |
| 2661162 | M | South Wes HE Qualific    | 0 | 60  | N | Pass        |
| 2668106 | M | Sidamo Re A Level or I   | 0 | 60  | N | Withdrawn   |
| 2669736 | F | Somalia Re Lower Tha     | 0 | 60  | N | Pass        |
| 2669995 | F | Afar Regio HE Qualific   | 0 | 60  | Y | Pass        |
| 2675343 | F | Sidamo Re A Level or I   | 0 | 120 | N | Pass        |
| 2683696 | M | South Regi A Level or I  | 1 | 300 | N | Withdrawn   |
| 2684847 | M | North Regi HE Qualific   | 0 | 70  | N | Pass        |
| 2685827 | F | Somalia Re Lower Tha     | 2 | 120 | N | Pass        |
| 2686365 | M | Addis Abak A Level or I  | 1 | 120 | N | Fail        |
| 2686865 | F | Addis Abak Lower Tha     | 2 | 60  | Y | Pass        |
| 2688692 | M | South Regi A Level or I  | 0 | 60  | N | Pass        |
| 2689501 | F | Somalia Re Lower Tha     | 1 | 60  | Y | Withdrawn   |
| 2692101 | M | Tigrai Regi Lower Tha    | 1 | 90  | N | Fail        |
| 2692577 | M | South Regi Lower Tha     | 0 | 70  | N | Distinction |
| 2692948 | F | South Wes Lower Tha      | 1 | 120 | N | Pass        |
| 2694886 | M | South Wes HE Qualific    | 0 | 60  | N | Pass        |
| 2696376 | F | Sidamo Re Lower Tha      | 3 | 210 | N | Fail        |
| 2698251 | F | South Wes A Level or I   | 0 | 60  | N | Fail        |
| 2710343 | M | Amhara Re Lower Tha      | 1 | 60  | N | Fail        |
| 8462    | M | Sidamo Re HE Qualific    | 1 | 60  | N | Withdrawn   |
| 25572   | F | Sidamo Re HE Qualific    | 2 | 150 | N | Withdrawn   |
| 27417   | M | South Wes Lower Tha      | 1 | 60  | N | Withdrawn   |
| 33387   | M | Afar Regio HE Qualific   | 2 | 90  | N | Fail        |
| 33681   | M | Oromia Re A Level or I   | 3 | 60  | Y | Fail        |
| 33796   | M | Addis Abak Lower Tha     | 2 | 60  | N | Pass        |
| 33897   | M | South Regi Lower Tha     | 1 | 60  | N | Withdrawn   |
| 34087   | M | Oromia Re A Level or I   | 1 | 60  | Y | Fail        |
| 36385   | M | South Regi Lower Tha     | 1 | 120 | Y | Withdrawn   |
| 39208   | F | Tigrai Regi A Level or I | 0 | 120 | N | Withdrawn   |
| 46016   | M | Amhara Re Lower Tha      | 0 | 60  | N | Withdrawn   |
| 46812   | F | North Regi Lower Tha     | 1 | 180 | Y | Withdrawn   |
| 51033   | F | South Regi A Level or I  | 0 | 60  | N | Pass        |
| 51153   | F | Somalia Re HE Qualific   | 0 | 60  | N | Pass        |
| 51253   | F | Amhara Re Lower Tha      | 0 | 120 | N | Withdrawn   |
| 51955   | M | Afar Regio A Level or I  | 0 | 60  | Y | Fail        |
| 53632   | M | Tigrai Regi Lower Tha    | 2 | 60  | N | Fail        |

|        |   |                           |   |     |   |             |
|--------|---|---------------------------|---|-----|---|-------------|
| 54810  | M | South Regi HE Qualific    | 1 | 60  | N | Pass        |
| 58731  | F | South Wes A Level or I    | 1 | 110 | Y | Pass        |
| 63015  | F | Addis Abak Lower Tha      | 1 | 60  | N | Fail        |
| 63827  | M | South Wes Lower Tha       | 1 | 60  | N | Withdrawn   |
| 68417  | M | Afar Regio Lower Tha      | 0 | 60  | N | Pass        |
| 69239  | F | Somalia Re Lower Tha      | 0 | 90  | Y | Withdrawn   |
| 71676  | F | Somalia Re Lower Tha      | 0 | 60  | N | Pass        |
| 73019  | M | Afar Regio HE Qualific    | 0 | 60  | N | Fail        |
| 73664  | M | Amhara Re A Level or I    | 0 | 120 | N | Fail        |
| 75309  | F | Somalia Re A Level or I   | 1 | 180 | N | Withdrawn   |
| 75427  | M | Somalia Re Lower Tha      | 0 | 60  | N | Fail        |
| 76081  | F | Somalia Re Lower Tha      | 1 | 150 | Y | Pass        |
| 80329  | M | South Regi Lower Tha      | 2 | 90  | N | Pass        |
| 80775  | M | Tigrai Regio A Level or I | 0 | 60  | N | Pass        |
| 83553  | M | South Regi Lower Tha      | 1 | 60  | N | Fail        |
| 88439  | F | Addis Abak HE Qualific    | 0 | 60  | N | Pass        |
| 91470  | F | Addis Abak A Level or I   | 0 | 60  | N | Pass        |
| 96874  | F | Oromia Re Lower Tha       | 0 | 90  | N | Fail        |
| 99075  | M | South Regi A Level or I   | 0 | 60  | N | Fail        |
| 99609  | F | Oromia Re Lower Tha       | 0 | 70  | N | Withdrawn   |
| 100561 | M | Addis Abak Lower Tha      | 1 | 60  | N | Fail        |
| 101187 | F | Sidamo Re HE Qualific     | 0 | 120 | N | Withdrawn   |
| 101279 | F | Sidamo Re A Level or I    | 0 | 60  | N | Fail        |
| 102221 | F | Afar Regio HE Qualific    | 0 | 60  | N | Pass        |
| 103891 | M | South Regi HE Qualific    | 1 | 90  | N | Withdrawn   |
| 104215 | M | Afar Regio A Level or I   | 0 | 270 | N | Withdrawn   |
| 104772 | M | South Wes A Level or I    | 1 | 60  | N | Fail        |
| 106553 | F | Sidamo Re Lower Tha       | 0 | 60  | N | Pass        |
| 110524 | M | South Wes Lower Tha       | 0 | 60  | N | Pass        |
| 110640 | F | Addis Abak HE Qualific    | 0 | 120 | N | Pass        |
| 111415 | M | South Regi A Level or I   | 1 | 60  | N | Withdrawn   |
| 111926 | M | Addis Abak Lower Tha      | 2 | 60  | N | Pass        |
| 118578 | F | Afar Regio A Level or I   | 2 | 60  | Y | Withdrawn   |
| 123053 | M | Addis Abak Lower Tha      | 1 | 120 | N | Withdrawn   |
| 123183 | M | Tigrai Regio HE Qualific  | 0 | 60  | N | Pass        |
| 123957 | F | Amhara Re Lower Tha       | 1 | 60  | N | Fail        |
| 124210 | F | Amhara Re A Level or I    | 0 | 120 | N | Withdrawn   |
| 124728 | F | Amhara Re A Level or I    | 1 | 60  | Y | Withdrawn   |
| 125830 | F | South Wes HE Qualific     | 0 | 120 | Y | Withdrawn   |
| 129989 | M | South Wes A Level or I    | 0 | 60  | N | Distinction |
| 131152 | M | Sidamo Re A Level or I    | 0 | 120 | N | Fail        |
| 131612 | M | Sidamo Re A Level or I    | 0 | 60  | N | Pass        |
| 132157 | M | Sidamo Re A Level or I    | 0 | 60  | Y | Fail        |
| 132511 | F | Addis Abak A Level or I   | 0 | 120 | N | Fail        |
| 133365 | F | Somalia Re A Level or I   | 0 | 60  | N | Pass        |
| 134243 | F | Addis Abak A Level or I   | 0 | 90  | N | Pass        |
| 134920 | F | South Regi A Level or I   | 0 | 60  | N | Fail        |

|        |   |                          |   |     |   |             |
|--------|---|--------------------------|---|-----|---|-------------|
| 135999 | M | Oromia Re A Level or I   | 0 | 60  | N | Withdrawn   |
| 136135 | M | Addis Abak A Level or I  | 2 | 90  | N | Pass        |
| 136793 | M | Sidamo Re HE Qualific    | 1 | 60  | N | Pass        |
| 138715 | M | Oromia Re A Level or I   | 1 | 60  | N | Fail        |
| 145188 | M | Tigrai Regi Lower Tha    | 0 | 60  | N | Fail        |
| 145578 | F | Afar Regio HE Qualific   | 0 | 120 | N | Withdrawn   |
| 146943 | F | Amhara Re Lower Tha      | 0 | 120 | Y | Withdrawn   |
| 147328 | F | South Regi A Level or I  | 0 | 60  | N | Pass        |
| 147715 | F | South Regi A Level or I  | 0 | 60  | N | Fail        |
| 148414 | M | South Wes Lower Tha      | 1 | 60  | N | Pass        |
| 151745 | M | Afar Regio A Level or I  | 0 | 90  | N | Pass        |
| 152320 | M | South Regi A Level or I  | 1 | 90  | Y | Pass        |
| 153170 | F | Tigrai Regi A Level or I | 0 | 120 | Y | Pass        |
| 154073 | M | Oromia Re A Level or I   | 0 | 90  | N | Fail        |
| 158575 | M | South Wes Lower Tha      | 0 | 60  | N | Withdrawn   |
| 160181 | M | Somalia Re Lower Tha     | 0 | 60  | N | Withdrawn   |
| 162337 | F | South Regi Lower Tha     | 1 | 120 | N | Fail        |
| 163996 | M | Oromia Re Lower Tha      | 0 | 90  | N | Fail        |
| 167945 | F | Sidamo Re A Level or I   | 0 | 90  | N | Withdrawn   |
| 168843 | F | South Regi A Level or I  | 1 | 120 | N | Withdrawn   |
| 169894 | M | South Wes HE Qualific    | 3 | 60  | N | Pass        |
| 172965 | M | Afar Regio Post Gradu    | 2 | 60  | N | Pass        |
| 175804 | M | South Regi A Level or I  | 1 | 180 | N | Withdrawn   |
| 177781 | M | Afar Regio HE Qualific   | 0 | 60  | N | Fail        |
| 184409 | M | North Regi Lower Tha     | 0 | 60  | N | Distinction |
| 185024 | F | South Regi Lower Tha     | 1 | 60  | Y | Withdrawn   |
| 189143 | F | Oromia Re HE Qualific    | 0 | 120 | N | Distinction |
| 190279 | F | Afar Regio Post Gradu    | 3 | 60  | N | Pass        |
| 191732 | M | Amhara Re Lower Tha      | 0 | 60  | N | Fail        |
| 192375 | F | South Regi HE Qualific   | 0 | 120 | N | Pass        |
| 202138 | F | Sidamo Re A Level or I   | 0 | 90  | N | Withdrawn   |
| 202489 | M | Sidamo Re Lower Tha      | 1 | 120 | N | Withdrawn   |
| 203149 | M | Oromia Re Lower Tha      | 0 | 60  | N | Fail        |
| 204410 | F | South Wes Lower Tha      | 0 | 120 | N | Pass        |
| 204609 | M | Amhara Re HE Qualific    | 1 | 60  | N | Pass        |
| 226895 | M | South Regi HE Qualific   | 1 | 150 | N | Pass        |
| 231697 | M | Amhara Re Lower Tha      | 0 | 60  | N | Withdrawn   |
| 233868 | M | South Regi HE Qualific   | 1 | 60  | N | Fail        |
| 233873 | M | Sidamo Re Lower Tha      | 0 | 60  | N | Pass        |
| 234552 | F | Amhara Re Lower Tha      | 0 | 120 | N | Pass        |
| 235893 | M | Afar Regio HE Qualific   | 0 | 100 | N | Distinction |
| 236017 | F | Sidamo Re A Level or I   | 0 | 120 | Y | Withdrawn   |
| 236150 | F | Tigrai Regi HE Qualific  | 1 | 100 | N | Withdrawn   |
| 240186 | F | Afar Regio HE Qualific   | 0 | 80  | N | Pass        |
| 240236 | F | South Regi A Level or I  | 3 | 60  | Y | Fail        |
| 241066 | F | North Regi HE Qualific   | 1 | 60  | N | Pass        |
| 241769 | F | South Wes Lower Tha      | 0 | 60  | Y | Withdrawn   |



|        |   |                   |                    |   |     |   |             |
|--------|---|-------------------|--------------------|---|-----|---|-------------|
| 243025 | F | Afar Region       | A Level or Higher  | 0 | 60  | Y | Pass        |
| 249359 | M | Afar Region       | Lower Than A Level | 0 | 90  | N | Pass        |
| 253579 | M | North Region      | A Level or Higher  | 1 | 120 | N | Fail        |
| 256144 | M | Sidamo Region     | HE Qualification   | 0 | 60  | N | Pass        |
| 258538 | F | Sidamo Region     | A Level or Higher  | 0 | 60  | N | Pass        |
| 260077 | M | Tigray Region     | A Level or Higher  | 1 | 60  | N | Pass        |
| 260639 | M | Oromia Region     | A Level or Higher  | 2 | 120 | Y | Withdrawn   |
| 264601 | F | Sidamo Region     | A Level or Higher  | 3 | 70  | N | Withdrawn   |
| 267118 | F | South West Region | Lower Than A Level | 1 | 90  | Y | Fail        |
| 268143 | M | Afar Region       | A Level or Higher  | 1 | 60  | N | Pass        |
| 269575 | F | Afar Region       | HE Qualification   | 0 | 60  | N | Withdrawn   |
| 269856 | M | Somalia Region    | A Level or Higher  | 0 | 60  | N | Pass        |
| 270502 | M | Somalia Region    | A Level or Higher  | 0 | 120 | N | Pass        |
| 275297 | M | North Region      | HE Qualification   | 0 | 120 | N | Distinction |
| 275309 | M | Oromia Region     | Lower Than A Level | 1 | 90  | N | Withdrawn   |
| 276935 | F | South Region      | Lower Than A Level | 0 | 60  | N | Pass        |
| 279117 | M | South Region      | HE Qualification   | 0 | 60  | N | Withdrawn   |
| 281172 | F | Somalia Region    | Lower Than A Level | 0 | 60  | N | Pass        |
| 281252 | F | South Region      | Lower Than A Level | 0 | 60  | N | Withdrawn   |
| 281799 | F | Oromia Region     | Lower Than A Level | 0 | 60  | N | Withdrawn   |
| 281920 | M | Oromia Region     | Lower Than A Level | 4 | 60  | N | Pass        |
| 282498 | F | Sidamo Region     | A Level or Higher  | 0 | 60  | N | Withdrawn   |
| 284741 | M | Addis Ababa       | A Level or Higher  | 0 | 120 | N | Withdrawn   |
| 285481 | M | Addis Ababa       | A Level or Higher  | 0 | 60  | N | Pass        |
| 287897 | F | Somalia Region    | Lower Than A Level | 2 | 120 | Y | Withdrawn   |
| 287954 | M | Tigray Region     | A Level or Higher  | 2 | 120 | N | Fail        |
| 288762 | F | Amhara Region     | Lower Than A Level | 0 | 120 | N | Withdrawn   |
| 295118 | F | Tigray Region     | Lower Than A Level | 0 | 180 | N | Pass        |
| 296138 | M | Addis Ababa       | A Level or Higher  | 0 | 60  | N | Distinction |
| 298777 | M | Amhara Region     | A Level or Higher  | 1 | 120 | N | Fail        |
| 300057 | M | Addis Ababa       | A Level or Higher  | 0 | 60  | N | Fail        |
| 301036 | M | South Region      | A Level or Higher  | 3 | 60  | Y | Withdrawn   |
| 303141 | F | Addis Ababa       | Lower Than A Level | 0 | 60  | N | Pass        |
| 303341 | F | Amhara Region     | Lower Than A Level | 0 | 120 | N | Withdrawn   |
| 306754 | M | South Region      | Lower Than A Level | 1 | 120 | Y | Withdrawn   |
| 307116 | F | South Region      | A Level or Higher  | 0 | 100 | Y | Withdrawn   |
| 309258 | M | South West Region | HE Qualification   | 3 | 180 | N | Withdrawn   |
| 309350 | M | Sidamo Region     | Lower Than A Level | 0 | 120 | Y | Withdrawn   |
| 313561 | F | Amhara Region     | HE Qualification   | 0 | 60  | N | Pass        |
| 318919 | F | Afar Region       | HE Qualification   | 0 | 60  | N | Pass        |
| 319325 | M | Sidamo Region     | A Level or Higher  | 0 | 60  | N | Withdrawn   |
| 321952 | F | South Region      | A Level or Higher  | 0 | 120 | N | Fail        |
| 322137 | M | Sidamo Region     | HE Qualification   | 0 | 60  | N | Pass        |
| 323025 | M | South West Region | Lower Than A Level | 0 | 120 | Y | Withdrawn   |
| 323680 | M | Sidamo Region     | Lower Than A Level | 1 | 60  | N | Pass        |
| 324338 | M | Sidamo Region     | A Level or Higher  | 0 | 120 | N | Fail        |
| 328241 | M | Addis Ababa       | A Level or Higher  | 0 | 120 | N | Pass        |

|        |   |                          |   |     |   |             |
|--------|---|--------------------------|---|-----|---|-------------|
| 331526 | F | Amhara Re Lower Thar     | 0 | 120 | N | Withdrawn   |
| 333823 | F | Afar Region A Level or I | 1 | 60  | N | Fail        |
| 334048 | F | Sidamo Re A Level or I   | 1 | 60  | N | Pass        |
| 334581 | M | Somalia Re HE Qualific   | 0 | 90  | N | Distinction |
| 334973 | M | Afar Region HE Qualific  | 0 | 60  | N | Pass        |
| 335018 | F | Sidamo Re Lower Thar     | 2 | 60  | N | Pass        |
| 335922 | M | North Regi A Level or I  | 1 | 60  | N | Withdrawn   |
| 336213 | M | Tigrai Regi A Level or I | 0 | 60  | N | Pass        |
| 336218 | M | Addis Abak Lower Thar    | 0 | 60  | N | Fail        |
| 337048 | M | Sidamo Re A Level or I   | 4 | 120 | N | Withdrawn   |
| 337359 | F | Amhara Re A Level or I   | 0 | 60  | N | Pass        |
| 338704 | F | Sidamo Re Lower Thar     | 0 | 60  | N | Pass        |
| 339853 | F | South Wes Lower Thar     | 0 | 120 | Y | Fail        |
| 340627 | F | Afar Region A Level or I | 0 | 60  | N | Fail        |
| 341855 | F | Amhara Re Lower Thar     | 1 | 60  | N | Fail        |
| 341921 | F | South Regi A Level or I  | 1 | 60  | N | Pass        |
| 348602 | F | South Regi Post Gradu    | 0 | 120 | N | Withdrawn   |
| 349688 | M | North Regi A Level or I  | 0 | 60  | N | Pass        |
| 349910 | M | Addis Abak A Level or I  | 0 | 60  | Y | Pass        |
| 350361 | F | Amhara Re Lower Thar     | 0 | 150 | N | Withdrawn   |
| 351080 | F | Addis Abak A Level or I  | 0 | 60  | N | Fail        |
| 351244 | M | North Regi A Level or I  | 1 | 60  | N | Pass        |
| 352954 | F | Oromia Re A Level or I   | 0 | 120 | N | Withdrawn   |
| 353969 | F | Afar Region HE Qualific  | 0 | 60  | Y | Withdrawn   |
| 355034 | F | South Regi Lower Thar    | 0 | 120 | N | Withdrawn   |
| 356561 | F | Afar Region A Level or I | 0 | 90  | N | Fail        |
| 359657 | M | Amhara Re No Formal      | 0 | 120 | N | Withdrawn   |
| 361842 | M | South Regi Lower Thar    | 1 | 60  | N | Fail        |
| 364307 | F | Sidamo Re A Level or I   | 1 | 150 | N | Withdrawn   |
| 365375 | F | Oromia Re A Level or I   | 0 | 60  | N | Withdrawn   |
| 365893 | M | Amhara Re A Level or I   | 1 | 60  | N | Pass        |
| 367309 | F | North Regi A Level or I  | 0 | 60  | N | Pass        |
| 368195 | M | South Regi Lower Thar    | 0 | 60  | N | Withdrawn   |
| 370089 | M | Afar Region HE Qualific  | 1 | 60  | N | Pass        |
| 370100 | M | Addis Abak A Level or I  | 0 | 60  | N | Withdrawn   |
| 370184 | F | South Wes A Level or I   | 0 | 60  | N | Pass        |
| 370274 | M | South Regi A Level or I  | 0 | 60  | N | Pass        |
| 370375 | M | Tigrai Regi A Level or I | 1 | 60  | N | Fail        |
| 371019 | M | Sidamo Re Lower Thar     | 0 | 60  | N | Pass        |
| 371949 | M | South Regi Lower Thar    | 0 | 60  | Y | Fail        |
| 373280 | M | South Wes A Level or I   | 1 | 120 | N | Fail        |
| 373795 | F | Sidamo Re Lower Thar     | 1 | 60  | N | Withdrawn   |
| 376758 | M | Afar Region A Level or I | 0 | 60  | N | Withdrawn   |
| 378388 | F | Afar Region Lower Thar   | 0 | 60  | N | Withdrawn   |
| 379336 | F | South Regi Lower Thar    | 0 | 120 | N | Pass        |
| 380681 | M | Sidamo Re HE Qualific    | 1 | 60  | N | Withdrawn   |
| 381439 | M | Afar Region HE Qualific  | 0 | 60  | N | Withdrawn   |

|        |   |                          |   |     |   |             |
|--------|---|--------------------------|---|-----|---|-------------|
| 384106 | F | South Regi Lower Tha     | 0 | 120 | N | Withdrawn   |
| 384295 | F | South Wes Lower Tha      | 1 | 90  | N | Fail        |
| 384499 | M | South Wes Lower Tha      | 0 | 60  | Y | Pass        |
| 384999 | F | Sidamo Re HE Qualific    | 1 | 60  | N | Distinction |
| 385019 | F | Tigrai Regi Lower Tha    | 2 | 60  | Y | Fail        |
| 385495 | M | Addis Abat A Level or I  | 1 | 60  | N | Fail        |
| 385563 | M | South Wes A Level or I   | 0 | 120 | N | Pass        |
| 386140 | F | Tigrai Regi Lower Tha    | 1 | 60  | N | Fail        |
| 387359 | M | Oromia Re Lower Tha      | 1 | 60  | N | Pass        |
| 387364 | M | Amhara Re HE Qualific    | 0 | 90  | N | Withdrawn   |
| 389076 | M | South Wes No Formal      | 3 | 120 | N | Withdrawn   |
| 390556 | M | Sidamo Re Post Gradu     | 1 | 60  | N | Distinction |
| 390849 | M | Somalia Re Lower Tha     | 0 | 120 | N | Pass        |
| 392250 | M | Oromia Re A Level or I   | 0 | 120 | N | Withdrawn   |
| 393094 | M | South Regi Lower Tha     | 2 | 150 | N | Withdrawn   |
| 393727 | M | Afar Regioi A Level or I | 0 | 60  | Y | Pass        |
| 395535 | M | Amhara Re A Level or I   | 0 | 60  | Y | Withdrawn   |
| 395980 | F | Somalia Re Lower Tha     | 1 | 60  | N | Withdrawn   |
| 397894 | M | South Regi A Level or I  | 0 | 60  | N | Withdrawn   |
| 398816 | F | Addis Abat A Level or I  | 0 | 60  | N | Pass        |
| 399628 | F | Oromia Re Lower Tha      | 0 | 120 | N | Fail        |
| 399772 | M | Afar Regioi HE Qualific  | 1 | 60  | N | Withdrawn   |
| 399794 | F | Afar Regioi HE Qualific  | 1 | 60  | N | Fail        |
| 400091 | M | North Regi A Level or I  | 1 | 60  | N | Pass        |
| 402268 | M | North Regi Lower Tha     | 0 | 60  | N | Withdrawn   |
| 402829 | F | Addis Abat HE Qualific   | 0 | 60  | N | Withdrawn   |
| 402958 | F | North Regi A Level or I  | 0 | 60  | N | Pass        |
| 403052 | F | Sidamo Re HE Qualific    | 1 | 120 | N | Fail        |
| 406425 | F | South Regi Lower Tha     | 0 | 190 | N | Withdrawn   |
| 407487 | F | South Wes A Level or I   | 1 | 120 | N | Fail        |
| 408344 | F | Afar Regioi A Level or I | 0 | 100 | N | Fail        |
| 409120 | F | Sidamo Re A Level or I   | 1 | 60  | Y | Withdrawn   |
| 409205 | M | Somalia Re A Level or I  | 0 | 90  | N | Pass        |
| 410767 | F | Somalia Re A Level or I  | 1 | 90  | Y | Pass        |
| 411549 | F | Sidamo Re A Level or I   | 0 | 120 | N | Fail        |
| 412717 | M | Tigrai Regi HE Qualific  | 0 | 60  | N | Pass        |
| 413087 | M | Tigrai Regi HE Qualific  | 0 | 90  | N | Fail        |
| 414094 | F | Oromia Re A Level or I   | 0 | 60  | Y | Fail        |
| 414963 | F | Addis Abat A Level or I  | 0 | 60  | N | Pass        |
| 416276 | M | South Regi Lower Tha     | 1 | 120 | Y | Withdrawn   |
| 417157 | M | Sidamo Re Lower Tha      | 0 | 120 | N | Withdrawn   |
| 418851 | M | Oromia Re Lower Tha      | 0 | 60  | N | Withdrawn   |
| 419913 | M | Sidamo Re A Level or I   | 0 | 120 | N | Pass        |
| 420141 | F | Sidamo Re A Level or I   | 0 | 90  | N | Pass        |
| 420344 | F | Sidamo Re HE Qualific    | 0 | 120 | N | Withdrawn   |
| 420560 | F | South Wes A Level or I   | 0 | 120 | N | Pass        |
| 420745 | M | Sidamo Re A Level or I   | 2 | 120 | N | Withdrawn   |

|        |   |                          |   |     |   |             |
|--------|---|--------------------------|---|-----|---|-------------|
| 420762 | M | South Regi HE Qualific   | 0 | 60  | N | Distinction |
| 421185 | F | South Wes A Level or I   | 1 | 60  | N | Pass        |
| 421242 | M | South Wes A Level or I   | 1 | 60  | N | Withdrawn   |
| 422343 | M | South Wes HE Qualific    | 0 | 90  | N | Distinction |
| 423650 | M | Oromia Re Lower Than     | 0 | 60  | N | Withdrawn   |
| 424211 | M | Sidamo Re, A Level or I  | 0 | 60  | Y | Pass        |
| 425393 | F | South Regi HE Qualific   | 1 | 60  | N | Withdrawn   |
| 425910 | F | Sidamo Re, Lower Than    | 0 | 60  | N | Fail        |
| 428116 | F | North Regi A Level or I  | 1 | 60  | N | Pass        |
| 428787 | F | South Regi A Level or I  | 1 | 60  | Y | Withdrawn   |
| 429740 | F | Sidamo Re, Lower Than    | 1 | 120 | N | Withdrawn   |
| 431136 | M | Tigrai Regi A Level or I | 2 | 60  | N | Fail        |
| 432642 | F | North Regi A Level or I  | 0 | 60  | N | Fail        |
| 434002 | F | Sidamo Re, A Level or I  | 1 | 120 | N | Pass        |
| 434767 | M | Addis Abak Lower Than    | 1 | 120 | N | Withdrawn   |
| 435536 | F | South Wes Lower Than     | 0 | 60  | N | Withdrawn   |
| 435572 | M | Sidamo Re, A Level or I  | 1 | 60  | N | Pass        |
| 436898 | F | Afar Regioi A Level or I | 0 | 85  | Y | Distinction |
| 438135 | F | Afar Regioi Lower Than   | 0 | 70  | N | Withdrawn   |
| 441087 | F | South Regi A Level or I  | 0 | 60  | N | Pass        |
| 441354 | M | Afar Regioi HE Qualific  | 0 | 150 | N | Withdrawn   |
| 441897 | F | Amhara Re A Level or I   | 0 | 60  | N | Pass        |
| 442017 | F | Sidamo Re, A Level or I  | 0 | 60  | N | Withdrawn   |
| 442191 | F | Oromia Re Lower Than     | 0 | 120 | Y | Withdrawn   |
| 442549 | M | South Wes A Level or I   | 0 | 60  | N | Fail        |
| 443275 | M | Oromia Re A Level or I   | 0 | 60  | N | Pass        |
| 443539 | F | South Regi HE Qualific   | 0 | 60  | N | Pass        |
| 444180 | F | South Wes Lower Than     | 0 | 60  | Y | Pass        |
| 444388 | M | Amhara Re Lower Than     | 0 | 60  | N | Withdrawn   |
| 444625 | M | Sidamo Re, A Level or I  | 0 | 90  | N | Withdrawn   |
| 444766 | M | Amhara Re A Level or I   | 0 | 120 | N | Pass        |
| 444783 | F | Sidamo Re, HE Qualific   | 0 | 60  | N | Withdrawn   |
| 445239 | M | Amhara Re Lower Than     | 0 | 120 | N | Pass        |
| 445351 | F | South Wes Lower Than     | 0 | 60  | N | Fail        |
| 445429 | M | Sidamo Re, Lower Than    | 0 | 60  | N | Pass        |
| 445451 | M | Sidamo Re, A Level or I  | 1 | 90  | N | Pass        |
| 445474 | M | South Regi A Level or I  | 0 | 60  | N | Withdrawn   |
| 445595 | M | Addis Abak A Level or I  | 0 | 120 | N | Withdrawn   |
| 445782 | M | South Regi HE Qualific   | 0 | 60  | N | Withdrawn   |
| 446097 | F | South Wes A Level or I   | 0 | 120 | N | Pass        |
| 446730 | F | Oromia Re A Level or I   | 0 | 60  | N | Pass        |
| 446761 | M | Afar Regioi A Level or I | 0 | 120 | N | Pass        |
| 447393 | F | Afar Regioi HE Qualific  | 2 | 370 | N | Withdrawn   |
| 447510 | F | Somalia Re A Level or I  | 0 | 120 | N | Pass        |
| 447644 | F | South Wes A Level or I   | 0 | 90  | Y | Pass        |
| 464748 | F | North Regi HE Qualific   | 1 | 60  | N | Pass        |
| 464968 | M | South Wes Lower Than     | 0 | 60  | N | Pass        |

|        |   |                         |   |     |   |             |
|--------|---|-------------------------|---|-----|---|-------------|
| 465564 | M | South Wes Lower Tha     | 0 | 60  | N | Pass        |
| 465629 | F | Tigrai Regi Lower Tha   | 1 | 60  | N | Pass        |
| 466230 | F | South Regi A Level or I | 0 | 60  | N | Pass        |
| 466289 | M | South Wes Lower Tha     | 0 | 90  | N | Pass        |
| 466714 | M | South Wes A Level or I  | 3 | 60  | Y | Withdrawn   |
| 466956 | M | Sidamo Re Lower Tha     | 0 | 210 | N | Withdrawn   |
| 467893 | F | Sidamo Re A Level or I  | 0 | 60  | N | Pass        |
| 468386 | F | Afar Regio HE Qualific  | 3 | 150 | N | Fail        |
| 468720 | M | Somalia Re Lower Tha    | 0 | 60  | N | Pass        |
| 468845 | F | Somalia Re Lower Tha    | 0 | 60  | N | Pass        |
| 469624 | M | South Wes A Level or I  | 0 | 60  | N | Fail        |
| 469633 | M | South Regi A Level or I | 0 | 60  | N | Pass        |
| 470555 | M | South Wes Lower Tha     | 1 | 90  | Y | Fail        |
| 470914 | F | Addis Abak Lower Tha    | 0 | 150 | N | Pass        |
| 471781 | F | Afar Regio A Level or I | 2 | 60  | N | Withdrawn   |
| 471976 | M | South Regi HE Qualific  | 0 | 60  | N | Fail        |
| 472073 | M | South Regi Lower Tha    | 0 | 60  | N | Pass        |
| 472616 | M | Addis Abak Lower Tha    | 0 | 150 | N | Distinction |
| 472649 | F | Addis Abak A Level or I | 0 | 150 | N | Withdrawn   |
| 472949 | F | Sidamo Re HE Qualific   | 2 | 60  | N | Fail        |
| 473129 | F | Sidamo Re A Level or I  | 1 | 120 | N | Pass        |
| 474119 | M | Addis Abak A Level or I | 0 | 60  | N | Withdrawn   |
| 474246 | M | Oromia Re Lower Tha     | 2 | 60  | N | Fail        |
| 475443 | M | South Regi Lower Tha    | 1 | 60  | N | Withdrawn   |
| 475839 | M | Oromia Re Lower Tha     | 0 | 120 | Y | Fail        |
| 475863 | M | North Regi Lower Tha    | 0 | 60  | N | Pass        |
| 475908 | F | South Regi Lower Tha    | 0 | 60  | N | Fail        |
| 477099 | M | Sidamo Re A Level or I  | 0 | 180 | N | Withdrawn   |
| 477354 | M | Sidamo Re Lower Tha     | 0 | 60  | N | Pass        |
| 477556 | F | Oromia Re A Level or I  | 2 | 60  | N | Fail        |
| 478326 | M | Addis Abak Lower Tha    | 0 | 240 | Y | Withdrawn   |
| 478517 | M | South Wes A Level or I  | 1 | 120 | N | Fail        |
| 479553 | M | Sidamo Re HE Qualific   | 0 | 60  | N | Pass        |
| 482173 | F | Afar Regio A Level or I | 1 | 60  | N | Pass        |
| 483136 | F | Sidamo Re Lower Tha     | 0 | 60  | N | Pass        |
| 483149 | F | Oromia Re A Level or I  | 0 | 60  | N | Pass        |
| 483200 | F | Afar Regio A Level or I | 0 | 60  | N | Pass        |
| 483343 | F | South Wes Lower Tha     | 0 | 240 | N | Withdrawn   |
| 484130 | F | Sidamo Re A Level or I  | 1 | 180 | N | Withdrawn   |
| 484171 | M | South Regi A Level or I | 1 | 120 | N | Withdrawn   |
| 485282 | F | South Regi A Level or I | 0 | 60  | N | Pass        |
| 485421 | M | Somalia Re Lower Tha    | 0 | 120 | N | Pass        |
| 485612 | F | South Regi A Level or I | 0 | 180 | N | Withdrawn   |
| 486244 | F | South Regi A Level or I | 1 | 60  | Y | Withdrawn   |
| 486287 | M | Oromia Re Lower Tha     | 0 | 60  | Y | Pass        |
| 486539 | F | Amhara Re Lower Tha     | 1 | 60  | N | Withdrawn   |
| 487556 | M | Somalia Re HE Qualific  | 1 | 60  | N | Pass        |

|        |   |                         |   |     |   |             |
|--------|---|-------------------------|---|-----|---|-------------|
| 487607 | M | South Regi A Level or I | 0 | 60  | N | Fail        |
| 488575 | M | Afar Regio Lower Tha    | 1 | 60  | N | Withdrawn   |
| 488941 | M | North Regi Post Gradu   | 0 | 120 | N | Distinction |
| 490629 | M | South Wes A Level or I  | 0 | 60  | N | Pass        |
| 491688 | M | Oromia Re Lower Tha     | 2 | 90  | Y | Withdrawn   |
| 492254 | M | Sidamo Re Lower Tha     | 0 | 120 | N | Withdrawn   |
| 492480 | M | Oromia Re Lower Tha     | 0 | 60  | N | Pass        |
| 492496 | M | Sidamo Re Lower Tha     | 0 | 60  | N | Distinction |
| 493207 | F | South Regi Lower Tha    | 1 | 60  | N | Fail        |
| 493434 | M | South Wes Lower Tha     | 1 | 60  | N | Fail        |
| 493650 | F | Afar Regio A Level or I | 0 | 60  | N | Withdrawn   |
| 493826 | M | Amhara Re A Level or I  | 0 | 120 | Y | Withdrawn   |
| 493876 | M | Sidamo Re A Level or I  | 1 | 60  | N | Fail        |
| 495493 | M | North Regi Lower Tha    | 0 | 60  | Y | Pass        |
| 495615 | M | South Wes Lower Tha     | 0 | 60  | N | Pass        |
| 495762 | M | Tigrai Regi HE Qualific | 2 | 60  | N | Withdrawn   |
| 495881 | M | Oromia Re Lower Tha     | 0 | 60  | N | Pass        |
| 495903 | M | South Regi Lower Tha    | 0 | 60  | N | Withdrawn   |
| 496154 | F | South Regi A Level or I | 1 | 60  | N | Withdrawn   |
| 496494 | M | Afar Regio Lower Tha    | 0 | 60  | N | Fail        |
| 496916 | M | South Regi Lower Tha    | 0 | 60  | N | Pass        |
| 497989 | F | Amhara Re A Level or I  | 0 | 120 | Y | Withdrawn   |
| 498326 | M | Amhara Re A Level or I  | 0 | 60  | N | Withdrawn   |
| 499865 | F | Afar Regio HE Qualific  | 1 | 90  | N | Withdrawn   |
| 500339 | M | Amhara Re Lower Tha     | 1 | 120 | N | Withdrawn   |
| 500707 | F | Addis Abak A Level or I | 2 | 60  | Y | Fail        |
| 502470 | M | South Regi Lower Tha    | 0 | 60  | N | Pass        |
| 502557 | M | South Wes HE Qualific   | 1 | 60  | N | Withdrawn   |
| 504034 | F | South Wes A Level or I  | 1 | 120 | N | Withdrawn   |
| 504064 | F | Addis Abak A Level or I | 2 | 60  | Y | Fail        |
| 504251 | F | Afar Regio A Level or I | 0 | 60  | N | Pass        |
| 504552 | M | Addis Abak Lower Tha    | 1 | 60  | N | Fail        |
| 504589 | F | South Regi A Level or I | 0 | 60  | N | Pass        |
| 504749 | M | South Regi A Level or I | 0 | 60  | N | Withdrawn   |
| 504841 | M | South Regi A Level or I | 0 | 120 | N | Withdrawn   |
| 506824 | M | South Regi Lower Tha    | 1 | 60  | N | Fail        |
| 507478 | M | South Regi Lower Tha    | 2 | 60  | N | Fail        |
| 507576 | M | Addis Abak HE Qualific  | 0 | 60  | N | Withdrawn   |
| 508615 | M | Sidamo Re HE Qualific   | 2 | 60  | N | Fail        |
| 508829 | M | Sidamo Re A Level or I  | 0 | 60  | N | Withdrawn   |
| 508859 | F | North Regi A Level or I | 0 | 60  | N | Pass        |
| 508872 | M | Amhara Re Lower Tha     | 1 | 60  | N | Fail        |
| 509933 | F | North Regi Lower Tha    | 0 | 60  | N | Fail        |
| 509998 | F | Somalia Re A Level or I | 0 | 120 | N | Withdrawn   |
| 510424 | F | Addis Abak A Level or I | 0 | 60  | N | Pass        |
| 510456 | F | Afar Regio A Level or I | 0 | 60  | N | Distinction |
| 510532 | F | South Regi Lower Tha    | 1 | 90  | N | Withdrawn   |

|        |   |                          |   |     |   |             |
|--------|---|--------------------------|---|-----|---|-------------|
| 511345 | M | Somalia Re A Level or I  | 0 | 60  | N | Pass        |
| 511676 | M | Afar Region HE Qualific  | 0 | 60  | N | Fail        |
| 512046 | F | Sidamo Re Lower Than     | 0 | 60  | N | Pass        |
| 513283 | F | North Regi Lower Than    | 1 | 60  | N | Withdrawn   |
| 513356 | M | North Regi Lower Than    | 2 | 120 | N | Withdrawn   |
| 514277 | F | Afar Region HE Qualific  | 1 | 60  | N | Distinction |
| 514324 | M | Sidamo Re Lower Than     | 1 | 120 | N | Fail        |
| 515052 | M | North Regi A Level or I  | 0 | 60  | N | Fail        |
| 515645 | M | South Wes A Level or I   | 0 | 90  | N | Fail        |
| 516405 | M | South Regi A Level or I  | 0 | 60  | N | Withdrawn   |
| 516562 | F | Somalia Re A Level or I  | 0 | 75  | Y | Fail        |
| 518244 | M | South Regi HE Qualific   | 0 | 60  | N | Pass        |
| 519116 | F | South Regi A Level or I  | 0 | 120 | N | Withdrawn   |
| 519941 | M | Tigrai Regi A Level or I | 0 | 60  | N | Withdrawn   |
| 520349 | M | South Regi Lower Than    | 2 | 60  | N | Pass        |
| 523762 | M | Sidamo Re A Level or I   | 0 | 120 | N | Pass        |
| 523817 | M | South Regi A Level or I  | 0 | 90  | N | Withdrawn   |
| 524020 | M | Somalia Re Lower Than    | 1 | 60  | N | Withdrawn   |
| 524427 | F | South Wes Lower Than     | 0 | 120 | N | Pass        |
| 525068 | M | South Regi Lower Than    | 0 | 60  | Y | Distinction |
| 525870 | M | South Regi Lower Than    | 0 | 60  | N | Pass        |
| 526352 | F | Tigrai Regi A Level or I | 2 | 90  | N | Pass        |
| 526699 | F | South Regi Lower Than    | 2 | 90  | Y | Withdrawn   |
| 526912 | F | Sidamo Re HE Qualific    | 0 | 60  | N | Withdrawn   |
| 528175 | F | South Regi Lower Than    | 0 | 120 | Y | Withdrawn   |
| 528363 | M | Oromia Re HE Qualific    | 0 | 60  | N | Withdrawn   |
| 528535 | M | South Regi Lower Than    | 1 | 90  | N | Withdrawn   |
| 529789 | M | Addis Abak Lower Than    | 1 | 60  | N | Withdrawn   |
| 529885 | F | Sidamo Re A Level or I   | 0 | 150 | N | Withdrawn   |
| 530807 | M | South Regi A Level or I  | 0 | 120 | N | Withdrawn   |
| 531646 | M | South Regi Lower Than    | 0 | 60  | N | Fail        |
| 532236 | M | Amhara Re A Level or I   | 0 | 60  | N | Pass        |
| 534827 | F | Oromia Re A Level or I   | 0 | 60  | Y | Withdrawn   |
| 535220 | M | Addis Abak Lower Than    | 1 | 60  | N | Fail        |
| 535351 | M | Amhara Re Lower Than     | 1 | 60  | N | Fail        |
| 536296 | F | South Regi A Level or I  | 0 | 60  | N | Pass        |
| 536736 | M | Sidamo Re HE Qualific    | 0 | 120 | N | Withdrawn   |
| 537463 | F | Tigrai Regi Lower Than   | 0 | 150 | Y | Withdrawn   |
| 537577 | M | Sidamo Re Lower Than     | 0 | 60  | Y | Pass        |
| 540821 | M | Sidamo Re A Level or I   | 0 | 60  | N | Fail        |
| 540885 | M | South Regi Lower Than    | 0 | 240 | N | Withdrawn   |
| 543478 | F | Afar Region A Level or I | 0 | 120 | N | Fail        |
| 543976 | F | Somalia Re Lower Than    | 1 | 120 | N | Withdrawn   |
| 544612 | M | Addis Abak Lower Than    | 0 | 180 | N | Withdrawn   |
| 544649 | M | North Regi Lower Than    | 2 | 60  | N | Withdrawn   |
| 545127 | F | Sidamo Re Lower Than     | 0 | 120 | N | Withdrawn   |
| 545752 | F | Oromia Re A Level or I   | 0 | 60  | N | Fail        |

|        |   |                          |   |     |   |             |
|--------|---|--------------------------|---|-----|---|-------------|
| 546299 | M | South Regi Lower Tha     | 1 | 60  | N | Fail        |
| 546773 | M | North Regi Lower Tha     | 0 | 60  | N | Fail        |
| 547464 | F | South Wes HE Qualific    | 0 | 120 | N | Withdrawn   |
| 547786 | M | Afar Regio HE Qualific   | 1 | 120 | N | Fail        |
| 548486 | M | North Regi A Level or I  | 1 | 60  | N | Withdrawn   |
| 548851 | M | Sidamo Re Lower Tha      | 1 | 60  | N | Withdrawn   |
| 549337 | M | South Wes A Level or I   | 1 | 60  | N | Fail        |
| 549626 | F | South Regi Lower Tha     | 0 | 60  | N | Withdrawn   |
| 550142 | F | Oromia Re A Level or I   | 2 | 60  | N | Fail        |
| 550358 | F | Sidamo Re Lower Tha      | 0 | 60  | N | Fail        |
| 550380 | M | Afar Regio Lower Tha     | 1 | 60  | N | Fail        |
| 551332 | F | Amhara Re Lower Tha      | 0 | 120 | N | Withdrawn   |
| 551440 | M | Tigrai Regi A Level or I | 0 | 60  | N | Fail        |
| 551595 | M | Amhara Re Lower Tha      | 0 | 220 | N | Withdrawn   |
| 552114 | F | South Wes Lower Tha      | 1 | 120 | N | Fail        |
| 552965 | M | Somalia Re Lower Tha     | 0 | 120 | N | Pass        |
| 553367 | M | South Regi A Level or I  | 0 | 60  | N | Pass        |
| 553576 | F | South Regi A Level or I  | 0 | 150 | N | Withdrawn   |
| 554215 | M | South Regi Lower Tha     | 0 | 120 | Y | Withdrawn   |
| 554407 | F | Oromia Re A Level or I   | 0 | 120 | N | Withdrawn   |
| 554746 | M | Oromia Re A Level or I   | 0 | 60  | N | Fail        |
| 554863 | M | South Wes HE Qualific    | 0 | 60  | N | Pass        |
| 554885 | M | Sidamo Re A Level or I   | 1 | 90  | N | Withdrawn   |
| 555132 | M | South Regi A Level or I  | 1 | 90  | N | Withdrawn   |
| 555989 | M | Addis Abak A Level or I  | 0 | 90  | N | Pass        |
| 556007 | F | Addis Abak A Level or I  | 1 | 90  | N | Fail        |
| 556374 | M | Tigrai Regi Lower Tha    | 1 | 60  | N | Fail        |
| 556514 | F | Sidamo Re Lower Tha      | 0 | 60  | N | Pass        |
| 557083 | F | Amhara Re Lower Tha      | 1 | 120 | Y | Withdrawn   |
| 557237 | M | Afar Regio A Level or I  | 1 | 120 | Y | Pass        |
| 557389 | F | Afar Regio HE Qualific   | 0 | 60  | N | Pass        |
| 557474 | M | Sidamo Re A Level or I   | 1 | 60  | N | Withdrawn   |
| 559447 | F | South Wes Lower Tha      | 0 | 60  | N | Pass        |
| 559707 | M | Oromia Re A Level or I   | 0 | 60  | N | Fail        |
| 559852 | F | South Regi Lower Tha     | 0 | 60  | N | Pass        |
| 559882 | M | South Regi Lower Tha     | 0 | 120 | N | Withdrawn   |
| 560301 | M | South Wes A Level or I   | 0 | 60  | N | Pass        |
| 561848 | M | Sidamo Re A Level or I   | 1 | 120 | N | Fail        |
| 561904 | F | Amhara Re Lower Tha      | 0 | 60  | N | Pass        |
| 562100 | M | Amhara Re A Level or I   | 1 | 60  | Y | Withdrawn   |
| 562619 | F | Afar Regio Lower Tha     | 0 | 210 | Y | Withdrawn   |
| 562827 | F | Oromia Re Lower Tha      | 0 | 60  | Y | Withdrawn   |
| 562890 | F | South Regi A Level or I  | 0 | 120 | N | Withdrawn   |
| 563453 | M | Somalia Re Lower Tha     | 0 | 60  | N | Pass        |
| 563595 | F | South Regi A Level or I  | 0 | 60  | N | Fail        |
| 563710 | M | South Regi Lower Tha     | 0 | 60  | N | Withdrawn   |
| 563845 | M | Addis Abak HE Qualific   | 0 | 60  | N | Distinction |



|        |   |                          |   |     |   |             |
|--------|---|--------------------------|---|-----|---|-------------|
| 563847 | F | South Wes Lower Tha      | 1 | 60  | N | Fail        |
| 564000 | F | Tigrai Regi A Level or I | 1 | 60  | N | Withdrawn   |
| 564643 | F | North Regi Lower Tha     | 1 | 120 | N | Withdrawn   |
| 565006 | F | Amhara Re A Level or I   | 0 | 60  | N | Fail        |
| 565209 | M | Tigrai Regi HE Qualific  | 0 | 90  | N | Pass        |
| 565446 | F | South Regi A Level or I  | 0 | 60  | N | Pass        |
| 566134 | M | Amhara Re Lower Tha      | 1 | 60  | N | Withdrawn   |
| 566300 | M | Tigrai Regi Lower Tha    | 0 | 60  | N | Pass        |
| 566482 | F | Sidamo Re A Level or I   | 1 | 120 | N | Withdrawn   |
| 566553 | F | Afar Regi HE Qualific    | 1 | 60  | N | Fail        |
| 566560 | M | Afar Regi HE Qualific    | 0 | 205 | N | Withdrawn   |
| 566712 | F | Sidamo Re Lower Tha      | 0 | 120 | N | Withdrawn   |
| 567176 | F | North Regi A Level or I  | 1 | 60  | N | Fail        |
| 567281 | M | South Wes A Level or I   | 0 | 90  | Y | Withdrawn   |
| 567285 | M | South Wes A Level or I   | 1 | 60  | N | Pass        |
| 567597 | F | Addis Abak A Level or I  | 0 | 90  | Y | Withdrawn   |
| 568103 | M | Afar Regi A Level or I   | 0 | 60  | N | Pass        |
| 568297 | M | Oromia Re Lower Tha      | 0 | 60  | N | Fail        |
| 568415 | F | Amhara Re A Level or I   | 0 | 120 | N | Withdrawn   |
| 568446 | M | Amhara Re HE Qualific    | 0 | 60  | N | Distinction |
| 569633 | F | Amhara Re A Level or I   | 0 | 90  | N | Pass        |
| 569737 | M | South Wes A Level or I   | 0 | 60  | N | Pass        |
| 569749 | F | South Regi Lower Tha     | 0 | 90  | N | Withdrawn   |
| 569840 | F | South Regi HE Qualific   | 1 | 60  | N | Pass        |
| 570119 | F | Sidamo Re A Level or I   | 0 | 90  | N | Pass        |
| 570411 | F | South Wes A Level or I   | 0 | 60  | N | Pass        |
| 570863 | F | Addis Abak A Level or I  | 0 | 60  | N | Pass        |
| 571292 | F | Tigrai Regi Lower Tha    | 1 | 60  | N | Fail        |
| 571382 | M | Amhara Re A Level or I   | 1 | 60  | N | Withdrawn   |
| 571644 | F | South Regi A Level or I  | 0 | 60  | N | Pass        |
| 572043 | M | North Regi A Level or I  | 1 | 60  | N | Withdrawn   |
| 572156 | M | Amhara Re A Level or I   | 1 | 60  | Y | Pass        |
| 572281 | M | Somalia Re A Level or I  | 1 | 60  | Y | Pass        |
| 572413 | M | South Regi Lower Tha     | 0 | 120 | N | Withdrawn   |
| 572414 | F | South Wes Lower Tha      | 2 | 60  | N | Withdrawn   |
| 572430 | F | Amhara Re A Level or I   | 0 | 150 | N | Pass        |
| 572434 | M | North Regi A Level or I  | 0 | 60  | N | Pass        |
| 572722 | F | South Regi A Level or I  | 0 | 60  | N | Withdrawn   |
| 572880 | F | South Regi A Level or I  | 1 | 60  | Y | Fail        |
| 573328 | F | Sidamo Re Lower Tha      | 0 | 60  | N | Fail        |
| 573646 | M | Amhara Re A Level or I   | 1 | 60  | N | Fail        |
| 573742 | M | Addis Abak Lower Tha     | 0 | 60  | N | Pass        |
| 573969 | F | Amhara Re Lower Tha      | 0 | 60  | N | Pass        |
| 574347 | F | Tigrai Regi A Level or I | 0 | 60  | N | Pass        |
| 574431 | F | Tigrai Regi Lower Tha    | 0 | 120 | N | Fail        |
| 574612 | M | Addis Abak A Level or I  | 0 | 60  | N | Fail        |
| 574843 | M | Amhara Re Lower Tha      | 0 | 60  | N | Withdrawn   |

|        |   |                          |   |     |   |           |
|--------|---|--------------------------|---|-----|---|-----------|
| 574866 | M | North Regi Lower Tha     | 1 | 60  | N | Withdrawn |
| 574928 | F | Sidamo Re A Level or I   | 0 | 120 | N | Pass      |
| 575009 | F | South Regi A Level or I  | 0 | 60  | N | Pass      |
| 575200 | F | Amhara Re A Level or I   | 0 | 120 | N | Withdrawn |
| 575272 | F | Amhara Re A Level or I   | 0 | 70  | Y | Withdrawn |
| 575337 | F | Afar Regio HE Qualific   | 1 | 120 | N | Withdrawn |
| 575380 | F | Amhara Re Lower Tha      | 0 | 60  | N | Pass      |
| 575398 | M | Amhara Re Lower Tha      | 0 | 90  | N | Fail      |
| 575566 | M | Somalia Re A Level or I  | 0 | 60  | N | Fail      |
| 575855 | M | Sidamo Re HE Qualific    | 1 | 60  | N | Pass      |
| 575999 | F | Somalia Re A Level or I  | 1 | 60  | N | Fail      |
| 576306 | F | Addis Abak Lower Tha     | 1 | 60  | N | Pass      |
| 576515 | M | Addis Abak HE Qualific   | 0 | 60  | N | Pass      |
| 576885 | F | Addis Abak Lower Tha     | 0 | 120 | N | Pass      |
| 577196 | F | Afar Regio A Level or I  | 1 | 60  | Y | Pass      |
| 577359 | M | Somalia Re Lower Tha     | 0 | 120 | N | Withdrawn |
| 577520 | M | South Regi Lower Tha     | 0 | 60  | N | Pass      |
| 577526 | M | South Regi A Level or I  | 1 | 60  | N | Pass      |
| 577566 | M | North Regi HE Qualific   | 0 | 90  | N | Pass      |
| 577638 | F | South Regi A Level or I  | 1 | 90  | Y | Pass      |
| 577652 | F | Sidamo Re Lower Tha      | 1 | 120 | N | Pass      |
| 577751 | F | Afar Regio A Level or I  | 0 | 60  | N | Pass      |
| 577934 | M | Oromia Re HE Qualific    | 0 | 120 | N | Withdrawn |
| 577937 | M | South Wes Lower Tha      | 0 | 60  | N | Pass      |
| 577977 | F | South Regi Lower Tha     | 2 | 120 | N | Withdrawn |
| 578395 | F | Afar Regio A Level or I  | 0 | 60  | N | Pass      |
| 578427 | F | South Regi Lower Tha     | 1 | 60  | N | Fail      |
| 578616 | F | Addis Abak Lower Tha     | 0 | 60  | N | Pass      |
| 578646 | M | South Regi A Level or I  | 0 | 60  | N | Pass      |
| 578857 | M | South Wes A Level or I   | 0 | 60  | N | Pass      |
| 579017 | M | Addis Abak Lower Tha     | 0 | 60  | N | Pass      |
| 579172 | F | South Wes Lower Tha      | 0 | 60  | N | Fail      |
| 579386 | F | Somalia Re A Level or I  | 0 | 60  | N | Pass      |
| 580450 | M | Addis Abak Post Gradu    | 1 | 60  | N | Fail      |
| 580458 | F | Sidamo Re A Level or I   | 0 | 60  | N | Pass      |
| 580534 | M | Amhara Re A Level or I   | 1 | 60  | N | Fail      |
| 580838 | M | Addis Abak A Level or I  | 0 | 60  | N | Withdrawn |
| 582009 | F | Oromia Re A Level or I   | 0 | 60  | N | Pass      |
| 582197 | M | Tigrai Regio HE Qualific | 0 | 60  | N | Pass      |
| 582608 | M | South Regi Lower Tha     | 0 | 120 | N | Pass      |
| 583092 | M | Sidamo Re HE Qualific    | 0 | 60  | N | Withdrawn |
| 583147 | M | Tigrai Regio Lower Tha   | 1 | 120 | N | Withdrawn |
| 583276 | F | South Regi A Level or I  | 0 | 60  | N | Withdrawn |
| 583604 | F | Sidamo Re Lower Tha      | 0 | 60  | N | Withdrawn |
| 584038 | M | Sidamo Re Lower Tha      | 0 | 120 | N | Withdrawn |
| 584077 | M | Amhara Re A Level or I   | 2 | 90  | N | Withdrawn |
| 584591 | F | South Wes A Level or I   | 1 | 150 | Y | Withdrawn |

|        |   |                           |   |     |   |             |
|--------|---|---------------------------|---|-----|---|-------------|
| 584981 | M | Afar Region A Level or    | 1 | 90  | N | Pass        |
| 585153 | M | South Wes Lower Tha       | 0 | 120 | N | Pass        |
| 585354 | F | Addis Abat A Level or     | 0 | 60  | N | Pass        |
| 585432 | M | Tigray Region HE Qualific | 0 | 60  | N | Pass        |
| 585526 | M | Amhara Re Lower Tha       | 0 | 150 | N | Pass        |
| 585626 | F | Oromia Re A Level or      | 0 | 60  | N | Pass        |
| 585773 | F | South Wes A Level or      | 0 | 60  | N | Pass        |
| 585832 | F | North Regi A Level or     | 0 | 60  | Y | Pass        |
| 585998 | F | Tigray Region Lower Tha   | 1 | 60  | N | Fail        |
| 586121 | M | Afar Region A Level or    | 0 | 60  | N | Pass        |
| 586315 | M | Somalia Re Lower Tha      | 0 | 60  | N | Pass        |
| 586444 | F | Tigray Region A Level or  | 0 | 60  | N | Withdrawn   |
| 586729 | F | South Regi A Level or     | 0 | 120 | N | Pass        |
| 586946 | F | South Regi A Level or     | 1 | 60  | N | Pass        |
| 586957 | M | Tigray Region A Level or  | 0 | 120 | Y | Withdrawn   |
| 587140 | F | Afar Region HE Qualific   | 0 | 60  | N | Pass        |
| 587375 | M | Addis Abat A Level or     | 0 | 60  | N | Pass        |
| 587446 | F | South Regi A Level or     | 1 | 90  | N | Pass        |
| 587576 | M | North Regi A Level or     | 2 | 120 | N | Pass        |
| 587579 | M | North Regi A Level or     | 0 | 60  | N | Pass        |
| 587772 | F | Oromia Re A Level or      | 1 | 90  | N | Withdrawn   |
| 587777 | M | Tigray Region Lower Tha   | 0 | 60  | N | Fail        |
| 588058 | M | South Regi Lower Tha      | 0 | 180 | Y | Withdrawn   |
| 588179 | M | Oromia Re Lower Tha       | 0 | 120 | N | Pass        |
| 588203 | M | Sidamo Re HE Qualific     | 0 | 120 | N | Pass        |
| 588240 | M | South Regi A Level or     | 0 | 60  | N | Pass        |
| 588383 | M | Tigray Region Lower Tha   | 0 | 180 | N | Withdrawn   |
| 588954 | M | Tigray Region A Level or  | 1 | 120 | N | Withdrawn   |
| 589279 | M | Oromia Re A Level or      | 0 | 60  | N | Pass        |
| 589585 | F | Somalia Re Lower Tha      | 0 | 60  | N | Pass        |
| 590110 | F | Somalia Re A Level or     | 0 | 120 | N | Withdrawn   |
| 590127 | F | South Regi A Level or     | 0 | 60  | N | Pass        |
| 590227 | F | Addis Abat HE Qualific    | 0 | 60  | N | Withdrawn   |
| 590340 | F | North Regi Lower Tha      | 0 | 70  | N | Distinction |
| 590562 | F | South Wes A Level or      | 0 | 60  | N | Pass        |
| 590616 | M | South Wes A Level or      | 0 | 60  | N | Fail        |
| 590632 | F | Tigray Region A Level or  | 0 | 60  | N | Withdrawn   |
| 590753 | M | Amhara Re A Level or      | 0 | 60  | N | Fail        |
| 590886 | M | Amhara Re HE Qualific     | 1 | 90  | N | Pass        |
| 590920 | F | Somalia Re Lower Tha      | 1 | 60  | N | Pass        |
| 591540 | M | Amhara Re A Level or      | 0 | 60  | N | Pass        |
| 591852 | F | Afar Region A Level or    | 2 | 60  | Y | Withdrawn   |
| 592214 | F | South Regi A Level or     | 0 | 60  | N | Pass        |
| 592221 | M | Addis Abat A Level or     | 0 | 90  | N | Pass        |
| 592344 | F | Addis Abat A Level or     | 0 | 180 | N | Withdrawn   |
| 592661 | M | Afar Region A Level or    | 0 | 60  | N | Pass        |
| 592899 | M | South Regi Lower Tha      | 0 | 60  | N | Fail        |

|        |   |                          |   |     |   |             |
|--------|---|--------------------------|---|-----|---|-------------|
| 593099 | M | North Regi Lower Tha     | 1 | 60  | N | Distinction |
| 593373 | M | North Regi A Level or I  | 0 | 60  | N | Pass        |
| 593556 | M | Afar Regio HE Qualific   | 0 | 60  | N | Fail        |
| 593903 | M | South Regi A Level or I  | 1 | 210 | N | Pass        |
| 593976 | F | Sidamo Re Lower Tha      | 0 | 60  | N | Pass        |
| 594033 | F | Addis Abak A Level or I  | 0 | 60  | N | Pass        |
| 594048 | M | Oromia Re Lower Tha      | 0 | 60  | N | Pass        |
| 594071 | F | Afar Regio A Level or I  | 0 | 60  | N | Pass        |
| 594161 | M | South Regi Lower Tha     | 0 | 60  | N | Pass        |
| 594164 | F | Amhara Re HE Qualific    | 1 | 270 | Y | Withdrawn   |
| 594329 | M | Tigrai Regi Lower Tha    | 0 | 60  | N | Fail        |
| 594950 | M | Amhara Re HE Qualific    | 0 | 60  | N | Distinction |
| 595215 | M | Tigrai Regi A Level or I | 0 | 60  | N | Pass        |
| 595310 | M | Afar Regio HE Qualific   | 0 | 180 | N | Pass        |
| 595396 | F | South Regi A Level or I  | 1 | 60  | N | Withdrawn   |
| 595741 | M | South Regi Lower Tha     | 0 | 60  | N | Fail        |
| 595787 | M | Tigrai Regi HE Qualific  | 0 | 60  | N | Withdrawn   |
| 595876 | M | Sidamo Re A Level or I   | 0 | 60  | N | Pass        |
| 595883 | F | South Regi A Level or I  | 0 | 60  | N | Fail        |
| 596322 | F | Afar Regio HE Qualific   | 0 | 60  | N | Pass        |
| 596359 | M | Addis Abak HE Qualific   | 0 | 60  | N | Pass        |
| 596420 | M | North Regi A Level or I  | 0 | 60  | N | Withdrawn   |
| 596620 | F | Somalia Re Lower Tha     | 2 | 120 | Y | Withdrawn   |
| 596759 | F | Afar Regio Lower Tha     | 0 | 60  | N | Pass        |
| 597529 | M | Sidamo Re Lower Tha      | 0 | 60  | N | Pass        |
| 597608 | M | Oromia Re A Level or I   | 0 | 60  | N | Pass        |
| 597779 | F | Afar Regio A Level or I  | 0 | 60  | N | Withdrawn   |
| 597786 | M | Sidamo Re Lower Tha      | 0 | 60  | N | Pass        |
| 597814 | M | South Wes A Level or I   | 0 | 270 | N | Withdrawn   |
| 598103 | M | Somalia Re A Level or I  | 0 | 60  | N | Pass        |
| 598123 | M | South Regi A Level or I  | 1 | 240 | Y | Withdrawn   |
| 598141 | M | Afar Regio HE Qualific   | 0 | 120 | N | Pass        |
| 598283 | F | Afar Regio HE Qualific   | 0 | 120 | N | Withdrawn   |
| 598303 | M | Sidamo Re A Level or I   | 0 | 60  | N | Fail        |
| 598493 | M | Addis Abak Lower Tha     | 0 | 60  | Y | Withdrawn   |
| 598536 | F | Somalia Re A Level or I  | 1 | 60  | N | Fail        |
| 599083 | F | South Regi A Level or I  | 0 | 60  | N | Pass        |
| 599270 | M | South Regi Lower Tha     | 0 | 60  | N | Withdrawn   |
| 599651 | M | Oromia Re Lower Tha      | 0 | 60  | N | Fail        |
| 599742 | F | South Wes A Level or I   | 1 | 60  | N | Withdrawn   |
| 599837 | F | Afar Regio A Level or I  | 2 | 60  | Y | Fail        |
| 599877 | M | Sidamo Re A Level or I   | 0 | 120 | N | Withdrawn   |
| 600033 | M | South Regi Lower Tha     | 0 | 60  | N | Pass        |
| 600502 | M | Sidamo Re Lower Tha      | 0 | 150 | N | Fail        |
| 600554 | M | Addis Abak A Level or I  | 0 | 60  | Y | Withdrawn   |
| 600616 | M | Oromia Re A Level or I   | 0 | 120 | N | Withdrawn   |
| 600680 | M | Somalia Re Lower Tha     | 0 | 60  | N | Pass        |

|        |   |                         |   |     |   |             |
|--------|---|-------------------------|---|-----|---|-------------|
| 601418 | M | North Regi HE Qualific  | 0 | 60  | N | Pass        |
| 601488 | M | Amhara Re Lower Thar    | 1 | 60  | N | Pass        |
| 602029 | F | Somalia Re Lower Thar   | 0 | 60  | N | Pass        |
| 602185 | M | Afar Regio HE Qualific  | 0 | 90  | N | Pass        |
| 602318 | M | North Regi Lower Thar   | 0 | 60  | N | Distinction |
| 602528 | M | Addis Abak HE Qualific  | 0 | 60  | N | Pass        |
| 603224 | F | South Regi A Level or I | 0 | 60  | N | Pass        |
| 603303 | M | North Regi A Level or I | 0 | 120 | N | Distinction |
| 603406 | M | Amhara Re Lower Thar    | 0 | 60  | N | Pass        |
| 603490 | F | Somalia Re A Level or I | 0 | 120 | N | Withdrawn   |
| 603493 | F | Addis Abak No Formal    | 0 | 60  | N | Withdrawn   |
| 603726 | M | South Wes A Level or I  | 0 | 60  | N | Withdrawn   |
| 603961 | M | South Regi Lower Thar   | 0 | 60  | N | Pass        |
| 604500 | M | South Regi Lower Thar   | 0 | 60  | N | Pass        |
| 604632 | M | South Wes A Level or I  | 0 | 180 | N | Withdrawn   |
| 604671 | M | Amhara Re Lower Thar    | 0 | 60  | N | Fail        |
| 604709 | M | Amhara Re Lower Thar    | 0 | 60  | N | Pass        |
| 605070 | M | North Regi A Level or I | 1 | 120 | N | Fail        |
| 605118 | F | Amhara Re Lower Thar    | 1 | 130 | N | Pass        |
| 605313 | M | North Regi A Level or I | 1 | 90  | N | Withdrawn   |
| 605488 | F | Afar Regio A Level or I | 0 | 120 | N | Pass        |
| 605676 | M | Oromia Re A Level or I  | 0 | 120 | N | Withdrawn   |
| 605759 | M | Somalia Re A Level or I | 1 | 90  | N | Pass        |
| 605859 | M | Addis Abak Lower Thar   | 1 | 60  | N | Fail        |
| 605876 | M | Amhara Re A Level or I  | 0 | 60  | N | Pass        |
| 606089 | M | North Regi A Level or I | 0 | 120 | N | Withdrawn   |
| 606247 | M | North Regi A Level or I | 0 | 60  | N | Withdrawn   |
| 606757 | M | Afar Regio HE Qualific  | 0 | 60  | N | Pass        |
| 606837 | M | South Wes Lower Thar    | 0 | 60  | N | Fail        |
| 607110 | M | South Regi A Level or I | 1 | 60  | N | Fail        |
| 607483 | M | Oromia Re Lower Thar    | 0 | 60  | N | Pass        |
| 607525 | M | Oromia Re Lower Thar    | 0 | 60  | N | Fail        |
| 607638 | M | Amhara Re A Level or I  | 1 | 60  | N | Pass        |
| 607767 | M | South Regi A Level or I | 0 | 120 | N | Pass        |
| 607975 | M | South Wes A Level or I  | 0 | 60  | N | Pass        |
| 608746 | F | South Regi Lower Thar   | 1 | 120 | N | Pass        |
| 608775 | F | Somalia Re A Level or I | 0 | 120 | Y | Pass        |
| 608842 | M | South Wes A Level or I  | 0 | 60  | N | Pass        |
| 608943 | F | South Wes Lower Thar    | 1 | 60  | Y | Withdrawn   |
| 609242 | M | Amhara Re Lower Thar    | 1 | 120 | N | Withdrawn   |
| 609245 | M | Afar Regio HE Qualific  | 0 | 60  | N | Pass        |
| 609556 | M | South Regi A Level or I | 0 | 60  | N | Pass        |
| 609655 | M | South Wes Lower Thar    | 0 | 60  | N | Fail        |
| 609681 | M | Oromia Re A Level or I  | 2 | 150 | N | Withdrawn   |
| 610197 | M | Amhara Re Lower Thar    | 0 | 60  | N | Pass        |
| 610537 | M | Amhara Re A Level or I  | 1 | 120 | N | Fail        |
| 610609 | F | South Regi Lower Thar   | 1 | 60  | N | Withdrawn   |

|        |   |                         |   |     |   |             |
|--------|---|-------------------------|---|-----|---|-------------|
| 610622 | F | Somalia Re Lower Than   | 0 | 210 | N | Withdrawn   |
| 610828 | M | Addis Abak A Level or   | 0 | 90  | N | Fail        |
| 611013 | M | South Regi Lower Than   | 0 | 60  | N | Pass        |
| 611159 | M | Addis Abak A Level or   | 0 | 60  | N | Pass        |
| 611235 | F | South Regi Lower Than   | 0 | 60  | N | Withdrawn   |
| 611356 | F | South Regi A Level or   | 2 | 90  | N | Withdrawn   |
| 611588 | M | Addis Abak A Level or   | 0 | 120 | N | Withdrawn   |
| 611790 | F | South Regi A Level or   | 0 | 60  | Y | Pass        |
| 611800 | M | Somalia Re Lower Than   | 1 | 60  | N | Pass        |
| 611865 | M | Sidamo Re A Level or    | 1 | 60  | N | Fail        |
| 611982 | M | Tigrai Regi A Level or  | 0 | 120 | N | Pass        |
| 612443 | F | South Wes A Level or    | 1 | 60  | N | Fail        |
| 612615 | M | North Regi Lower Than   | 0 | 60  | N | Withdrawn   |
| 612717 | M | North Regi HE Qualific  | 0 | 180 | N | Pass        |
| 612979 | M | Oromia Re Lower Than    | 0 | 60  | N | Withdrawn   |
| 613910 | M | South Regi Lower Than   | 1 | 70  | N | Fail        |
| 614471 | F | Oromia Re Lower Than    | 1 | 120 | N | Withdrawn   |
| 614499 | F | Addis Abak Lower Than   | 0 | 60  | N | Withdrawn   |
| 614683 | F | Afar Regi HE Qualific   | 0 | 180 | N | Withdrawn   |
| 614791 | F | South Regi A Level or   | 0 | 60  | N | Pass        |
| 614912 | F | South Regi A Level or   | 0 | 60  | N | Withdrawn   |
| 614930 | M | Sidamo Re A Level or    | 1 | 60  | N | Withdrawn   |
| 615183 | F | Tigrai Regi HE Qualific | 0 | 60  | N | Withdrawn   |
| 616862 | F | Amhara Re A Level or    | 1 | 60  | Y | Withdrawn   |
| 617249 | F | South Wes A Level or    | 0 | 120 | N | Withdrawn   |
| 617850 | M | South Regi A Level or   | 1 | 120 | N | Pass        |
| 617952 | F | South Regi A Level or   | 0 | 60  | N | Fail        |
| 617993 | F | Amhara Re A Level or    | 0 | 60  | N | Withdrawn   |
| 618033 | F | Oromia Re A Level or    | 0 | 60  | Y | Withdrawn   |
| 618531 | F | South Regi A Level or   | 0 | 120 | Y | Withdrawn   |
| 618737 | M | Oromia Re A Level or    | 0 | 60  | N | Distinction |
| 618825 | F | Amhara Re Lower Than    | 0 | 120 | Y | Withdrawn   |
| 618989 | F | South Regi Lower Than   | 0 | 90  | N | Pass        |
| 619055 | M | Oromia Re HE Qualific   | 0 | 120 | N | Fail        |
| 619851 | F | North Regi A Level or   | 1 | 120 | N | Withdrawn   |
| 619907 | F | Addis Abak A Level or   | 0 | 60  | N | Pass        |
| 619910 | F | South Regi HE Qualific  | 0 | 60  | N | Pass        |
| 620676 | F | Afar Regi Lower Than    | 1 | 120 | N | Withdrawn   |
| 621001 | M | Sidamo Re A Level or    | 0 | 120 | N | Fail        |
| 621659 | F | Oromia Re Lower Than    | 1 | 90  | N | Fail        |
| 622246 | M | South Regi A Level or   | 0 | 90  | N | Withdrawn   |
| 622384 | M | Afar Regi A Level or    | 1 | 90  | Y | Fail        |
| 622555 | M | Sidamo Re Lower Than    | 0 | 60  | N | Distinction |
| 622597 | F | South Wes A Level or    | 0 | 60  | N | Withdrawn   |
| 622626 | F | Oromia Re A Level or    | 1 | 60  | N | Pass        |
| 623190 | M | South Wes A Level or    | 0 | 150 | N | Pass        |
| 623223 | M | South Regi Lower Than   | 0 | 60  | N | Withdrawn   |

|        |   |                         |   |     |   |           |
|--------|---|-------------------------|---|-----|---|-----------|
| 623224 | M | South Regi A Level or I | 0 | 60  | N | Withdrawn |
| 623225 | F | South Wes A Level or I  | 0 | 60  | N | Pass      |
| 623276 | F | Sidamo Re Lower Tha     | 0 | 60  | N | Pass      |
| 623289 | F | Sidamo Re A Level or I  | 0 | 60  | N | Pass      |
| 623407 | F | Addis Abak No Formal    | 0 | 120 | N | Withdrawn |
| 623586 | M | Addis Abak Lower Tha    | 0 | 120 | N | Withdrawn |
| 623641 | F | Sidamo Re A Level or I  | 0 | 60  | N | Pass      |
| 623864 | F | Sidamo Re A Level or I  | 0 | 60  | N | Pass      |
| 623937 | M | Sidamo Re Lower Tha     | 0 | 60  | N | Pass      |
| 623968 | M | Sidamo Re Lower Tha     | 0 | 60  | N | Pass      |
| 624631 | M | Addis Abak Lower Tha    | 0 | 120 | N | Withdrawn |
| 624891 | M | Amhara Re Lower Tha     | 0 | 60  | N | Pass      |
| 625012 | M | Somalia Re A Level or I | 1 | 120 | N | Withdrawn |
| 625013 | M | South Regi Lower Tha    | 0 | 60  | N | Withdrawn |
| 625283 | M | South Regi A Level or I | 0 | 60  | N | Pass      |
| 625467 | M | North Regi Lower Tha    | 0 | 60  | N | Pass      |
| 625502 | M | Afar Regio HE Qualific  | 0 | 120 | N | Withdrawn |
| 625555 | M | Amhara Re A Level or I  | 0 | 60  | N | Pass      |
| 625765 | F | Addis Abak A Level or I | 0 | 60  | N | Fail      |
| 626132 | M | South Regi Lower Tha    | 0 | 60  | N | Pass      |
| 626151 | M | Amhara Re Lower Tha     | 1 | 60  | N | Withdrawn |
| 626179 | M | Afar Regio HE Qualific  | 0 | 60  | Y | Pass      |
| 626386 | F | Somalia Re Lower Tha    | 0 | 330 | Y | Withdrawn |
| 626546 | M | North Regi A Level or I | 1 | 60  | N | Withdrawn |
| 626552 | F | Somalia Re A Level or I | 0 | 300 | N | Withdrawn |
| 626630 | M | South Regi A Level or I | 0 | 120 | N | Pass      |
| 626799 | M | Afar Regio Lower Tha    | 0 | 120 | N | Withdrawn |
| 627097 | F | Amhara Re A Level or I  | 0 | 120 | N | Pass      |
| 627236 | F | Sidamo Re A Level or I  | 0 | 60  | N | Pass      |
| 627295 | M | Amhara Re Lower Tha     | 0 | 120 | Y | Pass      |
| 627367 | F | Somalia Re A Level or I | 1 | 60  | N | Withdrawn |
| 627416 | F | South Wes A Level or I  | 1 | 120 | N | Withdrawn |
| 627453 | M | South Regi Lower Tha    | 0 | 60  | N | Pass      |
| 627476 | F | Afar Regio HE Qualific  | 0 | 190 | N | Pass      |
| 627618 | F | Addis Abak A Level or I | 0 | 60  | N | Withdrawn |
| 627695 | M | Sidamo Re Lower Tha     | 0 | 60  | N | Fail      |
| 628259 | F | South Wes A Level or I  | 0 | 120 | N | Fail      |
| 628390 | F | Addis Abak HE Qualific  | 0 | 60  | N | Pass      |
| 628437 | M | South Regi A Level or I | 1 | 60  | N | Pass      |
| 628519 | M | South Regi A Level or I | 0 | 60  | N | Pass      |
| 628593 | F | Sidamo Re A Level or I  | 0 | 60  | Y | Pass      |
| 628631 | F | North Regi A Level or I | 0 | 60  | N | Pass      |
| 628662 | M | Afar Regio Lower Tha    | 1 | 120 | N | Withdrawn |
| 628685 | M | Amhara Re Lower Tha     | 0 | 60  | N | Withdrawn |
| 628733 | F | Amhara Re A Level or I  | 1 | 120 | N | Withdrawn |
| 629309 | M | South Regi A Level or I | 0 | 60  | Y | Pass      |
| 629379 | F | South Regi A Level or I | 0 | 60  | N | Pass      |

|        |   |                          |   |     |   |             |
|--------|---|--------------------------|---|-----|---|-------------|
| 629703 | M | Oromia Re HE Qualific    | 0 | 90  | N | Pass        |
| 629878 | M | South Regi Lower Tha     | 0 | 60  | N | Fail        |
| 630328 | F | South Regi A Level or I  | 0 | 60  | N | Pass        |
| 630354 | M | South Regi A Level or I  | 0 | 60  | N | Withdrawn   |
| 630380 | M | South Wes A Level or I   | 0 | 60  | Y | Pass        |
| 630775 | M | Addis Abak Lower Tha     | 0 | 60  | N | Withdrawn   |
| 630858 | M | Sidamo Re A Level or I   | 0 | 60  | N | Pass        |
| 630900 | M | Addis Abak A Level or I  | 0 | 60  | N | Pass        |
| 631055 | M | South Regi A Level or I  | 0 | 60  | N | Pass        |
| 631240 | M | South Regi A Level or I  | 1 | 60  | N | Fail        |
| 631293 | F | Addis Abak Lower Tha     | 0 | 60  | N | Withdrawn   |
| 631295 | F | Oromia Re Lower Tha      | 1 | 120 | Y | Withdrawn   |
| 631336 | F | South Regi HE Qualific   | 0 | 60  | N | Withdrawn   |
| 631486 | M | South Regi Lower Tha     | 0 | 120 | N | Withdrawn   |
| 631513 | M | Somalia Re A Level or I  | 1 | 60  | N | Withdrawn   |
| 631603 | F | South Wes Lower Tha      | 0 | 90  | N | Pass        |
| 631835 | M | Sidamo Re Lower Tha      | 0 | 120 | N | Pass        |
| 631960 | M | Sidamo Re A Level or I   | 0 | 150 | N | Withdrawn   |
| 631998 | F | North Regi Lower Tha     | 0 | 60  | N | Pass        |
| 632093 | F | Afar Regio A Level or I  | 1 | 60  | N | Pass        |
| 632314 | F | Addis Abak A Level or I  | 1 | 120 | Y | Fail        |
| 632473 | F | Afar Regio A Level or I  | 1 | 120 | N | Withdrawn   |
| 632645 | F | Oromia Re A Level or I   | 0 | 60  | N | Pass        |
| 632719 | M | Sidamo Re A Level or I   | 0 | 60  | N | Withdrawn   |
| 632795 | F | Amhara Re A Level or I   | 0 | 210 | N | Withdrawn   |
| 632831 | M | Afar Regio HE Qualific   | 0 | 60  | N | Fail        |
| 632877 | M | Sidamo Re HE Qualific    | 0 | 60  | N | Distinction |
| 633237 | F | Amhara Re A Level or I   | 0 | 120 | N | Withdrawn   |
| 633295 | M | North Regi Lower Tha     | 0 | 60  | N | Fail        |
| 633331 | F | South Regi A Level or I  | 1 | 60  | N | Pass        |
| 633409 | M | South Regi HE Qualific   | 0 | 60  | N | Fail        |
| 633414 | M | Afar Regio Lower Tha     | 0 | 120 | Y | Fail        |
| 633475 | M | Sidamo Re A Level or I   | 0 | 60  | Y | Fail        |
| 633525 | M | South Regi Lower Tha     | 0 | 60  | N | Withdrawn   |
| 633574 | F | Afar Regio A Level or I  | 0 | 120 | Y | Pass        |
| 633618 | M | South Regi A Level or I  | 1 | 90  | N | Pass        |
| 634035 | M | Afar Regio HE Qualific   | 0 | 120 | N | Withdrawn   |
| 634037 | M | Tigrai Regi A Level or I | 0 | 60  | N | Pass        |
| 634047 | M | South Wes A Level or I   | 0 | 60  | N | Pass        |
| 634305 | F | Tigrai Regi Lower Tha    | 0 | 120 | N | Pass        |
| 634489 | F | South Wes A Level or I   | 0 | 90  | N | Withdrawn   |
| 634508 | M | Sidamo Re A Level or I   | 1 | 60  | N | Fail        |
| 634646 | M | Afar Regio A Level or I  | 0 | 60  | N | Distinction |
| 634693 | M | Somalia Re A Level or I  | 0 | 120 | Y | Withdrawn   |
| 634966 | F | South Regi A Level or I  | 0 | 60  | N | Fail        |
| 635071 | F | Sidamo Re No Formal      | 0 | 120 | N | Withdrawn   |
| 635170 | F | North Regi A Level or I  | 0 | 120 | N | Fail        |



|        |   |                         |   |     |   |             |
|--------|---|-------------------------|---|-----|---|-------------|
| 635255 | M | Somalia Re A Level or I | 0 | 60  | Y | Distinction |
| 635418 | M | Addis Abak A Level or I | 0 | 60  | N | Fail        |
| 635986 | F | Sidamo Re HE Qualific   | 0 | 120 | N | Withdrawn   |
| 635992 | F | Sidamo Re A Level or I  | 0 | 120 | N | Distinction |
| 636243 | F | Amhara Re A Level or I  | 0 | 120 | N | Withdrawn   |
| 636364 | M | South Regi Lower Tha    | 0 | 90  | N | Pass        |
| 636420 | M | Somalia Re Lower Tha    | 0 | 120 | N | Withdrawn   |
| 636451 | F | Amhara Re A Level or I  | 0 | 120 | N | Pass        |
| 636484 | M | Amhara Re A Level or I  | 0 | 60  | N | Pass        |
| 636503 | F | Somalia Re A Level or I | 0 | 120 | N | Fail        |
| 636590 | F | South Regi A Level or I | 0 | 150 | N | Withdrawn   |
| 636594 | M | South Regi A Level or I | 0 | 70  | N | Distinction |
| 636697 | M | Afar Regio HE Qualific  | 0 | 60  | N | Pass        |
| 636712 | F | Addis Abak A Level or I | 0 | 120 | Y | Withdrawn   |
| 636875 | F | Addis Abak A Level or I | 0 | 120 | N | Pass        |
| 637064 | M | Sidamo Re A Level or I  | 0 | 60  | N | Fail        |
| 637075 | M | South Wes A Level or I  | 0 | 60  | N | Withdrawn   |
| 637347 | F | South Wes Lower Tha     | 0 | 60  | N | Fail        |
| 637374 | M | South Regi A Level or I | 0 | 120 | N | Fail        |
| 637473 | M | South Regi A Level or I | 0 | 60  | N | Pass        |
| 637691 | M | Somalia Re A Level or I | 0 | 90  | N | Pass        |
| 638023 | M | South Regi A Level or I | 0 | 120 | N | Withdrawn   |
| 638051 | M | Oromia Re Lower Tha     | 0 | 60  | N | Fail        |
| 638131 | M | Amhara Re A Level or I  | 0 | 90  | N | Fail        |
| 638202 | M | Addis Abak Lower Tha    | 0 | 120 | N | Fail        |
| 638243 | M | South Regi A Level or I | 0 | 120 | Y | Withdrawn   |
| 638358 | M | Oromia Re Lower Tha     | 0 | 90  | N | Withdrawn   |
| 638384 | F | Tigrai Regio Lower Tha  | 0 | 60  | Y | Pass        |
| 638657 | M | South Regi Lower Tha    | 0 | 120 | N | Withdrawn   |
| 639190 | M | Sidamo Re A Level or I  | 0 | 120 | N | Withdrawn   |
| 639514 | F | North Regi HE Qualific  | 0 | 120 | N | Pass        |
| 639766 | F | Amhara Re A Level or I  | 0 | 60  | N | Pass        |
| 640054 | M | Amhara Re Lower Tha     | 0 | 120 | N | Withdrawn   |
| 640144 | F | Amhara Re Lower Tha     | 0 | 120 | N | Fail        |
| 640178 | F | Somalia Re A Level or I | 0 | 60  | N | Fail        |
| 640691 | M | Addis Abak HE Qualific  | 0 | 120 | N | Withdrawn   |
| 640773 | M | South Wes Lower Tha     | 0 | 150 | Y | Fail        |
| 640836 | F | South Regi Lower Tha    | 0 | 120 | N | Pass        |
| 640942 | M | Somalia Re A Level or I | 0 | 60  | N | Distinction |
| 640975 | M | South Regi A Level or I | 0 | 60  | N | Pass        |
| 640982 | M | Afar Regio A Level or I | 0 | 60  | N | Pass        |
| 641192 | M | South Wes Lower Tha     | 0 | 60  | N | Withdrawn   |
| 641253 | F | Addis Abak Lower Tha    | 0 | 120 | N | Pass        |
| 641305 | M | North Regi Lower Tha    | 0 | 120 | N | Withdrawn   |
| 641315 | F | Sidamo Re A Level or I  | 0 | 90  | N | Pass        |
| 641557 | F | Addis Abak No Formal    | 0 | 210 | Y | Withdrawn   |
| 641609 | M | Amhara Re Lower Tha     | 0 | 60  | N | Fail        |

|        |   |                          |   |     |   |             |
|--------|---|--------------------------|---|-----|---|-------------|
| 641613 | M | South Wes Lower Tha      | 0 | 60  | N | Withdrawn   |
| 641744 | F | Oromia Re Lower Tha      | 0 | 60  | Y | Distinction |
| 641845 | M | Somalia Re A Level or I  | 0 | 60  | N | Withdrawn   |
| 641896 | F | Afar Regio A Level or I  | 0 | 60  | N | Pass        |
| 642139 | M | Sidamo Re Lower Tha      | 0 | 60  | N | Pass        |
| 642222 | F | North Regi Lower Tha     | 0 | 120 | N | Withdrawn   |
| 642230 | F | Afar Regio HE Qualific   | 0 | 90  | N | Withdrawn   |
| 642310 | M | Somalia Re HE Qualific   | 0 | 60  | N | Pass        |
| 642443 | M | Oromia Re A Level or I   | 0 | 60  | N | Distinction |
| 642474 | F | South Regi A Level or I  | 0 | 60  | N | Distinction |
| 642501 | M | Oromia Re A Level or I   | 0 | 90  | N | Distinction |
| 642625 | M | Addis Abak A Level or I  | 0 | 120 | Y | Fail        |
| 642744 | M | Somalia Re A Level or I  | 0 | 150 | N | Withdrawn   |
| 642764 | M | Tigrai Regi Lower Tha    | 0 | 90  | Y | Withdrawn   |
| 642785 | F | Addis Abak A Level or I  | 0 | 120 | N | Withdrawn   |
| 642838 | F | Sidamo Re A Level or I   | 0 | 90  | N | Pass        |
| 643006 | M | Addis Abak A Level or I  | 0 | 120 | Y | Pass        |
| 643021 | F | South Regi Lower Tha     | 0 | 120 | N | Withdrawn   |
| 643036 | F | Afar Regio Lower Tha     | 0 | 60  | N | Pass        |
| 643126 | F | Addis Abak A Level or I  | 0 | 60  | N | Pass        |
| 643199 | M | Somalia Re HE Qualific   | 0 | 120 | N | Fail        |
| 643230 | F | Tigrai Regi A Level or I | 0 | 120 | N | Withdrawn   |
| 643280 | M | South Wes A Level or I   | 0 | 60  | N | Pass        |
| 643285 | M | Afar Regio A Level or I  | 0 | 60  | N | Distinction |
| 643542 | F | Oromia Re A Level or I   | 0 | 180 | N | Withdrawn   |
| 643729 | M | Sidamo Re A Level or I   | 0 | 60  | N | Pass        |
| 643758 | M | South Wes A Level or I   | 0 | 120 | N | Pass        |
| 644159 | M | Somalia Re HE Qualific   | 0 | 60  | N | Withdrawn   |
| 644229 | M | Oromia Re A Level or I   | 0 | 120 | N | Fail        |
| 644310 | M | South Wes A Level or I   | 0 | 60  | N | Withdrawn   |
| 644409 | M | Sidamo Re Lower Tha      | 0 | 120 | N | Pass        |
| 644457 | F | Sidamo Re A Level or I   | 0 | 120 | N | Pass        |
| 644474 | M | Sidamo Re Lower Tha      | 0 | 120 | N | Pass        |
| 644516 | M | North Regi Lower Tha     | 0 | 120 | N | Withdrawn   |
| 644525 | F | South Regi A Level or I  | 0 | 60  | N | Pass        |
| 644567 | M | Oromia Re Lower Tha      | 0 | 60  | N | Withdrawn   |
| 644881 | M | South Wes A Level or I   | 0 | 120 | N | Withdrawn   |
| 644956 | M | Amhara Re A Level or I   | 0 | 240 | N | Pass        |
| 644964 | F | South Wes A Level or I   | 0 | 120 | Y | Distinction |
| 645019 | F | Addis Abak Lower Tha     | 0 | 60  | N | Withdrawn   |
| 645031 | M | Tigrai Regi A Level or I | 0 | 60  | N | Pass        |
| 645054 | F | Afar Regio Lower Tha     | 0 | 120 | N | Fail        |
| 645081 | M | Addis Abak Lower Tha     | 0 | 60  | N | Pass        |
| 645147 | M | Tigrai Regi Lower Tha    | 0 | 60  | N | Fail        |
| 645219 | M | South Regi Lower Tha     | 0 | 120 | N | Pass        |
| 645322 | F | Addis Abak A Level or I  | 0 | 120 | N | Withdrawn   |
| 645353 | M | Amhara Re Lower Tha      | 0 | 240 | N | Withdrawn   |

|        |   |                          |   |     |   |             |
|--------|---|--------------------------|---|-----|---|-------------|
| 645425 | M | South Wes A Level or l   | 0 | 120 | N | Pass        |
| 645434 | F | Amhara Re A Level or l   | 0 | 60  | N | Pass        |
| 645499 | M | Afar Regio HE Qualific   | 0 | 60  | N | Pass        |
| 645512 | F | South Regi Lower Than    | 0 | 330 | N | Withdrawn   |
| 645551 | M | Oromia Re Lower Than     | 0 | 60  | N | Pass        |
| 645710 | M | South Regi HE Qualific   | 0 | 120 | N | Withdrawn   |
| 645738 | F | South Regi A Level or l  | 0 | 120 | N | Withdrawn   |
| 645792 | M | South Wes Lower Than     | 0 | 110 | N | Distinction |
| 645818 | M | South Regi A Level or l  | 0 | 60  | N | Pass        |
| 645850 | M | Amhara Re A Level or l   | 0 | 120 | N | Withdrawn   |
| 645864 | M | Afar Regio A Level or l  | 0 | 120 | N | Pass        |
| 645866 | M | Somalia Re Lower Than    | 0 | 60  | N | Withdrawn   |
| 645906 | M | Sidamo Re Lower Than     | 0 | 240 | Y | Withdrawn   |
| 645939 | M | South Regi A Level or l  | 0 | 120 | N | Pass        |
| 645962 | M | Afar Regio A Level or l  | 0 | 60  | N | Withdrawn   |
| 646006 | F | Sidamo Re A Level or l   | 0 | 90  | Y | Withdrawn   |
| 646020 | M | South Regi Lower Than    | 0 | 180 | N | Withdrawn   |
| 646027 | F | South Regi A Level or l  | 0 | 60  | N | Withdrawn   |
| 646077 | M | South Wes A Level or l   | 0 | 120 | Y | Withdrawn   |
| 646086 | M | Amhara Re Lower Than     | 0 | 180 | N | Withdrawn   |
| 646090 | F | Oromia Re HE Qualific    | 0 | 60  | N | Distinction |
| 646314 | F | Tigrai Regi A Level or l | 0 | 90  | N | Withdrawn   |
| 646322 | M | Afar Regio HE Qualific   | 0 | 60  | N | Pass        |
| 646344 | F | Addis Abak A Level or l  | 0 | 120 | N | Pass        |
| 646359 | M | Oromia Re A Level or l   | 0 | 150 | N | Pass        |
| 646391 | M | South Regi Lower Than    | 0 | 60  | N | Withdrawn   |
| 646489 | F | Amhara Re A Level or l   | 0 | 120 | N | Pass        |
| 646589 | M | South Wes A Level or l   | 0 | 120 | Y | Fail        |
| 646689 | M | Addis Abak A Level or l  | 0 | 120 | N | Withdrawn   |
| 646700 | F | South Wes A Level or l   | 0 | 120 | N | Withdrawn   |
| 646755 | M | Sidamo Re Lower Than     | 0 | 90  | N | Withdrawn   |
| 646836 | M | South Wes A Level or l   | 0 | 120 | N | Fail        |
| 646952 | F | Addis Abak A Level or l  | 0 | 120 | Y | Fail        |
| 646957 | M | South Regi A Level or l  | 0 | 90  | N | Pass        |
| 647166 | M | Sidamo Re HE Qualific    | 0 | 60  | N | Pass        |
| 647215 | F | Oromia Re A Level or l   | 0 | 90  | N | Pass        |
| 647218 | M | Amhara Re Lower Than     | 0 | 60  | N | Fail        |
| 647227 | F | South Wes Lower Than     | 0 | 60  | N | Fail        |
| 647305 | M | South Wes A Level or l   | 0 | 60  | N | Fail        |
| 647318 | M | Tigrai Regi A Level or l | 0 | 90  | N | Fail        |
| 647368 | F | Tigrai Regi HE Qualific  | 0 | 180 | N | Withdrawn   |
| 647373 | F | Somalia Re A Level or l  | 0 | 60  | N | Pass        |
| 647464 | M | South Wes A Level or l   | 0 | 120 | N | Pass        |
| 647468 | M | Sidamo Re Lower Than     | 0 | 150 | Y | Withdrawn   |
| 647488 | F | Somalia Re A Level or l  | 0 | 60  | N | Fail        |
| 647565 | M | Afar Regio Lower Than    | 0 | 120 | Y | Withdrawn   |
| 647604 | F | Addis Abak No Formal     | 0 | 240 | Y | Fail        |

|        |   |                          |   |     |   |             |
|--------|---|--------------------------|---|-----|---|-------------|
| 647605 | M | South Regi A Level or I  | 0 | 60  | N | Pass        |
| 647612 | F | North Regi Lower Tha     | 0 | 120 | N | Fail        |
| 647614 | M | Amhara Re HE Qualific    | 0 | 120 | N | Withdrawn   |
| 647647 | F | Amhara Re A Level or I   | 0 | 120 | N | Pass        |
| 647824 | M | South Regi A Level or I  | 0 | 120 | N | Withdrawn   |
| 647879 | F | Afar Regioi A Level or I | 0 | 90  | Y | Pass        |
| 647920 | M | Oromia Re HE Qualific    | 0 | 60  | N | Withdrawn   |
| 647937 | M | South Regi A Level or I  | 0 | 120 | Y | Pass        |
| 647947 | M | South Wes Lower Tha      | 0 | 210 | Y | Withdrawn   |
| 647953 | M | South Regi A Level or I  | 0 | 120 | N | Withdrawn   |
| 647968 | M | Amhara Re Lower Tha      | 0 | 120 | N | Withdrawn   |
| 648172 | F | Afar Regioi HE Qualific  | 0 | 60  | Y | Pass        |
| 648183 | F | Sidamo Re HE Qualific    | 0 | 60  | N | Pass        |
| 648237 | M | Addis Abat A Level or I  | 0 | 60  | N | Fail        |
| 648269 | F | South Wes A Level or I   | 0 | 60  | N | Pass        |
| 648321 | F | Somalia Re A Level or I  | 0 | 90  | N | Distinction |
| 648419 | F | Amhara Re A Level or I   | 0 | 120 | N | Withdrawn   |
| 648428 | M | Somalia Re A Level or I  | 0 | 60  | N | Pass        |
| 648570 | F | Addis Abat Lower Tha     | 0 | 90  | N | Pass        |
| 648597 | F | Afar Regioi A Level or I | 0 | 60  | Y | Fail        |
| 648695 | F | South Regi Lower Tha     | 0 | 150 | N | Fail        |
| 648766 | F | Afar Regioi HE Qualific  | 0 | 60  | N | Withdrawn   |
| 648833 | M | Amhara Re Lower Tha      | 0 | 210 | N | Withdrawn   |
| 648841 | M | Addis Abat A Level or I  | 0 | 90  | N | Pass        |
| 648854 | M | Amhara Re Lower Tha      | 0 | 120 | N | Pass        |
| 648880 | M | South Regi A Level or I  | 0 | 120 | N | Fail        |
| 648888 | M | South Regi A Level or I  | 0 | 60  | N | Withdrawn   |
| 648898 | F | South Wes HE Qualific    | 0 | 120 | N | Pass        |
| 648920 | F | Afar Regioi A Level or I | 0 | 60  | N | Pass        |
| 648947 | F | Sidamo Re Lower Tha      | 0 | 180 | N | Withdrawn   |
| 648959 | M | Oromia Re Lower Tha      | 0 | 240 | N | Fail        |
| 648966 | F | Afar Regioi A Level or I | 0 | 60  | N | Withdrawn   |
| 649014 | F | South Regi A Level or I  | 0 | 60  | N | Pass        |
| 649041 | M | South Wes Lower Tha      | 0 | 120 | Y | Fail        |
| 649078 | M | Sidamo Re Lower Tha      | 0 | 120 | N | Pass        |
| 649090 | M | South Wes A Level or I   | 0 | 120 | Y | Pass        |
| 649120 | M | Oromia Re Lower Tha      | 0 | 60  | N | Fail        |
| 649214 | M | Afar Regioi A Level or I | 0 | 60  | Y | Pass        |
| 649230 | F | Afar Regioi Lower Tha    | 0 | 180 | N | Withdrawn   |
| 649261 | F | Afar Regioi HE Qualific  | 0 | 90  | N | Withdrawn   |
| 649321 | M | Sidamo Re A Level or I   | 0 | 120 | N | Pass        |
| 649383 | M | Afar Regioi HE Qualific  | 0 | 60  | N | Fail        |
| 649394 | M | South Regi A Level or I  | 0 | 120 | N | Withdrawn   |
| 649413 | M | Sidamo Re A Level or I   | 0 | 120 | N | Fail        |
| 649514 | F | Afar Regioi A Level or I | 0 | 60  | N | Pass        |
| 649552 | F | Afar Regioi A Level or I | 0 | 90  | N | Fail        |
| 649614 | M | South Wes A Level or I   | 0 | 120 | N | Distinction |

|        |   |                          |   |     |   |             |
|--------|---|--------------------------|---|-----|---|-------------|
| 649688 | M | Sidamo Re HE Qualific    | 0 | 120 | N | Pass        |
| 649689 | M | Sidamo Re Lower Than     | 0 | 60  | N | Withdrawn   |
| 649745 | M | Addis Abab HE Qualific   | 0 | 60  | N | Distinction |
| 649761 | M | Sidamo Re A Level or I   | 0 | 120 | N | Withdrawn   |
| 649780 | M | South Wes A Level or I   | 0 | 90  | Y | Pass        |
| 649819 | M | North Regi Lower Than    | 0 | 120 | N | Pass        |
| 649880 | M | Somalia Re A Level or I  | 0 | 60  | N | Distinction |
| 649949 | M | Sidamo Re A Level or I   | 0 | 60  | N | Pass        |
| 649963 | M | Sidamo Re A Level or I   | 0 | 210 | Y | Withdrawn   |
| 650010 | M | Sidamo Re A Level or I   | 0 | 60  | Y | Distinction |
| 650074 | M | Tigrai Regi A Level or I | 0 | 120 | N | Withdrawn   |
| 650091 | F | Somalia Re A Level or I  | 0 | 90  | N | Pass        |
| 650232 | M | Sidamo Re A Level or I   | 0 | 60  | N | Fail        |
| 650243 | F | South Regi A Level or I  | 0 | 180 | N | Withdrawn   |
| 650271 | M | North Regi HE Qualific   | 0 | 120 | N | Fail        |
| 650279 | F | South Regi A Level or I  | 0 | 120 | N | Pass        |
| 650376 | M | South Wes HE Qualific    | 0 | 60  | N | Pass        |
| 650414 | M | Oromia Re A Level or I   | 0 | 120 | N | Withdrawn   |
| 650420 | M | Afar Regi Lower Than     | 0 | 120 | N | Pass        |
| 650434 | M | Tigrai Regi A Level or I | 0 | 60  | N | Distinction |
| 650442 | M | Tigrai Regi HE Qualific  | 0 | 60  | N | Pass        |
| 650478 | M | Oromia Re A Level or I   | 0 | 60  | N | Pass        |
| 650515 | F | Afar Regi A Level or I   | 0 | 120 | Y | Withdrawn   |
| 650642 | M | South Regi A Level or I  | 0 | 70  | N | Pass        |
| 650684 | M | South Regi A Level or I  | 0 | 90  | N | Distinction |
| 650711 | M | South Wes Lower Than     | 0 | 60  | N | Fail        |
| 650829 | M | Somalia Re Lower Than    | 0 | 90  | N | Withdrawn   |
| 650850 | F | South Wes A Level or I   | 0 | 180 | N | Fail        |
| 650946 | M | South Wes Lower Than     | 0 | 60  | N | Pass        |
| 650947 | M | Sidamo Re HE Qualific    | 0 | 120 | N | Pass        |
| 650957 | M | Sidamo Re A Level or I   | 0 | 60  | N | Pass        |
| 650993 | M | Afar Regi Lower Than     | 0 | 60  | Y | Pass        |
| 651048 | M | North Regi A Level or I  | 0 | 60  | Y | Fail        |
| 651058 | M | Sidamo Re A Level or I   | 0 | 90  | N | Fail        |
| 651061 | M | South Wes Lower Than     | 0 | 120 | Y | Fail        |
| 651120 | F | North Regi Post Gradu    | 0 | 90  | N | Pass        |
| 651174 | M | South Regi A Level or I  | 0 | 120 | N | Withdrawn   |
| 651176 | M | Amhara Re Lower Than     | 0 | 60  | N | Fail        |
| 651267 | M | South Wes A Level or I   | 0 | 120 | N | Fail        |
| 651481 | M | South Wes Lower Than     | 0 | 180 | N | Withdrawn   |
| 651493 | F | South Regi Lower Than    | 0 | 120 | N | Pass        |
| 651495 | M | North Regi HE Qualific   | 0 | 120 | N | Distinction |
| 651507 | M | South Regi Lower Than    | 0 | 90  | N | Fail        |
| 651508 | F | Sidamo Re A Level or I   | 0 | 120 | N | Distinction |
| 651561 | M | Somalia Re A Level or I  | 0 | 60  | N | Pass        |
| 651579 | M | South Regi Lower Than    | 0 | 60  | N | Pass        |
| 651619 | M | South Regi HE Qualific   | 0 | 60  | N | Distinction |

|        |   |                         |   |     |   |             |
|--------|---|-------------------------|---|-----|---|-------------|
| 651627 | M | Sidamo Re A Level or I  | 0 | 90  | N | Pass        |
| 651651 | M | Oromia Re Lower Than    | 0 | 120 | N | Withdrawn   |
| 651672 | M | Tigray Regi Lower Than  | 0 | 180 | N | Fail        |
| 651728 | M | Afar Regi A Level or I  | 0 | 60  | Y | Withdrawn   |
| 651759 | M | Sidamo Re HE Qualific   | 0 | 120 | N | Distinction |
| 651804 | F | Oromia Re A Level or I  | 0 | 120 | N | Pass        |
| 651942 | M | South Wes A Level or I  | 0 | 60  | N | Pass        |
| 651963 | M | Oromia Re Lower Than    | 0 | 120 | N | Withdrawn   |
| 652048 | M | Afar Regi Lower Than    | 0 | 60  | N | Fail        |
| 652103 | M | South Wes HE Qualific   | 0 | 60  | N | Pass        |
| 652267 | F | Somalia Re Lower Than   | 0 | 60  | N | Fail        |
| 652292 | F | Tigray Regi Lower Than  | 0 | 120 | Y | Withdrawn   |
| 652293 | M | South Regi A Level or I | 0 | 60  | N | Pass        |
| 652318 | M | Afar Regi A Level or I  | 0 | 60  | N | Distinction |
| 652406 | M | Oromia Re A Level or I  | 0 | 120 | N | Withdrawn   |
| 652428 | M | Tigray Regi Lower Than  | 0 | 120 | N | Fail        |
| 652531 | F | Afar Regi A Level or I  | 0 | 150 | Y | Withdrawn   |
| 652617 | F | Amhara Re A Level or I  | 0 | 60  | N | Pass        |
| 652619 | F | Sidamo Re Lower Than    | 0 | 60  | N | Fail        |
| 652680 | M | Amhara Re HE Qualific   | 0 | 60  | N | Distinction |
| 652732 | M | South Regi Lower Than   | 0 | 60  | N | Pass        |
| 652881 | M | South Wes Lower Than    | 0 | 60  | N | Fail        |
| 652965 | M | Sidamo Re HE Qualific   | 0 | 60  | N | Distinction |
| 653031 | M | North Regi Lower Than   | 0 | 60  | N | Withdrawn   |
| 653051 | F | South Regi Lower Than   | 0 | 180 | Y | Fail        |
| 653060 | F | Sidamo Re HE Qualific   | 0 | 240 | N | Withdrawn   |
| 653171 | M | South Regi A Level or I | 0 | 60  | N | Fail        |
| 653296 | F | Addis Abak Lower Than   | 0 | 120 | N | Withdrawn   |
| 653319 | M | North Regi Lower Than   | 0 | 60  | N | Pass        |
| 653354 | M | South Regi Lower Than   | 0 | 60  | N | Fail        |
| 653412 | M | Addis Abak A Level or I | 0 | 90  | N | Fail        |
| 653452 | F | South Wes A Level or I  | 0 | 120 | N | Pass        |
| 653550 | M | South Regi HE Qualific  | 0 | 60  | N | Distinction |
| 653569 | F | Addis Abak A Level or I | 0 | 90  | N | Pass        |
| 653711 | M | Somalia Re Lower Than   | 0 | 60  | N | Pass        |
| 653723 | F | Somalia Re A Level or I | 0 | 120 | Y | Withdrawn   |
| 653729 | F | Afar Regi A Level or I  | 0 | 60  | N | Pass        |
| 653759 | F | Afar Regi A Level or I  | 0 | 120 | N | Withdrawn   |
| 653768 | M | Somalia Re Lower Than   | 0 | 90  | N | Fail        |
| 653770 | M | Somalia Re Lower Than   | 0 | 120 | N | Withdrawn   |
| 653771 | F | Addis Abak A Level or I | 0 | 120 | N | Withdrawn   |
| 653793 | M | Somalia Re A Level or I | 0 | 120 | N | Pass        |
| 653914 | F | South Wes Lower Than    | 0 | 60  | Y | Fail        |
| 653942 | M | Somalia Re Lower Than   | 0 | 90  | Y | Withdrawn   |
| 653977 | M | South Wes Lower Than    | 0 | 90  | N | Withdrawn   |
| 654091 | F | Sidamo Re Lower Than    | 0 | 60  | N | Withdrawn   |
| 654110 | M | Afar Regi Lower Than    | 0 | 60  | N | Pass        |

|        |   |                          |   |     |   |             |
|--------|---|--------------------------|---|-----|---|-------------|
| 654282 | M | North Regi Lower Tha     | 0 | 90  | N | Withdrawn   |
| 654341 | M | South Regi Lower Tha     | 0 | 120 | N | Pass        |
| 654401 | M | Afar Regio Lower Tha     | 0 | 60  | N | Fail        |
| 654414 | M | South Regi Lower Tha     | 0 | 60  | N | Pass        |
| 654443 | M | Sidamo Re Lower Tha      | 0 | 60  | N | Pass        |
| 654502 | F | Oromia Re A Level or I   | 0 | 90  | N | Withdrawn   |
| 654504 | M | Afar Regio A Level or I  | 0 | 120 | N | Pass        |
| 654807 | M | South Wes Lower Tha      | 0 | 90  | Y | Distinction |
| 654828 | M | North Regi A Level or I  | 0 | 120 | N | Withdrawn   |
| 654863 | M | Sidamo Re A Level or I   | 0 | 120 | N | Withdrawn   |
| 654880 | M | North Regi No Formal     | 0 | 90  | N | Withdrawn   |
| 654882 | M | South Regi Lower Tha     | 0 | 70  | N | Withdrawn   |
| 654938 | F | Sidamo Re Lower Tha      | 0 | 120 | N | Withdrawn   |
| 655039 | M | Sidamo Re A Level or I   | 0 | 120 | N | Pass        |
| 655128 | F | South Regi HE Qualific   | 0 | 60  | N | Pass        |
| 655136 | M | Afar Regio A Level or I  | 0 | 60  | N | Pass        |
| 655254 | M | Amhara Re Lower Tha      | 0 | 90  | N | Withdrawn   |
| 655322 | F | North Regi Post Gradu    | 0 | 90  | N | Withdrawn   |
| 655362 | M | Amhara Re A Level or I   | 0 | 150 | N | Pass        |
| 655585 | M | South Regi A Level or I  | 0 | 120 | N | Pass        |
| 655600 | M | Afar Regio Lower Tha     | 0 | 60  | N | Pass        |
| 655761 | M | Somalia Re Lower Tha     | 0 | 120 | N | Withdrawn   |
| 655806 | F | Afar Regio HE Qualific   | 0 | 60  | N | Fail        |
| 655816 | M | North Regi A Level or I  | 0 | 60  | N | Pass        |
| 655834 | F | Tigrai Regi A Level or I | 0 | 120 | N | Fail        |
| 655910 | M | Somalia Re A Level or I  | 0 | 120 | N | Withdrawn   |
| 655930 | F | Addis Abak A Level or I  | 0 | 120 | Y | Withdrawn   |
| 655972 | F | South Regi A Level or I  | 0 | 120 | N | Fail        |
| 656009 | F | South Regi Lower Tha     | 0 | 120 | N | Withdrawn   |
| 656073 | M | Addis Abak A Level or I  | 0 | 60  | N | Withdrawn   |
| 656079 | F | South Regi Lower Tha     | 0 | 90  | N | Withdrawn   |
| 656115 | F | South Regi Lower Tha     | 0 | 60  | N | Withdrawn   |
| 656164 | F | Somalia Re Lower Tha     | 0 | 60  | Y | Fail        |
| 656175 | F | South Regi A Level or I  | 0 | 60  | N | Withdrawn   |
| 656183 | F | Afar Regio Lower Tha     | 0 | 60  | N | Pass        |
| 656193 | M | South Regi A Level or I  | 0 | 120 | N | Fail        |
| 656280 | M | Amhara Re A Level or I   | 0 | 60  | N | Withdrawn   |
| 656393 | F | Sidamo Re A Level or I   | 0 | 120 | N | Fail        |
| 656454 | F | South Regi HE Qualific   | 0 | 60  | N | Pass        |
| 656459 | F | Sidamo Re Lower Tha      | 0 | 120 | N | Withdrawn   |
| 656496 | M | Afar Regio A Level or I  | 0 | 120 | N | Pass        |
| 656526 | M | Addis Abak HE Qualific   | 0 | 60  | N | Distinction |
| 656682 | M | Somalia Re A Level or I  | 0 | 120 | N | Withdrawn   |
| 656766 | M | Sidamo Re HE Qualific    | 0 | 60  | N | Distinction |
| 656826 | M | Afar Regio A Level or I  | 0 | 120 | N | Fail        |
| 656934 | F | Addis Abak Lower Tha     | 0 | 60  | N | Pass        |
| 656987 | M | Tigrai Regi HE Qualific  | 0 | 120 | N | Pass        |

|        |   |                          |   |     |   |             |
|--------|---|--------------------------|---|-----|---|-------------|
| 657071 | M | South Regi A Level or I  | 0 | 60  | Y | Fail        |
| 657077 | M | Sidamo Re A Level or I   | 0 | 60  | N | Pass        |
| 657161 | F | South Wes HE Qualific    | 0 | 120 | N | Withdrawn   |
| 657245 | M | Somalia Re A Level or I  | 0 | 90  | N | Pass        |
| 669530 | F | South Regi HE Qualific   | 1 | 90  | N | Fail        |
| 674193 | M | Sidamo Re A Level or I   | 0 | 60  | N | Withdrawn   |
| 674206 | F | North Regi HE Qualific   | 0 | 180 | N | Withdrawn   |
| 674219 | M | Amhara Re Lower Thar     | 0 | 60  | N | Withdrawn   |
| 674277 | M | South Wes A Level or I   | 0 | 120 | N | Withdrawn   |
| 674278 | F | Afar Regio HE Qualific   | 0 | 60  | N | Fail        |
| 674361 | M | Afar Regio A Level or I  | 0 | 120 | N | Withdrawn   |
| 674388 | M | Amhara Re Lower Thar     | 0 | 120 | N | Fail        |
| 674393 | F | Somalia Re A Level or I  | 0 | 120 | N | Withdrawn   |
| 674419 | M | South Regi Lower Thar    | 0 | 240 | Y | Withdrawn   |
| 674437 | M | Oromia Re A Level or I   | 0 | 60  | Y | Pass        |
| 674440 | M | Sidamo Re Lower Thar     | 0 | 180 | N | Fail        |
| 674469 | F | Sidamo Re A Level or I   | 0 | 60  | N | Withdrawn   |
| 674651 | M | Sidamo Re Lower Thar     | 0 | 60  | N | Withdrawn   |
| 674879 | F | North Regi Lower Thar    | 0 | 90  | Y | Distinction |
| 674989 | M | South Regi A Level or I  | 0 | 60  | N | Pass        |
| 674997 | M | North Regi A Level or I  | 0 | 60  | N | Fail        |
| 675050 | M | South Wes Lower Thar     | 0 | 60  | N | Withdrawn   |
| 675052 | F | Amhara Re A Level or I   | 0 | 120 | Y | Withdrawn   |
| 675062 | F | South Regi Lower Thar    | 0 | 60  | N | Pass        |
| 675144 | F | Sidamo Re Lower Thar     | 0 | 120 | N | Fail        |
| 675253 | F | Amhara Re Lower Thar     | 0 | 60  | N | Withdrawn   |
| 675256 | M | South Wes Lower Thar     | 0 | 120 | Y | Distinction |
| 675471 | M | Amhara Re HE Qualific    | 0 | 60  | N | Withdrawn   |
| 675493 | F | South Regi A Level or I  | 0 | 120 | N | Pass        |
| 675516 | M | Somalia Re HE Qualific   | 0 | 60  | N | Fail        |
| 675539 | F | Tigrai Regi Lower Thar   | 0 | 60  | N | Pass        |
| 675638 | F | Amhara Re HE Qualific    | 0 | 120 | N | Withdrawn   |
| 675656 | M | South Regi HE Qualific   | 0 | 120 | N | Withdrawn   |
| 675699 | F | Afar Regio A Level or I  | 0 | 60  | N | Fail        |
| 675919 | F | Afar Regio HE Qualific   | 0 | 60  | N | Pass        |
| 675945 | M | Afar Regio Lower Thar    | 0 | 60  | Y | Fail        |
| 675993 | M | Somalia Re Lower Thar    | 0 | 60  | N | Pass        |
| 676010 | M | South Regi A Level or I  | 0 | 120 | Y | Withdrawn   |
| 676087 | F | North Regi Post Gradu    | 0 | 90  | N | Distinction |
| 676138 | F | Tigrai Regi A Level or I | 0 | 120 | N | Fail        |
| 676155 | F | South Regi A Level or I  | 0 | 60  | N | Withdrawn   |
| 676204 | M | Sidamo Re Lower Thar     | 0 | 60  | N | Fail        |
| 676368 | F | Tigrai Regi HE Qualific  | 0 | 60  | N | Withdrawn   |
| 676373 | F | South Regi Lower Thar    | 0 | 120 | N | Fail        |
| 676498 | F | Sidamo Re HE Qualific    | 0 | 60  | N | Withdrawn   |
| 676516 | M | Sidamo Re A Level or I   | 0 | 60  | N | Pass        |
| 676538 | M | Sidamo Re Lower Thar     | 0 | 150 | N | Pass        |



|        |   |                          |   |     |   |             |
|--------|---|--------------------------|---|-----|---|-------------|
| 676553 | F | Oromia Re Lower Tha      | 0 | 60  | N | Fail        |
| 676589 | M | Amhara Re HE Qualific    | 0 | 60  | N | Pass        |
| 676596 | M | Tigrai Regi Lower Tha    | 0 | 150 | N | Pass        |
| 676642 | M | South Wes Lower Tha      | 0 | 60  | N | Withdrawn   |
| 676766 | M | South Regi Lower Tha     | 0 | 70  | N | Withdrawn   |
| 676787 | F | South Regi A Level or I  | 0 | 60  | N | Pass        |
| 676807 | F | Sidamo Re HE Qualific    | 0 | 60  | N | Distinction |
| 676809 | M | South Wes A Level or I   | 0 | 60  | N | Fail        |
| 676852 | M | Oromia Re A Level or I   | 0 | 120 | N | Distinction |
| 676865 | F | South Wes A Level or I   | 0 | 120 | N | Distinction |
| 676903 | M | Addis Abak A Level or I  | 0 | 60  | N | Pass        |
| 676963 | M | Afar Regioi A Level or I | 0 | 60  | N | Pass        |
| 676964 | F | Addis Abak Lower Tha     | 0 | 120 | N | Pass        |
| 677012 | F | South Regi A Level or I  | 0 | 240 | N | Withdrawn   |
| 677270 | M | Afar Regioi Lower Tha    | 0 | 120 | N | Withdrawn   |
| 677316 | M | Amhara Re HE Qualific    | 0 | 60  | N | Fail        |
| 677374 | F | South Wes Lower Tha      | 0 | 60  | N | Withdrawn   |
| 677444 | F | South Regi A Level or I  | 0 | 180 | N | Withdrawn   |
| 677449 | M | South Regi A Level or I  | 0 | 60  | Y | Withdrawn   |
| 677579 | F | Amhara Re A Level or I   | 0 | 90  | N | Fail        |
| 677601 | F | Afar Regioi Lower Tha    | 0 | 60  | N | Fail        |
| 677606 | F | South Regi A Level or I  | 0 | 180 | N | Fail        |
| 677629 | M | Oromia Re A Level or I   | 0 | 90  | N | Fail        |
| 677632 | F | South Regi A Level or I  | 0 | 60  | N | Withdrawn   |
| 677832 | M | Sidamo Re A Level or I   | 0 | 120 | N | Pass        |
| 677988 | F | Afar Regioi Lower Tha    | 0 | 60  | N | Withdrawn   |
| 678041 | M | North Regi Post Gradu    | 0 | 60  | N | Pass        |
| 678058 | M | South Wes Lower Tha      | 0 | 60  | N | Fail        |
| 678065 | F | Amhara Re A Level or I   | 0 | 60  | N | Fail        |
| 678102 | F | Afar Regioi A Level or I | 0 | 60  | N | Pass        |
| 678219 | M | Oromia Re A Level or I   | 0 | 60  | N | Withdrawn   |
| 678231 | M | South Regi A Level or I  | 0 | 60  | N | Withdrawn   |
| 678233 | F | Addis Abak A Level or I  | 0 | 60  | N | Pass        |
| 678240 | M | Afar Regioi HE Qualific  | 0 | 120 | N | Distinction |
| 678246 | F | Afar Regioi HE Qualific  | 0 | 180 | N | Withdrawn   |
| 678262 | F | South Wes A Level or I   | 0 | 120 | N | Withdrawn   |
| 678382 | M | South Wes Lower Tha      | 0 | 120 | N | Withdrawn   |
| 678490 | F | South Wes HE Qualific    | 0 | 120 | N | Pass        |
| 678605 | M | South Regi Lower Tha     | 0 | 150 | N | Fail        |
| 678737 | M | South Wes Lower Tha      | 0 | 120 | N | Withdrawn   |
| 678790 | M | Tigrai Regi A Level or I | 0 | 120 | N | Pass        |
| 678844 | M | Addis Abak HE Qualific   | 0 | 60  | N | Distinction |
| 678941 | M | South Wes HE Qualific    | 0 | 120 | N | Distinction |
| 679000 | M | Somalia Re Lower Tha     | 0 | 180 | Y | Withdrawn   |
| 679179 | M | Afar Regioi HE Qualific  | 0 | 90  | N | Fail        |
| 679234 | F | Addis Abak A Level or I  | 0 | 120 | N | Withdrawn   |
| 679255 | M | Amhara Re Lower Tha      | 0 | 60  | N | Withdrawn   |

|        |   |                         |   |     |   |             |
|--------|---|-------------------------|---|-----|---|-------------|
| 679388 | F | South Wes A Level or I  | 0 | 120 | N | Withdrawn   |
| 679395 | F | South Wes Lower Tha     | 0 | 60  | Y | Fail        |
| 679427 | M | Addis Abak Lower Tha    | 0 | 120 | N | Withdrawn   |
| 679454 | M | Sidamo Re A Level or I  | 0 | 60  | N | Pass        |
| 679525 | M | Sidamo Re A Level or I  | 0 | 90  | N | Pass        |
| 679558 | M | Addis Abak Lower Tha    | 0 | 180 | N | Withdrawn   |
| 679582 | M | South Regi A Level or I | 0 | 60  | N | Fail        |
| 679760 | M | Afar Regio Lower Tha    | 0 | 60  | N | Withdrawn   |
| 679777 | M | South Regi A Level or I | 0 | 60  | N | Pass        |
| 679854 | F | North Regi HE Qualific  | 0 | 90  | N | Distinction |
| 679897 | F | Sidamo Re Lower Tha     | 0 | 120 | N | Pass        |
| 680017 | M | South Regi A Level or I | 0 | 60  | N | Pass        |
| 680025 | F | South Regi Lower Tha    | 0 | 60  | N | Pass        |
| 680087 | M | Addis Abak A Level or I | 0 | 60  | N | Pass        |
| 680293 | F | North Regi A Level or I | 0 | 60  | N | Withdrawn   |
| 680314 | F | North Regi A Level or I | 0 | 150 | N | Withdrawn   |
| 680331 | M | Addis Abak A Level or I | 0 | 120 | Y | Fail        |
| 680373 | F | Amhara Re HE Qualific   | 0 | 60  | N | Withdrawn   |
| 680414 | M | Somalia Re A Level or I | 0 | 80  | N | Fail        |
| 680431 | M | Tigrai Regi Lower Tha   | 0 | 60  | N | Fail        |
| 680492 | M | Sidamo Re HE Qualific   | 0 | 90  | N | Pass        |
| 680612 | M | South Wes A Level or I  | 0 | 60  | N | Withdrawn   |
| 680626 | M | Sidamo Re Lower Tha     | 0 | 60  | N | Fail        |
| 680698 | M | Addis Abak A Level or I | 0 | 120 | N | Withdrawn   |
| 680728 | M | South Wes Lower Tha     | 0 | 60  | N | Fail        |
| 680733 | M | Addis Abak A Level or I | 0 | 120 | Y | Withdrawn   |
| 680764 | F | Addis Abak HE Qualific  | 0 | 120 | N | Withdrawn   |
| 680807 | M | Amhara Re HE Qualific   | 0 | 120 | N | Fail        |
| 680812 | M | Oromia Re A Level or I  | 0 | 60  | N | Fail        |
| 680817 | F | Sidamo Re A Level or I  | 0 | 120 | N | Pass        |
| 680846 | M | North Regi Lower Tha    | 0 | 60  | N | Withdrawn   |
| 680973 | M | Somalia Re A Level or I | 0 | 60  | N | Fail        |
| 680981 | M | Sidamo Re Lower Tha     | 0 | 120 | N | Withdrawn   |
| 680996 | M | South Wes A Level or I  | 0 | 120 | Y | Pass        |
| 681059 | M | Somalia Re A Level or I | 0 | 60  | N | Distinction |
| 681125 | M | South Wes Lower Tha     | 0 | 60  | N | Withdrawn   |
| 681182 | M | South Regi HE Qualific  | 0 | 60  | N | Withdrawn   |
| 681210 | M | Amhara Re Lower Tha     | 0 | 180 | N | Withdrawn   |
| 681211 | M | South Wes A Level or I  | 0 | 60  | N | Pass        |
| 681241 | F | South Regi A Level or I | 0 | 120 | Y | Pass        |
| 681356 | F | Afar Regio HE Qualific  | 0 | 90  | N | Pass        |
| 681425 | M | South Regi A Level or I | 0 | 60  | N | Pass        |
| 681440 | F | Oromia Re HE Qualific   | 0 | 120 | N | Pass        |
| 681495 | M | Amhara Re A Level or I  | 0 | 60  | N | Fail        |
| 681528 | M | South Wes A Level or I  | 0 | 120 | N | Fail        |
| 681638 | F | Sidamo Re A Level or I  | 0 | 120 | N | Withdrawn   |
| 681695 | F | Oromia Re Lower Tha     | 0 | 120 | N | Withdrawn   |

|        |   |                          |   |     |   |             |
|--------|---|--------------------------|---|-----|---|-------------|
| 681705 | M | Oromia Re Lower Tha      | 0 | 120 | N | Fail        |
| 681729 | F | South Regi A Level or I  | 0 | 90  | N | Distinction |
| 681746 | F | Oromia Re A Level or I   | 0 | 60  | N | Pass        |
| 681799 | M | Sidamo Re A Level or I   | 0 | 60  | N | Distinction |
| 681854 | M | Amhara Re A Level or I   | 0 | 60  | N | Withdrawn   |
| 681872 | M | Afar Regioi A Level or I | 0 | 60  | N | Fail        |
| 681923 | F | Addis Abak Lower Tha     | 0 | 60  | N | Fail        |
| 681960 | M | Sidamo Re Lower Tha      | 0 | 210 | N | Withdrawn   |
| 682018 | M | Sidamo Re Lower Tha      | 0 | 60  | N | Fail        |
| 682022 | M | Afar Regioi Lower Tha    | 0 | 60  | N | Pass        |
| 682031 | F | Amhara Re A Level or I   | 0 | 120 | N | Withdrawn   |
| 682117 | M | Addis Abak A Level or I  | 0 | 60  | N | Pass        |
| 682242 | F | South Regi A Level or I  | 0 | 90  | N | Fail        |
| 682294 | F | Somalia Re A Level or I  | 0 | 60  | N | Pass        |
| 682299 | M | Addis Abak Lower Tha     | 0 | 60  | N | Pass        |
| 682306 | F | Amhara Re HE Qualific    | 0 | 60  | N | Pass        |
| 682385 | F | Addis Abak Lower Tha     | 0 | 60  | Y | Fail        |
| 682541 | M | Addis Abak A Level or I  | 0 | 120 | N | Pass        |
| 682660 | M | Somalia Re Lower Tha     | 0 | 60  | N | Pass        |
| 682684 | M | South Wes A Level or I   | 0 | 60  | N | Pass        |
| 682692 | M | North Regi Lower Tha     | 0 | 90  | N | Pass        |
| 682740 | F | Amhara Re Lower Tha      | 0 | 120 | N | Pass        |
| 682787 | M | Amhara Re A Level or I   | 0 | 60  | N | Withdrawn   |
| 682813 | M | Amhara Re A Level or I   | 0 | 90  | N | Withdrawn   |
| 682819 | F | Afar Regioi HE Qualific  | 0 | 60  | N | Fail        |
| 682897 | F | Addis Abak A Level or I  | 0 | 120 | N | Pass        |
| 682968 | M | South Wes Lower Tha      | 0 | 60  | N | Pass        |
| 683091 | F | North Regi HE Qualific   | 0 | 60  | N | Distinction |
| 683340 | F | South Regi A Level or I  | 0 | 120 | N | Withdrawn   |
| 683396 | M | Sidamo Re HE Qualific    | 0 | 60  | N | Fail        |
| 683486 | M | Sidamo Re Lower Tha      | 0 | 60  | N | Withdrawn   |
| 683487 | F | Amhara Re Lower Tha      | 0 | 180 | Y | Withdrawn   |
| 683648 | F | Afar Regioi Lower Tha    | 0 | 60  | N | Pass        |
| 683653 | M | Oromia Re A Level or I   | 0 | 60  | N | Pass        |
| 683713 | F | Afar Regioi A Level or I | 0 | 120 | N | Pass        |
| 683718 | M | Afar Regioi A Level or I | 0 | 90  | N | Pass        |
| 684095 | M | Oromia Re A Level or I   | 0 | 90  | Y | Pass        |
| 684141 | M | Afar Regioi HE Qualific  | 0 | 60  | N | Pass        |
| 684215 | M | Oromia Re Lower Tha      | 0 | 60  | N | Withdrawn   |
| 684217 | M | Afar Regioi Lower Tha    | 0 | 60  | N | Pass        |
| 684233 | M | Amhara Re Lower Tha      | 0 | 60  | N | Pass        |
| 684241 | M | Addis Abak HE Qualific   | 0 | 60  | N | Distinction |
| 684305 | F | South Wes A Level or I   | 0 | 90  | N | Fail        |
| 684407 | M | South Regi A Level or I  | 0 | 60  | N | Distinction |
| 684441 | F | Addis Abak A Level or I  | 0 | 60  | N | Pass        |
| 684480 | M | Oromia Re HE Qualific    | 0 | 60  | N | Distinction |
| 684632 | F | South Wes A Level or I   | 0 | 60  | N | Distinction |

|        |   |                           |   |     |   |             |
|--------|---|---------------------------|---|-----|---|-------------|
| 684663 | M | Afar Region Lower Than    | 0 | 120 | Y | Fail        |
| 684712 | M | Addis Ababa HE Qualific   | 0 | 60  | N | Withdrawn   |
| 684744 | F | South Region A Level or   | 0 | 60  | N | Withdrawn   |
| 684854 | M | Tigray Region A Level or  | 0 | 60  | N | Pass        |
| 684868 | M | Addis Ababa A Level or    | 0 | 120 | N | Withdrawn   |
| 684886 | F | Oromia Region Lower Than  | 0 | 120 | N | Withdrawn   |
| 684887 | M | Oromia Region Lower Than  | 0 | 120 | N | Withdrawn   |
| 684936 | M | South Region A Level or   | 0 | 60  | N | Fail        |
| 685015 | M | South Region A Level or   | 0 | 150 | N | Pass        |
| 685033 | M | Addis Ababa A Level or    | 0 | 120 | N | Withdrawn   |
| 685069 | F | Oromia Region A Level or  | 0 | 120 | Y | Withdrawn   |
| 685085 | M | North Region Post Gradu   | 0 | 60  | N | Pass        |
| 685123 | M | Sidamo Region A Level or  | 0 | 60  | N | Withdrawn   |
| 685191 | M | South Region HE Qualific  | 0 | 90  | N | Distinction |
| 685224 | M | South Region A Level or   | 0 | 60  | N | Distinction |
| 685294 | M | South Region HE Qualific  | 0 | 60  | N | Pass        |
| 685403 | M | Oromia Region A Level or  | 0 | 60  | N | Withdrawn   |
| 685412 | M | Addis Ababa A Level or    | 0 | 120 | N | Distinction |
| 685458 | M | Amhara Region Lower Than  | 0 | 120 | N | Pass        |
| 685474 | M | North Region HE Qualific  | 0 | 90  | N | Withdrawn   |
| 685546 | M | North Region A Level or   | 0 | 90  | N | Withdrawn   |
| 685611 | M | Afar Region A Level or    | 0 | 90  | N | Pass        |
| 685615 | F | Tigray Region A Level or  | 0 | 90  | N | Pass        |
| 685623 | F | South Region A Level or   | 0 | 60  | N | Pass        |
| 685639 | M | South Region HE Qualific  | 0 | 60  | N | Withdrawn   |
| 685661 | F | South West A Level or     | 0 | 60  | N | Withdrawn   |
| 685697 | F | Sidamo Region A Level or  | 0 | 120 | N | Pass        |
| 685843 | M | Afar Region A Level or    | 0 | 60  | N | Pass        |
| 685910 | F | Afar Region Lower Than    | 0 | 60  | N | Fail        |
| 685964 | M | North Region Lower Than   | 0 | 120 | N | Distinction |
| 686003 | F | South West A Level or     | 0 | 210 | N | Withdrawn   |
| 686018 | M | North Region HE Qualific  | 0 | 90  | N | Pass        |
| 686038 | F | South Region Lower Than   | 0 | 60  | N | Pass        |
| 686078 | F | Afar Region A Level or    | 0 | 60  | N | Withdrawn   |
| 686268 | M | South Region A Level or   | 0 | 120 | N | Fail        |
| 686312 | F | Somalia Region Lower Than | 0 | 60  | N | Pass        |
| 686313 | F | Amhara Region A Level or  | 0 | 60  | N | Withdrawn   |
| 686370 | M | North Region A Level or   | 0 | 60  | N | Pass        |
| 686384 | M | Oromia Region A Level or  | 0 | 60  | N | Withdrawn   |
| 686399 | M | South Region Lower Than   | 0 | 120 | N | Pass        |
| 686549 | M | Somalia Region Lower Than | 0 | 60  | N | Fail        |
| 686584 | F | Amhara Region A Level or  | 0 | 120 | Y | Pass        |
| 686766 | F | North Region Lower Than   | 0 | 90  | Y | Pass        |
| 686838 | M | Afar Region Lower Than    | 0 | 120 | N | Fail        |
| 686854 | M | North Region A Level or   | 0 | 60  | N | Pass        |
| 686871 | M | South West A Level or     | 0 | 60  | N | Pass        |
| 687050 | F | Sidamo Region HE Qualific | 0 | 90  | N | Fail        |

|        |   |                          |   |     |   |             |
|--------|---|--------------------------|---|-----|---|-------------|
| 687244 | M | Somalia Re A Level or I  | 0 | 60  | N | Pass        |
| 687384 | M | North Regi Lower Tha     | 0 | 60  | N | Withdrawn   |
| 687411 | F | Afar Regioi A Level or I | 0 | 120 | Y | Distinction |
| 687446 | M | Addis Abak Lower Tha     | 0 | 60  | Y | Fail        |
| 687600 | F | Afar Regioi A Level or I | 0 | 120 | N | Pass        |
| 687715 | M | Oromia Re Lower Tha      | 0 | 60  | N | Withdrawn   |
| 687720 | M | Sidamo Re A Level or I   | 0 | 120 | N | Pass        |
| 687765 | F | Amhara Re Lower Tha      | 0 | 150 | N | Withdrawn   |
| 687777 | F | Afar Regioi Lower Tha    | 0 | 120 | N | Withdrawn   |
| 687781 | F | South Wes Lower Tha      | 0 | 60  | N | Pass        |
| 687792 | F | Tigrai Regio HE Qualific | 0 | 60  | N | Pass        |
| 687823 | M | Afar Regioi HE Qualific  | 0 | 120 | N | Pass        |
| 687835 | M | South Regi A Level or I  | 0 | 60  | N | Pass        |
| 687861 | M | Somalia Re A Level or I  | 0 | 120 | N | Pass        |
| 687975 | F | Somalia Re A Level or I  | 0 | 120 | N | Distinction |
| 687981 | M | Amhara Re Lower Tha      | 0 | 90  | N | Pass        |
| 688128 | F | South Regi Lower Tha     | 0 | 120 | N | Withdrawn   |
| 688171 | M | South Regi A Level or I  | 0 | 120 | Y | Withdrawn   |
| 688175 | M | Sidamo Re A Level or I   | 0 | 60  | N | Pass        |
| 688213 | M | Amhara Re A Level or I   | 0 | 120 | N | Withdrawn   |
| 688284 | M | South Regi Lower Tha     | 0 | 120 | N | Withdrawn   |
| 688285 | F | Somalia Re Lower Tha     | 0 | 120 | N | Withdrawn   |
| 688437 | M | South Regi A Level or I  | 0 | 120 | N | Pass        |
| 688525 | F | Addis Abak A Level or I  | 0 | 60  | N | Fail        |
| 688571 | M | Addis Abak A Level or I  | 0 | 60  | N | Pass        |
| 688592 | M | South Regi HE Qualific   | 0 | 60  | N | Pass        |
| 688608 | M | Sidamo Re Lower Tha      | 0 | 90  | N | Pass        |
| 688615 | F | Afar Regioi HE Qualific  | 0 | 90  | N | Withdrawn   |
| 688656 | F | Addis Abak No Formal     | 0 | 60  | N | Withdrawn   |
| 688665 | F | South Wes A Level or I   | 0 | 60  | N | Fail        |
| 688672 | M | Sidamo Re Lower Tha      | 0 | 90  | N | Withdrawn   |
| 688722 | F | South Wes A Level or I   | 0 | 60  | N | Pass        |
| 688805 | F | South Regi HE Qualific   | 0 | 120 | N | Withdrawn   |
| 688843 | F | Addis Abak A Level or I  | 0 | 180 | N | Fail        |
| 688849 | M | Afar Regioi Lower Tha    | 0 | 120 | N | Withdrawn   |
| 688911 | M | South Wes HE Qualific    | 0 | 60  | N | Pass        |
| 689017 | M | South Regi A Level or I  | 0 | 120 | N | Pass        |
| 689038 | F | South Wes A Level or I   | 0 | 120 | N | Fail        |
| 689050 | M | South Regi HE Qualific   | 0 | 120 | N | Pass        |
| 689135 | F | Sidamo Re A Level or I   | 0 | 60  | N | Pass        |
| 689143 | M | Sidamo Re A Level or I   | 0 | 120 | N | Withdrawn   |
| 689190 | F | Oromia Re A Level or I   | 0 | 90  | N | Pass        |
| 689198 | F | South Wes A Level or I   | 0 | 120 | Y | Withdrawn   |
| 689231 | M | Oromia Re A Level or I   | 0 | 60  | N | Pass        |
| 689346 | F | Amhara Re A Level or I   | 0 | 120 | Y | Withdrawn   |
| 689418 | M | Sidamo Re A Level or I   | 0 | 120 | N | Pass        |
| 689527 | F | Afar Regioi HE Qualific  | 0 | 120 | N | Fail        |

|        |   |             |              |   |     |   |             |
|--------|---|-------------|--------------|---|-----|---|-------------|
| 689574 | F | Sidamo Re   | A Level or I | 0 | 120 | N | Pass        |
| 689650 | M | South Regi  | A Level or I | 0 | 60  | N | Distinction |
| 689759 | M | Afar Regio  | Lower Thar   | 0 | 120 | N | Pass        |
| 689816 | F | Addis Abak  | Lower Thar   | 0 | 120 | N | Withdrawn   |
| 689900 | F | Afar Regio  | A Level or I | 0 | 120 | N | Withdrawn   |
| 689921 | F | Sidamo Re   | Lower Thar   | 0 | 60  | N | Pass        |
| 689956 | M | Afar Regio  | HE Qualific  | 0 | 60  | N | Pass        |
| 689990 | M | North Regi  | A Level or I | 0 | 120 | Y | Distinction |
| 689999 | F | Amhara Re   | A Level or I | 0 | 120 | N | Withdrawn   |
| 690118 | M | South Regi  | Lower Thar   | 0 | 120 | N | Withdrawn   |
| 690133 | F | Addis Abak  | A Level or I | 0 | 60  | N | Pass        |
| 690168 | F | Afar Regio  | HE Qualific  | 0 | 60  | N | Pass        |
| 690181 | F | Somalia Re  | A Level or I | 0 | 120 | N | Withdrawn   |
| 690192 | M | Addis Abak  | HE Qualific  | 0 | 60  | N | Pass        |
| 690225 | M | North Regi  | HE Qualific  | 0 | 60  | N | Fail        |
| 690240 | F | Sidamo Re   | A Level or I | 0 | 120 | N | Withdrawn   |
| 690298 | M | Amhara Re   | A Level or I | 0 | 120 | N | Fail        |
| 690365 | M | Afar Regio  | Lower Thar   | 0 | 90  | N | Pass        |
| 690600 | M | Afar Regio  | Lower Thar   | 0 | 120 | N | Withdrawn   |
| 690669 | M | Tigrai Regi | HE Qualific  | 0 | 210 | N | Withdrawn   |
| 690711 | M | Afar Regio  | HE Qualific  | 0 | 60  | N | Distinction |
| 690733 | M | South Wes   | HE Qualific  | 0 | 120 | N | Distinction |
| 690780 | F | Sidamo Re   | A Level or I | 0 | 120 | N | Withdrawn   |
| 690783 | M | Afar Regio  | Lower Thar   | 0 | 120 | N | Fail        |
| 690843 | M | Tigrai Regi | HE Qualific  | 0 | 180 | N | Withdrawn   |
| 690867 | M | North Regi  | Lower Thar   | 0 | 60  | Y | Withdrawn   |
| 690882 | F | Sidamo Re   | HE Qualific  | 0 | 60  | N | Pass        |
| 690884 | F | Sidamo Re   | A Level or I | 0 | 120 | N | Fail        |
| 690932 | M | Afar Regio  | A Level or I | 0 | 60  | N | Fail        |
| 691008 | M | Amhara Re   | A Level or I | 0 | 120 | N | Withdrawn   |
| 691040 | F | North Regi  | Lower Thar   | 0 | 120 | N | Withdrawn   |
| 691069 | F | North Regi  | Post Gradu   | 0 | 90  | N | Pass        |
| 691088 | F | Sidamo Re   | HE Qualific  | 0 | 60  | N | Fail        |
| 691202 | F | Addis Abak  | Lower Thar   | 0 | 60  | N | Pass        |
| 691207 | M | Afar Regio  | Lower Thar   | 0 | 60  | N | Pass        |
| 691212 | F | South Wes   | Lower Thar   | 0 | 90  | N | Fail        |
| 691257 | F | Sidamo Re   | A Level or I | 0 | 120 | N | Withdrawn   |
| 691428 | M | Sidamo Re   | A Level or I | 0 | 120 | N | Withdrawn   |
| 691444 | F | Addis Abak  | Lower Thar   | 0 | 120 | N | Fail        |
| 691640 | M | Somalia Re  | Lower Thar   | 0 | 60  | N | Withdrawn   |
| 691748 | M | Addis Abak  | Lower Thar   | 0 | 60  | N | Fail        |
| 691761 | M | Addis Abak  | Lower Thar   | 0 | 60  | N | Pass        |
| 691782 | F | Addis Abak  | Lower Thar   | 0 | 60  | N | Pass        |
| 691834 | F | Oromia Re   | A Level or I | 0 | 120 | N | Pass        |
| 692426 | M | Oromia Re   | A Level or I | 0 | 60  | N | Fail        |
| 692477 | M | Amhara Re   | HE Qualific  | 0 | 120 | N | Pass        |
| 692603 | F | Addis Abak  | A Level or I | 0 | 120 | Y | Distinction |

|        |   |                          |   |     |   |             |
|--------|---|--------------------------|---|-----|---|-------------|
| 692652 | M | Sidamo Re HE Qualific    | 0 | 60  | N | Distinction |
| 692664 | M | Amhara Re A Level or I   | 0 | 60  | N | Withdrawn   |
| 692753 | F | South Regi Lower Thar    | 0 | 60  | Y | Withdrawn   |
| 692850 | F | South Wes HE Qualific    | 0 | 120 | N | Withdrawn   |
| 693047 | M | Amhara Re Lower Thar     | 0 | 120 | Y | Withdrawn   |
| 693058 | M | Afar Regio A Level or I  | 0 | 120 | N | Distinction |
| 693061 | M | South Regi Lower Thar    | 0 | 60  | N | Withdrawn   |
| 693082 | F | Afar Regio HE Qualific   | 0 | 120 | N | Withdrawn   |
| 693085 | M | Sidamo Re A Level or I   | 0 | 60  | N | Pass        |
| 693145 | M | Addis Abak A Level or I  | 0 | 120 | N | Pass        |
| 693161 | M | Somalia Re Lower Thar    | 0 | 120 | N | Withdrawn   |
| 693294 | F | Sidamo Re A Level or I   | 0 | 120 | N | Fail        |
| 693310 | M | Sidamo Re Lower Thar     | 0 | 120 | N | Withdrawn   |
| 693441 | M | North Regi Lower Thar    | 0 | 120 | Y | Pass        |
| 693452 | M | North Regi A Level or I  | 0 | 60  | N | Pass        |
| 693468 | M | Oromia Re A Level or I   | 0 | 60  | Y | Withdrawn   |
| 693488 | M | South Regi Lower Thar    | 0 | 90  | N | Pass        |
| 693501 | M | North Regi HE Qualific   | 0 | 60  | N | Distinction |
| 693565 | M | Afar Regio Lower Thar    | 0 | 120 | N | Withdrawn   |
| 693569 | M | North Regi HE Qualific   | 0 | 60  | N | Pass        |
| 693606 | M | North Regi Lower Thar    | 0 | 60  | N | Pass        |
| 693863 | F | Addis Abak HE Qualific   | 0 | 120 | N | Withdrawn   |
| 693902 | M | Sidamo Re HE Qualific    | 0 | 120 | N | Distinction |
| 693926 | F | Amhara Re Lower Thar     | 0 | 60  | N | Withdrawn   |
| 694006 | M | South Regi A Level or I  | 0 | 60  | N | Pass        |
| 694010 | F | North Regi HE Qualific   | 0 | 120 | N | Pass        |
| 694019 | M | Tigrai Regi A Level or I | 0 | 60  | N | Withdrawn   |
| 694147 | M | Sidamo Re A Level or I   | 0 | 180 | N | Withdrawn   |
| 694225 | M | Tigrai Regi A Level or I | 0 | 60  | N | Withdrawn   |
| 694384 | F | South Wes A Level or I   | 0 | 60  | N | Pass        |
| 694634 | M | Addis Abak A Level or I  | 0 | 60  | Y | Pass        |
| 694673 | F | Somalia Re A Level or I  | 0 | 60  | N | Fail        |
| 694677 | M | Sidamo Re A Level or I   | 0 | 120 | N | Pass        |
| 694698 | M | North Regi HE Qualific   | 0 | 60  | N | Pass        |
| 694705 | M | South Regi Lower Thar    | 0 | 180 | Y | Withdrawn   |
| 694753 | M | South Wes A Level or I   | 0 | 120 | N | Withdrawn   |
| 694802 | M | Sidamo Re Lower Thar     | 0 | 120 | N | Withdrawn   |
| 694871 | M | North Regi Lower Thar    | 0 | 120 | N | Pass        |
| 694872 | M | Somalia Re A Level or I  | 0 | 120 | N | Distinction |
| 694976 | F | Addis Abak A Level or I  | 0 | 60  | N | Pass        |
| 695183 | M | Sidamo Re HE Qualific    | 0 | 60  | N | Distinction |
| 695201 | M | Sidamo Re A Level or I   | 0 | 120 | N | Pass        |
| 695270 | M | South Wes A Level or I   | 0 | 120 | N | Pass        |
| 695432 | M | South Regi A Level or I  | 0 | 180 | N | Pass        |
| 695473 | F | North Regi Lower Thar    | 0 | 180 | N | Withdrawn   |
| 695503 | F | Somalia Re A Level or I  | 0 | 60  | N | Pass        |
| 695584 | M | Sidamo Re Lower Thar     | 0 | 120 | N | Withdrawn   |

|         |   |                          |   |     |   |             |
|---------|---|--------------------------|---|-----|---|-------------|
| 695611  | M | Amhara Re A Level or I   | 0 | 120 | N | Withdrawn   |
| 695643  | F | South Regi A Level or I  | 0 | 150 | Y | Withdrawn   |
| 695651  | M | South Wes Lower Thar     | 0 | 60  | N | Pass        |
| 695735  | M | Addis Abak HE Qualific   | 0 | 60  | N | Fail        |
| 695739  | F | North Regi Lower Thar    | 0 | 150 | N | Pass        |
| 695759  | M | Somalia Re A Level or I  | 0 | 60  | N | Pass        |
| 695794  | M | South Regi Lower Thar    | 0 | 120 | N | Withdrawn   |
| 695799  | F | South Regi HE Qualific   | 0 | 60  | N | Withdrawn   |
| 695916  | M | South Wes A Level or I   | 0 | 90  | N | Pass        |
| 695956  | F | Tigrai Regi HE Qualific  | 0 | 120 | N | Withdrawn   |
| 696072  | M | Tigrai Regi A Level or I | 0 | 120 | N | Pass        |
| 696132  | M | Addis Abak Lower Thar    | 0 | 60  | N | Fail        |
| 696234  | M | Tigrai Regi HE Qualific  | 0 | 120 | N | Withdrawn   |
| 696265  | M | Sidamo Re A Level or I   | 0 | 120 | N | Withdrawn   |
| 696324  | M | Afar Regio HE Qualific   | 0 | 120 | N | Withdrawn   |
| 696415  | F | North Regi Lower Thar    | 0 | 60  | N | Pass        |
| 696430  | F | Sidamo Re A Level or I   | 0 | 60  | N | Fail        |
| 696501  | M | North Regi A Level or I  | 0 | 120 | Y | Withdrawn   |
| 696546  | M | South Wes Lower Thar     | 0 | 60  | N | Withdrawn   |
| 696789  | M | Tigrai Regi HE Qualific  | 0 | 60  | N | Pass        |
| 696807  | F | Amhara Re A Level or I   | 0 | 120 | N | Withdrawn   |
| 696826  | M | South Regi Lower Thar    | 0 | 120 | Y | Fail        |
| 696937  | M | South Wes Lower Thar     | 0 | 60  | N | Fail        |
| 697045  | M | South Regi A Level or I  | 0 | 120 | N | Distinction |
| 697101  | M | South Regi A Level or I  | 0 | 60  | N | Pass        |
| 697283  | F | Sidamo Re A Level or I   | 0 | 120 | N | Withdrawn   |
| 697352  | M | Tigrai Regi A Level or I | 0 | 90  | N | Fail        |
| 697390  | M | Oromia Re Lower Thar     | 0 | 120 | N | Withdrawn   |
| 697433  | M | Amhara Re Lower Thar     | 0 | 60  | N | Fail        |
| 697474  | F | South Regi A Level or I  | 0 | 60  | N | Pass        |
| 697674  | M | North Regi A Level or I  | 0 | 60  | N | Pass        |
| 697705  | M | Afar Regio A Level or I  | 0 | 60  | N | Fail        |
| 697730  | M | South Regi HE Qualific   | 0 | 120 | N | Withdrawn   |
| 697841  | M | North Regi Lower Thar    | 0 | 120 | N | Withdrawn   |
| 697948  | F | Sidamo Re A Level or I   | 0 | 150 | Y | Fail        |
| 698007  | M | Addis Abak A Level or I  | 0 | 60  | N | Withdrawn   |
| 698016  | M | South Wes A Level or I   | 0 | 90  | N | Fail        |
| 698252  | M | Sidamo Re HE Qualific    | 0 | 60  | N | Withdrawn   |
| 698347  | F | Afar Regio A Level or I  | 0 | 60  | N | Fail        |
| 698351  | M | Tigrai Regi HE Qualific  | 0 | 60  | N | Fail        |
| 698399  | M | Amhara Re A Level or I   | 0 | 120 | N | Fail        |
| 699417  | M | Afar Regio Lower Thar    | 0 | 60  | N | Pass        |
| 1033968 | F | Tigrai Regi No Formal    | 2 | 60  | N | Withdrawn   |
| 1078701 | F | South Wes HE Qualific    | 0 | 90  | N | Pass        |
| 1082062 | M | Amhara Re Lower Thar     | 0 | 60  | Y | Distinction |
| 1173473 | M | South Regi Lower Thar    | 0 | 60  | N | Pass        |
| 1197062 | F | Somalia Re Lower Thar    | 0 | 60  | N | Withdrawn   |



|         |   |                         |   |     |   |             |
|---------|---|-------------------------|---|-----|---|-------------|
| 1209065 | M | South Wes HE Qualific   | 0 | 60  | N | Withdrawn   |
| 1360878 | M | North Regi HE Qualific  | 0 | 90  | N | Pass        |
| 1373661 | M | Oromia Re A Level or I  | 0 | 60  | N | Withdrawn   |
| 1380308 | M | Tigrai Regi HE Qualific | 0 | 60  | N | Pass        |
| 1382719 | M | Amhara Re Lower Thar    | 0 | 60  | N | Fail        |
| 1438584 | M | Tigrai Regi Lower Thar  | 0 | 60  | Y | Withdrawn   |
| 1442215 | F | South Wes A Level or I  | 0 | 60  | Y | Withdrawn   |
| 1459010 | M | North Regi Lower Thar   | 0 | 180 | N | Withdrawn   |
| 1482413 | M | Addis Abak A Level or I | 0 | 60  | N | Fail        |
| 1484626 | M | Tigrai Regi HE Qualific | 0 | 90  | N | Withdrawn   |
| 1492408 | M | Afar Regioi Post Gradu  | 1 | 60  | N | Withdrawn   |
| 1526210 | F | South Wes A Level or I  | 0 | 60  | Y | Fail        |
| 1589066 | M | South Regi A Level or I | 0 | 60  | N | Pass        |
| 1591864 | F | Addis Abak HE Qualific  | 1 | 90  | N | Pass        |
| 1593730 | M | Afar Regioi Post Gradu  | 0 | 60  | N | Distinction |
| 1601739 | M | Afar Regioi HE Qualific | 1 | 60  | N | Withdrawn   |
| 1624025 | F | Addis Abak A Level or I | 1 | 60  | N | Pass        |
| 1661490 | M | South Regi A Level or I | 0 | 60  | N | Withdrawn   |
| 1667087 | M | Addis Abak A Level or I | 1 | 60  | N | Distinction |
| 1684787 | M | South Wes HE Qualific   | 1 | 90  | N | Pass        |
| 1687996 | M | Amhara Re Lower Thar    | 1 | 60  | N | Withdrawn   |
| 1723564 | M | Afar Regioi Lower Thar  | 0 | 180 | N | Pass        |
| 1733160 | M | Afar Regioi HE Qualific | 0 | 60  | Y | Withdrawn   |
| 1747824 | M | Sidamo Re HE Qualific   | 0 | 120 | N | Distinction |
| 1757548 | M | South Wes A Level or I  | 0 | 60  | N | Pass        |
| 1774297 | M | Amhara Re HE Qualific   | 0 | 120 | N | Pass        |
| 1777223 | F | Addis Abak Lower Thar   | 1 | 120 | N | Fail        |
| 1782581 | F | Addis Abak Lower Thar   | 1 | 60  | N | Fail        |
| 1794309 | M | Somalia Re Lower Thar   | 0 | 60  | N | Withdrawn   |
| 1804143 | M | Amhara Re A Level or I  | 2 | 60  | Y | Pass        |
| 1808407 | F | South Regi A Level or I | 0 | 60  | N | Withdrawn   |
| 1811098 | M | South Regi A Level or I | 0 | 120 | N | Withdrawn   |
| 1812797 | F | Addis Abak HE Qualific  | 0 | 90  | N | Withdrawn   |
| 1822731 | M | Afar Regioi Lower Thar  | 0 | 60  | N | Fail        |
| 1832492 | M | Afar Regioi No Formal   | 0 | 120 | N | Pass        |
| 1855583 | F | Afar Regioi HE Qualific | 0 | 60  | N | Pass        |
| 1871306 | F | South Regi A Level or I | 0 | 60  | Y | Withdrawn   |
| 1876461 | M | Afar Regioi HE Qualific | 0 | 120 | N | Withdrawn   |
| 1879751 | F | Somalia Re A Level or I | 0 | 60  | N | Distinction |
| 1881062 | F | Addis Abak Lower Thar   | 0 | 60  | N | Pass        |
| 1901764 | F | Sidamo Re HE Qualific   | 2 | 60  | N | Pass        |
| 1917311 | M | Afar Regioi HE Qualific | 0 | 60  | N | Pass        |
| 1925789 | M | Oromia Re HE Qualific   | 0 | 60  | N | Distinction |
| 1935155 | F | Sidamo Re A Level or I  | 0 | 60  | N | Pass        |
| 1935774 | M | South Wes A Level or I  | 3 | 60  | N | Fail        |
| 1986180 | M | South Wes Post Gradu    | 0 | 60  | N | Pass        |
| 1991049 | M | South Regi A Level or I | 1 | 60  | N | Withdrawn   |

|         |   |                          |   |     |   |             |
|---------|---|--------------------------|---|-----|---|-------------|
| 1991399 | F | Somalia Re Lower Tha     | 0 | 120 | N | Pass        |
| 2001461 | F | Sidamo Re Lower Tha      | 0 | 60  | N | Pass        |
| 2008795 | M | Afar Region HE Qualific  | 1 | 60  | N | Fail        |
| 2009279 | M | South Regi HE Qualific   | 0 | 150 | N | Withdrawn   |
| 2014252 | M | South Regi HE Qualific   | 1 | 60  | N | Withdrawn   |
| 2024838 | F | South Wes HE Qualific    | 0 | 60  | N | Withdrawn   |
| 2025354 | M | Afar Region HE Qualific  | 0 | 70  | N | Distinction |
| 2025589 | F | Sidamo Re HE Qualific    | 0 | 60  | N | Pass        |
| 2030241 | M | Addis Abak Lower Tha     | 0 | 150 | N | Withdrawn   |
| 2031234 | M | South Regi HE Qualific   | 2 | 60  | N | Withdrawn   |
| 2032882 | F | Somalia Re A Level or I  | 1 | 60  | Y | Pass        |
| 2038885 | F | South Regi Lower Tha     | 0 | 90  | N | Withdrawn   |
| 2039810 | M | Afar Region HE Qualific  | 1 | 60  | N | Distinction |
| 2043939 | M | Addis Abak HE Qualific   | 0 | 60  | N | Distinction |
| 2046628 | M | South Wes HE Qualific    | 3 | 120 | Y | Withdrawn   |
| 2055671 | F | Somalia Re A Level or I  | 0 | 60  | N | Withdrawn   |
| 2057959 | F | Oromia Re HE Qualific    | 0 | 60  | N | Distinction |
| 2075945 | F | South Wes A Level or I   | 0 | 90  | N | Pass        |
| 2082180 | M | Sidamo Re A Level or I   | 3 | 60  | N | Fail        |
| 2098108 | M | South Regi Lower Tha     | 0 | 120 | Y | Fail        |
| 2106468 | M | Afar Region A Level or I | 2 | 210 | N | Withdrawn   |
| 2111313 | M | South Wes HE Qualific    | 0 | 60  | N | Pass        |
| 2134578 | F | Addis Abak A Level or I  | 1 | 60  | N | Pass        |
| 2142243 | M | South Regi Lower Tha     | 0 | 60  | N | Pass        |
| 2143922 | M | Sidamo Re A Level or I   | 0 | 60  | N | Distinction |
| 2150849 | F | Amhara Re Lower Tha      | 0 | 120 | N | Withdrawn   |
| 2172709 | M | South Regi A Level or I  | 0 | 60  | N | Pass        |
| 2189620 | M | South Regi A Level or I  | 0 | 60  | N | Pass        |
| 2196923 | M | South Regi A Level or I  | 0 | 60  | N | Pass        |
| 2201235 | F | South Regi A Level or I  | 1 | 70  | N | Pass        |
| 2204941 | F | Addis Abak Lower Tha     | 0 | 60  | N | Withdrawn   |
| 2205559 | F | Sidamo Re A Level or I   | 0 | 60  | N | Withdrawn   |
| 2216442 | M | Sidamo Re No Formal      | 1 | 90  | N | Fail        |
| 2224174 | F | Afar Region A Level or I | 0 | 60  | N | Distinction |
| 2226202 | M | Sidamo Re Lower Tha      | 0 | 180 | Y | Pass        |
| 2231512 | M | Oromia Re HE Qualific    | 0 | 60  | N | Distinction |
| 2232340 | M | South Regi A Level or I  | 0 | 160 | N | Fail        |
| 2235019 | M | Addis Abak Lower Tha     | 2 | 60  | N | Fail        |
| 2257853 | M | Amhara Re A Level or I   | 0 | 120 | N | Pass        |
| 2260861 | M | Afar Region A Level or I | 0 | 60  | N | Pass        |
| 2269148 | F | Oromia Re A Level or I   | 1 | 90  | N | Withdrawn   |
| 2278095 | M | South Wes A Level or I   | 0 | 60  | N | Pass        |
| 2279403 | M | Sidamo Re Lower Tha      | 0 | 60  | N | Pass        |
| 2285405 | M | South Regi HE Qualific   | 0 | 130 | N | Pass        |
| 2285527 | M | South Wes A Level or I   | 0 | 120 | N | Pass        |
| 2288599 | M | North Regi Lower Tha     | 1 | 120 | N | Fail        |
| 2290604 | M | South Regi A Level or I  | 0 | 60  | N | Pass        |

|         |   |                          |   |     |   |             |
|---------|---|--------------------------|---|-----|---|-------------|
| 2305237 | M | South Wes HE Qualific    | 3 | 60  | N | Withdrawn   |
| 2307237 | M | Oromia Re A Level or I   | 0 | 60  | N | Fail        |
| 2310615 | F | North Regi A Level or I  | 0 | 60  | N | Pass        |
| 2314761 | M | Somalia Re A Level or I  | 1 | 60  | N | Pass        |
| 2317337 | F | Oromia Re Lower Than     | 0 | 60  | N | Withdrawn   |
| 2328759 | M | Amhara Re Lower Than     | 0 | 60  | N | Withdrawn   |
| 2333244 | F | Tigrai Regi HE Qualific  | 1 | 90  | N | Pass        |
| 2337919 | F | South Wes A Level or I   | 0 | 135 | Y | Withdrawn   |
| 2338290 | M | Addis Abak A Level or I  | 5 | 60  | N | Pass        |
| 2339789 | M | Afar Regio HE Qualific   | 0 | 150 | N | Distinction |
| 2341830 | F | Afar Regio HE Qualific   | 1 | 90  | N | Pass        |
| 2345307 | F | South Regi A Level or I  | 1 | 60  | Y | Withdrawn   |
| 2348143 | M | Amhara Re Lower Than     | 0 | 60  | N | Withdrawn   |
| 2355701 | M | Addis Abak HE Qualific   | 0 | 60  | N | Withdrawn   |
| 2357019 | F | Addis Abak A Level or I  | 0 | 145 | N | Pass        |
| 2369962 | M | South Regi Lower Than    | 0 | 60  | Y | Withdrawn   |
| 2391689 | F | South Regi Lower Than    | 0 | 60  | N | Pass        |
| 2396471 | F | Somalia Re A Level or I  | 0 | 60  | N | Pass        |
| 2396643 | F | South Regi A Level or I  | 0 | 60  | N | Fail        |
| 2398169 | F | South Regi A Level or I  | 0 | 60  | N | Fail        |
| 2400764 | F | Afar Regio HE Qualific   | 1 | 120 | N | Fail        |
| 2418277 | M | Somalia Re HE Qualific   | 0 | 60  | N | Pass        |
| 2423655 | F | Afar Regio A Level or I  | 1 | 60  | Y | Fail        |
| 2432655 | M | South Regi A Level or I  | 0 | 60  | N | Pass        |
| 2433216 | M | Afar Regio HE Qualific   | 2 | 120 | N | Fail        |
| 2452111 | M | South Regi Lower Than    | 0 | 120 | N | Withdrawn   |
| 2459418 | M | Somalia Re Lower Than    | 0 | 60  | N | Fail        |
| 2464683 | F | Somalia Re A Level or I  | 1 | 60  | Y | Withdrawn   |
| 2471673 | M | Sidamo Re HE Qualific    | 0 | 100 | N | Distinction |
| 2471812 | F | Afar Regio A Level or I  | 0 | 120 | N | Withdrawn   |
| 2476409 | M | Afar Regio HE Qualific   | 0 | 60  | N | Pass        |
| 2481629 | M | South Wes Lower Than     | 1 | 60  | N | Pass        |
| 2482085 | F | South Wes A Level or I   | 0 | 60  | N | Withdrawn   |
| 2484726 | F | South Regi HE Qualific   | 0 | 60  | N | Pass        |
| 2488965 | M | Oromia Re HE Qualific    | 0 | 60  | N | Withdrawn   |
| 2494306 | M | Tigrai Regi A Level or I | 0 | 90  | N | Pass        |
| 2499525 | F | South Wes A Level or I   | 0 | 60  | N | Pass        |
| 2507993 | M | South Wes HE Qualific    | 0 | 60  | N | Pass        |
| 2509321 | M | Sidamo Re Lower Than     | 0 | 60  | N | Pass        |
| 2516939 | M | Afar Regio Post Gradu    | 0 | 60  | N | Distinction |
| 2517387 | F | Addis Abak Lower Than    | 0 | 120 | N | Withdrawn   |
| 2524969 | F | Afar Regio A Level or I  | 0 | 120 | N | Withdrawn   |
| 2525964 | M | South Regi A Level or I  | 0 | 60  | N | Pass        |
| 2527066 | M | Somalia Re HE Qualific   | 1 | 60  | N | Pass        |
| 2533609 | M | Tigrai Regi HE Qualific  | 0 | 60  | N | Withdrawn   |
| 2542116 | M | Afar Regio HE Qualific   | 0 | 60  | N | Pass        |
| 2542803 | M | Tigrai Regi A Level or I | 1 | 60  | N | Withdrawn   |

|         |   |                          |   |     |   |             |
|---------|---|--------------------------|---|-----|---|-------------|
| 2544678 | M | Sidamo Re Lower Tha      | 1 | 60  | Y | Fail        |
| 2546595 | M | South Regi Lower Tha     | 0 | 60  | N | Withdrawn   |
| 2556345 | F | Amhara Re Lower Tha      | 2 | 60  | N | Withdrawn   |
| 2558893 | M | South Regi Lower Tha     | 0 | 120 | N | Withdrawn   |
| 2560520 | M | Amhara Re HE Qualific    | 0 | 60  | N | Distinction |
| 2561811 | M | Oromia Re Lower Tha      | 1 | 60  | N | Fail        |
| 2570274 | M | Amhara Re A Level or I   | 0 | 60  | N | Pass        |
| 2572145 | M | South Wes Lower Tha      | 1 | 60  | Y | Fail        |
| 2574453 | M | South Regi A Level or I  | 0 | 120 | N | Withdrawn   |
| 2588215 | M | Amhara Re Lower Tha      | 2 | 60  | Y | Fail        |
| 2588655 | M | Afar Regio Lower Tha     | 2 | 60  | N | Fail        |
| 2590864 | M | Amhara Re Lower Tha      | 0 | 60  | N | Pass        |
| 2595457 | M | Afar Regio HE Qualific   | 1 | 60  | N | Fail        |
| 2595526 | M | South Wes A Level or I   | 0 | 150 | N | Withdrawn   |
| 2595730 | F | South Wes Lower Tha      | 1 | 120 | N | Pass        |
| 2599883 | F | Afar Regio A Level or I  | 0 | 240 | N | Withdrawn   |
| 2600000 | M | South Regi Lower Tha     | 0 | 150 | N | Withdrawn   |
| 2605337 | M | Sidamo Re Lower Tha      | 0 | 60  | N | Pass        |
| 2612069 | M | Amhara Re A Level or I   | 0 | 60  | Y | Fail        |
| 2612342 | F | Sidamo Re Lower Tha      | 0 | 60  | N | Fail        |
| 2615169 | M | Tigrai Regi A Level or I | 1 | 60  | N | Pass        |
| 2615956 | F | Tigrai Regi A Level or I | 0 | 90  | N | Fail        |
| 2622441 | M | Sidamo Re Lower Tha      | 0 | 120 | N | Pass        |
| 2635658 | M | Sidamo Re Lower Tha      | 0 | 180 | N | Withdrawn   |
| 2636552 | F | Oromia Re Lower Tha      | 1 | 60  | Y | Fail        |
| 2639205 | M | South Wes A Level or I   | 0 | 120 | N | Withdrawn   |
| 2639339 | F | South Regi A Level or I  | 0 | 120 | N | Withdrawn   |
| 2641935 | F | Addis Abak HE Qualific   | 0 | 60  | N | Pass        |
| 2643240 | F | South Regi Lower Tha     | 1 | 60  | N | Withdrawn   |
| 2646737 | F | South Regi Lower Tha     | 2 | 150 | Y | Fail        |
| 2648271 | M | Afar Regio A Level or I  | 2 | 60  | N | Withdrawn   |
| 2650337 | M | South Wes A Level or I   | 0 | 120 | Y | Pass        |
| 2653689 | F | South Wes A Level or I   | 0 | 90  | N | Fail        |
| 2654602 | M | South Regi HE Qualific   | 1 | 130 | N | Withdrawn   |
| 2662152 | F | Amhara Re HE Qualific    | 0 | 60  | N | Pass        |
| 2668945 | M | Afar Regio A Level or I  | 2 | 60  | N | Fail        |
| 2672908 | M | Somalia Re A Level or I  | 0 | 120 | N | Withdrawn   |
| 2675393 | M | Amhara Re No Formal      | 0 | 60  | N | Fail        |
| 2677210 | M | Addis Abak Lower Tha     | 0 | 120 | N | Pass        |
| 2678380 | M | Oromia Re HE Qualific    | 0 | 120 | N | Pass        |
| 2680988 | F | North Regi Post Gradu    | 0 | 60  | N | Fail        |
| 2681782 | M | Afar Regio A Level or I  | 0 | 120 | Y | Withdrawn   |
| 2684043 | M | Addis Abak Lower Tha     | 0 | 120 | N | Pass        |
| 2685863 | F | Addis Abak Lower Tha     | 0 | 90  | N | Pass        |
| 2689863 | F | South Wes A Level or I   | 1 | 120 | N | Pass        |
| 2698109 | M | Addis Abak Lower Tha     | 0 | 60  | Y | Withdrawn   |
| 2716795 | F | Sidamo Re A Level or I   | 0 | 120 | N | Withdrawn   |

|        |   |             |              |   |     |   |             |
|--------|---|-------------|--------------|---|-----|---|-------------|
| 26915  | M | Tigrai Regi | Lower Tha    | 0 | 30  | N | Fail        |
| 32553  | M | Amhara Re   | A Level or l | 0 | 60  | N | Withdrawn   |
| 35355  | M | Tigrai Regi | Lower Tha    | 0 | 30  | N | Pass        |
| 40508  | M | South Regi  | A Level or l | 0 | 90  | N | Withdrawn   |
| 42638  | M | Afar Regio  | HE Qualific  | 0 | 60  | N | Pass        |
| 43564  | M | Afar Regio  | HE Qualific  | 0 | 60  | N | Pass        |
| 54062  | M | Addis Abak  | A Level or l | 0 | 30  | N | Distinction |
| 63112  | M | Oromia Re   | Lower Tha    | 0 | 60  | N | Pass        |
| 66713  | M | South Regi  | A Level or l | 0 | 60  | N | Pass        |
| 70214  | M | Tigrai Regi | Lower Tha    | 0 | 120 | N | Pass        |
| 76579  | F | Sidamo Re   | HE Qualific  | 0 | 60  | N | Withdrawn   |
| 88568  | M | Amhara Re   | HE Qualific  | 0 | 30  | N | Pass        |
| 96873  | M | Amhara Re   | A Level or l | 0 | 30  | N | Fail        |
| 100758 | F | Sidamo Re   | A Level or l | 0 | 150 | N | Withdrawn   |
| 101414 | M | Sidamo Re   | Lower Tha    | 0 | 105 | N | Withdrawn   |
| 105168 | M | Afar Regio  | HE Qualific  | 0 | 90  | N | Fail        |
| 107339 | F | Afar Regio  | HE Qualific  | 0 | 60  | N | Distinction |
| 110461 | M | Afar Regio  | HE Qualific  | 0 | 80  | N | Withdrawn   |
| 111383 | M | Sidamo Re   | Lower Tha    | 0 | 60  | N | Withdrawn   |
| 113698 | M | South Wes   | Lower Tha    | 0 | 30  | N | Fail        |
| 113824 | M | Addis Abak  | Lower Tha    | 0 | 120 | Y | Fail        |
| 117197 | F | South Regi  | A Level or l | 0 | 130 | N | Pass        |
| 125619 | M | Addis Abak  | Lower Tha    | 0 | 60  | Y | Withdrawn   |
| 126337 | M | South Regi  | Lower Tha    | 0 | 90  | N | Withdrawn   |
| 128929 | F | North Regi  | A Level or l | 0 | 145 | N | Distinction |
| 132123 | M | Oromia Re   | HE Qualific  | 0 | 60  | N | Pass        |
| 134982 | M | Tigrai Regi | Lower Tha    | 0 | 60  | N | Pass        |
| 140060 | M | South Regi  | A Level or l | 0 | 50  | N | Distinction |
| 140518 | M | South Regi  | Lower Tha    | 0 | 60  | N | Fail        |
| 141301 | M | South Regi  | Lower Tha    | 0 | 150 | N | Withdrawn   |
| 143711 | M | Addis Abak  | A Level or l | 0 | 60  | N | Distinction |
| 144448 | M | Amhara Re   | Lower Tha    | 0 | 110 | N | Distinction |
| 146125 | M | Sidamo Re   | Lower Tha    | 0 | 60  | N | Withdrawn   |
| 146974 | F | Sidamo Re   | A Level or l | 0 | 90  | N | Pass        |
| 153788 | M | Amhara Re   | No Formal    | 0 | 60  | N | Fail        |
| 160536 | F | South Regi  | Lower Tha    | 0 | 180 | Y | Pass        |
| 164968 | M | Afar Regio  | HE Qualific  | 0 | 45  | N | Pass        |
| 165509 | M | Sidamo Re   | A Level or l | 0 | 90  | N | Pass        |
| 171107 | F | South Regi  | A Level or l | 0 | 270 | Y | Withdrawn   |
| 173710 | M | Addis Abak  | HE Qualific  | 0 | 90  | N | Distinction |
| 173834 | F | South Regi  | HE Qualific  | 0 | 30  | N | Pass        |
| 174010 | M | Somalia Re  | Lower Tha    | 0 | 30  | N | Fail        |
| 176086 | M | Tigrai Regi | Lower Tha    | 0 | 30  | N | Fail        |
| 188273 | F | Addis Abak  | A Level or l | 0 | 60  | N | Pass        |
| 189629 | F | South Regi  | A Level or l | 0 | 30  | Y | Pass        |
| 191000 | M | Afar Regio  | Post Gradu   | 0 | 60  | N | Withdrawn   |
| 195234 | M | Afar Regio  | Lower Tha    | 0 | 30  | N | Fail        |

|        |   |                                  |   |     |   |             |
|--------|---|----------------------------------|---|-----|---|-------------|
| 197486 | M | Tigray Region HE Qualification   | 0 | 60  | N | Pass        |
| 197730 | M | Afar Region HE Qualification     | 0 | 140 | N | Withdrawn   |
| 200095 | M | Addis Ababa HE Qualification     | 0 | 30  | N | Pass        |
| 202677 | M | Sidamo Region Lower Than         | 0 | 60  | N | Pass        |
| 205425 | M | Addis Ababa A Level or Higher    | 0 | 60  | N | Distinction |
| 227192 | M | Sidamo Region Lower Than         | 0 | 60  | N | Pass        |
| 227811 | M | South Region A Level or Higher   | 0 | 30  | N | Withdrawn   |
| 231673 | M | Amhara Region HE Qualification   | 0 | 60  | N | Withdrawn   |
| 233311 | F | South West Lower Than            | 0 | 60  | N | Pass        |
| 233771 | M | South West A Level or Higher     | 0 | 60  | N | Pass        |
| 234311 | M | Afar Region A Level or Higher    | 0 | 60  | N | Pass        |
| 238249 | M | Addis Ababa A Level or Higher    | 0 | 30  | N | Fail        |
| 242778 | M | Afar Region HE Qualification     | 0 | 150 | N | Pass        |
| 242858 | M | Somalia Region A Level or Higher | 0 | 60  | N | Pass        |
| 245316 | M | Amhara Region Lower Than         | 0 | 30  | N | Fail        |
| 245494 | M | Afar Region HE Qualification     | 0 | 90  | N | Pass        |
| 245605 | M | South Region A Level or Higher   | 0 | 60  | N | Distinction |
| 246060 | M | South Region Lower Than          | 0 | 120 | N | Distinction |
| 248734 | M | North Region A Level or Higher   | 0 | 30  | N | Withdrawn   |
| 250047 | M | Afar Region HE Qualification     | 0 | 90  | N | Pass        |
| 255449 | M | Afar Region A Level or Higher    | 0 | 60  | N | Withdrawn   |
| 259662 | M | South Region Lower Than          | 0 | 120 | N | Pass        |
| 265769 | F | Addis Ababa A Level or Higher    | 0 | 90  | N | Pass        |
| 266915 | M | Amhara Region Lower Than         | 0 | 60  | N | Withdrawn   |
| 269764 | M | Afar Region HE Qualification     | 0 | 215 | N | Pass        |
| 270638 | M | South West Lower Than            | 0 | 60  | N | Pass        |
| 275162 | M | South West HE Qualification      | 0 | 55  | N | Fail        |
| 278786 | M | Afar Region Lower Than           | 0 | 255 | N | Withdrawn   |
| 280017 | M | South Region A Level or Higher   | 0 | 150 | N | Pass        |
| 281656 | M | North Region Lower Than          | 0 | 210 | Y | Fail        |
| 282585 | M | Afar Region Lower Than           | 0 | 90  | N | Fail        |
| 283133 | M | Somalia Region HE Qualification  | 0 | 120 | N | Distinction |
| 283811 | M | Amhara Region HE Qualification   | 0 | 60  | N | Withdrawn   |
| 286262 | M | South Region Lower Than          | 0 | 30  | Y | Withdrawn   |
| 286527 | F | Amhara Region A Level or Higher  | 0 | 120 | N | Withdrawn   |
| 288282 | M | Somalia Region Lower Than        | 0 | 30  | N | Pass        |
| 288769 | F | South West A Level or Higher     | 0 | 60  | N | Withdrawn   |
| 290382 | M | Sidamo Region Lower Than         | 0 | 60  | N | Distinction |
| 297853 | M | South West Lower Than            | 0 | 60  | N | Distinction |
| 300592 | M | South Region A Level or Higher   | 0 | 90  | N | Pass        |
| 305036 | M | Amhara Region Lower Than         | 0 | 30  | N | Pass        |
| 305783 | M | Addis Ababa Lower Than           | 0 | 60  | N | Pass        |
| 306150 | M | Afar Region A Level or Higher    | 0 | 90  | N | Pass        |
| 311845 | M | Afar Region A Level or Higher    | 0 | 30  | N | Distinction |
| 313501 | F | Somalia Region A Level or Higher | 0 | 30  | N | Pass        |
| 324332 | F | South Region A Level or Higher   | 0 | 60  | N | Pass        |
| 328844 | M | Oromia Region A Level or Higher  | 0 | 70  | N | Pass        |

|        |   |                            |   |     |   |             |
|--------|---|----------------------------|---|-----|---|-------------|
| 328942 | M | Somalia Re A Level or I    | 0 | 40  | N | Pass        |
| 329673 | M | North Regi Lower Tha       | 0 | 60  | N | Pass        |
| 330354 | F | South Regi Lower Tha       | 0 | 60  | N | Withdrawn   |
| 330530 | M | Amhara Re A Level or I     | 0 | 60  | N | Withdrawn   |
| 330937 | M | Addis Abak Lower Tha       | 0 | 60  | N | Withdrawn   |
| 333493 | M | South Regi Lower Tha       | 0 | 60  | N | Pass        |
| 333976 | M | South Regi A Level or I    | 0 | 30  | N | Fail        |
| 334154 | M | South Regi A Level or I    | 0 | 30  | N | Pass        |
| 336277 | M | Amhara Re A Level or I     | 0 | 60  | N | Withdrawn   |
| 336402 | F | Amhara Re A Level or I     | 0 | 40  | N | Pass        |
| 338894 | M | Somalia Re A Level or I    | 0 | 160 | N | Pass        |
| 339353 | M | Somalia Re A Level or I    | 0 | 120 | N | Withdrawn   |
| 339640 | M | South Regi A Level or I    | 0 | 60  | N | Pass        |
| 339785 | M | Addis Abak Lower Tha       | 0 | 60  | N | Pass        |
| 342962 | M | Somalia Re Lower Tha       | 0 | 60  | N | Pass        |
| 343543 | M | Amhara Re A Level or I     | 0 | 90  | N | Distinction |
| 344676 | F | Sidamo Re, A Level or I    | 0 | 120 | N | Pass        |
| 347518 | M | Afar Regioi A Level or I   | 0 | 120 | N | Pass        |
| 348351 | M | Somalia Re Lower Tha       | 0 | 30  | N | Pass        |
| 348655 | M | Sidamo Re, Lower Tha       | 0 | 60  | N | Pass        |
| 348708 | M | South Regi Lower Tha       | 0 | 60  | N | Withdrawn   |
| 355205 | M | South Regi Lower Tha       | 0 | 120 | N | Withdrawn   |
| 356568 | F | South Wes HE Qualific      | 0 | 240 | N | Pass        |
| 357493 | M | Addis Abak Lower Tha       | 0 | 60  | N | Fail        |
| 359590 | F | South Wes A Level or I     | 0 | 30  | Y | Withdrawn   |
| 363939 | M | South Regi Lower Tha       | 0 | 60  | N | Pass        |
| 365222 | M | Sidamo Re, HE Qualific     | 0 | 60  | N | Pass        |
| 365405 | M | Afar Regioi A Level or I   | 0 | 30  | N | Fail        |
| 365762 | M | Afar Regioi Lower Tha      | 0 | 30  | N | Withdrawn   |
| 368483 | M | Amhara Re HE Qualific      | 0 | 60  | N | Withdrawn   |
| 369119 | M | South Regi Lower Tha       | 0 | 90  | N | Fail        |
| 374192 | F | Oromia Re A Level or I     | 0 | 30  | Y | Distinction |
| 374739 | M | Afar Regioi A Level or I   | 0 | 30  | N | Pass        |
| 378920 | M | South Regi Lower Tha       | 0 | 60  | N | Distinction |
| 379528 | M | Addis Abak Lower Tha       | 0 | 30  | N | Pass        |
| 384797 | M | Amhara Re A Level or I     | 0 | 60  | N | Pass        |
| 387537 | M | Sidamo Re, A Level or I    | 0 | 30  | N | Pass        |
| 387648 | M | Amhara Re HE Qualific      | 0 | 60  | N | Pass        |
| 388252 | M | South Regi Lower Tha       | 0 | 60  | N | Withdrawn   |
| 388912 | M | Afar Regioi A Level or I   | 0 | 60  | N | Fail        |
| 388923 | M | North Regi A Level or I    | 0 | 60  | N | Pass        |
| 390029 | M | Tigrai Regioi A Level or I | 0 | 120 | N | Pass        |
| 391466 | F | South Wes A Level or I     | 0 | 90  | N | Pass        |
| 392250 | M | Oromia Re A Level or I     | 0 | 30  | N | Withdrawn   |
| 392994 | M | South Wes Lower Tha        | 0 | 30  | N | Distinction |
| 394060 | M | Addis Abak A Level or I    | 0 | 45  | N | Pass        |
| 396631 | M | Sidamo Re, A Level or I    | 0 | 60  | N | Pass        |

|        |   |                          |   |     |   |             |
|--------|---|--------------------------|---|-----|---|-------------|
| 397149 | M | South Regi Lower Tha     | 0 | 90  | N | Pass        |
| 397557 | M | Oromia Re A Level or I   | 0 | 30  | N | Pass        |
| 397797 | M | South Regi A Level or I  | 0 | 60  | N | Fail        |
| 398877 | M | Sidamo Re Lower Tha      | 0 | 90  | N | Pass        |
| 400208 | F | South Regi Lower Tha     | 0 | 30  | Y | Withdrawn   |
| 401011 | M | Tigrai Regi Lower Tha    | 0 | 30  | Y | Pass        |
| 401296 | F | Addis Abat A Level or I  | 0 | 60  | N | Pass        |
| 402808 | M | Addis Abat HE Qualific   | 0 | 60  | N | Withdrawn   |
| 404050 | M | South Regi Lower Tha     | 0 | 95  | N | Withdrawn   |
| 404449 | M | Amhara Re HE Qualific    | 0 | 30  | N | Pass        |
| 406121 | F | North Regi Lower Tha     | 0 | 60  | N | Pass        |
| 406549 | M | South Regi Lower Tha     | 0 | 60  | Y | Pass        |
| 407453 | M | Addis Abat A Level or I  | 0 | 60  | N | Pass        |
| 407876 | F | Addis Abat A Level or I  | 0 | 60  | N | Fail        |
| 411381 | M | Addis Abat A Level or I  | 0 | 90  | N | Withdrawn   |
| 412911 | M | Addis Abat A Level or I  | 0 | 60  | N | Pass        |
| 413190 | M | Addis Abat Lower Tha     | 0 | 60  | N | Fail        |
| 413702 | M | South Regi Lower Tha     | 0 | 120 | N | Withdrawn   |
| 416420 | M | Afar Regi HE Qualific    | 0 | 30  | N | Pass        |
| 417724 | M | Addis Abat Lower Tha     | 0 | 30  | Y | Distinction |
| 418900 | M | North Regi A Level or I  | 0 | 180 | N | Pass        |
| 419223 | M | Afar Regi A Level or I   | 0 | 60  | N | Pass        |
| 420173 | M | North Regi HE Qualific   | 0 | 40  | N | Distinction |
| 425274 | M | North Regi Lower Tha     | 0 | 90  | N | Pass        |
| 425714 | M | South Regi Lower Tha     | 0 | 60  | N | Fail        |
| 427413 | M | Afar Regi HE Qualific    | 0 | 30  | N | Distinction |
| 431014 | M | Addis Abat A Level or I  | 0 | 60  | N | Fail        |
| 434562 | M | South Wes A Level or I   | 0 | 60  | N | Distinction |
| 434573 | M | South Regi A Level or I  | 0 | 60  | N | Fail        |
| 434759 | M | Amhara Re A Level or I   | 0 | 40  | N | Distinction |
| 435277 | M | Sidamo Re A Level or I   | 0 | 90  | N | Distinction |
| 438283 | M | South Wes A Level or I   | 0 | 60  | Y | Fail        |
| 440610 | M | Afar Regi No Formal      | 0 | 45  | N | Pass        |
| 441540 | M | Oromia Re Lower Tha      | 0 | 60  | N | Pass        |
| 441858 | M | Somalia Re A Level or I  | 0 | 60  | N | Pass        |
| 442807 | M | Somalia Re Lower Tha     | 0 | 60  | N | Pass        |
| 442937 | M | Sidamo Re Lower Tha      | 0 | 60  | N | Withdrawn   |
| 443181 | M | Sidamo Re A Level or I   | 0 | 60  | N | Pass        |
| 444403 | M | Tigrai Regi A Level or I | 0 | 30  | N | Pass        |
| 444925 | M | South Wes A Level or I   | 0 | 30  | N | Withdrawn   |
| 445972 | M | Addis Abat Post Gradu    | 0 | 60  | N | Distinction |
| 446324 | M | Afar Regi A Level or I   | 0 | 60  | Y | Pass        |
| 446397 | M | Afar Regi HE Qualific    | 0 | 30  | N | Withdrawn   |
| 465392 | M | Somalia Re HE Qualific   | 0 | 30  | N | Distinction |
| 465564 | M | South Wes Lower Tha      | 0 | 60  | N | Pass        |
| 465619 | M | Tigrai Regi Lower Tha    | 0 | 120 | N | Fail        |
| 465777 | F | Sidamo Re HE Qualific    | 0 | 30  | N | Pass        |



|        |   |                |                   |   |     |   |             |
|--------|---|----------------|-------------------|---|-----|---|-------------|
| 465845 | M | Afar Region    | A Level or Higher | 0 | 30  | Y | Withdrawn   |
| 466430 | M | South West     | No Formal         | 0 | 120 | N | Withdrawn   |
| 466961 | M | South West     | A Level or Higher | 0 | 30  | N | Pass        |
| 467302 | M | Sidamo Region  | HE Qualification  | 0 | 60  | N | Pass        |
| 467363 | M | South West     | A Level or Higher | 0 | 60  | N | Withdrawn   |
| 468902 | M | South West     | Lower Than        | 0 | 60  | N | Pass        |
| 469113 | M | Oromia Region  | A Level or Higher | 0 | 60  | N | Pass        |
| 469281 | M | North Region   | Lower Than        | 0 | 30  | N | Pass        |
| 469959 | M | Tigray Region  | A Level or Higher | 0 | 30  | N | Fail        |
| 470002 | M | Tigray Region  | HE Qualification  | 0 | 90  | N | Withdrawn   |
| 470534 | F | Oromia Region  | Lower Than        | 0 | 120 | N | Withdrawn   |
| 470674 | M | Sidamo Region  | A Level or Higher | 0 | 90  | N | Withdrawn   |
| 471580 | M | Sidamo Region  | Lower Than        | 0 | 90  | N | Pass        |
| 472087 | M | Somalia Region | HE Qualification  | 0 | 60  | N | Pass        |
| 472290 | M | North Region   | A Level or Higher | 0 | 90  | N | Pass        |
| 472336 | M | Afar Region    | A Level or Higher | 0 | 50  | N | Pass        |
| 472857 | M | Tigray Region  | A Level or Higher | 0 | 60  | N | Pass        |
| 473706 | M | South West     | Lower Than        | 0 | 60  | N | Fail        |
| 473739 | M | South Region   | Lower Than        | 0 | 30  | N | Pass        |
| 473943 | M | Tigray Region  | Lower Than        | 0 | 60  | N | Fail        |
| 475370 | M | Amhara Region  | Lower Than        | 0 | 60  | N | Pass        |
| 475893 | M | South Region   | A Level or Higher | 0 | 60  | N | Pass        |
| 478212 | M | Afar Region    | HE Qualification  | 0 | 60  | N | Fail        |
| 478435 | M | South West     | Lower Than        | 0 | 30  | N | Fail        |
| 478562 | M | Somalia Region | A Level or Higher | 0 | 45  | N | Pass        |
| 479753 | F | Afar Region    | A Level or Higher | 0 | 60  | Y | Pass        |
| 480115 | M | Oromia Region  | A Level or Higher | 0 | 60  | N | Distinction |
| 481934 | M | Afar Region    | Post Graduate     | 0 | 60  | N | Withdrawn   |
| 482012 | M | South Region   | A Level or Higher | 0 | 30  | N | Pass        |
| 482406 | M | South Region   | A Level or Higher | 0 | 30  | N | Pass        |
| 482726 | F | South Region   | Post Graduate     | 0 | 50  | N | Pass        |
| 483108 | F | Amhara Region  | A Level or Higher | 0 | 120 | N | Pass        |
| 483706 | M | Addis Ababa    | Lower Than        | 0 | 30  | N | Pass        |
| 484361 | M | Tigray Region  | No Formal         | 0 | 30  | N | Fail        |
| 485374 | F | Afar Region    | A Level or Higher | 0 | 60  | N | Pass        |
| 485582 | M | Afar Region    | HE Qualification  | 0 | 30  | Y | Pass        |
| 485898 | M | Afar Region    | HE Qualification  | 0 | 60  | N | Pass        |
| 485909 | M | Somalia Region | A Level or Higher | 0 | 60  | N | Pass        |
| 486545 | M | South West     | A Level or Higher | 0 | 60  | Y | Pass        |
| 486964 | M | Afar Region    | Lower Than        | 0 | 60  | N | Fail        |
| 487588 | M | Somalia Region | A Level or Higher | 0 | 30  | N | Distinction |
| 487621 | M | Somalia Region | A Level or Higher | 0 | 60  | N | Pass        |
| 490081 | M | Addis Ababa    | Lower Than        | 0 | 85  | N | Distinction |
| 490327 | M | Amhara Region  | A Level or Higher | 0 | 120 | N | Withdrawn   |
| 490768 | M | Sidamo Region  | Lower Than        | 0 | 60  | N | Distinction |
| 491578 | M | Sidamo Region  | Lower Than        | 0 | 30  | N | Pass        |
| 491771 | M | Amhara Region  | HE Qualification  | 0 | 60  | N | Pass        |

|        |   |                         |   |     |   |             |
|--------|---|-------------------------|---|-----|---|-------------|
| 493743 | M | Oromia Re A Level or    | 0 | 90  | N | Withdrawn   |
| 493876 | M | Sidamo Re A Level or    | 0 | 90  | N | Pass        |
| 493988 | M | Addis Abak A Level or   | 0 | 60  | N | Pass        |
| 494211 | M | Addis Abak A Level or   | 0 | 30  | N | Distinction |
| 494383 | M | Sidamo Re A Level or    | 0 | 60  | N | Withdrawn   |
| 495887 | M | Somalia Re A Level or   | 0 | 60  | N | Pass        |
| 499400 | M | Somalia Re A Level or   | 0 | 60  | N | Distinction |
| 499881 | F | South Wes A Level or    | 0 | 60  | N | Pass        |
| 500189 | M | Afar Regio A Level or   | 0 | 60  | N | Pass        |
| 500779 | M | Addis Abak HE Qualific  | 0 | 30  | N | Pass        |
| 501918 | M | Sidamo Re A Level or    | 0 | 60  | N | Fail        |
| 501921 | M | Somalia Re A Level or   | 0 | 30  | N | Distinction |
| 502303 | M | Sidamo Re A Level or    | 0 | 60  | N | Fail        |
| 502393 | M | Addis Abak A Level or   | 0 | 60  | N | Pass        |
| 502479 | M | Afar Regio HE Qualific  | 0 | 60  | Y | Withdrawn   |
| 502833 | M | Afar Regio Lower Than   | 0 | 90  | N | Fail        |
| 503015 | M | Tigrai Regi HE Qualific | 0 | 60  | N | Withdrawn   |
| 504404 | M | Amhara Re Lower Than    | 0 | 30  | N | Pass        |
| 504492 | M | Afar Regio HE Qualific  | 0 | 60  | N | Distinction |
| 505700 | M | South Regi Lower Than   | 0 | 30  | N | Pass        |
| 505722 | M | Amhara Re A Level or    | 0 | 60  | N | Pass        |
| 505727 | M | Afar Regio HE Qualific  | 0 | 60  | N | Pass        |
| 506504 | M | South Regi Lower Than   | 0 | 30  | N | Pass        |
| 506618 | M | South Wes HE Qualific   | 0 | 120 | N | Withdrawn   |
| 507300 | M | Afar Regio Lower Than   | 0 | 30  | N | Fail        |
| 507375 | F | Addis Abak Lower Than   | 0 | 60  | N | Pass        |
| 507844 | M | South Wes A Level or    | 0 | 30  | Y | Pass        |
| 508244 | F | Sidamo Re HE Qualific   | 0 | 30  | N | Pass        |
| 508829 | M | Sidamo Re A Level or    | 0 | 60  | N | Fail        |
| 509156 | M | Addis Abak A Level or   | 0 | 30  | N | Fail        |
| 509402 | M | Afar Regio Lower Than   | 0 | 30  | N | Fail        |
| 510169 | M | Amhara Re A Level or    | 0 | 90  | N | Withdrawn   |
| 510401 | M | Sidamo Re HE Qualific   | 0 | 30  | N | Pass        |
| 510460 | M | North Regi HE Qualific  | 0 | 30  | N | Pass        |
| 510694 | M | Amhara Re Lower Than    | 0 | 60  | N | Pass        |
| 512693 | M | Addis Abak HE Qualific  | 0 | 60  | N | Withdrawn   |
| 514040 | M | South Regi HE Qualific  | 0 | 90  | N | Withdrawn   |
| 515774 | M | Afar Regio A Level or   | 0 | 60  | N | Distinction |
| 515821 | M | Somalia Re A Level or   | 0 | 60  | N | Fail        |
| 516047 | M | North Regi HE Qualific  | 0 | 60  | N | Withdrawn   |
| 518805 | M | South Regi A Level or   | 0 | 30  | N | Withdrawn   |
| 518906 | M | Amhara Re Lower Than    | 0 | 60  | N | Withdrawn   |
| 519258 | M | South Wes Lower Than    | 0 | 60  | N | Withdrawn   |
| 519684 | M | Afar Regio HE Qualific  | 0 | 30  | N | Pass        |
| 520337 | M | Addis Abak A Level or   | 0 | 90  | N | Withdrawn   |
| 521542 | M | Afar Regio A Level or   | 0 | 90  | N | Fail        |
| 522484 | M | South Regi A Level or   | 0 | 60  | N | Distinction |

|        |   |                |             |   |     |   |             |
|--------|---|----------------|-------------|---|-----|---|-------------|
| 522994 | M | Afar Region    | A Level or  | 0 | 60  | N | Pass        |
| 523169 | M | Addis Ababa    | A Level or  | 0 | 60  | N | Pass        |
| 524631 | M | Afar Region    | A Level or  | 0 | 30  | N | Fail        |
| 525246 | M | Afar Region    | Lower Than  | 0 | 60  | N | Pass        |
| 525703 | M | Addis Ababa    | A Level or  | 0 | 60  | N | Pass        |
| 526051 | M | Addis Ababa    | Lower Than  | 0 | 90  | Y | Withdrawn   |
| 526073 | M | Amhara Region  | A Level or  | 0 | 60  | N | Pass        |
| 528021 | M | South Region   | Lower Than  | 0 | 60  | N | Pass        |
| 528083 | M | Oromia Region  | A Level or  | 0 | 60  | N | Pass        |
| 528961 | F | Afar Region    | A Level or  | 0 | 30  | N | Fail        |
| 529503 | M | Afar Region    | Lower Than  | 0 | 60  | N | Withdrawn   |
| 529509 | M | Afar Region    | A Level or  | 0 | 30  | N | Fail        |
| 529512 | M | Afar Region    | A Level or  | 0 | 30  | N | Pass        |
| 530172 | M | South West     | Lower Than  | 0 | 60  | N | Withdrawn   |
| 530360 | M | South Region   | Lower Than  | 0 | 30  | N | Fail        |
| 530765 | M | Afar Region    | A Level or  | 0 | 60  | N | Pass        |
| 531097 | M | Amhara Region  | A Level or  | 0 | 30  | Y | Fail        |
| 532491 | M | South Region   | A Level or  | 0 | 60  | N | Pass        |
| 533012 | M | Afar Region    | A Level or  | 0 | 90  | N | Fail        |
| 533311 | M | Oromia Region  | A Level or  | 0 | 60  | N | Pass        |
| 534371 | M | South West     | A Level or  | 0 | 90  | N | Pass        |
| 535259 | M | Somalia Region | HE Qualific | 0 | 30  | N | Distinction |
| 537929 | M | North Region   | A Level or  | 0 | 60  | N | Pass        |
| 538040 | F | South West     | A Level or  | 0 | 60  | N | Fail        |
| 538887 | M | South West     | Lower Than  | 0 | 60  | N | Pass        |
| 539063 | F | Sidamo Region  | HE Qualific | 0 | 30  | N | Pass        |
| 539695 | M | Amhara Region  | Lower Than  | 0 | 60  | Y | Fail        |
| 539775 | M | Oromia Region  | A Level or  | 0 | 60  | N | Withdrawn   |
| 539990 | M | Tigray Region  | Lower Than  | 0 | 30  | N | Pass        |
| 541040 | M | Somalia Region | Lower Than  | 0 | 30  | N | Fail        |
| 541174 | M | South Region   | A Level or  | 0 | 120 | N | Pass        |
| 543417 | M | Somalia Region | A Level or  | 0 | 60  | N | Pass        |
| 543474 | M | South Region   | A Level or  | 0 | 90  | N | Pass        |
| 543576 | M | Amhara Region  | Lower Than  | 0 | 30  | N | Fail        |
| 544383 | M | Oromia Region  | Lower Than  | 0 | 60  | N | Distinction |
| 544791 | M | Afar Region    | A Level or  | 0 | 60  | N | Pass        |
| 545740 | M | South West     | A Level or  | 0 | 60  | N | Distinction |
| 545758 | M | South Region   | Lower Than  | 0 | 150 | N | Pass        |
| 546604 | M | Somalia Region | Lower Than  | 0 | 60  | N | Pass        |
| 547173 | M | South Region   | Lower Than  | 0 | 30  | N | Distinction |
| 547424 | M | Oromia Region  | A Level or  | 0 | 60  | N | Pass        |
| 548861 | M | Sidamo Region  | Lower Than  | 0 | 60  | N | Pass        |
| 548992 | M | Sidamo Region  | A Level or  | 0 | 60  | N | Withdrawn   |
| 548994 | M | Oromia Region  | A Level or  | 0 | 150 | N | Pass        |
| 549139 | M | Somalia Region | Lower Than  | 0 | 30  | N | Withdrawn   |
| 549262 | M | South West     | A Level or  | 0 | 60  | N | Pass        |
| 549681 | M | Somalia Region | Lower Than  | 0 | 30  | Y | Pass        |

|        |   |                          |   |     |   |             |
|--------|---|--------------------------|---|-----|---|-------------|
| 549960 | M | South Regi Lower Tha     | 0 | 60  | N | Distinction |
| 550025 | M | Sidamo Re Lower Tha      | 0 | 60  | N | Pass        |
| 550059 | M | South Wes Lower Tha      | 0 | 60  | N | Fail        |
| 550393 | M | Sidamo Re Lower Tha      | 0 | 60  | N | Pass        |
| 551017 | F | Sidamo Re A Level or I   | 0 | 30  | N | Pass        |
| 551182 | M | South Regi Lower Tha     | 0 | 60  | N | Withdrawn   |
| 551430 | M | Addis Abak Lower Tha     | 0 | 120 | N | Withdrawn   |
| 552485 | M | South Wes A Level or I   | 0 | 30  | N | Fail        |
| 552795 | M | Amhara Re A Level or I   | 0 | 60  | N | Pass        |
| 553568 | M | South Wes A Level or I   | 0 | 60  | N | Withdrawn   |
| 553943 | M | Addis Abak A Level or I  | 0 | 30  | N | Fail        |
| 554052 | M | North Regi HE Qualific   | 0 | 30  | N | Distinction |
| 554132 | M | South Regi A Level or I  | 0 | 60  | Y | Fail        |
| 554235 | M | Amhara Re Lower Tha      | 0 | 60  | N | Withdrawn   |
| 554459 | M | Amhara Re A Level or I   | 0 | 60  | N | Fail        |
| 554583 | M | Afar Regioi Lower Tha    | 0 | 90  | N | Pass        |
| 554999 | M | Amhara Re A Level or I   | 0 | 120 | Y | Withdrawn   |
| 555020 | M | Oromia Re Lower Tha      | 0 | 30  | N | Withdrawn   |
| 555228 | M | North Regi A Level or I  | 0 | 60  | Y | Pass        |
| 555447 | M | Sidamo Re A Level or I   | 0 | 60  | N | Pass        |
| 555925 | M | Addis Abak A Level or I  | 0 | 90  | N | Withdrawn   |
| 556109 | M | South Wes Lower Tha      | 0 | 60  | N | Pass        |
| 556177 | M | Addis Abak A Level or I  | 0 | 90  | N | Pass        |
| 556211 | M | North Regi HE Qualific   | 0 | 60  | N | Pass        |
| 556231 | F | Sidamo Re A Level or I   | 0 | 30  | N | Fail        |
| 556450 | M | Afar Regioi A Level or I | 0 | 90  | Y | Fail        |
| 556521 | M | Addis Abak A Level or I  | 0 | 60  | Y | Pass        |
| 556645 | M | Addis Abak A Level or I  | 0 | 60  | N | Pass        |
| 556709 | M | South Wes A Level or I   | 0 | 60  | N | Fail        |
| 556742 | M | Addis Abak Lower Tha     | 0 | 30  | N | Fail        |
| 556836 | M | Addis Abak A Level or I  | 0 | 150 | N | Withdrawn   |
| 557147 | M | Oromia Re A Level or I   | 0 | 120 | N | Pass        |
| 557415 | M | South Wes A Level or I   | 0 | 60  | N | Pass        |
| 557490 | M | North Regi Lower Tha     | 0 | 60  | N | Fail        |
| 558054 | M | North Regi Lower Tha     | 0 | 30  | N | Pass        |
| 558444 | F | Sidamo Re Lower Tha      | 0 | 180 | N | Fail        |
| 558463 | M | South Regi Lower Tha     | 0 | 60  | N | Pass        |
| 559519 | M | Afar Regioi A Level or I | 0 | 30  | N | Fail        |
| 559551 | M | Oromia Re Lower Tha      | 0 | 30  | N | Fail        |
| 559617 | F | Addis Abak Lower Tha     | 0 | 90  | Y | Pass        |
| 559645 | M | North Regi HE Qualific   | 0 | 60  | N | Fail        |
| 559758 | M | Afar Regioi Lower Tha    | 0 | 30  | N | Pass        |
| 559912 | M | Somalia Re Lower Tha     | 0 | 60  | N | Pass        |
| 560326 | M | Sidamo Re Lower Tha      | 0 | 90  | N | Withdrawn   |
| 560502 | M | Somalia Re A Level or I  | 0 | 30  | Y | Fail        |
| 560723 | M | Afar Regioi Lower Tha    | 0 | 30  | N | Pass        |
| 560734 | M | Somalia Re A Level or I  | 0 | 120 | N | Fail        |

|        |   |                         |   |     |   |             |
|--------|---|-------------------------|---|-----|---|-------------|
| 560784 | M | South Regi Lower Tha    | 0 | 60  | N | Pass        |
| 560876 | M | South Regi Lower Tha    | 0 | 60  | N | Pass        |
| 560924 | M | South Wes Lower Tha     | 0 | 60  | N | Withdrawn   |
| 560928 | M | South Regi A Level or I | 0 | 60  | N | Pass        |
| 561054 | M | Sidamo Re Lower Tha     | 0 | 60  | N | Fail        |
| 561192 | M | South Regi Lower Tha    | 0 | 90  | N | Pass        |
| 561208 | M | Addis Abat A Level or I | 0 | 30  | N | Fail        |
| 561519 | M | Amhara Re Lower Tha     | 0 | 60  | N | Withdrawn   |
| 561740 | M | South Regi Lower Tha    | 0 | 30  | N | Withdrawn   |
| 561787 | M | South Wes Lower Tha     | 0 | 120 | N | Withdrawn   |
| 561826 | F | Sidamo Re HE Qualific   | 0 | 30  | N | Pass        |
| 562315 | M | South Wes Lower Tha     | 0 | 60  | Y | Withdrawn   |
| 562675 | M | Sidamo Re Lower Tha     | 0 | 30  | N | Withdrawn   |
| 563418 | F | Afar Regio A Level or I | 0 | 90  | N | Distinction |
| 563666 | M | Somalia Re A Level or I | 0 | 60  | N | Pass        |
| 563967 | M | South Regi A Level or I | 0 | 60  | N | Pass        |
| 563990 | M | Sidamo Re Lower Tha     | 0 | 60  | N | Withdrawn   |
| 564444 | M | Sidamo Re Lower Tha     | 0 | 60  | N | Withdrawn   |
| 564700 | M | South Regi Lower Tha    | 0 | 120 | N | Pass        |
| 564714 | M | Addis Abat HE Qualific  | 0 | 30  | Y | Pass        |
| 564894 | M | South Regi Lower Tha    | 0 | 60  | N | Distinction |
| 565275 | M | South Regi A Level or I | 0 | 150 | N | Withdrawn   |
| 565561 | M | Oromia Re HE Qualific   | 0 | 60  | N | Fail        |
| 565883 | M | Afar Regio Lower Tha    | 0 | 60  | N | Pass        |
| 566071 | M | South Wes Lower Tha     | 0 | 60  | N | Fail        |
| 566201 | M | Amhara Re Lower Tha     | 0 | 60  | N | Pass        |
| 566306 | M | Amhara Re A Level or I  | 0 | 60  | N | Withdrawn   |
| 566310 | M | Afar Regio A Level or I | 0 | 60  | N | Distinction |
| 566664 | M | Sidamo Re A Level or I  | 0 | 90  | N | Pass        |
| 566970 | M | Addis Abat A Level or I | 0 | 60  | N | Withdrawn   |
| 567752 | M | Addis Abat A Level or I | 0 | 60  | Y | Pass        |
| 567779 | M | Addis Abat Lower Tha    | 0 | 30  | N | Fail        |
| 567892 | M | Oromia Re A Level or I  | 0 | 60  | N | Fail        |
| 567950 | M | South Regi A Level or I | 0 | 60  | N | Fail        |
| 568751 | M | Amhara Re HE Qualific   | 0 | 120 | N | Withdrawn   |
| 568813 | M | South Regi A Level or I | 0 | 60  | N | Pass        |
| 569342 | M | South Regi Lower Tha    | 0 | 135 | N | Pass        |
| 569358 | M | Afar Regio HE Qualific  | 0 | 30  | N | Pass        |
| 569560 | M | South Regi A Level or I | 0 | 90  | N | Pass        |
| 569694 | M | Amhara Re Lower Tha     | 0 | 60  | N | Distinction |
| 569706 | M | South Regi A Level or I | 0 | 120 | Y | Pass        |
| 570377 | M | Amhara Re Lower Tha     | 0 | 60  | N | Withdrawn   |
| 570414 | M | South Wes Lower Tha     | 0 | 60  | N | Fail        |
| 570448 | M | Sidamo Re A Level or I  | 0 | 30  | N | Fail        |
| 570453 | M | Amhara Re A Level or I  | 0 | 30  | N | Pass        |
| 570488 | M | Somalia Re A Level or I | 0 | 60  | N | Withdrawn   |
| 570626 | M | South Wes Lower Tha     | 0 | 30  | N | Pass        |

|        |   |                         |   |     |   |             |
|--------|---|-------------------------|---|-----|---|-------------|
| 571186 | M | Sidamo Re A Level or I  | 0 | 60  | N | Pass        |
| 571443 | F | Somalia Re HE Qualific  | 0 | 60  | N | Distinction |
| 571448 | F | South Regi A Level or I | 0 | 60  | N | Pass        |
| 571595 | M | Afar Regio Lower Than   | 0 | 90  | N | Fail        |
| 571610 | M | South Regi HE Qualific  | 0 | 120 | N | Pass        |
| 571617 | M | Amhara Re A Level or I  | 0 | 60  | N | Withdrawn   |
| 571620 | M | Amhara Re Lower Than    | 0 | 60  | N | Pass        |
| 571686 | M | South Regi Lower Than   | 0 | 60  | N | Pass        |
| 571710 | M | Sidamo Re Lower Than    | 0 | 60  | N | Withdrawn   |
| 571711 | M | South Wes Lower Than    | 0 | 60  | N | Withdrawn   |
| 571754 | M | Oromia Re A Level or I  | 0 | 30  | N | Withdrawn   |
| 571818 | M | Sidamo Re A Level or I  | 0 | 60  | N | Distinction |
| 571963 | M | North Regi A Level or I | 0 | 90  | N | Withdrawn   |
| 571992 | M | Sidamo Re Lower Than    | 0 | 120 | N | Fail        |
| 572021 | M | Sidamo Re Lower Than    | 0 | 60  | N | Fail        |
| 572024 | M | Afar Regio HE Qualific  | 0 | 60  | N | Pass        |
| 572080 | M | Sidamo Re A Level or I  | 0 | 60  | N | Fail        |
| 572146 | M | South Wes Lower Than    | 0 | 30  | N | Fail        |
| 572154 | M | Afar Regio HE Qualific  | 0 | 150 | N | Withdrawn   |
| 572168 | M | South Regi HE Qualific  | 0 | 90  | N | Withdrawn   |
| 572186 | M | South Regi A Level or I | 0 | 60  | Y | Withdrawn   |
| 572279 | M | Addis Abak Lower Than   | 0 | 90  | N | Fail        |
| 572303 | M | Afar Regio HE Qualific  | 0 | 90  | N | Pass        |
| 572396 | M | South Wes Lower Than    | 0 | 60  | N | Pass        |
| 572403 | M | South Wes A Level or I  | 0 | 30  | N | Fail        |
| 572515 | M | Tigrai Regi Lower Than  | 0 | 60  | Y | Distinction |
| 572570 | M | Afar Regio A Level or I | 0 | 60  | N | Pass        |
| 572602 | M | South Regi A Level or I | 0 | 60  | N | Pass        |
| 572658 | M | North Regi Lower Than   | 0 | 60  | N | Withdrawn   |
| 572659 | M | Sidamo Re Lower Than    | 0 | 90  | N | Withdrawn   |
| 572891 | M | Sidamo Re A Level or I  | 0 | 60  | N | Pass        |
| 572944 | M | Addis Abak Lower Than   | 0 | 60  | N | Fail        |
| 573110 | M | Addis Abak Lower Than   | 0 | 60  | N | Withdrawn   |
| 573153 | M | Sidamo Re Lower Than    | 0 | 90  | N | Pass        |
| 573200 | M | Somalia Re Lower Than   | 0 | 60  | N | Distinction |
| 573214 | M | South Wes HE Qualific   | 0 | 60  | N | Pass        |
| 573242 | M | South Regi A Level or I | 0 | 60  | N | Withdrawn   |
| 573244 | M | Oromia Re A Level or I  | 0 | 60  | N | Withdrawn   |
| 573292 | M | South Wes A Level or I  | 0 | 75  | N | Pass        |
| 573336 | M | South Regi A Level or I | 0 | 60  | N | Pass        |
| 573377 | M | Oromia Re Lower Than    | 0 | 60  | N | Pass        |
| 573440 | M | Afar Regio Lower Than   | 0 | 120 | N | Distinction |
| 573462 | F | Tigrai Regi HE Qualific | 0 | 60  | N | Fail        |
| 573547 | M | Addis Abak Lower Than   | 0 | 90  | N | Withdrawn   |
| 573550 | M | Tigrai Regi Lower Than  | 0 | 30  | N | Pass        |
| 573593 | M | Somalia Re A Level or I | 0 | 60  | N | Pass        |
| 573662 | M | Sidamo Re A Level or I  | 0 | 60  | N | Pass        |

|        |   |                                 |   |     |   |             |
|--------|---|---------------------------------|---|-----|---|-------------|
| 573701 | M | Afar Region Lower Than          | 0 | 150 | N | Withdrawn   |
| 573742 | M | Addis Ababa Lower Than          | 0 | 60  | N | Pass        |
| 573920 | M | South Region A Level or Higher  | 0 | 120 | N | Pass        |
| 573944 | F | South Region Lower Than         | 0 | 240 | N | Withdrawn   |
| 574038 | M | South Region Lower Than         | 0 | 60  | N | Pass        |
| 574101 | M | South West Lower Than           | 0 | 60  | N | Fail        |
| 574259 | M | South West HE Qualification     | 0 | 30  | N | Distinction |
| 574399 | M | South West Lower Than           | 0 | 30  | N | Fail        |
| 574507 | M | South Region Lower Than         | 0 | 30  | N | Pass        |
| 574586 | M | South West A Level or Higher    | 0 | 90  | N | Pass        |
| 574608 | M | Afar Region A Level or Higher   | 0 | 60  | N | Pass        |
| 574670 | M | Sidamo Region A Level or Higher | 0 | 60  | N | Withdrawn   |
| 574830 | F | Afar Region Lower Than          | 0 | 90  | N | Pass        |
| 574888 | M | South West Lower Than           | 0 | 60  | N | Fail        |
| 574983 | M | South West Lower Than           | 0 | 60  | N | Pass        |
| 575047 | M | South Region A Level or Higher  | 0 | 60  | N | Pass        |
| 575166 | M | Addis Ababa A Level or Higher   | 0 | 60  | N | Pass        |
| 575208 | M | South Region Lower Than         | 0 | 60  | N | Withdrawn   |
| 575241 | M | South Region Lower Than         | 0 | 60  | N | Pass        |
| 575318 | M | Amhara Region HE Qualification  | 0 | 60  | N | Fail        |
| 575336 | M | Addis Ababa Lower Than          | 0 | 60  | N | Pass        |
| 575343 | M | Afar Region HE Qualification    | 0 | 30  | N | Fail        |
| 575401 | M | North Region A Level or Higher  | 0 | 60  | N | Distinction |
| 575419 | M | South Region Lower Than         | 0 | 90  | N | Fail        |
| 575469 | M | Sidamo Region HE Qualification  | 0 | 60  | N | Withdrawn   |
| 575545 | M | Afar Region HE Qualification    | 0 | 60  | N | Pass        |
| 575553 | M | South West A Level or Higher    | 0 | 30  | N | Pass        |
| 575601 | M | Sidamo Region A Level or Higher | 0 | 60  | N | Withdrawn   |
| 575703 | M | Addis Ababa A Level or Higher   | 0 | 60  | N | Pass        |
| 575733 | M | Tigray Region Lower Than        | 0 | 60  | N | Distinction |
| 575745 | F | North Region HE Qualification   | 0 | 130 | N | Pass        |
| 575762 | M | Sidamo Region HE Qualification  | 0 | 60  | N | Pass        |
| 575763 | M | Amhara Region A Level or Higher | 0 | 30  | N | Pass        |
| 575764 | F | Amhara Region A Level or Higher | 0 | 90  | N | Pass        |
| 576036 | M | Oromia Region A Level or Higher | 0 | 60  | N | Pass        |
| 576191 | M | Afar Region HE Qualification    | 0 | 120 | N | Fail        |
| 576202 | M | North Region Lower Than         | 0 | 60  | N | Fail        |
| 576292 | M | Somalia Region Lower Than       | 0 | 60  | N | Fail        |
| 576298 | M | Tigray Region HE Qualification  | 0 | 30  | N | Withdrawn   |
| 576301 | M | North Region HE Qualification   | 0 | 60  | N | Withdrawn   |
| 576405 | M | Afar Region HE Qualification    | 0 | 60  | Y | Pass        |
| 576409 | M | South Region A Level or Higher  | 0 | 90  | N | Withdrawn   |
| 576439 | M | Addis Ababa Lower Than          | 0 | 30  | N | Pass        |
| 576481 | F | Oromia Region Lower Than        | 0 | 60  | N | Withdrawn   |
| 576516 | M | Addis Ababa A Level or Higher   | 0 | 60  | N | Pass        |
| 576606 | M | Afar Region HE Qualification    | 0 | 90  | N | Withdrawn   |
| 576631 | M | North Region A Level or Higher  | 0 | 60  | N | Fail        |

|        |   |                          |   |     |   |             |
|--------|---|--------------------------|---|-----|---|-------------|
| 576750 | M | South Regi HE Qualific   | 0 | 60  | N | Pass        |
| 576834 | M | South Wes A Level or I   | 0 | 60  | N | Withdrawn   |
| 576909 | M | South Regi A Level or I  | 0 | 60  | N | Distinction |
| 576962 | M | Sidamo Re A Level or I   | 0 | 60  | N | Fail        |
| 577148 | M | Sidamo Re A Level or I   | 0 | 30  | N | Fail        |
| 577235 | M | Amhara Re Lower Than     | 0 | 90  | N | Pass        |
| 577352 | M | Addis Abak Lower Than    | 0 | 120 | N | Withdrawn   |
| 577427 | M | Afar Regioi A Level or I | 0 | 90  | N | Pass        |
| 577551 | M | North Regi A Level or I  | 0 | 90  | N | Pass        |
| 577560 | M | South Wes HE Qualific    | 0 | 60  | N | Fail        |
| 577603 | M | North Regi Lower Than    | 0 | 120 | N | Withdrawn   |
| 577686 | M | North Regi A Level or I  | 0 | 60  | N | Pass        |
| 577735 | M | Oromia Re A Level or I   | 0 | 60  | N | Pass        |
| 577784 | F | Oromia Re A Level or I   | 0 | 60  | N | Pass        |
| 577887 | M | Somalia Re A Level or I  | 0 | 90  | N | Withdrawn   |
| 577995 | M | Somalia Re Lower Than    | 0 | 60  | N | Distinction |
| 578000 | M | Sidamo Re Lower Than     | 0 | 60  | N | Pass        |
| 578034 | M | North Regi A Level or I  | 0 | 60  | N | Pass        |
| 578056 | M | Sidamo Re A Level or I   | 0 | 60  | N | Fail        |
| 578438 | M | South Wes A Level or I   | 0 | 60  | N | Pass        |
| 578450 | F | Addis Abak Lower Than    | 0 | 120 | N | Fail        |
| 578472 | M | Afar Regioi Lower Than   | 0 | 60  | N | Fail        |
| 578623 | M | Tigrai Regi A Level or I | 0 | 120 | N | Withdrawn   |
| 578654 | M | Sidamo Re Lower Than     | 0 | 150 | N | Fail        |
| 578722 | M | Somalia Re Lower Than    | 0 | 30  | N | Withdrawn   |
| 578725 | M | Afar Regioi HE Qualific  | 0 | 60  | N | Fail        |
| 578736 | M | Afar Regioi HE Qualific  | 0 | 90  | N | Pass        |
| 578820 | M | South Regi A Level or I  | 0 | 60  | N | Pass        |
| 579011 | M | Amhara Re A Level or I   | 0 | 60  | N | Pass        |
| 579027 | M | Afar Regioi HE Qualific  | 0 | 90  | N | Fail        |
| 579098 | M | South Wes Lower Than     | 0 | 120 | N | Withdrawn   |
| 579130 | M | South Regi A Level or I  | 0 | 30  | Y | Pass        |
| 579199 | F | Somalia Re Lower Than    | 0 | 90  | N | Fail        |
| 579206 | M | Tigrai Regi A Level or I | 0 | 60  | N | Fail        |
| 579321 | M | Oromia Re Lower Than     | 0 | 180 | N | Withdrawn   |
| 579340 | M | South Regi Lower Than    | 0 | 90  | N | Distinction |
| 579343 | M | South Regi HE Qualific   | 0 | 60  | N | Distinction |
| 579499 | M | South Wes Lower Than     | 0 | 60  | N | Withdrawn   |
| 579604 | M | Amhara Re Lower Than     | 0 | 30  | N | Fail        |
| 579723 | M | Oromia Re Lower Than     | 0 | 60  | N | Pass        |
| 580372 | M | Sidamo Re HE Qualific    | 0 | 60  | N | Fail        |
| 580689 | M | Afar Regioi HE Qualific  | 0 | 90  | Y | Withdrawn   |
| 580719 | F | Afar Regioi HE Qualific  | 0 | 60  | N | Distinction |
| 580774 | M | Tigrai Regi Lower Than   | 0 | 120 | N | Fail        |
| 580970 | M | South Regi A Level or I  | 0 | 60  | N | Pass        |
| 581011 | M | South Regi Lower Than    | 0 | 30  | N | Withdrawn   |
| 581047 | M | Somalia Re A Level or I  | 0 | 90  | N | Withdrawn   |



|        |   |                          |   |     |   |             |
|--------|---|--------------------------|---|-----|---|-------------|
| 581123 | M | South Regi A Level or I  | 0 | 150 | N | Pass        |
| 581179 | M | Oromia Re Lower Tha      | 0 | 30  | N | Pass        |
| 581234 | M | Amhara Re A Level or I   | 0 | 60  | N | Pass        |
| 581340 | M | Afar Regio HE Qualific   | 0 | 60  | N | Distinction |
| 581438 | M | Addis Abak A Level or I  | 0 | 60  | N | Distinction |
| 581439 | M | South Regi HE Qualific   | 0 | 60  | N | Fail        |
| 581453 | F | North Regi A Level or I  | 0 | 60  | N | Withdrawn   |
| 581533 | M | South Wes A Level or I   | 0 | 60  | N | Pass        |
| 581708 | M | Sidamo Re A Level or I   | 0 | 30  | N | Pass        |
| 581716 | F | South Wes Lower Tha      | 0 | 180 | N | Pass        |
| 581744 | M | Oromia Re Lower Tha      | 0 | 60  | N | Pass        |
| 581914 | M | Afar Regio HE Qualific   | 0 | 90  | N | Pass        |
| 582087 | M | Afar Regio Lower Tha     | 0 | 90  | N | Pass        |
| 582170 | M | South Regi A Level or I  | 0 | 60  | N | Withdrawn   |
| 582514 | M | South Regi A Level or I  | 0 | 60  | N | Pass        |
| 582723 | M | North Regi Lower Tha     | 0 | 60  | N | Pass        |
| 582768 | M | South Wes A Level or I   | 0 | 90  | Y | Fail        |
| 582827 | M | Addis Abak A Level or I  | 0 | 60  | N | Pass        |
| 582913 | M | Addis Abak Lower Tha     | 0 | 60  | N | Distinction |
| 582983 | M | Amhara Re A Level or I   | 0 | 60  | N | Withdrawn   |
| 583032 | M | Afar Regio HE Qualific   | 0 | 60  | N | Distinction |
| 583052 | M | Addis Abak A Level or I  | 0 | 60  | N | Pass        |
| 583186 | M | Amhara Re Lower Tha      | 0 | 90  | N | Fail        |
| 583192 | F | Afar Regio HE Qualific   | 0 | 75  | N | Pass        |
| 583238 | M | Addis Abak Lower Tha     | 0 | 60  | N | Distinction |
| 583427 | F | South Regi Lower Tha     | 0 | 60  | N | Withdrawn   |
| 583714 | M | South Wes A Level or I   | 0 | 90  | N | Pass        |
| 583833 | M | Afar Regio Lower Tha     | 0 | 60  | N | Withdrawn   |
| 583839 | M | Afar Regio Lower Tha     | 0 | 60  | N | Fail        |
| 583844 | M | Sidamo Re Lower Tha      | 0 | 60  | N | Withdrawn   |
| 583855 | M | South Regi A Level or I  | 0 | 30  | N | Pass        |
| 583933 | M | Afar Regio Lower Tha     | 0 | 75  | N | Fail        |
| 584115 | M | Addis Abak Lower Tha     | 0 | 60  | N | Withdrawn   |
| 584191 | M | Somalia Re HE Qualific   | 0 | 60  | N | Pass        |
| 584386 | M | Somalia Re A Level or I  | 0 | 30  | N | Pass        |
| 584414 | M | Tigrai Regi A Level or I | 0 | 60  | N | Pass        |
| 584443 | F | Afar Regio Lower Tha     | 0 | 90  | Y | Distinction |
| 584444 | M | Amhara Re A Level or I   | 0 | 90  | N | Withdrawn   |
| 584514 | M | South Regi Lower Tha     | 0 | 90  | N | Withdrawn   |
| 584553 | M | Amhara Re A Level or I   | 0 | 30  | N | Pass        |
| 584567 | M | South Regi Lower Tha     | 0 | 60  | N | Fail        |
| 584913 | M | Amhara Re A Level or I   | 0 | 60  | N | Withdrawn   |
| 584923 | M | South Regi HE Qualific   | 0 | 60  | N | Withdrawn   |
| 585011 | M | Afar Regio HE Qualific   | 0 | 120 | N | Pass        |
| 585056 | M | Amhara Re A Level or I   | 0 | 60  | N | Withdrawn   |
| 585279 | M | South Regi A Level or I  | 0 | 60  | N | Distinction |
| 585433 | M | Afar Regio HE Qualific   | 0 | 60  | N | Pass        |

|        |   |                |              |   |     |   |             |
|--------|---|----------------|--------------|---|-----|---|-------------|
| 585455 | M | Afar Region    | A Level or I | 0 | 60  | N | Distinction |
| 585464 | M | South Region   | A Level or I | 0 | 60  | N | Pass        |
| 585471 | M | Sidamo Region  | A Level or I | 0 | 60  | N | Distinction |
| 585681 | M | Sidamo Region  | HE Qualific  | 0 | 60  | N | Withdrawn   |
| 585758 | M | Sidamo Region  | Lower Than   | 0 | 60  | N | Fail        |
| 585769 | F | Afar Region    | Post Gradu   | 0 | 90  | N | Withdrawn   |
| 585837 | M | Somalia Region | A Level or I | 0 | 60  | N | Pass        |
| 586046 | M | South Region   | HE Qualific  | 0 | 30  | N | Pass        |
| 586047 | M | South Region   | A Level or I | 0 | 30  | N | Pass        |
| 586060 | M | South Region   | Lower Than   | 0 | 60  | N | Fail        |
| 586132 | M | Addis Ababa    | A Level or I | 0 | 60  | N | Fail        |
| 586137 | M | North Region   | HE Qualific  | 0 | 30  | N | Pass        |
| 586236 | M | Addis Ababa    | A Level or I | 0 | 60  | N | Pass        |
| 586261 | M | Sidamo Region  | Lower Than   | 0 | 90  | N | Distinction |
| 586314 | M | Amhara Region  | A Level or I | 0 | 60  | N | Fail        |
| 586473 | M | Somalia Region | A Level or I | 0 | 60  | Y | Fail        |
| 586476 | F | Oromia Region  | A Level or I | 0 | 120 | N | Pass        |
| 586587 | M | Amhara Region  | Lower Than   | 0 | 60  | N | Withdrawn   |
| 586621 | M | South Region   | A Level or I | 0 | 60  | N | Pass        |
| 586668 | M | South Region   | A Level or I | 0 | 30  | N | Pass        |
| 586716 | M | Afar Region    | HE Qualific  | 0 | 90  | N | Pass        |
| 586750 | M | South West     | Lower Than   | 0 | 60  | N | Pass        |
| 586838 | M | Somalia Region | Lower Than   | 0 | 30  | N | Pass        |
| 586921 | M | Addis Ababa    | Lower Than   | 0 | 60  | N | Pass        |
| 586962 | M | South Region   | A Level or I | 0 | 90  | N | Pass        |
| 586979 | M | South Region   | A Level or I | 0 | 60  | N | Fail        |
| 587014 | M | South Region   | A Level or I | 0 | 30  | N | Fail        |
| 587122 | M | Afar Region    | Lower Than   | 0 | 90  | N | Withdrawn   |
| 587226 | M | Afar Region    | Lower Than   | 0 | 30  | Y | Fail        |
| 587319 | M | South Region   | A Level or I | 0 | 60  | N | Pass        |
| 587346 | M | Tigray Region  | A Level or I | 0 | 30  | N | Pass        |
| 587382 | M | North Region   | A Level or I | 0 | 60  | N | Fail        |
| 587547 | M | Sidamo Region  | A Level or I | 0 | 30  | N | Pass        |
| 587616 | M | Somalia Region | A Level or I | 0 | 60  | N | Pass        |
| 587621 | F | Sidamo Region  | Lower Than   | 0 | 60  | N | Fail        |
| 587677 | M | Addis Ababa    | Lower Than   | 0 | 60  | N | Withdrawn   |
| 587682 | M | South West     | Lower Than   | 0 | 60  | N | Pass        |
| 587714 | M | Addis Ababa    | A Level or I | 0 | 60  | N | Distinction |
| 587884 | M | South West     | Lower Than   | 0 | 60  | N | Withdrawn   |
| 587906 | M | Somalia Region | A Level or I | 0 | 60  | N | Distinction |
| 587911 | M | Amhara Region  | A Level or I | 0 | 60  | N | Distinction |
| 588125 | M | Sidamo Region  | Lower Than   | 0 | 60  | N | Pass        |
| 588231 | M | Sidamo Region  | Lower Than   | 0 | 60  | N | Pass        |
| 588280 | M | Oromia Region  | A Level or I | 0 | 60  | N | Distinction |
| 588383 | M | Tigray Region  | Lower Than   | 0 | 60  | N | Withdrawn   |
| 588402 | M | Tigray Region  | Lower Than   | 0 | 60  | N | Pass        |
| 588442 | M | Amhara Region  | Lower Than   | 0 | 90  | N | Pass        |

|        |   |                           |   |     |   |             |
|--------|---|---------------------------|---|-----|---|-------------|
| 588502 | M | Somalia Re Lower Tha      | 0 | 60  | N | Pass        |
| 588524 | M | Afar Region HE Qualific   | 0 | 60  | N | Distinction |
| 588583 | M | Sidamo Re HE Qualific     | 0 | 60  | N | Fail        |
| 588628 | M | South Wes A Level or I    | 0 | 60  | N | Distinction |
| 588676 | M | Afar Region HE Qualific   | 0 | 90  | N | Pass        |
| 588694 | M | North Regi Lower Tha      | 0 | 60  | N | Withdrawn   |
| 588706 | M | Sidamo Re Lower Tha       | 0 | 90  | N | Withdrawn   |
| 588710 | M | Amhara Re Lower Tha       | 0 | 60  | N | Pass        |
| 588835 | M | Afar Region Lower Tha     | 0 | 30  | N | Pass        |
| 588852 | M | Sidamo Re Lower Tha       | 0 | 90  | N | Withdrawn   |
| 588942 | M | South Regi HE Qualific    | 0 | 60  | N | Fail        |
| 588974 | M | South Regi Lower Tha      | 0 | 60  | N | Withdrawn   |
| 589018 | M | Afar Region Lower Tha     | 0 | 120 | N | Withdrawn   |
| 589023 | M | North Regi A Level or I   | 0 | 60  | N | Withdrawn   |
| 589055 | F | North Regi Lower Tha      | 0 | 60  | N | Fail        |
| 589211 | M | Afar Region A Level or I  | 0 | 120 | N | Pass        |
| 589327 | M | Afar Region HE Qualific   | 0 | 60  | N | Pass        |
| 589380 | M | Tigrai Region HE Qualific | 0 | 60  | N | Distinction |
| 589472 | M | Sidamo Re Lower Tha       | 0 | 90  | N | Withdrawn   |
| 589484 | M | Amhara Re Lower Tha       | 0 | 30  | N | Withdrawn   |
| 589506 | M | North Regi A Level or I   | 0 | 60  | N | Fail        |
| 589517 | F | South Regi A Level or I   | 0 | 60  | N | Withdrawn   |
| 589555 | M | Somalia Re A Level or I   | 0 | 90  | N | Withdrawn   |
| 589799 | M | Tigrai Region Lower Tha   | 0 | 30  | N | Fail        |
| 589856 | M | Addis Abak A Level or I   | 0 | 60  | N | Withdrawn   |
| 589894 | M | Afar Region A Level or I  | 0 | 60  | N | Pass        |
| 589902 | M | Oromia Re Lower Tha       | 0 | 60  | N | Pass        |
| 590017 | M | Addis Abak HE Qualific    | 0 | 30  | N | Distinction |
| 590072 | M | Afar Region A Level or I  | 0 | 90  | N | Fail        |
| 590436 | M | Amhara Re HE Qualific     | 0 | 60  | N | Withdrawn   |
| 590626 | M | Afar Region Lower Tha     | 0 | 60  | N | Pass        |
| 590744 | F | Afar Region HE Qualific   | 0 | 60  | N | Pass        |
| 590877 | M | Oromia Re Lower Tha       | 0 | 60  | N | Pass        |
| 590882 | M | South Regi Lower Tha      | 0 | 30  | N | Pass        |
| 590942 | M | Somalia Re A Level or I   | 0 | 60  | N | Withdrawn   |
| 590961 | M | Afar Region A Level or I  | 0 | 90  | N | Withdrawn   |
| 591021 | M | South Wes Lower Tha       | 0 | 60  | N | Distinction |
| 591165 | M | Afar Region Lower Tha     | 0 | 30  | N | Fail        |
| 591178 | M | Sidamo Re HE Qualific     | 0 | 30  | N | Withdrawn   |
| 591375 | M | Afar Region A Level or I  | 0 | 60  | N | Distinction |
| 591388 | M | South Regi HE Qualific    | 0 | 60  | N | Distinction |
| 591398 | M | South Regi A Level or I   | 0 | 60  | N | Withdrawn   |
| 591424 | M | Amhara Re HE Qualific     | 0 | 60  | N | Withdrawn   |
| 591566 | M | Amhara Re Lower Tha       | 0 | 60  | N | Pass        |
| 591719 | M | South Regi A Level or I   | 0 | 60  | N | Withdrawn   |
| 591869 | M | North Regi HE Qualific    | 0 | 30  | N | Pass        |
| 591942 | M | Sidamo Re Lower Tha       | 0 | 60  | N | Pass        |

|        |   |                          |   |     |   |             |
|--------|---|--------------------------|---|-----|---|-------------|
| 591944 | M | North Regi Lower Tha     | 0 | 90  | N | Fail        |
| 591958 | M | South Regi Lower Tha     | 0 | 60  | N | Distinction |
| 591995 | M | Afar Regio A Level or I  | 0 | 30  | N | Pass        |
| 592003 | M | South Wes A Level or I   | 0 | 60  | N | Pass        |
| 592051 | M | Afar Regio HE Qualific   | 0 | 120 | Y | Pass        |
| 592172 | M | Amhara Re Lower Tha      | 0 | 90  | N | Fail        |
| 592250 | M | Afar Regio HE Qualific   | 0 | 30  | N | Pass        |
| 592581 | F | Amhara Re Lower Tha      | 0 | 30  | N | Withdrawn   |
| 592609 | M | Afar Regio A Level or I  | 0 | 60  | N | Distinction |
| 592787 | M | Somalia Re Lower Tha     | 0 | 30  | N | Pass        |
| 592791 | M | Somalia Re HE Qualific   | 0 | 30  | N | Fail        |
| 592842 | M | Afar Regio HE Qualific   | 0 | 120 | N | Fail        |
| 592895 | F | North Regi Post Gradu    | 0 | 30  | N | Distinction |
| 592961 | M | Amhara Re HE Qualific    | 0 | 60  | N | Distinction |
| 592997 | M | Sidamo Re HE Qualific    | 0 | 60  | N | Pass        |
| 593348 | M | North Regi Post Gradu    | 0 | 60  | N | Withdrawn   |
| 593362 | M | Afar Regio Lower Tha     | 0 | 60  | N | Withdrawn   |
| 593400 | M | Addis Abak A Level or I  | 0 | 60  | N | Fail        |
| 593487 | M | Afar Regio HE Qualific   | 0 | 60  | N | Pass        |
| 593534 | M | Addis Abak Lower Tha     | 0 | 60  | N | Pass        |
| 593587 | M | Somalia Re A Level or I  | 0 | 60  | N | Pass        |
| 593787 | M | Sidamo Re Lower Tha      | 0 | 60  | N | Fail        |
| 593845 | M | Amhara Re Lower Tha      | 0 | 60  | N | Fail        |
| 593924 | M | Sidamo Re A Level or I   | 0 | 60  | N | Distinction |
| 594111 | M | Tigrai Regi A Level or I | 0 | 60  | N | Pass        |
| 594157 | M | South Regi A Level or I  | 0 | 60  | N | Pass        |
| 594199 | M | Oromia Re A Level or I   | 0 | 90  | Y | Pass        |
| 594233 | M | North Regi A Level or I  | 0 | 90  | N | Fail        |
| 594246 | M | Afar Regio HE Qualific   | 0 | 60  | N | Fail        |
| 594399 | M | Afar Regio Lower Tha     | 0 | 30  | N | Pass        |
| 594431 | F | Somalia Re A Level or I  | 0 | 60  | N | Pass        |
| 594452 | M | Afar Regio HE Qualific   | 0 | 60  | N | Fail        |
| 594458 | M | Amhara Re Lower Tha      | 0 | 60  | N | Fail        |
| 594517 | M | South Wes A Level or I   | 0 | 60  | N | Pass        |
| 594602 | M | Addis Abak Lower Tha     | 0 | 90  | N | Fail        |
| 594755 | M | North Regi Lower Tha     | 0 | 120 | N | Withdrawn   |
| 594851 | M | Afar Regio Lower Tha     | 0 | 90  | N | Fail        |
| 594864 | M | Sidamo Re Lower Tha      | 0 | 30  | N | Fail        |
| 594976 | M | Afar Regio HE Qualific   | 0 | 30  | N | Pass        |
| 595077 | M | South Wes HE Qualific    | 0 | 60  | N | Withdrawn   |
| 595100 | M | Afar Regio Post Gradu    | 0 | 60  | N | Withdrawn   |
| 595182 | M | Afar Regio HE Qualific   | 0 | 90  | N | Distinction |
| 595189 | M | Afar Regio A Level or I  | 0 | 60  | N | Distinction |
| 595244 | M | Somalia Re A Level or I  | 0 | 90  | N | Pass        |
| 595362 | M | Amhara Re A Level or I   | 0 | 60  | N | Withdrawn   |
| 595453 | M | Sidamo Re Lower Tha      | 0 | 30  | N | Withdrawn   |
| 595492 | M | Oromia Re Lower Tha      | 0 | 60  | N | Pass        |

|        |   |             |              |   |     |   |             |
|--------|---|-------------|--------------|---|-----|---|-------------|
| 595515 | M | Tigrai Regi | A Level or I | 0 | 30  | N | Fail        |
| 595553 | M | North Regi  | HE Qualific  | 0 | 30  | N | Pass        |
| 595781 | F | North Regi  | A Level or I | 0 | 60  | N | Pass        |
| 595938 | M | Somalia Re  | HE Qualific  | 0 | 30  | N | Pass        |
| 595990 | F | Sidamo Re   | Lower Thar   | 0 | 30  | N | Withdrawn   |
| 596002 | M | Addis Abat  | A Level or I | 0 | 30  | N | Withdrawn   |
| 596137 | M | Addis Abat  | Lower Thar   | 0 | 30  | N | Withdrawn   |
| 596319 | M | North Regi  | Post Gradu   | 0 | 60  | N | Pass        |
| 596321 | F | Amhara Re   | A Level or I | 0 | 60  | N | Withdrawn   |
| 596361 | M | North Regi  | Lower Thar   | 0 | 90  | N | Distinction |
| 596404 | M | Sidamo Re   | Lower Thar   | 0 | 90  | N | Fail        |
| 596432 | F | Oromia Re   | Lower Thar   | 0 | 60  | N | Withdrawn   |
| 596526 | M | Amhara Re   | HE Qualific  | 0 | 60  | N | Pass        |
| 596614 | M | South Regi  | Lower Thar   | 0 | 30  | N | Withdrawn   |
| 596676 | M | Sidamo Re   | A Level or I | 0 | 60  | N | Withdrawn   |
| 596789 | M | Tigrai Regi | A Level or I | 0 | 30  | N | Pass        |
| 596812 | F | Oromia Re   | Lower Thar   | 0 | 60  | N | Pass        |
| 596931 | M | South Regi  | HE Qualific  | 0 | 60  | N | Fail        |
| 597181 | M | South Regi  | A Level or I | 0 | 60  | N | Fail        |
| 597206 | M | Somalia Re  | A Level or I | 0 | 60  | N | Pass        |
| 597319 | M | South Wes   | Lower Thar   | 0 | 60  | N | Pass        |
| 597335 | F | Addis Abat  | A Level or I | 0 | 60  | N | Pass        |
| 597363 | M | Oromia Re   | Lower Thar   | 0 | 60  | N | Pass        |
| 597376 | F | South Regi  | A Level or I | 0 | 120 | Y | Pass        |
| 597459 | M | Sidamo Re   | HE Qualific  | 0 | 60  | N | Pass        |
| 597573 | M | Sidamo Re   | A Level or I | 0 | 60  | Y | Pass        |
| 597948 | M | South Wes   | HE Qualific  | 0 | 30  | N | Pass        |
| 598028 | M | Sidamo Re   | HE Qualific  | 0 | 60  | N | Pass        |
| 598074 | M | Afar Regio  | A Level or I | 0 | 90  | N | Distinction |
| 598321 | M | South Regi  | HE Qualific  | 0 | 60  | N | Pass        |
| 598547 | M | Tigrai Regi | Lower Thar   | 0 | 30  | N | Fail        |
| 598662 | F | Afar Regio  | A Level or I | 0 | 60  | N | Pass        |
| 598809 | M | South Regi  | Lower Thar   | 0 | 30  | N | Fail        |
| 598819 | M | Addis Abat  | HE Qualific  | 0 | 60  | N | Fail        |
| 598821 | M | South Regi  | A Level or I | 0 | 60  | N | Withdrawn   |
| 598924 | M | North Regi  | A Level or I | 0 | 60  | N | Fail        |
| 598963 | M | Amhara Re   | HE Qualific  | 0 | 30  | N | Distinction |
| 598973 | M | Addis Abat  | A Level or I | 0 | 60  | Y | Distinction |
| 599176 | M | Tigrai Regi | HE Qualific  | 0 | 30  | N | Pass        |
| 599263 | M | Sidamo Re   | A Level or I | 0 | 120 | N | Withdrawn   |
| 599284 | M | Tigrai Regi | Lower Thar   | 0 | 30  | N | Fail        |
| 599452 | M | North Regi  | HE Qualific  | 0 | 60  | N | Pass        |
| 599478 | F | North Regi  | A Level or I | 0 | 60  | N | Pass        |
| 599479 | M | North Regi  | A Level or I | 0 | 60  | N | Pass        |
| 599520 | M | Amhara Re   | A Level or I | 0 | 60  | N | Withdrawn   |
| 599542 | M | Afar Regio  | Lower Thar   | 0 | 90  | N | Fail        |
| 599547 | M | Somalia Re  | A Level or I | 0 | 120 | Y | Withdrawn   |

|        |   |             |              |   |     |   |             |
|--------|---|-------------|--------------|---|-----|---|-------------|
| 599588 | M | Tigrai Regi | A Level or l | 0 | 90  | N | Fail        |
| 599768 | M | Tigrai Regi | Lower Than   | 0 | 60  | N | Pass        |
| 599893 | M | South Regi  | A Level or l | 0 | 60  | N | Fail        |
| 599902 | M | South Regi  | Lower Than   | 0 | 60  | N | Pass        |
| 599942 | M | Tigrai Regi | A Level or l | 0 | 60  | N | Withdrawn   |
| 599958 | F | Oromia Re   | HE Qualific  | 0 | 150 | N | Distinction |
| 599982 | M | South Regi  | A Level or l | 0 | 60  | N | Withdrawn   |
| 600071 | M | North Regi  | Post Gradu   | 0 | 60  | N | Pass        |
| 600077 | M | Afar Regio  | Lower Than   | 0 | 30  | N | Fail        |
| 600127 | M | Tigrai Regi | A Level or l | 0 | 60  | N | Fail        |
| 600142 | M | Tigrai Regi | A Level or l | 0 | 60  | N | Pass        |
| 600187 | M | Oromia Re   | A Level or l | 0 | 60  | N | Distinction |
| 600198 | M | South Wes   | A Level or l | 0 | 60  | N | Pass        |
| 600335 | M | Sidamo Re   | A Level or l | 0 | 60  | N | Pass        |
| 600350 | M | South Wes   | A Level or l | 0 | 60  | N | Pass        |
| 600509 | M | Amhara Re   | A Level or l | 0 | 60  | N | Pass        |
| 600547 | M | Amhara Re   | A Level or l | 0 | 60  | N | Pass        |
| 600623 | M | South Wes   | A Level or l | 0 | 90  | N | Withdrawn   |
| 600816 | M | South Wes   | A Level or l | 0 | 30  | N | Withdrawn   |
| 600869 | M | South Regi  | Lower Than   | 0 | 60  | N | Pass        |
| 600916 | M | Afar Regio  | Lower Than   | 0 | 30  | N | Fail        |
| 600938 | M | Afar Regio  | HE Qualific  | 0 | 90  | N | Pass        |
| 600945 | M | Afar Regio  | A Level or l | 0 | 60  | N | Pass        |
| 600978 | M | Addis Aba   | Lower Than   | 0 | 90  | N | Withdrawn   |
| 601054 | M | Sidamo Re   | A Level or l | 0 | 120 | N | Withdrawn   |
| 601157 | M | South Regi  | Lower Than   | 0 | 60  | N | Withdrawn   |
| 601175 | M | South Wes   | A Level or l | 0 | 60  | N | Pass        |
| 601182 | M | Afar Regio  | Lower Than   | 0 | 60  | N | Pass        |
| 601223 | M | Tigrai Regi | Lower Than   | 0 | 60  | N | Withdrawn   |
| 601224 | M | Afar Regio  | HE Qualific  | 0 | 90  | N | Pass        |
| 601248 | M | Tigrai Regi | Lower Than   | 0 | 90  | N | Withdrawn   |
| 601370 | F | Sidamo Re   | A Level or l | 0 | 60  | N | Withdrawn   |
| 601407 | M | Sidamo Re   | Lower Than   | 0 | 30  | N | Withdrawn   |
| 601433 | M | South Wes   | Lower Than   | 0 | 60  | N | Fail        |
| 601653 | M | North Regi  | HE Qualific  | 0 | 60  | N | Pass        |
| 601757 | M | Afar Regio  | HE Qualific  | 0 | 90  | N | Distinction |
| 601827 | M | North Regi  | A Level or l | 0 | 30  | N | Withdrawn   |
| 601873 | M | South Regi  | HE Qualific  | 0 | 30  | N | Pass        |
| 602007 | M | South Wes   | Post Gradu   | 0 | 60  | N | Pass        |
| 602037 | M | Oromia Re   | Lower Than   | 0 | 30  | N | Withdrawn   |
| 602133 | M | South Wes   | A Level or l | 0 | 60  | N | Pass        |
| 602233 | M | South Regi  | HE Qualific  | 0 | 60  | N | Pass        |
| 602244 | M | Afar Regio  | HE Qualific  | 0 | 60  | N | Fail        |
| 602268 | M | Sidamo Re   | A Level or l | 0 | 60  | N | Distinction |
| 602269 | M | Sidamo Re   | HE Qualific  | 0 | 60  | N | Pass        |
| 602275 | M | Addis Aba   | A Level or l | 0 | 60  | N | Pass        |
| 602288 | M | South Regi  | A Level or l | 0 | 60  | N | Pass        |

|        |   |                          |   |     |   |             |
|--------|---|--------------------------|---|-----|---|-------------|
| 602389 | F | Sidamo Re A Level or I   | 0 | 60  | N | Fail        |
| 602398 | M | South Regi A Level or I  | 0 | 60  | N | Fail        |
| 602424 | M | Addis Abak Lower Than    | 0 | 60  | N | Pass        |
| 602659 | M | Afar Regioi A Level or I | 0 | 60  | N | Withdrawn   |
| 602663 | M | Tigrai Regi Lower Than   | 0 | 60  | N | Distinction |
| 602703 | M | Oromia Re A Level or I   | 0 | 60  | N | Pass        |
| 602718 | M | Afar Regioi Post Gradu   | 0 | 60  | N | Pass        |
| 602816 | M | Sidamo Re A Level or I   | 0 | 60  | N | Fail        |
| 602827 | M | South Regi Lower Than    | 0 | 60  | N | Pass        |
| 602944 | M | Amhara Re A Level or I   | 0 | 60  | Y | Fail        |
| 603053 | M | Afar Regioi A Level or I | 0 | 90  | N | Fail        |
| 603222 | M | South Regi Lower Than    | 0 | 60  | N | Pass        |
| 603309 | M | South Wes A Level or I   | 0 | 60  | N | Pass        |
| 603357 | M | South Regi Lower Than    | 0 | 90  | N | Withdrawn   |
| 603455 | M | South Wes Lower Than     | 0 | 60  | N | Pass        |
| 603477 | M | Addis Abak HE Qualific   | 0 | 60  | N | Pass        |
| 603503 | M | Sidamo Re A Level or I   | 0 | 30  | N | Distinction |
| 603565 | M | South Regi Lower Than    | 0 | 60  | N | Withdrawn   |
| 603639 | M | Amhara Re A Level or I   | 0 | 60  | N | Distinction |
| 604050 | M | North Regi A Level or I  | 0 | 60  | N | Pass        |
| 604378 | F | North Regi HE Qualific   | 0 | 30  | N | Pass        |
| 604393 | M | South Regi A Level or I  | 0 | 60  | N | Pass        |
| 604517 | M | Afar Regioi Lower Than   | 0 | 60  | N | Pass        |
| 604685 | M | Addis Abak A Level or I  | 0 | 60  | N | Pass        |
| 604875 | M | Tigrai Regi A Level or I | 0 | 30  | N | Withdrawn   |
| 604906 | M | South Regi Lower Than    | 0 | 60  | N | Pass        |
| 605111 | M | Oromia Re Lower Than     | 0 | 60  | N | Pass        |
| 605180 | M | North Regi A Level or I  | 0 | 60  | N | Withdrawn   |
| 605262 | M | Afar Regioi A Level or I | 0 | 60  | N | Withdrawn   |
| 605264 | M | South Regi Lower Than    | 0 | 30  | N | Pass        |
| 605361 | M | Sidamo Re Lower Than     | 0 | 60  | N | Distinction |
| 605480 | M | North Regi Lower Than    | 0 | 60  | N | Withdrawn   |
| 605545 | M | Oromia Re Post Gradu     | 0 | 60  | N | Withdrawn   |
| 605587 | M | South Regi A Level or I  | 0 | 60  | N | Withdrawn   |
| 605908 | M | Amhara Re A Level or I   | 0 | 60  | N | Withdrawn   |
| 605926 | M | Addis Abak A Level or I  | 0 | 60  | N | Withdrawn   |
| 606047 | F | South Regi A Level or I  | 0 | 60  | N | Distinction |
| 606190 | M | Somalia Re Lower Than    | 0 | 60  | N | Withdrawn   |
| 606206 | M | Afar Regioi A Level or I | 0 | 60  | N | Distinction |
| 606303 | M | North Regi A Level or I  | 0 | 60  | N | Withdrawn   |
| 606373 | M | Oromia Re HE Qualific    | 0 | 30  | N | Pass        |
| 606606 | M | Afar Regioi A Level or I | 0 | 30  | N | Fail        |
| 606724 | M | Addis Abak A Level or I  | 0 | 60  | N | Pass        |
| 606743 | M | Sidamo Re Lower Than     | 0 | 120 | N | Pass        |
| 606918 | M | South Regi A Level or I  | 0 | 60  | N | Distinction |
| 607060 | F | South Regi A Level or I  | 0 | 60  | N | Fail        |
| 607085 | M | Afar Regioi A Level or I | 0 | 30  | N | Pass        |

|        |   |                           |   |     |   |             |
|--------|---|---------------------------|---|-----|---|-------------|
| 607143 | M | Afar Region Lower Than    | 0 | 30  | N | Pass        |
| 607178 | M | Addis Ababa HE Qualific   | 0 | 60  | N | Pass        |
| 607442 | M | North Region Lower Than   | 0 | 60  | N | Withdrawn   |
| 607600 | M | South Region Lower Than   | 0 | 30  | N | Pass        |
| 607609 | M | Sidamo Region Lower Than  | 0 | 90  | N | Withdrawn   |
| 607636 | M | Tigray Region A Level or  | 0 | 60  | N | Pass        |
| 607814 | F | Somalia Region A Level or | 0 | 60  | N | Fail        |
| 607835 | M | South Region A Level or   | 0 | 60  | N | Pass        |
| 607883 | M | Amhara Region Lower Than  | 0 | 60  | N | Withdrawn   |
| 607947 | M | Amhara Region A Level or  | 0 | 30  | N | Distinction |
| 608024 | F | South West HE Qualific    | 0 | 120 | N | Pass        |
| 608130 | M | South West Lower Than     | 0 | 60  | N | Pass        |
| 608243 | M | South Region A Level or   | 0 | 60  | N | Distinction |
| 608459 | M | North Region Lower Than   | 0 | 90  | N | Withdrawn   |
| 608472 | M | Amhara Region Lower Than  | 0 | 60  | N | Pass        |
| 608504 | M | Amhara Region A Level or  | 0 | 60  | N | Pass        |
| 608591 | M | North Region Lower Than   | 0 | 30  | N | Withdrawn   |
| 608669 | M | Afar Region A Level or    | 0 | 30  | N | Fail        |
| 608744 | M | North Region A Level or   | 0 | 30  | Y | Pass        |
| 608884 | M | Addis Ababa Lower Than    | 0 | 60  | N | Pass        |
| 608967 | M | South Region Lower Than   | 0 | 60  | Y | Fail        |
| 609025 | M | Sidamo Region Lower Than  | 0 | 60  | N | Pass        |
| 609192 | M | Afar Region Lower Than    | 0 | 60  | N | Pass        |
| 609490 | M | Sidamo Region Lower Than  | 0 | 30  | N | Withdrawn   |
| 609527 | M | Oromia Region HE Qualific | 0 | 30  | N | Distinction |
| 609583 | M | Tigray Region A Level or  | 0 | 90  | N | Withdrawn   |
| 609682 | M | Amhara Region HE Qualific | 0 | 60  | N | Pass        |
| 609748 | M | South Region Lower Than   | 0 | 30  | N | Withdrawn   |
| 610025 | M | Afar Region HE Qualific   | 0 | 60  | N | Pass        |
| 610143 | M | South Region A Level or   | 0 | 30  | N | Fail        |
| 610158 | M | Addis Ababa Lower Than    | 0 | 60  | N | Pass        |
| 610188 | M | Amhara Region A Level or  | 0 | 120 | N | Pass        |
| 610453 | M | South West Lower Than     | 0 | 60  | N | Pass        |
| 610503 | M | South Region A Level or   | 0 | 60  | N | Pass        |
| 610549 | M | Amhara Region A Level or  | 0 | 60  | N | Pass        |
| 610575 | M | South Region HE Qualific  | 0 | 60  | N | Pass        |
| 610695 | M | South Region Lower Than   | 0 | 60  | N | Withdrawn   |
| 610855 | M | Somalia Region Lower Than | 0 | 150 | N | Pass        |
| 610873 | M | Somalia Region Lower Than | 0 | 60  | N | Pass        |
| 610888 | M | South West Lower Than     | 0 | 30  | N | Fail        |
| 610979 | M | South Region A Level or   | 0 | 30  | N | Fail        |
| 611033 | M | North Region Post Gradu   | 0 | 30  | N | Distinction |
| 611049 | M | North Region A Level or   | 0 | 60  | N | Distinction |
| 611062 | M | South West A Level or     | 0 | 60  | N | Fail        |
| 611202 | M | Afar Region A Level or    | 0 | 30  | N | Distinction |
| 611206 | M | Tigray Region Lower Than  | 0 | 30  | N | Fail        |
| 611255 | M | South West A Level or     | 0 | 60  | N | Pass        |



|         |   |                          |   |     |   |             |
|---------|---|--------------------------|---|-----|---|-------------|
| 611344  | M | South Regi Lower Tha     | 0 | 60  | N | Pass        |
| 611402  | M | South Regi HE Qualific   | 0 | 60  | N | Pass        |
| 611405  | M | South Regi Lower Tha     | 0 | 60  | N | Withdrawn   |
| 611561  | F | Afar Regioi A Level or I | 0 | 30  | N | Fail        |
| 611564  | M | Afar Regioi A Level or I | 0 | 30  | N | Pass        |
| 611565  | F | Afar Regioi A Level or I | 0 | 30  | Y | Withdrawn   |
| 611639  | F | Afar Regioi A Level or I | 0 | 30  | N | Fail        |
| 612048  | M | Afar Regioi A Level or I | 0 | 30  | N | Pass        |
| 612177  | M | Afar Regioi HE Qualific  | 0 | 60  | N | Distinction |
| 612183  | M | Afar Regioi A Level or I | 0 | 60  | N | Distinction |
| 612187  | M | Afar Regioi HE Qualific  | 0 | 60  | N | Distinction |
| 612191  | M | Afar Regioi Lower Tha    | 0 | 30  | N | Fail        |
| 612199  | M | Afar Regioi HE Qualific  | 0 | 30  | N | Withdrawn   |
| 943374  | M | Afar Regioi Lower Tha    | 0 | 30  | N | Pass        |
| 965763  | M | Amhara Re A Level or I   | 0 | 90  | N | Pass        |
| 991843  | F | Afar Regioi A Level or I | 0 | 30  | N | Distinction |
| 1053702 | M | Afar Regioi HE Qualific  | 0 | 90  | N | Distinction |
| 1073766 | M | Somalia Re HE Qualific   | 0 | 60  | N | Pass        |
| 1400592 | M | Afar Regioi A Level or I | 0 | 90  | N | Withdrawn   |
| 1487084 | M | Oromia Re HE Qualific    | 0 | 180 | N | Pass        |
| 1529371 | M | North Regi HE Qualific   | 0 | 60  | N | Fail        |
| 1541906 | M | South Regi Lower Tha     | 0 | 60  | N | Fail        |
| 1561750 | F | Afar Regioi Lower Tha    | 0 | 60  | N | Pass        |
| 1567505 | M | Addis Abat A Level or I  | 0 | 120 | N | Pass        |
| 1622944 | M | Afar Regioi A Level or I | 0 | 30  | Y | Fail        |
| 1638548 | M | Afar Regioi A Level or I | 0 | 130 | N | Pass        |
| 1667346 | M | Sidamo Re HE Qualific    | 0 | 150 | N | Pass        |
| 1725109 | M | Tigrai Regi HE Qualific  | 0 | 90  | N | Distinction |
| 1762336 | M | Somalia Re A Level or I  | 0 | 90  | N | Fail        |
| 1781834 | M | South Wes HE Qualific    | 0 | 115 | N | Pass        |
| 1837015 | M | Sidamo Re Lower Tha      | 0 | 30  | N | Fail        |
| 1850818 | M | South Wes A Level or I   | 0 | 30  | N | Pass        |
| 1861793 | M | South Regi Lower Tha     | 0 | 30  | N | Distinction |
| 1896088 | M | South Regi A Level or I  | 0 | 60  | N | Withdrawn   |
| 1902240 | M | South Regi A Level or I  | 0 | 60  | N | Distinction |
| 1915408 | M | Afar Regioi HE Qualific  | 0 | 30  | Y | Pass        |
| 1924641 | M | Afar Regioi HE Qualific  | 0 | 120 | N | Pass        |
| 1930644 | M | Afar Regioi Lower Tha    | 0 | 90  | N | Pass        |
| 1951925 | M | Sidamo Re A Level or I   | 0 | 60  | N | Fail        |
| 1954230 | M | Amhara Re A Level or I   | 0 | 30  | N | Pass        |
| 1976350 | M | Tigrai Regi A Level or I | 0 | 30  | N | Pass        |
| 1991903 | F | Sidamo Re A Level or I   | 0 | 30  | N | Pass        |
| 1993955 | M | South Wes HE Qualific    | 0 | 60  | N | Pass        |
| 1994610 | F | North Regi HE Qualific   | 0 | 30  | N | Withdrawn   |
| 1995239 | M | North Regi Lower Tha     | 0 | 60  | N | Fail        |
| 1995532 | M | South Wes Post Gradu     | 0 | 60  | N | Distinction |
| 2028474 | M | South Regi A Level or I  | 0 | 165 | N | Fail        |

|         |   |                         |   |     |   |             |
|---------|---|-------------------------|---|-----|---|-------------|
| 2033951 | M | South Regi A Level or I | 0 | 30  | N | Distinction |
| 2046324 | F | Afar Regio HE Qualific  | 0 | 30  | N | Fail        |
| 2056643 | M | Afar Regio A Level or I | 0 | 60  | Y | Pass        |
| 2080916 | M | Afar Regio HE Qualific  | 0 | 90  | N | Withdrawn   |
| 2094849 | M | Somalia Re A Level or I | 0 | 60  | N | Withdrawn   |
| 2109119 | M | Addis Abak HE Qualific  | 0 | 60  | N | Distinction |
| 2115680 | M | Amhara Re Lower Thar    | 0 | 60  | N | Withdrawn   |
| 2128283 | M | Oromia Re HE Qualific   | 0 | 90  | N | Withdrawn   |
| 2134237 | M | North Regi HE Qualific  | 0 | 90  | N | Pass        |
| 2134304 | M | Afar Regio Lower Thar   | 0 | 60  | N | Pass        |
| 2137413 | M | Amhara Re Lower Thar    | 0 | 30  | N | Fail        |
| 2138146 | M | Tigrai Regi Lower Thar  | 0 | 30  | N | Pass        |
| 2171834 | M | Afar Regio HE Qualific  | 0 | 120 | N | Pass        |
| 2187588 | M | South Wes A Level or I  | 0 | 60  | N | Withdrawn   |
| 2198356 | M | Sidamo Re Lower Thar    | 0 | 60  | N | Withdrawn   |
| 2199455 | M | South Regi A Level or I | 0 | 30  | N | Pass        |
| 2252437 | M | Amhara Re Lower Thar    | 0 | 60  | N | Pass        |
| 2255516 | M | South Regi Lower Thar   | 0 | 95  | N | Distinction |
| 2274938 | M | Addis Abak HE Qualific  | 0 | 30  | N | Fail        |
| 2326597 | F | Sidamo Re A Level or I  | 0 | 90  | Y | Pass        |
| 2331750 | M | Afar Regio Lower Thar   | 0 | 30  | N | Pass        |
| 2384615 | M | Afar Regio A Level or I | 0 | 150 | N | Withdrawn   |
| 2389754 | M | North Regi HE Qualific  | 0 | 60  | N | Pass        |
| 2408307 | M | South Wes A Level or I  | 0 | 90  | N | Distinction |
| 2418732 | F | North Regi HE Qualific  | 0 | 60  | N | Distinction |
| 2435050 | F | Amhara Re Lower Thar    | 0 | 90  | Y | Withdrawn   |
| 2435726 | F | Afar Regio HE Qualific  | 0 | 60  | N | Pass        |
| 2451726 | F | North Regi Lower Thar   | 0 | 60  | N | Pass        |
| 2474006 | M | South Wes HE Qualific   | 0 | 150 | N | Pass        |
| 2474995 | M | North Regi HE Qualific  | 0 | 30  | N | Pass        |
| 2485655 | M | Addis Abak HE Qualific  | 0 | 30  | N | Distinction |
| 2487990 | M | North Regi Post Gradu   | 0 | 90  | N | Pass        |
| 2505299 | M | Afar Regio A Level or I | 0 | 60  | N | Pass        |
| 2513333 | M | Addis Abak A Level or I | 0 | 60  | N | Fail        |
| 2518880 | M | Afar Regio HE Qualific  | 0 | 60  | N | Fail        |
| 2537898 | M | South Regi Lower Thar   | 0 | 30  | N | Pass        |
| 2541992 | M | Tigrai Regi Lower Thar  | 0 | 60  | N | Withdrawn   |
| 2542645 | M | South Wes A Level or I  | 0 | 30  | N | Fail        |
| 2562704 | M | Afar Regio A Level or I | 0 | 30  | N | Withdrawn   |
| 2564333 | M | Amhara Re A Level or I  | 0 | 60  | Y | Pass        |
| 2569834 | F | Addis Abak A Level or I | 0 | 60  | N | Pass        |
| 2574909 | M | Tigrai Regi HE Qualific | 0 | 90  | N | Pass        |
| 2588201 | M | South Regi Lower Thar   | 0 | 60  | N | Pass        |
| 2590189 | M | Tigrai Regi HE Qualific | 0 | 30  | N | Pass        |
| 2598509 | M | Sidamo Re Lower Thar    | 0 | 60  | N | Pass        |
| 2598961 | M | Addis Abak HE Qualific  | 0 | 30  | N | Distinction |
| 2604856 | M | South Regi Lower Thar   | 0 | 90  | N | Fail        |

|         |   |                          |   |     |   |             |
|---------|---|--------------------------|---|-----|---|-------------|
| 2607824 | M | South Regi Lower Tha     | 0 | 60  | N | Pass        |
| 2608828 | M | Oromia Re HE Qualific    | 0 | 55  | N | Pass        |
| 2610857 | M | Sidamo Re Lower Tha      | 0 | 120 | N | Withdrawn   |
| 2614546 | M | Sidamo Re HE Qualific    | 0 | 30  | N | Withdrawn   |
| 2615849 | M | South Regi Lower Tha     | 0 | 90  | N | Pass        |
| 2616950 | M | North Regi A Level or I  | 0 | 60  | N | Pass        |
| 2617635 | M | South Regi A Level or I  | 0 | 60  | N | Pass        |
| 2619025 | M | South Regi A Level or I  | 0 | 90  | Y | Distinction |
| 2623263 | M | South Regi A Level or I  | 0 | 60  | N | Distinction |
| 2623960 | M | Afar Regio HE Qualific   | 0 | 120 | N | Withdrawn   |
| 2625693 | M | North Regi A Level or I  | 0 | 60  | N | Pass        |
| 2634238 | M | Sidamo Re Lower Tha      | 0 | 60  | N | Fail        |
| 2641254 | M | Addis Abak Lower Tha     | 0 | 60  | N | Pass        |
| 2641364 | M | Somalia Re A Level or I  | 0 | 60  | N | Pass        |
| 2657915 | M | Sidamo Re Lower Tha      | 0 | 60  | N | Distinction |
| 2670012 | M | North Regi A Level or I  | 0 | 90  | N | Withdrawn   |
| 2681277 | M | Sidamo Re HE Qualific    | 0 | 170 | N | Withdrawn   |
| 2698535 | M | Tigrai Regi Lower Tha    | 0 | 60  | N | Pass        |
| 25150   | M | Amhara Re HE Qualific    | 0 | 60  | N | Pass        |
| 27780   | M | Tigrai Regi A Level or I | 0 | 150 | N | Pass        |
| 29639   | M | North Regi Lower Tha     | 0 | 30  | N | Pass        |
| 29820   | M | Addis Abak HE Qualific   | 0 | 60  | N | Pass        |
| 35340   | M | South Regi A Level or I  | 0 | 60  | N | Pass        |
| 35508   | M | South Wes A Level or I   | 0 | 30  | N | Distinction |
| 64296   | M | Afar Regio HE Qualific   | 0 | 60  | N | Fail        |
| 69239   | F | Somalia Re Lower Tha     | 0 | 90  | Y | Withdrawn   |
| 70537   | M | Sidamo Re Lower Tha      | 0 | 120 | N | Pass        |
| 83219   | F | South Regi A Level or I  | 0 | 60  | N | Pass        |
| 97486   | M | Amhara Re HE Qualific    | 0 | 60  | N | Withdrawn   |
| 121574  | F | Addis Abak A Level or I  | 0 | 30  | N | Fail        |
| 128971  | M | Somalia Re HE Qualific   | 0 | 30  | N | Pass        |
| 135330  | M | Afar Regio HE Qualific   | 0 | 60  | N | Fail        |
| 144745  | F | Sidamo Re HE Qualific    | 0 | 30  | Y | Pass        |
| 148282  | M | Amhara Re HE Qualific    | 0 | 30  | N | Fail        |
| 156594  | M | South Regi Post Gradu    | 0 | 30  | N | Pass        |
| 158831  | M | Sidamo Re A Level or I   | 0 | 60  | N | Pass        |
| 165376  | F | Sidamo Re A Level or I   | 0 | 120 | N | Pass        |
| 167791  | M | Amhara Re A Level or I   | 0 | 60  | N | Distinction |
| 170936  | M | Amhara Re HE Qualific    | 0 | 60  | N | Pass        |
| 171334  | M | South Wes A Level or I   | 0 | 60  | N | Withdrawn   |
| 174512  | M | South Regi Lower Tha     | 0 | 60  | N | Withdrawn   |
| 182400  | M | North Regi HE Qualific   | 0 | 30  | N | Fail        |
| 185057  | M | South Wes HE Qualific    | 0 | 30  | N | Pass        |
| 186476  | M | Amhara Re A Level or I   | 0 | 30  | N | Pass        |
| 188260  | M | Tigrai Regi A Level or I | 0 | 120 | N | Pass        |
| 188662  | M | Afar Regio HE Qualific   | 0 | 30  | N | Pass        |
| 193163  | M | Afar Regio HE Qualific   | 0 | 90  | N | Fail        |

|        |   |                          |   |     |   |             |
|--------|---|--------------------------|---|-----|---|-------------|
| 197730 | M | Afar Region HE Qualific  | 1 | 100 | N | Pass        |
| 198902 | M | Sidamo Re Lower Than     | 0 | 60  | N | Fail        |
| 231019 | M | South Wes Lower Than     | 0 | 30  | N | Fail        |
| 231339 | F | Afar Region Post Gradu   | 0 | 60  | N | Distinction |
| 234559 | M | Afar Region HE Qualific  | 0 | 60  | N | Pass        |
| 237934 | M | Afar Region HE Qualific  | 0 | 60  | N | Fail        |
| 244166 | M | South Regi A Level or I  | 0 | 30  | N | Fail        |
| 244977 | M | Addis Abak A Level or I  | 0 | 60  | N | Distinction |
| 247819 | M | Oromia Re Lower Than     | 0 | 60  | N | Pass        |
| 248818 | M | South Wes Lower Than     | 0 | 30  | N | Pass        |
| 250092 | M | Amhara Re A Level or I   | 0 | 60  | N | Fail        |
| 256867 | M | Sidamo Re A Level or I   | 0 | 30  | N | Distinction |
| 261042 | M | Sidamo Re Lower Than     | 1 | 120 | N | Fail        |
| 266040 | M | Addis Abak A Level or I  | 0 | 60  | N | Withdrawn   |
| 267961 | M | Afar Region Lower Than   | 1 | 60  | N | Fail        |
| 272103 | M | Afar Region A Level or I | 0 | 90  | Y | Fail        |
| 274218 | M | Sidamo Re Lower Than     | 0 | 40  | N | Pass        |
| 278786 | M | Afar Region Lower Than   | 1 | 135 | N | Fail        |
| 285170 | M | Sidamo Re A Level or I   | 0 | 60  | N | Pass        |
| 289397 | M | Oromia Re A Level or I   | 0 | 60  | Y | Pass        |
| 291674 | F | South Regi A Level or I  | 1 | 60  | N | Distinction |
| 293670 | M | South Regi A Level or I  | 0 | 30  | N | Withdrawn   |
| 293686 | M | South Wes A Level or I   | 0 | 30  | N | Distinction |
| 294578 | M | Sidamo Re HE Qualific    | 0 | 60  | N | Withdrawn   |
| 303774 | M | Afar Region Lower Than   | 0 | 30  | N | Withdrawn   |
| 308391 | M | South Regi A Level or I  | 0 | 60  | N | Withdrawn   |
| 321112 | M | North Regi A Level or I  | 0 | 60  | N | Withdrawn   |
| 324257 | M | Sidamo Re A Level or I   | 0 | 60  | N | Pass        |
| 329455 | M | Sidamo Re Post Gradu     | 0 | 30  | N | Distinction |
| 335355 | M | South Regi A Level or I  | 0 | 60  | N | Pass        |
| 338854 | M | Tigrai Regi HE Qualific  | 0 | 150 | N | Pass        |
| 339353 | M | Somalia Re A Level or I  | 1 | 120 | N | Withdrawn   |
| 342957 | M | Afar Region Lower Than   | 0 | 60  | N | Pass        |
| 349069 | M | South Wes Lower Than     | 0 | 60  | N | Fail        |
| 350690 | F | Oromia Re Lower Than     | 0 | 150 | N | Fail        |
| 353368 | M | Amhara Re A Level or I   | 1 | 60  | N | Fail        |
| 353953 | M | Oromia Re A Level or I   | 0 | 30  | N | Pass        |
| 359460 | F | Oromia Re A Level or I   | 0 | 90  | Y | Withdrawn   |
| 359728 | M | Sidamo Re Lower Than     | 0 | 60  | N | Withdrawn   |
| 366424 | F | South Regi HE Qualific   | 0 | 135 | N | Pass        |
| 368306 | M | Somalia Re A Level or I  | 0 | 130 | N | Pass        |
| 371113 | M | Addis Abak Lower Than    | 0 | 60  | Y | Withdrawn   |
| 372812 | M | Oromia Re A Level or I   | 0 | 60  | N | Withdrawn   |
| 380921 | M | Addis Abak HE Qualific   | 0 | 30  | N | Pass        |
| 382432 | M | South Wes Lower Than     | 0 | 60  | N | Withdrawn   |
| 382910 | M | Addis Abak HE Qualific   | 0 | 90  | N | Pass        |
| 383239 | M | Tigrai Regi Lower Than   | 0 | 30  | N | Pass        |

|        |   |                          |   |     |   |             |
|--------|---|--------------------------|---|-----|---|-------------|
| 389267 | M | Amhara Re A Level or I   | 0 | 30  | N | Pass        |
| 393488 | M | Sidamo Re No Formal      | 0 | 120 | N | Pass        |
| 404239 | M | Afar Region A Level or I | 0 | 60  | Y | Fail        |
| 407428 | M | South Regi Lower Than    | 0 | 60  | N | Fail        |
| 410810 | F | South Regi Lower Than    | 0 | 100 | N | Pass        |
| 411381 | M | Addis Abat A Level or I  | 1 | 90  | N | Fail        |
| 413891 | M | Tigrai Regi A Level or I | 0 | 30  | N | Fail        |
| 416689 | F | Afar Region A Level or I | 0 | 120 | N | Withdrawn   |
| 417547 | M | South Regi Lower Than    | 0 | 30  | N | Pass        |
| 420333 | F | Oromia Re Lower Than     | 0 | 30  | N | Pass        |
| 421111 | M | Somalia Re Lower Than    | 0 | 60  | N | Pass        |
| 422341 | M | Somalia Re Lower Than    | 0 | 60  | N | Withdrawn   |
| 424978 | M | Tigrai Regi Lower Than   | 0 | 30  | N | Pass        |
| 426316 | M | Afar Region HE Qualific  | 0 | 60  | N | Pass        |
| 426616 | F | Afar Region HE Qualific  | 0 | 60  | Y | Pass        |
| 431386 | M | Addis Abat A Level or I  | 0 | 60  | N | Fail        |
| 437971 | M | Afar Region A Level or I | 0 | 30  | N | Withdrawn   |
| 441852 | M | South Wes A Level or I   | 1 | 60  | N | Pass        |
| 443948 | M | Sidamo Re Lower Than     | 0 | 60  | N | Pass        |
| 444197 | M | South Regi A Level or I  | 0 | 30  | N | Pass        |
| 444349 | M | Addis Abat A Level or I  | 0 | 30  | Y | Fail        |
| 446077 | M | Somalia Re Lower Than    | 0 | 30  | N | Fail        |
| 446295 | M | Tigrai Regi Lower Than   | 0 | 60  | N | Fail        |
| 447235 | M | Addis Abat A Level or I  | 0 | 30  | N | Distinction |
| 464724 | M | South Regi Lower Than    | 0 | 60  | N | Pass        |
| 467144 | M | Addis Abat A Level or I  | 0 | 30  | N | Pass        |
| 469761 | F | South Wes A Level or I   | 0 | 60  | N | Pass        |
| 469861 | M | Amhara Re HE Qualific    | 0 | 30  | N | Pass        |
| 471018 | M | South Regi Lower Than    | 0 | 60  | N | Fail        |
| 474628 | M | South Wes HE Qualific    | 0 | 30  | N | Pass        |
| 474674 | F | Somalia Re Lower Than    | 0 | 180 | N | Withdrawn   |
| 475497 | M | Afar Region A Level or I | 0 | 30  | N | Fail        |
| 478550 | M | Addis Abat A Level or I  | 0 | 60  | N | Pass        |
| 478791 | M | South Regi HE Qualific   | 0 | 60  | N | Pass        |
| 479607 | M | Tigrai Regi A Level or I | 1 | 180 | N | Fail        |
| 480928 | M | Sidamo Re Lower Than     | 0 | 150 | Y | Withdrawn   |
| 481618 | M | Oromia Re A Level or I   | 0 | 30  | N | Pass        |
| 485920 | M | Addis Abat Lower Than    | 0 | 30  | N | Pass        |
| 486836 | F | Amhara Re A Level or I   | 0 | 60  | N | Pass        |
| 487239 | M | Amhara Re A Level or I   | 1 | 120 | N | Pass        |
| 487494 | M | South Regi No Formal     | 0 | 60  | N | Withdrawn   |
| 488828 | M | Amhara Re A Level or I   | 0 | 30  | N | Fail        |
| 490587 | M | Tigrai Regi Lower Than   | 1 | 120 | Y | Fail        |
| 490662 | M | South Wes A Level or I   | 0 | 60  | N | Fail        |
| 491570 | F | Sidamo Re A Level or I   | 0 | 120 | N | Withdrawn   |
| 492403 | F | South Regi A Level or I  | 0 | 30  | N | Pass        |
| 494427 | M | Afar Region HE Qualific  | 0 | 60  | N | Distinction |

|        |   |                           |   |     |   |             |
|--------|---|---------------------------|---|-----|---|-------------|
| 494872 | M | South Regi Lower Tha      | 0 | 30  | N | Fail        |
| 496108 | M | Addis Abak Lower Tha      | 0 | 60  | N | Pass        |
| 497047 | F | Oromia Re Lower Tha       | 0 | 60  | N | Withdrawn   |
| 497361 | M | Somalia Re A Level or I   | 0 | 30  | N | Fail        |
| 497580 | M | Addis Abak A Level or I   | 0 | 30  | N | Pass        |
| 498261 | M | Sidamo Re Lower Tha       | 0 | 60  | N | Withdrawn   |
| 502640 | M | Sidamo Re A Level or I    | 0 | 60  | N | Withdrawn   |
| 502929 | M | Sidamo Re Lower Tha       | 0 | 60  | N | Pass        |
| 503872 | M | Amhara Re A Level or I    | 0 | 60  | N | Fail        |
| 504062 | M | Afar Regio HE Qualific    | 0 | 90  | N | Pass        |
| 504652 | M | Sidamo Re Lower Tha       | 0 | 30  | N | Pass        |
| 504728 | F | South Wes Lower Tha       | 0 | 60  | N | Pass        |
| 505333 | M | Tigrai Regio Lower Tha    | 0 | 60  | N | Fail        |
| 505767 | M | Afar Regio HE Qualific    | 0 | 60  | N | Distinction |
| 505855 | M | South Wes A Level or I    | 0 | 60  | N | Distinction |
| 510266 | M | Afar Regio A Level or I   | 0 | 60  | N | Distinction |
| 510545 | M | Amhara Re A Level or I    | 0 | 60  | N | Withdrawn   |
| 511199 | M | South Regi A Level or I   | 0 | 30  | N | Fail        |
| 511657 | M | South Regi A Level or I   | 0 | 60  | N | Fail        |
| 513211 | M | Sidamo Re A Level or I    | 1 | 60  | N | Fail        |
| 513672 | M | South Wes Lower Tha       | 0 | 120 | N | Pass        |
| 515125 | M | Sidamo Re A Level or I    | 0 | 120 | N | Fail        |
| 516238 | M | South Wes Lower Tha       | 0 | 60  | N | Pass        |
| 516728 | M | Oromia Re Lower Tha       | 1 | 60  | N | Fail        |
| 518116 | M | South Regi Lower Tha      | 0 | 60  | N | Fail        |
| 519258 | M | South Wes Lower Tha       | 1 | 60  | N | Fail        |
| 519589 | M | Tigrai Regio A Level or I | 0 | 60  | N | Fail        |
| 520824 | F | South Regi Lower Tha      | 0 | 30  | N | Withdrawn   |
| 522525 | M | Somalia Re Lower Tha      | 0 | 60  | N | Pass        |
| 523061 | M | Amhara Re A Level or I    | 0 | 120 | N | Pass        |
| 524276 | M | Afar Regio HE Qualific    | 0 | 60  | N | Fail        |
| 524386 | M | South Regi A Level or I   | 1 | 120 | N | Fail        |
| 525332 | M | Sidamo Re Lower Tha       | 0 | 60  | Y | Fail        |
| 526051 | M | Addis Abak Lower Tha      | 1 | 90  | Y | Distinction |
| 527771 | M | Sidamo Re Lower Tha       | 0 | 60  | N | Fail        |
| 529304 | M | Sidamo Re A Level or I    | 1 | 90  | Y | Pass        |
| 531845 | M | South Regi Lower Tha      | 0 | 30  | N | Fail        |
| 532531 | M | Sidamo Re Lower Tha       | 0 | 120 | N | Pass        |
| 532570 | F | Tigrai Regio A Level or I | 0 | 120 | N | Withdrawn   |
| 536996 | M | Somalia Re A Level or I   | 0 | 30  | N | Withdrawn   |
| 538102 | M | South Regi A Level or I   | 0 | 30  | N | Fail        |
| 540509 | M | Oromia Re Lower Tha       | 0 | 60  | N | Pass        |
| 541003 | M | South Regi A Level or I   | 0 | 60  | N | Pass        |
| 541999 | M | Amhara Re A Level or I    | 0 | 30  | N | Fail        |
| 542050 | M | South Regi HE Qualific    | 0 | 60  | N | Pass        |
| 542524 | M | Somalia Re Lower Tha      | 0 | 30  | N | Pass        |
| 543475 | M | South Wes A Level or I    | 0 | 60  | N | Pass        |

|        |   |                          |   |     |   |             |
|--------|---|--------------------------|---|-----|---|-------------|
| 543924 | M | South Regi A Level or I  | 0 | 60  | N | Fail        |
| 543948 | M | South Wes Lower Thar     | 0 | 60  | N | Pass        |
| 544052 | M | Afar Regioi A Level or I | 0 | 30  | N | Pass        |
| 544295 | M | South Regi A Level or I  | 0 | 60  | Y | Fail        |
| 546400 | F | Afar Regioi A Level or I | 1 | 120 | N | Withdrawn   |
| 547100 | M | Afar Regioi Lower Thar   | 0 | 30  | N | Fail        |
| 547685 | M | Afar Regioi A Level or I | 0 | 60  | N | Withdrawn   |
| 548261 | M | Addis Abak Lower Thar    | 0 | 120 | N | Fail        |
| 548992 | M | Sidamo Re A Level or I   | 1 | 60  | N | Fail        |
| 549401 | F | Addis Abak Lower Thar    | 0 | 60  | N | Withdrawn   |
| 550197 | M | Amhara Re Lower Thar     | 1 | 120 | N | Fail        |
| 550357 | M | Oromia Re A Level or I   | 0 | 30  | N | Pass        |
| 550812 | M | Afar Regioi A Level or I | 1 | 150 | N | Pass        |
| 551528 | M | Sidamo Re Lower Thar     | 0 | 120 | N | Withdrawn   |
| 551856 | M | North Regi Lower Thar    | 0 | 60  | N | Fail        |
| 552067 | M | Sidamo Re HE Qualific    | 0 | 30  | N | Distinction |
| 553914 | M | Sidamo Re A Level or I   | 0 | 30  | N | Withdrawn   |
| 554988 | M | Sidamo Re A Level or I   | 0 | 30  | N | Withdrawn   |
| 555022 | M | North Regi Post Gradu    | 1 | 90  | N | Pass        |
| 555756 | M | Afar Regioi Lower Thar   | 0 | 120 | N | Distinction |
| 557700 | M | North Regi Post Gradu    | 0 | 60  | N | Pass        |
| 558122 | M | Afar Regioi Post Gradu   | 0 | 60  | N | Fail        |
| 558342 | M | Sidamo Re Lower Thar     | 1 | 120 | N | Withdrawn   |
| 558492 | F | Afar Regioi HE Qualific  | 0 | 90  | N | Fail        |
| 559518 | M | Addis Abak Lower Thar    | 0 | 30  | N | Pass        |
| 559977 | M | Sidamo Re Lower Thar     | 0 | 60  | N | Fail        |
| 560951 | M | Oromia Re A Level or I   | 0 | 60  | N | Fail        |
| 561271 | M | South Wes Post Gradu     | 0 | 60  | N | Fail        |
| 561363 | M | Afar Regioi Post Gradu   | 0 | 60  | N | Pass        |
| 561559 | M | South Regi HE Qualific   | 0 | 60  | N | Pass        |
| 561774 | M | Afar Regioi A Level or I | 1 | 90  | N | Distinction |
| 562825 | M | Somalia Re HE Qualific   | 0 | 60  | N | Pass        |
| 563230 | M | Sidamo Re HE Qualific    | 0 | 60  | N | Distinction |
| 563902 | M | North Regi A Level or I  | 0 | 30  | N | Withdrawn   |
| 565275 | M | South Regi A Level or I  | 1 | 150 | N | Withdrawn   |
| 565838 | M | Somalia Re A Level or I  | 0 | 60  | N | Fail        |
| 566337 | M | South Wes HE Qualific    | 0 | 90  | N | Fail        |
| 566422 | M | South Regi A Level or I  | 0 | 30  | N | Pass        |
| 566871 | M | Sidamo Re Lower Thar     | 0 | 90  | N | Fail        |
| 569342 | M | South Regi Lower Thar    | 1 | 120 | N | Withdrawn   |
| 569620 | F | Afar Regioi Lower Thar   | 0 | 60  | N | Fail        |
| 571025 | M | Addis Abak No Formal     | 0 | 60  | N | Withdrawn   |
| 571128 | M | Afar Regioi HE Qualific  | 0 | 60  | N | Pass        |
| 571233 | M | South Wes Lower Thar     | 0 | 60  | N | Fail        |
| 571389 | F | Amhara Re Lower Thar     | 0 | 60  | N | Withdrawn   |
| 571789 | M | South Wes A Level or I   | 0 | 45  | N | Withdrawn   |
| 571946 | M | Amhara Re A Level or I   | 1 | 60  | N | Withdrawn   |

|        |   |                          |   |     |   |             |
|--------|---|--------------------------|---|-----|---|-------------|
| 571963 | M | North Regi A Level or I  | 1 | 90  | N | Pass        |
| 572249 | M | Somalia Re Lower Tha     | 1 | 90  | N | Fail        |
| 573072 | M | South Regi Lower Tha     | 0 | 60  | N | Withdrawn   |
| 573558 | M | North Regi A Level or I  | 0 | 60  | N | Pass        |
| 573665 | M | South Regi Lower Tha     | 0 | 60  | N | Withdrawn   |
| 574508 | M | Amhara Re HE Qualific    | 0 | 30  | N | Pass        |
| 574523 | M | Oromia Re A Level or I   | 1 | 90  | N | Pass        |
| 574580 | F | North Regi Lower Tha     | 1 | 150 | Y | Fail        |
| 574637 | M | South Regi A Level or I  | 0 | 30  | N | Pass        |
| 575162 | M | Afar Regio HE Qualific   | 1 | 60  | N | Pass        |
| 575473 | F | Afar Regio HE Qualific   | 0 | 60  | Y | Pass        |
| 575777 | M | Sidamo Re Lower Tha      | 0 | 60  | N | Pass        |
| 576876 | M | Oromia Re Lower Tha      | 0 | 30  | N | Distinction |
| 577245 | M | South Regi Lower Tha     | 0 | 60  | N | Pass        |
| 577352 | M | Addis Abak Lower Tha     | 1 | 120 | N | Fail        |
| 577460 | M | North Regi HE Qualific   | 1 | 60  | N | Distinction |
| 577562 | M | Amhara Re Lower Tha      | 1 | 60  | N | Pass        |
| 577603 | M | North Regi Lower Tha     | 1 | 120 | N | Withdrawn   |
| 578541 | F | Somalia Re A Level or I  | 0 | 60  | N | Fail        |
| 578634 | M | South Regi Lower Tha     | 0 | 60  | N | Pass        |
| 578958 | M | Tigrai Regi Lower Tha    | 1 | 135 | N | Pass        |
| 581257 | M | South Wes A Level or I   | 0 | 60  | N | Pass        |
| 581269 | M | Sidamo Re A Level or I   | 0 | 120 | N | Pass        |
| 581676 | M | South Regi Lower Tha     | 0 | 60  | N | Pass        |
| 582094 | M | Tigrai Regi A Level or I | 0 | 60  | N | Withdrawn   |
| 583968 | M | Oromia Re Lower Tha      | 0 | 60  | N | Distinction |
| 584698 | M | Tigrai Regi Lower Tha    | 0 | 165 | N | Fail        |
| 585393 | M | South Wes A Level or I   | 0 | 60  | N | Distinction |
| 585397 | M | Addis Abak A Level or I  | 0 | 60  | N | Distinction |
| 585662 | M | Amhara Re A Level or I   | 0 | 90  | N | Pass        |
| 587323 | M | Sidamo Re A Level or I   | 0 | 60  | N | Pass        |
| 588274 | M | South Regi A Level or I  | 0 | 120 | N | Distinction |
| 588765 | M | South Wes A Level or I   | 0 | 90  | N | Pass        |
| 589001 | M | Addis Abak Lower Tha     | 0 | 60  | N | Withdrawn   |
| 589033 | M | Afar Regio HE Qualific   | 1 | 60  | N | Pass        |
| 589083 | M | Afar Regio HE Qualific   | 0 | 45  | N | Withdrawn   |
| 589223 | M | Sidamo Re A Level or I   | 0 | 30  | N | Pass        |
| 589260 | M | Amhara Re Lower Tha      | 0 | 30  | N | Pass        |
| 589722 | M | South Wes A Level or I   | 0 | 60  | N | Withdrawn   |
| 589828 | M | Addis Abak Lower Tha     | 0 | 150 | Y | Pass        |
| 590699 | M | Addis Abak HE Qualific   | 0 | 120 | N | Withdrawn   |
| 591398 | M | South Regi A Level or I  | 1 | 60  | N | Distinction |
| 592080 | M | Afar Regio Lower Tha     | 0 | 60  | N | Withdrawn   |
| 592372 | M | Sidamo Re Lower Tha      | 1 | 60  | N | Pass        |
| 592593 | M | South Regi A Level or I  | 0 | 150 | N | Pass        |
| 592666 | F | Somalia Re Lower Tha     | 0 | 150 | N | Pass        |
| 593123 | M | Tigrai Regi A Level or I | 0 | 60  | N | Fail        |



|        |   |                          |   |     |   |             |
|--------|---|--------------------------|---|-----|---|-------------|
| 593733 | M | Afar Region HE Qualific  | 1 | 60  | N | Distinction |
| 593941 | M | South Regi A Level or I  | 0 | 60  | Y | Withdrawn   |
| 594131 | M | Somalia Re Lower Than    | 1 | 60  | Y | Pass        |
| 594193 | M | South Wes Lower Than     | 0 | 60  | Y | Fail        |
| 594684 | M | Afar Region HE Qualific  | 0 | 60  | N | Distinction |
| 595100 | M | Afar Region Post Gradu   | 1 | 60  | N | Pass        |
| 595356 | M | South Wes A Level or I   | 1 | 90  | N | Withdrawn   |
| 595808 | M | Addis Abak Lower Than    | 1 | 90  | N | Fail        |
| 595992 | M | Sidamo Re Lower Than     | 0 | 60  | N | Pass        |
| 596347 | M | Afar Region A Level or I | 0 | 60  | N | Pass        |
| 596947 | M | Addis Abak Lower Than    | 1 | 90  | N | Pass        |
| 597909 | F | Sidamo Re Lower Than     | 0 | 60  | N | Pass        |
| 599056 | M | South Regi HE Qualific   | 0 | 30  | N | Pass        |
| 599263 | M | Sidamo Re A Level or I   | 1 | 120 | N | Fail        |
| 599341 | M | Afar Region A Level or I | 0 | 90  | N | Pass        |
| 599554 | F | South Regi HE Qualific   | 0 | 60  | N | Pass        |
| 599937 | F | Tigray Regi Lower Than   | 1 | 90  | N | Pass        |
| 600181 | M | Somalia Re HE Qualific   | 0 | 60  | N | Withdrawn   |
| 600623 | M | South Wes A Level or I   | 1 | 90  | N | Distinction |
| 600801 | M | Afar Region A Level or I | 1 | 75  | Y | Pass        |
| 600814 | M | South Wes Lower Than     | 0 | 180 | N | Pass        |
| 600879 | M | South Regi A Level or I  | 1 | 90  | N | Withdrawn   |
| 600987 | M | Amhara Re A Level or I   | 0 | 60  | N | Pass        |
| 601043 | M | North Regi A Level or I  | 0 | 30  | N | Pass        |
| 601054 | M | Sidamo Re A Level or I   | 1 | 120 | N | Pass        |
| 601211 | M | North Regi A Level or I  | 0 | 30  | N | Distinction |
| 601248 | M | Tigray Regi Lower Than   | 1 | 90  | N | Fail        |
| 601386 | M | Oromia Re A Level or I   | 0 | 30  | N | Pass        |
| 602107 | M | Sidamo Re HE Qualific    | 0 | 60  | N | Fail        |
| 602150 | M | Sidamo Re A Level or I   | 1 | 90  | N | Withdrawn   |
| 602721 | M | South Regi HE Qualific   | 0 | 30  | N | Distinction |
| 603531 | M | Sidamo Re HE Qualific    | 0 | 60  | N | Pass        |
| 603791 | M | Afar Region Lower Than   | 0 | 120 | N | Fail        |
| 603832 | M | South Wes A Level or I   | 0 | 60  | N | Pass        |
| 604078 | M | South Wes A Level or I   | 0 | 60  | N | Withdrawn   |
| 604172 | M | South Regi HE Qualific   | 0 | 30  | N | Distinction |
| 604270 | M | Sidamo Re Lower Than     | 0 | 30  | N | Pass        |
| 604337 | M | South Regi A Level or I  | 0 | 30  | N | Fail        |
| 604490 | M | Amhara Re HE Qualific    | 1 | 90  | N | Withdrawn   |
| 604502 | M | North Regi HE Qualific   | 1 | 60  | N | Pass        |
| 604571 | M | Somalia Re Lower Than    | 0 | 120 | N | Pass        |
| 604665 | M | Sidamo Re HE Qualific    | 1 | 120 | N | Withdrawn   |
| 604789 | M | Sidamo Re Lower Than     | 0 | 60  | N | Pass        |
| 605130 | M | Afar Region HE Qualific  | 0 | 75  | N | Withdrawn   |
| 605136 | F | Afar Region HE Qualific  | 0 | 45  | N | Withdrawn   |
| 605367 | M | Sidamo Re A Level or I   | 0 | 30  | N | Pass        |
| 605688 | M | South Regi A Level or I  | 0 | 60  | N | Pass        |

|        |   |                            |   |     |   |             |
|--------|---|----------------------------|---|-----|---|-------------|
| 606025 | M | Amhara Re Lower Tha        | 0 | 60  | N | Withdrawn   |
| 606127 | M | Sidamo Re, A Level or I    | 0 | 60  | N | Fail        |
| 606182 | M | Afar Region A Level or I   | 0 | 30  | N | Pass        |
| 606290 | M | Somalia Re Lower Tha       | 0 | 60  | N | Withdrawn   |
| 606350 | M | Addis Abak A Level or I    | 1 | 150 | N | Fail        |
| 607413 | M | Addis Abak HE Qualific     | 0 | 60  | N | Withdrawn   |
| 607570 | M | Tigrai Region Lower Tha    | 0 | 30  | N | Fail        |
| 607703 | M | Afar Region Lower Tha      | 0 | 60  | N | Withdrawn   |
| 608152 | F | Afar Region HE Qualific    | 0 | 60  | N | Pass        |
| 608694 | M | Addis Abak Lower Tha       | 0 | 60  | N | Withdrawn   |
| 609241 | F | South Regi HE Qualific     | 1 | 120 | N | Withdrawn   |
| 609383 | M | South Regi Lower Tha       | 0 | 60  | N | Fail        |
| 609450 | M | Afar Region HE Qualific    | 0 | 60  | N | Fail        |
| 609605 | M | Tigrai Region HE Qualific  | 0 | 120 | N | Withdrawn   |
| 609645 | M | South Regi A Level or I    | 0 | 120 | N | Pass        |
| 610234 | M | Afar Region HE Qualific    | 0 | 90  | N | Distinction |
| 610287 | M | Addis Abak HE Qualific     | 0 | 60  | N | Withdrawn   |
| 610684 | M | Somalia Re Lower Tha       | 0 | 30  | Y | Pass        |
| 610718 | M | North Regi Lower Tha       | 0 | 60  | N | Fail        |
| 610927 | M | South Wes A Level or I     | 0 | 30  | N | Withdrawn   |
| 611024 | F | North Regi Post Gradu      | 0 | 30  | N | Pass        |
| 611407 | M | South Regi A Level or I    | 0 | 30  | N | Pass        |
| 611502 | M | South Regi Lower Tha       | 0 | 60  | N | Distinction |
| 611971 | M | Amhara Re A Level or I     | 0 | 30  | N | Withdrawn   |
| 611999 | M | South Wes A Level or I     | 0 | 30  | N | Fail        |
| 612023 | M | South Regi Lower Tha       | 0 | 60  | N | Fail        |
| 612124 | M | Oromia Re A Level or I     | 0 | 60  | N | Withdrawn   |
| 612127 | M | South Regi A Level or I    | 0 | 60  | N | Pass        |
| 612287 | M | Tigrai Region Lower Tha    | 0 | 60  | N | Withdrawn   |
| 612327 | M | South Wes A Level or I     | 0 | 30  | N | Distinction |
| 612397 | M | Oromia Re Lower Tha        | 0 | 60  | N | Fail        |
| 612449 | M | Addis Abak A Level or I    | 0 | 30  | N | Pass        |
| 612644 | M | South Wes A Level or I     | 0 | 60  | N | Pass        |
| 612673 | M | Tigrai Region A Level or I | 0 | 60  | N | Fail        |
| 612882 | M | Addis Abak HE Qualific     | 0 | 60  | N | Fail        |
| 613091 | M | Afar Region A Level or I   | 0 | 30  | N | Fail        |
| 613116 | F | South Regi Lower Tha       | 0 | 60  | N | Fail        |
| 613120 | M | Sidamo Re, A Level or I    | 0 | 120 | N | Withdrawn   |
| 613122 | M | Amhara Re HE Qualific      | 0 | 60  | N | Pass        |
| 613133 | M | North Regi Post Gradu      | 0 | 60  | N | Pass        |
| 613213 | M | South Regi Lower Tha       | 0 | 60  | N | Distinction |
| 613387 | M | North Regi HE Qualific     | 0 | 60  | N | Fail        |
| 613501 | M | Addis Abak Lower Tha       | 0 | 60  | N | Pass        |
| 613790 | M | Afar Region HE Qualific    | 0 | 30  | N | Withdrawn   |
| 614234 | M | Afar Region HE Qualific    | 0 | 75  | N | Distinction |
| 614245 | M | Afar Region A Level or I   | 0 | 30  | N | Pass        |
| 614754 | M | Afar Region HE Qualific    | 0 | 30  | N | Pass        |

|        |   |                                 |   |     |   |             |
|--------|---|---------------------------------|---|-----|---|-------------|
| 614952 | M | Sidamo Re Lower Than            | 0 | 60  | N | Withdrawn   |
| 615112 | M | Tigray Region Lower Than        | 0 | 30  | N | Fail        |
| 615229 | M | Sidamo Re A Level or Higher     | 0 | 60  | Y | Pass        |
| 615242 | M | Addis Ababa Lower Than          | 0 | 30  | N | Fail        |
| 616386 | M | Somalia Re Lower Than           | 0 | 60  | N | Pass        |
| 616407 | M | Tigray Region Lower Than        | 0 | 60  | N | Withdrawn   |
| 616439 | M | Addis Ababa A Level or Higher   | 0 | 60  | N | Pass        |
| 616700 | M | Sidamo Re Lower Than            | 0 | 30  | N | Withdrawn   |
| 616708 | M | Oromia Re A Level or Higher     | 0 | 30  | N | Fail        |
| 616831 | M | Amhara Re Lower Than            | 0 | 60  | N | Distinction |
| 616927 | M | North Region A Level or Higher  | 0 | 30  | N | Fail        |
| 616976 | M | Sidamo Re A Level or Higher     | 0 | 60  | N | Withdrawn   |
| 617186 | F | Sidamo Re Lower Than            | 0 | 60  | N | Fail        |
| 617309 | M | Tigray Region A Level or Higher | 0 | 60  | N | Withdrawn   |
| 617331 | M | South Region A Level or Higher  | 0 | 60  | N | Withdrawn   |
| 617355 | F | South Region Lower Than         | 0 | 60  | N | Pass        |
| 617365 | M | Afar Region Lower Than          | 0 | 60  | N | Distinction |
| 617418 | M | Amhara Re A Level or Higher     | 0 | 30  | N | Fail        |
| 617455 | M | Addis Ababa A Level or Higher   | 0 | 30  | N | Pass        |
| 617531 | M | Afar Region HE Qualification    | 0 | 120 | N | Pass        |
| 617898 | M | North Region Lower Than         | 0 | 60  | N | Withdrawn   |
| 618078 | M | Somalia Re A Level or Higher    | 0 | 60  | N | Fail        |
| 618514 | M | South Region A Level or Higher  | 0 | 60  | N | Withdrawn   |
| 618571 | M | North Region A Level or Higher  | 0 | 60  | N | Pass        |
| 618583 | F | Addis Ababa A Level or Higher   | 0 | 90  | Y | Pass        |
| 618606 | M | Somalia Re A Level or Higher    | 0 | 60  | N | Pass        |
| 618619 | M | Somalia Re Lower Than           | 0 | 60  | N | Withdrawn   |
| 618701 | M | Amhara Re Lower Than            | 0 | 90  | N | Withdrawn   |
| 618768 | M | Addis Ababa Lower Than          | 0 | 90  | N | Withdrawn   |
| 618777 | M | South West A Level or Higher    | 0 | 60  | N | Pass        |
| 618824 | F | Tigray Region Lower Than        | 0 | 60  | N | Distinction |
| 618982 | M | Oromia Re Lower Than            | 0 | 30  | N | Pass        |
| 619006 | M | Amhara Re A Level or Higher     | 0 | 60  | N | Withdrawn   |
| 619014 | M | Sidamo Re A Level or Higher     | 0 | 60  | N | Pass        |
| 619292 | M | North Region A Level or Higher  | 0 | 60  | N | Distinction |
| 619369 | M | Addis Ababa Lower Than          | 0 | 60  | N | Withdrawn   |
| 619380 | M | Oromia Re A Level or Higher     | 0 | 30  | N | Pass        |
| 619503 | M | North Region A Level or Higher  | 0 | 30  | N | Pass        |
| 619887 | M | Somalia Re Lower Than           | 0 | 180 | N | Withdrawn   |
| 619927 | M | South West Lower Than           | 0 | 30  | N | Distinction |
| 619928 | F | South West Lower Than           | 0 | 30  | N | Distinction |
| 620215 | M | Amhara Re A Level or Higher     | 0 | 60  | Y | Pass        |
| 620260 | M | Amhara Re A Level or Higher     | 0 | 60  | N | Fail        |
| 620369 | M | Tigray Region A Level or Higher | 0 | 75  | N | Pass        |
| 620376 | M | South Region Lower Than         | 0 | 60  | N | Withdrawn   |
| 620414 | M | Somalia Re Lower Than           | 0 | 30  | N | Fail        |
| 620434 | M | Addis Ababa Lower Than          | 0 | 30  | N | Withdrawn   |

|        |   |                           |   |     |   |             |
|--------|---|---------------------------|---|-----|---|-------------|
| 620646 | M | South Regi Lower Tha      | 0 | 60  | N | Pass        |
| 620713 | M | South Wes Lower Tha       | 0 | 120 | Y | Withdrawn   |
| 620716 | M | South Wes Lower Tha       | 0 | 30  | Y | Distinction |
| 620876 | M | South Regi A Level or I   | 0 | 60  | N | Fail        |
| 620916 | M | Somalia Re Lower Tha      | 0 | 60  | N | Fail        |
| 620918 | M | Sidamo Re, A Level or I   | 0 | 60  | N | Withdrawn   |
| 620977 | M | South Wes A Level or I    | 0 | 60  | N | Withdrawn   |
| 621401 | M | Sidamo Re, A Level or I   | 0 | 60  | N | Fail        |
| 621414 | M | North Regi Lower Tha      | 0 | 30  | N | Pass        |
| 621619 | M | Addis Abak Lower Tha      | 0 | 60  | Y | Withdrawn   |
| 621655 | M | Amhara Re Lower Tha       | 0 | 60  | N | Pass        |
| 621853 | M | Addis Abak Lower Tha      | 0 | 30  | N | Withdrawn   |
| 621906 | M | Oromia Re Lower Tha       | 0 | 60  | N | Fail        |
| 622015 | M | Afar Regioi Lower Tha     | 0 | 60  | N | Fail        |
| 622037 | M | Addis Abak A Level or I   | 0 | 30  | N | Fail        |
| 622280 | M | Afar Regioi Lower Tha     | 0 | 30  | N | Fail        |
| 622315 | M | North Regi Lower Tha      | 0 | 30  | N | Withdrawn   |
| 622368 | M | South Regi Lower Tha      | 0 | 60  | Y | Pass        |
| 622398 | M | Amhara Re HE Qualific     | 0 | 60  | N | Withdrawn   |
| 622425 | M | Amhara Re A Level or I    | 0 | 30  | N | Pass        |
| 622609 | M | Sidamo Re, A Level or I   | 0 | 30  | N | Pass        |
| 622812 | M | Somalia Re A Level or I   | 0 | 30  | Y | Distinction |
| 622948 | M | North Regi A Level or I   | 0 | 60  | N | Pass        |
| 623079 | M | South Wes Lower Tha       | 0 | 30  | N | Pass        |
| 623100 | M | Sidamo Re, A Level or I   | 0 | 30  | N | Pass        |
| 623105 | M | Amhara Re Lower Tha       | 0 | 30  | N | Fail        |
| 623111 | M | Sidamo Re, A Level or I   | 0 | 120 | Y | Withdrawn   |
| 623115 | M | Somalia Re A Level or I   | 0 | 60  | N | Fail        |
| 623184 | F | South Wes A Level or I    | 0 | 60  | N | Fail        |
| 623250 | M | Addis Abak A Level or I   | 0 | 60  | N | Pass        |
| 623421 | M | Somalia Re A Level or I   | 0 | 60  | N | Pass        |
| 623562 | M | South Regi A Level or I   | 0 | 60  | Y | Pass        |
| 623609 | M | Amhara Re Lower Tha       | 0 | 60  | N | Fail        |
| 623667 | M | Oromia Re A Level or I    | 0 | 60  | N | Pass        |
| 623738 | M | Sidamo Re, A Level or I   | 0 | 90  | N | Fail        |
| 623780 | M | Afar Regioi Lower Tha     | 0 | 60  | N | Pass        |
| 623797 | F | North Regi Lower Tha      | 0 | 60  | N | Pass        |
| 623864 | F | Sidamo Re, A Level or I   | 0 | 60  | N | Pass        |
| 623940 | M | Tigrai Regio A Level or I | 0 | 60  | N | Fail        |
| 624034 | M | Somalia Re A Level or I   | 0 | 30  | N | Withdrawn   |
| 624050 | M | Addis Abak Lower Tha      | 0 | 30  | N | Withdrawn   |
| 624092 | M | Oromia Re Lower Tha       | 0 | 30  | N | Fail        |
| 624126 | M | South Regi Lower Tha      | 0 | 60  | N | Withdrawn   |
| 624153 | M | South Regi Lower Tha      | 0 | 60  | N | Fail        |
| 624266 | F | Oromia Re A Level or I    | 0 | 120 | N | Withdrawn   |
| 624384 | M | Sidamo Re Lower Tha       | 0 | 30  | N | Withdrawn   |
| 624441 | M | South Regi A Level or I   | 0 | 60  | N | Pass        |

|        |   |                          |   |     |   |             |
|--------|---|--------------------------|---|-----|---|-------------|
| 624469 | M | Sidamo Re, Lower Tha     | 0 | 30  | N | Pass        |
| 624782 | F | Addis Abak Lower Tha     | 0 | 60  | N | Pass        |
| 625067 | M | South Regi HE Qualific   | 0 | 30  | N | Pass        |
| 625121 | M | Oromia Re Lower Tha      | 0 | 60  | N | Withdrawn   |
| 625126 | M | Amhara Re Lower Tha      | 0 | 60  | N | Pass        |
| 625174 | F | Addis Abak A Level or I  | 0 | 60  | N | Distinction |
| 625207 | M | South Regi HE Qualific   | 0 | 60  | N | Withdrawn   |
| 625213 | M | Sidamo Re, Lower Tha     | 0 | 60  | N | Fail        |
| 625476 | M | Amhara Re Lower Tha      | 0 | 60  | N | Distinction |
| 625527 | M | North Regi A Level or I  | 0 | 60  | N | Pass        |
| 625541 | M | Sidamo Re, Lower Tha     | 0 | 30  | N | Pass        |
| 625740 | M | Amhara Re HE Qualific    | 0 | 60  | N | Pass        |
| 625774 | M | Afar Regioi Lower Tha    | 0 | 60  | N | Withdrawn   |
| 625785 | M | Afar Regioi A Level or I | 0 | 90  | N | Withdrawn   |
| 625790 | M | South Regi Lower Tha     | 0 | 60  | N | Fail        |
| 625841 | M | Amhara Re A Level or I   | 0 | 60  | N | Fail        |
| 625861 | M | South Regi A Level or I  | 0 | 60  | N | Pass        |
| 625884 | M | South Wes A Level or I   | 0 | 60  | N | Withdrawn   |
| 625901 | M | Sidamo Re, Lower Tha     | 0 | 30  | N | Withdrawn   |
| 625950 | M | Somalia Re Lower Tha     | 0 | 60  | N | Withdrawn   |
| 625953 | M | Sidamo Re, HE Qualific   | 0 | 90  | N | Pass        |
| 625975 | M | South Regi A Level or I  | 0 | 60  | Y | Fail        |
| 626022 | F | Somalia Re Lower Tha     | 0 | 30  | N | Withdrawn   |
| 626055 | F | Afar Regioi HE Qualific  | 0 | 90  | N | Fail        |
| 626183 | M | Addis Abak Lower Tha     | 0 | 60  | N | Pass        |
| 626296 | M | South Regi Lower Tha     | 0 | 90  | N | Pass        |
| 626407 | M | Oromia Re Lower Tha      | 0 | 60  | N | Pass        |
| 626444 | M | Sidamo Re, A Level or I  | 0 | 60  | N | Withdrawn   |
| 626494 | M | Afar Regioi A Level or I | 0 | 60  | N | Fail        |
| 626516 | M | Somalia Re Lower Tha     | 0 | 60  | N | Fail        |
| 626519 | M | Sidamo Re, A Level or I  | 0 | 30  | N | Pass        |
| 626625 | M | Afar Regioi A Level or I | 0 | 90  | N | Pass        |
| 626714 | M | South Regi A Level or I  | 0 | 60  | N | Pass        |
| 626749 | M | Sidamo Re, A Level or I  | 0 | 30  | N | Pass        |
| 626753 | M | North Regi A Level or I  | 0 | 30  | N | Pass        |
| 626768 | M | Sidamo Re, A Level or I  | 0 | 30  | Y | Pass        |
| 626772 | M | Sidamo Re, Lower Tha     | 0 | 60  | N | Fail        |
| 626789 | M | South Wes Lower Tha      | 0 | 30  | N | Withdrawn   |
| 626877 | M | South Regi A Level or I  | 0 | 60  | N | Pass        |
| 626906 | M | South Regi Lower Tha     | 0 | 60  | N | Fail        |
| 626998 | M | Sidamo Re, HE Qualific   | 0 | 60  | N | Withdrawn   |
| 627160 | F | Sidamo Re, Lower Tha     | 0 | 120 | N | Withdrawn   |
| 627168 | M | Addis Abak Lower Tha     | 0 | 60  | N | Withdrawn   |
| 627290 | M | Oromia Re Lower Tha      | 0 | 30  | N | Fail        |
| 627387 | M | South Regi HE Qualific   | 0 | 60  | N | Pass        |
| 627390 | M | Amhara Re Lower Tha      | 0 | 60  | N | Withdrawn   |
| 627399 | F | Amhara Re A Level or I   | 0 | 60  | N | Distinction |

|        |   |                          |   |    |   |             |
|--------|---|--------------------------|---|----|---|-------------|
| 627401 | M | Sidamo Re HE Qualific    | 0 | 30 | N | Distinction |
| 627450 | M | North Regi Lower Thar    | 0 | 30 | N | Pass        |
| 627461 | M | Tigrai Regi A Level or I | 0 | 30 | N | Fail        |
| 627471 | F | Afar Regi Lower Thar     | 0 | 30 | N | Pass        |
| 627500 | M | South Regi Lower Thar    | 0 | 60 | N | Withdrawn   |
| 627516 | M | Tigrai Regi Lower Thar   | 0 | 60 | N | Pass        |
| 627636 | M | Somalia Re Lower Thar    | 0 | 60 | N | Pass        |
| 627711 | M | South Regi A Level or I  | 0 | 60 | N | Pass        |
| 627750 | F | Afar Regi HE Qualific    | 0 | 60 | N | Pass        |
| 627907 | M | South Regi Lower Thar    | 0 | 60 | N | Pass        |
| 627961 | M | Tigrai Regi Lower Thar   | 0 | 30 | N | Fail        |
| 628054 | M | Somalia Re Lower Thar    | 0 | 60 | N | Withdrawn   |
| 628214 | M | Oromia Re Lower Thar     | 0 | 60 | N | Withdrawn   |
| 628300 | M | Addis Abak A Level or I  | 0 | 30 | N | Pass        |
| 628366 | M | Afar Regi Lower Thar     | 0 | 60 | N | Withdrawn   |
| 628527 | M | Tigrai Regi A Level or I | 0 | 60 | N | Withdrawn   |
| 628677 | F | Afar Regi Lower Thar     | 0 | 90 | N | Withdrawn   |
| 628686 | M | Addis Abak Lower Thar    | 0 | 90 | N | Withdrawn   |
| 628718 | M | Afar Regi A Level or I   | 0 | 90 | Y | Pass        |
| 628777 | M | Sidamo Re A Level or I   | 0 | 30 | N | Pass        |
| 628910 | M | Sidamo Re A Level or I   | 0 | 30 | N | Pass        |
| 628914 | M | Sidamo Re HE Qualific    | 0 | 30 | N | Fail        |
| 628938 | M | South Regi A Level or I  | 0 | 60 | N | Withdrawn   |
| 628959 | M | Amhara Re A Level or I   | 0 | 30 | N | Pass        |
| 628993 | M | South Regi HE Qualific   | 0 | 60 | N | Withdrawn   |
| 629081 | M | Afar Regi HE Qualific    | 0 | 60 | N | Fail        |
| 629089 | M | Sidamo Re A Level or I   | 0 | 60 | N | Fail        |
| 629202 | M | North Regi HE Qualific   | 0 | 30 | N | Distinction |
| 629234 | M | Sidamo Re Lower Thar     | 0 | 30 | N | Withdrawn   |
| 629283 | M | Afar Regi Lower Thar     | 0 | 30 | N | Withdrawn   |
| 629342 | F | Sidamo Re HE Qualific    | 0 | 60 | N | Fail        |
| 629421 | M | Addis Abak HE Qualific   | 0 | 60 | N | Withdrawn   |
| 629500 | M | Oromia Re A Level or I   | 0 | 60 | N | Fail        |
| 629506 | M | Afar Regi Lower Thar     | 0 | 60 | N | Pass        |
| 629601 | M | Afar Regi HE Qualific    | 0 | 60 | N | Pass        |
| 629623 | M | Sidamo Re A Level or I   | 0 | 60 | N | Withdrawn   |
| 629627 | F | Oromia Re HE Qualific    | 0 | 30 | N | Withdrawn   |
| 629628 | M | Sidamo Re Lower Thar     | 0 | 60 | N | Withdrawn   |
| 629654 | F | South Regi A Level or I  | 0 | 60 | N | Pass        |
| 629753 | M | Afar Regi A Level or I   | 0 | 30 | N | Pass        |
| 629765 | M | Sidamo Re Lower Thar     | 0 | 30 | N | Withdrawn   |
| 629887 | M | Amhara Re HE Qualific    | 0 | 60 | N | Withdrawn   |
| 629893 | M | South Wes A Level or I   | 0 | 60 | N | Withdrawn   |
| 629906 | M | Amhara Re Lower Thar     | 0 | 60 | Y | Fail        |
| 630047 | M | Oromia Re Lower Thar     | 0 | 60 | N | Pass        |
| 630086 | M | Afar Regi HE Qualific    | 0 | 60 | N | Pass        |
| 630120 | F | Sidamo Re A Level or I   | 0 | 30 | N | Withdrawn   |

|        |   |             |              |   |     |   |             |
|--------|---|-------------|--------------|---|-----|---|-------------|
| 630165 | M | North Regi  | A Level or I | 0 | 30  | N | Pass        |
| 630416 | M | Afar Regio  | A Level or I | 0 | 30  | N | Withdrawn   |
| 630449 | M | South Wes   | A Level or I | 0 | 60  | N | Pass        |
| 630514 | M | Somalia Re  | A Level or I | 0 | 60  | N | Withdrawn   |
| 630540 | F | Somalia Re  | Lower Than   | 0 | 90  | N | Withdrawn   |
| 630573 | M | Addis Abak  | HE Qualific  | 0 | 60  | N | Withdrawn   |
| 630585 | M | Amhara Re   | Lower Than   | 0 | 120 | N | Fail        |
| 630606 | M | Addis Abak  | A Level or I | 0 | 60  | N | Pass        |
| 630635 | M | Sidamo Re,  | A Level or I | 0 | 60  | N | Pass        |
| 630657 | M | North Regi  | A Level or I | 0 | 60  | N | Fail        |
| 630696 | M | Addis Abak  | Lower Than   | 0 | 60  | N | Fail        |
| 630722 | M | Amhara Re   | Lower Than   | 0 | 30  | N | Pass        |
| 630825 | M | Somalia Re  | Lower Than   | 0 | 60  | N | Fail        |
| 630888 | M | Amhara Re   | A Level or I | 0 | 60  | N | Pass        |
| 630900 | M | Addis Abak  | A Level or I | 0 | 30  | N | Distinction |
| 630980 | M | South Wes   | A Level or I | 0 | 30  | N | Withdrawn   |
| 631016 | M | North Regi  | Lower Than   | 0 | 30  | N | Pass        |
| 631051 | M | Sidamo Re,  | Lower Than   | 0 | 60  | N | Withdrawn   |
| 631073 | M | South Wes   | HE Qualific  | 0 | 30  | N | Distinction |
| 631117 | M | North Regi  | HE Qualific  | 0 | 30  | N | Distinction |
| 631334 | M | South Regi  | A Level or I | 0 | 60  | Y | Distinction |
| 631356 | M | South Regi  | HE Qualific  | 0 | 30  | N | Pass        |
| 631453 | M | South Regi  | A Level or I | 0 | 60  | N | Pass        |
| 631509 | M | Afar Regio  | Lower Than   | 0 | 30  | N | Pass        |
| 631655 | M | Addis Abak  | HE Qualific  | 0 | 60  | N | Pass        |
| 631657 | M | Afar Regio  | HE Qualific  | 0 | 60  | N | Withdrawn   |
| 631807 | M | Somalia Re  | HE Qualific  | 0 | 30  | N | Withdrawn   |
| 632004 | M | South Regi  | HE Qualific  | 0 | 30  | N | Distinction |
| 632074 | M | Afar Regio  | A Level or I | 0 | 60  | N | Pass        |
| 632083 | M | South Regi  | A Level or I | 0 | 30  | N | Distinction |
| 632111 | M | Amhara Re   | A Level or I | 0 | 60  | N | Distinction |
| 632133 | F | South Regi  | Lower Than   | 0 | 60  | N | Withdrawn   |
| 632135 | M | South Regi  | Lower Than   | 0 | 60  | N | Withdrawn   |
| 632312 | M | South Wes   | A Level or I | 0 | 60  | N | Withdrawn   |
| 632329 | M | Sidamo Re,  | No Formal    | 0 | 30  | N | Withdrawn   |
| 632376 | M | South Wes   | Lower Than   | 0 | 30  | N | Withdrawn   |
| 632389 | M | North Regi  | A Level or I | 0 | 30  | N | Distinction |
| 632459 | M | Sidamo Re,  | A Level or I | 0 | 60  | N | Pass        |
| 632641 | F | South Regi  | A Level or I | 0 | 60  | N | Pass        |
| 632700 | M | Sidamo Re,  | A Level or I | 0 | 30  | N | Pass        |
| 632780 | M | Sidamo Re,  | HE Qualific  | 0 | 60  | N | Withdrawn   |
| 632800 | M | South Wes   | Lower Than   | 0 | 30  | N | Fail        |
| 632883 | M | Tigrai Regi | Lower Than   | 0 | 30  | N | Pass        |
| 632889 | M | Sidamo Re,  | A Level or I | 0 | 60  | N | Withdrawn   |
| 632904 | M | Afar Regio  | HE Qualific  | 0 | 60  | N | Distinction |
| 632977 | M | South Wes   | A Level or I | 0 | 30  | Y | Pass        |
| 633107 | M | Afar Regio  | HE Qualific  | 0 | 60  | N | Pass        |

|         |   |                          |   |    |   |             |
|---------|---|--------------------------|---|----|---|-------------|
| 633259  | M | Amhara Re Lower Tha      | 0 | 30 | N | Fail        |
| 633270  | M | South Wes No Formal      | 0 | 60 | N | Pass        |
| 633304  | M | Amhara Re Lower Tha      | 0 | 30 | N | Pass        |
| 633310  | M | Somalia Re A Level or I  | 0 | 60 | N | Pass        |
| 633330  | M | Oromia Re A Level or I   | 0 | 60 | N | Fail        |
| 633334  | M | Addis Abak Lower Tha     | 0 | 60 | N | Fail        |
| 633395  | M | Amhara Re A Level or I   | 0 | 60 | N | Fail        |
| 633432  | M | South Regi A Level or I  | 0 | 60 | N | Fail        |
| 633455  | M | Amhara Re Lower Tha      | 0 | 60 | N | Pass        |
| 633511  | M | Addis Abak A Level or I  | 0 | 30 | N | Pass        |
| 633530  | M | South Regi Lower Tha     | 0 | 60 | N | Withdrawn   |
| 633544  | M | Afar Regioi Lower Tha    | 0 | 30 | N | Pass        |
| 633605  | F | Afar Regioi A Level or I | 0 | 60 | N | Pass        |
| 633634  | M | North Regi A Level or I  | 0 | 30 | N | Pass        |
| 633637  | M | Sidamo Re A Level or I   | 0 | 60 | N | Fail        |
| 633695  | M | Sidamo Re A Level or I   | 0 | 60 | N | Distinction |
| 633716  | M | Tigrai Regi A Level or I | 0 | 60 | N | Pass        |
| 633746  | M | Sidamo Re A Level or I   | 0 | 30 | N | Distinction |
| 633859  | M | North Regi Lower Tha     | 0 | 60 | N | Withdrawn   |
| 633998  | F | Afar Regioi HE Qualific  | 0 | 60 | N | Pass        |
| 634040  | M | Afar Regioi A Level or I | 0 | 60 | N | Fail        |
| 634083  | M | South Wes A Level or I   | 0 | 60 | N | Withdrawn   |
| 634193  | M | Somalia Re Lower Tha     | 0 | 30 | N | Pass        |
| 634216  | M | South Wes HE Qualific    | 0 | 60 | N | Distinction |
| 634241  | M | South Regi A Level or I  | 0 | 60 | N | Distinction |
| 634309  | M | Sidamo Re A Level or I   | 0 | 30 | N | Pass        |
| 634318  | M | Tigrai Regi Lower Tha    | 0 | 30 | N | Pass        |
| 634433  | M | North Regi A Level or I  | 0 | 60 | N | Fail        |
| 634570  | M | Addis Abak HE Qualific   | 0 | 60 | N | Distinction |
| 634578  | M | Afar Regioi A Level or I | 0 | 60 | N | Withdrawn   |
| 634600  | M | Afar Regioi Lower Tha    | 0 | 30 | N | Pass        |
| 634737  | M | Sidamo Re Lower Tha      | 0 | 90 | N | Fail        |
| 634744  | M | Afar Regioi HE Qualific  | 0 | 60 | N | Fail        |
| 634817  | M | North Regi Lower Tha     | 0 | 60 | N | Pass        |
| 634862  | F | South Regi A Level or I  | 0 | 60 | N | Fail        |
| 634869  | M | Sidamo Re A Level or I   | 0 | 30 | N | Pass        |
| 635041  | M | Somalia Re A Level or I  | 0 | 60 | N | Pass        |
| 635043  | M | Somalia Re HE Qualific   | 0 | 60 | N | Distinction |
| 635109  | M | South Wes Lower Tha      | 0 | 60 | N | Pass        |
| 635515  | M | Afar Regioi Lower Tha    | 0 | 60 | N | Fail        |
| 996047  | M | Amhara Re A Level or I   | 0 | 60 | N | Pass        |
| 1268772 | M | Afar Regioi HE Qualific  | 0 | 60 | N | Pass        |
| 1410398 | M | Amhara Re HE Qualific    | 0 | 60 | N | Pass        |
| 1457691 | M | Addis Abak Lower Tha     | 0 | 90 | N | Pass        |
| 1500950 | M | South Wes A Level or I   | 0 | 60 | N | Distinction |
| 1573624 | M | Addis Abak Lower Tha     | 0 | 30 | N | Pass        |
| 1618172 | F | Somalia Re A Level or I  | 0 | 30 | N | Pass        |



|         |   |                          |   |     |   |             |
|---------|---|--------------------------|---|-----|---|-------------|
| 1644328 | M | Somalia Re HE Qualific   | 0 | 60  | N | Withdrawn   |
| 1661805 | M | South Wes Lower Thai     | 0 | 30  | N | Distinction |
| 1663815 | M | Afar Region HE Qualific  | 0 | 30  | N | Fail        |
| 1664171 | M | Amhara Re Lower Thai     | 0 | 90  | Y | Withdrawn   |
| 1664810 | M | Oromia Re Lower Thai     | 0 | 60  | N | Withdrawn   |
| 1683692 | M | South Regi A Level or I  | 0 | 60  | N | Withdrawn   |
| 1700371 | M | Addis Abat HE Qualific   | 0 | 30  | N | Pass        |
| 1763786 | M | South Regi A Level or I  | 0 | 60  | N | Distinction |
| 1780737 | M | South Regi A Level or I  | 0 | 60  | Y | Fail        |
| 1789319 | F | Oromia Re HE Qualific    | 0 | 60  | N | Pass        |
| 1810414 | M | South Regi HE Qualific   | 0 | 30  | N | Pass        |
| 1828112 | M | South Regi A Level or I  | 0 | 60  | N | Fail        |
| 1839181 | M | Sidamo Re HE Qualific    | 0 | 90  | N | Pass        |
| 1861830 | M | South Wes Lower Thai     | 1 | 70  | N | Pass        |
| 1863564 | M | North Regi HE Qualific   | 0 | 60  | N | Withdrawn   |
| 1878160 | M | South Regi A Level or I  | 1 | 150 | N | Withdrawn   |
| 1894419 | M | Sidamo Re A Level or I   | 0 | 60  | N | Fail        |
| 1908526 | M | Afar Region HE Qualific  | 0 | 60  | N | Fail        |
| 2002664 | F | Afar Region HE Qualific  | 0 | 30  | N | Pass        |
| 2026585 | M | South Wes HE Qualific    | 0 | 30  | N | Distinction |
| 2064873 | M | Somalia Re Lower Thai    | 0 | 60  | N | Pass        |
| 2139273 | M | Afar Region A Level or I | 0 | 90  | N | Pass        |
| 2187588 | M | South Wes A Level or I   | 1 | 60  | N | Pass        |
| 2188680 | M | South Wes Lower Thai     | 0 | 60  | N | Withdrawn   |
| 2198914 | M | South Regi HE Qualific   | 0 | 90  | N | Pass        |
| 2249143 | M | Addis Abat Lower Thai    | 0 | 30  | N | Pass        |
| 2295254 | M | Amhara Re HE Qualific    | 0 | 30  | N | Withdrawn   |
| 2329539 | M | Sidamo Re Lower Thai     | 0 | 60  | N | Withdrawn   |
| 2359504 | F | Afar Region Post Gradu   | 0 | 30  | N | Fail        |
| 2364637 | M | Addis Abat Lower Thai    | 0 | 30  | N | Pass        |
| 2376512 | M | Sidamo Re Lower Thai     | 0 | 30  | N | Pass        |
| 2384615 | M | Afar Region A Level or I | 1 | 150 | N | Withdrawn   |
| 2388492 | F | Afar Region Lower Thai   | 0 | 30  | N | Withdrawn   |
| 2391004 | M | Afar Region HE Qualific  | 0 | 60  | N | Pass        |
| 2434339 | M | South Wes A Level or I   | 1 | 135 | N | Distinction |
| 2455893 | M | South Regi HE Qualific   | 0 | 90  | N | Pass        |
| 2472178 | M | Addis Abat A Level or I  | 0 | 30  | N | Fail        |
| 2478799 | M | Addis Abat Lower Thai    | 0 | 60  | N | Fail        |
| 2492827 | M | Tigray Regi A Level or I | 0 | 60  | N | Pass        |
| 2520067 | F | Sidamo Re A Level or I   | 0 | 180 | Y | Withdrawn   |
| 2554047 | M | Somalia Re A Level or I  | 0 | 60  | N | Withdrawn   |
| 2567038 | M | Afar Region A Level or I | 0 | 60  | N | Distinction |
| 2569912 | M | South Wes A Level or I   | 0 | 60  | N | Withdrawn   |
| 2577893 | M | Oromia Re Lower Thai     | 0 | 30  | N | Pass        |
| 2595665 | F | Tigray Regi HE Qualific  | 0 | 30  | N | Pass        |
| 2600862 | F | Afar Region A Level or I | 0 | 90  | N | Distinction |
| 2603195 | M | South Wes A Level or I   | 0 | 60  | N | Pass        |

|         |   |                            |   |     |   |             |
|---------|---|----------------------------|---|-----|---|-------------|
| 2613219 | M | Afar Region HE Qualific    | 0 | 30  | N | Fail        |
| 2619011 | M | Sidamo Re A Level or I     | 0 | 60  | N | Withdrawn   |
| 2620661 | M | Amhara Re A Level or I     | 0 | 120 | N | Pass        |
| 2632165 | M | Tigray Region A Level or I | 0 | 60  | N | Pass        |
| 2642697 | M | Somalia Re Lower Than      | 0 | 30  | N | Distinction |
| 2647314 | M | Tigray Region A Level or I | 0 | 30  | N | Pass        |
| 2662742 | M | Afar Region Lower Than     | 0 | 60  | N | Fail        |
| 28770   | M | Afar Region Lower Than     | 0 | 30  | N | Fail        |
| 46048   | M | Addis Abat A Level or I    | 0 | 30  | N | Withdrawn   |
| 47061   | M | Somalia Re A Level or I    | 0 | 30  | N | Pass        |
| 60809   | M | Oromia Re Lower Than       | 0 | 120 | N | Pass        |
| 62034   | M | South Region Lower Than    | 0 | 60  | N | Pass        |
| 67539   | M | South West Lower Than      | 0 | 60  | N | Pass        |
| 67685   | M | South Region A Level or I  | 0 | 180 | N | Pass        |
| 70827   | M | Somalia Re HE Qualific     | 0 | 210 | N | Withdrawn   |
| 76579   | F | Sidamo Re HE Qualific      | 1 | 120 | N | Pass        |
| 80358   | M | Afar Region Lower Than     | 0 | 120 | N | Pass        |
| 89545   | M | South Region HE Qualific   | 0 | 30  | N | Pass        |
| 108281  | M | Afar Region HE Qualific    | 0 | 30  | N | Pass        |
| 108497  | M | South West Lower Than      | 0 | 60  | N | Pass        |
| 110789  | F | Somalia Re Lower Than      | 0 | 60  | N | Pass        |
| 121163  | M | Sidamo Re Lower Than       | 0 | 30  | N | Withdrawn   |
| 124304  | M | North Region A Level or I  | 0 | 60  | N | Pass        |
| 124711  | M | Sidamo Re Lower Than       | 0 | 60  | N | Withdrawn   |
| 126450  | M | Amhara Re A Level or I     | 0 | 60  | N | Pass        |
| 128817  | M | Addis Abat Lower Than      | 0 | 60  | N | Withdrawn   |
| 131776  | F | Oromia Re A Level or I     | 0 | 60  | N | Pass        |
| 134212  | M | North Region A Level or I  | 0 | 60  | N | Pass        |
| 135763  | M | Somalia Re A Level or I    | 1 | 40  | N | Pass        |
| 142092  | M | Amhara Re HE Qualific      | 0 | 120 | N | Distinction |
| 158708  | M | Addis Abat HE Qualific     | 0 | 30  | N | Pass        |
| 159287  | M | Afar Region HE Qualific    | 0 | 90  | N | Pass        |
| 161781  | M | Afar Region A Level or I   | 0 | 90  | N | Fail        |
| 162210  | M | Amhara Re Lower Than       | 0 | 90  | N | Distinction |
| 164708  | M | Sidamo Re A Level or I     | 0 | 60  | N | Withdrawn   |
| 171843  | M | Somalia Re Lower Than      | 0 | 90  | N | Pass        |
| 173341  | M | Afar Region HE Qualific    | 0 | 60  | N | Fail        |
| 174512  | M | South Region Lower Than    | 1 | 90  | N | Withdrawn   |
| 175940  | M | Sidamo Re A Level or I     | 0 | 60  | N | Pass        |
| 177186  | M | Addis Abat A Level or I    | 0 | 30  | N | Withdrawn   |
| 177472  | F | Addis Abat Lower Than      | 0 | 30  | N | Fail        |
| 189117  | M | South Region Lower Than    | 0 | 30  | N | Distinction |
| 190780  | M | Afar Region HE Qualific    | 0 | 120 | N | Pass        |
| 191000  | M | Afar Region Post Gradu     | 1 | 30  | N | Fail        |
| 195252  | F | Addis Abat A Level or I    | 0 | 50  | N | Fail        |
| 195897  | M | Oromia Re Lower Than       | 0 | 60  | N | Pass        |
| 196132  | M | South Region Lower Than    | 0 | 60  | N | Pass        |

|        |   |                          |   |     |   |             |
|--------|---|--------------------------|---|-----|---|-------------|
| 202606 | M | South Wes HE Qualific    | 0 | 60  | N | Pass        |
| 231017 | M | Afar Regioꝛ A Level or I | 0 | 30  | N | Pass        |
| 232078 | M | Sidamo Re HE Qualific    | 0 | 30  | N | Fail        |
| 233335 | M | Sidamo Re A Level or I   | 0 | 30  | Y | Pass        |
| 233685 | M | South Wes A Level or I   | 0 | 60  | N | Pass        |
| 236512 | M | Amhara Re Lower Than     | 0 | 120 | N | Fail        |
| 239908 | M | South Regi A Level or I  | 0 | 150 | N | Pass        |
| 241728 | M | South Regi A Level or I  | 0 | 30  | N | Distinction |
| 243926 | M | Somalia Re A Level or I  | 0 | 90  | N | Fail        |
| 247653 | M | Sidamo Re A Level or I   | 0 | 90  | N | Withdrawn   |
| 250159 | F | Oromia Re HE Qualific    | 0 | 150 | N | Pass        |
| 253496 | M | Tigrai Regi Lower Than   | 0 | 60  | N | Pass        |
| 255449 | M | Afar Regioꝛ A Level or I | 1 | 30  | N | Withdrawn   |
| 269220 | M | South Regi Lower Than    | 0 | 60  | Y | Pass        |
| 270764 | M | Afar Regioꝛ A Level or I | 0 | 60  | N | Withdrawn   |
| 270988 | M | South Regi HE Qualific   | 0 | 60  | N | Pass        |
| 274967 | M | Afar Regioꝛ A Level or I | 0 | 30  | N | Pass        |
| 284095 | F | South Wes HE Qualific    | 0 | 120 | N | Distinction |
| 285934 | M | North Regi Lower Than    | 0 | 60  | N | Pass        |
| 286262 | M | South Regi Lower Than    | 1 | 120 | Y | Pass        |
| 286527 | F | Amhara Re A Level or I   | 1 | 90  | N | Pass        |
| 293321 | M | South Regi A Level or I  | 0 | 120 | N | Withdrawn   |
| 296222 | M | Oromia Re A Level or I   | 0 | 90  | N | Distinction |
| 298148 | M | Sidamo Re HE Qualific    | 0 | 80  | N | Pass        |
| 299707 | F | Somalia Re A Level or I  | 0 | 150 | Y | Pass        |
| 302363 | M | Sidamo Re A Level or I   | 0 | 30  | N | Withdrawn   |
| 307953 | M | Afar Regioꝛ Lower Than   | 0 | 30  | N | Pass        |
| 310968 | M | South Wes Lower Than     | 0 | 60  | N | Pass        |
| 316454 | F | Amhara Re Lower Than     | 0 | 120 | Y | Withdrawn   |
| 318769 | M | Oromia Re Lower Than     | 0 | 60  | N | Pass        |
| 318855 | M | Oromia Re Lower Than     | 0 | 60  | N | Fail        |
| 322641 | M | Addis Abak Lower Than    | 0 | 60  | N | Withdrawn   |
| 325518 | M | South Regi Lower Than    | 0 | 60  | N | Withdrawn   |
| 331622 | M | Somalia Re Lower Than    | 0 | 150 | N | Withdrawn   |
| 332945 | M | Oromia Re HE Qualific    | 0 | 60  | N | Pass        |
| 333637 | M | Afar Regioꝛ A Level or I | 0 | 30  | N | Pass        |
| 333976 | M | South Regi A Level or I  | 1 | 30  | N | Fail        |
| 336014 | M | Afar Regioꝛ HE Qualific  | 0 | 120 | N | Withdrawn   |
| 337741 | M | Sidamo Re Lower Than     | 0 | 50  | N | Withdrawn   |
| 341010 | M | Afar Regioꝛ Lower Than   | 0 | 30  | N | Fail        |
| 342187 | M | North Regi Lower Than    | 0 | 60  | N | Fail        |
| 344740 | M | Sidamo Re Lower Than     | 0 | 90  | N | Distinction |
| 345256 | M | Afar Regioꝛ HE Qualific  | 0 | 60  | N | Pass        |
| 345288 | M | North Regi A Level or I  | 0 | 60  | N | Pass        |
| 346093 | M | South Wes Post Gradu     | 0 | 30  | N | Pass        |
| 348288 | M | Addis Abak A Level or I  | 1 | 60  | N | Pass        |
| 355049 | M | Sidamo Re A Level or I   | 0 | 60  | N | Pass        |

|        |   |                            |   |     |   |             |
|--------|---|----------------------------|---|-----|---|-------------|
| 355617 | F | Afar Region HE Qualific    | 0 | 30  | N | Pass        |
| 356735 | M | Afar Region A Level or I   | 0 | 30  | Y | Pass        |
| 360266 | F | North Region HE Qualific   | 0 | 60  | N | Distinction |
| 364322 | M | Sidamo Region Lower Than   | 0 | 30  | N | Pass        |
| 369713 | M | South Region A Level or I  | 0 | 60  | N | Pass        |
| 369942 | M | South Region HE Qualific   | 0 | 60  | N | Distinction |
| 372577 | M | South Region Lower Than    | 0 | 180 | N | Withdrawn   |
| 378825 | M | South West A Level or I    | 0 | 60  | N | Pass        |
| 381185 | M | Afar Region HE Qualific    | 0 | 120 | N | Distinction |
| 381586 | M | Sidamo Region A Level or I | 0 | 60  | N | Pass        |
| 381983 | F | Tigray Region HE Qualific  | 0 | 30  | N | Fail        |
| 382432 | M | South West Lower Than      | 1 | 60  | N | Withdrawn   |
| 387944 | M | Oromia Region A Level or I | 0 | 60  | N | Fail        |
| 388252 | M | South Region Lower Than    | 1 | 30  | N | Withdrawn   |
| 390332 | M | Amhara Region Lower Than   | 0 | 60  | N | Withdrawn   |
| 391301 | M | Addis Ababa Lower Than     | 1 | 30  | N | Fail        |
| 391572 | M | South Region A Level or I  | 0 | 60  | N | Withdrawn   |
| 396674 | M | South Region A Level or I  | 0 | 60  | N | Pass        |
| 398019 | M | Sidamo Region A Level or I | 1 | 30  | N | Fail        |
| 398413 | M | Tigray Region A Level or I | 0 | 60  | N | Pass        |
| 401240 | M | South Region A Level or I  | 0 | 60  | N | Pass        |
| 402295 | M | Somalia Region Lower Than  | 0 | 60  | N | Pass        |
| 402906 | M | Sidamo Region HE Qualific  | 0 | 30  | N | Withdrawn   |
| 404200 | M | Sidamo Region A Level or I | 0 | 45  | N | Pass        |
| 404695 | F | Sidamo Region Lower Than   | 0 | 90  | N | Pass        |
| 405125 | M | South Region A Level or I  | 0 | 90  | N | Distinction |
| 407731 | M | Afar Region Lower Than     | 0 | 60  | N | Pass        |
| 408763 | M | Amhara Region A Level or I | 0 | 60  | N | Pass        |
| 410587 | M | Amhara Region HE Qualific  | 0 | 65  | N | Pass        |
| 410592 | M | Afar Region HE Qualific    | 0 | 120 | N | Pass        |
| 411619 | M | South West A Level or I    | 0 | 30  | N | Pass        |
| 418035 | M | Sidamo Region Lower Than   | 0 | 30  | Y | Pass        |
| 418216 | M | South Region Lower Than    | 0 | 40  | N | Distinction |
| 423947 | M | Afar Region A Level or I   | 1 | 60  | N | Pass        |
| 425053 | F | Afar Region A Level or I   | 0 | 60  | Y | Fail        |
| 425858 | M | Sidamo Region Lower Than   | 0 | 60  | Y | Fail        |
| 432484 | M | Afar Region A Level or I   | 0 | 30  | N | Withdrawn   |
| 434347 | M | Tigray Region A Level or I | 0 | 30  | N | Distinction |
| 434503 | M | Oromia Region Lower Than   | 1 | 60  | N | Withdrawn   |
| 436213 | M | South West HE Qualific     | 0 | 60  | N | Fail        |
| 436900 | M | South Region Lower Than    | 0 | 60  | N | Fail        |
| 441385 | M | Afar Region Post Gradu     | 0 | 90  | N | Fail        |
| 441895 | M | Sidamo Region A Level or I | 0 | 30  | Y | Pass        |
| 442359 | M | South Region Lower Than    | 0 | 60  | N | Pass        |
| 443200 | M | Tigray Region HE Qualific  | 0 | 60  | N | Pass        |
| 443498 | M | Oromia Region Lower Than   | 0 | 30  | N | Distinction |
| 443701 | F | South West A Level or I    | 0 | 60  | N | Withdrawn   |

|        |   |                          |   |     |   |             |
|--------|---|--------------------------|---|-----|---|-------------|
| 444814 | M | Sidamo Re HE Qualific    | 0 | 60  | N | Withdrawn   |
| 445049 | M | Amhara Re A Level or I   | 1 | 30  | Y | Pass        |
| 446397 | M | Afar Region HE Qualific  | 1 | 30  | N | Fail        |
| 447659 | M | Addis Abab Lower Than    | 1 | 120 | N | Withdrawn   |
| 464780 | M | Addis Abab A Level or I  | 0 | 90  | N | Pass        |
| 464957 | M | Sidamo Re A Level or I   | 0 | 90  | N | Fail        |
| 465406 | M | Amhara Re A Level or I   | 0 | 60  | N | Pass        |
| 466430 | M | South Wes No Formal      | 2 | 60  | N | Withdrawn   |
| 466508 | M | South Regi HE Qualific   | 0 | 30  | N | Pass        |
| 466892 | M | Sidamo Re A Level or I   | 0 | 60  | N | Pass        |
| 469424 | M | Oromia Re A Level or I   | 0 | 90  | N | Distinction |
| 470461 | M | Afar Region Lower Than   | 0 | 60  | N | Pass        |
| 472762 | M | South Regi A Level or I  | 0 | 180 | N | Distinction |
| 472845 | M | South Regi Lower Than    | 0 | 30  | N | Fail        |
| 474290 | M | Sidamo Re A Level or I   | 0 | 120 | N | Pass        |
| 476438 | F | South Wes A Level or I   | 0 | 60  | N | Pass        |
| 476497 | M | South Regi A Level or I  | 0 | 60  | N | Fail        |
| 479987 | M | Afar Region HE Qualific  | 1 | 60  | N | Pass        |
| 480579 | F | Sidamo Re A Level or I   | 0 | 60  | N | Pass        |
| 481787 | M | South Regi A Level or I  | 0 | 60  | N | Pass        |
| 481884 | M | Amhara Re Lower Than     | 0 | 30  | N | Fail        |
| 482030 | M | Addis Abab Lower Than    | 0 | 60  | N | Pass        |
| 483131 | M | Tigray Regi A Level or I | 0 | 60  | N | Pass        |
| 483858 | F | Afar Region A Level or I | 0 | 60  | N | Pass        |
| 490443 | M | Amhara Re A Level or I   | 0 | 60  | N | Withdrawn   |
| 491170 | M | Sidamo Re A Level or I   | 0 | 30  | N | Pass        |
| 491664 | M | Somalia Re A Level or I  | 0 | 60  | N | Pass        |
| 494270 | M | Sidamo Re A Level or I   | 0 | 90  | N | Pass        |
| 495429 | M | South Wes HE Qualific    | 0 | 60  | N | Distinction |
| 496530 | M | Somalia Re Lower Than    | 1 | 60  | N | Fail        |
| 500440 | M | Sidamo Re A Level or I   | 0 | 90  | N | Withdrawn   |
| 501422 | M | Amhara Re A Level or I   | 0 | 60  | N | Withdrawn   |
| 502004 | M | Amhara Re A Level or I   | 0 | 60  | N | Pass        |
| 502548 | F | North Regi Lower Than    | 0 | 60  | N | Pass        |
| 506618 | M | South Wes HE Qualific    | 1 | 240 | N | Withdrawn   |
| 507967 | M | Afar Region HE Qualific  | 0 | 60  | N | Fail        |
| 509780 | F | Sidamo Re Lower Than     | 0 | 60  | N | Distinction |
| 510402 | M | South Regi A Level or I  | 0 | 60  | N | Pass        |
| 510435 | M | Tigray Regi Lower Than   | 2 | 30  | N | Withdrawn   |
| 515977 | M | Afar Region Lower Than   | 0 | 60  | N | Distinction |
| 516398 | M | North Regi HE Qualific   | 0 | 60  | N | Withdrawn   |
| 517094 | M | North Regi A Level or I  | 2 | 60  | N | Distinction |
| 520077 | M | South Regi Lower Than    | 0 | 90  | N | Distinction |
| 520750 | M | Tigray Regi HE Qualific  | 0 | 90  | N | Fail        |
| 520824 | F | South Regi Lower Than    | 1 | 30  | N | Withdrawn   |
| 521350 | M | Afar Region HE Qualific  | 0 | 30  | Y | Fail        |
| 521541 | M | Somalia Re A Level or I  | 0 | 60  | N | Fail        |

|        |   |                            |   |     |   |             |
|--------|---|----------------------------|---|-----|---|-------------|
| 522645 | M | Amhara Re HE Qualific      | 0 | 60  | N | Fail        |
| 523804 | M | Afar Region Lower Than     | 0 | 30  | N | Fail        |
| 523872 | M | South Region Lower Than    | 0 | 60  | N | Pass        |
| 524431 | F | South Region A Level or I  | 0 | 60  | N | Withdrawn   |
| 525217 | M | South Region Lower Than    | 0 | 60  | N | Pass        |
| 525625 | M | Sidamo Region A Level or I | 0 | 60  | N | Pass        |
| 529287 | M | Afar Region Lower Than     | 0 | 90  | Y | Withdrawn   |
| 529670 | M | Sidamo Region Lower Than   | 0 | 60  | N | Pass        |
| 530087 | M | Amhara Re HE Qualific      | 0 | 90  | N | Pass        |
| 532579 | M | Amhara Re A Level or I     | 0 | 30  | N | Pass        |
| 532846 | M | South West Lower Than      | 0 | 60  | N | Fail        |
| 536984 | M | Addis Ababa Lower Than     | 0 | 60  | N | Pass        |
| 540219 | M | Tigray Region A Level or I | 0 | 60  | N | Distinction |
| 542167 | M | Afar Region HE Qualific    | 0 | 60  | Y | Withdrawn   |
| 542279 | F | Sidamo Region HE Qualific  | 0 | 60  | N | Pass        |
| 543931 | M | Amhara Region Lower Than   | 0 | 60  | N | Pass        |
| 544071 | M | South Region Lower Than    | 0 | 150 | N | Withdrawn   |
| 545493 | M | Afar Region HE Qualific    | 0 | 90  | N | Pass        |
| 546400 | F | Afar Region A Level or I   | 2 | 60  | N | Withdrawn   |
| 547153 | M | Tigray Region A Level or I | 0 | 60  | N | Pass        |
| 548807 | M | Tigray Region A Level or I | 0 | 60  | N | Pass        |
| 549922 | M | Oromia Region A Level or I | 0 | 120 | N | Fail        |
| 550573 | M | Sidamo Region HE Qualific  | 2 | 90  | N | Pass        |
| 551117 | M | South Region A Level or I  | 0 | 30  | N | Withdrawn   |
| 551182 | M | South Region Lower Than    | 1 | 30  | N | Pass        |
| 551589 | M | Amhara Region Lower Than   | 0 | 120 | N | Withdrawn   |
| 552441 | F | Sidamo Region A Level or I | 0 | 90  | N | Pass        |
| 553753 | M | Amhara Region Lower Than   | 0 | 60  | N | Withdrawn   |
| 554235 | M | Amhara Region Lower Than   | 1 | 30  | N | Fail        |
| 554459 | M | Amhara Region A Level or I | 1 | 60  | N | Pass        |
| 554999 | M | Amhara Region A Level or I | 1 | 60  | Y | Withdrawn   |
| 555051 | M | Oromia Region Lower Than   | 0 | 60  | N | Withdrawn   |
| 556450 | M | Afar Region A Level or I   | 1 | 60  | Y | Fail        |
| 557229 | M | Amhara Region Lower Than   | 0 | 60  | N | Pass        |
| 558342 | M | Sidamo Region Lower Than   | 2 | 120 | N | Withdrawn   |
| 558509 | M | Addis Ababa Lower Than     | 0 | 60  | N | Pass        |
| 559113 | F | Afar Region A Level or I   | 0 | 120 | N | Fail        |
| 560707 | M | Sidamo Region HE Qualific  | 1 | 30  | N | Pass        |
| 560759 | M | South Region A Level or I  | 0 | 60  | N | Pass        |
| 560881 | M | South Region A Level or I  | 0 | 90  | Y | Fail        |
| 560921 | M | Sidamo Region HE Qualific  | 0 | 30  | N | Pass        |
| 560953 | M | Addis Ababa Lower Than     | 0 | 60  | N | Withdrawn   |
| 561208 | M | Addis Ababa A Level or I   | 1 | 60  | N | Pass        |
| 561413 | F | South West Lower Than      | 0 | 60  | N | Distinction |
| 563046 | M | Addis Ababa A Level or I   | 0 | 60  | N | Pass        |
| 563321 | M | South Region HE Qualific   | 0 | 60  | N | Pass        |
| 563534 | M | South West A Level or I    | 0 | 60  | N | Withdrawn   |

|        |   |                          |   |     |   |             |
|--------|---|--------------------------|---|-----|---|-------------|
| 564445 | M | Somalia Re HE Qualific   | 0 | 60  | N | Pass        |
| 564562 | M | Tigrai Regi A Level or I | 0 | 60  | N | Withdrawn   |
| 564734 | M | Addis Abak Lower Than    | 0 | 60  | N | Pass        |
| 565275 | M | South Regi A Level or I  | 2 | 90  | N | Pass        |
| 565952 | F | South Regi A Level or I  | 0 | 60  | Y | Pass        |
| 566279 | M | Afar Regi A Level or I   | 1 | 90  | N | Pass        |
| 566428 | M | South Wes A Level or I   | 0 | 90  | N | Pass        |
| 567681 | M | Tigrai Regi Lower Than   | 0 | 90  | N | Withdrawn   |
| 567892 | M | Oromia Re A Level or I   | 1 | 60  | N | Fail        |
| 567926 | M | Afar Regi HE Qualific    | 0 | 120 | N | Withdrawn   |
| 569372 | M | Addis Abak HE Qualific   | 0 | 30  | N | Distinction |
| 569953 | F | Sidamo Re Lower Than     | 0 | 30  | N | Pass        |
| 570045 | M | Addis Abak A Level or I  | 0 | 60  | N | Pass        |
| 570273 | M | South Regi A Level or I  | 1 | 60  | N | Pass        |
| 570278 | M | Addis Abak A Level or I  | 0 | 90  | N | Withdrawn   |
| 570491 | M | South Regi A Level or I  | 0 | 90  | N | Pass        |
| 570954 | M | Afar Regi Lower Than     | 1 | 60  | Y | Withdrawn   |
| 572168 | M | South Regi HE Qualific   | 1 | 30  | N | Withdrawn   |
| 572599 | M | South Regi Lower Than    | 0 | 60  | Y | Pass        |
| 572659 | M | Sidamo Re Lower Than     | 1 | 60  | N | Withdrawn   |
| 573503 | M | Sidamo Re Lower Than     | 0 | 120 | N | Withdrawn   |
| 573600 | M | Afar Regi Lower Than     | 0 | 60  | N | Withdrawn   |
| 573922 | M | North Regi A Level or I  | 0 | 60  | N | Withdrawn   |
| 574565 | M | South Regi Lower Than    | 0 | 60  | N | Fail        |
| 575066 | M | South Wes A Level or I   | 0 | 90  | N | Fail        |
| 575411 | M | South Wes A Level or I   | 0 | 60  | N | Pass        |
| 575623 | M | Afar Regi Lower Than     | 0 | 60  | N | Distinction |
| 578469 | M | Amhara Re A Level or I   | 0 | 60  | N | Pass        |
| 579052 | M | North Regi A Level or I  | 0 | 60  | N | Pass        |
| 579283 | M | South Regi Lower Than    | 0 | 90  | N | Distinction |
| 580689 | M | Afar Regi HE Qualific    | 1 | 60  | Y | Fail        |
| 580798 | M | South Wes Lower Than     | 0 | 60  | N | Pass        |
| 581082 | M | Addis Abak A Level or I  | 0 | 60  | N | Pass        |
| 581238 | M | Sidamo Re Lower Than     | 0 | 60  | N | Pass        |
| 581851 | M | Afar Regi HE Qualific    | 1 | 30  | N | Pass        |
| 581887 | F | North Regi HE Qualific   | 0 | 30  | N | Pass        |
| 582094 | M | Tigrai Regi A Level or I | 1 | 30  | N | Pass        |
| 582340 | M | North Regi Lower Than    | 1 | 60  | N | Withdrawn   |
| 583288 | F | Sidamo Re A Level or I   | 0 | 120 | N | Withdrawn   |
| 583719 | M | Oromia Re A Level or I   | 0 | 60  | N | Distinction |
| 584514 | M | South Regi Lower Than    | 1 | 60  | N | Fail        |
| 584718 | M | South Wes Lower Than     | 0 | 60  | N | Fail        |
| 585643 | M | Amhara Re A Level or I   | 0 | 90  | N | Pass        |
| 585769 | F | Afar Regi Post Gradu     | 1 | 60  | N | Withdrawn   |
| 585852 | M | South Wes Lower Than     | 0 | 60  | N | Pass        |
| 586474 | M | Addis Abak A Level or I  | 0 | 30  | N | Pass        |
| 587008 | M | South Regi A Level or I  | 1 | 60  | N | Pass        |

|        |   |                          |   |     |   |             |
|--------|---|--------------------------|---|-----|---|-------------|
| 587122 | M | Afar Region Lower Tha    | 1 | 60  | N | Fail        |
| 587621 | F | Sidamo Re Lower Tha      | 1 | 60  | N | Fail        |
| 587793 | F | Amhara Re Lower Tha      | 0 | 90  | N | Distinction |
| 588058 | M | South Regi Lower Tha     | 0 | 180 | Y | Withdrawn   |
| 588474 | M | North Regi Lower Tha     | 0 | 90  | N | Pass        |
| 589856 | M | Addis Abak A Level or I  | 1 | 90  | N | Fail        |
| 590837 | M | Amhara Re Lower Tha      | 0 | 60  | N | Pass        |
| 591523 | M | South Regi A Level or I  | 0 | 150 | N | Pass        |
| 591761 | F | Afar Region HE Qualific  | 0 | 30  | N | Pass        |
| 592047 | F | South Regi HE Qualific   | 0 | 60  | N | Pass        |
| 592338 | F | South Regi A Level or I  | 0 | 60  | N | Pass        |
| 592843 | M | South Wes A Level or I   | 0 | 60  | N | Distinction |
| 592951 | F | Tigrai Regi Lower Tha    | 0 | 120 | N | Withdrawn   |
| 593038 | F | Addis Abak A Level or I  | 0 | 120 | N | Pass        |
| 593896 | M | Somalia Re Lower Tha     | 0 | 90  | N | Pass        |
| 594629 | M | South Regi Lower Tha     | 0 | 60  | N | Pass        |
| 596326 | M | Sidamo Re A Level or I   | 0 | 120 | N | Withdrawn   |
| 596423 | M | South Regi Lower Tha     | 1 | 60  | N | Withdrawn   |
| 596614 | M | South Regi Lower Tha     | 1 | 30  | N | Withdrawn   |
| 596855 | M | South Wes Lower Tha      | 0 | 60  | N | Withdrawn   |
| 597166 | M | Amhara Re HE Qualific    | 0 | 60  | N | Withdrawn   |
| 597252 | M | Addis Abak Lower Tha     | 0 | 120 | N | Withdrawn   |
| 597732 | M | Sidamo Re HE Qualific    | 0 | 30  | N | Pass        |
| 598573 | F | Afar Region A Level or I | 2 | 60  | N | Withdrawn   |
| 599059 | M | Afar Region Lower Tha    | 1 | 30  | N | Fail        |
| 599215 | F | Sidamo Re A Level or I   | 0 | 60  | N | Fail        |
| 599429 | M | Sidamo Re A Level or I   | 0 | 90  | N | Fail        |
| 600267 | M | Afar Region A Level or I | 0 | 90  | Y | Withdrawn   |
| 600766 | M | Afar Region A Level or I | 0 | 60  | N | Distinction |
| 600898 | M | South Regi A Level or I  | 0 | 90  | N | Withdrawn   |
| 601567 | M | Addis Abak Lower Tha     | 0 | 60  | N | Fail        |
| 601599 | M | Afar Region HE Qualific  | 0 | 60  | N | Fail        |
| 602150 | M | Sidamo Re A Level or I   | 2 | 30  | N | Withdrawn   |
| 602707 | M | Tigrai Regi A Level or I | 0 | 60  | N | Pass        |
| 602745 | M | Afar Region HE Qualific  | 0 | 30  | N | Withdrawn   |
| 602830 | M | South Regi HE Qualific   | 0 | 60  | N | Distinction |
| 603108 | M | Addis Abak A Level or I  | 0 | 120 | N | Pass        |
| 603179 | M | Oromia Re Lower Tha      | 2 | 60  | N | Pass        |
| 603700 | M | Sidamo Re Lower Tha      | 0 | 60  | N | Fail        |
| 604057 | F | Afar Region A Level or I | 0 | 120 | N | Distinction |
| 604875 | M | Tigrai Regi A Level or I | 1 | 30  | N | Withdrawn   |
| 605125 | M | South Regi Lower Tha     | 0 | 30  | N | Pass        |
| 605129 | M | South Regi A Level or I  | 0 | 60  | N | Pass        |
| 605294 | M | South Regi Lower Tha     | 0 | 90  | N | Distinction |
| 605541 | M | Addis Abak Lower Tha     | 0 | 60  | Y | Fail        |
| 605545 | M | Oromia Re Post Gradu     | 1 | 60  | N | Fail        |
| 605836 | M | South Wes Lower Tha      | 0 | 60  | N | Distinction |



|        |   |                          |   |     |   |             |
|--------|---|--------------------------|---|-----|---|-------------|
| 608488 | F | Somalia Re Lower Tha     | 0 | 60  | N | Pass        |
| 608669 | M | Afar Region A Level or I | 1 | 60  | N | Fail        |
| 608853 | M | South Regi A Level or I  | 1 | 90  | N | Pass        |
| 609605 | M | Tigrai Regi HE Qualific  | 1 | 60  | N | Fail        |
| 610275 | M | South Regi A Level or I  | 0 | 60  | N | Pass        |
| 610287 | M | Addis Abak HE Qualific   | 1 | 60  | N | Pass        |
| 610373 | F | Afar Region HE Qualific  | 0 | 60  | N | Distinction |
| 610672 | M | Addis Abak A Level or I  | 0 | 60  | N | Pass        |
| 610904 | M | South Wes A Level or I   | 0 | 60  | N | Pass        |
| 611162 | F | South Wes Lower Tha      | 0 | 120 | N | Pass        |
| 611405 | M | South Regi Lower Tha     | 1 | 30  | N | Distinction |
| 611961 | M | Sidamo Re Lower Tha      | 0 | 60  | N | Pass        |
| 611971 | M | Amhara Re A Level or I   | 1 | 60  | N | Withdrawn   |
| 612157 | M | Amhara Re Lower Tha      | 0 | 60  | N | Fail        |
| 613644 | M | South Wes A Level or I   | 0 | 60  | N | Fail        |
| 613953 | M | Amhara Re A Level or I   | 0 | 30  | N | Pass        |
| 614181 | M | Amhara Re HE Qualific    | 0 | 30  | N | Pass        |
| 614300 | M | Somalia Re A Level or I  | 0 | 60  | N | Pass        |
| 614737 | M | South Wes A Level or I   | 0 | 60  | N | Fail        |
| 615429 | M | North Regi HE Qualific   | 0 | 60  | N | Withdrawn   |
| 616407 | M | Tigrai Regi Lower Tha    | 1 | 60  | N | Fail        |
| 617309 | M | Tigrai Regi A Level or I | 1 | 60  | N | Fail        |
| 617888 | M | Somalia Re A Level or I  | 0 | 60  | N | Pass        |
| 619168 | M | Afar Region A Level or I | 0 | 60  | N | Pass        |
| 620343 | M | Tigrai Regi A Level or I | 0 | 60  | N | Distinction |
| 620519 | M | Afar Region Post Gradu   | 0 | 60  | N | Pass        |
| 620536 | M | South Wes A Level or I   | 0 | 30  | N | Withdrawn   |
| 620782 | M | South Regi A Level or I  | 0 | 150 | N | Pass        |
| 621380 | M | South Regi Lower Tha     | 0 | 90  | N | Pass        |
| 622129 | F | Afar Region HE Qualific  | 0 | 60  | N | Pass        |
| 622315 | M | North Regi Lower Tha     | 1 | 30  | N | Fail        |
| 622890 | M | Amhara Re A Level or I   | 0 | 60  | N | Withdrawn   |
| 623002 | M | South Regi Lower Tha     | 0 | 60  | Y | Fail        |
| 623467 | M | Addis Abak Lower Tha     | 0 | 150 | N | Pass        |
| 623757 | F | South Regi A Level or I  | 0 | 120 | N | Withdrawn   |
| 623889 | M | South Regi A Level or I  | 0 | 30  | Y | Pass        |
| 623989 | M | Afar Region A Level or I | 0 | 30  | N | Distinction |
| 624126 | M | South Regi Lower Tha     | 1 | 90  | N | Fail        |
| 624222 | M | North Regi Lower Tha     | 0 | 90  | N | Distinction |
| 625288 | M | Somalia Re A Level or I  | 0 | 120 | N | Withdrawn   |
| 625614 | M | North Regi Lower Tha     | 0 | 30  | N | Pass        |
| 625785 | M | Afar Region A Level or I | 1 | 60  | N | Pass        |
| 625797 | M | North Regi Lower Tha     | 0 | 90  | N | Fail        |
| 626998 | M | Sidamo Re HE Qualific    | 1 | 30  | N | Pass        |
| 627283 | M | Amhara Re A Level or I   | 0 | 120 | N | Pass        |
| 627312 | M | North Regi HE Qualific   | 1 | 60  | N | Pass        |
| 627457 | M | South Wes A Level or I   | 0 | 60  | N | Withdrawn   |

|        |   |                         |   |     |   |             |
|--------|---|-------------------------|---|-----|---|-------------|
| 627500 | M | South Regi Lower Tha    | 1 | 60  | N | Fail        |
| 627935 | F | Somalia Re A Level or I | 0 | 90  | N | Withdrawn   |
| 628054 | M | Somalia Re Lower Tha    | 1 | 150 | N | Pass        |
| 628366 | M | Afar Regio Lower Tha    | 1 | 30  | N | Withdrawn   |
| 628480 | M | South Regi Lower Tha    | 0 | 90  | N | Pass        |
| 628717 | M | Sidamo Re A Level or I  | 0 | 180 | N | Withdrawn   |
| 628741 | M | South Wes Lower Tha     | 0 | 30  | N | Pass        |
| 628766 | M | South Wes Lower Tha     | 0 | 60  | N | Pass        |
| 629014 | F | Oromia Re Lower Tha     | 0 | 90  | N | Pass        |
| 629101 | M | South Wes Lower Tha     | 0 | 30  | N | Pass        |
| 629400 | M | Afar Regio A Level or I | 0 | 90  | N | Pass        |
| 629421 | M | Addis Abak HE Qualific  | 1 | 120 | N | Withdrawn   |
| 629535 | M | Somalia Re HE Qualific  | 0 | 60  | N | Pass        |
| 629642 | M | North Regi Lower Tha    | 0 | 90  | N | Pass        |
| 629852 | M | Oromia Re A Level or I  | 0 | 60  | N | Withdrawn   |
| 629862 | M | South Regi Lower Tha    | 0 | 30  | N | Pass        |
| 630105 | M | Afar Regio Lower Tha    | 0 | 90  | N | Pass        |
| 630106 | M | Addis Abak A Level or I | 0 | 90  | N | Pass        |
| 630519 | M | Somalia Re HE Qualific  | 0 | 60  | N | Pass        |
| 630541 | M | Amhara Re Lower Tha     | 0 | 90  | N | Distinction |
| 631113 | M | Afar Regio HE Qualific  | 0 | 60  | N | Pass        |
| 631807 | M | Somalia Re HE Qualific  | 1 | 30  | N | Fail        |
| 631888 | M | North Regi Lower Tha    | 0 | 30  | Y | Withdrawn   |
| 632626 | M | Oromia Re A Level or I  | 0 | 90  | N | Distinction |
| 632635 | F | Afar Regio Lower Tha    | 0 | 60  | N | Pass        |
| 632950 | M | North Regi A Level or I | 0 | 30  | N | Distinction |
| 633824 | M | Somalia Re A Level or I | 0 | 60  | Y | Distinction |
| 633868 | M | Tigrai Regi Lower Tha   | 0 | 60  | N | Fail        |
| 633914 | F | Somalia Re A Level or I | 0 | 60  | N | Pass        |
| 633995 | M | Sidamo Re A Level or I  | 0 | 90  | N | Fail        |
| 634094 | F | South Regi A Level or I | 0 | 60  | N | Pass        |
| 634367 | M | South Regi A Level or I | 1 | 30  | N | Pass        |
| 634552 | M | Oromia Re A Level or I  | 0 | 60  | N | Pass        |
| 634655 | M | Sidamo Re HE Qualific   | 0 | 60  | N | Withdrawn   |
| 634721 | M | Afar Regio A Level or I | 0 | 60  | N | Pass        |
| 634776 | M | Somalia Re A Level or I | 0 | 90  | N | Pass        |
| 634879 | M | Sidamo Re A Level or I  | 0 | 90  | N | Pass        |
| 634940 | M | Oromia Re A Level or I  | 0 | 60  | N | Distinction |
| 634957 | M | Sidamo Re Lower Tha     | 0 | 60  | N | Withdrawn   |
| 635325 | M | Addis Abak Lower Tha    | 0 | 30  | N | Pass        |
| 635552 | M | South Regi Lower Tha    | 0 | 60  | N | Fail        |
| 635564 | M | Amhara Re Lower Tha     | 0 | 60  | N | Pass        |
| 635720 | M | South Wes A Level or I  | 0 | 30  | N | Pass        |
| 635953 | M | Addis Abak A Level or I | 0 | 60  | N | Distinction |
| 636124 | M | Somalia Re Post Gradu   | 0 | 60  | N | Distinction |
| 636443 | M | North Regi A Level or I | 0 | 90  | N | Pass        |
| 636467 | M | Sidamo Re A Level or I  | 0 | 60  | N | Pass        |

|        |   |               |              |   |     |   |             |
|--------|---|---------------|--------------|---|-----|---|-------------|
| 636996 | M | Afar Region   | A Level or I | 0 | 90  | Y | Pass        |
| 637123 | M | Tigray Region | A Level or I | 0 | 60  | N | Pass        |
| 637292 | M | Afar Region   | HE Qualific  | 0 | 60  | N | Withdrawn   |
| 637401 | M | South Region  | HE Qualific  | 0 | 60  | N | Pass        |
| 637528 | M | Sidamo Region | A Level or I | 0 | 60  | N | Fail        |
| 637601 | M | Sidamo Region | HE Qualific  | 0 | 60  | N | Withdrawn   |
| 637624 | M | Afar Region   | HE Qualific  | 0 | 150 | N | Pass        |
| 637846 | M | Afar Region   | A Level or I | 0 | 30  | N | Withdrawn   |
| 638018 | M | South Region  | A Level or I | 0 | 60  | N | Distinction |
| 638257 | M | Addis Ababa   | A Level or I | 0 | 60  | N | Fail        |
| 638604 | M | Afar Region   | Lower Than   | 0 | 90  | N | Pass        |
| 638970 | M | Addis Ababa   | A Level or I | 0 | 60  | N | Pass        |
| 639012 | F | Amhara Region | A Level or I | 0 | 150 | N | Pass        |
| 639194 | M | Afar Region   | A Level or I | 0 | 120 | N | Distinction |
| 639232 | M | Sidamo Region | A Level or I | 0 | 120 | N | Withdrawn   |
| 639243 | M | Sidamo Region | A Level or I | 0 | 60  | N | Fail        |
| 639253 | F | South Region  | HE Qualific  | 0 | 60  | N | Distinction |
| 640109 | M | Sidamo Region | No Formal    | 0 | 90  | N | Fail        |
| 640307 | M | Afar Region   | Lower Than   | 0 | 60  | N | Fail        |
| 640439 | M | South West    | A Level or I | 0 | 60  | N | Pass        |
| 640443 | M | South Region  | A Level or I | 0 | 120 | Y | Withdrawn   |
| 640658 | F | South West    | A Level or I | 0 | 90  | N | Withdrawn   |
| 641116 | M | South Region  | Lower Than   | 0 | 60  | N | Pass        |
| 641195 | M | Oromia Region | Lower Than   | 0 | 60  | N | Fail        |
| 641200 | M | Afar Region   | HE Qualific  | 0 | 60  | N | Distinction |
| 641566 | M | South Region  | Lower Than   | 0 | 60  | N | Distinction |
| 641569 | M | Afar Region   | Lower Than   | 0 | 120 | N | Distinction |
| 641629 | M | South West    | A Level or I | 0 | 60  | N | Fail        |
| 641716 | M | Tigray Region | Lower Than   | 0 | 90  | Y | Withdrawn   |
| 641817 | M | Afar Region   | A Level or I | 0 | 60  | Y | Withdrawn   |
| 641881 | M | Sidamo Region | Lower Than   | 0 | 60  | Y | Fail        |
| 641899 | M | South West    | Lower Than   | 0 | 30  | N | Pass        |
| 642066 | M | South West    | A Level or I | 0 | 90  | N | Fail        |
| 642342 | M | Tigray Region | A Level or I | 0 | 60  | N | Distinction |
| 642396 | M | South West    | A Level or I | 0 | 60  | N | Withdrawn   |
| 642512 | M | South West    | A Level or I | 0 | 90  | N | Withdrawn   |
| 642591 | M | Addis Ababa   | Lower Than   | 0 | 60  | N | Distinction |
| 642627 | M | Sidamo Region | A Level or I | 0 | 90  | N | Fail        |
| 642656 | M | South West    | A Level or I | 0 | 60  | N | Distinction |
| 642839 | F | South Region  | Lower Than   | 0 | 150 | N | Fail        |
| 643077 | M | Sidamo Region | A Level or I | 0 | 60  | N | Pass        |
| 643118 | M | South Region  | HE Qualific  | 0 | 60  | N | Distinction |
| 643168 | M | Amhara Region | A Level or I | 0 | 120 | N | Pass        |
| 643200 | M | Amhara Region | Lower Than   | 0 | 90  | N | Withdrawn   |
| 643267 | M | Tigray Region | A Level or I | 0 | 60  | N | Pass        |
| 643269 | F | South Region  | HE Qualific  | 0 | 120 | N | Withdrawn   |
| 643270 | M | South Region  | Lower Than   | 0 | 60  | N | Pass        |

|        |   |                            |   |     |   |             |
|--------|---|----------------------------|---|-----|---|-------------|
| 643309 | M | Addis Abat A Level or I    | 0 | 120 | N | Withdrawn   |
| 643404 | F | Afar Region HE Qualific    | 0 | 60  | N | Fail        |
| 643416 | M | Addis Abat A Level or I    | 0 | 90  | N | Fail        |
| 643434 | M | Sidamo Re HE Qualific      | 0 | 60  | Y | Pass        |
| 643457 | M | Addis Abat Lower Than      | 0 | 60  | N | Pass        |
| 643481 | M | Amhara Re Lower Than       | 0 | 90  | N | Fail        |
| 643484 | F | Afar Region HE Qualific    | 0 | 60  | N | Pass        |
| 643510 | M | Tigray Region A Level or I | 0 | 60  | N | Pass        |
| 643514 | M | Somalia Re A Level or I    | 0 | 90  | N | Distinction |
| 643531 | M | Sidamo Re Lower Than       | 0 | 60  | N | Pass        |
| 643644 | M | Amhara Re Lower Than       | 0 | 60  | N | Fail        |
| 643705 | M | Somalia Re A Level or I    | 0 | 90  | N | Pass        |
| 643755 | M | South Region Lower Than    | 0 | 60  | N | Withdrawn   |
| 643770 | M | Afar Region HE Qualific    | 0 | 90  | N | Fail        |
| 643771 | M | Afar Region A Level or I   | 0 | 60  | N | Distinction |
| 644064 | F | South Region HE Qualific   | 0 | 60  | N | Withdrawn   |
| 644072 | F | Tigray Region Lower Than   | 0 | 30  | N | Fail        |
| 644113 | M | Somalia Re A Level or I    | 0 | 60  | N | Distinction |
| 644163 | M | Tigray Region A Level or I | 0 | 60  | N | Withdrawn   |
| 644246 | M | Sidamo Re A Level or I     | 0 | 60  | N | Distinction |
| 644480 | F | Sidamo Re A Level or I     | 0 | 120 | N | Pass        |
| 644514 | M | North Region HE Qualific   | 0 | 60  | N | Pass        |
| 644742 | M | South Region A Level or I  | 0 | 60  | N | Pass        |
| 644794 | F | South West Lower Than      | 0 | 60  | Y | Pass        |
| 644905 | M | Oromia Re HE Qualific      | 0 | 120 | N | Withdrawn   |
| 645045 | M | Sidamo Re HE Qualific      | 0 | 90  | N | Withdrawn   |
| 645126 | M | Somalia Re HE Qualific     | 0 | 60  | N | Distinction |
| 645151 | M | South Region Lower Than    | 0 | 60  | N | Withdrawn   |
| 645170 | M | South Region A Level or I  | 0 | 60  | N | Pass        |
| 645319 | M | Afar Region Lower Than     | 0 | 60  | N | Pass        |
| 645451 | M | Sidamo Re Lower Than       | 0 | 90  | N | Pass        |
| 645462 | M | South Region A Level or I  | 0 | 90  | N | Withdrawn   |
| 645481 | M | South Region Lower Than    | 0 | 60  | Y | Withdrawn   |
| 645542 | M | South Region Lower Than    | 0 | 60  | N | Pass        |
| 645557 | M | South Region Lower Than    | 0 | 90  | N | Withdrawn   |
| 645831 | M | Tigray Region Lower Than   | 0 | 60  | N | Distinction |
| 645847 | M | South West HE Qualific     | 0 | 90  | N | Withdrawn   |
| 645867 | M | Afar Region HE Qualific    | 0 | 120 | N | Withdrawn   |
| 645889 | M | Afar Region A Level or I   | 0 | 60  | N | Pass        |
| 646005 | M | Amhara Re A Level or I     | 0 | 60  | N | Distinction |
| 646040 | M | South Region A Level or I  | 0 | 90  | N | Pass        |
| 646070 | M | Amhara Re A Level or I     | 0 | 60  | N | Pass        |
| 646071 | M | Afar Region Post Gradu     | 0 | 60  | N | Pass        |
| 646097 | F | Afar Region HE Qualific    | 0 | 60  | N | Withdrawn   |
| 646109 | M | Amhara Re HE Qualific      | 0 | 60  | N | Withdrawn   |
| 646184 | M | South Region A Level or I  | 0 | 90  | N | Pass        |
| 646197 | M | Afar Region Post Gradu     | 0 | 60  | N | Distinction |

|        |   |                           |   |     |   |             |
|--------|---|---------------------------|---|-----|---|-------------|
| 646218 | F | Somalia Re A Level or I   | 0 | 60  | N | Withdrawn   |
| 646361 | M | Amhara Re HE Qualific     | 0 | 60  | N | Pass        |
| 646363 | M | Addis Abak HE Qualific    | 0 | 60  | N | Fail        |
| 646459 | M | Sidamo Re HE Qualific     | 0 | 150 | N | Withdrawn   |
| 646502 | M | Sidamo Re A Level or I    | 0 | 60  | N | Pass        |
| 646520 | M | Afar Regio A Level or I   | 0 | 60  | Y | Pass        |
| 646547 | M | Amhara Re Lower Than      | 0 | 90  | N | Fail        |
| 646581 | M | Tigrai Regio Lower Than   | 0 | 30  | N | Fail        |
| 646722 | M | South Regi Lower Than     | 0 | 60  | N | Withdrawn   |
| 646747 | F | Somalia Re A Level or I   | 0 | 60  | N | Withdrawn   |
| 646815 | M | Somalia Re Lower Than     | 0 | 60  | N | Fail        |
| 646841 | M | Amhara Re Lower Than      | 0 | 60  | N | Fail        |
| 646903 | M | Amhara Re Lower Than      | 0 | 60  | N | Pass        |
| 646998 | M | Somalia Re A Level or I   | 0 | 60  | N | Pass        |
| 647043 | M | Amhara Re Lower Than      | 0 | 60  | N | Fail        |
| 647083 | M | Sidamo Re A Level or I    | 0 | 180 | N | Pass        |
| 647148 | M | Afar Regio A Level or I   | 0 | 120 | N | Pass        |
| 647179 | M | Sidamo Re A Level or I    | 0 | 60  | N | Fail        |
| 647184 | M | Sidamo Re Lower Than      | 0 | 120 | N | Withdrawn   |
| 647217 | M | Tigrai Regio A Level or I | 0 | 120 | N | Withdrawn   |
| 647358 | M | Afar Regio A Level or I   | 0 | 30  | N | Fail        |
| 647405 | F | South Wes A Level or I    | 0 | 60  | Y | Withdrawn   |
| 647432 | F | Tigrai Regio A Level or I | 0 | 60  | N | Withdrawn   |
| 647466 | F | North Regi HE Qualific    | 0 | 60  | N | Pass        |
| 647518 | M | Tigrai Regio A Level or I | 0 | 120 | N | Withdrawn   |
| 647645 | M | Addis Abak A Level or I   | 0 | 90  | N | Pass        |
| 647791 | M | South Regi No Formal      | 0 | 30  | N | Withdrawn   |
| 647865 | M | Addis Abak A Level or I   | 0 | 60  | N | Pass        |
| 647887 | F | Sidamo Re No Formal       | 0 | 60  | N | Withdrawn   |
| 647888 | M | Oromia Re A Level or I    | 0 | 60  | N | Distinction |
| 647916 | M | North Regi A Level or I   | 0 | 60  | N | Pass        |
| 647919 | M | Somalia Re Lower Than     | 0 | 60  | N | Pass        |
| 647983 | M | Amhara Re Lower Than      | 0 | 60  | N | Pass        |
| 647988 | F | Somalia Re A Level or I   | 0 | 60  | N | Pass        |
| 648001 | M | Sidamo Re Lower Than      | 0 | 60  | N | Distinction |
| 648058 | M | Somalia Re Lower Than     | 0 | 60  | N | Withdrawn   |
| 648090 | F | South Regi A Level or I   | 0 | 60  | N | Pass        |
| 648091 | M | North Regi A Level or I   | 0 | 60  | N | Pass        |
| 648136 | M | South Wes Lower Than      | 0 | 60  | N | Pass        |
| 648250 | F | Sidamo Re HE Qualific     | 0 | 90  | N | Withdrawn   |
| 648285 | M | South Wes A Level or I    | 0 | 60  | N | Distinction |
| 648354 | F | Amhara Re A Level or I    | 0 | 120 | N | Pass        |
| 648369 | M | Tigrai Regio HE Qualific  | 0 | 60  | N | Pass        |
| 648370 | M | Oromia Re A Level or I    | 0 | 60  | N | Pass        |
| 648422 | M | South Regi Lower Than     | 0 | 60  | N | Pass        |
| 648429 | M | South Regi HE Qualific    | 0 | 60  | N | Withdrawn   |
| 648436 | M | Oromia Re HE Qualific     | 0 | 60  | N | Pass        |

|        |   |                            |   |     |   |             |
|--------|---|----------------------------|---|-----|---|-------------|
| 648440 | M | Somalia Re A Level or I    | 0 | 120 | N | Withdrawn   |
| 648469 | M | Addis Abak A Level or I    | 0 | 30  | N | Distinction |
| 648518 | F | Afar Region A Level or I   | 0 | 180 | N | Fail        |
| 648652 | M | Tigray Region Lower Than   | 0 | 120 | N | Withdrawn   |
| 648654 | M | South Region Lower Than    | 0 | 60  | N | Pass        |
| 648687 | M | Tigray Region A Level or I | 0 | 60  | N | Distinction |
| 648787 | M | South Region Lower Than    | 0 | 60  | N | Pass        |
| 648834 | M | Afar Region HE Qualific    | 0 | 60  | N | Withdrawn   |
| 648843 | M | North Region A Level or I  | 0 | 60  | N | Pass        |
| 648852 | M | North Region Lower Than    | 0 | 60  | N | Withdrawn   |
| 648902 | M | South Wes A Level or I     | 0 | 60  | Y | Pass        |
| 648942 | M | Oromia Re A Level or I     | 0 | 60  | N | Pass        |
| 649001 | M | Sidamo Re Lower Than       | 0 | 60  | N | Withdrawn   |
| 649069 | M | South Wes A Level or I     | 0 | 60  | N | Pass        |
| 649171 | M | Amhara Re A Level or I     | 0 | 60  | N | Pass        |
| 649200 | M | North Region A Level or I  | 0 | 90  | N | Withdrawn   |
| 649215 | M | Sidamo Re Lower Than       | 0 | 90  | N | Fail        |
| 649230 | F | Afar Region Lower Than     | 0 | 180 | N | Withdrawn   |
| 649248 | F | Sidamo Re Lower Than       | 0 | 90  | N | Withdrawn   |
| 649255 | M | Sidamo Re HE Qualific      | 0 | 60  | N | Distinction |
| 649310 | M | South Wes A Level or I     | 0 | 60  | N | Fail        |
| 649332 | M | South Region HE Qualific   | 0 | 60  | N | Withdrawn   |
| 649339 | M | South Region A Level or I  | 0 | 60  | N | Distinction |
| 649343 | M | Somalia Re A Level or I    | 0 | 90  | N | Pass        |
| 649506 | M | Afar Region A Level or I   | 0 | 90  | N | Fail        |
| 649637 | M | Afar Region HE Qualific    | 0 | 60  | N | Distinction |
| 649667 | M | Amhara Re A Level or I     | 0 | 60  | N | Pass        |
| 649701 | M | Sidamo Re Lower Than       | 0 | 120 | N | Withdrawn   |
| 649713 | M | Afar Region A Level or I   | 0 | 60  | N | Distinction |
| 649718 | M | Amhara Re Lower Than       | 0 | 60  | N | Distinction |
| 649720 | M | Tigray Region A Level or I | 0 | 120 | N | Withdrawn   |
| 649738 | M | Addis Abak HE Qualific     | 0 | 60  | N | Pass        |
| 649755 | M | South Wes Lower Than       | 0 | 60  | N | Withdrawn   |
| 649783 | M | Sidamo Re A Level or I     | 0 | 120 | N | Withdrawn   |
| 649840 | M | South Region Lower Than    | 0 | 90  | N | Withdrawn   |
| 649843 | M | Sidamo Re A Level or I     | 0 | 60  | N | Pass        |
| 649861 | M | Amhara Re Lower Than       | 0 | 30  | N | Withdrawn   |
| 649863 | M | Oromia Re Lower Than       | 0 | 60  | N | Withdrawn   |
| 649935 | M | South Region A Level or I  | 0 | 60  | N | Fail        |
| 649943 | M | Amhara Re A Level or I     | 0 | 30  | N | Pass        |
| 650027 | M | Addis Abak Lower Than      | 0 | 60  | N | Distinction |
| 650105 | M | Afar Region Lower Than     | 0 | 60  | N | Fail        |
| 650137 | M | Sidamo Re A Level or I     | 0 | 60  | N | Withdrawn   |
| 650145 | M | Tigray Region Lower Than   | 0 | 60  | N | Fail        |
| 650164 | M | Afar Region HE Qualific    | 0 | 30  | N | Pass        |
| 650192 | M | North Region Lower Than    | 0 | 30  | N | Withdrawn   |
| 650223 | M | Sidamo Re Lower Than       | 0 | 120 | N | Withdrawn   |

|        |   |                          |   |     |   |             |
|--------|---|--------------------------|---|-----|---|-------------|
| 650330 | M | South Wes Lower Tha      | 0 | 60  | N | Distinction |
| 650334 | M | South Wes Lower Tha      | 0 | 60  | N | Withdrawn   |
| 650341 | F | Sidamo Re A Level or I   | 0 | 150 | N | Pass        |
| 650384 | M | Addis Abak Lower Tha     | 0 | 30  | N | Withdrawn   |
| 650471 | M | Somalia Re A Level or I  | 0 | 60  | N | Pass        |
| 650504 | M | Afar Regio A Level or I  | 0 | 40  | N | Distinction |
| 650533 | M | Somalia Re A Level or I  | 0 | 30  | N | Pass        |
| 650575 | M | Sidamo Re A Level or I   | 0 | 90  | N | Fail        |
| 650578 | M | Somalia Re Lower Tha     | 0 | 60  | Y | Withdrawn   |
| 650592 | M | South Regi Lower Tha     | 0 | 30  | N | Pass        |
| 650666 | M | Addis Abak A Level or I  | 0 | 60  | Y | Distinction |
| 650734 | M | Amhara Re A Level or I   | 0 | 60  | N | Pass        |
| 650752 | M | Somalia Re A Level or I  | 0 | 30  | N | Fail        |
| 650770 | M | South Regi A Level or I  | 0 | 60  | N | Distinction |
| 650816 | M | Tigrai Regi A Level or I | 0 | 60  | N | Pass        |
| 650849 | F | Afar Regio HE Qualific   | 0 | 60  | N | Withdrawn   |
| 650856 | M | Sidamo Re Lower Tha      | 0 | 120 | N | Distinction |
| 650926 | M | North Regi Lower Tha     | 0 | 60  | N | Pass        |
| 650927 | M | Afar Regio A Level or I  | 0 | 90  | N | Distinction |
| 650950 | M | Afar Regio HE Qualific   | 0 | 30  | N | Fail        |
| 650987 | M | Addis Abak A Level or I  | 0 | 60  | N | Pass        |
| 651015 | M | Oromia Re A Level or I   | 0 | 30  | N | Pass        |
| 651086 | M | South Regi Lower Tha     | 0 | 120 | N | Withdrawn   |
| 651155 | M | Addis Abak Lower Tha     | 0 | 60  | N | Distinction |
| 651156 | M | Sidamo Re A Level or I   | 0 | 120 | N | Withdrawn   |
| 651191 | M | Sidamo Re A Level or I   | 0 | 60  | N | Withdrawn   |
| 651245 | M | Afar Regio Lower Tha     | 0 | 60  | N | Pass        |
| 651298 | M | Amhara Re HE Qualific    | 0 | 60  | N | Withdrawn   |
| 651337 | M | Amhara Re A Level or I   | 0 | 60  | N | Pass        |
| 651361 | M | South Wes Lower Tha      | 0 | 120 | N | Withdrawn   |
| 651371 | M | South Regi A Level or I  | 0 | 60  | N | Withdrawn   |
| 651384 | M | South Regi A Level or I  | 0 | 60  | N | Withdrawn   |
| 651533 | M | South Regi Lower Tha     | 0 | 60  | N | Distinction |
| 651534 | M | Afar Regio HE Qualific   | 0 | 30  | N | Pass        |
| 651616 | M | South Regi Lower Tha     | 0 | 120 | N | Withdrawn   |
| 651635 | M | South Regi A Level or I  | 0 | 60  | Y | Pass        |
| 651648 | M | Amhara Re A Level or I   | 0 | 60  | N | Pass        |
| 651734 | M | Oromia Re Lower Tha      | 0 | 120 | N | Fail        |
| 651766 | M | Addis Abak Lower Tha     | 0 | 60  | N | Pass        |
| 651828 | M | Afar Regio HE Qualific   | 0 | 60  | N | Distinction |
| 651839 | M | North Regi A Level or I  | 0 | 120 | N | Withdrawn   |
| 651850 | M | Addis Abak A Level or I  | 0 | 90  | N | Pass        |
| 651915 | M | Tigrai Regi A Level or I | 0 | 90  | N | Withdrawn   |
| 651930 | M | South Wes Lower Tha      | 0 | 30  | N | Distinction |
| 651933 | M | Somalia Re A Level or I  | 0 | 120 | N | Pass        |
| 651935 | F | South Regi A Level or I  | 0 | 120 | N | Pass        |
| 651950 | M | Amhara Re Lower Tha      | 0 | 60  | N | Pass        |

|        |   |                          |   |     |   |             |
|--------|---|--------------------------|---|-----|---|-------------|
| 651995 | M | South Regi A Level or I  | 0 | 90  | N | Distinction |
| 652054 | M | Oromia Re HE Qualific    | 0 | 60  | N | Pass        |
| 652233 | M | Sidamo Re HE Qualific    | 0 | 30  | N | Withdrawn   |
| 652285 | M | North Regi HE Qualific   | 0 | 60  | N | Distinction |
| 652287 | M | North Regi Post Gradu    | 0 | 60  | N | Withdrawn   |
| 652302 | M | Afar Regio HE Qualific   | 0 | 60  | N | Pass        |
| 652442 | M | Somalia Re A Level or I  | 0 | 60  | N | Fail        |
| 652460 | M | Afar Regio A Level or I  | 0 | 30  | N | Pass        |
| 652476 | F | Afar Regio HE Qualific   | 0 | 120 | N | Pass        |
| 652501 | M | South Wes A Level or I   | 0 | 120 | N | Pass        |
| 652571 | M | Sidamo Re A Level or I   | 0 | 60  | N | Withdrawn   |
| 652606 | M | North Regi Lower Thar    | 0 | 90  | N | Withdrawn   |
| 652667 | M | Sidamo Re Lower Thar     | 0 | 120 | N | Withdrawn   |
| 652861 | M | Afar Regio HE Qualific   | 0 | 60  | N | Pass        |
| 652880 | F | Afar Regio HE Qualific   | 0 | 60  | N | Pass        |
| 652894 | M | North Regi A Level or I  | 0 | 60  | N | Fail        |
| 652902 | M | Sidamo Re HE Qualific    | 0 | 120 | N | Distinction |
| 652971 | M | Oromia Re A Level or I   | 0 | 90  | N | Distinction |
| 653090 | M | Afar Regio Lower Thar    | 0 | 60  | N | Fail        |
| 653168 | M | South Regi Lower Thar    | 0 | 120 | N | Withdrawn   |
| 653177 | F | South Regi HE Qualific   | 0 | 90  | N | Withdrawn   |
| 653210 | M | South Wes A Level or I   | 0 | 60  | N | Pass        |
| 653248 | M | Oromia Re Lower Thar     | 0 | 60  | N | Withdrawn   |
| 653326 | M | Afar Regio Lower Thar    | 0 | 30  | N | Fail        |
| 653352 | M | Oromia Re A Level or I   | 0 | 90  | N | Pass        |
| 653360 | M | Amhara Re HE Qualific    | 0 | 120 | N | Withdrawn   |
| 653440 | M | Amhara Re Lower Thar     | 0 | 60  | N | Pass        |
| 653506 | M | Oromia Re Lower Thar     | 0 | 90  | N | Fail        |
| 653587 | M | Somalia Re Lower Thar    | 0 | 60  | N | Distinction |
| 653608 | M | Amhara Re Lower Thar     | 0 | 120 | N | Fail        |
| 653661 | M | Oromia Re Lower Thar     | 0 | 30  | N | Fail        |
| 653665 | M | Amhara Re A Level or I   | 0 | 30  | N | Pass        |
| 653688 | M | Amhara Re A Level or I   | 0 | 60  | N | Pass        |
| 653718 | M | Afar Regio A Level or I  | 0 | 60  | N | Distinction |
| 653801 | M | Amhara Re Lower Thar     | 0 | 60  | N | Pass        |
| 653887 | M | Afar Regio HE Qualific   | 0 | 60  | N | Pass        |
| 653998 | M | Afar Regio Lower Thar    | 0 | 60  | N | Pass        |
| 654031 | M | North Regi A Level or I  | 0 | 60  | Y | Pass        |
| 654095 | M | Addis Abak Lower Thar    | 0 | 120 | N | Fail        |
| 654125 | M | South Regi A Level or I  | 0 | 30  | N | Fail        |
| 654198 | M | South Regi Lower Thar    | 0 | 30  | N | Pass        |
| 654202 | M | Oromia Re A Level or I   | 0 | 60  | N | Withdrawn   |
| 654213 | M | South Regi A Level or I  | 0 | 60  | N | Pass        |
| 654240 | M | Amhara Re A Level or I   | 0 | 60  | N | Distinction |
| 654295 | F | South Wes A Level or I   | 0 | 90  | N | Withdrawn   |
| 654325 | M | Tigrai Regi A Level or I | 0 | 60  | N | Withdrawn   |
| 654397 | M | South Regi A Level or I  | 0 | 60  | N | Pass        |



|        |   |                         |   |     |   |             |
|--------|---|-------------------------|---|-----|---|-------------|
| 654464 | M | Amhara Re Lower Than    | 0 | 60  | N | Withdrawn   |
| 654485 | F | South Wes A Level or    | 0 | 60  | N | Pass        |
| 654547 | M | Sidamo Re HE Qualific   | 0 | 60  | N | Pass        |
| 654570 | M | Addis Abak Lower Than   | 0 | 60  | N | Withdrawn   |
| 654579 | F | Afar Region A Level or  | 0 | 60  | N | Withdrawn   |
| 654668 | M | Sidamo Re Lower Than    | 0 | 60  | N | Pass        |
| 654676 | M | Amhara Re A Level or    | 0 | 60  | N | Pass        |
| 654755 | M | Sidamo Re A Level or    | 0 | 60  | N | Withdrawn   |
| 654801 | M | Afar Region HE Qualific | 0 | 60  | N | Pass        |
| 654822 | M | North Regi A Level or   | 0 | 60  | N | Pass        |
| 654876 | M | Afar Region Lower Than  | 0 | 60  | N | Withdrawn   |
| 654888 | M | Somalia Re A Level or   | 0 | 90  | N | Withdrawn   |
| 654891 | M | South Regi Lower Than   | 0 | 30  | N | Pass        |
| 654925 | M | Afar Region Lower Than  | 0 | 60  | N | Fail        |
| 654933 | M | Somalia Re A Level or   | 0 | 90  | N | Withdrawn   |
| 655051 | M | South Regi A Level or   | 0 | 150 | N | Withdrawn   |
| 655242 | M | Tigrai Regi A Level or  | 0 | 60  | N | Distinction |
| 655383 | F | Oromia Re Lower Than    | 0 | 360 | N | Withdrawn   |
| 655396 | M | Afar Region HE Qualific | 0 | 60  | N | Pass        |
| 655468 | M | Afar Region Lower Than  | 0 | 120 | N | Fail        |
| 655484 | M | Addis Abak A Level or   | 0 | 90  | Y | Withdrawn   |
| 655498 | F | South Wes A Level or    | 0 | 120 | N | Distinction |
| 655558 | M | North Regi Lower Than   | 0 | 120 | N | Withdrawn   |
| 655609 | M | Amhara Re A Level or    | 0 | 60  | N | Pass        |
| 655634 | M | South Regi A Level or   | 0 | 60  | N | Withdrawn   |
| 655680 | M | Sidamo Re A Level or    | 0 | 60  | N | Distinction |
| 655764 | M | Afar Region HE Qualific | 0 | 60  | N | Pass        |
| 655794 | M | Oromia Re Lower Than    | 0 | 60  | N | Distinction |
| 655865 | M | Sidamo Re HE Qualific   | 0 | 60  | N | Pass        |
| 655869 | M | Afar Region HE Qualific | 0 | 60  | N | Distinction |
| 655924 | F | Sidamo Re HE Qualific   | 0 | 90  | N | Distinction |
| 655973 | M | Addis Abak A Level or   | 0 | 120 | N | Pass        |
| 656010 | M | Afar Region Lower Than  | 0 | 30  | N | Pass        |
| 656057 | M | Afar Region HE Qualific | 0 | 60  | N | Pass        |
| 656068 | M | Addis Abak Lower Than   | 0 | 120 | N | Fail        |
| 656134 | M | Oromia Re Lower Than    | 0 | 60  | N | Distinction |
| 656203 | M | Addis Abak A Level or   | 0 | 90  | N | Withdrawn   |
| 656347 | M | North Regi No Formal    | 0 | 60  | N | Pass        |
| 656446 | M | Amhara Re Lower Than    | 0 | 60  | N | Pass        |
| 656535 | M | South Regi A Level or   | 0 | 120 | N | Withdrawn   |
| 656553 | M | Amhara Re A Level or    | 0 | 60  | N | Fail        |
| 656578 | M | Afar Region A Level or  | 0 | 60  | N | Pass        |
| 656815 | M | Tigrai Regi Lower Than  | 0 | 60  | N | Pass        |
| 656825 | F | Addis Abak A Level or   | 0 | 120 | N | Withdrawn   |
| 656854 | M | Afar Region A Level or  | 0 | 60  | N | Pass        |
| 656906 | M | Afar Region A Level or  | 0 | 60  | N | Fail        |
| 656928 | M | Addis Abak Lower Than   | 0 | 120 | N | Withdrawn   |

|        |   |             |              |   |     |   |             |
|--------|---|-------------|--------------|---|-----|---|-------------|
| 656929 | F | Sidamo Re   | A Level or I | 0 | 210 | N | Fail        |
| 656954 | M | Amhara Re   | Lower Than   | 0 | 90  | N | Withdrawn   |
| 657002 | M | Afar Region | A Level or I | 0 | 60  | N | Distinction |
| 657062 | M | Addis Abab  | A Level or I | 0 | 60  | N | Pass        |
| 657091 | M | Addis Abab  | Lower Than   | 0 | 60  | N | Withdrawn   |
| 657128 | M | South Regi  | Lower Than   | 0 | 30  | N | Pass        |
| 657194 | M | South Wes   | HE Qualific  | 0 | 60  | N | Distinction |
| 657196 | M | North Regi  | A Level or I | 0 | 60  | N | Distinction |
| 657209 | F | South Wes   | A Level or I | 0 | 60  | N | Withdrawn   |
| 657210 | M | Afar Region | Lower Than   | 0 | 60  | N | Fail        |
| 657226 | M | Sidamo Re   | Lower Than   | 0 | 60  | N | Pass        |
| 657319 | M | Addis Abab  | Lower Than   | 0 | 180 | N | Pass        |
| 674253 | M | South Regi  | A Level or I | 0 | 30  | N | Pass        |
| 674296 | M | Addis Abab  | A Level or I | 0 | 30  | N | Withdrawn   |
| 674430 | M | Tigray Regi | A Level or I | 0 | 60  | Y | Pass        |
| 674457 | M | Tigray Regi | Lower Than   | 0 | 30  | N | Fail        |
| 674720 | M | Sidamo Re   | Lower Than   | 0 | 60  | N | Fail        |
| 674747 | M | South Wes   | Lower Than   | 0 | 90  | N | Fail        |
| 674808 | F | Afar Region | HE Qualific  | 0 | 60  | N | Pass        |
| 674853 | M | Afar Region | Lower Than   | 0 | 60  | N | Pass        |
| 674882 | M | Afar Region | A Level or I | 0 | 60  | N | Fail        |
| 674888 | M | Sidamo Re   | A Level or I | 0 | 60  | N | Withdrawn   |
| 674889 | M | Afar Region | A Level or I | 0 | 60  | N | Pass        |
| 674941 | M | Somalia Re  | A Level or I | 0 | 60  | N | Distinction |
| 674965 | M | North Regi  | A Level or I | 0 | 210 | N | Withdrawn   |
| 675104 | M | Amhara Re   | HE Qualific  | 0 | 90  | N | Withdrawn   |
| 675162 | M | Addis Abab  | A Level or I | 0 | 60  | N | Pass        |
| 675337 | M | Addis Abab  | Lower Than   | 0 | 90  | N | Withdrawn   |
| 675365 | M | South Regi  | A Level or I | 0 | 60  | N | Pass        |
| 675374 | M | South Regi  | HE Qualific  | 0 | 60  | N | Pass        |
| 675391 | M | Addis Abab  | A Level or I | 0 | 60  | Y | Withdrawn   |
| 675441 | M | Oromia Re   | HE Qualific  | 0 | 60  | N | Fail        |
| 675442 | M | North Regi  | Lower Than   | 0 | 60  | N | Fail        |
| 675450 | M | Tigray Regi | A Level or I | 0 | 90  | N | Distinction |
| 675495 | M | Amhara Re   | Lower Than   | 0 | 60  | N | Withdrawn   |
| 675537 | M | Afar Region | HE Qualific  | 0 | 60  | N | Pass        |
| 675663 | M | Afar Region | A Level or I | 0 | 30  | N | Fail        |
| 675773 | M | Sidamo Re   | A Level or I | 0 | 90  | N | Pass        |
| 675840 | M | South Regi  | A Level or I | 0 | 60  | N | Pass        |
| 675853 | M | South Regi  | Lower Than   | 0 | 90  | N | Withdrawn   |
| 675972 | M | South Regi  | Lower Than   | 0 | 90  | N | Withdrawn   |
| 676025 | M | South Regi  | Lower Than   | 0 | 60  | N | Withdrawn   |
| 676084 | M | Afar Region | HE Qualific  | 0 | 30  | N | Pass        |
| 676150 | M | Afar Region | A Level or I | 0 | 60  | N | Fail        |
| 676181 | M | North Regi  | Lower Than   | 0 | 120 | N | Withdrawn   |
| 676333 | M | Sidamo Re   | A Level or I | 0 | 60  | N | Distinction |
| 676482 | M | Afar Region | HE Qualific  | 0 | 60  | N | Distinction |

|        |   |                           |   |     |   |             |
|--------|---|---------------------------|---|-----|---|-------------|
| 676611 | M | Somalia Re Lower Than     | 0 | 60  | N | Pass        |
| 676676 | M | Tigray Region A Level or  | 0 | 30  | N | Pass        |
| 676722 | M | South Region A Level or   | 0 | 60  | N | Distinction |
| 676724 | M | Afar Region A Level or    | 0 | 30  | N | Pass        |
| 676805 | M | Afar Region A Level or    | 0 | 30  | N | Pass        |
| 676812 | M | Afar Region A Level or    | 0 | 30  | N | Fail        |
| 676834 | F | Afar Region A Level or    | 0 | 30  | N | Pass        |
| 677018 | M | Sidamo Region A Level or  | 0 | 120 | N | Pass        |
| 677040 | M | Sidamo Region Lower Than  | 0 | 60  | N | Pass        |
| 677049 | M | Afar Region A Level or    | 0 | 30  | N | Fail        |
| 677189 | F | Afar Region HE Qualific   | 0 | 60  | N | Pass        |
| 677197 | M | Afar Region Lower Than    | 0 | 60  | N | Fail        |
| 677232 | M | Amhara Region HE Qualific | 0 | 30  | N | Fail        |
| 677250 | F | Oromia Region Lower Than  | 0 | 60  | N | Withdrawn   |
| 677416 | M | North Region Lower Than   | 0 | 90  | N | Withdrawn   |
| 677457 | F | South Region A Level or   | 0 | 60  | N | Pass        |
| 677459 | M | Afar Region HE Qualific   | 0 | 120 | N | Pass        |
| 677507 | M | South Region Lower Than   | 0 | 90  | Y | Withdrawn   |
| 677631 | M | South Region A Level or   | 0 | 60  | N | Withdrawn   |
| 677711 | M | Afar Region A Level or    | 0 | 30  | Y | Fail        |
| 677721 | M | Afar Region A Level or    | 0 | 240 | N | Withdrawn   |
| 677741 | M | South Region A Level or   | 0 | 60  | N | Pass        |
| 677772 | F | South Region A Level or   | 0 | 60  | N | Withdrawn   |
| 677776 | F | Somalia Region A Level or | 0 | 60  | N | Withdrawn   |
| 677897 | F | Afar Region HE Qualific   | 0 | 150 | N | Pass        |
| 677900 | M | Afar Region A Level or    | 0 | 60  | N | Distinction |
| 677947 | M | Addis Ababa A Level or    | 0 | 60  | Y | Fail        |
| 678015 | M | South West A Level or     | 0 | 60  | N | Pass        |
| 678026 | F | Afar Region A Level or    | 0 | 60  | N | Pass        |
| 678194 | M | Tigray Region A Level or  | 0 | 60  | N | Distinction |
| 678267 | M | Somalia Region A Level or | 0 | 60  | N | Pass        |
| 678310 | M | Sidamo Region Lower Than  | 0 | 120 | N | Withdrawn   |
| 678341 | M | Addis Ababa A Level or    | 0 | 90  | N | Distinction |
| 678393 | M | Afar Region HE Qualific   | 0 | 60  | N | Fail        |
| 678419 | M | Addis Ababa HE Qualific   | 0 | 60  | N | Pass        |
| 678508 | F | South Region Lower Than   | 0 | 60  | N | Distinction |
| 678538 | M | Tigray Region Lower Than  | 0 | 90  | N | Pass        |
| 678613 | M | Afar Region Lower Than    | 0 | 60  | N | Withdrawn   |
| 678701 | F | Afar Region A Level or    | 0 | 30  | N | Pass        |
| 678715 | F | Sidamo Region A Level or  | 0 | 90  | N | Pass        |
| 678811 | F | North Region Lower Than   | 0 | 120 | N | Withdrawn   |
| 678852 | F | Afar Region Lower Than    | 0 | 30  | N | Withdrawn   |
| 678860 | M | Addis Ababa HE Qualific   | 0 | 60  | N | Withdrawn   |
| 678929 | M | South West Lower Than     | 0 | 90  | N | Distinction |
| 678970 | F | Afar Region A Level or    | 0 | 30  | N | Pass        |
| 679037 | M | Sidamo Region HE Qualific | 0 | 120 | N | Withdrawn   |
| 679114 | F | South Region A Level or   | 0 | 120 | N | Pass        |

|        |   |                          |   |     |   |             |
|--------|---|--------------------------|---|-----|---|-------------|
| 679207 | M | Amhara Re Lower Tha      | 0 | 90  | N | Pass        |
| 679431 | M | Sidamo Re, A Level or I  | 0 | 150 | N | Withdrawn   |
| 679539 | F | South Regi Lower Tha     | 0 | 60  | N | Withdrawn   |
| 679541 | M | Afar Regio HE Qualific   | 0 | 60  | N | Pass        |
| 679569 | M | Afar Regio HE Qualific   | 0 | 60  | N | Distinction |
| 679631 | M | North Regi Lower Tha     | 0 | 60  | N | Pass        |
| 679801 | M | Addis Abat A Level or I  | 0 | 60  | N | Pass        |
| 679883 | F | Oromia Re Lower Tha      | 0 | 60  | N | Withdrawn   |
| 680074 | F | Sidamo Re, Lower Tha     | 0 | 150 | N | Withdrawn   |
| 680133 | F | Afar Regio HE Qualific   | 0 | 60  | N | Distinction |
| 680267 | M | Afar Regio A Level or I  | 0 | 60  | N | Pass        |
| 680333 | M | North Regi HE Qualific   | 0 | 150 | N | Withdrawn   |
| 680442 | M | Afar Regio Lower Tha     | 0 | 120 | N | Withdrawn   |
| 680483 | M | Afar Regio Lower Tha     | 0 | 60  | N | Pass        |
| 680563 | M | Sidamo Re, Lower Tha     | 0 | 30  | N | Withdrawn   |
| 680614 | M | Afar Regio A Level or I  | 0 | 60  | N | Withdrawn   |
| 680644 | M | Oromia Re HE Qualific    | 0 | 60  | N | Pass        |
| 680678 | M | Sidamo Re, Lower Tha     | 0 | 30  | N | Withdrawn   |
| 680765 | F | Sidamo Re, Lower Tha     | 0 | 120 | N | Pass        |
| 680804 | M | South Wes HE Qualific    | 0 | 60  | N | Pass        |
| 680829 | F | North Regi A Level or I  | 0 | 60  | N | Withdrawn   |
| 680894 | M | Afar Regio HE Qualific   | 0 | 30  | N | Pass        |
| 681001 | F | Afar Regio HE Qualific   | 0 | 60  | Y | Distinction |
| 681095 | M | Afar Regio A Level or I  | 0 | 30  | N | Withdrawn   |
| 681200 | M | Tigrai Regi Lower Tha    | 0 | 60  | N | Pass        |
| 681302 | M | Amhara Re HE Qualific    | 0 | 60  | N | Pass        |
| 681327 | M | Afar Regio Lower Tha     | 0 | 60  | N | Pass        |
| 681369 | M | South Regi A Level or I  | 0 | 60  | N | Distinction |
| 681379 | F | Tigrai Regi Lower Tha    | 0 | 60  | N | Fail        |
| 681416 | F | Afar Regio A Level or I  | 0 | 90  | N | Pass        |
| 681759 | M | Oromia Re A Level or I   | 0 | 60  | N | Withdrawn   |
| 681852 | M | South Regi A Level or I  | 0 | 60  | N | Withdrawn   |
| 681861 | M | South Regi A Level or I  | 0 | 60  | N | Withdrawn   |
| 682041 | M | South Wes Lower Tha      | 0 | 120 | N | Withdrawn   |
| 682217 | M | Somalia Re Lower Tha     | 0 | 60  | N | Withdrawn   |
| 682239 | M | Afar Regio HE Qualific   | 0 | 60  | N | Pass        |
| 682259 | M | Tigrai Regi A Level or I | 0 | 60  | N | Pass        |
| 682319 | M | South Regi Lower Tha     | 0 | 120 | N | Withdrawn   |
| 682355 | M | South Regi A Level or I  | 0 | 90  | N | Pass        |
| 682414 | M | Sidamo Re, A Level or I  | 0 | 120 | N | Withdrawn   |
| 682554 | M | Amhara Re Lower Tha      | 0 | 30  | Y | Withdrawn   |
| 682575 | F | Sidamo Re, Lower Tha     | 0 | 90  | N | Withdrawn   |
| 682673 | F | Oromia Re HE Qualific    | 0 | 60  | N | Withdrawn   |
| 682717 | M | Afar Regio HE Qualific   | 0 | 150 | N | Fail        |
| 682758 | F | Afar Regio A Level or I  | 0 | 120 | N | Fail        |
| 683079 | M | Amhara Re Lower Tha      | 0 | 30  | N | Pass        |
| 683170 | M | Afar Regio HE Qualific   | 0 | 60  | N | Fail        |

|        |   |             |              |   |     |   |             |
|--------|---|-------------|--------------|---|-----|---|-------------|
| 683246 | M | Sidamo Re   | A Level or I | 0 | 60  | N | Fail        |
| 683270 | M | Sidamo Re   | A Level or I | 0 | 30  | N | Pass        |
| 683492 | M | Tigrai Regi | Lower Than   | 0 | 60  | N | Fail        |
| 683640 | M | Addis Abak  | Lower Than   | 0 | 60  | N | Withdrawn   |
| 683728 | M | North Regi  | A Level or I | 0 | 60  | N | Pass        |
| 684050 | M | Somalia Re  | HE Qualific  | 0 | 60  | N | Distinction |
| 684064 | M | South Wes   | A Level or I | 0 | 60  | N | Pass        |
| 684225 | M | South Regi  | A Level or I | 0 | 60  | N | Pass        |
| 684357 | M | Sidamo Re   | A Level or I | 0 | 60  | N | Distinction |
| 684473 | F | Sidamo Re   | A Level or I | 0 | 90  | N | Withdrawn   |
| 684498 | M | Amhara Re   | A Level or I | 0 | 90  | N | Withdrawn   |
| 684504 | M | Sidamo Re   | HE Qualific  | 0 | 30  | N | Pass        |
| 684511 | M | South Regi  | Lower Than   | 0 | 90  | N | Pass        |
| 684532 | M | Sidamo Re   | Lower Than   | 0 | 30  | N | Pass        |
| 684567 | M | South Regi  | HE Qualific  | 0 | 60  | N | Pass        |
| 684610 | M | South Regi  | HE Qualific  | 0 | 60  | N | Pass        |
| 684617 | M | North Regi  | A Level or I | 0 | 60  | N | Fail        |
| 684669 | M | North Regi  | HE Qualific  | 0 | 90  | N | Pass        |
| 684825 | M | Afar Regioi | HE Qualific  | 0 | 90  | N | Pass        |
| 684905 | M | Sidamo Re   | A Level or I | 0 | 60  | N | Distinction |
| 684907 | M | Somalia Re  | Lower Than   | 0 | 60  | N | Pass        |
| 684944 | M | South Regi  | Lower Than   | 0 | 90  | N | Fail        |
| 684967 | M | Afar Regioi | A Level or I | 0 | 30  | N | Fail        |
| 685060 | M | South Regi  | Lower Than   | 0 | 60  | N | Pass        |
| 685152 | M | South Regi  | A Level or I | 0 | 90  | N | Pass        |
| 685176 | F | Amhara Re   | Lower Than   | 0 | 60  | N | Fail        |
| 685199 | M | Sidamo Re   | Lower Than   | 0 | 60  | N | Pass        |
| 685236 | M | Tigrai Regi | HE Qualific  | 0 | 60  | N | Withdrawn   |
| 685284 | M | South Wes   | HE Qualific  | 0 | 60  | N | Pass        |
| 685287 | M | South Wes   | HE Qualific  | 0 | 60  | N | Pass        |
| 685292 | M | Sidamo Re   | Lower Than   | 0 | 120 | N | Pass        |
| 685370 | M | Oromia Re   | HE Qualific  | 0 | 60  | N | Pass        |
| 685487 | F | South Wes   | Lower Than   | 0 | 60  | Y | Distinction |
| 685499 | M | Sidamo Re   | A Level or I | 0 | 60  | N | Distinction |
| 685517 | M | Afar Regioi | Lower Than   | 0 | 60  | N | Distinction |
| 685557 | M | Afar Regioi | HE Qualific  | 0 | 60  | N | Fail        |
| 685668 | M | Afar Regioi | A Level or I | 0 | 60  | N | Pass        |
| 685750 | F | Afar Regioi | A Level or I | 0 | 180 | Y | Withdrawn   |
| 685804 | M | Somalia Re  | HE Qualific  | 0 | 60  | N | Fail        |
| 685913 | M | South Regi  | HE Qualific  | 0 | 30  | N | Withdrawn   |
| 685950 | M | Afar Regioi | Lower Than   | 0 | 120 | N | Pass        |
| 685991 | M | Addis Abak  | A Level or I | 0 | 60  | N | Withdrawn   |
| 686051 | M | North Regi  | Lower Than   | 0 | 60  | N | Pass        |
| 686058 | F | North Regi  | Lower Than   | 0 | 120 | N | Distinction |
| 686110 | M | North Regi  | Lower Than   | 0 | 120 | N | Pass        |
| 686287 | M | Sidamo Re   | A Level or I | 0 | 60  | N | Fail        |
| 686339 | F | Tigrai Regi | A Level or I | 0 | 60  | N | Withdrawn   |

|        |   |                          |   |     |   |             |
|--------|---|--------------------------|---|-----|---|-------------|
| 686365 | F | Oromia Re Lower Tha      | 0 | 30  | N | Fail        |
| 686447 | M | Oromia Re Lower Tha      | 0 | 60  | N | Pass        |
| 686462 | M | Tigrai Regi A Level or I | 0 | 60  | N | Withdrawn   |
| 686476 | F | Sidamo Re Lower Tha      | 0 | 60  | N | Pass        |
| 686525 | M | Amhara Re HE Qualific    | 0 | 60  | N | Pass        |
| 686564 | M | Afar Regio A Level or I  | 0 | 60  | N | Distinction |
| 686593 | M | Sidamo Re Lower Tha      | 0 | 60  | N | Distinction |
| 686708 | F | Oromia Re A Level or I   | 0 | 60  | N | Pass        |
| 686753 | M | South Regi A Level or I  | 0 | 60  | N | Pass        |
| 686872 | M | North Regi HE Qualific   | 0 | 60  | N | Distinction |
| 686877 | M | South Regi A Level or I  | 0 | 150 | N | Withdrawn   |
| 686913 | M | Afar Regio Lower Tha     | 0 | 60  | N | Pass        |
| 687023 | F | Sidamo Re A Level or I   | 0 | 120 | N | Pass        |
| 687194 | M | Sidamo Re A Level or I   | 0 | 60  | N | Fail        |
| 687242 | M | North Regi HE Qualific   | 0 | 60  | N | Pass        |
| 687283 | M | Addis Abak A Level or I  | 0 | 60  | N | Withdrawn   |
| 687310 | M | South Regi HE Qualific   | 0 | 60  | N | Fail        |
| 687367 | F | Sidamo Re Lower Tha      | 0 | 120 | N | Withdrawn   |
| 687370 | M | Afar Regio HE Qualific   | 0 | 60  | N | Pass        |
| 687498 | M | Afar Regio Post Gradu    | 0 | 30  | N | Withdrawn   |
| 687563 | M | Afar Regio HE Qualific   | 0 | 60  | N | Pass        |
| 687574 | M | Sidamo Re A Level or I   | 0 | 60  | N | Pass        |
| 687757 | M | Addis Abak HE Qualific   | 0 | 30  | N | Pass        |
| 687766 | M | South Wes Lower Tha      | 0 | 60  | N | Pass        |
| 687772 | M | North Regi A Level or I  | 0 | 60  | N | Distinction |
| 687844 | F | South Wes HE Qualific    | 0 | 90  | N | Pass        |
| 687945 | M | Afar Regio A Level or I  | 0 | 60  | N | Distinction |
| 687953 | M | Addis Abak A Level or I  | 0 | 60  | N | Withdrawn   |
| 688118 | M | Afar Regio A Level or I  | 0 | 60  | N | Pass        |
| 688133 | M | Sidamo Re A Level or I   | 0 | 60  | N | Distinction |
| 688287 | M | Addis Abak A Level or I  | 0 | 60  | N | Pass        |
| 688310 | M | Amhara Re A Level or I   | 0 | 60  | N | Pass        |
| 688404 | M | Addis Abak Lower Tha     | 0 | 30  | N | Withdrawn   |
| 688451 | M | North Regi Post Gradu    | 0 | 60  | N | Distinction |
| 688662 | M | South Regi Lower Tha     | 0 | 60  | N | Distinction |
| 688683 | M | North Regi A Level or I  | 0 | 150 | N | Fail        |
| 688742 | M | South Wes Lower Tha      | 0 | 60  | N | Pass        |
| 688763 | M | North Regi A Level or I  | 0 | 30  | N | Withdrawn   |
| 688870 | M | Afar Regio Lower Tha     | 0 | 30  | N | Fail        |
| 688924 | M | Tigrai Regi A Level or I | 0 | 60  | N | Pass        |
| 688942 | F | Addis Abak A Level or I  | 0 | 60  | N | Withdrawn   |
| 688974 | M | Afar Regio A Level or I  | 0 | 30  | Y | Fail        |
| 689161 | M | Afar Regio HE Qualific   | 0 | 30  | N | Pass        |
| 689217 | M | Afar Regio HE Qualific   | 0 | 60  | N | Pass        |
| 689250 | F | Afar Regio A Level or I  | 0 | 30  | N | Distinction |
| 689288 | M | Somalia Re Lower Tha     | 0 | 60  | N | Pass        |
| 689309 | M | North Regi Lower Tha     | 0 | 90  | N | Fail        |

|        |   |                         |   |     |   |             |
|--------|---|-------------------------|---|-----|---|-------------|
| 689370 | M | Sidamo Re Lower Than    | 0 | 60  | N | Pass        |
| 689389 | M | Amhara Re A Level or    | 0 | 60  | N | Pass        |
| 689618 | M | Afar Region A Level or  | 0 | 30  | N | Withdrawn   |
| 689763 | F | Afar Region A Level or  | 0 | 180 | N | Fail        |
| 689786 | M | Oromia Re Lower Than    | 0 | 60  | N | Withdrawn   |
| 689807 | M | Sidamo Re A Level or    | 0 | 120 | N | Withdrawn   |
| 689840 | M | Afar Region A Level or  | 0 | 60  | N | Pass        |
| 689944 | M | Afar Region A Level or  | 0 | 30  | N | Withdrawn   |
| 689983 | M | South Wes Lower Than    | 0 | 60  | N | Distinction |
| 690016 | M | Sidamo Re HE Qualific   | 0 | 60  | N | Pass        |
| 690095 | M | Addis Abak Lower Than   | 0 | 60  | N | Distinction |
| 690241 | F | Afar Region HE Qualific | 0 | 240 | N | Distinction |
| 690298 | M | Amhara Re A Level or    | 0 | 120 | N | Fail        |
| 690370 | M | Somalia Re Lower Than   | 0 | 60  | N | Pass        |
| 690406 | M | Sidamo Re No Formal     | 0 | 120 | N | Withdrawn   |
| 690439 | M | North Regi Lower Than   | 0 | 90  | N | Fail        |
| 690470 | M | Afar Region Lower Than  | 0 | 60  | N | Withdrawn   |
| 690507 | M | Afar Region A Level or  | 0 | 60  | N | Pass        |
| 690525 | M | North Regi Lower Than   | 0 | 60  | N | Pass        |
| 690553 | M | Tigrai Regi HE Qualific | 0 | 30  | N | Pass        |
| 690586 | M | South Wes A Level or    | 0 | 60  | N | Pass        |
| 690724 | M | South Regi No Formal    | 0 | 90  | N | Pass        |
| 690736 | M | Afar Region Lower Than  | 0 | 60  | N | Fail        |
| 690763 | M | South Regi Lower Than   | 0 | 60  | N | Withdrawn   |
| 690917 | M | Addis Abak HE Qualific  | 0 | 120 | N | Distinction |
| 691078 | M | Tigrai Regi Lower Than  | 0 | 30  | N | Pass        |
| 691189 | M | South Wes Lower Than    | 0 | 30  | N | Pass        |
| 691218 | M | South Wes Lower Than    | 0 | 60  | N | Pass        |
| 691248 | M | Afar Region Lower Than  | 0 | 60  | N | Fail        |
| 691536 | M | South Regi Lower Than   | 0 | 60  | N | Pass        |
| 691701 | M | Amhara Re A Level or    | 0 | 30  | N | Fail        |
| 691790 | F | Oromia Re A Level or    | 0 | 30  | N | Pass        |
| 691875 | M | Tigrai Regi A Level or  | 0 | 60  | N | Pass        |
| 691978 | M | Afar Region A Level or  | 0 | 30  | Y | Withdrawn   |
| 692012 | F | Afar Region A Level or  | 0 | 30  | N | Fail        |
| 692354 | M | South Wes A Level or    | 0 | 60  | N | Pass        |
| 692534 | M | Sidamo Re Lower Than    | 0 | 60  | N | Pass        |
| 692646 | M | Sidamo Re HE Qualific   | 0 | 30  | N | Pass        |
| 692723 | M | South Regi Lower Than   | 0 | 30  | N | Withdrawn   |
| 692924 | M | Afar Region A Level or  | 0 | 60  | N | Distinction |
| 692928 | M | South Wes HE Qualific   | 0 | 60  | N | Pass        |
| 692991 | M | South Regi A Level or   | 0 | 60  | N | Pass        |
| 693069 | M | Sidamo Re HE Qualific   | 0 | 60  | N | Pass        |
| 693111 | M | Afar Region HE Qualific | 0 | 120 | N | Withdrawn   |
| 693147 | M | Somalia Re A Level or   | 0 | 120 | N | Withdrawn   |
| 693221 | M | Oromia Re Lower Than    | 0 | 60  | N | Distinction |
| 693235 | F | South Regi A Level or   | 0 | 60  | N | Pass        |

|        |   |                         |   |     |   |             |
|--------|---|-------------------------|---|-----|---|-------------|
| 693308 | F | Amhara Re Lower Than    | 0 | 60  | N | Pass        |
| 693416 | M | Afar Region A Level or  | 0 | 30  | N | Pass        |
| 693478 | M | Addis Abat A Level or   | 0 | 60  | N | Pass        |
| 693640 | M | Afar Region A Level or  | 0 | 30  | N | Pass        |
| 693910 | M | Sidamo Re A Level or    | 0 | 90  | N | Pass        |
| 693959 | M | South Wes A Level or    | 0 | 60  | N | Pass        |
| 694081 | M | Sidamo Re HE Qualific   | 0 | 60  | N | Withdrawn   |
| 694106 | M | Sidamo Re Lower Than    | 0 | 120 | N | Withdrawn   |
| 694132 | M | Amhara Re HE Qualific   | 0 | 60  | N | Pass        |
| 694152 | M | North Regi HE Qualific  | 0 | 30  | N | Pass        |
| 694218 | M | Somalia Re A Level or   | 0 | 90  | N | Pass        |
| 694246 | M | Somalia Re A Level or   | 0 | 60  | N | Pass        |
| 694304 | M | Somalia Re Lower Than   | 0 | 60  | N | Withdrawn   |
| 694361 | M | Afar Region A Level or  | 0 | 90  | N | Pass        |
| 694457 | F | Afar Region A Level or  | 0 | 30  | N | Fail        |
| 694548 | M | North Regi A Level or   | 0 | 90  | N | Withdrawn   |
| 694571 | M | South Wes A Level or    | 0 | 90  | N | Pass        |
| 694579 | M | South Regi A Level or   | 0 | 120 | N | Pass        |
| 694589 | M | Afar Region HE Qualific | 0 | 30  | N | Pass        |
| 694658 | F | Sidamo Re Lower Than    | 0 | 120 | N | Withdrawn   |
| 694680 | M | South Regi HE Qualific  | 0 | 60  | N | Pass        |
| 694684 | M | North Regi HE Qualific  | 0 | 30  | N | Fail        |
| 694735 | F | Tigrai Regi HE Qualific | 0 | 120 | N | Withdrawn   |
| 694779 | M | South Regi A Level or   | 0 | 60  | N | Pass        |
| 694854 | M | Afar Region A Level or  | 0 | 60  | N | Pass        |
| 695094 | M | South Regi A Level or   | 0 | 60  | N | Withdrawn   |
| 695122 | M | Addis Abat A Level or   | 0 | 90  | N | Distinction |
| 695435 | M | Somalia Re A Level or   | 0 | 30  | N | Pass        |
| 695638 | M | Afar Region A Level or  | 0 | 30  | N | Fail        |
| 695644 | M | South Wes HE Qualific   | 0 | 60  | N | Distinction |
| 695653 | M | Oromia Re A Level or    | 0 | 60  | N | Pass        |
| 695668 | M | Afar Region HE Qualific | 0 | 60  | N | Distinction |
| 695760 | M | Somalia Re A Level or   | 0 | 120 | N | Withdrawn   |
| 695855 | M | Sidamo Re Lower Than    | 0 | 30  | N | Pass        |
| 695919 | M | Afar Region A Level or  | 0 | 30  | N | Pass        |
| 695921 | M | Afar Region Lower Than  | 0 | 30  | N | Fail        |
| 695932 | M | South Wes Lower Than    | 0 | 30  | N | Fail        |
| 695944 | M | Afar Region A Level or  | 0 | 30  | N | Pass        |
| 696044 | M | Oromia Re A Level or    | 0 | 60  | N | Fail        |
| 696128 | F | Somalia Re A Level or   | 0 | 60  | N | Pass        |
| 696192 | M | Somalia Re A Level or   | 0 | 30  | N | Pass        |
| 696325 | M | South Wes A Level or    | 0 | 60  | N | Fail        |
| 696361 | M | Tigrai Regi HE Qualific | 0 | 30  | N | Pass        |
| 696464 | M | Oromia Re Lower Than    | 0 | 30  | N | Withdrawn   |
| 696485 | M | Afar Region Lower Than  | 0 | 60  | N | Pass        |
| 696577 | M | Tigrai Regi HE Qualific | 0 | 60  | N | Pass        |
| 696796 | M | North Regi A Level or   | 0 | 60  | N | Withdrawn   |



|         |   |                            |   |     |   |             |
|---------|---|----------------------------|---|-----|---|-------------|
| 696930  | M | Sidamo Re A Level or I     | 0 | 120 | N | Withdrawn   |
| 697041  | M | Afar Region A Level or I   | 0 | 60  | N | Pass        |
| 697113  | M | South Regi Lower Tha       | 0 | 60  | N | Fail        |
| 697120  | M | South Regi HE Qualific     | 0 | 120 | N | Withdrawn   |
| 697253  | M | Afar Region HE Qualific    | 0 | 60  | N | Pass        |
| 697460  | M | Afar Region HE Qualific    | 0 | 60  | N | Fail        |
| 697461  | M | Amhara Re HE Qualific      | 0 | 30  | N | Distinction |
| 697482  | M | Oromia Re A Level or I     | 0 | 60  | N | Fail        |
| 697658  | M | South Regi A Level or I    | 0 | 90  | N | Distinction |
| 697781  | M | Afar Region HE Qualific    | 0 | 30  | N | Pass        |
| 698011  | F | South Regi HE Qualific     | 0 | 120 | N | Pass        |
| 698024  | M | Afar Region A Level or I   | 0 | 120 | Y | Fail        |
| 698092  | M | Sidamo Re A Level or I     | 0 | 60  | N | Fail        |
| 698300  | M | South Wes A Level or I     | 0 | 60  | N | Pass        |
| 698355  | M | North Regi Lower Tha       | 0 | 120 | N | Distinction |
| 698413  | M | Afar Region HE Qualific    | 0 | 60  | N | Pass        |
| 698417  | M | Afar Region HE Qualific    | 0 | 60  | N | Pass        |
| 698598  | F | Afar Region HE Qualific    | 0 | 120 | N | Withdrawn   |
| 698717  | M | Afar Region A Level or I   | 0 | 30  | Y | Fail        |
| 699038  | M | Afar Region A Level or I   | 0 | 30  | N | Withdrawn   |
| 699049  | M | Afar Region A Level or I   | 0 | 40  | N | Withdrawn   |
| 699050  | M | Afar Region A Level or I   | 0 | 40  | N | Withdrawn   |
| 699134  | M | North Regi HE Qualific     | 0 | 60  | N | Distinction |
| 699135  | M | North Regi HE Qualific     | 0 | 60  | N | Fail        |
| 699136  | M | North Regi HE Qualific     | 0 | 60  | N | Fail        |
| 699138  | M | North Regi HE Qualific     | 0 | 30  | N | Fail        |
| 699140  | M | North Regi HE Qualific     | 0 | 30  | N | Fail        |
| 699141  | M | North Regi HE Qualific     | 0 | 30  | N | Fail        |
| 699142  | M | North Regi HE Qualific     | 0 | 30  | N | Fail        |
| 699170  | M | Afar Region A Level or I   | 0 | 30  | N | Fail        |
| 699440  | M | South Wes A Level or I     | 0 | 60  | N | Distinction |
| 1040037 | M | Tigray Region A Level or I | 0 | 30  | N | Withdrawn   |
| 1334225 | F | South Regi Lower Tha       | 0 | 30  | N | Distinction |
| 1354095 | F | South Regi A Level or I    | 0 | 30  | N | Pass        |
| 1429504 | M | Afar Region A Level or I   | 0 | 60  | N | Pass        |
| 1483814 | F | Addis Abak A Level or I    | 0 | 240 | Y | Distinction |
| 1490624 | M | Addis Abak HE Qualific     | 0 | 60  | N | Distinction |
| 1497822 | M | Amhara Re Lower Tha        | 0 | 60  | N | Pass        |
| 1664171 | M | Amhara Re Lower Tha        | 1 | 45  | Y | Fail        |
| 1674799 | M | South Regi HE Qualific     | 0 | 60  | N | Distinction |
| 1679610 | M | South Regi HE Qualific     | 0 | 60  | N | Distinction |
| 1797068 | M | South Regi Lower Tha       | 0 | 60  | N | Pass        |
| 1841850 | F | Addis Abak Lower Tha       | 0 | 90  | N | Withdrawn   |
| 1878648 | M | Afar Region HE Qualific    | 0 | 150 | N | Pass        |
| 1895288 | M | Afar Region A Level or I   | 0 | 60  | N | Distinction |
| 1895399 | M | South Regi HE Qualific     | 0 | 180 | N | Withdrawn   |
| 1910737 | M | North Regi Lower Tha       | 0 | 30  | N | Pass        |

|         |   |                          |   |     |   |             |
|---------|---|--------------------------|---|-----|---|-------------|
| 1943214 | F | Addis Abat Lower Tha     | 0 | 60  | N | Withdrawn   |
| 1953275 | M | South Regi Lower Tha     | 0 | 60  | N | Withdrawn   |
| 2004220 | M | South Regi A Level or I  | 0 | 30  | N | Pass        |
| 2024200 | M | Afar Regio HE Qualific   | 0 | 30  | N | Fail        |
| 2050998 | M | North Regi A Level or I  | 0 | 60  | N | Withdrawn   |
| 2065756 | M | South Wes Lower Tha      | 0 | 150 | N | Pass        |
| 2067969 | M | Afar Regio HE Qualific   | 0 | 60  | N | Pass        |
| 2072671 | M | South Regi HE Qualific   | 0 | 60  | Y | Fail        |
| 2080916 | M | Afar Regio HE Qualific   | 1 | 30  | N | Withdrawn   |
| 2137785 | M | Amhara Re HE Qualific    | 0 | 30  | N | Pass        |
| 2151019 | M | South Wes Lower Tha      | 0 | 60  | N | Fail        |
| 2173643 | M | Oromia Re Lower Tha      | 0 | 60  | N | Pass        |
| 2192061 | M | Somalia Re HE Qualific   | 0 | 30  | N | Distinction |
| 2204389 | F | South Regi HE Qualific   | 0 | 30  | N | Pass        |
| 2211797 | M | Afar Regio A Level or I  | 0 | 140 | N | Pass        |
| 2221654 | M | Somalia Re A Level or I  | 0 | 60  | N | Pass        |
| 2229389 | M | North Regi Lower Tha     | 0 | 90  | Y | Pass        |
| 2230251 | M | Amhara Re Lower Tha      | 0 | 60  | N | Pass        |
| 2242383 | M | South Regi A Level or I  | 0 | 90  | N | Withdrawn   |
| 2257400 | F | Afar Regio Lower Tha     | 0 | 60  | N | Pass        |
| 2258124 | M | South Regi A Level or I  | 0 | 30  | N | Distinction |
| 2259662 | M | North Regi Lower Tha     | 0 | 60  | N | Pass        |
| 2281441 | M | Afar Regio Post Gradu    | 0 | 115 | N | Pass        |
| 2286544 | M | South Wes A Level or I   | 0 | 30  | N | Pass        |
| 2289071 | M | Afar Regio A Level or I  | 0 | 30  | N | Pass        |
| 2290886 | M | Afar Regio HE Qualific   | 0 | 60  | N | Pass        |
| 2297016 | M | Sidamo Re HE Qualific    | 0 | 120 | N | Pass        |
| 2338535 | M | Afar Regio HE Qualific   | 0 | 60  | N | Fail        |
| 2340230 | F | Afar Regio HE Qualific   | 0 | 120 | N | Withdrawn   |
| 2352407 | F | Tigrai Regi A Level or I | 0 | 90  | N | Pass        |
| 2355274 | M | Sidamo Re A Level or I   | 0 | 30  | N | Pass        |
| 2372573 | M | Addis Abat A Level or I  | 0 | 60  | Y | Withdrawn   |
| 2391303 | M | Amhara Re Lower Tha      | 0 | 120 | N | Fail        |
| 2395505 | M | North Regi A Level or I  | 0 | 60  | N | Withdrawn   |
| 2410632 | M | Sidamo Re No Formal      | 0 | 90  | N | Fail        |
| 2427886 | M | Tigrai Regi Lower Tha    | 0 | 60  | N | Fail        |
| 2436584 | M | Oromia Re A Level or I   | 0 | 30  | N | Fail        |
| 2437591 | M | Addis Abat Lower Tha     | 0 | 90  | N | Distinction |
| 2442423 | M | Somalia Re HE Qualific   | 0 | 90  | N | Pass        |
| 2443165 | F | Addis Abat Lower Tha     | 0 | 120 | N | Withdrawn   |
| 2453691 | M | South Wes Lower Tha      | 0 | 60  | N | Distinction |
| 2464118 | M | Oromia Re Lower Tha      | 0 | 60  | N | Pass        |
| 2484189 | M | Afar Regio Lower Tha     | 0 | 60  | N | Withdrawn   |
| 2498614 | M | Amhara Re HE Qualific    | 0 | 30  | N | Withdrawn   |
| 2501127 | M | South Wes Lower Tha      | 0 | 30  | N | Withdrawn   |
| 2533383 | M | South Regi HE Qualific   | 0 | 30  | N | Pass        |
| 2535666 | M | South Regi Lower Tha     | 0 | 60  | N | Pass        |

|         |   |                        |   |     |   |             |
|---------|---|------------------------|---|-----|---|-------------|
| 2538792 | M | South Regi A Level or  | 0 | 60  | Y | Pass        |
| 2542182 | M | South Wes A Level or   | 0 | 60  | N | Pass        |
| 2550960 | F | Tigrai Regi A Level or | 0 | 30  | N | Pass        |
| 2566474 | M | Afar Regio Lower Tha   | 0 | 60  | N | Withdrawn   |
| 2579558 | M | South Wes A Level or   | 0 | 60  | N | Withdrawn   |
| 2592973 | M | South Wes Lower Tha    | 0 | 30  | N | Pass        |
| 2599179 | M | South Regi A Level or  | 0 | 90  | N | Pass        |
| 2612725 | M | South Regi A Level or  | 1 | 120 | N | Withdrawn   |
| 2622627 | M | Afar Regio HE Qualific | 0 | 180 | Y | Pass        |
| 2626779 | M | Afar Regio Post Gradu  | 0 | 60  | N | Pass        |
| 2627992 | M | South Regi A Level or  | 0 | 60  | N | Pass        |
| 2631935 | M | Amhara Re Lower Tha    | 0 | 60  | N | Withdrawn   |
| 2637000 | M | Tigrai Regi A Level or | 0 | 120 | N | Fail        |
| 2639115 | M | South Regi Lower Tha   | 0 | 60  | N | Pass        |
| 2644404 | M | Afar Regio Post Gradu  | 0 | 30  | N | Pass        |
| 2654928 | M | South Regi Lower Tha   | 0 | 60  | N | Pass        |
| 2663195 | M | Addis Abak Lower Tha   | 0 | 30  | N | Pass        |
| 2681277 | M | Sidamo Re HE Qualific  | 1 | 205 | N | Withdrawn   |
| 2686053 | M | South Wes A Level or   | 0 | 30  | N | Distinction |
| 2686712 | M | South Regi A Level or  | 1 | 60  | N | Fail        |
| 33915   | F | Oromia Re A Level or   | 0 | 60  | N | Distinction |
| 35544   | M | Tigrai Regi A Level or | 0 | 60  | N | Pass        |
| 35860   | M | South Wes A Level or   | 0 | 60  | N | Pass        |
| 36385   | M | South Regi Lower Tha   | 0 | 120 | Y | Withdrawn   |
| 36842   | M | South Regi Lower Tha   | 0 | 90  | N | Withdrawn   |
| 37298   | M | South Wes HE Qualific  | 0 | 120 | N | Pass        |
| 42668   | M | Sidamo Re Lower Tha    | 1 | 120 | N | Pass        |
| 43011   | M | North Regi Lower Tha   | 2 | 60  | N | Withdrawn   |
| 43273   | M | Somalia Re HE Qualific | 0 | 90  | N | Pass        |
| 43430   | M | South Wes A Level or   | 0 | 60  | N | Pass        |
| 49095   | F | South Wes HE Qualific  | 2 | 150 | N | Withdrawn   |
| 50263   | M | South Regi HE Qualific | 0 | 60  | N | Pass        |
| 53197   | F | Amhara Re No Formal    | 0 | 60  | N | Fail        |
| 53709   | M | Tigrai Regi A Level or | 0 | 60  | N | Withdrawn   |
| 55450   | M | Oromia Re A Level or   | 1 | 120 | N | Fail        |
| 58549   | M | North Regi A Level or  | 0 | 120 | N | Distinction |
| 60519   | F | Sidamo Re A Level or   | 0 | 60  | N | Withdrawn   |
| 65656   | M | South Regi A Level or  | 0 | 150 | N | Pass        |
| 68208   | M | Afar Regio HE Qualific | 2 | 270 | N | Fail        |
| 71275   | F | South Wes Lower Tha    | 1 | 150 | N | Fail        |
| 71578   | M | South Regi A Level or  | 0 | 60  | N | Pass        |
| 72693   | F | Sidamo Re Lower Tha    | 0 | 140 | Y | Pass        |
| 74113   | M | Sidamo Re A Level or   | 1 | 60  | N | Fail        |
| 77998   | M | South Wes Lower Tha    | 1 | 180 | N | Withdrawn   |
| 80745   | F | Somalia Re A Level or  | 1 | 60  | Y | Pass        |
| 80886   | M | Amhara Re Lower Tha    | 0 | 60  | N | Withdrawn   |
| 82556   | M | South Wes Lower Tha    | 0 | 60  | N | Fail        |

|        |   |                          |   |     |   |             |
|--------|---|--------------------------|---|-----|---|-------------|
| 82817  | F | Sidamo Re HE Qualific    | 1 | 60  | N | Pass        |
| 84051  | M | Tigray Regi A Level or I | 0 | 120 | N | Fail        |
| 86538  | M | South Regi Lower Thar    | 0 | 60  | Y | Withdrawn   |
| 87152  | M | Addis Abak Lower Thar    | 0 | 60  | Y | Pass        |
| 88957  | M | Oromia Re Lower Thar     | 1 | 120 | N | Withdrawn   |
| 89895  | M | Sidamo Re Lower Thar     | 0 | 60  | N | Pass        |
| 91164  | M | Sidamo Re HE Qualific    | 0 | 60  | Y | Fail        |
| 96729  | M | Sidamo Re A Level or I   | 1 | 120 | N | Pass        |
| 99993  | F | Addis Abak A Level or I  | 0 | 120 | N | Pass        |
| 101306 | M | Sidamo Re A Level or I   | 0 | 120 | N | Fail        |
| 107162 | F | South Regi A Level or I  | 0 | 60  | N | Distinction |
| 107955 | M | Sidamo Re HE Qualific    | 0 | 120 | N | Withdrawn   |
| 108330 | M | South Regi A Level or I  | 1 | 60  | N | Pass        |
| 110085 | M | South Wes Lower Thar     | 1 | 310 | N | Fail        |
| 110116 | M | Somalia Re HE Qualific   | 1 | 150 | N | Pass        |
| 111775 | M | South Wes HE Qualific    | 1 | 60  | N | Pass        |
| 112010 | M | Afar Regio HE Qualific   | 2 | 270 | Y | Withdrawn   |
| 115373 | M | South Regi Lower Thar    | 0 | 60  | N | Pass        |
| 118532 | M | Oromia Re Lower Thar     | 0 | 60  | N | Pass        |
| 118668 | M | Addis Abak HE Qualific   | 0 | 60  | N | Pass        |
| 119353 | M | North Regi A Level or I  | 0 | 60  | N | Pass        |
| 125996 | M | Amhara Re A Level or I   | 0 | 60  | N | Pass        |
| 126088 | M | Sidamo Re HE Qualific    | 1 | 120 | N | Fail        |
| 128142 | M | South Wes A Level or I   | 0 | 60  | N | Fail        |
| 128791 | M | South Regi Lower Thar    | 0 | 60  | N | Withdrawn   |
| 130403 | F | Sidamo Re Lower Thar     | 0 | 60  | N | Pass        |
| 131272 | M | Sidamo Re Lower Thar     | 0 | 120 | N | Pass        |
| 134260 | M | South Regi A Level or I  | 0 | 90  | N | Pass        |
| 134578 | M | North Regi Lower Thar    | 1 | 120 | N | Fail        |
| 135075 | M | Addis Abak A Level or I  | 0 | 60  | N | Pass        |
| 139949 | F | South Wes Lower Thar     | 0 | 60  | N | Pass        |
| 140866 | M | Addis Abak A Level or I  | 0 | 60  | N | Pass        |
| 140907 | M | North Regi No Formal     | 0 | 120 | N | Pass        |
| 142339 | F | Addis Abak Post Gradu    | 0 | 60  | N | Distinction |
| 143350 | F | South Wes A Level or I   | 0 | 90  | N | Pass        |
| 144747 | M | Sidamo Re HE Qualific    | 1 | 150 | N | Distinction |
| 146455 | F | South Wes Lower Thar     | 0 | 60  | N | Withdrawn   |
| 146679 | M | South Regi Lower Thar    | 1 | 210 | N | Withdrawn   |
| 147168 | M | North Regi A Level or I  | 0 | 60  | N | Pass        |
| 149567 | F | South Regi A Level or I  | 0 | 60  | N | Withdrawn   |
| 149680 | M | Addis Abak A Level or I  | 1 | 120 | N | Pass        |
| 149693 | M | Sidamo Re Lower Thar     | 0 | 60  | N | Pass        |
| 150763 | M | North Regi Lower Thar    | 0 | 100 | N | Pass        |
| 151465 | M | Somalia Re A Level or I  | 0 | 60  | N | Pass        |
| 153110 | M | Afar Regio HE Qualific   | 0 | 60  | N | Fail        |
| 153785 | F | Amhara Re Lower Thar     | 0 | 60  | Y | Pass        |
| 155511 | M | Oromia Re A Level or I   | 0 | 60  | N | Distinction |

|        |   |                          |   |     |   |             |
|--------|---|--------------------------|---|-----|---|-------------|
| 157308 | F | South Wes HE Qualific    | 0 | 180 | N | Pass        |
| 160193 | M | Sidamo Re A Level or I   | 2 | 120 | N | Withdrawn   |
| 161658 | F | South Regi Lower Thar    | 1 | 225 | N | Fail        |
| 165617 | M | Sidamo Re HE Qualific    | 1 | 120 | N | Fail        |
| 165806 | F | Sidamo Re A Level or I   | 0 | 60  | N | Fail        |
| 166327 | M | Somalia Re Lower Thar    | 0 | 60  | Y | Pass        |
| 166421 | M | South Regi Lower Thar    | 0 | 60  | N | Pass        |
| 167557 | M | Addis Abak A Level or I  | 0 | 60  | Y | Withdrawn   |
| 167759 | M | Sidamo Re A Level or I   | 1 | 180 | N | Fail        |
| 169490 | M | Sidamo Re Lower Thar     | 0 | 60  | N | Fail        |
| 169555 | M | Afar Regioi A Level or I | 0 | 60  | N | Fail        |
| 169858 | M | Oromia Re A Level or I   | 2 | 90  | N | Pass        |
| 170165 | M | Addis Abak A Level or I  | 0 | 270 | N | Pass        |
| 174436 | F | Tigrai Regi Lower Thar   | 0 | 60  | N | Fail        |
| 174805 | F | Afar Regioi A Level or I | 0 | 135 | N | Withdrawn   |
| 180974 | M | South Wes A Level or I   | 0 | 120 | N | Withdrawn   |
| 181508 | M | South Wes HE Qualific    | 0 | 60  | N | Pass        |
| 181992 | M | Amhara Re Lower Thar     | 0 | 120 | N | Pass        |
| 182468 | M | South Regi A Level or I  | 0 | 90  | N | Fail        |
| 184129 | M | Tigrai Regi A Level or I | 1 | 180 | N | Fail        |
| 185496 | M | Tigrai Regi Lower Thar   | 2 | 120 | N | Fail        |
| 186380 | M | Addis Abak HE Qualific   | 0 | 60  | N | Distinction |
| 189720 | M | South Wes Lower Thar     | 1 | 120 | N | Fail        |
| 190653 | F | Addis Abak Lower Thar    | 0 | 60  | N | Withdrawn   |
| 191998 | M | Sidamo Re A Level or I   | 0 | 60  | N | Withdrawn   |
| 193193 | M | South Regi A Level or I  | 0 | 150 | N | Fail        |
| 193803 | M | South Regi Post Gradu    | 0 | 210 | N | Withdrawn   |
| 193834 | M | North Regi Lower Thar    | 3 | 120 | N | Pass        |
| 198257 | M | Amhara Re Lower Thar     | 1 | 180 | N | Withdrawn   |
| 199244 | F | South Regi A Level or I  | 0 | 60  | N | Pass        |
| 199446 | M | Addis Abak HE Qualific   | 0 | 60  | N | Pass        |
| 200773 | M | North Regi Lower Thar    | 0 | 150 | N | Fail        |
| 202487 | M | Tigrai Regi A Level or I | 0 | 90  | N | Distinction |
| 203050 | F | Oromia Re A Level or I   | 1 | 100 | N | Pass        |
| 203442 | F | Oromia Re A Level or I   | 0 | 120 | N | Withdrawn   |
| 203707 | M | Addis Abak A Level or I  | 0 | 60  | N | Fail        |
| 227401 | M | North Regi Lower Thar    | 0 | 90  | N | Fail        |
| 228635 | M | North Regi A Level or I  | 0 | 90  | N | Withdrawn   |
| 228703 | M | Addis Abak A Level or I  | 0 | 60  | N | Pass        |
| 230279 | M | Sidamo Re Lower Thar     | 0 | 90  | N | Pass        |
| 230684 | M | Amhara Re Lower Thar     | 1 | 60  | Y | Fail        |
| 232675 | M | South Regi HE Qualific   | 1 | 120 | N | Fail        |
| 232764 | F | South Regi A Level or I  | 1 | 150 | N | Withdrawn   |
| 234196 | M | Addis Abak A Level or I  | 0 | 90  | N | Withdrawn   |
| 234609 | F | South Wes Lower Thar     | 1 | 60  | N | Pass        |
| 234661 | M | South Regi Lower Thar    | 0 | 60  | N | Withdrawn   |
| 234727 | F | Addis Abak A Level or I  | 0 | 60  | N | Distinction |

|        |   |                         |   |     |   |             |
|--------|---|-------------------------|---|-----|---|-------------|
| 236844 | M | Amhara Re A Level or I  | 0 | 60  | N | Pass        |
| 237401 | M | Sidamo Re A Level or I  | 0 | 60  | N | Pass        |
| 237953 | M | Somalia Re Lower Than   | 0 | 90  | N | Pass        |
| 238901 | M | Somalia Re Lower Than   | 0 | 60  | Y | Fail        |
| 239540 | M | Addis Abat A Level or I | 0 | 60  | N | Pass        |
| 239748 | M | Oromia Re Lower Than    | 0 | 120 | N | Fail        |
| 240024 | M | South Regi Lower Than   | 0 | 90  | N | Pass        |
| 241166 | M | South Regi A Level or I | 0 | 60  | N | Fail        |
| 241700 | M | Afar Regi A Level or I  | 0 | 60  | N | Fail        |
| 243600 | M | Sidamo Re Lower Than    | 0 | 60  | N | Fail        |
| 243657 | M | Tigrai Regi Lower Than  | 1 | 120 | N | Distinction |
| 244114 | M | South Regi Lower Than   | 0 | 60  | N | Pass        |
| 244816 | M | Amhara Re Lower Than    | 1 | 60  | N | Withdrawn   |
| 244918 | M | Sidamo Re HE Qualific   | 0 | 120 | N | Pass        |
| 246112 | M | North Regi A Level or I | 2 | 120 | N | Fail        |
| 247666 | M | Amhara Re A Level or I  | 1 | 60  | N | Pass        |
| 247856 | M | South Regi Lower Than   | 0 | 60  | N | Pass        |
| 247940 | M | Amhara Re Lower Than    | 3 | 180 | N | Withdrawn   |
| 249362 | M | South Wes HE Qualific   | 0 | 60  | N | Distinction |
| 249570 | F | Somalia Re Lower Than   | 1 | 150 | N | Fail        |
| 252041 | M | South Regi Lower Than   | 0 | 150 | N | Fail        |
| 252095 | F | South Regi Lower Than   | 0 | 90  | N | Pass        |
| 254044 | M | Oromia Re A Level or I  | 1 | 240 | N | Pass        |
| 254162 | M | Addis Abat Lower Than   | 0 | 60  | N | Fail        |
| 254325 | M | Addis Abat HE Qualific  | 0 | 60  | N | Fail        |
| 254463 | F | Amhara Re A Level or I  | 0 | 60  | N | Pass        |
| 255344 | F | Sidamo Re A Level or I  | 0 | 60  | N | Pass        |
| 261335 | M | Addis Abat Lower Than   | 0 | 60  | N | Pass        |
| 263697 | F | South Wes Lower Than    | 0 | 60  | N | Withdrawn   |
| 265112 | M | Sidamo Re HE Qualific   | 0 | 120 | N | Pass        |
| 265855 | F | Afar Regi Lower Than    | 0 | 60  | N | Pass        |
| 266559 | M | Amhara Re A Level or I  | 1 | 240 | N | Fail        |
| 266858 | M | South Regi A Level or I | 1 | 60  | N | Fail        |
| 267602 | M | Somalia Re A Level or I | 0 | 60  | N | Distinction |
| 269243 | F | South Regi A Level or I | 2 | 120 | N | Pass        |
| 269593 | M | South Wes Lower Than    | 0 | 80  | N | Fail        |
| 269677 | M | Amhara Re A Level or I  | 1 | 120 | N | Fail        |
| 271168 | M | North Regi A Level or I | 1 | 210 | N | Fail        |
| 273605 | M | Sidamo Re Lower Than    | 1 | 120 | N | Fail        |
| 274237 | M | Amhara Re Lower Than    | 0 | 120 | N | Withdrawn   |
| 275151 | M | Sidamo Re HE Qualific   | 0 | 60  | N | Distinction |
| 276314 | F | Sidamo Re A Level or I  | 1 | 90  | N | Fail        |
| 276846 | M | South Regi A Level or I | 2 | 60  | N | Withdrawn   |
| 277044 | M | Sidamo Re Lower Than    | 0 | 60  | N | Distinction |
| 277577 | F | Sidamo Re A Level or I  | 1 | 240 | N | Withdrawn   |
| 278282 | M | South Regi A Level or I | 0 | 120 | N | Withdrawn   |
| 281651 | F | South Regi A Level or I | 0 | 180 | N | Pass        |

|        |   |                          |   |     |   |             |
|--------|---|--------------------------|---|-----|---|-------------|
| 281785 | M | Sidamo Re Lower Tha      | 0 | 60  | N | Withdrawn   |
| 282879 | F | Afar Region HE Qualific  | 1 | 150 | N | Pass        |
| 283050 | M | South Regi Lower Tha     | 1 | 180 | N | Fail        |
| 283055 | F | Sidamo Re A Level or I   | 0 | 120 | N | Withdrawn   |
| 283230 | M | North Regi A Level or I  | 1 | 120 | N | Pass        |
| 283348 | M | North Regi HE Qualific   | 0 | 60  | N | Pass        |
| 284395 | M | Sidamo Re A Level or I   | 0 | 120 | N | Withdrawn   |
| 285391 | M | Sidamo Re A Level or I   | 0 | 60  | N | Pass        |
| 285996 | M | South Regi Lower Tha     | 0 | 60  | N | Fail        |
| 286067 | M | South Regi Lower Tha     | 1 | 180 | N | Withdrawn   |
| 286422 | M | Afar Region A Level or I | 0 | 60  | N | Pass        |
| 287099 | F | South Regi A Level or I  | 2 | 120 | N | Pass        |
| 289618 | M | Tigrai Regi A Level or I | 0 | 60  | N | Withdrawn   |
| 290252 | M | Sidamo Re HE Qualific    | 0 | 60  | N | Withdrawn   |
| 291159 | M | Addis Abak Lower Tha     | 1 | 60  | N | Fail        |
| 291960 | M | Addis Abak A Level or I  | 0 | 60  | Y | Pass        |
| 294679 | M | Sidamo Re Lower Tha      | 0 | 60  | N | Withdrawn   |
| 296911 | M | South Regi Lower Tha     | 1 | 70  | Y | Withdrawn   |
| 299237 | F | Sidamo Re A Level or I   | 0 | 60  | N | Pass        |
| 300264 | M | South Regi Lower Tha     | 0 | 60  | N | Fail        |
| 301298 | M | Addis Abak A Level or I  | 0 | 90  | N | Fail        |
| 302924 | F | Sidamo Re HE Qualific    | 0 | 60  | N | Pass        |
| 303288 | M | South Regi Lower Tha     | 0 | 120 | N | Fail        |
| 303595 | M | Tigrai Regi A Level or I | 0 | 60  | N | Pass        |
| 307689 | F | Oromia Re A Level or I   | 0 | 90  | N | Distinction |
| 308363 | F | Amhara Re A Level or I   | 1 | 150 | N | Pass        |
| 309048 | M | Sidamo Re A Level or I   | 2 | 120 | N | Fail        |
| 311401 | M | Sidamo Re Lower Tha      | 0 | 90  | N | Withdrawn   |
| 313975 | F | Afar Region Lower Tha    | 1 | 120 | N | Distinction |
| 314507 | M | South Wes HE Qualific    | 0 | 150 | N | Pass        |
| 314548 | M | North Regi Lower Tha     | 1 | 210 | N | Pass        |
| 315945 | M | Sidamo Re A Level or I   | 0 | 70  | N | Pass        |
| 318241 | M | South Regi A Level or I  | 1 | 120 | N | Fail        |
| 319563 | F | Oromia Re A Level or I   | 0 | 60  | N | Fail        |
| 319884 | F | South Regi A Level or I  | 0 | 60  | N | Pass        |
| 320251 | M | Oromia Re Lower Tha      | 0 | 60  | N | Fail        |
| 320764 | M | Amhara Re Lower Tha      | 3 | 180 | N | Fail        |
| 322106 | M | South Regi Lower Tha     | 2 | 60  | N | Fail        |
| 322985 | F | North Regi Post Gradu    | 1 | 150 | N | Pass        |
| 323809 | M | South Regi A Level or I  | 0 | 60  | Y | Pass        |
| 324305 | F | Somalia Re Lower Tha     | 0 | 60  | N | Withdrawn   |
| 324447 | F | Afar Region HE Qualific  | 0 | 145 | N | Pass        |
| 327650 | F | Afar Region HE Qualific  | 0 | 60  | Y | Pass        |
| 327797 | F | South Wes Lower Tha      | 0 | 60  | N | Withdrawn   |
| 328476 | M | South Regi Lower Tha     | 0 | 120 | N | Pass        |
| 331104 | M | South Regi Lower Tha     | 0 | 60  | N | Withdrawn   |
| 331318 | M | Somalia Re A Level or I  | 0 | 120 | N | Fail        |

|        |   |                           |   |     |   |             |
|--------|---|---------------------------|---|-----|---|-------------|
| 331883 | M | South Wes A Level or I    | 2 | 120 | N | Pass        |
| 332668 | M | Amhara Re Lower Thar      | 0 | 60  | N | Fail        |
| 333346 | M | South Wes HE Qualific     | 0 | 60  | N | Withdrawn   |
| 333832 | M | Amhara Re Lower Thar      | 1 | 150 | N | Fail        |
| 334134 | F | Afar Regio Lower Thar     | 1 | 90  | N | Fail        |
| 334224 | M | Amhara Re Lower Thar      | 0 | 60  | Y | Fail        |
| 335242 | M | Addis Abak A Level or I   | 0 | 60  | N | Distinction |
| 336258 | M | Sidamo Re Lower Thar      | 1 | 60  | N | Pass        |
| 336362 | M | Addis Abak Lower Thar     | 2 | 120 | Y | Fail        |
| 337189 | M | Addis Abak Lower Thar     | 1 | 60  | N | Pass        |
| 338089 | M | Addis Abak Lower Thar     | 0 | 60  | N | Fail        |
| 338373 | M | Amhara Re Lower Thar      | 1 | 150 | N | Fail        |
| 340496 | M | South Regi A Level or I   | 2 | 60  | Y | Pass        |
| 340850 | M | Somalia Re Lower Thar     | 1 | 60  | N | Fail        |
| 342125 | M | Sidamo Re HE Qualific     | 0 | 90  | N | Withdrawn   |
| 342208 | M | South Wes A Level or I    | 0 | 120 | Y | Withdrawn   |
| 342475 | M | Addis Abak A Level or I   | 1 | 180 | Y | Fail        |
| 343053 | M | Sidamo Re A Level or I    | 3 | 180 | N | Fail        |
| 343913 | M | Sidamo Re A Level or I    | 0 | 60  | N | Fail        |
| 345064 | M | South Wes A Level or I    | 0 | 60  | N | Pass        |
| 346207 | M | Sidamo Re Lower Thar      | 0 | 120 | N | Pass        |
| 346853 | M | Amhara Re Lower Thar      | 0 | 60  | N | Fail        |
| 347410 | F | Tigrai Regio Lower Thar   | 0 | 135 | N | Withdrawn   |
| 348159 | F | Sidamo Re HE Qualific     | 0 | 60  | N | Pass        |
| 348986 | M | South Wes A Level or I    | 0 | 60  | N | Pass        |
| 349359 | M | North Regi HE Qualific    | 0 | 180 | N | Withdrawn   |
| 349908 | M | Addis Abak HE Qualific    | 1 | 120 | N | Pass        |
| 350660 | F | Sidamo Re HE Qualific     | 0 | 60  | N | Pass        |
| 351034 | M | Addis Abak A Level or I   | 1 | 60  | N | Pass        |
| 351378 | F | Sidamo Re HE Qualific     | 0 | 60  | N | Fail        |
| 351500 | F | Addis Abak Lower Thar     | 1 | 120 | N | Pass        |
| 352152 | M | North Regi A Level or I   | 0 | 90  | N | Withdrawn   |
| 353018 | M | South Regi HE Qualific    | 0 | 60  | N | Pass        |
| 353221 | M | Amhara Re Lower Thar      | 0 | 60  | N | Pass        |
| 354171 | F | Afar Regio HE Qualific    | 0 | 60  | N | Pass        |
| 354173 | M | South Wes Lower Thar      | 0 | 120 | Y | Withdrawn   |
| 354992 | M | South Regi Lower Thar     | 0 | 270 | N | Fail        |
| 355143 | M | Amhara Re A Level or I    | 1 | 150 | N | Pass        |
| 355149 | M | Oromia Re A Level or I    | 0 | 180 | Y | Withdrawn   |
| 355663 | M | South Regi A Level or I   | 2 | 60  | N | Fail        |
| 355738 | M | Addis Abak A Level or I   | 0 | 60  | N | Pass        |
| 357219 | F | Sidamo Re A Level or I    | 1 | 120 | N | Pass        |
| 357297 | M | Sidamo Re Lower Thar      | 1 | 120 | N | Pass        |
| 358808 | M | Tigrai Regio A Level or I | 0 | 60  | N | Fail        |
| 359156 | M | Addis Abak A Level or I   | 0 | 120 | Y | Distinction |
| 359417 | M | Amhara Re Lower Thar      | 0 | 60  | N | Fail        |
| 359640 | F | South Wes A Level or I    | 0 | 60  | N | Pass        |



|        |   |                         |   |     |   |             |
|--------|---|-------------------------|---|-----|---|-------------|
| 359883 | M | South Regi Lower Tha    | 0 | 120 | N | Pass        |
| 360024 | F | Afar Regio Lower Tha    | 1 | 180 | N | Withdrawn   |
| 360726 | M | Afar Regio A Level or I | 0 | 60  | N | Pass        |
| 361837 | M | Tigrai Regi HE Qualific | 1 | 210 | N | Withdrawn   |
| 362356 | M | Sidamo Re A Level or I  | 2 | 120 | N | Withdrawn   |
| 362668 | F | Sidamo Re A Level or I  | 1 | 60  | N | Pass        |
| 363749 | M | Oromia Re A Level or I  | 0 | 60  | N | Pass        |
| 366492 | M | Sidamo Re A Level or I  | 0 | 90  | N | Pass        |
| 366649 | F | Oromia Re Lower Tha     | 0 | 60  | N | Fail        |
| 366836 | M | Sidamo Re A Level or I  | 1 | 210 | Y | Withdrawn   |
| 367696 | M | Addis Abak A Level or I | 2 | 60  | N | Fail        |
| 368507 | F | Amhara Re A Level or I  | 0 | 60  | N | Fail        |
| 368886 | M | Sidamo Re HE Qualific   | 0 | 180 | N | Fail        |
| 369811 | M | North Regi HE Qualific  | 1 | 150 | N | Pass        |
| 370312 | M | Sidamo Re A Level or I  | 0 | 60  | Y | Pass        |
| 371169 | M | Addis Abak Lower Tha    | 0 | 60  | N | Withdrawn   |
| 371787 | F | South Wes Post Gradu    | 0 | 60  | N | Pass        |
| 371810 | M | Tigrai Regi Lower Tha   | 1 | 120 | N | Withdrawn   |
| 373135 | M | South Wes Lower Tha     | 0 | 120 | N | Pass        |
| 373613 | F | South Regi Lower Tha    | 0 | 60  | Y | Fail        |
| 376109 | F | Amhara Re A Level or I  | 1 | 60  | N | Fail        |
| 377046 | F | Oromia Re Lower Tha     | 0 | 90  | N | Withdrawn   |
| 377244 | M | Amhara Re A Level or I  | 0 | 120 | N | Pass        |
| 377274 | M | Sidamo Re No Formal     | 0 | 60  | N | Pass        |
| 378884 | M | South Wes Lower Tha     | 1 | 210 | N | Pass        |
| 378950 | M | Addis Abak A Level or I | 0 | 120 | N | Distinction |
| 379234 | M | South Regi Lower Tha    | 0 | 60  | N | Fail        |
| 379558 | M | Afar Regio A Level or I | 0 | 60  | N | Pass        |
| 381365 | M | Amhara Re Lower Tha     | 1 | 90  | N | Withdrawn   |
| 382086 | F | Oromia Re Lower Tha     | 0 | 180 | N | Withdrawn   |
| 382160 | M | South Regi A Level or I | 0 | 180 | N | Withdrawn   |
| 383018 | M | South Regi A Level or I | 1 | 135 | N | Fail        |
| 383316 | M | South Wes Lower Tha     | 1 | 120 | N | Pass        |
| 383388 | F | South Wes A Level or I  | 0 | 60  | N | Withdrawn   |
| 383541 | M | Addis Abak Lower Tha    | 0 | 60  | N | Pass        |
| 383558 | M | Addis Abak A Level or I | 0 | 60  | N | Fail        |
| 383748 | M | Sidamo Re HE Qualific   | 0 | 120 | N | Fail        |
| 383907 | F | South Regi A Level or I | 1 | 120 | N | Pass        |
| 383946 | M | Somalia Re Lower Tha    | 1 | 60  | N | Fail        |
| 384866 | F | Sidamo Re Lower Tha     | 0 | 60  | N | Pass        |
| 385578 | M | Amhara Re Lower Tha     | 0 | 60  | N | Fail        |
| 385681 | M | Addis Abak A Level or I | 0 | 120 | Y | Withdrawn   |
| 386985 | M | Addis Abak HE Qualific  | 0 | 60  | N | Withdrawn   |
| 387174 | M | South Wes A Level or I  | 2 | 180 | N | Pass        |
| 387447 | M | North Regi A Level or I | 1 | 150 | N | Pass        |
| 387635 | M | Sidamo Re A Level or I  | 2 | 180 | N | Fail        |
| 388323 | M | South Wes Lower Tha     | 1 | 60  | N | Fail        |

|        |   |                            |   |     |   |             |
|--------|---|----------------------------|---|-----|---|-------------|
| 389759 | M | South Wes HE Qualific      | 0 | 60  | N | Withdrawn   |
| 389773 | F | Somalia Re A Level or I    | 1 | 90  | Y | Withdrawn   |
| 390400 | M | Afar Region Lower Than     | 2 | 120 | N | Fail        |
| 390440 | M | Tigray Region Lower Than   | 1 | 60  | N | Withdrawn   |
| 391343 | M | South Region Lower Than    | 2 | 150 | N | Fail        |
| 391613 | M | South Wes A Level or I     | 1 | 120 | N | Distinction |
| 391630 | M | Oromia Re Lower Than       | 1 | 60  | N | Fail        |
| 391822 | M | South Region Lower Than    | 0 | 60  | N | Pass        |
| 391891 | M | Afar Region HE Qualific    | 0 | 60  | N | Pass        |
| 392217 | M | Sidamo Re Lower Than       | 1 | 105 | N | Withdrawn   |
| 392691 | M | South Wes Lower Than       | 0 | 210 | N | Withdrawn   |
| 393918 | M | Somalia Re Lower Than      | 1 | 120 | N | Fail        |
| 393934 | M | Addis Abak A Level or I    | 0 | 120 | N | Fail        |
| 394347 | M | Tigray Region A Level or I | 1 | 60  | N | Fail        |
| 394937 | M | South Wes Lower Than       | 1 | 120 | N | Pass        |
| 395010 | M | Addis Abak Lower Than      | 2 | 150 | N | Withdrawn   |
| 395367 | F | Amhara Re Lower Than       | 0 | 90  | Y | Withdrawn   |
| 395463 | M | South Region HE Qualific   | 2 | 180 | N | Fail        |
| 395588 | M | Sidamo Re A Level or I     | 1 | 150 | N | Pass        |
| 396679 | F | South Region HE Qualific   | 0 | 180 | N | Fail        |
| 396739 | M | Oromia Re HE Qualific      | 0 | 60  | N | Pass        |
| 397297 | M | Sidamo Re HE Qualific      | 0 | 60  | N | Withdrawn   |
| 397310 | M | Addis Abak Lower Than      | 1 | 90  | N | Fail        |
| 398040 | M | South Region Lower Than    | 0 | 60  | N | Distinction |
| 398118 | F | South Wes Lower Than       | 0 | 60  | N | Fail        |
| 398656 | M | South Region A Level or I  | 0 | 120 | N | Fail        |
| 398862 | M | Tigray Region A Level or I | 0 | 90  | N | Pass        |
| 399895 | M | Sidamo Re A Level or I     | 0 | 60  | N | Fail        |
| 400004 | M | South Wes A Level or I     | 1 | 60  | N | Withdrawn   |
| 400010 | M | South Region Lower Than    | 1 | 360 | N | Fail        |
| 400087 | F | North Region A Level or I  | 1 | 60  | N | Pass        |
| 400632 | M | South Region Lower Than    | 0 | 60  | N | Pass        |
| 401812 | M | Amhara Re Lower Than       | 0 | 60  | N | Fail        |
| 402531 | M | South Wes Lower Than       | 1 | 120 | N | Fail        |
| 403158 | F | Sidamo Re A Level or I     | 0 | 60  | N | Withdrawn   |
| 404135 | F | South Wes A Level or I     | 0 | 60  | N | Pass        |
| 404147 | M | Tigray Region Lower Than   | 2 | 120 | N | Fail        |
| 404170 | F | Sidamo Re A Level or I     | 0 | 90  | N | Withdrawn   |
| 404559 | M | Afar Region A Level or I   | 0 | 60  | N | Fail        |
| 405219 | F | Oromia Re A Level or I     | 0 | 60  | N | Distinction |
| 405314 | M | Amhara Re A Level or I     | 0 | 60  | N | Withdrawn   |
| 405889 | M | South Region Lower Than    | 0 | 60  | N | Pass        |
| 407371 | F | South Region A Level or I  | 0 | 60  | N | Distinction |
| 407670 | M | Addis Abak Lower Than      | 2 | 120 | N | Distinction |
| 407681 | M | South Region A Level or I  | 0 | 60  | N | Pass        |
| 407818 | M | South Region HE Qualific   | 0 | 60  | N | Pass        |
| 407968 | M | Addis Abak A Level or I    | 0 | 90  | N | Pass        |

|        |   |                          |   |     |   |             |
|--------|---|--------------------------|---|-----|---|-------------|
| 408372 | M | Addis Abat Lower Tha     | 2 | 60  | N | Pass        |
| 408651 | M | Addis Abat A Level or I  | 0 | 60  | N | Fail        |
| 408753 | F | South Regi Lower Tha     | 0 | 90  | N | Pass        |
| 408762 | M | South Regi Lower Tha     | 0 | 60  | N | Withdrawn   |
| 409663 | M | Amhara Re Lower Tha      | 2 | 120 | N | Withdrawn   |
| 410874 | M | Sidamo Re, A Level or I  | 2 | 120 | N | Fail        |
| 411013 | M | North Regi Lower Tha     | 1 | 180 | N | Distinction |
| 411553 | F | Sidamo Re, Post Gradu    | 2 | 180 | N | Fail        |
| 412025 | M | Afar Regioi A Level or I | 2 | 60  | N | Pass        |
| 412102 | M | Afar Regioi HE Qualific  | 0 | 60  | N | Pass        |
| 412263 | M | South Wes HE Qualific    | 0 | 60  | N | Pass        |
| 412307 | F | Sidamo Re, A Level or I  | 0 | 60  | N | Pass        |
| 413705 | F | Oromia Re Lower Tha      | 2 | 150 | N | Fail        |
| 414258 | F | Afar Regioi A Level or I | 0 | 60  | N | Fail        |
| 415952 | M | Sidamo Re, Lower Tha     | 0 | 120 | N | Pass        |
| 415988 | M | Sidamo Re, No Formal     | 1 | 120 | N | Fail        |
| 416229 | M | North Regi A Level or I  | 0 | 90  | N | Pass        |
| 416696 | F | Afar Regioi HE Qualific  | 0 | 60  | N | Withdrawn   |
| 416725 | M | South Regi A Level or I  | 1 | 60  | N | Distinction |
| 417863 | F | Somalia Re HE Qualific   | 0 | 90  | N | Withdrawn   |
| 418634 | F | Sidamo Re, Lower Tha     | 1 | 120 | N | Pass        |
| 418998 | M | North Regi A Level or I  | 0 | 120 | N | Pass        |
| 419228 | M | Addis Abat Lower Tha     | 1 | 300 | N | Withdrawn   |
| 419565 | M | Addis Abat Lower Tha     | 0 | 120 | N | Withdrawn   |
| 419791 | F | North Regi A Level or I  | 0 | 60  | N | Pass        |
| 419946 | M | Sidamo Re, HE Qualific   | 0 | 210 | N | Pass        |
| 420096 | M | Addis Abat Lower Tha     | 0 | 60  | N | Withdrawn   |
| 420673 | M | South Wes HE Qualific    | 1 | 150 | N | Withdrawn   |
| 420699 | M | South Wes A Level or I   | 0 | 60  | N | Pass        |
| 420720 | M | Addis Abat HE Qualific   | 0 | 90  | N | Pass        |
| 420894 | M | Oromia Re A Level or I   | 2 | 120 | N | Pass        |
| 422061 | M | South Regi HE Qualific   | 0 | 90  | N | Pass        |
| 422087 | M | Afar Regioi Lower Tha    | 0 | 60  | N | Distinction |
| 422280 | F | South Regi A Level or I  | 0 | 120 | N | Withdrawn   |
| 422340 | F | Sidamo Re, HE Qualific   | 1 | 60  | N | Pass        |
| 423601 | M | Amhara Re A Level or I   | 1 | 120 | N | Fail        |
| 423985 | M | Sidamo Re, A Level or I  | 1 | 210 | N | Fail        |
| 424544 | M | Sidamo Re, A Level or I  | 0 | 210 | N | Fail        |
| 425748 | M | Addis Abat A Level or I  | 0 | 60  | N | Fail        |
| 425755 | M | North Regi Lower Tha     | 0 | 60  | N | Withdrawn   |
| 425997 | M | South Regi Lower Tha     | 0 | 120 | N | Fail        |
| 426074 | M | Sidamo Re, A Level or I  | 1 | 120 | N | Pass        |
| 426465 | F | Sidamo Re, Lower Tha     | 0 | 60  | N | Pass        |
| 427228 | M | Addis Abat Lower Tha     | 1 | 180 | N | Withdrawn   |
| 427348 | M | Afar Regioi HE Qualific  | 0 | 60  | N | Pass        |
| 428142 | F | Afar Regioi Lower Tha    | 0 | 90  | N | Pass        |
| 428641 | M | Afar Regioi A Level or I | 0 | 60  | N | Pass        |

|        |   |                         |   |     |   |             |
|--------|---|-------------------------|---|-----|---|-------------|
| 428932 | F | South Wes A Level or I  | 0 | 120 | Y | Distinction |
| 428979 | M | Addis Abak HE Qualific  | 1 | 150 | N | Pass        |
| 429162 | M | South Wes A Level or I  | 1 | 120 | N | Fail        |
| 430554 | M | South Regi A Level or I | 0 | 90  | N | Withdrawn   |
| 430870 | M | Amhara Re Lower Than    | 1 | 120 | N | Fail        |
| 431251 | M | Sidamo Re A Level or I  | 1 | 60  | N | Pass        |
| 431268 | M | Addis Abak HE Qualific  | 0 | 60  | N | Withdrawn   |
| 432222 | M | Oromia Re A Level or I  | 1 | 60  | N | Pass        |
| 432532 | M | North Regi A Level or I | 1 | 60  | N | Distinction |
| 434298 | M | South Regi Lower Than   | 0 | 90  | Y | Fail        |
| 434476 | M | Sidamo Re A Level or I  | 1 | 180 | Y | Withdrawn   |
| 435043 | M | Afar Regio A Level or I | 1 | 120 | N | Pass        |
| 435258 | M | South Wes Lower Than    | 0 | 60  | N | Fail        |
| 437246 | M | Somalia Re Lower Than   | 1 | 60  | N | Fail        |
| 437432 | F | Sidamo Re Lower Than    | 0 | 90  | N | Withdrawn   |
| 437752 | M | Amhara Re No Formal     | 0 | 90  | N | Withdrawn   |
| 437872 | M | South Regi Lower Than   | 0 | 120 | N | Pass        |
| 438323 | M | Oromia Re HE Qualific   | 0 | 120 | N | Pass        |
| 438452 | M | Amhara Re A Level or I  | 0 | 60  | N | Distinction |
| 439002 | F | Tigrai Regi Lower Than  | 1 | 150 | N | Withdrawn   |
| 440288 | M | South Wes A Level or I  | 0 | 60  | N | Withdrawn   |
| 440632 | M | South Wes Lower Than    | 2 | 180 | N | Fail        |
| 440825 | M | Sidamo Re Lower Than    | 1 | 150 | N | Fail        |
| 440851 | M | Afar Regio Lower Than   | 2 | 120 | N | Withdrawn   |
| 440911 | M | Somalia Re Lower Than   | 1 | 60  | N | Fail        |
| 441421 | M | South Wes Lower Than    | 0 | 60  | N | Withdrawn   |
| 441954 | M | Sidamo Re Lower Than    | 0 | 90  | N | Pass        |
| 442436 | M | South Regi HE Qualific  | 0 | 60  | N | Withdrawn   |
| 443563 | M | South Regi A Level or I | 1 | 120 | N | Pass        |
| 443696 | F | Sidamo Re A Level or I  | 1 | 360 | N | Fail        |
| 443950 | M | South Wes Lower Than    | 0 | 60  | N | Pass        |
| 443989 | M | Addis Abak A Level or I | 0 | 60  | N | Distinction |
| 446440 | F | South Wes A Level or I  | 1 | 160 | N | Pass        |
| 446825 | M | South Wes HE Qualific   | 2 | 270 | N | Withdrawn   |
| 447036 | M | Addis Abak Lower Than   | 2 | 150 | N | Withdrawn   |
| 447127 | M | Sidamo Re Lower Than    | 1 | 180 | N | Fail        |
| 464616 | M | Sidamo Re A Level or I  | 0 | 120 | N | Withdrawn   |
| 464755 | M | Sidamo Re A Level or I  | 0 | 120 | N | Withdrawn   |
| 464785 | M | North Regi A Level or I | 0 | 60  | N | Pass        |
| 465175 | M | Afar Regio Lower Than   | 1 | 90  | N | Fail        |
| 465312 | F | North Regi A Level or I | 1 | 120 | N | Pass        |
| 465430 | M | South Wes A Level or I  | 0 | 60  | N | Pass        |
| 465719 | M | Afar Regio Lower Than   | 0 | 75  | N | Fail        |
| 466203 | M | Sidamo Re Lower Than    | 0 | 120 | N | Pass        |
| 466329 | F | Oromia Re Lower Than    | 0 | 120 | N | Fail        |
| 466582 | F | Amhara Re Lower Than    | 0 | 60  | N | Withdrawn   |
| 466599 | M | South Regi A Level or I | 0 | 120 | N | Fail        |

|        |   |                          |   |     |   |             |
|--------|---|--------------------------|---|-----|---|-------------|
| 466828 | M | South Wes A Level or I   | 1 | 60  | N | Distinction |
| 467416 | M | Addis Abak Lower Tha     | 1 | 180 | N | Pass        |
| 467506 | M | South Wes A Level or I   | 0 | 180 | N | Pass        |
| 467700 | M | South Regi A Level or I  | 1 | 60  | N | Pass        |
| 467725 | M | Afar Regio Lower Tha     | 1 | 60  | N | Pass        |
| 467854 | F | North Regi Lower Tha     | 0 | 120 | N | Pass        |
| 468497 | M | South Regi Lower Tha     | 0 | 60  | N | Fail        |
| 468908 | M | South Wes A Level or I   | 0 | 120 | N | Fail        |
| 469154 | M | South Regi A Level or I  | 0 | 120 | N | Pass        |
| 469743 | M | South Wes No Formal      | 1 | 120 | N | Distinction |
| 470786 | M | South Wes A Level or I   | 0 | 60  | N | Pass        |
| 471977 | M | South Wes Lower Tha      | 0 | 60  | N | Pass        |
| 472602 | M | Afar Regio HE Qualific   | 0 | 60  | N | Fail        |
| 472810 | M | Addis Abak Lower Tha     | 0 | 60  | N | Withdrawn   |
| 472981 | M | Sidamo Re Lower Tha      | 0 | 120 | N | Withdrawn   |
| 473081 | F | Afar Regio Lower Tha     | 0 | 120 | N | Withdrawn   |
| 473102 | F | Oromia Re Lower Tha      | 1 | 120 | N | Withdrawn   |
| 473162 | F | Oromia Re Lower Tha      | 0 | 60  | N | Pass        |
| 473789 | M | South Regi Lower Tha     | 0 | 90  | N | Pass        |
| 474256 | M | Sidamo Re Lower Tha      | 1 | 120 | N | Withdrawn   |
| 474677 | M | Sidamo Re Lower Tha      | 0 | 60  | N | Fail        |
| 475681 | M | Amhara Re A Level or I   | 0 | 60  | N | Fail        |
| 476194 | M | Afar Regio Lower Tha     | 0 | 60  | N | Pass        |
| 476845 | M | Sidamo Re HE Qualific    | 0 | 60  | N | Pass        |
| 476946 | F | Somalia Re Lower Tha     | 1 | 150 | N | Fail        |
| 477185 | M | Oromia Re A Level or I   | 0 | 120 | N | Pass        |
| 477812 | M | Afar Regio Lower Tha     | 1 | 120 | Y | Withdrawn   |
| 478279 | M | North Regi A Level or I  | 0 | 60  | N | Pass        |
| 478337 | F | Sidamo Re Lower Tha      | 0 | 90  | N | Pass        |
| 478432 | M | Sidamo Re A Level or I   | 0 | 60  | N | Pass        |
| 478660 | M | Somalia Re A Level or I  | 0 | 60  | N | Pass        |
| 478685 | F | Afar Regio A Level or I  | 0 | 60  | N | Fail        |
| 479057 | M | North Regi Lower Tha     | 0 | 90  | N | Pass        |
| 479356 | M | Addis Abak HE Qualific   | 0 | 150 | N | Pass        |
| 479764 | M | Sidamo Re Lower Tha      | 0 | 60  | N | Pass        |
| 479828 | M | Somalia Re A Level or I  | 1 | 180 | N | Withdrawn   |
| 479860 | M | South Wes Lower Tha      | 0 | 60  | N | Pass        |
| 479892 | M | South Wes A Level or I   | 0 | 120 | N | Withdrawn   |
| 479922 | M | Sidamo Re A Level or I   | 1 | 180 | N | Pass        |
| 480014 | M | Sidamo Re A Level or I   | 0 | 60  | N | Distinction |
| 480181 | M | North Regi A Level or I  | 0 | 60  | N | Withdrawn   |
| 480199 | F | Sidamo Re Lower Tha      | 1 | 150 | N | Pass        |
| 480937 | M | Sidamo Re Lower Tha      | 1 | 150 | N | Pass        |
| 480960 | F | Sidamo Re A Level or I   | 1 | 150 | N | Distinction |
| 480981 | M | Sidamo Re Lower Tha      | 1 | 120 | Y | Fail        |
| 480984 | M | North Regi A Level or I  | 0 | 70  | N | Pass        |
| 481227 | M | Tigrai Regi A Level or I | 0 | 60  | N | Withdrawn   |

|        |   |                          |   |     |   |             |
|--------|---|--------------------------|---|-----|---|-------------|
| 481367 | M | Amhara Re A Level or I   | 1 | 120 | N | Withdrawn   |
| 481453 | M | Sidamo Re A Level or I   | 0 | 60  | N | Pass        |
| 482071 | M | South Regi Lower Tha     | 0 | 90  | N | Pass        |
| 482187 | F | North Regi A Level or I  | 0 | 60  | N | Distinction |
| 482264 | F | South Regi A Level or I  | 0 | 60  | N | Withdrawn   |
| 482268 | M | Addis Abak No Formal     | 1 | 180 | N | Fail        |
| 482275 | M | Amhara Re Lower Tha      | 1 | 210 | N | Fail        |
| 482513 | F | Amhara Re Lower Tha      | 0 | 60  | N | Pass        |
| 483117 | F | Addis Abak Lower Tha     | 0 | 120 | N | Withdrawn   |
| 483179 | M | Sidamo Re A Level or I   | 1 | 120 | N | Withdrawn   |
| 483620 | M | South Regi Lower Tha     | 1 | 180 | N | Pass        |
| 483743 | M | South Wes Lower Tha      | 1 | 150 | N | Fail        |
| 483872 | M | Sidamo Re A Level or I   | 0 | 120 | N | Pass        |
| 483997 | F | North Regi A Level or I  | 0 | 60  | N | Pass        |
| 484165 | M | Amhara Re A Level or I   | 1 | 150 | N | Fail        |
| 484242 | M | Tigrai Regi A Level or I | 0 | 120 | N | Withdrawn   |
| 484458 | F | Sidamo Re A Level or I   | 0 | 90  | N | Distinction |
| 484556 | M | Oromia Re Lower Tha      | 0 | 60  | Y | Fail        |
| 484780 | F | Oromia Re Lower Tha      | 0 | 90  | N | Pass        |
| 484790 | M | Addis Abak A Level or I  | 1 | 180 | N | Pass        |
| 484947 | M | South Wes A Level or I   | 0 | 90  | N | Pass        |
| 485412 | F | South Regi A Level or I  | 1 | 210 | N | Withdrawn   |
| 485528 | M | Sidamo Re A Level or I   | 0 | 60  | N | Pass        |
| 485544 | M | South Regi HE Qualific   | 0 | 150 | N | Fail        |
| 485768 | M | Addis Abak Lower Tha     | 0 | 60  | N | Pass        |
| 486007 | F | Oromia Re A Level or I   | 0 | 60  | N | Pass        |
| 486145 | M | South Regi HE Qualific   | 1 | 120 | N | Fail        |
| 487168 | F | Somalia Re A Level or I  | 0 | 120 | N | Fail        |
| 487271 | M | Somalia Re Lower Tha     | 1 | 120 | N | Withdrawn   |
| 487636 | M | Amhara Re A Level or I   | 0 | 90  | N | Pass        |
| 488386 | F | Sidamo Re HE Qualific    | 0 | 60  | Y | Withdrawn   |
| 488675 | M | North Regi Post Gradu    | 0 | 120 | N | Pass        |
| 488968 | F | South Wes HE Qualific    | 1 | 180 | N | Distinction |
| 489443 | M | South Regi A Level or I  | 0 | 60  | N | Pass        |
| 490082 | F | Addis Abak HE Qualific   | 0 | 60  | N | Distinction |
| 490156 | M | North Regi HE Qualific   | 1 | 180 | N | Fail        |
| 490195 | M | Sidamo Re A Level or I   | 0 | 60  | N | Pass        |
| 490284 | M | Addis Abak A Level or I  | 0 | 60  | N | Fail        |
| 490542 | F | Addis Abak Lower Tha     | 1 | 180 | N | Withdrawn   |
| 491004 | M | Tigrai Regi A Level or I | 0 | 60  | N | Pass        |
| 491011 | M | Oromia Re A Level or I   | 0 | 120 | Y | Withdrawn   |
| 491503 | F | Tigrai Regi A Level or I | 0 | 120 | N | Fail        |
| 491636 | M | Addis Abak Lower Tha     | 0 | 90  | N | Pass        |
| 492111 | M | North Regi A Level or I  | 0 | 90  | N | Withdrawn   |
| 494164 | M | South Wes Lower Tha      | 1 | 150 | N | Fail        |
| 494165 | M | South Wes Lower Tha      | 1 | 120 | N | Pass        |
| 494340 | M | Sidamo Re A Level or I   | 0 | 90  | N | Pass        |

|        |   |                          |   |     |   |             |
|--------|---|--------------------------|---|-----|---|-------------|
| 494443 | F | Sidamo Re Lower Tha      | 0 | 60  | N | Pass        |
| 494622 | M | Sidamo Re Lower Tha      | 0 | 120 | N | Pass        |
| 494866 | M | Amhara Re Lower Tha      | 0 | 90  | N | Withdrawn   |
| 494903 | M | South Regi Lower Tha     | 0 | 120 | N | Fail        |
| 495318 | M | Amhara Re Lower Tha      | 0 | 60  | N | Withdrawn   |
| 495621 | M | South Regi A Level or I  | 1 | 120 | Y | Fail        |
| 495776 | M | South Wes Lower Tha      | 1 | 180 | N | Fail        |
| 496470 | M | North Regi A Level or I  | 0 | 60  | N | Pass        |
| 496491 | F | Sidamo Re Lower Tha      | 0 | 60  | N | Distinction |
| 496561 | M | Addis Abak A Level or I  | 0 | 150 | N | Fail        |
| 496657 | M | Sidamo Re Lower Tha      | 0 | 60  | N | Withdrawn   |
| 496671 | F | South Wes A Level or I   | 0 | 60  | N | Fail        |
| 497102 | M | Afar Regio HE Qualific   | 1 | 270 | N | Pass        |
| 497139 | M | South Regi Lower Tha     | 1 | 210 | N | Withdrawn   |
| 497180 | M | Addis Abak Lower Tha     | 0 | 120 | N | Pass        |
| 497211 | M | Addis Abak A Level or I  | 0 | 60  | N | Pass        |
| 497226 | M | South Wes Lower Tha      | 0 | 60  | N | Fail        |
| 497410 | M | South Regi A Level or I  | 0 | 60  | N | Pass        |
| 497855 | M | North Regi A Level or I  | 0 | 60  | N | Fail        |
| 497891 | M | Sidamo Re Lower Tha      | 0 | 180 | N | Withdrawn   |
| 497897 | F | South Regi No Formal     | 1 | 120 | N | Fail        |
| 498269 | F | Addis Abak Lower Tha     | 0 | 60  | Y | Pass        |
| 498554 | M | South Wes Lower Tha      | 0 | 60  | N | Pass        |
| 498578 | F | South Wes A Level or I   | 0 | 150 | N | Fail        |
| 498636 | M | South Regi Lower Tha     | 0 | 60  | Y | Withdrawn   |
| 499244 | M | South Regi Lower Tha     | 1 | 180 | N | Withdrawn   |
| 499354 | M | Tigrai Regi A Level or I | 1 | 120 | N | Pass        |
| 499372 | M | Sidamo Re A Level or I   | 1 | 120 | Y | Fail        |
| 499419 | M | South Wes A Level or I   | 1 | 180 | N | Withdrawn   |
| 499993 | M | Addis Abak Lower Tha     | 0 | 60  | N | Pass        |
| 500230 | M | South Regi Lower Tha     | 0 | 60  | N | Distinction |
| 500652 | M | Addis Abak Lower Tha     | 0 | 60  | N | Pass        |
| 501302 | F | Afar Regio HE Qualific   | 0 | 90  | N | Withdrawn   |
| 501411 | M | Sidamo Re A Level or I   | 0 | 60  | N | Withdrawn   |
| 501493 | M | Amhara Re Lower Tha      | 1 | 270 | Y | Fail        |
| 501755 | M | South Regi Lower Tha     | 0 | 60  | N | Withdrawn   |
| 501869 | M | Amhara Re A Level or I   | 0 | 120 | N | Fail        |
| 502361 | M | South Regi Lower Tha     | 0 | 120 | N | Withdrawn   |
| 502512 | M | Somalia Re HE Qualific   | 1 | 180 | N | Pass        |
| 502517 | M | South Regi A Level or I  | 1 | 120 | N | Withdrawn   |
| 502531 | M | South Regi Lower Tha     | 1 | 300 | N | Withdrawn   |
| 502900 | M | Addis Abak A Level or I  | 0 | 120 | N | Fail        |
| 502973 | M | Oromia Re Lower Tha      | 0 | 120 | N | Fail        |
| 503134 | F | Sidamo Re A Level or I   | 1 | 240 | N | Withdrawn   |
| 503544 | M | Amhara Re HE Qualific    | 0 | 90  | N | Fail        |
| 503668 | F | Sidamo Re Lower Tha      | 1 | 180 | N | Pass        |
| 504157 | F | Oromia Re Lower Tha      | 0 | 60  | N | Pass        |

|        |   |                            |   |     |   |             |
|--------|---|----------------------------|---|-----|---|-------------|
| 504162 | M | Sidamo Re Lower Tha        | 0 | 60  | Y | Pass        |
| 504190 | M | Sidamo Re HE Qualific      | 1 | 120 | N | Fail        |
| 504200 | M | Afar Region Lower Tha      | 0 | 60  | Y | Fail        |
| 504231 | M | South Regi A Level or I    | 0 | 60  | Y | Fail        |
| 504243 | F | North Regi A Level or I    | 1 | 150 | N | Pass        |
| 504533 | M | Somalia Re A Level or I    | 1 | 120 | N | Pass        |
| 504737 | F | South Regi A Level or I    | 0 | 120 | N | Pass        |
| 504741 | M | Afar Region HE Qualific    | 0 | 75  | Y | Withdrawn   |
| 504824 | M | Sidamo Re Lower Tha        | 1 | 120 | N | Fail        |
| 504956 | M | Afar Region HE Qualific    | 0 | 60  | Y | Withdrawn   |
| 505002 | M | Sidamo Re A Level or I     | 0 | 60  | N | Fail        |
| 505199 | M | Sidamo Re Lower Tha        | 1 | 120 | N | Pass        |
| 505244 | M | Amhara Re A Level or I     | 1 | 120 | N | Withdrawn   |
| 505315 | F | South Wes No Formal        | 1 | 180 | N | Pass        |
| 505333 | M | Tigrai Region Lower Tha    | 1 | 120 | N | Fail        |
| 505488 | M | Sidamo Re A Level or I     | 1 | 180 | N | Pass        |
| 505501 | F | Sidamo Re Lower Tha        | 0 | 120 | N | Withdrawn   |
| 505508 | M | Sidamo Re A Level or I     | 0 | 60  | N | Distinction |
| 506092 | F | Somalia Re Lower Tha       | 0 | 120 | N | Withdrawn   |
| 506321 | M | Oromia Re A Level or I     | 0 | 120 | N | Pass        |
| 506412 | M | Addis Abak A Level or I    | 1 | 120 | N | Fail        |
| 506930 | M | Somalia Re Lower Tha       | 0 | 120 | N | Fail        |
| 507034 | M | South Regi Post Gradu      | 0 | 60  | N | Pass        |
| 508068 | M | Tigrai Region HE Qualific  | 1 | 210 | N | Pass        |
| 508288 | M | Addis Abak Lower Tha       | 1 | 120 | Y | Fail        |
| 508572 | M | South Wes A Level or I     | 0 | 60  | N | Fail        |
| 508749 | M | South Wes Lower Tha        | 1 | 120 | N | Withdrawn   |
| 508830 | M | South Wes A Level or I     | 0 | 120 | N | Pass        |
| 508927 | M | Addis Abak Lower Tha       | 0 | 60  | N | Fail        |
| 509177 | M | Sidamo Re Lower Tha        | 1 | 180 | N | Withdrawn   |
| 509535 | M | North Regi A Level or I    | 0 | 120 | N | Withdrawn   |
| 510027 | M | South Wes Lower Tha        | 1 | 150 | N | Fail        |
| 510186 | M | North Regi HE Qualific     | 1 | 180 | N | Pass        |
| 510335 | M | Afar Region A Level or I   | 0 | 120 | N | Pass        |
| 510693 | M | Sidamo Re A Level or I     | 0 | 60  | N | Fail        |
| 510759 | M | Somalia Re Lower Tha       | 0 | 120 | N | Pass        |
| 510883 | M | Addis Abak Lower Tha       | 0 | 60  | Y | Pass        |
| 511005 | F | Sidamo Re Lower Tha        | 0 | 60  | N | Withdrawn   |
| 511340 | M | South Wes Lower Tha        | 0 | 120 | N | Fail        |
| 511762 | M | North Regi Lower Tha       | 1 | 270 | Y | Distinction |
| 511990 | F | South Regi A Level or I    | 1 | 120 | N | Fail        |
| 512305 | M | Sidamo Re Lower Tha        | 1 | 150 | N | Withdrawn   |
| 512961 | M | Sidamo Re A Level or I     | 0 | 60  | N | Fail        |
| 513172 | M | South Wes Lower Tha        | 0 | 120 | N | Fail        |
| 513266 | M | North Regi Lower Tha       | 1 | 120 | N | Pass        |
| 513268 | M | South Wes Lower Tha        | 0 | 60  | N | Pass        |
| 513428 | F | Tigrai Region A Level or I | 1 | 120 | N | Fail        |



|        |   |                          |   |     |   |             |
|--------|---|--------------------------|---|-----|---|-------------|
| 514096 | M | South Regi A Level or I  | 0 | 60  | N | Fail        |
| 514580 | F | Somalia Re A Level or I  | 0 | 120 | N | Pass        |
| 514605 | M | Somalia Re Lower Than    | 1 | 180 | N | Withdrawn   |
| 514675 | M | South Wes A Level or I   | 0 | 180 | N | Pass        |
| 514756 | F | South Regi A Level or I  | 0 | 90  | N | Pass        |
| 514903 | M | Somalia Re A Level or I  | 0 | 150 | Y | Pass        |
| 514913 | M | Sidamo Re Lower Than     | 0 | 120 | Y | Withdrawn   |
| 514969 | M | North Regi A Level or I  | 1 | 300 | N | Pass        |
| 515070 | M | Sidamo Re Lower Than     | 1 | 180 | N | Fail        |
| 515370 | M | Amhara Re Lower Than     | 0 | 210 | N | Withdrawn   |
| 515844 | M | South Regi Lower Than    | 1 | 120 | N | Fail        |
| 515938 | M | South Wes HE Qualific    | 0 | 90  | N | Pass        |
| 516222 | M | North Regi Lower Than    | 1 | 180 | N | Withdrawn   |
| 516435 | M | South Wes A Level or I   | 0 | 60  | N | Fail        |
| 516519 | M | Sidamo Re Lower Than     | 1 | 150 | Y | Withdrawn   |
| 517062 | F | South Regi A Level or I  | 0 | 60  | N | Withdrawn   |
| 517195 | M | Sidamo Re Lower Than     | 1 | 120 | N | Fail        |
| 517269 | M | Sidamo Re Lower Than     | 1 | 180 | Y | Pass        |
| 517349 | M | Sidamo Re A Level or I   | 0 | 120 | N | Withdrawn   |
| 517362 | M | South Wes No Formal      | 1 | 120 | N | Withdrawn   |
| 517486 | M | Sidamo Re Lower Than     | 0 | 60  | N | Fail        |
| 517569 | M | Amhara Re A Level or I   | 0 | 60  | N | Pass        |
| 517850 | F | North Regi Lower Than    | 1 | 210 | Y | Fail        |
| 518288 | M | Amhara Re A Level or I   | 0 | 120 | N | Fail        |
| 518385 | M | Sidamo Re Lower Than     | 1 | 180 | Y | Withdrawn   |
| 518412 | F | Amhara Re A Level or I   | 0 | 120 | N | Pass        |
| 518771 | M | Tigrai Regi Lower Than   | 1 | 120 | N | Fail        |
| 518831 | F | South Wes Lower Than     | 0 | 60  | N | Pass        |
| 519155 | M | Addis Abak Lower Than    | 1 | 120 | Y | Withdrawn   |
| 519472 | M | South Regi A Level or I  | 0 | 60  | N | Pass        |
| 519500 | M | Oromia Re Lower Than     | 0 | 120 | Y | Withdrawn   |
| 519510 | M | South Regi Lower Than    | 0 | 120 | N | Pass        |
| 519540 | M | Addis Abak A Level or I  | 0 | 60  | N | Fail        |
| 519600 | F | Sidamo Re A Level or I   | 0 | 90  | N | Withdrawn   |
| 519715 | M | Afar Regio A Level or I  | 1 | 120 | N | Pass        |
| 519936 | M | Amhara Re Lower Than     | 0 | 150 | N | Pass        |
| 519969 | F | South Regi Lower Than    | 0 | 60  | N | Fail        |
| 520061 | M | North Regi Lower Than    | 0 | 120 | N | Withdrawn   |
| 520073 | M | Addis Abak Lower Than    | 1 | 180 | N | Fail        |
| 520082 | M | Tigrai Regi A Level or I | 0 | 60  | N | Pass        |
| 520097 | M | Sidamo Re HE Qualific    | 0 | 120 | N | Distinction |
| 520153 | F | South Regi Lower Than    | 0 | 400 | N | Withdrawn   |
| 520187 | M | South Regi Lower Than    | 0 | 60  | N | Pass        |
| 520307 | M | Addis Abak A Level or I  | 1 | 120 | N | Withdrawn   |
| 520360 | F | South Regi HE Qualific   | 0 | 120 | N | Withdrawn   |
| 520525 | M | North Regi A Level or I  | 0 | 60  | N | Withdrawn   |
| 520544 | M | Tigrai Regi Lower Than   | 0 | 120 | N | Fail        |

|        |   |                        |   |     |   |             |
|--------|---|------------------------|---|-----|---|-------------|
| 520711 | F | Sidamo Re Lower Than   | 0 | 120 | N | Fail        |
| 520857 | M | Oromia Re A Level or   | 1 | 120 | N | Fail        |
| 520873 | M | Addis Abak Lower Than  | 0 | 120 | N | Withdrawn   |
| 521109 | M | South Regi Lower Than  | 1 | 180 | N | Withdrawn   |
| 521377 | M | South Wes A Level or   | 0 | 150 | N | Withdrawn   |
| 521526 | M | South Regi A Level or  | 0 | 120 | N | Pass        |
| 522023 | F | Afar Regio HE Qualific | 1 | 150 | N | Fail        |
| 522433 | F | Sidamo Re A Level or   | 0 | 60  | N | Fail        |
| 522479 | M | Sidamo Re Lower Than   | 1 | 120 | N | Fail        |
| 522718 | M | Sidamo Re Lower Than   | 1 | 150 | N | Pass        |
| 522743 | M | South Wes Lower Than   | 0 | 60  | N | Pass        |
| 522850 | M | South Wes Lower Than   | 0 | 120 | N | Pass        |
| 522859 | M | Oromia Re A Level or   | 0 | 60  | N | Pass        |
| 522862 | M | Tigrai Regi A Level or | 1 | 180 | N | Withdrawn   |
| 522923 | M | Amhara Re Lower Than   | 1 | 120 | N | Pass        |
| 523142 | M | South Regi Lower Than  | 1 | 120 | N | Fail        |
| 523335 | M | South Wes HE Qualific  | 0 | 60  | N | Fail        |
| 523700 | M | Afar Regio A Level or  | 0 | 90  | N | Fail        |
| 523833 | M | Somalia Re Lower Than  | 0 | 120 | N | Pass        |
| 523841 | M | Sidamo Re A Level or   | 0 | 120 | N | Fail        |
| 523940 | M | Amhara Re A Level or   | 0 | 60  | N | Distinction |
| 524227 | M | Addis Abak A Level or  | 0 | 60  | N | Pass        |
| 524361 | M | Sidamo Re HE Qualific  | 1 | 180 | N | Pass        |
| 524377 | F | Oromia Re A Level or   | 0 | 60  | Y | Pass        |
| 524431 | F | South Regi A Level or  | 0 | 60  | N | Withdrawn   |
| 524466 | M | South Regi A Level or  | 1 | 150 | N | Pass        |
| 524609 | M | South Regi Lower Than  | 1 | 120 | N | Withdrawn   |
| 524825 | M | Amhara Re A Level or   | 0 | 60  | N | Pass        |
| 524984 | F | Somalia Re Lower Than  | 0 | 120 | N | Withdrawn   |
| 525353 | M | South Regi A Level or  | 0 | 120 | N | Withdrawn   |
| 525412 | M | Sidamo Re Lower Than   | 0 | 60  | N | Pass        |
| 525469 | M | North Regi Lower Than  | 1 | 120 | N | Pass        |
| 525490 | M | Somalia Re A Level or  | 0 | 120 | N | Fail        |
| 525512 | M | Somalia Re A Level or  | 1 | 120 | N | Pass        |
| 525557 | M | Somalia Re Lower Than  | 1 | 180 | N | Fail        |
| 525624 | M | Sidamo Re HE Qualific  | 0 | 120 | N | Pass        |
| 525632 | M | South Wes A Level or   | 1 | 210 | N | Pass        |
| 525700 | F | Sidamo Re A Level or   | 0 | 120 | N | Distinction |
| 526060 | M | Sidamo Re Lower Than   | 0 | 60  | N | Withdrawn   |
| 526151 | M | South Wes A Level or   | 1 | 150 | N | Pass        |
| 526303 | M | South Wes HE Qualific  | 1 | 120 | N | Withdrawn   |
| 526356 | M | Sidamo Re A Level or   | 1 | 150 | N | Withdrawn   |
| 526417 | F | Sidamo Re A Level or   | 0 | 60  | N | Distinction |
| 526420 | M | Somalia Re Lower Than  | 0 | 120 | N | Withdrawn   |
| 526527 | M | Sidamo Re Lower Than   | 0 | 60  | N | Fail        |
| 526549 | M | South Regi A Level or  | 1 | 180 | N | Pass        |
| 526551 | M | Addis Abak A Level or  | 0 | 60  | N | Pass        |

|        |   |                           |   |     |   |             |
|--------|---|---------------------------|---|-----|---|-------------|
| 526559 | F | Sidamo Re Lower Tha       | 1 | 180 | N | Pass        |
| 526589 | M | Addis Abak Lower Tha      | 1 | 120 | N | Fail        |
| 526761 | F | Oromia Re A Level or I    | 0 | 60  | N | Fail        |
| 526818 | M | Amhara Re Lower Tha       | 0 | 60  | N | Pass        |
| 526819 | M | Sidamo Re A Level or I    | 1 | 150 | N | Fail        |
| 526896 | M | Tigrai Regio Lower Tha    | 0 | 60  | Y | Pass        |
| 526927 | M | Afar Regio A Level or I   | 0 | 120 | N | Pass        |
| 526980 | M | Addis Abak Lower Tha      | 0 | 60  | N | Fail        |
| 527225 | F | South Wes HE Qualific     | 0 | 120 | N | Pass        |
| 527505 | M | South Wes Lower Tha       | 0 | 90  | N | Withdrawn   |
| 527601 | F | South Regi Lower Tha      | 0 | 60  | N | Withdrawn   |
| 527622 | M | Amhara Re Lower Tha       | 0 | 60  | N | Pass        |
| 527685 | M | South Regi Lower Tha      | 1 | 120 | Y | Fail        |
| 527744 | F | Tigrai Regio A Level or I | 0 | 60  | N | Withdrawn   |
| 527927 | M | North Regi Lower Tha      | 1 | 180 | N | Withdrawn   |
| 527991 | M | Oromia Re A Level or I    | 1 | 120 | N | Fail        |
| 528071 | M | Sidamo Re Lower Tha       | 0 | 60  | Y | Withdrawn   |
| 528075 | M | Sidamo Re A Level or I    | 0 | 60  | N | Distinction |
| 528264 | M | Sidamo Re A Level or I    | 1 | 120 | N | Withdrawn   |
| 528270 | F | South Wes Lower Tha       | 0 | 180 | N | Withdrawn   |
| 528302 | M | North Regi Lower Tha      | 0 | 90  | N | Fail        |
| 528351 | M | Amhara Re A Level or I    | 1 | 120 | N | Distinction |
| 528424 | M | Sidamo Re A Level or I    | 0 | 60  | N | Fail        |
| 528509 | M | South Regi HE Qualific    | 0 | 60  | N | Fail        |
| 528517 | M | South Regi A Level or I   | 0 | 60  | N | Pass        |
| 528662 | M | Somalia Re Lower Tha      | 0 | 60  | N | Fail        |
| 528713 | M | Sidamo Re Lower Tha       | 0 | 60  | N | Withdrawn   |
| 528734 | M | Oromia Re Lower Tha       | 1 | 120 | N | Pass        |
| 528782 | M | Sidamo Re A Level or I    | 0 | 60  | N | Withdrawn   |
| 528879 | M | Sidamo Re A Level or I    | 0 | 120 | N | Withdrawn   |
| 528992 | M | South Regi A Level or I   | 0 | 90  | N | Pass        |
| 528996 | F | Amhara Re No Formal       | 0 | 120 | N | Withdrawn   |
| 529030 | M | Sidamo Re A Level or I    | 1 | 120 | N | Pass        |
| 529097 | M | South Wes A Level or I    | 0 | 60  | N | Pass        |
| 529175 | M | Amhara Re Lower Tha       | 0 | 60  | N | Fail        |
| 529240 | M | Afar Regio A Level or I   | 1 | 120 | N | Pass        |
| 529277 | M | Amhara Re A Level or I    | 1 | 120 | N | Withdrawn   |
| 529297 | M | South Regi HE Qualific    | 0 | 60  | N | Pass        |
| 529349 | F | Addis Abak A Level or I   | 1 | 150 | N | Distinction |
| 529366 | M | South Regi Lower Tha      | 0 | 150 | N | Pass        |
| 529381 | M | Sidamo Re Lower Tha       | 0 | 60  | N | Withdrawn   |
| 529412 | M | Somalia Re Lower Tha      | 1 | 180 | N | Fail        |
| 529486 | M | Somalia Re Lower Tha      | 0 | 90  | N | Pass        |
| 529493 | M | Addis Abak A Level or I   | 0 | 60  | Y | Pass        |
| 529561 | M | South Regi A Level or I   | 0 | 120 | N | Distinction |
| 529563 | M | South Regi A Level or I   | 0 | 120 | N | Pass        |
| 529565 | M | South Wes A Level or I    | 0 | 120 | N | Pass        |

|        |   |                         |   |     |   |             |
|--------|---|-------------------------|---|-----|---|-------------|
| 529566 | M | South Regi A Level or I | 0 | 120 | N | Pass        |
| 529567 | M | South Regi A Level or I | 0 | 120 | N | Distinction |
| 529569 | F | Sidamo Re No Formal     | 0 | 120 | N | Pass        |
| 529572 | M | Addis Abak A Level or I | 0 | 120 | N | Fail        |
| 529644 | M | South Regi A Level or I | 1 | 120 | N | Pass        |
| 529689 | M | Afar Regio Lower Than   | 0 | 60  | N | Pass        |
| 529762 | F | South Wes Lower Than    | 0 | 60  | N | Pass        |
| 529834 | M | South Regi Lower Than   | 0 | 60  | N | Fail        |
| 529864 | M | Sidamo Re Lower Than    | 0 | 120 | N | Fail        |
| 529870 | M | North Regi A Level or I | 1 | 120 | N | Distinction |
| 529871 | M | Addis Abak A Level or I | 1 | 150 | N | Pass        |
| 529991 | M | South Regi Lower Than   | 1 | 120 | N | Fail        |
| 530057 | M | South Regi Lower Than   | 0 | 90  | N | Pass        |
| 530296 | M | South Regi A Level or I | 1 | 120 | N | Pass        |
| 530344 | F | Afar Regio A Level or I | 0 | 75  | N | Pass        |
| 530445 | F | Sidamo Re Post Gradu    | 0 | 60  | N | Distinction |
| 530558 | M | South Wes Lower Than    | 0 | 60  | N | Pass        |
| 530567 | M | Tigrai Regi HE Qualific | 1 | 120 | N | Distinction |
| 530676 | M | Somalia Re Lower Than   | 0 | 120 | N | Withdrawn   |
| 530736 | M | South Regi HE Qualific  | 1 | 180 | N | Pass        |
| 530802 | M | South Regi Lower Than   | 0 | 60  | N | Distinction |
| 530852 | M | Tigrai Regi Lower Than  | 0 | 120 | N | Withdrawn   |
| 530853 | M | Somalia Re Lower Than   | 0 | 120 | N | Fail        |
| 530862 | M | South Regi A Level or I | 0 | 120 | N | Pass        |
| 530944 | M | Oromia Re A Level or I  | 0 | 90  | N | Distinction |
| 531077 | M | Somalia Re A Level or I | 0 | 60  | N | Distinction |
| 531124 | M | South Regi A Level or I | 0 | 60  | N | Pass        |
| 531182 | M | Sidamo Re Lower Than    | 1 | 120 | N | Pass        |
| 531190 | M | Somalia Re A Level or I | 0 | 180 | N | Pass        |
| 531251 | M | Afar Regio HE Qualific  | 0 | 120 | N | Withdrawn   |
| 531270 | M | North Regi A Level or I | 1 | 120 | N | Pass        |
| 531294 | M | North Regi A Level or I | 1 | 120 | N | Pass        |
| 531397 | F | Oromia Re Lower Than    | 0 | 60  | N | Fail        |
| 531448 | M | South Regi A Level or I | 0 | 60  | N | Fail        |
| 531629 | M | Sidamo Re HE Qualific   | 0 | 60  | N | Pass        |
| 531667 | M | South Regi A Level or I | 0 | 120 | N | Withdrawn   |
| 531709 | M | South Wes Lower Than    | 0 | 90  | N | Distinction |
| 531791 | F | Afar Regio A Level or I | 0 | 120 | N | Fail        |
| 531866 | M | Sidamo Re A Level or I  | 0 | 60  | N | Withdrawn   |
| 531894 | M | Somalia Re A Level or I | 1 | 180 | N | Withdrawn   |
| 531905 | F | Oromia Re No Formal     | 0 | 180 | N | Pass        |
| 532049 | M | Amhara Re Lower Than    | 0 | 60  | N | Fail        |
| 532050 | M | Afar Regio HE Qualific  | 0 | 60  | N | Fail        |
| 532062 | M | Addis Abak Lower Than   | 1 | 120 | N | Withdrawn   |
| 532428 | M | South Wes Lower Than    | 0 | 120 | N | Fail        |
| 532436 | F | Sidamo Re HE Qualific   | 0 | 120 | N | Pass        |
| 532464 | M | Sidamo Re A Level or I  | 0 | 120 | N | Fail        |

|        |   |                         |   |     |   |             |
|--------|---|-------------------------|---|-----|---|-------------|
| 532476 | M | North Regi A Level or I | 0 | 60  | N | Withdrawn   |
| 532575 | M | South Regi Lower Tha    | 0 | 120 | N | Withdrawn   |
| 532578 | M | Amhara Re A Level or I  | 0 | 60  | N | Pass        |
| 532579 | M | Amhara Re A Level or I  | 0 | 60  | N | Pass        |
| 532589 | M | Addis Abak A Level or I | 0 | 120 | N | Fail        |
| 532608 | M | Sidamo Re Lower Tha     | 0 | 60  | N | Pass        |
| 532627 | M | South Regi Lower Tha    | 0 | 60  | N | Pass        |
| 532703 | M | Sidamo Re Lower Tha     | 0 | 60  | N | Withdrawn   |
| 532715 | F | Afar Regio Lower Tha    | 0 | 120 | N | Pass        |
| 532968 | M | Tigrai Regi HE Qualific | 1 | 120 | N | Pass        |
| 533016 | M | South Regi A Level or I | 0 | 60  | N | Withdrawn   |
| 533044 | M | North Regi A Level or I | 0 | 60  | N | Pass        |
| 533134 | M | Amhara Re A Level or I  | 0 | 90  | N | Pass        |
| 533172 | M | South Wes A Level or I  | 0 | 60  | N | Pass        |
| 533198 | F | Addis Abak Lower Tha    | 0 | 120 | Y | Withdrawn   |
| 533201 | M | Addis Abak Lower Tha    | 0 | 120 | N | Pass        |
| 533321 | M | Somalia Re Lower Tha    | 0 | 60  | N | Distinction |
| 533348 | M | North Regi Lower Tha    | 0 | 90  | N | Withdrawn   |
| 533458 | M | Amhara Re A Level or I  | 0 | 120 | N | Withdrawn   |
| 533485 | M | Somalia Re Lower Tha    | 0 | 60  | N | Pass        |
| 533535 | M | South Wes HE Qualific   | 0 | 180 | N | Pass        |
| 533614 | M | South Wes A Level or I  | 0 | 60  | N | Distinction |
| 533709 | M | Somalia Re A Level or I | 0 | 120 | Y | Fail        |
| 533874 | M | Sidamo Re A Level or I  | 0 | 90  | N | Withdrawn   |
| 533929 | M | Somalia Re A Level or I | 0 | 90  | N | Distinction |
| 533944 | M | Amhara Re Lower Tha     | 0 | 60  | N | Withdrawn   |
| 533997 | M | South Wes Lower Tha     | 0 | 60  | N | Withdrawn   |
| 534014 | M | Sidamo Re Lower Tha     | 0 | 180 | N | Fail        |
| 534037 | M | Addis Abak Lower Tha    | 0 | 60  | N | Pass        |
| 534064 | M | Afar Regio Lower Tha    | 0 | 120 | N | Pass        |
| 534234 | M | Sidamo Re Lower Tha     | 0 | 60  | N | Fail        |
| 534346 | M | South Regi A Level or I | 0 | 60  | N | Fail        |
| 534431 | F | South Regi HE Qualific  | 0 | 60  | N | Pass        |
| 534602 | M | South Wes A Level or I  | 0 | 60  | N | Distinction |
| 534609 | M | Afar Regio Lower Tha    | 0 | 60  | N | Fail        |
| 534750 | M | Somalia Re A Level or I | 0 | 120 | N | Fail        |
| 534784 | M | Amhara Re Lower Tha     | 0 | 60  | N | Pass        |
| 534792 | F | South Wes Lower Tha     | 0 | 120 | N | Pass        |
| 534854 | M | Sidamo Re A Level or I  | 0 | 120 | Y | Fail        |
| 534856 | M | South Wes A Level or I  | 0 | 60  | N | Pass        |
| 534892 | M | South Wes A Level or I  | 0 | 90  | N | Fail        |
| 534913 | M | South Wes A Level or I  | 0 | 120 | N | Pass        |
| 534944 | F | Somalia Re Lower Tha    | 0 | 90  | N | Withdrawn   |
| 534952 | M | South Wes A Level or I  | 0 | 60  | N | Pass        |
| 534958 | M | South Regi A Level or I | 0 | 60  | N | Pass        |
| 534962 | F | South Regi Lower Tha    | 0 | 60  | Y | Withdrawn   |
| 534989 | M | Somalia Re Lower Tha    | 0 | 60  | N | Pass        |

|        |   |                         |   |     |   |             |
|--------|---|-------------------------|---|-----|---|-------------|
| 535037 | M | Afar Region Post Gradu  | 0 | 60  | N | Pass        |
| 535052 | M | South Wes Lower Thar    | 0 | 60  | N | Withdrawn   |
| 535228 | M | South Regi A Level or I | 0 | 60  | N | Withdrawn   |
| 535276 | M | South Wes A Level or I  | 0 | 60  | N | Withdrawn   |
| 535324 | M | South Regi Lower Thar   | 0 | 60  | Y | Fail        |
| 535390 | M | Tigray Regi Lower Thar  | 0 | 60  | N | Withdrawn   |
| 535460 | M | Sidamo Re A Level or I  | 0 | 90  | N | Fail        |
| 535628 | M | South Wes A Level or I  | 0 | 60  | N | Pass        |
| 535662 | M | Addis Abak HE Qualific  | 0 | 60  | N | Pass        |
| 535761 | M | Sidamo Re Lower Thar    | 0 | 90  | N | Withdrawn   |
| 535804 | M | Addis Abak A Level or I | 0 | 60  | N | Pass        |
| 535981 | F | Sidamo Re Lower Thar    | 0 | 120 | N | Withdrawn   |
| 536038 | M | South Regi A Level or I | 0 | 120 | N | Withdrawn   |
| 536046 | M | Oromia Re Lower Thar    | 0 | 120 | N | Fail        |
| 536103 | M | Afar Region HE Qualific | 0 | 150 | N | Withdrawn   |
| 536125 | M | South Wes A Level or I  | 0 | 90  | N | Pass        |
| 536147 | M | Sidamo Re Lower Thar    | 0 | 60  | N | Fail        |
| 536178 | M | South Wes A Level or I  | 0 | 60  | N | Distinction |
| 536214 | M | Somalia Re A Level or I | 0 | 60  | N | Pass        |
| 536454 | M | Amhara Re HE Qualific   | 0 | 60  | N | Withdrawn   |
| 536455 | M | Addis Abak A Level or I | 0 | 120 | N | Pass        |
| 536503 | M | Addis Abak Lower Thar   | 0 | 60  | N | Withdrawn   |
| 536556 | M | South Regi Lower Thar   | 0 | 60  | Y | Pass        |
| 536591 | M | Addis Abak A Level or I | 0 | 60  | N | Fail        |
| 536593 | M | South Wes HE Qualific   | 0 | 70  | N | Pass        |
| 536681 | M | Amhara Re No Formal     | 0 | 60  | N | Withdrawn   |
| 536698 | M | North Regi A Level or I | 0 | 60  | N | Pass        |
| 536843 | M | Amhara Re HE Qualific   | 0 | 60  | N | Fail        |
| 536906 | F | South Regi A Level or I | 0 | 120 | N | Pass        |
| 536930 | M | Sidamo Re A Level or I  | 0 | 60  | N | Pass        |
| 536950 | F | Sidamo Re HE Qualific   | 0 | 60  | N | Pass        |
| 537000 | F | Sidamo Re A Level or I  | 0 | 120 | N | Withdrawn   |
| 537028 | M | Afar Region Lower Thar  | 0 | 75  | N | Withdrawn   |
| 537133 | F | Oromia Re Lower Thar    | 0 | 60  | Y | Withdrawn   |
| 537151 | M | Sidamo Re Lower Thar    | 0 | 120 | N | Withdrawn   |
| 537335 | F | Sidamo Re No Formal     | 0 | 60  | N | Withdrawn   |
| 537394 | M | Sidamo Re A Level or I  | 0 | 60  | N | Withdrawn   |
| 537515 | M | Addis Abak Lower Thar   | 0 | 60  | N | Pass        |
| 537645 | M | North Regi HE Qualific  | 0 | 60  | N | Pass        |
| 537656 | M | South Wes HE Qualific   | 0 | 60  | N | Pass        |
| 537672 | M | Sidamo Re Lower Thar    | 0 | 120 | N | Fail        |
| 537674 | M | Sidamo Re Lower Thar    | 0 | 120 | Y | Fail        |
| 537683 | M | South Regi A Level or I | 0 | 120 | N | Fail        |
| 537687 | M | North Regi Lower Thar   | 0 | 60  | N | Pass        |
| 537700 | M | Afar Region Post Gradu  | 0 | 60  | N | Fail        |
| 537728 | M | North Regi A Level or I | 0 | 90  | N | Withdrawn   |
| 537955 | M | North Regi HE Qualific  | 0 | 120 | N | Pass        |

|        |   |                          |   |     |   |             |
|--------|---|--------------------------|---|-----|---|-------------|
| 537980 | M | Afar Region HE Qualific  | 0 | 60  | N | Pass        |
| 537995 | M | Oromia Re Lower Than     | 0 | 60  | N | Fail        |
| 538045 | M | Addis Ababa A Level or   | 0 | 60  | N | Pass        |
| 538051 | M | South Region A Level or  | 0 | 90  | N | Fail        |
| 538202 | M | Somalia Re Lower Than    | 0 | 60  | Y | Pass        |
| 538916 | M | Somalia Re A Level or    | 0 | 150 | N | Pass        |
| 538941 | M | South Region A Level or  | 0 | 60  | N | Pass        |
| 538949 | F | Oromia Re Lower Than     | 0 | 60  | N | Pass        |
| 539117 | M | North Region A Level or  | 0 | 60  | N | Fail        |
| 539128 | M | Oromia Re Lower Than     | 0 | 120 | N | Withdrawn   |
| 539219 | M | Sidamo Re A Level or     | 0 | 120 | N | Fail        |
| 539241 | M | Afar Region A Level or   | 0 | 120 | N | Pass        |
| 539308 | M | South Region A Level or  | 0 | 90  | N | Fail        |
| 539332 | M | Afar Region HE Qualific  | 0 | 60  | N | Pass        |
| 539359 | M | Afar Region HE Qualific  | 0 | 90  | N | Distinction |
| 539364 | M | Amhara Re A Level or     | 0 | 90  | N | Fail        |
| 539401 | M | Sidamo Re A Level or     | 0 | 60  | N | Withdrawn   |
| 539440 | M | South Region Lower Than  | 0 | 60  | N | Distinction |
| 539468 | F | Tigray Region Lower Than | 0 | 60  | N | Fail        |
| 539497 | M | South West A Level or    | 0 | 60  | N | Pass        |
| 539514 | F | North Region Lower Than  | 0 | 60  | N | Pass        |
| 539668 | M | South Region A Level or  | 0 | 90  | N | Withdrawn   |
| 539759 | M | South Region Lower Than  | 0 | 60  | N | Pass        |
| 539774 | M | Sidamo Re A Level or     | 0 | 60  | N | Withdrawn   |
| 539886 | M | Amhara Re Lower Than     | 0 | 120 | Y | Fail        |
| 539896 | M | Addis Ababa Lower Than   | 0 | 60  | N | Pass        |
| 539922 | F | Afar Region HE Qualific  | 0 | 60  | N | Withdrawn   |
| 539953 | M | Sidamo Re A Level or     | 0 | 60  | N | Fail        |
| 539963 | M | Addis Ababa A Level or   | 0 | 120 | N | Pass        |
| 539994 | M | Sidamo Re A Level or     | 0 | 120 | N | Fail        |
| 540054 | M | Oromia Re A Level or     | 0 | 60  | N | Pass        |
| 540147 | M | Oromia Re A Level or     | 0 | 60  | N | Fail        |
| 540155 | M | Sidamo Re Lower Than     | 0 | 90  | N | Withdrawn   |
| 540160 | M | Amhara Re A Level or     | 0 | 60  | N | Pass        |
| 540209 | M | Afar Region Lower Than   | 0 | 60  | Y | Pass        |
| 540224 | M | North Region Lower Than  | 0 | 60  | N | Pass        |
| 540549 | M | Amhara Re Lower Than     | 0 | 120 | N | Pass        |
| 540577 | M | South West A Level or    | 0 | 120 | N | Pass        |
| 540581 | M | South Region HE Qualific | 0 | 120 | N | Fail        |
| 540637 | M | Addis Ababa Lower Than   | 0 | 120 | N | Withdrawn   |
| 540713 | M | Sidamo Re A Level or     | 0 | 120 | N | Pass        |
| 540727 | M | Sidamo Re HE Qualific    | 0 | 60  | N | Pass        |
| 540800 | M | Sidamo Re A Level or     | 0 | 90  | Y | Pass        |
| 540801 | M | Afar Region HE Qualific  | 0 | 90  | N | Withdrawn   |
| 540997 | M | Tigray Region A Level or | 0 | 60  | N | Withdrawn   |
| 541101 | M | North Region A Level or  | 0 | 60  | N | Fail        |
| 541327 | F | Afar Region Lower Than   | 0 | 120 | N | Withdrawn   |

|        |   |                         |   |     |   |             |
|--------|---|-------------------------|---|-----|---|-------------|
| 541349 | M | South Wes Lower Tha     | 0 | 120 | N | Pass        |
| 541369 | M | South Wes Lower Tha     | 0 | 60  | N | Withdrawn   |
| 541418 | M | Sidamo Re Lower Tha     | 0 | 60  | N | Pass        |
| 541521 | M | South Wes HE Qualific   | 0 | 60  | N | Pass        |
| 541579 | M | Sidamo Re A Level or I  | 0 | 90  | N | Distinction |
| 541753 | M | Addis Abak A Level or I | 0 | 60  | N | Pass        |
| 541781 | M | South Regi A Level or I | 0 | 150 | N | Pass        |
| 541923 | M | Afar Regio Lower Tha    | 0 | 60  | N | Fail        |
| 541999 | M | Amhara Re A Level or I  | 0 | 120 | N | Fail        |
| 542003 | M | South Wes Lower Tha     | 0 | 60  | N | Pass        |
| 542020 | M | South Regi A Level or I | 0 | 90  | N | Pass        |
| 542026 | M | Sidamo Re A Level or I  | 0 | 60  | N | Fail        |
| 542062 | M | Sidamo Re Lower Tha     | 0 | 60  | N | Withdrawn   |
| 542100 | M | Amhara Re Lower Tha     | 0 | 60  | N | Pass        |
| 542356 | M | Afar Regio HE Qualific  | 0 | 60  | N | Fail        |
| 542386 | M | South Wes A Level or I  | 0 | 120 | N | Distinction |
| 542506 | M | South Wes Lower Tha     | 0 | 60  | N | Distinction |
| 542536 | M | Sidamo Re Lower Tha     | 0 | 90  | N | Pass        |
| 542550 | M | North Regi A Level or I | 0 | 60  | N | Withdrawn   |
| 542635 | M | South Regi A Level or I | 0 | 60  | N | Pass        |
| 542646 | F | South Wes A Level or I  | 0 | 60  | N | Pass        |
| 542653 | M | Oromia Re A Level or I  | 0 | 60  | N | Pass        |
| 542657 | F | Oromia Re Lower Tha     | 0 | 120 | N | Withdrawn   |
| 542987 | M | South Regi Lower Tha    | 0 | 120 | N | Fail        |
| 543010 | M | Addis Abak HE Qualific  | 0 | 60  | N | Fail        |
| 543019 | M | South Wes A Level or I  | 0 | 60  | N | Pass        |
| 543054 | M | Tigrai Regi Lower Tha   | 0 | 60  | N | Fail        |
| 543095 | M | South Regi Lower Tha    | 0 | 60  | N | Withdrawn   |
| 543113 | M | South Regi A Level or I | 0 | 120 | N | Fail        |
| 543155 | M | Sidamo Re Lower Tha     | 0 | 90  | N | Withdrawn   |
| 543295 | M | Tigrai Regi HE Qualific | 0 | 60  | N | Fail        |
| 543384 | M | Amhara Re Lower Tha     | 0 | 60  | N | Distinction |
| 543415 | M | South Regi Lower Tha    | 0 | 90  | Y | Pass        |
| 543436 | M | Amhara Re A Level or I  | 0 | 120 | N | Fail        |
| 543447 | M | Somalia Re Lower Tha    | 0 | 60  | N | Pass        |
| 543536 | M | South Wes Lower Tha     | 0 | 150 | N | Fail        |
| 543599 | M | Somalia Re A Level or I | 0 | 60  | N | Pass        |
| 543604 | M | Addis Abak A Level or I | 0 | 120 | N | Withdrawn   |
| 543643 | F | South Regi A Level or I | 0 | 60  | Y | Pass        |
| 543785 | M | North Regi Lower Tha    | 0 | 90  | N | Withdrawn   |
| 543798 | M | Somalia Re Lower Tha    | 0 | 60  | N | Pass        |
| 543818 | M | Sidamo Re Lower Tha     | 0 | 90  | N | Fail        |
| 544021 | M | South Regi Lower Tha    | 0 | 120 | N | Withdrawn   |
| 544055 | M | Oromia Re HE Qualific   | 0 | 210 | N | Pass        |
| 544098 | M | Afar Regio Lower Tha    | 0 | 60  | N | Pass        |
| 544173 | F | Addis Abak Lower Tha    | 0 | 130 | Y | Distinction |
| 544195 | M | South Wes Lower Tha     | 0 | 60  | N | Fail        |



|        |   |             |              |   |     |   |             |
|--------|---|-------------|--------------|---|-----|---|-------------|
| 544212 | F | North Regi  | A Level or l | 0 | 60  | N | Pass        |
| 544249 | M | Amhara Re   | A Level or l | 0 | 60  | N | Pass        |
| 544279 | M | Sidamo Re   | Lower Than   | 0 | 60  | N | Fail        |
| 544295 | M | South Regi  | A Level or l | 0 | 60  | Y | Pass        |
| 544313 | M | South Wes   | A Level or l | 0 | 120 | N | Pass        |
| 544479 | F | Afar Regio  | HE Qualific  | 0 | 60  | N | Pass        |
| 544530 | M | Afar Regio  | A Level or l | 0 | 60  | N | Pass        |
| 544543 | M | North Regi  | A Level or l | 0 | 60  | N | Fail        |
| 544651 | F | Sidamo Re   | Lower Than   | 0 | 120 | Y | Withdrawn   |
| 544697 | M | Tigrai Regi | Lower Than   | 0 | 60  | N | Fail        |
| 544802 | M | Somalia Re  | Lower Than   | 0 | 120 | N | Withdrawn   |
| 544847 | M | Afar Regio  | HE Qualific  | 0 | 120 | Y | Fail        |
| 544850 | M | Afar Regio  | Lower Than   | 0 | 90  | Y | Pass        |
| 544880 | M | South Regi  | Lower Than   | 0 | 120 | N | Fail        |
| 544894 | M | South Regi  | Lower Than   | 0 | 60  | N | Pass        |
| 544930 | M | South Regi  | A Level or l | 0 | 60  | N | Withdrawn   |
| 544955 | M | Amhara Re   | A Level or l | 0 | 60  | N | Withdrawn   |
| 544963 | M | Oromia Re   | A Level or l | 0 | 60  | N | Pass        |
| 544991 | M | Amhara Re   | A Level or l | 0 | 120 | N | Pass        |
| 545048 | F | Amhara Re   | A Level or l | 0 | 60  | N | Fail        |
| 545080 | M | South Regi  | A Level or l | 0 | 60  | N | Fail        |
| 545229 | M | Amhara Re   | HE Qualific  | 0 | 60  | N | Distinction |
| 545377 | M | South Regi  | A Level or l | 0 | 60  | N | Fail        |
| 545379 | M | South Regi  | A Level or l | 0 | 60  | N | Pass        |
| 545384 | M | Somalia Re  | Lower Than   | 0 | 120 | N | Fail        |
| 545485 | M | South Regi  | A Level or l | 0 | 90  | N | Withdrawn   |
| 545522 | M | North Regi  | Lower Than   | 0 | 90  | N | Withdrawn   |
| 545565 | M | Oromia Re   | A Level or l | 0 | 120 | N | Withdrawn   |
| 545600 | M | Afar Regio  | A Level or l | 0 | 60  | N | Withdrawn   |
| 545604 | M | Sidamo Re   | A Level or l | 0 | 90  | N | Fail        |
| 545693 | M | Addis Abat  | A Level or l | 0 | 90  | Y | Withdrawn   |
| 545720 | M | North Regi  | A Level or l | 0 | 90  | N | Fail        |
| 545751 | M | South Regi  | Lower Than   | 0 | 90  | N | Fail        |
| 545791 | M | South Regi  | Lower Than   | 0 | 120 | Y | Withdrawn   |
| 545909 | M | Afar Regio  | Lower Than   | 0 | 120 | N | Pass        |
| 545918 | M | South Regi  | Lower Than   | 0 | 120 | N | Withdrawn   |
| 545944 | M | Tigrai Regi | A Level or l | 0 | 120 | N | Withdrawn   |
| 545951 | F | Tigrai Regi | A Level or l | 0 | 60  | N | Withdrawn   |
| 546048 | M | Tigrai Regi | A Level or l | 0 | 60  | N | Fail        |
| 546141 | M | Sidamo Re   | No Formal    | 0 | 60  | N | Fail        |
| 546164 | M | South Regi  | Lower Than   | 0 | 60  | N | Withdrawn   |
| 546215 | M | Sidamo Re   | Lower Than   | 0 | 60  | N | Pass        |
| 546243 | M | Sidamo Re   | Lower Than   | 0 | 60  | N | Withdrawn   |
| 546262 | M | South Regi  | A Level or l | 0 | 120 | N | Withdrawn   |
| 546329 | M | Somalia Re  | A Level or l | 0 | 60  | Y | Fail        |
| 546348 | F | Sidamo Re   | A Level or l | 0 | 60  | N | Pass        |
| 546396 | M | Addis Abat  | A Level or l | 0 | 60  | N | Withdrawn   |

|        |   |                          |   |     |   |             |
|--------|---|--------------------------|---|-----|---|-------------|
| 546408 | M | South Wes Lower Thai     | 0 | 60  | N | Fail        |
| 546412 | M | Oromia Re Lower Thai     | 0 | 60  | N | Fail        |
| 546431 | M | South Wes Lower Thai     | 0 | 120 | N | Fail        |
| 546439 | F | South Regi Lower Thai    | 0 | 60  | N | Withdrawn   |
| 546464 | M | Addis Abak Lower Thai    | 0 | 60  | N | Distinction |
| 546563 | M | South Wes Lower Thai     | 0 | 60  | N | Withdrawn   |
| 546583 | M | Somalia Re HE Qualific   | 0 | 60  | N | Pass        |
| 546682 | M | South Regi HE Qualific   | 0 | 60  | N | Pass        |
| 546780 | M | Tigrai Regi Lower Thai   | 0 | 60  | N | Fail        |
| 546863 | M | Sidamo Re Lower Thai     | 0 | 60  | N | Withdrawn   |
| 546868 | M | Addis Abak Lower Thai    | 0 | 60  | N | Fail        |
| 546912 | M | Somalia Re A Level or I  | 0 | 60  | N | Pass        |
| 546925 | M | Afar Regio HE Qualific   | 0 | 60  | N | Pass        |
| 546932 | F | South Wes A Level or I   | 0 | 60  | N | Pass        |
| 547014 | M | South Regi Lower Thai    | 0 | 60  | N | Pass        |
| 547128 | M | Tigrai Regi A Level or I | 0 | 120 | Y | Withdrawn   |
| 547228 | F | South Wes HE Qualific    | 0 | 60  | N | Pass        |
| 547267 | M | Amhara Re Lower Thai     | 0 | 120 | N | Withdrawn   |
| 547302 | M | Tigrai Regi Lower Thai   | 0 | 60  | N | Fail        |
| 547399 | M | South Wes Lower Thai     | 0 | 60  | N | Pass        |
| 547400 | F | South Wes Lower Thai     | 0 | 60  | Y | Distinction |
| 547534 | F | South Regi A Level or I  | 0 | 60  | N | Fail        |
| 547581 | M | Sidamo Re A Level or I   | 0 | 60  | N | Distinction |
| 547609 | M | Sidamo Re No Formal      | 0 | 120 | N | Withdrawn   |
| 547666 | M | Sidamo Re HE Qualific    | 0 | 90  | N | Withdrawn   |
| 547667 | M | Somalia Re A Level or I  | 0 | 60  | N | Withdrawn   |
| 547876 | M | South Regi A Level or I  | 0 | 60  | N | Withdrawn   |
| 547884 | M | Oromia Re Lower Thai     | 0 | 60  | N | Withdrawn   |
| 547953 | M | South Wes A Level or I   | 0 | 60  | N | Fail        |
| 548043 | M | South Regi Lower Thai    | 0 | 60  | Y | Withdrawn   |
| 548057 | F | North Regi A Level or I  | 0 | 60  | N | Fail        |
| 548087 | F | South Regi A Level or I  | 0 | 60  | N | Pass        |
| 548095 | M | Tigrai Regi A Level or I | 0 | 120 | N | Distinction |
| 548099 | F | Addis Abak A Level or I  | 0 | 60  | N | Pass        |
| 548180 | M | Tigrai Regi Lower Thai   | 0 | 60  | N | Fail        |
| 548219 | F | Addis Abak A Level or I  | 0 | 60  | Y | Pass        |
| 548312 | M | Oromia Re A Level or I   | 0 | 60  | N | Distinction |
| 548331 | F | Somalia Re HE Qualific   | 0 | 150 | N | Withdrawn   |
| 548352 | M | Addis Abak A Level or I  | 0 | 60  | N | Pass        |
| 548415 | M | Somalia Re A Level or I  | 0 | 60  | Y | Withdrawn   |
| 548459 | F | South Wes Lower Thai     | 0 | 60  | N | Pass        |
| 548521 | F | Somalia Re Lower Thai    | 0 | 60  | N | Pass        |
| 548547 | F | Afar Regio A Level or I  | 0 | 60  | N | Withdrawn   |
| 548573 | M | Amhara Re Lower Thai     | 0 | 60  | N | Withdrawn   |
| 548608 | M | North Regi A Level or I  | 0 | 60  | Y | Withdrawn   |
| 548741 | M | Sidamo Re A Level or I   | 0 | 60  | N | Fail        |
| 548759 | M | South Regi Lower Thai    | 0 | 60  | N | Pass        |

|        |   |                         |   |     |   |             |
|--------|---|-------------------------|---|-----|---|-------------|
| 548764 | M | Addis Abat A Level or I | 0 | 60  | N | Pass        |
| 548819 | F | Sidamo Re Lower Tha     | 0 | 60  | N | Withdrawn   |
| 548857 | M | North Regi Lower Tha    | 0 | 90  | N | Pass        |
| 548893 | M | Addis Abak Lower Tha    | 0 | 60  | Y | Withdrawn   |
| 548926 | F | Addis Abat A Level or I | 0 | 120 | N | Fail        |
| 548938 | M | South Regi A Level or I | 0 | 60  | N | Fail        |
| 548948 | M | North Regi A Level or I | 0 | 120 | N | Withdrawn   |
| 548969 | M | Addis Abat A Level or I | 0 | 90  | Y | Withdrawn   |
| 549014 | M | Tigrai Regi Lower Tha   | 0 | 90  | Y | Fail        |
| 549056 | M | South Regi A Level or I | 0 | 60  | N | Fail        |
| 549065 | M | Afar Regio HE Qualific  | 0 | 120 | N | Pass        |
| 549093 | F | Afar Regio Lower Tha    | 0 | 60  | N | Fail        |
| 549149 | M | South Regi Lower Tha    | 0 | 60  | N | Fail        |
| 549239 | M | South Regi A Level or I | 0 | 60  | N | Pass        |
| 549311 | M | Addis Abat A Level or I | 0 | 90  | N | Withdrawn   |
| 549343 | M | South Regi A Level or I | 0 | 60  | N | Pass        |
| 549369 | M | South Regi A Level or I | 0 | 60  | N | Pass        |
| 549370 | M | Oromia Re Lower Tha     | 0 | 60  | N | Fail        |
| 549410 | M | Amhara Re A Level or I  | 0 | 60  | N | Fail        |
| 549420 | M | Oromia Re A Level or I  | 0 | 60  | N | Distinction |
| 549504 | M | South Regi Lower Tha    | 0 | 60  | N | Withdrawn   |
| 549505 | M | South Regi Lower Tha    | 0 | 60  | Y | Withdrawn   |
| 549513 | M | Tigrai Regi Lower Tha   | 0 | 60  | N | Withdrawn   |
| 549517 | M | Tigrai Regi HE Qualific | 0 | 60  | N | Pass        |
| 549537 | M | Sidamo Re A Level or I  | 0 | 120 | N | Pass        |
| 549596 | M | Somalia Re A Level or I | 0 | 60  | N | Fail        |
| 549626 | F | South Regi Lower Tha    | 0 | 60  | N | Pass        |
| 549670 | M | North Regi A Level or I | 0 | 60  | N | Fail        |
| 549706 | F | South Regi HE Qualific  | 0 | 60  | N | Pass        |
| 549751 | M | Afar Regio HE Qualific  | 0 | 60  | N | Fail        |
| 549790 | M | Addis Abat A Level or I | 0 | 60  | N | Pass        |
| 549792 | M | Addis Abat HE Qualific  | 0 | 90  | N | Withdrawn   |
| 549825 | M | Somalia Re A Level or I | 0 | 60  | N | Pass        |
| 549898 | M | North Regi Lower Tha    | 0 | 60  | N | Pass        |
| 549904 | F | South Regi Lower Tha    | 0 | 120 | N | Fail        |
| 550024 | M | Sidamo Re Lower Tha     | 0 | 60  | N | Withdrawn   |
| 550026 | F | North Regi A Level or I | 0 | 60  | N | Pass        |
| 550095 | M | Oromia Re Lower Tha     | 0 | 60  | N | Fail        |
| 550123 | M | South Regi Lower Tha    | 0 | 60  | N | Pass        |
| 550246 | M | Oromia Re Lower Tha     | 0 | 120 | N | Withdrawn   |
| 550272 | M | South Regi A Level or I | 0 | 60  | N | Pass        |
| 550287 | M | Afar Regio A Level or I | 0 | 60  | N | Pass        |
| 550377 | M | South Wes Lower Tha     | 0 | 60  | N | Withdrawn   |
| 550435 | M | Addis Abat A Level or I | 0 | 120 | N | Fail        |
| 550470 | M | South Regi A Level or I | 0 | 60  | N | Distinction |
| 550495 | M | South Regi Lower Tha    | 0 | 60  | N | Distinction |
| 550610 | M | Tigrai Regi Lower Tha   | 0 | 60  | N | Withdrawn   |

|        |   |                          |   |     |   |             |
|--------|---|--------------------------|---|-----|---|-------------|
| 550617 | M | South Wes A Level or I   | 0 | 120 | Y | Fail        |
| 550651 | M | Sidamo Re Lower Tha      | 0 | 60  | N | Pass        |
| 550736 | M | South Regi A Level or I  | 0 | 60  | N | Pass        |
| 550763 | M | Addis Abak A Level or I  | 0 | 60  | N | Distinction |
| 550787 | F | South Wes A Level or I   | 0 | 60  | N | Fail        |
| 550792 | F | Afar Regio Lower Tha     | 0 | 120 | N | Fail        |
| 550797 | F | Amhara Re A Level or I   | 0 | 60  | N | Pass        |
| 550802 | M | North Regi Lower Tha     | 0 | 60  | N | Pass        |
| 550813 | M | North Regi A Level or I  | 0 | 90  | N | Pass        |
| 550853 | M | South Regi Lower Tha     | 0 | 60  | Y | Pass        |
| 550866 | M | Tigrai Regi A Level or I | 0 | 120 | N | Fail        |
| 550909 | M | Addis Abak Lower Tha     | 0 | 90  | N | Fail        |
| 550933 | M | Amhara Re A Level or I   | 0 | 60  | N | Pass        |
| 550961 | M | Sidamo Re A Level or I   | 0 | 90  | N | Fail        |
| 551027 | M | Sidamo Re Lower Tha      | 0 | 60  | N | Pass        |
| 551052 | M | South Wes A Level or I   | 0 | 90  | N | Withdrawn   |
| 551058 | M | Oromia Re HE Qualific    | 0 | 90  | N | Pass        |
| 551061 | M | Afar Regio A Level or I  | 0 | 60  | N | Fail        |
| 551134 | F | Sidamo Re Lower Tha      | 0 | 60  | N | Withdrawn   |
| 551137 | M | Sidamo Re Lower Tha      | 0 | 60  | N | Withdrawn   |
| 551142 | M | South Regi Lower Tha     | 0 | 60  | Y | Withdrawn   |
| 551156 | M | Sidamo Re Lower Tha      | 0 | 90  | N | Withdrawn   |
| 551190 | M | Sidamo Re A Level or I   | 0 | 60  | N | Fail        |
| 551212 | M | South Wes A Level or I   | 0 | 60  | N | Distinction |
| 551258 | M | Amhara Re A Level or I   | 0 | 60  | N | Pass        |
| 551287 | M | North Regi A Level or I  | 0 | 60  | N | Fail        |
| 551311 | M | South Regi Lower Tha     | 0 | 60  | N | Pass        |
| 551397 | M | South Wes A Level or I   | 0 | 60  | N | Pass        |
| 551482 | M | Somalia Re HE Qualific   | 0 | 60  | N | Fail        |
| 551492 | M | Amhara Re Lower Tha      | 0 | 90  | N | Withdrawn   |
| 551495 | M | South Wes Lower Tha      | 0 | 60  | N | Fail        |
| 551528 | M | Sidamo Re Lower Tha      | 0 | 60  | N | Withdrawn   |
| 551583 | M | Amhara Re HE Qualific    | 0 | 60  | N | Pass        |
| 551602 | M | Amhara Re Lower Tha      | 0 | 120 | N | Pass        |
| 551688 | M | Addis Abak Lower Tha     | 0 | 60  | N | Fail        |
| 551730 | M | Tigrai Regi A Level or I | 0 | 60  | N | Fail        |
| 551764 | M | South Regi Lower Tha     | 0 | 120 | N | Withdrawn   |
| 551791 | M | South Regi A Level or I  | 0 | 60  | N | Pass        |
| 551796 | F | Tigrai Regi A Level or I | 0 | 60  | N | Pass        |
| 551805 | M | Amhara Re Lower Tha      | 0 | 120 | N | Pass        |
| 552041 | M | Addis Abak No Formal     | 0 | 90  | N | Withdrawn   |
| 552057 | M | Addis Abak A Level or I  | 0 | 60  | N | Fail        |
| 552142 | M | South Regi A Level or I  | 0 | 120 | N | Pass        |
| 552228 | M | Sidamo Re Lower Tha      | 0 | 120 | N | Fail        |
| 552284 | M | Addis Abak A Level or I  | 0 | 60  | N | Withdrawn   |
| 552320 | M | Afar Regio A Level or I  | 0 | 60  | N | Pass        |
| 552374 | M | South Wes Lower Tha      | 0 | 60  | Y | Pass        |

|        |   |                          |   |     |   |             |
|--------|---|--------------------------|---|-----|---|-------------|
| 552395 | M | Sidamo Re A Level or I   | 0 | 60  | Y | Withdrawn   |
| 552450 | M | Sidamo Re Lower Than     | 0 | 120 | N | Fail        |
| 552491 | F | Sidamo Re Lower Than     | 0 | 60  | N | Pass        |
| 552560 | M | South Regi HE Qualific   | 0 | 120 | N | Fail        |
| 552567 | M | Sidamo Re A Level or I   | 0 | 120 | N | Fail        |
| 552580 | M | South Regi Lower Than    | 0 | 60  | N | Withdrawn   |
| 552614 | M | Oromia Re A Level or I   | 0 | 60  | N | Withdrawn   |
| 552648 | M | Amhara Re Lower Than     | 0 | 90  | N | Fail        |
| 552708 | M | Sidamo Re A Level or I   | 0 | 90  | N | Distinction |
| 552721 | M | South Wes Lower Than     | 0 | 60  | N | Pass        |
| 552740 | F | Sidamo Re A Level or I   | 0 | 90  | N | Withdrawn   |
| 552834 | M | Amhara Re Lower Than     | 0 | 60  | N | Fail        |
| 552987 | M | Oromia Re HE Qualific    | 0 | 60  | N | Pass        |
| 553017 | M | Sidamo Re Lower Than     | 0 | 60  | N | Fail        |
| 553100 | M | Somalia Re Lower Than    | 0 | 60  | N | Pass        |
| 553104 | M | Tigrai Regi Lower Than   | 0 | 120 | N | Pass        |
| 553131 | M | Sidamo Re Lower Than     | 0 | 60  | N | Fail        |
| 553155 | M | South Wes HE Qualific    | 0 | 90  | N | Distinction |
| 553220 | M | South Regi A Level or I  | 0 | 60  | N | Distinction |
| 553240 | F | Amhara Re A Level or I   | 0 | 60  | N | Withdrawn   |
| 553262 | M | Amhara Re A Level or I   | 0 | 60  | N | Pass        |
| 553325 | M | Tigrai Regi Lower Than   | 0 | 60  | N | Fail        |
| 553404 | M | Addis Abak Lower Than    | 0 | 120 | N | Withdrawn   |
| 553425 | M | Addis Abak A Level or I  | 0 | 60  | N | Pass        |
| 553500 | M | South Regi A Level or I  | 0 | 60  | N | Pass        |
| 553528 | F | Sidamo Re Lower Than     | 0 | 60  | N | Fail        |
| 553631 | M | South Regi A Level or I  | 0 | 90  | N | Withdrawn   |
| 553649 | M | North Regi A Level or I  | 0 | 60  | N | Pass        |
| 553655 | F | Somalia Re A Level or I  | 0 | 60  | N | Pass        |
| 553727 | M | Somalia Re Lower Than    | 0 | 90  | N | Fail        |
| 553781 | F | South Wes A Level or I   | 0 | 60  | N | Pass        |
| 553813 | M | South Regi Lower Than    | 0 | 60  | N | Fail        |
| 553831 | F | Oromia Re Lower Than     | 0 | 120 | N | Pass        |
| 553834 | F | Somalia Re Lower Than    | 0 | 60  | Y | Withdrawn   |
| 553841 | M | Afar Regioi A Level or I | 0 | 60  | N | Fail        |
| 553878 | M | Amhara Re Lower Than     | 0 | 60  | N | Pass        |
| 553963 | M | North Regi Lower Than    | 0 | 120 | N | Fail        |
| 554038 | M | South Wes A Level or I   | 0 | 120 | N | Fail        |
| 554044 | M | Addis Abak A Level or I  | 0 | 60  | N | Pass        |
| 554045 | M | Sidamo Re A Level or I   | 0 | 60  | N | Withdrawn   |
| 554152 | M | Sidamo Re A Level or I   | 0 | 60  | Y | Withdrawn   |
| 554166 | M | Sidamo Re A Level or I   | 0 | 120 | N | Fail        |
| 554236 | M | Afar Regioi HE Qualific  | 0 | 60  | N | Pass        |
| 554256 | M | Addis Abak A Level or I  | 0 | 60  | N | Fail        |
| 554289 | M | South Regi HE Qualific   | 0 | 60  | N | Pass        |
| 554331 | M | South Regi Lower Than    | 0 | 60  | N | Pass        |
| 554365 | M | Amhara Re Lower Than     | 0 | 120 | N | Withdrawn   |

|        |   |                          |   |     |   |             |
|--------|---|--------------------------|---|-----|---|-------------|
| 554372 | M | South Wes Lower Tha      | 0 | 60  | N | Pass        |
| 554435 | F | Sidamo Re A Level or I   | 0 | 90  | N | Fail        |
| 554476 | M | Sidamo Re A Level or I   | 0 | 60  | N | Pass        |
| 554558 | M | Sidamo Re Lower Tha      | 0 | 60  | N | Distinction |
| 554592 | M | South Wes A Level or I   | 0 | 60  | N | Pass        |
| 554620 | M | Sidamo Re A Level or I   | 0 | 70  | Y | Pass        |
| 554664 | M | North Regi Lower Tha     | 0 | 120 | N | Pass        |
| 554748 | M | South Wes Lower Tha      | 0 | 60  | Y | Pass        |
| 554761 | M | Afar Regio A Level or I  | 0 | 60  | N | Pass        |
| 554813 | M | South Regi A Level or I  | 0 | 60  | N | Pass        |
| 554852 | M | Sidamo Re A Level or I   | 0 | 90  | N | Pass        |
| 554888 | F | South Wes HE Qualific    | 0 | 60  | N | Withdrawn   |
| 554908 | M | Amhara Re A Level or I   | 0 | 60  | N | Distinction |
| 554919 | M | Tigrai Regi A Level or I | 0 | 60  | Y | Withdrawn   |
| 554923 | M | Oromia Re A Level or I   | 0 | 60  | N | Fail        |
| 554940 | M | Amhara Re A Level or I   | 0 | 60  | N | Fail        |
| 554946 | M | Amhara Re A Level or I   | 0 | 60  | N | Fail        |
| 555110 | M | Amhara Re Lower Tha      | 0 | 120 | N | Withdrawn   |
| 555144 | M | South Wes Lower Tha      | 0 | 120 | N | Pass        |
| 555148 | M | South Regi Lower Tha     | 0 | 60  | N | Withdrawn   |
| 555168 | M | Sidamo Re A Level or I   | 0 | 60  | N | Withdrawn   |
| 555178 | M | South Regi Lower Tha     | 0 | 60  | N | Withdrawn   |
| 555250 | M | South Regi Lower Tha     | 0 | 150 | N | Pass        |
| 555349 | M | Somalia Re Lower Tha     | 0 | 60  | N | Fail        |
| 555444 | M | Amhara Re HE Qualific    | 0 | 60  | N | Pass        |
| 555503 | M | Afar Regio HE Qualific   | 0 | 60  | N | Pass        |
| 555539 | M | Sidamo Re A Level or I   | 0 | 90  | N | Withdrawn   |
| 555609 | M | Sidamo Re Lower Tha      | 0 | 60  | N | Withdrawn   |
| 555619 | M | Amhara Re HE Qualific    | 0 | 60  | N | Fail        |
| 555653 | M | Amhara Re Lower Tha      | 0 | 180 | N | Withdrawn   |
| 555709 | M | Sidamo Re No Formal      | 0 | 60  | N | Withdrawn   |
| 555786 | M | Tigrai Regi A Level or I | 0 | 90  | N | Withdrawn   |
| 556004 | M | Addis Abak A Level or I  | 0 | 120 | N | Fail        |
| 556022 | M | South Wes A Level or I   | 0 | 60  | N | Pass        |
| 556121 | M | Addis Abak Lower Tha     | 0 | 60  | N | Fail        |
| 556126 | M | Sidamo Re A Level or I   | 0 | 60  | Y | Withdrawn   |
| 556133 | M | South Regi A Level or I  | 0 | 60  | N | Pass        |
| 556134 | M | Amhara Re Lower Tha      | 0 | 120 | N | Withdrawn   |
| 556153 | M | Oromia Re A Level or I   | 0 | 60  | N | Withdrawn   |
| 556203 | F | Sidamo Re Lower Tha      | 0 | 60  | N | Withdrawn   |
| 556210 | M | Sidamo Re Lower Tha      | 0 | 60  | N | Pass        |
| 556251 | M | Amhara Re A Level or I   | 0 | 60  | N | Pass        |
| 556302 | M | Sidamo Re Lower Tha      | 0 | 60  | N | Pass        |
| 556351 | F | South Regi Lower Tha     | 0 | 60  | Y | Fail        |
| 556391 | M | Somalia Re Lower Tha     | 0 | 60  | Y | Pass        |
| 556404 | M | South Regi A Level or I  | 0 | 60  | N | Withdrawn   |
| 556408 | M | South Wes A Level or I   | 0 | 60  | N | Withdrawn   |

|        |   |                          |   |     |   |             |
|--------|---|--------------------------|---|-----|---|-------------|
| 556429 | M | South Regi Lower Tha     | 0 | 60  | N | Pass        |
| 556440 | M | Afar Regio HE Qualific   | 0 | 60  | Y | Pass        |
| 556489 | M | Sidamo Re Lower Tha      | 0 | 60  | N | Withdrawn   |
| 556492 | M | South Regi A Level or I  | 0 | 90  | N | Withdrawn   |
| 556498 | M | Amhara Re Lower Tha      | 0 | 60  | N | Pass        |
| 556540 | M | South Regi Lower Tha     | 0 | 60  | N | Pass        |
| 556542 | M | North Regi A Level or I  | 0 | 60  | Y | Withdrawn   |
| 556567 | F | Addis Abak A Level or I  | 0 | 60  | N | Pass        |
| 556659 | M | Addis Abak Lower Tha     | 0 | 60  | N | Pass        |
| 556783 | F | Addis Abak HE Qualific   | 0 | 60  | N | Distinction |
| 556880 | M | Oromia Re Lower Tha      | 0 | 60  | N | Fail        |
| 556911 | M | Sidamo Re A Level or I   | 0 | 120 | Y | Withdrawn   |
| 556924 | F | Sidamo Re A Level or I   | 0 | 60  | N | Pass        |
| 556927 | M | Somalia Re A Level or I  | 0 | 60  | N | Withdrawn   |
| 556931 | M | Sidamo Re A Level or I   | 0 | 60  | N | Fail        |
| 556945 | F | Addis Abak HE Qualific   | 0 | 60  | N | Pass        |
| 556970 | M | South Wes Lower Tha      | 0 | 60  | N | Fail        |
| 557053 | M | North Regi Lower Tha     | 0 | 60  | N | Pass        |
| 557089 | F | Addis Abak A Level or I  | 0 | 60  | N | Withdrawn   |
| 557129 | M | Sidamo Re A Level or I   | 0 | 60  | N | Fail        |
| 557177 | M | South Regi Lower Tha     | 0 | 60  | N | Pass        |
| 557203 | M | Sidamo Re A Level or I   | 0 | 60  | N | Fail        |
| 557314 | M | Sidamo Re A Level or I   | 0 | 120 | N | Pass        |
| 557345 | M | Addis Abak A Level or I  | 0 | 60  | N | Distinction |
| 557388 | M | South Regi Lower Tha     | 0 | 60  | N | Pass        |
| 557445 | F | North Regi A Level or I  | 0 | 60  | N | Pass        |
| 557469 | M | South Wes A Level or I   | 0 | 120 | N | Withdrawn   |
| 557542 | M | South Regi A Level or I  | 0 | 60  | N | Withdrawn   |
| 557586 | M | South Wes HE Qualific    | 0 | 60  | N | Fail        |
| 557588 | M | Sidamo Re A Level or I   | 0 | 90  | N | Withdrawn   |
| 557710 | F | Afar Regio HE Qualific   | 0 | 60  | Y | Distinction |
| 557735 | M | South Wes Lower Tha      | 0 | 120 | N | Withdrawn   |
| 557773 | M | South Regi A Level or I  | 0 | 60  | N | Withdrawn   |
| 557787 | M | Sidamo Re A Level or I   | 0 | 120 | N | Pass        |
| 557792 | M | South Regi Lower Tha     | 0 | 60  | N | Fail        |
| 557811 | M | Somalia Re A Level or I  | 0 | 90  | N | Pass        |
| 557840 | M | South Regi Lower Tha     | 0 | 60  | N | Distinction |
| 557877 | M | Tigrai Regi A Level or I | 0 | 60  | N | Pass        |
| 557891 | M | Sidamo Re A Level or I   | 0 | 60  | N | Pass        |
| 557908 | F | South Regi A Level or I  | 0 | 60  | Y | Withdrawn   |
| 558018 | M | North Regi A Level or I  | 0 | 60  | N | Distinction |
| 558098 | M | South Regi A Level or I  | 0 | 60  | Y | Pass        |
| 558104 | F | Addis Abak A Level or I  | 0 | 60  | N | Pass        |
| 558199 | M | Oromia Re Lower Tha      | 0 | 90  | N | Withdrawn   |
| 558208 | M | Afar Regio HE Qualific   | 0 | 60  | N | Pass        |
| 558244 | M | Tigrai Regi HE Qualific  | 0 | 60  | N | Withdrawn   |
| 558262 | M | South Regi A Level or I  | 0 | 150 | N | Fail        |

|        |   |                         |   |     |   |             |
|--------|---|-------------------------|---|-----|---|-------------|
| 558280 | M | Somalia Re A Level or I | 0 | 90  | N | Pass        |
| 558354 | M | Sidamo Re A Level or I  | 0 | 120 | Y | Withdrawn   |
| 558404 | M | Sidamo Re Lower Than    | 0 | 120 | N | Withdrawn   |
| 558489 | M | South Regi Lower Than   | 0 | 60  | N | Pass        |
| 558503 | M | South Regi Lower Than   | 0 | 60  | N | Pass        |
| 558558 | M | Oromia Re HE Qualific   | 0 | 60  | N | Distinction |
| 558597 | M | North Regi A Level or I | 0 | 60  | N | Distinction |
| 558628 | M | South Regi Lower Than   | 0 | 60  | N | Pass        |
| 558692 | M | South Regi Lower Than   | 0 | 60  | N | Fail        |
| 558760 | M | Oromia Re A Level or I  | 0 | 90  | N | Pass        |
| 558770 | F | Amhara Re Lower Than    | 0 | 60  | N | Pass        |
| 558772 | F | Amhara Re A Level or I  | 0 | 60  | N | Pass        |
| 558776 | M | South Wes Lower Than    | 0 | 60  | N | Withdrawn   |
| 558801 | M | Tigrai Regi Lower Than  | 0 | 60  | N | Pass        |
| 558807 | M | Addis Abak A Level or I | 0 | 60  | N | Withdrawn   |
| 558851 | M | Sidamo Re Lower Than    | 0 | 60  | N | Pass        |
| 558854 | M | South Regi Lower Than   | 0 | 60  | N | Fail        |
| 558907 | F | South Regi A Level or I | 0 | 60  | N | Pass        |
| 558915 | M | South Wes A Level or I  | 0 | 120 | Y | Pass        |
| 558957 | M | North Regi Lower Than   | 0 | 60  | N | Withdrawn   |
| 558963 | M | Sidamo Re Lower Than    | 0 | 60  | N | Pass        |
| 559004 | M | South Wes A Level or I  | 0 | 60  | N | Distinction |
| 559019 | M | Addis Abak Lower Than   | 0 | 120 | N | Withdrawn   |
| 559058 | M | Oromia Re Lower Than    | 0 | 60  | N | Pass        |
| 559062 | M | Somalia Re Lower Than   | 0 | 60  | N | Fail        |
| 559155 | M | Amhara Re HE Qualific   | 0 | 60  | N | Pass        |
| 559325 | M | North Regi Lower Than   | 0 | 60  | N | Distinction |
| 559335 | M | South Wes HE Qualific   | 0 | 60  | N | Pass        |
| 559397 | M | Sidamo Re Lower Than    | 0 | 60  | N | Fail        |
| 559405 | M | North Regi Lower Than   | 0 | 60  | N | Fail        |
| 559423 | M | Addis Abak A Level or I | 0 | 60  | N | Distinction |
| 559440 | M | South Wes HE Qualific   | 0 | 60  | N | Pass        |
| 559449 | M | North Regi Post Gradu   | 0 | 60  | N | Withdrawn   |
| 559451 | F | South Wes A Level or I  | 0 | 60  | N | Fail        |
| 559454 | M | Sidamo Re Lower Than    | 0 | 60  | N | Pass        |
| 559496 | M | North Regi Lower Than   | 0 | 60  | N | Withdrawn   |
| 559589 | M | South Wes A Level or I  | 0 | 60  | N | Pass        |
| 559594 | M | Sidamo Re Lower Than    | 0 | 60  | N | Pass        |
| 559609 | M | South Regi A Level or I | 0 | 60  | N | Pass        |
| 559642 | M | Somalia Re HE Qualific  | 0 | 60  | N | Pass        |
| 559656 | M | Oromia Re Lower Than    | 0 | 90  | N | Withdrawn   |
| 559688 | M | Sidamo Re A Level or I  | 0 | 60  | N | Fail        |
| 559760 | M | Sidamo Re Lower Than    | 0 | 60  | N | Pass        |
| 559768 | M | South Regi Lower Than   | 0 | 60  | N | Fail        |
| 559770 | M | Oromia Re HE Qualific   | 0 | 60  | N | Pass        |
| 559785 | M | South Regi Lower Than   | 0 | 60  | N | Distinction |
| 559856 | M | North Regi Lower Than   | 0 | 60  | N | Pass        |



|         |   |                          |   |     |   |             |
|---------|---|--------------------------|---|-----|---|-------------|
| 559991  | M | Addis Abat Lower Tha     | 0 | 60  | Y | Fail        |
| 560010  | M | South Regi A Level or l  | 0 | 60  | N | Fail        |
| 560022  | M | Addis Abat HE Qualific   | 0 | 60  | N | Pass        |
| 560046  | F | North Regi Post Gradu    | 0 | 60  | N | Pass        |
| 560067  | M | Oromia Re A Level or l   | 0 | 90  | N | Fail        |
| 560072  | F | Afar Regio HE Qualific   | 0 | 60  | N | Distinction |
| 560182  | M | South Regi Lower Tha     | 0 | 90  | Y | Pass        |
| 560197  | F | Sidamo Re Lower Tha      | 0 | 60  | N | Withdrawn   |
| 560199  | M | South Regi Lower Tha     | 0 | 120 | N | Pass        |
| 560207  | M | Sidamo Re No Formal      | 0 | 60  | N | Pass        |
| 560404  | M | Amhara Re A Level or l   | 0 | 75  | Y | Fail        |
| 560410  | M | Afar Regio Lower Tha     | 0 | 60  | N | Withdrawn   |
| 560425  | M | South Regi A Level or l  | 0 | 60  | N | Pass        |
| 560431  | M | South Wes A Level or l   | 0 | 60  | N | Distinction |
| 560443  | M | Somalia Re A Level or l  | 0 | 60  | N | Withdrawn   |
| 560459  | M | Sidamo Re A Level or l   | 0 | 60  | Y | Withdrawn   |
| 560496  | F | Oromia Re A Level or l   | 0 | 90  | N | Withdrawn   |
| 560585  | M | Somalia Re A Level or l  | 0 | 60  | N | Pass        |
| 928248  | M | Sidamo Re HE Qualific    | 0 | 60  | N | Pass        |
| 962951  | M | South Regi A Level or l  | 2 | 150 | N | Withdrawn   |
| 988019  | F | Sidamo Re A Level or l   | 0 | 60  | Y | Withdrawn   |
| 999174  | M | Oromia Re HE Qualific    | 1 | 150 | N | Pass        |
| 1026777 | M | South Regi Lower Tha     | 1 | 210 | N | Withdrawn   |
| 1034674 | M | Oromia Re A Level or l   | 0 | 60  | N | Pass        |
| 1054876 | M | Sidamo Re Lower Tha      | 0 | 60  | N | Fail        |
| 1073767 | F | Somalia Re HE Qualific   | 0 | 60  | N | Pass        |
| 1090738 | M | Tigrai Regi A Level or l | 1 | 150 | N | Fail        |
| 1097354 | M | South Regi HE Qualific   | 0 | 90  | N | Pass        |
| 1118284 | M | South Regi A Level or l  | 0 | 60  | N | Pass        |
| 1337055 | M | South Regi HE Qualific   | 1 | 150 | N | Pass        |
| 1347198 | M | Tigrai Regi A Level or l | 0 | 60  | N | Pass        |
| 1397662 | F | South Regi Lower Tha     | 0 | 60  | N | Fail        |
| 1411562 | F | South Regi Lower Tha     | 0 | 60  | N | Withdrawn   |
| 1436558 | M | South Wes A Level or l   | 0 | 60  | N | Distinction |
| 1440072 | M | Afar Regio HE Qualific   | 0 | 150 | N | Pass        |
| 1442706 | F | Oromia Re HE Qualific    | 0 | 90  | Y | Fail        |
| 1444520 | F | Afar Regio HE Qualific   | 0 | 60  | N | Pass        |
| 1464952 | M | Addis Abat HE Qualific   | 0 | 90  | N | Pass        |
| 1494901 | M | South Regi A Level or l  | 0 | 90  | N | Withdrawn   |
| 1500410 | M | North Regi Lower Tha     | 0 | 60  | N | Pass        |
| 1510285 | M | Addis Abat Lower Tha     | 0 | 60  | N | Pass        |
| 1531287 | M | South Regi A Level or l  | 0 | 60  | N | Pass        |
| 1532840 | M | Addis Abat A Level or l  | 0 | 60  | N | Pass        |
| 1534560 | M | Sidamo Re A Level or l   | 0 | 60  | N | Pass        |
| 1536138 | M | Sidamo Re A Level or l   | 0 | 90  | N | Pass        |
| 1554143 | M | Sidamo Re A Level or l   | 0 | 90  | N | Fail        |
| 1558539 | F | Afar Regio Lower Tha     | 0 | 60  | Y | Withdrawn   |

|         |   |                            |   |     |   |             |
|---------|---|----------------------------|---|-----|---|-------------|
| 1559365 | M | Oromia Re Lower Tha        | 1 | 120 | N | Withdrawn   |
| 1562320 | M | Afar Region HE Qualific    | 0 | 60  | N | Withdrawn   |
| 1614181 | M | Sidamo Re Lower Tha        | 0 | 60  | N | Pass        |
| 1627071 | M | Sidamo Re Lower Tha        | 1 | 120 | Y | Fail        |
| 1651020 | M | Somalia Re A Level or I    | 1 | 120 | N | Withdrawn   |
| 1668504 | M | Addis Abat A Level or I    | 1 | 90  | N | Distinction |
| 1689730 | M | Sidamo Re A Level or I     | 1 | 120 | N | Pass        |
| 1699445 | M | Oromia Re Lower Tha        | 0 | 120 | N | Pass        |
| 1720712 | M | Amhara Re Lower Tha        | 0 | 90  | N | Pass        |
| 1742834 | F | Afar Region Post Gradu     | 0 | 60  | N | Pass        |
| 1761013 | M | Tigray Region A Level or I | 0 | 60  | N | Pass        |
| 1766303 | F | South Regi A Level or I    | 0 | 60  | N | Withdrawn   |
| 1772429 | M | Afar Region A Level or I   | 0 | 60  | N | Pass        |
| 1784775 | F | North Regi HE Qualific     | 0 | 120 | N | Pass        |
| 1788974 | M | South Wes HE Qualific      | 0 | 90  | N | Fail        |
| 1809578 | M | North Regi A Level or I    | 0 | 60  | N | Pass        |
| 1813486 | M | South Regi A Level or I    | 1 | 60  | N | Fail        |
| 1813664 | M | South Regi HE Qualific     | 0 | 60  | N | Withdrawn   |
| 1821249 | M | South Regi Lower Tha       | 0 | 60  | N | Withdrawn   |
| 1824428 | M | South Wes Lower Tha        | 1 | 150 | N | Withdrawn   |
| 1833107 | F | South Wes Lower Tha        | 0 | 90  | N | Fail        |
| 1836988 | M | Afar Region HE Qualific    | 0 | 90  | N | Withdrawn   |
| 1839012 | F | Afar Region Lower Tha      | 1 | 120 | N | Pass        |
| 1839785 | M | Sidamo Re Lower Tha        | 0 | 120 | Y | Withdrawn   |
| 1844150 | M | Sidamo Re A Level or I     | 0 | 60  | N | Pass        |
| 1846751 | M | Tigray Region HE Qualific  | 0 | 90  | N | Pass        |
| 1855249 | F | South Regi HE Qualific     | 2 | 60  | N | Withdrawn   |
| 1861445 | M | Afar Region A Level or I   | 0 | 70  | N | Fail        |
| 1867563 | M | Somalia Re Lower Tha       | 0 | 60  | N | Withdrawn   |
| 1870830 | F | Oromia Re Lower Tha        | 0 | 60  | N | Pass        |
| 1874403 | M | Sidamo Re A Level or I     | 1 | 180 | Y | Withdrawn   |
| 1878918 | M | Afar Region HE Qualific    | 0 | 60  | N | Pass        |
| 1882255 | M | Afar Region Lower Tha      | 0 | 60  | N | Pass        |
| 1896915 | M | South Regi Lower Tha       | 0 | 60  | N | Fail        |
| 1904916 | F | Somalia Re HE Qualific     | 0 | 120 | N | Pass        |
| 1905259 | M | Amhara Re A Level or I     | 0 | 60  | N | Distinction |
| 1907755 | F | Afar Region HE Qualific    | 0 | 90  | N | Distinction |
| 1913435 | M | Addis Abat HE Qualific     | 0 | 60  | N | Pass        |
| 1917796 | M | South Wes A Level or I     | 1 | 120 | N | Pass        |
| 1919940 | M | South Wes A Level or I     | 1 | 120 | N | Distinction |
| 1930949 | M | Sidamo Re Lower Tha        | 0 | 150 | N | Fail        |
| 1934810 | F | Somalia Re A Level or I    | 0 | 90  | N | Fail        |
| 1936679 | F | Oromia Re A Level or I     | 0 | 60  | Y | Pass        |
| 1936935 | M | Sidamo Re Lower Tha        | 0 | 60  | N | Withdrawn   |
| 1966591 | M | Afar Region HE Qualific    | 0 | 60  | N | Distinction |
| 1974271 | M | Oromia Re A Level or I     | 0 | 90  | N | Pass        |
| 1990127 | F | South Regi A Level or I    | 0 | 60  | N | Pass        |

|         |   |                         |   |     |   |             |
|---------|---|-------------------------|---|-----|---|-------------|
| 1997164 | M | South Wes Post Gradu    | 1 | 120 | N | Pass        |
| 2000491 | M | Sidamo Re Lower Thar    | 0 | 90  | N | Pass        |
| 2001665 | M | Addis Abak Lower Thar   | 0 | 60  | N | Pass        |
| 2012900 | M | South Regi Lower Thar   | 0 | 80  | N | Withdrawn   |
| 2031252 | F | Addis Abak A Level or I | 0 | 90  | N | Pass        |
| 2034533 | F | South Regi A Level or I | 0 | 130 | Y | Fail        |
| 2045440 | M | Oromia Re HE Qualific   | 1 | 150 | N | Pass        |
| 2045818 | M | Oromia Re Lower Thar    | 0 | 60  | N | Pass        |
| 2051035 | M | South Regi Lower Thar   | 0 | 60  | N | Pass        |
| 2054019 | M | Afar Regio HE Qualific  | 0 | 90  | N | Pass        |
| 2057105 | M | Oromia Re HE Qualific   | 0 | 60  | N | Pass        |
| 2060467 | M | South Wes HE Qualific   | 0 | 60  | N | Fail        |
| 2068918 | M | Somalia Re A Level or I | 0 | 60  | N | Withdrawn   |
| 2087100 | M | South Wes HE Qualific   | 0 | 60  | N | Distinction |
| 2090053 | M | Addis Abak A Level or I | 0 | 60  | N | Pass        |
| 2102658 | F | South Wes A Level or I  | 0 | 60  | N | Fail        |
| 2108821 | M | Afar Regio HE Qualific  | 2 | 120 | N | Pass        |
| 2139037 | F | Addis Abak HE Qualific  | 0 | 120 | N | Distinction |
| 2140087 | F | South Regi A Level or I | 0 | 90  | N | Pass        |
| 2141085 | F | South Regi Lower Thar   | 0 | 90  | N | Pass        |
| 2142853 | F | Sidamo Re Lower Thar    | 0 | 170 | Y | Fail        |
| 2143065 | M | South Wes A Level or I  | 0 | 100 | N | Pass        |
| 2156733 | M | North Regi Lower Thar   | 0 | 60  | N | Withdrawn   |
| 2158399 | M | Tigrai Regi Lower Thar  | 0 | 60  | Y | Pass        |
| 2182255 | M | South Wes A Level or I  | 0 | 60  | N | Fail        |
| 2189002 | M | Afar Regio HE Qualific  | 0 | 60  | N | Pass        |
| 2195318 | M | Oromia Re Lower Thar    | 0 | 60  | N | Pass        |
| 2195971 | M | Oromia Re Lower Thar    | 0 | 60  | N | Fail        |
| 2197511 | M | South Wes Lower Thar    | 0 | 90  | N | Pass        |
| 2231810 | M | Sidamo Re A Level or I  | 1 | 150 | N | Pass        |
| 2245011 | F | South Regi HE Qualific  | 1 | 120 | N | Withdrawn   |
| 2252905 | F | Afar Regio A Level or I | 1 | 60  | N | Fail        |
| 2254252 | M | South Wes Lower Thar    | 0 | 90  | N | Fail        |
| 2272874 | M | Sidamo Re A Level or I  | 0 | 60  | N | Fail        |
| 2280739 | F | Sidamo Re Lower Thar    | 0 | 60  | N | Fail        |
| 2281483 | M | Afar Regio HE Qualific  | 0 | 70  | N | Pass        |
| 2288454 | M | Somalia Re Lower Thar   | 1 | 120 | N | Pass        |
| 2288493 | M | Sidamo Re Lower Thar    | 0 | 60  | N | Withdrawn   |
| 2327494 | M | Sidamo Re Lower Thar    | 0 | 90  | N | Fail        |
| 2338255 | M | Amhara Re Lower Thar    | 0 | 60  | N | Pass        |
| 2338422 | M | Afar Regio A Level or I | 0 | 60  | N | Pass        |
| 2341415 | F | South Regi HE Qualific  | 1 | 120 | N | Distinction |
| 2343293 | F | Sidamo Re A Level or I  | 0 | 60  | N | Fail        |
| 2346679 | M | South Regi A Level or I | 1 | 180 | N | Pass        |
| 2348120 | F | Oromia Re A Level or I  | 1 | 60  | N | Withdrawn   |
| 2352280 | F | Afar Regio A Level or I | 0 | 60  | N | Pass        |
| 2354732 | M | Sidamo Re Lower Thar    | 0 | 60  | N | Fail        |

|         |   |                          |   |     |   |             |
|---------|---|--------------------------|---|-----|---|-------------|
| 2362169 | M | South Regi Lower Tha     | 0 | 60  | N | Pass        |
| 2364565 | F | Sidamo Re A Level or I   | 1 | 150 | N | Pass        |
| 2367887 | F | Afar Regio A Level or I  | 0 | 120 | N | Withdrawn   |
| 2375526 | M | Sidamo Re Lower Tha      | 0 | 120 | N | Fail        |
| 2381745 | M | Sidamo Re Lower Tha      | 2 | 150 | N | Withdrawn   |
| 2383921 | M | Sidamo Re HE Qualific    | 0 | 60  | N | Pass        |
| 2387054 | F | Sidamo Re Lower Tha      | 0 | 60  | N | Distinction |
| 2389267 | M | South Regi Lower Tha     | 0 | 120 | N | Pass        |
| 2392327 | F | Afar Regio Lower Tha     | 0 | 60  | N | Fail        |
| 2395804 | M | South Wes Lower Tha      | 1 | 120 | N | Pass        |
| 2407762 | M | South Regi HE Qualific   | 0 | 60  | N | Fail        |
| 2413191 | M | Sidamo Re HE Qualific    | 1 | 90  | N | Pass        |
| 2419926 | M | South Regi HE Qualific   | 0 | 80  | N | Pass        |
| 2424750 | M | Sidamo Re Lower Tha      | 0 | 60  | N | Pass        |
| 2434017 | F | South Wes Lower Tha      | 0 | 60  | N | Withdrawn   |
| 2436089 | M | Sidamo Re Lower Tha      | 0 | 60  | N | Fail        |
| 2436873 | F | Sidamo Re No Formal      | 0 | 135 | N | Withdrawn   |
| 2439239 | M | South Wes Post Gradu     | 0 | 60  | N | Pass        |
| 2441910 | M | Addis Abat HE Qualific   | 1 | 120 | N | Fail        |
| 2445410 | F | North Regi Post Gradu    | 0 | 60  | N | Pass        |
| 2446784 | M | North Regi A Level or I  | 0 | 60  | N | Withdrawn   |
| 2457147 | F | Addis Abat A Level or I  | 0 | 60  | N | Pass        |
| 2474925 | M | Tigrai Regi A Level or I | 0 | 60  | N | Fail        |
| 2479413 | M | Oromia Re HE Qualific    | 0 | 90  | N | Pass        |
| 2481646 | M | South Wes HE Qualific    | 0 | 60  | N | Pass        |
| 2488251 | M | Somalia Re Lower Tha     | 0 | 60  | N | Pass        |
| 2496748 | F | Somalia Re A Level or I  | 1 | 120 | N | Pass        |
| 2507271 | M | South Wes Lower Tha      | 0 | 60  | N | Withdrawn   |
| 2508403 | F | Oromia Re Lower Tha      | 0 | 75  | Y | Withdrawn   |
| 2510667 | M | South Regi A Level or I  | 0 | 60  | N | Pass        |
| 2514431 | M | Somalia Re A Level or I  | 0 | 160 | N | Pass        |
| 2514949 | M | Addis Abat Lower Tha     | 1 | 60  | N | Fail        |
| 2521655 | M | Addis Abat A Level or I  | 0 | 60  | Y | Pass        |
| 2522335 | M | Afar Regio A Level or I  | 1 | 60  | N | Distinction |
| 2525062 | M | South Regi Lower Tha     | 0 | 60  | N | Distinction |
| 2532320 | M | South Regi A Level or I  | 0 | 60  | N | Distinction |
| 2532323 | M | Addis Abat A Level or I  | 1 | 150 | N | Pass        |
| 2532652 | M | South Wes A Level or I   | 0 | 60  | N | Withdrawn   |
| 2532840 | M | South Wes A Level or I   | 1 | 120 | N | Withdrawn   |
| 2533504 | M | Oromia Re HE Qualific    | 1 | 120 | N | Distinction |
| 2546095 | M | North Regi A Level or I  | 2 | 150 | N | Pass        |
| 2552831 | M | Afar Regio HE Qualific   | 1 | 180 | N | Fail        |
| 2553363 | M | Sidamo Re HE Qualific    | 0 | 60  | N | Pass        |
| 2560595 | M | Addis Abat Lower Tha     | 0 | 60  | N | Distinction |
| 2567054 | M | Addis Abat A Level or I  | 0 | 60  | N | Distinction |
| 2567288 | M | North Regi Lower Tha     | 0 | 90  | N | Fail        |
| 2567561 | M | Somalia Re HE Qualific   | 0 | 60  | N | Pass        |

|         |   |                          |   |     |   |             |
|---------|---|--------------------------|---|-----|---|-------------|
| 2568893 | M | Sidamo Re A Level or I   | 0 | 120 | N | Withdrawn   |
| 2578992 | M | North Regi A Level or I  | 1 | 150 | Y | Pass        |
| 2578996 | M | Sidamo Re HE Qualific    | 0 | 60  | N | Pass        |
| 2581800 | M | Afar Regio HE Qualific   | 0 | 60  | Y | Withdrawn   |
| 2586748 | M | South Wes Lower Thar     | 0 | 120 | Y | Withdrawn   |
| 2590999 | M | South Regi A Level or I  | 0 | 90  | N | Distinction |
| 2599162 | M | Sidamo Re A Level or I   | 0 | 60  | N | Fail        |
| 2600887 | M | South Wes A Level or I   | 0 | 90  | N | Pass        |
| 2604212 | M | South Regi Lower Thar    | 0 | 60  | N | Fail        |
| 2610837 | M | Sidamo Re HE Qualific    | 1 | 120 | N | Withdrawn   |
| 2613930 | M | South Wes Lower Thar     | 0 | 75  | Y | Distinction |
| 2617541 | M | South Regi A Level or I  | 0 | 60  | N | Pass        |
| 2623196 | M | Sidamo Re A Level or I   | 0 | 60  | N | Pass        |
| 2623427 | M | Afar Regio Lower Thar    | 0 | 75  | N | Pass        |
| 2628246 | F | South Regi A Level or I  | 0 | 60  | N | Withdrawn   |
| 2639410 | M | Addis Abak Lower Thar    | 0 | 60  | N | Withdrawn   |
| 2642994 | M | South Regi A Level or I  | 1 | 180 | N | Withdrawn   |
| 2643574 | M | Sidamo Re HE Qualific    | 1 | 90  | N | Pass        |
| 2644664 | M | Sidamo Re HE Qualific    | 0 | 60  | N | Withdrawn   |
| 2646317 | M | South Wes Lower Thar     | 1 | 120 | N | Pass        |
| 2647043 | F | Sidamo Re HE Qualific    | 0 | 60  | N | Fail        |
| 2650929 | M | Oromia Re Lower Thar     | 0 | 90  | N | Withdrawn   |
| 2654409 | F | South Wes HE Qualific    | 0 | 120 | N | Pass        |
| 2657781 | M | Sidamo Re A Level or I   | 1 | 150 | N | Pass        |
| 2658271 | M | Sidamo Re A Level or I   | 0 | 120 | N | Withdrawn   |
| 2672734 | F | Sidamo Re Lower Thar     | 0 | 60  | N | Withdrawn   |
| 2676920 | M | South Regi Lower Thar    | 0 | 60  | N | Pass        |
| 2678429 | M | Amhara Re A Level or I   | 1 | 60  | Y | Pass        |
| 2684993 | M | Sidamo Re Lower Thar     | 0 | 90  | N | Pass        |
| 2685154 | M | South Wes A Level or I   | 0 | 60  | N | Withdrawn   |
| 2686074 | M | Amhara Re A Level or I   | 0 | 60  | N | Pass        |
| 2686866 | M | Sidamo Re A Level or I   | 0 | 60  | N | Fail        |
| 2686875 | F | Somalia Re A Level or I  | 0 | 60  | N | Pass        |
| 2687045 | M | South Wes Lower Thar     | 0 | 60  | N | Withdrawn   |
| 2688202 | F | Somalia Re Lower Thar    | 1 | 90  | N | Withdrawn   |
| 2691740 | M | Addis Abak Lower Thar    | 0 | 60  | N | Fail        |
| 26247   | M | Oromia Re HE Qualific    | 2 | 60  | N | Fail        |
| 29335   | M | South Regi Lower Thar    | 0 | 60  | N | Distinction |
| 29769   | M | Somalia Re A Level or I  | 1 | 60  | N | Fail        |
| 32221   | M | South Regi A Level or I  | 0 | 60  | N | Fail        |
| 33600   | F | Sidamo Re A Level or I   | 0 | 150 | N | Withdrawn   |
| 34731   | M | Addis Abak A Level or I  | 0 | 60  | N | Withdrawn   |
| 39882   | F | Afar Regio A Level or I  | 0 | 120 | N | Withdrawn   |
| 42616   | F | Afar Regio Lower Thar    | 0 | 60  | N | Pass        |
| 43958   | M | Tigrai Regi A Level or I | 0 | 60  | N | Withdrawn   |
| 47924   | M | South Regi Lower Thar    | 0 | 60  | N | Fail        |
| 49670   | M | North Regi A Level or I  | 0 | 60  | N | Withdrawn   |

|        |   |                          |   |     |   |             |
|--------|---|--------------------------|---|-----|---|-------------|
| 50487  | F | Addis Abat Lower Tha     | 1 | 60  | N | Pass        |
| 51485  | M | South Regi Lower Tha     | 0 | 120 | N | Distinction |
| 51576  | F | Sidamo Re Lower Tha      | 0 | 90  | N | Distinction |
| 53166  | F | North Regi Lower Tha     | 0 | 60  | N | Pass        |
| 53626  | M | Afar Regio HE Qualific   | 0 | 60  | Y | Fail        |
| 54739  | M | Sidamo Re Lower Tha      | 1 | 180 | N | Withdrawn   |
| 54882  | M | Afar Regio Lower Tha     | 1 | 60  | N | Fail        |
| 55013  | M | North Regi A Level or I  | 0 | 120 | N | Fail        |
| 55419  | M | South Regi A Level or I  | 0 | 90  | N | Withdrawn   |
| 57844  | M | South Wes A Level or I   | 0 | 60  | N | Pass        |
| 58077  | M | North Regi Lower Tha     | 1 | 60  | N | Fail        |
| 58640  | M | Afar Regio A Level or I  | 0 | 90  | Y | Pass        |
| 63295  | M | South Regi HE Qualific   | 0 | 150 | N | Pass        |
| 64388  | M | Somalia Re Lower Tha     | 0 | 120 | N | Fail        |
| 66451  | M | Afar Regio A Level or I  | 0 | 60  | N | Pass        |
| 68107  | F | Sidamo Re A Level or I   | 0 | 60  | Y | Pass        |
| 69346  | M | Sidamo Re A Level or I   | 0 | 90  | N | Withdrawn   |
| 70495  | M | Afar Regio Lower Tha     | 0 | 60  | N | Distinction |
| 71252  | M | Amhara Re Lower Tha      | 0 | 60  | Y | Pass        |
| 71897  | M | Oromia Re A Level or I   | 0 | 120 | N | Withdrawn   |
| 72864  | F | Sidamo Re Lower Tha      | 2 | 60  | N | Pass        |
| 77744  | M | Amhara Re A Level or I   | 0 | 60  | N | Pass        |
| 77746  | M | Tigrai Regi A Level or I | 0 | 60  | N | Fail        |
| 79261  | M | South Regi A Level or I  | 0 | 90  | N | Pass        |
| 81536  | M | Afar Regio Lower Tha     | 1 | 60  | N | Fail        |
| 86669  | M | Somalia Re A Level or I  | 1 | 220 | N | Pass        |
| 87042  | F | Amhara Re Lower Tha      | 0 | 120 | N | Withdrawn   |
| 88781  | M | Oromia Re A Level or I   | 1 | 60  | N | Fail        |
| 90901  | M | South Regi HE Qualific   | 0 | 120 | N | Distinction |
| 91629  | M | Tigrai Regi A Level or I | 2 | 60  | Y | Fail        |
| 95746  | M | Addis Abat A Level or I  | 1 | 60  | N | Pass        |
| 100064 | F | South Regi A Level or I  | 0 | 60  | N | Pass        |
| 100788 | M | Afar Regio HE Qualific   | 0 | 90  | N | Pass        |
| 101217 | M | Sidamo Re A Level or I   | 1 | 90  | Y | Withdrawn   |
| 101420 | M | Sidamo Re Lower Tha      | 0 | 120 | N | Pass        |
| 102028 | M | South Regi A Level or I  | 1 | 60  | N | Distinction |
| 102343 | M | Addis Abat A Level or I  | 0 | 60  | N | Pass        |
| 104213 | M | South Wes A Level or I   | 0 | 60  | N | Distinction |
| 105629 | M | Oromia Re A Level or I   | 0 | 60  | N | Pass        |
| 106690 | M | South Regi A Level or I  | 0 | 120 | Y | Withdrawn   |
| 107028 | M | Somalia Re Lower Tha     | 0 | 90  | N | Fail        |
| 107084 | M | Sidamo Re HE Qualific    | 0 | 200 | N | Fail        |
| 110881 | F | Addis Abat A Level or I  | 0 | 60  | N | Pass        |
| 111678 | M | South Wes Lower Tha      | 0 | 60  | N | Fail        |
| 112010 | M | Afar Regio HE Qualific   | 3 | 180 | Y | Withdrawn   |
| 113487 | M | Addis Abat Lower Tha     | 0 | 120 | N | Withdrawn   |
| 113565 | M | Tigrai Regi A Level or I | 0 | 180 | N | Pass        |

|        |   |                          |   |     |   |             |
|--------|---|--------------------------|---|-----|---|-------------|
| 114500 | M | Sidamo Re Lower Tha      | 0 | 120 | Y | Fail        |
| 116290 | M | South Regi A Level or I  | 1 | 120 | N | Fail        |
| 116499 | M | Afar Regio Lower Tha     | 0 | 60  | N | Fail        |
| 116529 | M | South Regi Lower Tha     | 0 | 120 | N | Withdrawn   |
| 116631 | M | South Regi Lower Tha     | 1 | 150 | N | Withdrawn   |
| 116808 | M | Afar Regio HE Qualific   | 0 | 60  | N | Distinction |
| 117232 | M | South Wes A Level or I   | 0 | 90  | N | Pass        |
| 118050 | M | Addis Abak Lower Tha     | 0 | 90  | N | Pass        |
| 118176 | M | North Regi Lower Tha     | 0 | 60  | N | Withdrawn   |
| 124379 | F | Tigrai Regi A Level or I | 1 | 90  | N | Fail        |
| 126074 | M | South Regi Lower Tha     | 0 | 120 | N | Withdrawn   |
| 127642 | F | Sidamo Re A Level or I   | 1 | 120 | N | Pass        |
| 128723 | F | South Regi Lower Tha     | 0 | 120 | N | Withdrawn   |
| 130658 | M | South Wes A Level or I   | 0 | 60  | N | Pass        |
| 132453 | M | Somalia Re A Level or I  | 0 | 60  | N | Pass        |
| 133019 | M | Tigrai Regi Lower Tha    | 0 | 60  | N | Pass        |
| 133185 | M | Addis Abak A Level or I  | 0 | 120 | N | Pass        |
| 133718 | M | Amhara Re Lower Tha      | 0 | 60  | N | Fail        |
| 134847 | M | Afar Regio HE Qualific   | 0 | 120 | N | Withdrawn   |
| 136894 | M | South Regi A Level or I  | 0 | 90  | Y | Pass        |
| 137903 | M | Oromia Re Lower Tha      | 1 | 60  | N | Pass        |
| 139190 | M | Somalia Re Lower Tha     | 0 | 150 | N | Pass        |
| 139278 | M | Sidamo Re Lower Tha      | 0 | 60  | N | Fail        |
| 139701 | M | Sidamo Re Lower Tha      | 1 | 90  | N | Fail        |
| 141648 | F | South Regi A Level or I  | 0 | 120 | N | Pass        |
| 143752 | F | North Regi Post Gradu    | 0 | 120 | N | Withdrawn   |
| 144562 | M | Tigrai Regi Lower Tha    | 0 | 90  | N | Fail        |
| 144959 | M | South Wes A Level or I   | 0 | 120 | N | Withdrawn   |
| 146738 | M | Addis Abak A Level or I  | 0 | 60  | N | Distinction |
| 148328 | M | Tigrai Regi HE Qualific  | 0 | 90  | N | Withdrawn   |
| 148931 | M | Oromia Re Lower Tha      | 0 | 60  | N | Withdrawn   |
| 150121 | M | Somalia Re Lower Tha     | 3 | 210 | Y | Withdrawn   |
| 152037 | M | Amhara Re Lower Tha      | 0 | 60  | N | Withdrawn   |
| 152587 | F | South Regi Lower Tha     | 1 | 90  | N | Pass        |
| 152887 | M | South Regi Lower Tha     | 0 | 60  | N | Withdrawn   |
| 154057 | M | South Wes Lower Tha      | 0 | 90  | N | Fail        |
| 154059 | M | Addis Abak A Level or I  | 0 | 180 | N | Pass        |
| 154191 | M | Afar Regio Lower Tha     | 0 | 60  | N | Distinction |
| 155298 | M | South Regi A Level or I  | 0 | 60  | N | Pass        |
| 156171 | M | South Wes A Level or I   | 0 | 60  | N | Pass        |
| 156755 | M | South Regi HE Qualific   | 0 | 120 | N | Withdrawn   |
| 157647 | M | Oromia Re Lower Tha      | 0 | 150 | N | Fail        |
| 160310 | F | Afar Regio Lower Tha     | 1 | 60  | N | Fail        |
| 160720 | M | Tigrai Regi Lower Tha    | 1 | 90  | N | Withdrawn   |
| 160934 | M | Tigrai Regi Lower Tha    | 0 | 120 | N | Fail        |
| 160946 | M | South Regi HE Qualific   | 0 | 60  | N | Pass        |
| 162809 | M | Sidamo Re A Level or I   | 0 | 60  | N | Pass        |

|        |   |                |                   |   |     |   |             |
|--------|---|----------------|-------------------|---|-----|---|-------------|
| 163120 | M | Afar Region    | A Level or Higher | 0 | 60  | N | Pass        |
| 168229 | M | Amhara Region  | A Level or Higher | 0 | 90  | N | Distinction |
| 169908 | M | Sidamo Region  | A Level or Higher | 0 | 60  | N | Fail        |
| 170030 | M | Tigray Region  | HE Qualification  | 1 | 60  | N | Distinction |
| 170943 | M | Sidamo Region  | A Level or Higher | 1 | 150 | N | Pass        |
| 171304 | M | Tigray Region  | Lower Than A      | 0 | 60  | N | Fail        |
| 171549 | M | Addis Ababa    | A Level or Higher | 0 | 120 | N | Withdrawn   |
| 171692 | F | Tigray Region  | A Level or Higher | 0 | 90  | N | Fail        |
| 173412 | M | North Region   | HE Qualification  | 0 | 60  | N | Withdrawn   |
| 174468 | M | Addis Ababa    | Lower Than A      | 1 | 60  | N | Fail        |
| 175453 | M | Afar Region    | HE Qualification  | 0 | 60  | N | Pass        |
| 177568 | M | South Region   | A Level or Higher | 2 | 60  | N | Pass        |
| 178118 | M | South Region   | A Level or Higher | 0 | 120 | N | Fail        |
| 178258 | F | South Region   | HE Qualification  | 0 | 270 | N | Withdrawn   |
| 180974 | M | South West     | A Level or Higher | 1 | 60  | N | Pass        |
| 184473 | M | Afar Region    | A Level or Higher | 0 | 60  | N | Pass        |
| 184627 | F | Sidamo Region  | HE Qualification  | 3 | 90  | N | Withdrawn   |
| 184720 | M | Tigray Region  | Lower Than A      | 2 | 90  | N | Withdrawn   |
| 184925 | M | Somalia Region | Lower Than A      | 0 | 60  | N | Withdrawn   |
| 187199 | M | North Region   | Lower Than A      | 0 | 60  | N | Pass        |
| 188524 | F | South Region   | Lower Than A      | 2 | 60  | N | Withdrawn   |
| 190910 | M | Amhara Region  | A Level or Higher | 0 | 120 | N | Fail        |
| 192680 | M | South West     | Lower Than A      | 0 | 90  | N | Pass        |
| 198691 | M | South Region   | Lower Than A      | 0 | 60  | N | Fail        |
| 199361 | M | Amhara Region  | Lower Than A      | 0 | 60  | N | Distinction |
| 200278 | M | Addis Ababa    | A Level or Higher | 0 | 120 | N | Withdrawn   |
| 202713 | F | Sidamo Region  | Lower Than A      | 1 | 60  | Y | Fail        |
| 206342 | M | South Region   | A Level or Higher | 1 | 60  | N | Fail        |
| 206599 | M | South West     | A Level or Higher | 0 | 90  | N | Pass        |
| 227254 | M | Tigray Region  | Lower Than A      | 0 | 120 | N | Fail        |
| 228695 | M | Somalia Region | A Level or Higher | 0 | 120 | N | Pass        |
| 229191 | M | Sidamo Region  | A Level or Higher | 0 | 120 | N | Withdrawn   |
| 229417 | M | Amhara Region  | Lower Than A      | 0 | 60  | N | Fail        |
| 231024 | M | South Region   | Lower Than A      | 0 | 60  | Y | Pass        |
| 231320 | M | Sidamo Region  | Lower Than A      | 0 | 150 | N | Withdrawn   |
| 231606 | M | Tigray Region  | Lower Than A      | 0 | 60  | N | Fail        |
| 232347 | M | South Region   | A Level or Higher | 0 | 180 | N | Pass        |
| 232660 | F | Addis Ababa    | A Level or Higher | 0 | 60  | N | Distinction |
| 232764 | F | South Region   | A Level or Higher | 2 | 90  | N | Pass        |
| 232856 | M | Addis Ababa    | Lower Than A      | 0 | 60  | N | Distinction |
| 233087 | M | Somalia Region | A Level or Higher | 0 | 90  | Y | Distinction |
| 234004 | M | Sidamo Region  | A Level or Higher | 0 | 60  | N | Fail        |
| 234068 | M | Addis Ababa    | Lower Than A      | 0 | 90  | N | Fail        |
| 235131 | F | Sidamo Region  | HE Qualification  | 2 | 120 | N | Withdrawn   |
| 235670 | M | Sidamo Region  | Lower Than A      | 0 | 90  | N | Pass        |
| 235706 | M | South Region   | Lower Than A      | 1 | 60  | N | Fail        |
| 235978 | M | Sidamo Region  | A Level or Higher | 0 | 90  | N | Pass        |



|        |   |                                             |   |     |   |             |
|--------|---|---------------------------------------------|---|-----|---|-------------|
| 236150 | F | Tigrai Region HE Qualification              | 0 | 120 | N | Withdrawn   |
| 237387 | F | Addis Ababa HE Qualification                | 0 | 60  | N | Withdrawn   |
| 238150 | M | Afar Region A Level or Higher               | 0 | 60  | N | Pass        |
| 241039 | M | South Region Lower Than A Level or Higher   | 0 | 60  | N | Pass        |
| 241792 | M | South Region A Level or Higher              | 0 | 90  | N | Withdrawn   |
| 242491 | M | Somalia Region A Level or Higher            | 1 | 120 | Y | Distinction |
| 243351 | M | South Region A Level or Higher              | 0 | 90  | N | Withdrawn   |
| 243396 | M | Amhara Region Lower Than A Level or Higher  | 0 | 120 | N | Fail        |
| 244205 | M | Amhara Region A Level or Higher             | 0 | 60  | N | Pass        |
| 245283 | M | Sidamo Region A Level or Higher             | 0 | 120 | N | Pass        |
| 248882 | M | Sidamo Region HE Qualification              | 0 | 60  | N | Pass        |
| 249750 | F | Afar Region HE Qualification                | 0 | 90  | N | Pass        |
| 251405 | M | South West A Level or Higher                | 1 | 60  | N | Pass        |
| 251965 | M | Sidamo Region A Level or Higher             | 0 | 120 | N | Fail        |
| 253516 | M | Sidamo Region Lower Than A Level or Higher  | 0 | 60  | Y | Fail        |
| 253767 | M | Oromia Region A Level or Higher             | 0 | 270 | N | Pass        |
| 254446 | M | Addis Ababa A Level or Higher               | 0 | 60  | N | Pass        |
| 255310 | M | Somalia Region HE Qualification             | 0 | 90  | N | Pass        |
| 256905 | M | North Region Lower Than A Level or Higher   | 0 | 120 | N | Fail        |
| 257887 | M | South West HE Qualification                 | 0 | 60  | N | Pass        |
| 257970 | M | Somalia Region Lower Than A Level or Higher | 1 | 60  | N | Withdrawn   |
| 259609 | M | Somalia Region Lower Than A Level or Higher | 2 | 180 | Y | Withdrawn   |
| 261205 | M | North Region Lower Than A Level or Higher   | 1 | 60  | N | Fail        |
| 261525 | M | Oromia Region Lower Than A Level or Higher  | 2 | 120 | N | Withdrawn   |
| 262403 | F | South Region A Level or Higher              | 0 | 120 | N | Pass        |
| 264164 | M | Afar Region A Level or Higher               | 0 | 60  | N | Distinction |
| 264924 | M | South Region A Level or Higher              | 0 | 120 | N | Withdrawn   |
| 265268 | M | Amhara Region Lower Than A Level or Higher  | 1 | 120 | N | Pass        |
| 265978 | M | North Region Lower Than A Level or Higher   | 0 | 60  | N | Pass        |
| 268153 | M | Amhara Region A Level or Higher             | 0 | 90  | N | Pass        |
| 268343 | F | Somalia Region Lower Than A Level or Higher | 0 | 60  | N | Withdrawn   |
| 269245 | M | Sidamo Region HE Qualification              | 0 | 120 | N | Withdrawn   |
| 269508 | M | South West HE Qualification                 | 0 | 60  | N | Pass        |
| 271274 | F | Addis Ababa Lower Than A Level or Higher    | 1 | 60  | N | Fail        |
| 271702 | M | South Region Lower Than A Level or Higher   | 0 | 120 | N | Withdrawn   |
| 272623 | M | Sidamo Region A Level or Higher             | 0 | 120 | N | Withdrawn   |
| 273442 | M | North Region A Level or Higher              | 0 | 60  | N | Pass        |
| 273782 | M | Tigrai Region HE Qualification              | 0 | 60  | N | Pass        |
| 274443 | M | Addis Ababa Lower Than A Level or Higher    | 0 | 60  | N | Fail        |
| 276388 | M | Oromia Region A Level or Higher             | 0 | 60  | N | Pass        |
| 276808 | F | Amhara Region A Level or Higher             | 1 | 60  | N | Pass        |
| 278955 | M | Somalia Region Lower Than A Level or Higher | 0 | 60  | N | Pass        |
| 279069 | M | Amhara Region Lower Than A Level or Higher  | 1 | 120 | N | Withdrawn   |
| 279085 | M | Sidamo Region HE Qualification              | 0 | 60  | N | Pass        |
| 279750 | M | Afar Region Lower Than A Level or Higher    | 0 | 60  | N | Pass        |
| 281638 | F | South West A Level or Higher                | 0 | 90  | N | Pass        |
| 282385 | M | Afar Region HE Qualification                | 0 | 60  | N | Fail        |

|        |   |                           |   |     |   |             |
|--------|---|---------------------------|---|-----|---|-------------|
| 282975 | F | Sidamo Re, A Level or I   | 0 | 60  | N | Pass        |
| 283953 | F | Sidamo Re, A Level or I   | 0 | 60  | N | Distinction |
| 284036 | M | South Wes Lower Tha       | 2 | 60  | N | Fail        |
| 284395 | M | Sidamo Re, A Level or I   | 1 | 60  | N | Pass        |
| 284636 | M | Afar Regio, Lower Tha     | 0 | 60  | N | Fail        |
| 284742 | M | Somalia Re Lower Tha      | 0 | 60  | N | Withdrawn   |
| 286442 | M | Afar Regio, HE Qualific   | 0 | 60  | Y | Withdrawn   |
| 287079 | M | Sidamo Re, HE Qualific    | 1 | 60  | N | Withdrawn   |
| 289221 | F | South Regi A Level or I   | 0 | 90  | N | Pass        |
| 289304 | M | Sidamo Re, Lower Tha      | 0 | 90  | Y | Pass        |
| 289826 | F | Afar Regio, Lower Tha     | 1 | 150 | N | Withdrawn   |
| 290521 | M | Sidamo Re, Lower Tha      | 0 | 120 | N | Pass        |
| 291237 | M | Sidamo Re, A Level or I   | 0 | 180 | N | Distinction |
| 291516 | F | Sidamo Re, Lower Tha      | 2 | 60  | N | Fail        |
| 291745 | M | Afar Regio, A Level or I  | 0 | 60  | N | Distinction |
| 293317 | F | South Regi A Level or I   | 0 | 60  | N | Withdrawn   |
| 295255 | M | South Wes A Level or I    | 0 | 60  | N | Pass        |
| 296100 | M | Sidamo Re, HE Qualific    | 0 | 150 | N | Withdrawn   |
| 299281 | M | North Regi A Level or I   | 1 | 60  | N | Pass        |
| 299886 | F | Sidamo Re, Lower Tha      | 0 | 210 | N | Pass        |
| 301128 | M | Somalia Re A Level or I   | 0 | 180 | N | Withdrawn   |
| 302071 | M | Oromia Re Lower Tha       | 0 | 90  | Y | Fail        |
| 302566 | M | South Wes Lower Tha       | 0 | 120 | Y | Fail        |
| 303937 | M | Tigrai Regi, Lower Tha    | 0 | 60  | N | Fail        |
| 304240 | M | Oromia Re A Level or I    | 0 | 90  | N | Pass        |
| 304589 | M | South Regi A Level or I   | 0 | 120 | N | Distinction |
| 305858 | F | South Regi A Level or I   | 0 | 90  | Y | Pass        |
| 307245 | M | North Regi Lower Tha      | 2 | 60  | N | Fail        |
| 307676 | M | South Regi A Level or I   | 1 | 120 | N | Fail        |
| 309150 | M | Addis Abak A Level or I   | 1 | 60  | N | Withdrawn   |
| 309893 | M | Amhara Re A Level or I    | 0 | 60  | N | Pass        |
| 310646 | M | Sidamo Re, Lower Tha      | 0 | 90  | N | Pass        |
| 310899 | M | South Regi A Level or I   | 0 | 60  | N | Withdrawn   |
| 311151 | M | North Regi Lower Tha      | 2 | 60  | N | Withdrawn   |
| 312760 | M | South Wes A Level or I    | 0 | 120 | N | Pass        |
| 313206 | M | Tigrai Regi, Lower Tha    | 1 | 60  | Y | Fail        |
| 313700 | M | South Wes Lower Tha       | 0 | 90  | N | Fail        |
| 314776 | M | Addis Abak Lower Tha      | 0 | 60  | N | Pass        |
| 315808 | M | Oromia Re A Level or I    | 0 | 120 | N | Distinction |
| 316061 | M | Amhara Re Lower Tha       | 0 | 180 | Y | Withdrawn   |
| 316098 | M | South Regi A Level or I   | 1 | 60  | N | Pass        |
| 316541 | F | Afar Regio, HE Qualific   | 0 | 120 | N | Distinction |
| 318627 | M | Somalia Re HE Qualific    | 0 | 60  | N | Distinction |
| 319578 | M | Somalia Re Lower Tha      | 1 | 90  | N | Pass        |
| 320437 | M | Tigrai Regi, A Level or I | 0 | 90  | N | Pass        |
| 321486 | F | South Regi A Level or I   | 0 | 60  | Y | Withdrawn   |
| 321969 | F | Sidamo Re, Lower Tha      | 0 | 60  | N | Withdrawn   |

|        |   |                          |   |     |   |             |
|--------|---|--------------------------|---|-----|---|-------------|
| 323480 | F | South Regi HE Qualific   | 1 | 60  | N | Pass        |
| 323984 | M | South Wes A Level or I   | 1 | 60  | N | Pass        |
| 324331 | M | Amhara Re Lower Thar     | 0 | 60  | N | Withdrawn   |
| 324672 | M | South Regi Lower Thar    | 0 | 60  | N | Fail        |
| 325368 | M | Afar Regioi A Level or I | 3 | 90  | N | Fail        |
| 325750 | M | Afar Regioi HE Qualific  | 1 | 90  | N | Withdrawn   |
| 326056 | M | Addis Abak Lower Thar    | 0 | 60  | N | Withdrawn   |
| 329655 | F | South Wes Lower Thar     | 1 | 90  | N | Fail        |
| 330192 | M | Afar Regioi Lower Thar   | 0 | 60  | N | Pass        |
| 330347 | M | South Regi HE Qualific   | 1 | 60  | N | Fail        |
| 330669 | F | Sidamo Re Lower Thar     | 0 | 180 | N | Withdrawn   |
| 330723 | M | Tigrai Regi A Level or I | 1 | 60  | N | Withdrawn   |
| 331039 | M | Addis Abak A Level or I  | 1 | 120 | Y | Pass        |
| 331417 | M | South Wes A Level or I   | 0 | 120 | N | Pass        |
| 333710 | M | South Wes A Level or I   | 1 | 90  | N | Fail        |
| 334476 | F | Sidamo Re A Level or I   | 0 | 60  | N | Pass        |
| 334669 | M | Somalia Re A Level or I  | 0 | 120 | N | Withdrawn   |
| 335476 | M | Tigrai Regi A Level or I | 1 | 90  | N | Pass        |
| 335562 | M | North Regi A Level or I  | 0 | 90  | N | Pass        |
| 335582 | M | Oromia Re A Level or I   | 0 | 120 | N | Distinction |
| 335644 | M | South Wes HE Qualific    | 0 | 120 | N | Fail        |
| 335726 | F | Amhara Re Lower Thar     | 1 | 60  | N | Withdrawn   |
| 338536 | M | South Regi A Level or I  | 1 | 60  | N | Pass        |
| 338806 | M | North Regi Lower Thar    | 2 | 90  | N | Fail        |
| 338975 | M | Addis Abak A Level or I  | 0 | 150 | N | Pass        |
| 339624 | M | Sidamo Re A Level or I   | 0 | 120 | N | Withdrawn   |
| 340647 | F | Oromia Re HE Qualific    | 0 | 90  | N | Pass        |
| 340751 | F | South Regi Lower Thar    | 0 | 90  | N | Withdrawn   |
| 341096 | M | South Regi Lower Thar    | 0 | 120 | N | Pass        |
| 341361 | M | Sidamo Re HE Qualific    | 1 | 60  | N | Pass        |
| 341470 | F | Oromia Re A Level or I   | 0 | 120 | N | Pass        |
| 341839 | M | Addis Abak Lower Thar    | 0 | 90  | N | Withdrawn   |
| 342155 | M | Sidamo Re Lower Thar     | 0 | 120 | N | Pass        |
| 342208 | M | South Wes A Level or I   | 1 | 180 | Y | Withdrawn   |
| 342953 | M | Tigrai Regi A Level or I | 0 | 60  | N | Pass        |
| 343419 | F | Oromia Re A Level or I   | 0 | 60  | N | Fail        |
| 343658 | M | Afar Regioi Lower Thar   | 2 | 90  | N | Fail        |
| 343828 | F | Sidamo Re Lower Thar     | 1 | 180 | N | Pass        |
| 344787 | F | Sidamo Re Lower Thar     | 0 | 120 | N | Pass        |
| 347484 | M | Oromia Re Lower Thar     | 0 | 60  | N | Pass        |
| 347809 | F | Afar Regioi HE Qualific  | 0 | 60  | N | Pass        |
| 348717 | M | Addis Abak Lower Thar    | 2 | 60  | N | Pass        |
| 348783 | M | Amhara Re A Level or I   | 0 | 60  | N | Distinction |
| 349219 | M | South Regi A Level or I  | 1 | 270 | N | Fail        |
| 349247 | M | Somalia Re Lower Thar    | 0 | 60  | Y | Withdrawn   |
| 349676 | M | South Regi Lower Thar    | 0 | 60  | N | Pass        |
| 351170 | M | South Wes Lower Thar     | 0 | 120 | N | Pass        |

|        |   |                         |   |     |   |             |
|--------|---|-------------------------|---|-----|---|-------------|
| 351505 | M | Oromia Re A Level or I  | 0 | 90  | N | Pass        |
| 352083 | M | South Regi A Level or I | 0 | 60  | N | Withdrawn   |
| 352102 | F | South Wes Lower Thar    | 1 | 60  | N | Withdrawn   |
| 353066 | M | Somalia Re A Level or I | 0 | 90  | N | Withdrawn   |
| 353790 | M | Sidamo Re Lower Thar    | 0 | 60  | N | Fail        |
| 354550 | M | Tigrai Regi Lower Thar  | 0 | 60  | N | Fail        |
| 355293 | M | Somalia Re Lower Thar   | 1 | 150 | N | Withdrawn   |
| 355335 | M | South Wes Lower Thar    | 2 | 90  | N | Pass        |
| 356397 | M | Oromia Re Lower Thar    | 2 | 90  | N | Fail        |
| 357851 | M | Addis Abak Lower Thar   | 1 | 90  | Y | Withdrawn   |
| 359149 | M | Somalia Re Lower Thar   | 0 | 60  | N | Withdrawn   |
| 360581 | M | Sidamo Re A Level or I  | 0 | 60  | N | Fail        |
| 360747 | M | South Regi Lower Thar   | 0 | 60  | N | Pass        |
| 360986 | M | Sidamo Re A Level or I  | 1 | 120 | N | Pass        |
| 361837 | M | Tigrai Regi HE Qualific | 2 | 120 | N | Fail        |
| 363273 | F | Tigrai Regi Lower Thar  | 0 | 90  | N | Fail        |
| 363738 | M | Addis Abak Lower Thar   | 0 | 60  | N | Withdrawn   |
| 364790 | F | Amhara Re A Level or I  | 0 | 90  | N | Distinction |
| 364974 | M | North Regi Lower Thar   | 1 | 180 | N | Pass        |
| 367510 | M | Sidamo Re A Level or I  | 1 | 120 | Y | Withdrawn   |
| 367605 | F | South Wes A Level or I  | 0 | 90  | N | Pass        |
| 368315 | M | Sidamo Re Lower Thar    | 0 | 120 | Y | Pass        |
| 368935 | M | Afar Regio HE Qualific  | 0 | 120 | N | Fail        |
| 369208 | M | Somalia Re Lower Thar   | 0 | 60  | N | Pass        |
| 369826 | M | South Regi A Level or I | 0 | 60  | N | Withdrawn   |
| 370934 | M | Sidamo Re Lower Thar    | 1 | 60  | N | Withdrawn   |
| 371133 | M | Afar Regio Lower Thar   | 0 | 60  | N | Withdrawn   |
| 371247 | M | Somalia Re HE Qualific  | 1 | 120 | N | Pass        |
| 371869 | M | Tigrai Regi HE Qualific | 0 | 240 | N | Pass        |
| 372262 | F | Sidamo Re A Level or I  | 0 | 90  | N | Distinction |
| 372619 | M | Somalia Re Lower Thar   | 0 | 60  | N | Withdrawn   |
| 377705 | M | Addis Abak A Level or I | 1 | 60  | N | Fail        |
| 379070 | M | Afar Regio HE Qualific  | 0 | 60  | N | Distinction |
| 379843 | F | Somalia Re Lower Thar   | 0 | 60  | Y | Pass        |
| 380161 | M | Amhara Re A Level or I  | 0 | 90  | N | Withdrawn   |
| 380435 | F | Somalia Re HE Qualific  | 0 | 120 | N | Distinction |
| 380710 | M | Sidamo Re Lower Thar    | 0 | 180 | N | Withdrawn   |
| 381058 | M | Sidamo Re A Level or I  | 0 | 60  | N | Fail        |
| 381365 | M | Amhara Re Lower Thar    | 2 | 120 | N | Withdrawn   |
| 381414 | M | Oromia Re Lower Thar    | 0 | 120 | N | Withdrawn   |
| 381959 | M | Tigrai Regi Lower Thar  | 1 | 60  | N | Fail        |
| 382125 | M | North Regi Lower Thar   | 1 | 90  | N | Withdrawn   |
| 382156 | M | Tigrai Regi Lower Thar  | 1 | 60  | N | Fail        |
| 382738 | M | South Regi Lower Thar   | 0 | 60  | N | Pass        |
| 383517 | F | Oromia Re A Level or I  | 0 | 120 | N | Pass        |
| 384227 | M | Sidamo Re Lower Thar    | 0 | 120 | N | Pass        |
| 385033 | M | Sidamo Re HE Qualific   | 0 | 60  | N | Pass        |

|        |   |                          |   |     |   |             |
|--------|---|--------------------------|---|-----|---|-------------|
| 385195 | M | Sidamo Re Lower Tha      | 0 | 60  | N | Pass        |
| 385209 | M | Sidamo Re Lower Tha      | 1 | 90  | Y | Fail        |
| 385547 | M | Amhara Re Lower Tha      | 0 | 180 | N | Pass        |
| 387507 | M | South Regi A Level or I  | 0 | 120 | N | Pass        |
| 387941 | M | Addis Abak Lower Tha     | 0 | 60  | N | Withdrawn   |
| 388754 | M | Sidamo Re Lower Tha      | 0 | 120 | N | Distinction |
| 389208 | M | Tigrai Regi A Level or I | 0 | 90  | N | Pass        |
| 391187 | M | Afar Regio HE Qualific   | 1 | 60  | N | Pass        |
| 392210 | M | Somalia Re Lower Tha     | 0 | 60  | N | Fail        |
| 392427 | M | Addis Abak A Level or I  | 0 | 60  | N | Fail        |
| 392692 | F | Amhara Re A Level or I   | 3 | 180 | N | Withdrawn   |
| 393526 | F | Sidamo Re Lower Tha      | 0 | 60  | Y | Distinction |
| 393698 | M | South Regi Lower Tha     | 0 | 60  | N | Withdrawn   |
| 393827 | F | Sidamo Re A Level or I   | 1 | 150 | N | Pass        |
| 394218 | M | North Regi A Level or I  | 1 | 60  | N | Fail        |
| 394239 | M | Afar Regio A Level or I  | 0 | 60  | N | Pass        |
| 395107 | F | Addis Abak Lower Tha     | 0 | 180 | N | Withdrawn   |
| 395373 | M | North Regi A Level or I  | 2 | 120 | N | Pass        |
| 395696 | M | Amhara Re Lower Tha      | 0 | 60  | N | Pass        |
| 395814 | M | Amhara Re A Level or I   | 0 | 120 | N | Withdrawn   |
| 396502 | M | Oromia Re A Level or I   | 1 | 60  | N | Pass        |
| 397292 | F | Amhara Re Lower Tha      | 0 | 60  | N | Withdrawn   |
| 397470 | M | South Regi A Level or I  | 0 | 60  | N | Pass        |
| 397506 | F | South Regi Lower Tha     | 0 | 120 | N | Pass        |
| 399863 | M | South Regi A Level or I  | 0 | 270 | N | Withdrawn   |
| 400145 | M | Afar Regio A Level or I  | 1 | 90  | N | Pass        |
| 400266 | M | Sidamo Re A Level or I   | 3 | 90  | N | Pass        |
| 401824 | M | Tigrai Regi Lower Tha    | 2 | 60  | N | Fail        |
| 401866 | M | Somalia Re Lower Tha     | 0 | 180 | N | Withdrawn   |
| 402458 | F | South Wes A Level or I   | 1 | 60  | N | Withdrawn   |
| 402662 | M | Addis Abak A Level or I  | 0 | 60  | Y | Pass        |
| 404536 | M | Tigrai Regi A Level or I | 0 | 60  | N | Pass        |
| 404631 | F | Tigrai Regi Lower Tha    | 0 | 60  | N | Pass        |
| 405314 | M | Amhara Re A Level or I   | 1 | 120 | N | Fail        |
| 406254 | M | Somalia Re Lower Tha     | 0 | 60  | N | Pass        |
| 409040 | M | Addis Abak Lower Tha     | 1 | 90  | N | Pass        |
| 409276 | F | Tigrai Regi Lower Tha    | 0 | 180 | N | Fail        |
| 410666 | M | South Regi A Level or I  | 2 | 120 | N | Withdrawn   |
| 410838 | F | Somalia Re A Level or I  | 0 | 60  | Y | Pass        |
| 411939 | M | South Regi A Level or I  | 1 | 180 | N | Withdrawn   |
| 412697 | M | North Regi A Level or I  | 2 | 210 | N | Pass        |
| 413137 | M | South Regi HE Qualific   | 0 | 60  | N | Withdrawn   |
| 413259 | F | Afar Regio A Level or I  | 3 | 240 | N | Withdrawn   |
| 413747 | M | South Wes Lower Tha      | 0 | 60  | N | Fail        |
| 413950 | M | North Regi Lower Tha     | 1 | 60  | N | Fail        |
| 415724 | M | Tigrai Regi HE Qualific  | 0 | 90  | N | Withdrawn   |
| 416304 | M | Addis Abak HE Qualific   | 0 | 120 | N | Pass        |

|        |   |                          |   |     |   |             |
|--------|---|--------------------------|---|-----|---|-------------|
| 416426 | M | Addis Abat HE Qualific   | 0 | 120 | N | Withdrawn   |
| 416696 | F | Afar Region HE Qualific  | 1 | 60  | N | Withdrawn   |
| 417135 | F | North Regi A Level or I  | 1 | 60  | N | Fail        |
| 417414 | M | Sidamo Re HE Qualific    | 1 | 90  | N | Pass        |
| 417663 | M | Sidamo Re A Level or I   | 0 | 60  | N | Pass        |
| 418007 | F | South Regi HE Qualific   | 0 | 60  | N | Distinction |
| 418129 | M | Sidamo Re Lower Than     | 0 | 120 | N | Withdrawn   |
| 418340 | F | Afar Region HE Qualific  | 0 | 60  | N | Fail        |
| 419024 | F | South Wes A Level or I   | 0 | 60  | N | Pass        |
| 419565 | M | Addis Abat Lower Than    | 1 | 180 | N | Fail        |
| 419990 | M | Amhara Re A Level or I   | 0 | 60  | N | Pass        |
| 420867 | M | South Wes Lower Than     | 0 | 240 | N | Pass        |
| 421070 | F | Afar Region HE Qualific  | 0 | 120 | N | Withdrawn   |
| 422006 | F | Sidamo Re Lower Than     | 0 | 120 | N | Pass        |
| 423544 | M | Afar Region HE Qualific  | 0 | 60  | N | Withdrawn   |
| 424069 | F | Tigrai Regi Lower Than   | 0 | 120 | N | Withdrawn   |
| 424171 | M | South Regi A Level or I  | 0 | 90  | N | Pass        |
| 424437 | F | Sidamo Re A Level or I   | 0 | 120 | N | Pass        |
| 425218 | M | Addis Abat HE Qualific   | 0 | 60  | N | Fail        |
| 426137 | M | South Wes A Level or I   | 0 | 120 | N | Withdrawn   |
| 426768 | M | South Regi HE Qualific   | 0 | 60  | N | Withdrawn   |
| 427802 | F | Oromia Re A Level or I   | 0 | 150 | Y | Pass        |
| 428195 | M | Tigrai Regi Lower Than   | 1 | 60  | N | Fail        |
| 429194 | M | Sidamo Re HE Qualific    | 1 | 60  | N | Withdrawn   |
| 429832 | M | South Wes HE Qualific    | 1 | 60  | N | Fail        |
| 432336 | M | Amhara Re Lower Than     | 0 | 120 | N | Fail        |
| 432474 | F | Sidamo Re A Level or I   | 0 | 60  | N | Fail        |
| 432592 | M | Oromia Re A Level or I   | 0 | 90  | N | Distinction |
| 432703 | M | Somalia Re A Level or I  | 0 | 60  | N | Pass        |
| 434617 | M | Tigrai Regi Lower Than   | 1 | 120 | N | Fail        |
| 436044 | M | North Regi A Level or I  | 1 | 180 | N | Fail        |
| 438063 | M | Tigrai Regi A Level or I | 1 | 60  | Y | Withdrawn   |
| 438313 | M | South Regi A Level or I  | 0 | 180 | N | Fail        |
| 438644 | F | North Regi A Level or I  | 2 | 60  | N | Withdrawn   |
| 439053 | M | South Wes Lower Than     | 0 | 120 | N | Withdrawn   |
| 439203 | F | Tigrai Regi Lower Than   | 0 | 90  | N | Fail        |
| 440851 | M | Afar Region Lower Than   | 3 | 60  | N | Fail        |
| 441606 | M | Somalia Re Lower Than    | 2 | 120 | N | Fail        |
| 442432 | M | South Wes Lower Than     | 2 | 100 | N | Fail        |
| 442670 | M | Oromia Re Lower Than     | 2 | 120 | N | Withdrawn   |
| 443300 | M | South Wes Lower Than     | 0 | 120 | N | Withdrawn   |
| 443753 | M | Afar Region HE Qualific  | 1 | 60  | N | Fail        |
| 443954 | M | Tigrai Regi A Level or I | 0 | 60  | N | Withdrawn   |
| 444266 | M | South Wes A Level or I   | 1 | 60  | N | Pass        |
| 444619 | M | South Regi A Level or I  | 0 | 90  | N | Withdrawn   |
| 444697 | M | Oromia Re Lower Than     | 0 | 120 | N | Pass        |
| 444856 | M | South Regi Lower Than    | 0 | 60  | N | Fail        |

|        |   |                          |   |     |   |             |
|--------|---|--------------------------|---|-----|---|-------------|
| 445410 | M | Oromia Re A Level or l   | 0 | 60  | N | Pass        |
| 445728 | F | South Regi Lower Tha     | 0 | 120 | Y | Withdrawn   |
| 445776 | M | Amhara Re A Level or l   | 0 | 60  | N | Pass        |
| 446628 | M | Amhara Re Lower Tha      | 0 | 90  | N | Pass        |
| 446746 | M | Sidamo Re Lower Tha      | 1 | 60  | N | Withdrawn   |
| 447374 | M | South Wes HE Qualific    | 0 | 60  | N | Withdrawn   |
| 447459 | F | Tigrai Regi Lower Tha    | 0 | 270 | N | Fail        |
| 464522 | M | Addis Abak Lower Tha     | 0 | 60  | Y | Withdrawn   |
| 464616 | M | Sidamo Re A Level or l   | 1 | 90  | N | Pass        |
| 464981 | M | Afar Regio HE Qualific   | 0 | 60  | N | Distinction |
| 465009 | M | North Regi A Level or l  | 1 | 90  | N | Withdrawn   |
| 465893 | M | Sidamo Re A Level or l   | 0 | 60  | N | Distinction |
| 465900 | M | Tigrai Regi A Level or l | 0 | 60  | N | Pass        |
| 466425 | M | South Wes HE Qualific    | 0 | 150 | N | Fail        |
| 466807 | M | South Wes Lower Tha      | 0 | 90  | N | Withdrawn   |
| 467243 | F | North Regi A Level or l  | 2 | 120 | N | Fail        |
| 467291 | M | South Regi A Level or l  | 0 | 120 | N | Withdrawn   |
| 467504 | M | South Wes A Level or l   | 0 | 120 | N | Pass        |
| 467524 | M | Afar Regio A Level or l  | 0 | 60  | N | Pass        |
| 467685 | M | Afar Regio Lower Tha     | 0 | 60  | N | Fail        |
| 467901 | M | South Regi A Level or l  | 0 | 120 | N | Fail        |
| 468947 | M | Addis Abak A Level or l  | 0 | 60  | N | Withdrawn   |
| 470001 | M | South Regi Lower Tha     | 0 | 90  | N | Distinction |
| 470037 | F | North Regi No Formal     | 0 | 150 | N | Withdrawn   |
| 470461 | M | Afar Regio Lower Tha     | 0 | 60  | N | Fail        |
| 470870 | F | South Regi A Level or l  | 0 | 90  | N | Fail        |
| 471973 | M | Sidamo Re Lower Tha      | 0 | 60  | N | Pass        |
| 473081 | F | Afar Regio Lower Tha     | 1 | 180 | N | Withdrawn   |
| 473491 | M | North Regi Lower Tha     | 1 | 60  | N | Pass        |
| 473896 | M | Amhara Re A Level or l   | 1 | 60  | Y | Fail        |
| 474126 | M | Addis Abak Lower Tha     | 0 | 120 | N | Pass        |
| 474949 | M | Sidamo Re A Level or l   | 0 | 60  | N | Pass        |
| 475253 | M | South Regi A Level or l  | 1 | 90  | N | Pass        |
| 475699 | M | South Regi A Level or l  | 0 | 90  | N | Withdrawn   |
| 476520 | M | Oromia Re Lower Tha      | 0 | 90  | Y | Pass        |
| 478332 | M | Sidamo Re A Level or l   | 0 | 120 | N | Pass        |
| 478583 | F | Sidamo Re A Level or l   | 0 | 70  | N | Fail        |
| 479828 | M | Somalia Re A Level or l  | 2 | 150 | N | Pass        |
| 479845 | M | Sidamo Re A Level or l   | 0 | 120 | N | Pass        |
| 480025 | M | Somalia Re A Level or l  | 0 | 60  | N | Fail        |
| 480910 | M | Afar Regio A Level or l  | 1 | 60  | N | Withdrawn   |
| 481092 | F | Addis Abak A Level or l  | 0 | 240 | Y | Withdrawn   |
| 481314 | M | Sidamo Re A Level or l   | 1 | 90  | N | Pass        |
| 482554 | M | Afar Regio Lower Tha     | 0 | 60  | N | Withdrawn   |
| 482580 | M | Amhara Re Lower Tha      | 0 | 120 | Y | Withdrawn   |
| 483626 | M | Somalia Re A Level or l  | 1 | 120 | N | Pass        |
| 483724 | M | Tigrai Regi A Level or l | 1 | 60  | N | Fail        |

|        |   |                          |   |     |   |             |
|--------|---|--------------------------|---|-----|---|-------------|
| 484125 | M | South Wes Lower Thar     | 1 | 120 | N | Fail        |
| 484242 | M | Tigray Regi A Level or I | 1 | 120 | N | Fail        |
| 484312 | M | Sidamo Re A Level or I   | 1 | 90  | N | Fail        |
| 484475 | M | North Regi A Level or I  | 0 | 60  | N | Withdrawn   |
| 484574 | F | Afar Regi Lower Thar     | 0 | 60  | N | Fail        |
| 485671 | M | Addis Abak Lower Thar    | 1 | 150 | Y | Pass        |
| 485885 | M | Somalia Re A Level or I  | 0 | 90  | N | Pass        |
| 486473 | F | South Regi A Level or I  | 1 | 60  | N | Withdrawn   |
| 486511 | M | South Wes Lower Thar     | 0 | 60  | N | Pass        |
| 486551 | M | South Regi A Level or I  | 0 | 60  | N | Pass        |
| 486948 | M | South Wes HE Qualific    | 1 | 60  | N | Fail        |
| 487002 | F | Oromia Re A Level or I   | 0 | 180 | N | Withdrawn   |
| 488136 | M | South Regi Lower Thar    | 1 | 120 | N | Withdrawn   |
| 488324 | M | Sidamo Re A Level or I   | 0 | 120 | N | Fail        |
| 488394 | M | Addis Abak Lower Thar    | 0 | 60  | N | Pass        |
| 489087 | M | Afar Regi Lower Thar     | 0 | 60  | N | Pass        |
| 489146 | F | South Wes Lower Thar     | 1 | 60  | N | Fail        |
| 489560 | M | South Regi A Level or I  | 0 | 150 | N | Pass        |
| 490449 | M | South Regi No Formal     | 0 | 60  | N | Pass        |
| 490505 | M | South Regi HE Qualific   | 0 | 100 | N | Distinction |
| 491011 | M | Oromia Re A Level or I   | 1 | 120 | Y | Withdrawn   |
| 491606 | M | South Regi A Level or I  | 0 | 60  | N | Pass        |
| 491688 | M | Oromia Re Lower Thar     | 0 | 210 | Y | Withdrawn   |
| 491756 | M | South Regi Lower Thar    | 1 | 90  | Y | Withdrawn   |
| 492557 | M | Amhara Re Lower Thar     | 1 | 60  | N | Withdrawn   |
| 492851 | M | South Wes Lower Thar     | 0 | 120 | N | Pass        |
| 493067 | M | Sidamo Re HE Qualific    | 1 | 60  | N | Withdrawn   |
| 493539 | M | Somalia Re Lower Thar    | 0 | 60  | N | Pass        |
| 494046 | M | Sidamo Re Lower Thar     | 0 | 150 | N | Withdrawn   |
| 494143 | M | South Wes Lower Thar     | 1 | 60  | Y | Fail        |
| 494191 | M | Addis Abak A Level or I  | 0 | 60  | N | Withdrawn   |
| 494335 | M | Sidamo Re Lower Thar     | 1 | 180 | Y | Withdrawn   |
| 494414 | M | South Regi HE Qualific   | 0 | 90  | N | Withdrawn   |
| 494495 | M | Somalia Re A Level or I  | 0 | 180 | N | Pass        |
| 494975 | M | Addis Abak Lower Thar    | 0 | 60  | Y | Withdrawn   |
| 495948 | M | Amhara Re Lower Thar     | 0 | 60  | N | Fail        |
| 496801 | M | Sidamo Re Lower Thar     | 0 | 60  | N | Fail        |
| 496981 | F | Addis Abak Lower Thar    | 1 | 120 | N | Withdrawn   |
| 497349 | M | Afar Regi A Level or I   | 1 | 60  | Y | Fail        |
| 498031 | F | South Regi A Level or I  | 0 | 90  | N | Pass        |
| 498898 | F | South Regi Lower Thar    | 0 | 120 | N | Withdrawn   |
| 498972 | M | South Regi A Level or I  | 1 | 120 | N | Fail        |
| 499386 | M | South Regi No Formal     | 1 | 60  | N | Pass        |
| 499564 | M | South Regi Lower Thar    | 0 | 60  | N | Pass        |
| 499768 | F | Sidamo Re HE Qualific    | 0 | 60  | N | Withdrawn   |
| 500067 | M | Afar Regi HE Qualific    | 1 | 60  | N | Fail        |
| 500099 | M | North Regi A Level or I  | 1 | 120 | N | Withdrawn   |



|        |   |                          |   |     |   |             |
|--------|---|--------------------------|---|-----|---|-------------|
| 500137 | F | South Regi Lower Tha     | 1 | 150 | Y | Withdrawn   |
| 500772 | M | Addis Abak A Level or I  | 0 | 60  | N | Pass        |
| 501336 | M | Tigrai Regi A Level or I | 1 | 120 | N | Pass        |
| 501425 | F | Tigrai Regi Lower Tha    | 0 | 60  | N | Pass        |
| 501871 | M | Amhara Re Lower Tha      | 0 | 60  | N | Pass        |
| 501922 | M | Sidamo Re Lower Tha      | 1 | 120 | N | Fail        |
| 502249 | M | Addis Abak A Level or I  | 1 | 60  | Y | Pass        |
| 502361 | M | South Regi Lower Tha     | 1 | 90  | N | Pass        |
| 502517 | M | South Regi A Level or I  | 2 | 60  | N | Pass        |
| 502531 | M | South Regi Lower Tha     | 2 | 150 | N | Fail        |
| 502696 | M | South Regi A Level or I  | 1 | 90  | N | Withdrawn   |
| 502779 | M | South Wes A Level or I   | 0 | 90  | Y | Withdrawn   |
| 503352 | M | Sidamo Re A Level or I   | 0 | 120 | N | Distinction |
| 503401 | M | South Regi Lower Tha     | 0 | 130 | N | Withdrawn   |
| 503477 | M | Somalia Re A Level or I  | 0 | 60  | N | Pass        |
| 503684 | M | Addis Abak Lower Tha     | 0 | 60  | N | Fail        |
| 503764 | M | Oromia Re Lower Tha      | 0 | 60  | N | Pass        |
| 504076 | F | South Regi Lower Tha     | 0 | 120 | N | Pass        |
| 504105 | M | Afar Regi A Level or I   | 0 | 60  | N | Pass        |
| 504300 | M | North Regi Lower Tha     | 0 | 60  | N | Withdrawn   |
| 504321 | F | Amhara Re A Level or I   | 0 | 60  | N | Pass        |
| 504700 | M | South Wes A Level or I   | 0 | 120 | N | Withdrawn   |
| 504834 | F | Tigrai Regi HE Qualific  | 0 | 120 | N | Withdrawn   |
| 504899 | M | Somalia Re A Level or I  | 0 | 180 | N | Withdrawn   |
| 504956 | M | Afar Regi HE Qualific    | 1 | 90  | Y | Fail        |
| 505047 | M | Addis Abak HE Qualific   | 0 | 60  | N | Fail        |
| 505153 | M | North Regi A Level or I  | 0 | 120 | N | Withdrawn   |
| 505410 | M | Tigrai Regi Lower Tha    | 0 | 60  | N | Pass        |
| 505501 | F | Sidamo Re Lower Tha      | 1 | 120 | N | Withdrawn   |
| 506288 | M | North Regi A Level or I  | 0 | 120 | N | Withdrawn   |
| 506289 | M | South Regi Lower Tha     | 1 | 60  | N | Fail        |
| 506309 | F | Addis Abak A Level or I  | 0 | 120 | N | Pass        |
| 506498 | M | Afar Regi A Level or I   | 1 | 60  | N | Withdrawn   |
| 506550 | M | Tigrai Regi A Level or I | 0 | 60  | N | Pass        |
| 506783 | M | Addis Abak Lower Tha     | 1 | 90  | N | Fail        |
| 507010 | M | North Regi A Level or I  | 0 | 60  | N | Pass        |
| 507084 | F | Amhara Re Lower Tha      | 1 | 60  | N | Fail        |
| 507941 | F | Sidamo Re A Level or I   | 0 | 60  | N | Distinction |
| 508059 | M | South Regi A Level or I  | 1 | 90  | N | Fail        |
| 508210 | M | Tigrai Regi HE Qualific  | 0 | 90  | N | Pass        |
| 508232 | M | South Wes Lower Tha      | 1 | 60  | N | Withdrawn   |
| 508274 | F | Sidamo Re A Level or I   | 1 | 120 | N | Distinction |
| 508295 | F | Addis Abak A Level or I  | 0 | 60  | Y | Fail        |
| 508326 | M | Sidamo Re Lower Tha      | 0 | 60  | N | Fail        |
| 508388 | M | Addis Abak A Level or I  | 0 | 60  | N | Pass        |
| 508469 | M | Afar Regi Lower Tha      | 0 | 120 | N | Withdrawn   |
| 508627 | M | Amhara Re Lower Tha      | 1 | 60  | N | Fail        |

|        |   |                          |   |     |   |           |
|--------|---|--------------------------|---|-----|---|-----------|
| 508630 | F | Addis Abat Lower Tha     | 0 | 60  | N | Fail      |
| 508713 | M | Amhara Re Lower Tha      | 0 | 120 | N | Fail      |
| 508804 | M | Addis Abat Lower Tha     | 0 | 60  | N | Pass      |
| 508942 | M | South Regi Lower Tha     | 0 | 180 | Y | Fail      |
| 509407 | M | South Wes Lower Tha      | 1 | 180 | N | Withdrawn |
| 509940 | F | Amhara Re HE Qualific    | 1 | 60  | N | Withdrawn |
| 510112 | M | Addis Abat HE Qualific   | 0 | 120 | N | Withdrawn |
| 510534 | M | South Wes A Level or I   | 0 | 60  | N | Pass      |
| 511432 | M | Afar Regioi A Level or I | 1 | 270 | N | Withdrawn |
| 512123 | M | Addis Abat Lower Tha     | 1 | 60  | N | Fail      |
| 512335 | M | South Wes A Level or I   | 2 | 120 | N | Withdrawn |
| 512725 | M | South Regi A Level or I  | 1 | 120 | N | Withdrawn |
| 512859 | M | South Regi A Level or I  | 1 | 90  | N | Fail      |
| 513228 | M | Amhara Re Lower Tha      | 1 | 90  | N | Pass      |
| 513796 | M | Addis Abat Lower Tha     | 0 | 120 | N | Withdrawn |
| 514558 | F | Addis Abat Lower Tha     | 1 | 120 | Y | Fail      |
| 514913 | M | Sidamo Re Lower Tha      | 1 | 120 | Y | Fail      |
| 515285 | M | Oromia Re A Level or I   | 0 | 60  | N | Pass      |
| 515536 | M | Afar Regioi A Level or I | 0 | 120 | Y | Fail      |
| 515574 | M | Oromia Re Lower Tha      | 1 | 60  | N | Fail      |
| 515833 | M | South Regi A Level or I  | 0 | 60  | N | Pass      |
| 515857 | M | Somalia Re Lower Tha     | 0 | 60  | N | Pass      |
| 515859 | M | Somalia Re Lower Tha     | 0 | 60  | N | Fail      |
| 515888 | M | Somalia Re Lower Tha     | 0 | 90  | N | Pass      |
| 516095 | F | Afar Regioi Lower Tha    | 0 | 60  | N | Pass      |
| 516620 | M | Oromia Re A Level or I   | 0 | 60  | N | Fail      |
| 516673 | M | South Regi Lower Tha     | 1 | 120 | N | Withdrawn |
| 516770 | M | South Regi Lower Tha     | 1 | 120 | N | Withdrawn |
| 517349 | M | Sidamo Re A Level or I   | 1 | 150 | N | Pass      |
| 517481 | M | South Wes Post Gradu     | 1 | 60  | N | Fail      |
| 517571 | M | South Wes A Level or I   | 1 | 60  | N | Withdrawn |
| 517731 | F | South Wes A Level or I   | 0 | 150 | N | Pass      |
| 518364 | M | South Regi A Level or I  | 0 | 60  | N | Fail      |
| 518544 | M | South Regi Lower Tha     | 1 | 120 | N | Pass      |
| 518930 | M | Amhara Re Lower Tha      | 1 | 60  | N | Fail      |
| 518937 | M | Somalia Re Lower Tha     | 0 | 60  | N | Pass      |
| 520061 | M | North Regi Lower Tha     | 1 | 90  | N | Fail      |
| 520249 | F | Afar Regioi A Level or I | 0 | 60  | N | Withdrawn |
| 521109 | M | South Regi Lower Tha     | 2 | 60  | N | Withdrawn |
| 521255 | M | Sidamo Re Lower Tha      | 0 | 120 | N | Withdrawn |
| 521329 | M | South Regi Lower Tha     | 1 | 60  | N | Pass      |
| 521788 | M | North Regi A Level or I  | 1 | 90  | N | Fail      |
| 522007 | M | Addis Abat Lower Tha     | 1 | 60  | N | Fail      |
| 522082 | F | Amhara Re A Level or I   | 0 | 120 | N | Withdrawn |
| 522257 | M | Sidamo Re Lower Tha      | 1 | 60  | N | Pass      |
| 522428 | M | South Wes Lower Tha      | 1 | 60  | N | Fail      |
| 522740 | M | Sidamo Re A Level or I   | 0 | 90  | N | Pass      |

|        |   |                                  |   |     |   |             |
|--------|---|----------------------------------|---|-----|---|-------------|
| 522862 | M | Tigray Region A Level or Higher  | 2 | 60  | N | Fail        |
| 522881 | M | Oromia Region A Level or Higher  | 1 | 60  | N | Fail        |
| 523599 | M | Tigray Region A Level or Higher  | 1 | 120 | N | Pass        |
| 523680 | M | Addis Ababa A Level or Higher    | 0 | 60  | N | Pass        |
| 523777 | M | North Region A Level or Higher   | 1 | 60  | N | Fail        |
| 523971 | M | Sidamo Region A Level or Higher  | 1 | 60  | N | Fail        |
| 524232 | M | Sidamo Region Lower Than A Level | 1 | 60  | N | Withdrawn   |
| 524379 | F | Sidamo Region Lower Than A Level | 0 | 210 | N | Withdrawn   |
| 524384 | M | Sidamo Region Lower Than A Level | 0 | 60  | N | Fail        |
| 524407 | M | Sidamo Region HE Qualification   | 0 | 60  | N | Pass        |
| 524845 | F | Afar Region A Level or Higher    | 0 | 150 | Y | Pass        |
| 524938 | F | Sidamo Region A Level or Higher  | 1 | 60  | N | Fail        |
| 524974 | M | Oromia Region Lower Than A Level | 0 | 60  | N | Pass        |
| 524996 | F | Amhara Region Lower Than A Level | 0 | 240 | N | Withdrawn   |
| 525596 | M | Afar Region Lower Than A Level   | 0 | 60  | N | Withdrawn   |
| 525694 | M | South Region A Level or Higher   | 1 | 60  | N | Withdrawn   |
| 525781 | M | Addis Ababa A Level or Higher    | 0 | 60  | N | Withdrawn   |
| 526601 | M | South Region Lower Than A Level  | 0 | 60  | N | Pass        |
| 526948 | F | Sidamo Region Lower Than A Level | 0 | 240 | N | Withdrawn   |
| 527148 | M | Amhara Region HE Qualification   | 0 | 150 | N | Pass        |
| 527494 | M | South Region Lower Than A Level  | 0 | 60  | N | Pass        |
| 527565 | M | Tigray Region Lower Than A Level | 0 | 120 | Y | Withdrawn   |
| 527619 | M | South West A Level or Higher     | 0 | 120 | Y | Withdrawn   |
| 527713 | M | Amhara Region Lower Than A Level | 0 | 60  | N | Distinction |
| 527775 | F | Afar Region HE Qualification     | 1 | 60  | N | Fail        |
| 528506 | M | South Region HE Qualification    | 0 | 60  | N | Pass        |
| 528559 | M | North Region No Formal Education | 1 | 90  | N | Pass        |
| 529197 | M | North Region A Level or Higher   | 1 | 120 | N | Pass        |
| 529201 | M | Afar Region HE Qualification     | 0 | 90  | N | Pass        |
| 529211 | M | Afar Region A Level or Higher    | 1 | 60  | N | Fail        |
| 529309 | M | Somalia Region A Level or Higher | 2 | 60  | N | Pass        |
| 529490 | M | Afar Region HE Qualification     | 0 | 60  | N | Withdrawn   |
| 529684 | F | Amhara Region Lower Than A Level | 0 | 90  | Y | Fail        |
| 529723 | M | South West A Level or Higher     | 0 | 60  | N | Pass        |
| 529862 | F | South Region A Level or Higher   | 1 | 60  | N | Distinction |
| 530043 | M | South Region A Level or Higher   | 0 | 60  | N | Pass        |
| 530159 | M | Addis Ababa A Level or Higher    | 1 | 60  | N | Pass        |
| 530852 | M | Tigray Region Lower Than A Level | 1 | 60  | N | Withdrawn   |
| 530940 | F | Sidamo Region Lower Than A Level | 0 | 90  | N | Pass        |
| 531344 | M | South Region Lower Than A Level  | 1 | 120 | N | Withdrawn   |
| 531953 | M | Sidamo Region A Level or Higher  | 0 | 90  | N | Fail        |
| 532121 | F | Amhara Region Lower Than A Level | 0 | 120 | N | Pass        |
| 532741 | M | Sidamo Region A Level or Higher  | 1 | 90  | N | Fail        |
| 532895 | M | South Region Lower Than A Level  | 0 | 60  | N | Withdrawn   |
| 533523 | M | Somalia Region A Level or Higher | 0 | 90  | N | Pass        |
| 533975 | M | South West A Level or Higher     | 0 | 60  | N | Pass        |
| 535131 | M | Sidamo Region A Level or Higher  | 1 | 60  | N | Pass        |

|        |   |                            |   |     |   |             |
|--------|---|----------------------------|---|-----|---|-------------|
| 535529 | M | Tigrai Region Lower Than   | 1 | 60  | N | Fail        |
| 535671 | F | Afar Region HE Qualific    | 0 | 60  | N | Withdrawn   |
| 536103 | M | Afar Region HE Qualific    | 1 | 90  | N | Fail        |
| 536331 | M | Sidamo Region A Level or   | 0 | 90  | N | Pass        |
| 536711 | M | Amhara Region Lower Than   | 0 | 120 | Y | Withdrawn   |
| 537028 | M | Afar Region Lower Than     | 1 | 75  | N | Fail        |
| 537133 | F | Oromia Region Lower Than   | 1 | 60  | Y | Fail        |
| 537328 | M | Tigrai Region A Level or   | 0 | 120 | N | Pass        |
| 537942 | F | Amhara Region A Level or   | 0 | 180 | N | Pass        |
| 539945 | F | South Region A Level or    | 0 | 120 | N | Withdrawn   |
| 540503 | M | Sidamo Region Lower Than   | 0 | 60  | N | Pass        |
| 540637 | M | Addis Ababa Lower Than     | 1 | 120 | N | Pass        |
| 540909 | M | South Region A Level or    | 0 | 120 | N | Withdrawn   |
| 541768 | M | Somalia Region A Level or  | 0 | 90  | N | Pass        |
| 541783 | M | Amhara Region A Level or   | 0 | 60  | N | Pass        |
| 542423 | M | South Region A Level or    | 0 | 60  | N | Withdrawn   |
| 542550 | M | North Region A Level or    | 1 | 120 | N | Withdrawn   |
| 543607 | M | Somalia Region HE Qualific | 0 | 60  | N | Pass        |
| 543763 | M | Somalia Region A Level or  | 0 | 60  | N | Pass        |
| 543953 | F | Oromia Region Lower Than   | 0 | 60  | N | Pass        |
| 544021 | M | South Region Lower Than    | 1 | 60  | N | Withdrawn   |
| 544090 | M | Oromia Region A Level or   | 0 | 120 | N | Distinction |
| 544092 | M | North Region A Level or    | 0 | 90  | N | Pass        |
| 544155 | M | Amhara Region Lower Than   | 0 | 120 | N | Fail        |
| 544207 | M | Somalia Region Lower Than  | 0 | 60  | N | Distinction |
| 544289 | M | North Region HE Qualific   | 1 | 90  | N | Pass        |
| 544745 | M | South Region A Level or    | 0 | 90  | N | Withdrawn   |
| 545119 | M | South Region Lower Than    | 1 | 150 | Y | Withdrawn   |
| 545916 | M | Somalia Region Lower Than  | 0 | 120 | N | Fail        |
| 545944 | M | Tigrai Region A Level or   | 1 | 180 | N | Withdrawn   |
| 546065 | M | South Region Lower Than    | 0 | 60  | N | Pass        |
| 546480 | M | Addis Ababa A Level or     | 0 | 60  | N | Pass        |
| 546547 | F | Afar Region Lower Than     | 0 | 90  | N | Withdrawn   |
| 546643 | M | Sidamo Region HE Qualific  | 0 | 90  | N | Fail        |
| 546934 | M | Sidamo Region Lower Than   | 0 | 60  | N | Pass        |
| 547154 | M | Sidamo Region A Level or   | 0 | 120 | N | Pass        |
| 547393 | M | Afar Region A Level or     | 0 | 60  | N | Fail        |
| 547442 | F | Amhara Region A Level or   | 0 | 90  | N | Withdrawn   |
| 547593 | M | Addis Ababa Lower Than     | 0 | 60  | N | Withdrawn   |
| 547773 | M | Addis Ababa Post Gradu     | 0 | 60  | N | Pass        |
| 548080 | M | Addis Ababa A Level or     | 0 | 60  | N | Withdrawn   |
| 548508 | M | South Region A Level or    | 0 | 60  | N | Pass        |
| 548547 | F | Afar Region A Level or     | 1 | 60  | N | Fail        |
| 548666 | M | South Region Lower Than    | 0 | 90  | N | Pass        |
| 548693 | M | South West Lower Than      | 0 | 60  | N | Withdrawn   |
| 548722 | F | Afar Region A Level or     | 1 | 90  | N | Pass        |
| 549300 | F | South West Lower Than      | 0 | 60  | Y | Distinction |

|        |   |                         |   |     |   |             |
|--------|---|-------------------------|---|-----|---|-------------|
| 549397 | M | South Wes A Level or    | 0 | 60  | N | Pass        |
| 549523 | F | South Wes A Level or    | 1 | 150 | Y | Withdrawn   |
| 549648 | M | Addis Abak A Level or   | 0 | 60  | N | Pass        |
| 550359 | M | Sidamo Re A Level or    | 0 | 120 | N | Withdrawn   |
| 550477 | M | North Regi Lower Tha    | 0 | 120 | N | Fail        |
| 550556 | F | Amhara Re Lower Tha     | 1 | 60  | N | Fail        |
| 551245 | F | North Regi HE Qualific  | 0 | 60  | N | Pass        |
| 551277 | M | South Wes A Level or    | 0 | 120 | N | Pass        |
| 551299 | M | South Regi HE Qualific  | 0 | 60  | N | Fail        |
| 551354 | F | North Regi A Level or   | 0 | 120 | N | Fail        |
| 551373 | M | South Regi Lower Tha    | 0 | 60  | N | Withdrawn   |
| 551399 | F | Amhara Re A Level or    | 0 | 120 | N | Pass        |
| 551500 | M | South Regi A Level or   | 0 | 120 | N | Withdrawn   |
| 551557 | M | Sidamo Re A Level or    | 0 | 120 | N | Pass        |
| 551745 | M | Oromia Re Lower Tha     | 0 | 120 | N | Fail        |
| 551812 | M | South Regi A Level or   | 0 | 120 | N | Pass        |
| 551823 | F | Somalia Re A Level or   | 0 | 120 | Y | Withdrawn   |
| 552104 | F | South Regi A Level or   | 0 | 60  | Y | Distinction |
| 553187 | M | Addis Abak Lower Tha    | 0 | 90  | N | Pass        |
| 553283 | M | Amhara Re A Level or    | 0 | 60  | N | Distinction |
| 553364 | M | Afar Regioi A Level or  | 1 | 120 | N | Pass        |
| 553427 | M | Amhara Re A Level or    | 0 | 60  | N | Pass        |
| 554257 | F | Afar Regioi HE Qualific | 0 | 150 | N | Pass        |
| 554276 | M | South Regi A Level or   | 0 | 120 | N | Fail        |
| 554470 | M | South Regi Lower Tha    | 0 | 90  | N | Pass        |
| 554586 | M | Sidamo Re A Level or    | 0 | 120 | N | Pass        |
| 554846 | M | South Wes A Level or    | 0 | 120 | N | Distinction |
| 555440 | M | Addis Abak A Level or   | 0 | 60  | N | Withdrawn   |
| 555498 | M | Addis Abak HE Qualific  | 0 | 60  | N | Pass        |
| 555691 | M | Afar Regioi Lower Tha   | 0 | 210 | N | Withdrawn   |
| 555786 | M | Tigrai Regi A Level or  | 1 | 90  | N | Fail        |
| 555855 | F | Oromia Re A Level or    | 0 | 60  | N | Pass        |
| 555895 | F | Addis Abak Lower Tha    | 0 | 90  | N | Withdrawn   |
| 556275 | M | Afar Regioi Lower Tha   | 0 | 60  | N | Withdrawn   |
| 556492 | M | South Regi A Level or   | 1 | 180 | N | Withdrawn   |
| 556639 | M | South Wes A Level or    | 0 | 120 | N | Pass        |
| 556646 | M | South Wes Lower Tha     | 0 | 60  | N | Pass        |
| 557012 | M | South Regi A Level or   | 0 | 60  | N | Distinction |
| 557020 | M | South Regi Lower Tha    | 0 | 90  | N | Pass        |
| 557040 | M | Amhara Re Lower Tha     | 0 | 60  | Y | Withdrawn   |
| 557044 | M | Afar Regioi HE Qualific | 0 | 60  | N | Pass        |
| 557054 | M | Amhara Re HE Qualific   | 0 | 90  | N | Distinction |
| 557232 | M | South Regi A Level or   | 0 | 60  | N | Withdrawn   |
| 557385 | M | Oromia Re A Level or    | 0 | 120 | N | Pass        |
| 557395 | M | South Wes A Level or    | 0 | 60  | N | Pass        |
| 557481 | M | Addis Abak A Level or   | 0 | 60  | N | Withdrawn   |
| 557545 | M | Somalia Re A Level or   | 0 | 60  | N | Pass        |

|        |   |                          |   |     |   |             |
|--------|---|--------------------------|---|-----|---|-------------|
| 557655 | M | Afar Region HE Qualific  | 0 | 60  | N | Pass        |
| 557661 | M | South Regi Lower Thar    | 0 | 120 | N | Pass        |
| 557735 | M | South Wes Lower Thar     | 1 | 120 | N | Pass        |
| 557766 | M | South Wes Lower Thar     | 0 | 120 | N | Fail        |
| 558090 | M | Sidamo Re Lower Thar     | 0 | 60  | N | Fail        |
| 558205 | M | Afar Region A Level or I | 0 | 60  | N | Withdrawn   |
| 558284 | M | South Wes Lower Thar     | 0 | 150 | Y | Withdrawn   |
| 558301 | M | North Regi Lower Thar    | 0 | 150 | N | Fail        |
| 558309 | M | Somalia Re Lower Thar    | 0 | 90  | N | Withdrawn   |
| 558345 | M | Tigrai Regi A Level or I | 0 | 60  | N | Pass        |
| 558484 | M | South Regi A Level or I  | 0 | 60  | N | Pass        |
| 558635 | F | North Regi A Level or I  | 1 | 60  | N | Pass        |
| 558893 | M | Sidamo Re A Level or I   | 0 | 60  | N | Distinction |
| 558909 | F | South Regi Lower Thar    | 1 | 90  | N | Withdrawn   |
| 558970 | M | Tigrai Regi A Level or I | 0 | 60  | N | Pass        |
| 559067 | M | Somalia Re Lower Thar    | 0 | 60  | Y | Withdrawn   |
| 559428 | F | Tigrai Regi A Level or I | 0 | 90  | N | Distinction |
| 559599 | F | Sidamo Re Lower Thar     | 0 | 120 | N | Withdrawn   |
| 559754 | M | Sidamo Re Lower Thar     | 1 | 90  | N | Pass        |
| 559813 | M | Tigrai Regi A Level or I | 0 | 120 | N | Pass        |
| 559863 | M | South Wes Lower Thar     | 0 | 60  | N | Pass        |
| 559902 | M | Tigrai Regi Lower Thar   | 1 | 60  | N | Fail        |
| 559979 | F | Addis Abak HE Qualific   | 0 | 90  | N | Pass        |
| 559999 | M | Somalia Re A Level or I  | 0 | 120 | Y | Withdrawn   |
| 560329 | F | Amhara Re A Level or I   | 0 | 60  | N | Pass        |
| 560401 | M | South Regi A Level or I  | 0 | 60  | N | Pass        |
| 560410 | M | Afar Region Lower Thar   | 1 | 60  | N | Pass        |
| 560496 | F | Oromia Re A Level or I   | 1 | 120 | N | Withdrawn   |
| 560592 | M | Afar Region A Level or I | 0 | 60  | N | Fail        |
| 560659 | M | Somalia Re Lower Thar    | 0 | 150 | N | Withdrawn   |
| 560670 | F | Oromia Re Lower Thar     | 0 | 90  | N | Withdrawn   |
| 560703 | M | Sidamo Re A Level or I   | 0 | 60  | N | Pass        |
| 560727 | F | Addis Abak A Level or I  | 0 | 120 | N | Pass        |
| 560772 | M | South Regi A Level or I  | 0 | 60  | N | Withdrawn   |
| 560934 | M | Somalia Re A Level or I  | 0 | 60  | N | Fail        |
| 560946 | M | Afar Region A Level or I | 0 | 90  | N | Fail        |
| 560949 | F | Amhara Re A Level or I   | 0 | 120 | N | Pass        |
| 561031 | M | South Wes A Level or I   | 0 | 60  | Y | Pass        |
| 561068 | M | Oromia Re Lower Thar     | 0 | 60  | N | Fail        |
| 561268 | M | South Regi A Level or I  | 0 | 60  | N | Distinction |
| 561386 | M | Amhara Re Lower Thar     | 0 | 60  | N | Distinction |
| 561542 | M | Somalia Re Lower Thar    | 0 | 120 | N | Pass        |
| 561714 | M | South Regi Lower Thar    | 0 | 120 | Y | Distinction |
| 561865 | M | Tigrai Regi HE Qualific  | 0 | 60  | N | Pass        |
| 561867 | F | Tigrai Regi A Level or I | 0 | 60  | N | Pass        |
| 561868 | F | Tigrai Regi A Level or I | 0 | 60  | N | Pass        |
| 561873 | F | Tigrai Regi A Level or I | 0 | 60  | N | Pass        |

|        |   |                            |   |     |   |             |
|--------|---|----------------------------|---|-----|---|-------------|
| 561874 | F | Tigray Region HE Qualific  | 0 | 60  | N | Pass        |
| 561878 | M | Tigray Region Lower Thar   | 0 | 60  | N | Fail        |
| 561879 | M | Tigray Region A Level or I | 0 | 60  | N | Pass        |
| 561880 | M | Tigray Region Lower Thar   | 0 | 60  | N | Withdrawn   |
| 561889 | M | Tigray Region A Level or I | 0 | 60  | N | Pass        |
| 561929 | F | Tigray Region Lower Thar   | 0 | 60  | N | Pass        |
| 561930 | M | South Region A Level or I  | 0 | 120 | N | Pass        |
| 561976 | M | Tigray Region HE Qualific  | 0 | 60  | N | Pass        |
| 562377 | F | Addis Ababa A Level or I   | 0 | 120 | Y | Pass        |
| 562428 | M | Oromia Region A Level or I | 0 | 120 | Y | Withdrawn   |
| 562448 | F | Somalia Region Lower Thar  | 0 | 90  | N | Fail        |
| 562460 | M | South Region Lower Thar    | 0 | 60  | N | Withdrawn   |
| 562763 | M | Amhara Region A Level or I | 0 | 300 | N | Fail        |
| 562920 | M | Afar Region HE Qualific    | 0 | 60  | N | Fail        |
| 563014 | F | Oromia Region Lower Thar   | 0 | 90  | N | Withdrawn   |
| 563019 | M | Sidamo Region Lower Thar   | 0 | 120 | N | Fail        |
| 563020 | M | Sidamo Region Lower Thar   | 0 | 120 | N | Withdrawn   |
| 563051 | M | South West A Level or I    | 0 | 60  | N | Pass        |
| 563196 | M | Somalia Region Lower Thar  | 0 | 120 | N | Withdrawn   |
| 563239 | M | Sidamo Region A Level or I | 0 | 60  | N | Withdrawn   |
| 563299 | M | South Region A Level or I  | 0 | 120 | N | Pass        |
| 563430 | F | Sidamo Region Lower Thar   | 0 | 120 | N | Withdrawn   |
| 563636 | M | South West Lower Thar      | 0 | 60  | N | Fail        |
| 563742 | M | Addis Ababa Lower Thar     | 0 | 60  | N | Withdrawn   |
| 563783 | M | South Region Lower Thar    | 0 | 60  | N | Pass        |
| 563787 | F | North Region A Level or I  | 0 | 120 | N | Distinction |
| 564119 | M | South Region Lower Thar    | 0 | 60  | N | Pass        |
| 564262 | M | Sidamo Region Lower Thar   | 0 | 180 | N | Pass        |
| 564437 | M | South West Lower Thar      | 0 | 90  | N | Fail        |
| 564702 | M | South Region A Level or I  | 0 | 90  | N | Pass        |
| 564770 | M | South West Lower Thar      | 0 | 150 | N | Withdrawn   |
| 564821 | M | North Region Lower Thar    | 0 | 120 | N | Withdrawn   |
| 564981 | F | South Region A Level or I  | 0 | 60  | N | Distinction |
| 565469 | M | Somalia Region Lower Thar  | 0 | 120 | N | Withdrawn   |
| 565587 | M | South Region A Level or I  | 0 | 60  | N | Pass        |
| 565608 | F | Amhara Region Lower Thar   | 0 | 60  | N | Withdrawn   |
| 565653 | M | Addis Ababa A Level or I   | 0 | 90  | N | Withdrawn   |
| 565698 | F | South Region Lower Thar    | 0 | 60  | N | Pass        |
| 565849 | M | Afar Region Lower Thar     | 0 | 60  | N | Pass        |
| 565977 | M | Amhara Region A Level or I | 0 | 60  | N | Withdrawn   |
| 565990 | M | Sidamo Region Lower Thar   | 0 | 60  | N | Pass        |
| 565997 | M | Sidamo Region Lower Thar   | 0 | 120 | N | Withdrawn   |
| 566009 | M | Sidamo Region A Level or I | 0 | 90  | N | Distinction |
| 566135 | M | Amhara Region A Level or I | 0 | 60  | N | Pass        |
| 566172 | M | Tigray Region A Level or I | 0 | 60  | N | Withdrawn   |
| 566270 | M | South Region Lower Thar    | 0 | 60  | N | Pass        |
| 566465 | M | Addis Ababa A Level or I   | 0 | 120 | N | Pass        |

|        |   |                         |   |     |   |             |
|--------|---|-------------------------|---|-----|---|-------------|
| 566675 | M | Oromia Re Lower Tha     | 0 | 60  | N | Withdrawn   |
| 566817 | F | Somalia Re Lower Tha    | 0 | 60  | N | Pass        |
| 566823 | M | Sidamo Re A Level or I  | 0 | 60  | N | Withdrawn   |
| 566863 | M | South Wes A Level or I  | 0 | 120 | N | Pass        |
| 566973 | F | North Regi A Level or I | 0 | 60  | N | Pass        |
| 567165 | F | Somalia Re Lower Tha    | 0 | 60  | N | Pass        |
| 567222 | M | Somalia Re Lower Tha    | 0 | 60  | N | Pass        |
| 567223 | M | Sidamo Re Lower Tha     | 0 | 120 | N | Fail        |
| 567312 | M | South Regi A Level or I | 0 | 60  | N | Pass        |
| 567676 | M | Tigrai Regi Lower Tha   | 0 | 90  | N | Fail        |
| 567880 | M | Afar Regio Lower Tha    | 0 | 90  | N | Fail        |
| 567888 | M | Oromia Re HE Qualific   | 0 | 60  | N | Distinction |
| 567901 | M | Sidamo Re Lower Tha     | 0 | 135 | N | Pass        |
| 568084 | M | Somalia Re A Level or I | 0 | 120 | N | Pass        |
| 568132 | M | North Regi A Level or I | 0 | 60  | N | Pass        |
| 568153 | M | Addis Abak A Level or I | 0 | 60  | N | Pass        |
| 568184 | M | South Wes Lower Tha     | 0 | 60  | N | Fail        |
| 568204 | M | Afar Regio A Level or I | 0 | 90  | N | Fail        |
| 568207 | M | South Regi A Level or I | 0 | 60  | Y | Pass        |
| 568234 | M | Amhara Re Lower Tha     | 0 | 90  | N | Pass        |
| 568333 | M | South Wes Lower Tha     | 0 | 120 | Y | Pass        |
| 568381 | M | Amhara Re A Level or I  | 0 | 60  | Y | Fail        |
| 568444 | M | Afar Regio Lower Tha    | 0 | 60  | N | Withdrawn   |
| 568450 | M | Oromia Re A Level or I  | 0 | 60  | N | Pass        |
| 568551 | F | South Regi A Level or I | 0 | 90  | N | Pass        |
| 568592 | M | Somalia Re Lower Tha    | 0 | 120 | N | Fail        |
| 568602 | M | South Regi A Level or I | 0 | 90  | Y | Withdrawn   |
| 568644 | M | Somalia Re A Level or I | 0 | 60  | N | Pass        |
| 568763 | M | Sidamo Re A Level or I  | 0 | 120 | N | Fail        |
| 568767 | M | South Wes Lower Tha     | 0 | 60  | N | Fail        |
| 568774 | M | South Regi A Level or I | 0 | 120 | N | Pass        |
| 568857 | F | North Regi Lower Tha    | 0 | 120 | Y | Withdrawn   |
| 568910 | M | South Regi HE Qualific  | 0 | 60  | N | Fail        |
| 568987 | F | South Regi A Level or I | 0 | 120 | N | Withdrawn   |
| 568998 | M | South Regi A Level or I | 0 | 120 | Y | Withdrawn   |
| 569016 | M | South Regi Lower Tha    | 0 | 60  | N | Pass        |
| 569070 | M | Addis Abak Lower Tha    | 0 | 60  | N | Withdrawn   |
| 569107 | M | Oromia Re Lower Tha     | 0 | 60  | N | Pass        |
| 569132 | M | Oromia Re Lower Tha     | 0 | 120 | N | Fail        |
| 569167 | M | Addis Abak HE Qualific  | 0 | 60  | N | Pass        |
| 569474 | M | Sidamo Re Lower Tha     | 0 | 60  | N | Pass        |
| 569507 | F | South Regi A Level or I | 0 | 60  | N | Pass        |
| 569566 | M | South Regi A Level or I | 0 | 60  | N | Pass        |
| 569609 | F | South Regi A Level or I | 0 | 120 | N | Pass        |
| 569625 | M | Afar Regio A Level or I | 0 | 60  | N | Pass        |
| 569712 | M | South Regi Lower Tha    | 0 | 120 | Y | Distinction |
| 569807 | M | Sidamo Re A Level or I  | 0 | 60  | N | Withdrawn   |



|        |   |                        |   |     |   |             |
|--------|---|------------------------|---|-----|---|-------------|
| 569994 | F | Sidamo Re Lower Than   | 0 | 120 | N | Fail        |
| 570004 | M | Addis Abak Lower Than  | 0 | 180 | Y | Withdrawn   |
| 570023 | M | South Regi No Formal   | 0 | 60  | N | Withdrawn   |
| 570061 | F | South Wes Lower Than   | 0 | 180 | Y | Pass        |
| 570213 | M | South Regi A Level or  | 0 | 60  | N | Fail        |
| 570280 | M | South Wes A Level or   | 0 | 60  | N | Withdrawn   |
| 570428 | M | Amhara Re A Level or   | 0 | 120 | N | Pass        |
| 570455 | M | Tigrai Regi Lower Than | 0 | 60  | N | Pass        |
| 570515 | M | South Wes Lower Than   | 0 | 60  | N | Fail        |
| 570517 | M | South Wes A Level or   | 0 | 75  | N | Pass        |
| 570550 | M | Somalia Re A Level or  | 0 | 120 | N | Fail        |
| 570689 | M | Somalia Re A Level or  | 0 | 60  | N | Withdrawn   |
| 570717 | M | Amhara Re Lower Than   | 0 | 120 | Y | Pass        |
| 570732 | M | Somalia Re Lower Than  | 0 | 60  | N | Distinction |
| 570807 | F | North Regi A Level or  | 0 | 90  | N | Distinction |
| 570878 | M | South Regi Lower Than  | 0 | 120 | N | Fail        |
| 570978 | F | South Regi A Level or  | 0 | 120 | N | Pass        |
| 571019 | M | South Regi Lower Than  | 0 | 60  | N | Distinction |
| 571022 | M | South Regi A Level or  | 0 | 60  | N | Pass        |
| 571044 | F | Amhara Re Lower Than   | 0 | 90  | N | Withdrawn   |
| 571079 | M | Oromia Re A Level or   | 0 | 60  | N | Withdrawn   |
| 571117 | M | Sidamo Re Lower Than   | 0 | 60  | N | Fail        |
| 571355 | M | South Wes A Level or   | 0 | 60  | N | Pass        |
| 571363 | M | Amhara Re A Level or   | 0 | 120 | N | Fail        |
| 571490 | M | Sidamo Re Lower Than   | 0 | 60  | N | Pass        |
| 571575 | F | Sidamo Re Lower Than   | 0 | 150 | N | Withdrawn   |
| 571612 | M | Tigrai Regi Lower Than | 0 | 120 | Y | Withdrawn   |
| 571622 | M | Amhara Re A Level or   | 0 | 60  | N | Pass        |
| 571630 | M | Sidamo Re A Level or   | 0 | 120 | N | Withdrawn   |
| 571638 | M | Afar Regi Lower Than   | 0 | 60  | N | Fail        |
| 571650 | M | Sidamo Re Lower Than   | 0 | 120 | N | Pass        |
| 571702 | M | Amhara Re Lower Than   | 0 | 90  | N | Withdrawn   |
| 571757 | M | South Regi A Level or  | 0 | 60  | N | Fail        |
| 571800 | M | South Regi Lower Than  | 0 | 60  | N | Pass        |
| 571802 | F | Amhara Re Lower Than   | 0 | 60  | N | Fail        |
| 571828 | M | South Wes Lower Than   | 0 | 60  | N | Pass        |
| 571831 | M | Amhara Re Lower Than   | 0 | 60  | N | Pass        |
| 571844 | M | Sidamo Re Lower Than   | 0 | 180 | N | Withdrawn   |
| 571859 | F | South Wes Lower Than   | 0 | 60  | N | Pass        |
| 571862 | M | North Regi A Level or  | 0 | 60  | N | Distinction |
| 571893 | M | Sidamo Re A Level or   | 0 | 90  | N | Pass        |
| 571926 | M | Amhara Re A Level or   | 0 | 90  | N | Pass        |
| 571927 | F | Sidamo Re Lower Than   | 0 | 60  | N | Fail        |
| 571935 | M | Sidamo Re A Level or   | 0 | 90  | N | Withdrawn   |
| 571973 | M | Sidamo Re Lower Than   | 0 | 60  | N | Fail        |
| 571994 | M | Amhara Re A Level or   | 0 | 60  | N | Withdrawn   |
| 572003 | M | North Regi A Level or  | 0 | 120 | N | Pass        |

|        |   |                          |   |     |   |             |
|--------|---|--------------------------|---|-----|---|-------------|
| 572011 | M | Amhara Re A Level or I   | 0 | 60  | N | Pass        |
| 572036 | M | Somalia Re Lower Tha     | 0 | 120 | N | Pass        |
| 572047 | M | Addis Abak Lower Tha     | 0 | 60  | N | Fail        |
| 572053 | M | Sidamo Re HE Qualific    | 0 | 120 | N | Distinction |
| 572071 | M | Somalia Re Lower Tha     | 0 | 60  | N | Withdrawn   |
| 572076 | M | Afar Regio Lower Tha     | 0 | 120 | N | Fail        |
| 572116 | M | Tigrai Regi A Level or I | 0 | 120 | N | Fail        |
| 572124 | M | Amhara Re A Level or I   | 0 | 120 | N | Pass        |
| 572125 | M | Addis Abak Lower Tha     | 0 | 120 | N | Pass        |
| 572128 | M | Addis Abak A Level or I  | 0 | 60  | N | Withdrawn   |
| 572179 | M | Afar Regio Lower Tha     | 0 | 90  | Y | Withdrawn   |
| 572199 | M | Sidamo Re Lower Tha      | 0 | 60  | N | Fail        |
| 572209 | M | South Wes Lower Tha      | 0 | 180 | Y | Withdrawn   |
| 572213 | F | Addis Abak HE Qualific   | 0 | 60  | N | Withdrawn   |
| 572250 | M | Addis Abak A Level or I  | 0 | 120 | N | Pass        |
| 572265 | M | Sidamo Re A Level or I   | 0 | 150 | N | Withdrawn   |
| 572270 | M | Amhara Re A Level or I   | 0 | 150 | N | Fail        |
| 572274 | F | Addis Abak A Level or I  | 0 | 120 | N | Pass        |
| 572304 | M | Addis Abak A Level or I  | 0 | 60  | N | Fail        |
| 572346 | M | South Regi A Level or I  | 0 | 90  | N | Fail        |
| 572397 | M | Sidamo Re Lower Tha      | 0 | 60  | N | Pass        |
| 572410 | M | Tigrai Regi HE Qualific  | 0 | 60  | N | Pass        |
| 572493 | F | Sidamo Re Lower Tha      | 0 | 120 | N | Fail        |
| 572505 | M | Amhara Re Lower Tha      | 0 | 60  | N | Pass        |
| 572532 | M | South Wes Lower Tha      | 0 | 60  | N | Withdrawn   |
| 572554 | M | Oromia Re Lower Tha      | 0 | 60  | N | Withdrawn   |
| 572560 | M | Addis Abak Lower Tha     | 0 | 60  | N | Pass        |
| 572584 | M | Sidamo Re Lower Tha      | 0 | 60  | N | Pass        |
| 572588 | M | Oromia Re A Level or I   | 0 | 60  | N | Distinction |
| 572589 | F | Somalia Re Lower Tha     | 0 | 60  | N | Withdrawn   |
| 572634 | M | South Regi A Level or I  | 0 | 120 | N | Pass        |
| 572702 | F | Addis Abak Lower Tha     | 0 | 120 | N | Pass        |
| 572718 | M | Addis Abak Lower Tha     | 0 | 120 | Y | Fail        |
| 572769 | F | Amhara Re Lower Tha      | 0 | 120 | N | Pass        |
| 572783 | M | Amhara Re HE Qualific    | 0 | 60  | N | Pass        |
| 572816 | M | Somalia Re Lower Tha     | 0 | 120 | N | Withdrawn   |
| 572845 | M | Sidamo Re A Level or I   | 0 | 60  | N | Distinction |
| 572860 | F | Sidamo Re No Formal      | 0 | 120 | N | Pass        |
| 572871 | M | Amhara Re A Level or I   | 0 | 90  | N | Withdrawn   |
| 572910 | M | Amhara Re Lower Tha      | 0 | 60  | N | Withdrawn   |
| 572981 | M | Tigrai Regi A Level or I | 0 | 90  | N | Withdrawn   |
| 573007 | M | South Wes Lower Tha      | 0 | 90  | N | Withdrawn   |
| 573093 | M | Oromia Re A Level or I   | 0 | 90  | N | Pass        |
| 573150 | M | Addis Abak Lower Tha     | 0 | 60  | N | Fail        |
| 573152 | M | Sidamo Re A Level or I   | 0 | 60  | N | Pass        |
| 573166 | M | South Regi A Level or I  | 0 | 90  | N | Pass        |
| 573173 | M | South Regi Lower Tha     | 0 | 60  | N | Pass        |

|        |   |                          |   |     |   |             |
|--------|---|--------------------------|---|-----|---|-------------|
| 573199 | M | Sidamo Re A Level or I   | 0 | 120 | N | Fail        |
| 573224 | M | South Wes A Level or I   | 0 | 120 | N | Distinction |
| 573245 | M | South Wes Lower Than     | 0 | 60  | N | Fail        |
| 573280 | M | Somalia Re Lower Than    | 0 | 60  | N | Fail        |
| 573291 | M | South Regi A Level or I  | 0 | 60  | N | Withdrawn   |
| 573317 | M | Afar Regioi A Level or I | 0 | 60  | N | Fail        |
| 573434 | M | Sidamo Re Lower Than     | 0 | 60  | N | Pass        |
| 573467 | M | Tigrai Regi A Level or I | 0 | 90  | N | Pass        |
| 573481 | M | South Wes A Level or I   | 0 | 120 | N | Withdrawn   |
| 573639 | M | South Regi A Level or I  | 0 | 60  | N | Pass        |
| 573674 | M | South Wes A Level or I   | 0 | 60  | N | Fail        |
| 573678 | M | South Wes A Level or I   | 0 | 70  | Y | Pass        |
| 573696 | M | Sidamo Re A Level or I   | 0 | 90  | N | Fail        |
| 573697 | F | South Regi HE Qualific   | 0 | 180 | N | Withdrawn   |
| 573704 | M | Tigrai Regi Lower Than   | 0 | 90  | N | Pass        |
| 573766 | M | Sidamo Re HE Qualific    | 0 | 60  | N | Fail        |
| 573860 | M | South Wes Lower Than     | 0 | 60  | N | Fail        |
| 573864 | M | South Wes A Level or I   | 0 | 240 | N | Pass        |
| 573900 | M | South Wes Lower Than     | 0 | 90  | N | Pass        |
| 573901 | M | South Wes HE Qualific    | 0 | 60  | N | Fail        |
| 573922 | M | North Regi A Level or I  | 0 | 90  | N | Withdrawn   |
| 573951 | M | Addis Abak Lower Than    | 0 | 90  | N | Pass        |
| 574056 | M | South Regi Lower Than    | 0 | 60  | N | Fail        |
| 574070 | F | Oromia Re Lower Than     | 0 | 60  | N | Pass        |
| 574078 | M | Sidamo Re A Level or I   | 0 | 60  | N | Pass        |
| 574207 | M | Sidamo Re Lower Than     | 0 | 120 | N | Pass        |
| 574232 | M | Sidamo Re A Level or I   | 0 | 240 | N | Withdrawn   |
| 574237 | M | South Wes A Level or I   | 0 | 90  | Y | Withdrawn   |
| 574245 | M | South Regi Lower Than    | 0 | 150 | N | Fail        |
| 574282 | M | Sidamo Re A Level or I   | 0 | 90  | N | Withdrawn   |
| 574283 | M | South Regi A Level or I  | 0 | 120 | N | Pass        |
| 574305 | F | South Regi A Level or I  | 0 | 60  | N | Withdrawn   |
| 574315 | M | Amhara Re A Level or I   | 0 | 120 | N | Distinction |
| 574382 | M | Amhara Re A Level or I   | 0 | 60  | N | Fail        |
| 574418 | M | South Wes Lower Than     | 0 | 60  | N | Pass        |
| 574446 | M | South Regi Lower Than    | 0 | 120 | N | Distinction |
| 574470 | M | South Regi A Level or I  | 0 | 60  | N | Withdrawn   |
| 574534 | M | Somalia Re Lower Than    | 0 | 120 | N | Pass        |
| 574551 | M | Afar Regioi A Level or I | 0 | 90  | N | Pass        |
| 574570 | M | Sidamo Re A Level or I   | 0 | 60  | N | Pass        |
| 574664 | M | Addis Abak Lower Than    | 0 | 120 | N | Fail        |
| 574681 | M | Addis Abak Lower Than    | 0 | 60  | N | Pass        |
| 574683 | M | Sidamo Re A Level or I   | 0 | 120 | N | Fail        |
| 574695 | M | Afar Regioi Lower Than   | 0 | 60  | N | Withdrawn   |
| 574722 | M | Sidamo Re Lower Than     | 0 | 60  | N | Pass        |
| 574732 | F | Tigrai Regi Lower Than   | 0 | 60  | N | Pass        |
| 574735 | M | Sidamo Re Lower Than     | 0 | 60  | N | Withdrawn   |

|        |   |                          |   |     |   |             |
|--------|---|--------------------------|---|-----|---|-------------|
| 574737 | M | Addis Abat A Level or I  | 0 | 120 | N | Withdrawn   |
| 574815 | M | South Regi Lower Tha     | 0 | 180 | N | Withdrawn   |
| 574820 | M | Addis Abat A Level or I  | 0 | 60  | N | Withdrawn   |
| 574845 | M | South Wes Lower Tha      | 0 | 90  | N | Pass        |
| 574856 | M | Tigrai Regi Lower Tha    | 0 | 60  | N | Fail        |
| 574871 | M | Oromia Re A Level or I   | 0 | 60  | N | Withdrawn   |
| 574874 | M | Sidamo Re A Level or I   | 0 | 120 | N | Distinction |
| 574919 | F | Tigrai Regi Lower Tha    | 0 | 150 | N | Withdrawn   |
| 574950 | M | Sidamo Re A Level or I   | 0 | 60  | N | Withdrawn   |
| 574955 | M | North Regi Lower Tha     | 0 | 120 | N | Fail        |
| 575003 | M | Afar Regio Lower Tha     | 0 | 90  | N | Withdrawn   |
| 575019 | F | North Regi Lower Tha     | 0 | 120 | N | Withdrawn   |
| 575039 | M | South Regi A Level or I  | 0 | 60  | N | Pass        |
| 575186 | M | Somalia Re A Level or I  | 0 | 120 | N | Pass        |
| 575265 | M | Sidamo Re Lower Tha      | 0 | 60  | N | Pass        |
| 575282 | F | Tigrai Regi A Level or I | 0 | 120 | N | Fail        |
| 575372 | M | Sidamo Re A Level or I   | 0 | 120 | N | Pass        |
| 575459 | M | Sidamo Re Lower Tha      | 0 | 240 | Y | Withdrawn   |
| 575476 | M | Amhara Re Lower Tha      | 0 | 60  | N | Withdrawn   |
| 575512 | M | North Regi A Level or I  | 0 | 120 | N | Pass        |
| 575533 | M | Sidamo Re A Level or I   | 0 | 60  | N | Withdrawn   |
| 575655 | M | Sidamo Re Lower Tha      | 0 | 120 | N | Withdrawn   |
| 575678 | M | Afar Regio A Level or I  | 0 | 60  | N | Pass        |
| 575797 | M | Tigrai Regi Lower Tha    | 0 | 120 | N | Pass        |
| 575822 | M | Sidamo Re Lower Tha      | 0 | 120 | N | Fail        |
| 575875 | F | Afar Regio A Level or I  | 0 | 150 | N | Withdrawn   |
| 575919 | M | Tigrai Regi Lower Tha    | 0 | 60  | N | Fail        |
| 575941 | M | Amhara Re A Level or I   | 0 | 90  | N | Withdrawn   |
| 575956 | M | Afar Regio Lower Tha     | 0 | 60  | N | Pass        |
| 576032 | M | Afar Regio Lower Tha     | 0 | 60  | N | Fail        |
| 576088 | F | South Regi Lower Tha     | 0 | 60  | N | Fail        |
| 576097 | M | North Regi A Level or I  | 0 | 60  | N | Pass        |
| 576107 | M | South Regi A Level or I  | 0 | 120 | N | Pass        |
| 576205 | F | Sidamo Re Lower Tha      | 0 | 60  | N | Pass        |
| 576229 | M | Somalia Re Lower Tha     | 0 | 60  | N | Pass        |
| 576281 | M | Somalia Re Lower Tha     | 0 | 90  | N | Fail        |
| 576390 | M | Sidamo Re Lower Tha      | 0 | 60  | N | Fail        |
| 576399 | M | Sidamo Re Lower Tha      | 0 | 60  | N | Pass        |
| 576417 | M | Tigrai Regi Lower Tha    | 0 | 60  | N | Fail        |
| 576423 | M | Sidamo Re A Level or I   | 0 | 240 | N | Fail        |
| 576431 | M | Sidamo Re A Level or I   | 0 | 90  | N | Pass        |
| 576433 | M | Addis Abak A Level or I  | 0 | 60  | N | Distinction |
| 576466 | M | Afar Regio A Level or I  | 0 | 90  | Y | Withdrawn   |
| 576512 | M | South Regi A Level or I  | 0 | 90  | N | Fail        |
| 576518 | M | Sidamo Re A Level or I   | 0 | 60  | N | Pass        |
| 576568 | M | South Wes A Level or I   | 0 | 60  | N | Pass        |
| 576670 | M | Somalia Re Lower Tha     | 0 | 90  | N | Withdrawn   |

|        |   |                          |   |     |   |             |
|--------|---|--------------------------|---|-----|---|-------------|
| 576672 | M | Somalia Re A Level or I  | 0 | 60  | N | Pass        |
| 576681 | M | North Regi A Level or I  | 0 | 60  | Y | Withdrawn   |
| 576704 | M | North Regi Lower Tha     | 0 | 60  | N | Pass        |
| 576765 | M | South Regi HE Qualific   | 0 | 60  | N | Fail        |
| 576780 | M | Addis Abak A Level or I  | 0 | 120 | N | Distinction |
| 576789 | M | South Wes Lower Tha      | 0 | 60  | N | Pass        |
| 576791 | M | North Regi HE Qualific   | 0 | 120 | N | Distinction |
| 576813 | M | Sidamo Re Lower Tha      | 0 | 60  | N | Pass        |
| 576856 | M | Somalia Re Lower Tha     | 0 | 60  | N | Fail        |
| 576888 | M | South Wes Lower Tha      | 0 | 120 | N | Pass        |
| 576921 | F | Somalia Re A Level or I  | 0 | 60  | N | Distinction |
| 576943 | F | South Regi A Level or I  | 0 | 60  | N | Withdrawn   |
| 576972 | M | South Regi A Level or I  | 0 | 120 | N | Withdrawn   |
| 577042 | M | Amhara Re A Level or I   | 0 | 60  | N | Pass        |
| 577149 | M | Tigrai Regi A Level or I | 0 | 60  | N | Pass        |
| 577222 | F | Afar Regioi A Level or I | 0 | 90  | N | Distinction |
| 577371 | M | Amhara Re Lower Tha      | 0 | 60  | N | Withdrawn   |
| 577389 | M | North Regi Lower Tha     | 0 | 60  | N | Fail        |
| 577396 | M | South Regi Lower Tha     | 0 | 60  | N | Withdrawn   |
| 577404 | F | Sidamo Re A Level or I   | 0 | 120 | N | Distinction |
| 577454 | M | Sidamo Re A Level or I   | 0 | 90  | N | Withdrawn   |
| 577476 | M | South Wes A Level or I   | 0 | 90  | N | Pass        |
| 577533 | M | Somalia Re A Level or I  | 0 | 120 | N | Withdrawn   |
| 577605 | M | Afar Regioi A Level or I | 0 | 120 | N | Pass        |
| 577607 | M | South Wes Lower Tha      | 0 | 90  | N | Fail        |
| 577640 | M | Addis Abak Lower Tha     | 0 | 60  | Y | Withdrawn   |
| 577673 | M | Afar Regioi HE Qualific  | 0 | 120 | Y | Withdrawn   |
| 577688 | M | South Regi Lower Tha     | 0 | 90  | N | Withdrawn   |
| 577721 | M | South Wes Lower Tha      | 0 | 150 | N | Withdrawn   |
| 577763 | M | Afar Regioi Lower Tha    | 0 | 60  | N | Pass        |
| 577764 | F | South Regi Lower Tha     | 0 | 120 | N | Distinction |
| 577797 | M | South Wes Lower Tha      | 0 | 60  | N | Withdrawn   |
| 577867 | M | Amhara Re Lower Tha      | 0 | 60  | N | Pass        |
| 577922 | M | South Regi A Level or I  | 0 | 60  | N | Distinction |
| 577959 | M | South Wes A Level or I   | 0 | 120 | N | Distinction |
| 577999 | F | Sidamo Re Lower Tha      | 0 | 60  | N | Distinction |
| 578050 | M | South Wes A Level or I   | 0 | 90  | N | Pass        |
| 578152 | M | Tigrai Regi Lower Tha    | 0 | 90  | N | Withdrawn   |
| 578199 | M | Afar Regioi A Level or I | 0 | 90  | N | Pass        |
| 578208 | M | Amhara Re Lower Tha      | 0 | 75  | N | Withdrawn   |
| 578258 | M | South Wes Lower Tha      | 0 | 180 | N | Withdrawn   |
| 578259 | M | Somalia Re A Level or I  | 0 | 120 | N | Withdrawn   |
| 578276 | F | Amhara Re A Level or I   | 0 | 120 | N | Fail        |
| 578281 | M | Somalia Re A Level or I  | 0 | 150 | N | Distinction |
| 578492 | M | Addis Abak Lower Tha     | 0 | 90  | N | Pass        |
| 578497 | M | South Regi A Level or I  | 0 | 60  | N | Distinction |
| 578519 | M | Addis Abak A Level or I  | 0 | 180 | N | Pass        |

|        |   |                         |   |     |   |             |
|--------|---|-------------------------|---|-----|---|-------------|
| 578547 | M | South Wes Lower Thai    | 0 | 60  | N | Fail        |
| 578550 | M | Addis Abak Lower Thai   | 0 | 90  | N | Withdrawn   |
| 578561 | M | Tigrai Regi Lower Thai  | 0 | 60  | N | Fail        |
| 578599 | M | Amhara Re Lower Thai    | 0 | 60  | N | Withdrawn   |
| 578649 | M | Sidamo Re Lower Thai    | 0 | 60  | N | Withdrawn   |
| 578744 | M | North Regi A Level or I | 0 | 120 | N | Pass        |
| 579038 | M | Sidamo Re Lower Thai    | 0 | 120 | N | Pass        |
| 579064 | M | South Regi Lower Thai   | 0 | 60  | N | Withdrawn   |
| 579069 | M | Sidamo Re Lower Thai    | 0 | 120 | N | Withdrawn   |
| 579115 | M | Tigrai Regi Lower Thai  | 0 | 60  | N | Fail        |
| 579176 | F | Afar Regi HE Qualific   | 0 | 75  | N | Pass        |
| 579257 | M | Oromia Re A Level or I  | 0 | 60  | N | Pass        |
| 579278 | M | South Wes Lower Thai    | 0 | 60  | N | Pass        |
| 579307 | M | North Regi Lower Thai   | 0 | 60  | N | Withdrawn   |
| 579354 | F | Afar Regi Lower Thai    | 0 | 60  | N | Withdrawn   |
| 579361 | M | Somalia Re Lower Thai   | 0 | 120 | N | Withdrawn   |
| 579415 | M | South Wes Lower Thai    | 0 | 120 | N | Fail        |
| 579416 | M | Somalia Re Lower Thai   | 0 | 60  | N | Fail        |
| 579482 | M | Afar Regi A Level or I  | 0 | 60  | N | Fail        |
| 579506 | M | North Regi A Level or I | 0 | 60  | N | Pass        |
| 579526 | M | Sidamo Re Lower Thai    | 0 | 60  | N | Pass        |
| 579557 | M | South Wes A Level or I  | 0 | 60  | N | Distinction |
| 579685 | M | South Regi No Formal    | 0 | 60  | N | Fail        |
| 579737 | M | North Regi A Level or I | 0 | 60  | N | Pass        |
| 580317 | M | South Regi A Level or I | 0 | 120 | N | Distinction |
| 580342 | M | Somalia Re Lower Thai   | 0 | 60  | N | Pass        |
| 580358 | M | Sidamo Re HE Qualific   | 0 | 210 | N | Withdrawn   |
| 580380 | F | Addis Abak A Level or I | 0 | 60  | N | Pass        |
| 580477 | M | Addis Abak Lower Thai   | 0 | 120 | Y | Withdrawn   |
| 580484 | M | Afar Regi HE Qualific   | 0 | 135 | N | Fail        |
| 580533 | M | Sidamo Re Lower Thai    | 0 | 120 | Y | Withdrawn   |
| 580555 | M | South Wes A Level or I  | 0 | 120 | N | Pass        |
| 580657 | M | Addis Abak A Level or I | 0 | 60  | N | Pass        |
| 580658 | M | Amhara Re Lower Thai    | 0 | 60  | Y | Withdrawn   |
| 580702 | M | Sidamo Re HE Qualific   | 0 | 120 | N | Pass        |
| 580709 | M | South Regi A Level or I | 0 | 60  | N | Pass        |
| 580743 | M | Amhara Re HE Qualific   | 0 | 60  | N | Pass        |
| 580755 | F | Somalia Re A Level or I | 0 | 60  | N | Withdrawn   |
| 580771 | M | South Wes Lower Thai    | 0 | 120 | N | Withdrawn   |
| 580779 | F | Somalia Re A Level or I | 0 | 90  | N | Pass        |
| 580824 | M | Sidamo Re Lower Thai    | 0 | 150 | N | Withdrawn   |
| 580842 | F | South Regi Lower Thai   | 0 | 90  | N | Distinction |
| 580867 | M | Somalia Re Lower Thai   | 0 | 60  | N | Pass        |
| 581034 | F | South Regi Lower Thai   | 0 | 90  | N | Pass        |
| 581135 | M | Oromia Re A Level or I  | 0 | 60  | N | Pass        |
| 581219 | M | Amhara Re Lower Thai    | 0 | 60  | N | Withdrawn   |
| 581253 | M | South Regi Lower Thai   | 0 | 60  | N | Fail        |

|        |   |                          |   |     |   |             |
|--------|---|--------------------------|---|-----|---|-------------|
| 581261 | M | South Regi No Formal     | 0 | 60  | N | Pass        |
| 581307 | M | South Wes Lower Tha      | 0 | 90  | N | Fail        |
| 581332 | M | South Regi Lower Tha     | 0 | 90  | N | Pass        |
| 581341 | M | Somalia Re A Level or I  | 0 | 150 | N | Withdrawn   |
| 581342 | M | Addis Abak Lower Tha     | 0 | 120 | N | Fail        |
| 581410 | M | Oromia Re A Level or I   | 0 | 60  | Y | Pass        |
| 581412 | M | Tigrai Regi Lower Tha    | 0 | 150 | N | Fail        |
| 581486 | M | North Regi Lower Tha     | 0 | 90  | N | Pass        |
| 581490 | F | Sidamo Re Lower Tha      | 0 | 120 | N | Pass        |
| 581523 | M | Oromia Re A Level or I   | 0 | 150 | N | Pass        |
| 581532 | M | South Regi Lower Tha     | 0 | 120 | N | Pass        |
| 581563 | M | North Regi A Level or I  | 0 | 120 | N | Withdrawn   |
| 581574 | M | Oromia Re Lower Tha      | 0 | 60  | N | Pass        |
| 581614 | M | Addis Abak A Level or I  | 0 | 120 | N | Pass        |
| 581616 | M | Sidamo Re Lower Tha      | 0 | 60  | N | Fail        |
| 581656 | M | South Wes A Level or I   | 0 | 60  | Y | Pass        |
| 581700 | M | Oromia Re A Level or I   | 0 | 90  | N | Fail        |
| 581716 | F | South Wes Lower Tha      | 0 | 180 | N | Withdrawn   |
| 581769 | M | Sidamo Re Lower Tha      | 0 | 60  | N | Pass        |
| 581770 | M | Addis Abak A Level or I  | 0 | 60  | N | Pass        |
| 581787 | M | Addis Abak A Level or I  | 0 | 120 | N | Pass        |
| 581796 | M | Afar Regio HE Qualific   | 0 | 60  | N | Pass        |
| 581810 | M | Oromia Re A Level or I   | 0 | 60  | N | Pass        |
| 581836 | M | South Wes A Level or I   | 0 | 150 | N | Distinction |
| 581838 | M | South Regi A Level or I  | 0 | 90  | N | Pass        |
| 581897 | M | Addis Abak A Level or I  | 0 | 60  | N | Withdrawn   |
| 582003 | M | Amhara Re Lower Tha      | 0 | 120 | N | Withdrawn   |
| 582063 | M | Addis Abak Lower Tha     | 0 | 90  | N | Pass        |
| 582080 | M | Oromia Re Lower Tha      | 0 | 60  | N | Fail        |
| 582108 | M | Sidamo Re A Level or I   | 0 | 90  | N | Pass        |
| 582125 | M | Afar Regio A Level or I  | 0 | 60  | N | Pass        |
| 582154 | M | Oromia Re A Level or I   | 0 | 90  | N | Withdrawn   |
| 582181 | M | Sidamo Re A Level or I   | 0 | 120 | N | Withdrawn   |
| 582235 | M | North Regi A Level or I  | 0 | 60  | N | Pass        |
| 582251 | M | Somalia Re Lower Tha     | 0 | 60  | N | Withdrawn   |
| 582275 | M | Afar Regio HE Qualific   | 0 | 60  | N | Fail        |
| 582282 | M | Afar Regio Lower Tha     | 0 | 85  | Y | Withdrawn   |
| 582311 | M | South Regi Lower Tha     | 0 | 60  | N | Fail        |
| 582364 | M | Amhara Re Lower Tha      | 0 | 120 | N | Pass        |
| 582392 | M | Tigrai Regi A Level or I | 0 | 60  | N | Pass        |
| 582494 | M | South Regi Lower Tha     | 0 | 60  | N | Pass        |
| 582510 | M | Somalia Re A Level or I  | 0 | 120 | N | Pass        |
| 582562 | M | Afar Regio HE Qualific   | 0 | 60  | N | Pass        |
| 582629 | M | Tigrai Regi HE Qualific  | 0 | 180 | N | Withdrawn   |
| 582665 | M | Amhara Re Lower Tha      | 0 | 60  | N | Withdrawn   |
| 582677 | M | South Wes Lower Tha      | 0 | 210 | N | Pass        |
| 582679 | F | Afar Regio HE Qualific   | 0 | 90  | N | Withdrawn   |

|        |   |                         |   |     |   |             |
|--------|---|-------------------------|---|-----|---|-------------|
| 582690 | M | Sidamo Re Lower Tha     | 0 | 90  | Y | Withdrawn   |
| 582705 | M | Sidamo Re A Level or I  | 0 | 60  | N | Pass        |
| 582790 | M | Oromia Re A Level or I  | 0 | 60  | N | Pass        |
| 582842 | M | South Wes A Level or I  | 0 | 120 | Y | Withdrawn   |
| 582950 | M | Afar Regio HE Qualific  | 0 | 90  | N | Distinction |
| 582992 | M | Afar Regio Lower Tha    | 0 | 60  | N | Withdrawn   |
| 583033 | M | Oromia Re HE Qualific   | 0 | 60  | N | Withdrawn   |
| 583051 | M | Somalia Re Lower Tha    | 0 | 180 | N | Withdrawn   |
| 583070 | F | Addis Abak Lower Tha    | 0 | 90  | N | Fail        |
| 583081 | M | North Regi A Level or I | 0 | 120 | N | Withdrawn   |
| 583121 | M | Afar Regio Post Gradu   | 0 | 60  | N | Fail        |
| 583128 | M | South Regi Lower Tha    | 0 | 60  | Y | Withdrawn   |
| 583131 | M | South Wes HE Qualific   | 0 | 120 | N | Pass        |
| 583149 | M | Sidamo Re A Level or I  | 0 | 60  | N | Fail        |
| 583202 | F | South Regi Lower Tha    | 0 | 90  | N | Pass        |
| 583232 | M | South Regi A Level or I | 0 | 60  | N | Pass        |
| 583236 | M | South Wes HE Qualific   | 0 | 60  | N | Fail        |
| 583286 | F | Addis Abak Lower Tha    | 0 | 120 | N | Pass        |
| 583381 | M | North Regi A Level or I | 0 | 60  | N | Pass        |
| 583526 | M | Amhara Re Lower Tha     | 0 | 60  | N | Pass        |
| 583591 | F | Sidamo Re Lower Tha     | 0 | 60  | N | Withdrawn   |
| 583599 | M | Amhara Re Lower Tha     | 0 | 60  | N | Fail        |
| 583741 | M | Afar Regio A Level or I | 0 | 60  | N | Pass        |
| 583824 | M | South Regi Lower Tha    | 0 | 60  | N | Pass        |
| 583826 | M | Sidamo Re Lower Tha     | 0 | 60  | N | Withdrawn   |
| 583840 | M | Sidamo Re A Level or I  | 0 | 120 | N | Withdrawn   |
| 583867 | M | Somalia Re Lower Tha    | 0 | 150 | N | Pass        |
| 583966 | F | Oromia Re A Level or I  | 0 | 90  | Y | Fail        |
| 583993 | M | South Regi A Level or I | 0 | 120 | Y | Fail        |
| 584040 | F | Somalia Re Lower Tha    | 0 | 90  | N | Fail        |
| 584078 | F | Addis Abak Lower Tha    | 0 | 60  | N | Fail        |
| 584111 | M | South Wes HE Qualific   | 0 | 90  | N | Pass        |
| 584210 | M | South Wes Lower Tha     | 0 | 60  | N | Fail        |
| 584214 | M | Somalia Re A Level or I | 0 | 60  | N | Distinction |
| 584225 | F | Tigrai Regi Lower Tha   | 0 | 60  | N | Fail        |
| 584362 | M | South Regi A Level or I | 0 | 120 | N | Withdrawn   |
| 584446 | F | South Wes HE Qualific   | 0 | 120 | N | Pass        |
| 584468 | F | Amhara Re A Level or I  | 0 | 120 | N | Pass        |
| 584546 | M | Sidamo Re Lower Tha     | 0 | 90  | N | Pass        |
| 584550 | F | Sidamo Re Lower Tha     | 0 | 90  | N | Pass        |
| 584594 | M | Oromia Re A Level or I  | 0 | 90  | N | Fail        |
| 584601 | M | South Wes Lower Tha     | 0 | 90  | N | Pass        |
| 584673 | M | Sidamo Re A Level or I  | 0 | 120 | N | Withdrawn   |
| 584687 | M | South Wes A Level or I  | 0 | 60  | N | Fail        |
| 584749 | F | South Regi Lower Tha    | 0 | 180 | N | Withdrawn   |
| 584771 | M | Afar Regio HE Qualific  | 0 | 90  | N | Pass        |
| 584792 | M | South Wes Lower Tha     | 0 | 60  | N | Withdrawn   |



|        |   |                          |   |     |   |             |
|--------|---|--------------------------|---|-----|---|-------------|
| 584806 | M | South Regi HE Qualific   | 0 | 120 | N | Fail        |
| 585033 | M | Tigrai Regi Lower Tha    | 0 | 60  | N | Pass        |
| 585050 | M | Sidamo Re A Level or I   | 0 | 60  | N | Withdrawn   |
| 585093 | M | North Regi Post Gradu    | 0 | 90  | N | Distinction |
| 585128 | M | South Wes A Level or I   | 0 | 60  | N | Fail        |
| 585149 | M | Somalia Re Lower Tha     | 0 | 60  | N | Withdrawn   |
| 585162 | M | Addis Abak A Level or I  | 0 | 90  | N | Pass        |
| 585166 | M | Oromia Re HE Qualific    | 0 | 120 | N | Pass        |
| 585222 | F | South Regi A Level or I  | 0 | 60  | N | Pass        |
| 585230 | M | North Regi A Level or I  | 0 | 60  | N | Fail        |
| 585290 | M | Amhara Re A Level or I   | 0 | 60  | N | Withdrawn   |
| 585301 | M | North Regi A Level or I  | 0 | 90  | N | Fail        |
| 585305 | M | South Wes Lower Tha      | 0 | 60  | N | Pass        |
| 585383 | M | Oromia Re A Level or I   | 0 | 120 | N | Distinction |
| 585389 | M | Sidamo Re Lower Tha      | 0 | 120 | N | Withdrawn   |
| 585409 | M | Sidamo Re Lower Tha      | 0 | 90  | Y | Fail        |
| 585449 | M | Sidamo Re A Level or I   | 0 | 60  | N | Fail        |
| 585454 | M | South Regi Lower Tha     | 0 | 240 | N | Withdrawn   |
| 585466 | M | Oromia Re Lower Tha      | 0 | 60  | N | Distinction |
| 585484 | M | Tigrai Regi Lower Tha    | 0 | 60  | N | Fail        |
| 585574 | M | South Regi Lower Tha     | 0 | 120 | N | Pass        |
| 585615 | M | South Wes Lower Tha      | 0 | 120 | N | Fail        |
| 585659 | M | Oromia Re Lower Tha      | 0 | 60  | N | Pass        |
| 585724 | M | Sidamo Re Lower Tha      | 0 | 60  | N | Withdrawn   |
| 585731 | M | Afar Regioi A Level or I | 0 | 60  | N | Pass        |
| 585825 | M | Tigrai Regi Lower Tha    | 0 | 60  | N | Withdrawn   |
| 585942 | M | Addis Abak Lower Tha     | 0 | 150 | N | Fail        |
| 585965 | M | Sidamo Re Lower Tha      | 0 | 90  | N | Fail        |
| 586011 | F | North Regi A Level or I  | 0 | 60  | N | Withdrawn   |
| 586034 | M | South Wes A Level or I   | 0 | 60  | N | Distinction |
| 586080 | M | North Regi Lower Tha     | 0 | 60  | N | Fail        |
| 586112 | M | Addis Abak A Level or I  | 0 | 60  | N | Withdrawn   |
| 586224 | M | Amhara Re Lower Tha      | 0 | 60  | N | Fail        |
| 586233 | M | Addis Abak Lower Tha     | 0 | 60  | Y | Pass        |
| 586246 | M | Somalia Re Lower Tha     | 0 | 120 | N | Fail        |
| 586249 | M | North Regi A Level or I  | 0 | 60  | N | Withdrawn   |
| 586251 | M | Addis Abak A Level or I  | 0 | 60  | N | Withdrawn   |
| 586259 | M | Tigrai Regi A Level or I | 0 | 60  | N | Fail        |
| 586281 | F | Oromia Re Lower Tha      | 0 | 90  | N | Withdrawn   |
| 586428 | M | South Wes Lower Tha      | 0 | 60  | N | Pass        |
| 586445 | F | Somalia Re A Level or I  | 0 | 150 | N | Withdrawn   |
| 586446 | M | Sidamo Re A Level or I   | 0 | 60  | N | Pass        |
| 586468 | M | South Wes HE Qualific    | 0 | 60  | N | Pass        |
| 586477 | M | Sidamo Re A Level or I   | 0 | 120 | Y | Pass        |
| 586483 | M | South Regi Lower Tha     | 0 | 60  | Y | Pass        |
| 586510 | M | South Regi Lower Tha     | 0 | 60  | N | Withdrawn   |
| 586518 | M | Afar Regioi HE Qualific  | 0 | 120 | N | Pass        |

|        |   |                          |   |     |   |             |
|--------|---|--------------------------|---|-----|---|-------------|
| 586543 | M | North Regi HE Qualific   | 0 | 180 | N | Withdrawn   |
| 586594 | M | Addis Abak A Level or I  | 0 | 60  | N | Distinction |
| 586620 | M | South Wes A Level or I   | 0 | 60  | N | Withdrawn   |
| 586642 | M | Sidamo Re A Level or I   | 0 | 120 | N | Pass        |
| 586705 | M | Sidamo Re A Level or I   | 0 | 60  | N | Distinction |
| 586719 | F | South Regi Lower Thar    | 0 | 120 | N | Pass        |
| 586753 | M | Sidamo Re Lower Thar     | 0 | 120 | N | Fail        |
| 586758 | M | Somalia Re A Level or I  | 0 | 90  | N | Pass        |
| 586781 | M | South Regi HE Qualific   | 0 | 60  | N | Distinction |
| 586784 | F | Addis Abak A Level or I  | 0 | 120 | Y | Pass        |
| 586808 | M | South Regi Lower Thar    | 0 | 90  | N | Pass        |
| 586851 | M | Tigrai Regi Lower Thar   | 0 | 120 | N | Withdrawn   |
| 586855 | M | North Regi Lower Thar    | 0 | 60  | N | Pass        |
| 586891 | M | Addis Abak Lower Thar    | 0 | 120 | N | Pass        |
| 586906 | M | Afar Regio HE Qualific   | 0 | 180 | Y | Withdrawn   |
| 586925 | M | South Regi Lower Thar    | 0 | 60  | Y | Fail        |
| 586935 | M | Afar Regio HE Qualific   | 0 | 90  | N | Pass        |
| 586957 | M | Tigrai Regi A Level or I | 0 | 120 | Y | Pass        |
| 586974 | M | Addis Abak A Level or I  | 0 | 60  | N | Fail        |
| 587126 | M | South Regi HE Qualific   | 0 | 60  | N | Distinction |
| 587178 | M | North Regi HE Qualific   | 0 | 60  | N | Pass        |
| 587195 | M | South Wes Lower Thar     | 0 | 240 | Y | Withdrawn   |
| 587286 | M | South Wes HE Qualific    | 0 | 120 | N | Distinction |
| 587294 | M | Sidamo Re Lower Thar     | 0 | 60  | N | Pass        |
| 587308 | M | Amhara Re Lower Thar     | 0 | 60  | N | Fail        |
| 587324 | M | Afar Regio A Level or I  | 0 | 60  | N | Withdrawn   |
| 587334 | M | South Regi A Level or I  | 0 | 120 | N | Pass        |
| 587369 | M | Oromia Re HE Qualific    | 0 | 60  | N | Fail        |
| 587435 | M | Addis Abak Lower Thar    | 0 | 120 | N | Fail        |
| 587451 | M | Afar Regio HE Qualific   | 0 | 90  | N | Pass        |
| 587456 | M | Oromia Re A Level or I   | 0 | 60  | N | Pass        |
| 587462 | M | South Regi Lower Thar    | 0 | 120 | N | Fail        |
| 587594 | M | Afar Regio A Level or I  | 0 | 60  | N | Pass        |
| 587611 | M | Amhara Re Lower Thar     | 0 | 120 | N | Pass        |
| 587619 | M | Afar Regio Lower Thar    | 0 | 60  | N | Distinction |
| 587659 | M | Sidamo Re HE Qualific    | 0 | 60  | N | Withdrawn   |
| 587685 | M | Oromia Re Lower Thar     | 0 | 60  | N | Pass        |
| 587690 | F | Sidamo Re A Level or I   | 0 | 90  | N | Pass        |
| 587783 | M | Addis Abak Lower Thar    | 0 | 120 | N | Distinction |
| 587848 | F | Sidamo Re Post Gradu     | 0 | 60  | N | Pass        |
| 587859 | M | Addis Abak Lower Thar    | 0 | 120 | N | Withdrawn   |
| 587868 | F | Sidamo Re Lower Thar     | 0 | 60  | Y | Fail        |
| 587881 | M | Sidamo Re A Level or I   | 0 | 60  | N | Withdrawn   |
| 587912 | M | South Wes Lower Thar     | 0 | 120 | N | Withdrawn   |
| 587934 | F | Amhara Re A Level or I   | 0 | 90  | Y | Withdrawn   |
| 587976 | M | Sidamo Re HE Qualific    | 0 | 90  | N | Withdrawn   |
| 588052 | M | Somalia Re Lower Thar    | 0 | 120 | N | Fail        |

|        |   |                           |   |     |   |             |
|--------|---|---------------------------|---|-----|---|-------------|
| 588128 | M | Addis Abat A Level or I   | 0 | 120 | N | Fail        |
| 588131 | M | Addis Abat A Level or I   | 0 | 150 | N | Pass        |
| 588156 | M | South Regi A Level or I   | 0 | 120 | N | Pass        |
| 588175 | F | Sidamo Re Lower Thar      | 0 | 240 | N | Withdrawn   |
| 588236 | M | Oromia Re A Level or I    | 0 | 90  | N | Pass        |
| 588261 | M | South Regi HE Qualific    | 0 | 60  | N | Pass        |
| 588360 | M | Somalia Re A Level or I   | 0 | 120 | N | Withdrawn   |
| 588539 | M | North Regi Lower Thar     | 0 | 60  | N | Withdrawn   |
| 588560 | M | Oromia Re A Level or I    | 0 | 120 | Y | Fail        |
| 588597 | M | Sidamo Re A Level or I    | 0 | 120 | N | Fail        |
| 588672 | F | Afar Regioi HE Qualific   | 0 | 90  | N | Pass        |
| 588796 | M | Sidamo Re Lower Thar      | 0 | 150 | N | Withdrawn   |
| 588914 | M | Amhara Re Lower Thar      | 0 | 90  | N | Fail        |
| 588925 | M | Amhara Re A Level or I    | 0 | 120 | N | Fail        |
| 588971 | M | South Wes A Level or I    | 0 | 90  | N | Pass        |
| 589003 | M | Oromia Re A Level or I    | 0 | 120 | N | Pass        |
| 589014 | M | Afar Regioi HE Qualific   | 0 | 90  | N | Pass        |
| 589017 | M | South Wes A Level or I    | 0 | 60  | N | Withdrawn   |
| 589099 | M | Somalia Re Lower Thar     | 0 | 90  | N | Fail        |
| 589178 | M | South Regi Lower Thar     | 0 | 120 | N | Fail        |
| 589196 | M | Afar Regioi Lower Thar    | 0 | 60  | N | Withdrawn   |
| 589263 | M | North Regi A Level or I   | 0 | 120 | N | Pass        |
| 589267 | M | South Regi HE Qualific    | 0 | 150 | N | Withdrawn   |
| 589295 | M | North Regi A Level or I   | 0 | 90  | N | Pass        |
| 589303 | M | North Regi HE Qualific    | 0 | 60  | N | Pass        |
| 589326 | M | North Regi A Level or I   | 0 | 60  | N | Distinction |
| 589409 | M | Tigrai Regio A Level or I | 0 | 60  | N | Distinction |
| 589441 | M | South Regi Lower Thar     | 0 | 90  | N | Withdrawn   |
| 589474 | M | Sidamo Re Lower Thar      | 0 | 90  | N | Fail        |
| 589490 | M | South Regi Lower Thar     | 0 | 120 | N | Fail        |
| 589559 | M | Addis Abat A Level or I   | 0 | 60  | N | Pass        |
| 589578 | M | North Regi Lower Thar     | 0 | 90  | N | Pass        |
| 589583 | M | Tigrai Regio HE Qualific  | 0 | 90  | N | Distinction |
| 589587 | M | North Regi Lower Thar     | 0 | 120 | N | Pass        |
| 589594 | M | Afar Regioi A Level or I  | 0 | 90  | N | Withdrawn   |
| 589605 | M | Sidamo Re A Level or I    | 0 | 60  | N | Pass        |
| 589665 | M | South Wes Lower Thar      | 0 | 120 | N | Withdrawn   |
| 589707 | M | North Regi Lower Thar     | 0 | 60  | N | Fail        |
| 589749 | F | Tigrai Regio Lower Thar   | 0 | 60  | N | Fail        |
| 589768 | M | Sidamo Re A Level or I    | 0 | 120 | N | Withdrawn   |
| 589782 | M | Amhara Re HE Qualific     | 0 | 90  | N | Pass        |
| 589828 | M | Addis Abak Lower Thar     | 0 | 150 | Y | Withdrawn   |
| 589843 | M | Sidamo Re Lower Thar      | 0 | 60  | N | Fail        |
| 589860 | M | North Regi HE Qualific    | 0 | 60  | N | Pass        |
| 589948 | M | Sidamo Re Lower Thar      | 0 | 120 | N | Pass        |
| 590128 | M | South Regi HE Qualific    | 0 | 120 | N | Fail        |
| 590188 | M | South Regi Lower Thar     | 0 | 60  | N | Fail        |

|        |   |                          |   |     |   |             |
|--------|---|--------------------------|---|-----|---|-------------|
| 590189 | M | Sidamo Re A Level or I   | 0 | 120 | N | Fail        |
| 590226 | M | North Regi A Level or I  | 0 | 120 | Y | Pass        |
| 590241 | M | South Regi A Level or I  | 0 | 120 | N | Pass        |
| 590289 | M | Sidamo Re A Level or I   | 0 | 90  | N | Fail        |
| 590328 | M | Oromia Re HE Qualific    | 0 | 150 | N | Pass        |
| 590403 | F | Afar Regio HE Qualific   | 0 | 60  | N | Fail        |
| 590461 | F | South Regi A Level or I  | 0 | 120 | N | Fail        |
| 590462 | M | Amhara Re A Level or I   | 0 | 120 | N | Withdrawn   |
| 590466 | M | South Regi A Level or I  | 0 | 120 | N | Withdrawn   |
| 590494 | M | South Regi Lower Thar    | 0 | 120 | N | Withdrawn   |
| 590499 | M | North Regi HE Qualific   | 0 | 120 | N | Fail        |
| 590545 | M | North Regi Post Gradu    | 0 | 60  | N | Withdrawn   |
| 590548 | M | South Wes Lower Thar     | 0 | 120 | Y | Withdrawn   |
| 590555 | F | Amhara Re A Level or I   | 0 | 60  | N | Withdrawn   |
| 590571 | M | North Regi A Level or I  | 0 | 120 | N | Withdrawn   |
| 590701 | M | North Regi A Level or I  | 0 | 90  | Y | Distinction |
| 590707 | M | Sidamo Re Lower Thar     | 0 | 60  | N | Distinction |
| 590714 | M | North Regi A Level or I  | 0 | 120 | N | Fail        |
| 590749 | M | Addis Abak Lower Thar    | 0 | 90  | Y | Withdrawn   |
| 590815 | M | North Regi A Level or I  | 0 | 120 | N | Withdrawn   |
| 590824 | F | Sidamo Re Lower Thar     | 0 | 60  | N | Pass        |
| 590849 | M | Amhara Re A Level or I   | 0 | 180 | N | Pass        |
| 590898 | M | South Regi A Level or I  | 0 | 60  | N | Withdrawn   |
| 590907 | M | Somalia Re Lower Thar    | 0 | 60  | N | Pass        |
| 590980 | M | South Wes Lower Thar     | 0 | 60  | N | Pass        |
| 590989 | M | Oromia Re Lower Thar     | 0 | 120 | N | Pass        |
| 591008 | M | Somalia Re Lower Thar    | 0 | 60  | N | Withdrawn   |
| 591015 | M | Sidamo Re A Level or I   | 0 | 60  | N | Withdrawn   |
| 591055 | M | Somalia Re Lower Thar    | 0 | 90  | N | Pass        |
| 591057 | M | North Regi Lower Thar    | 0 | 120 | N | Withdrawn   |
| 591078 | M | South Wes HE Qualific    | 0 | 90  | N | Pass        |
| 591219 | M | Sidamo Re A Level or I   | 0 | 60  | N | Pass        |
| 591343 | M | Afar Regio A Level or I  | 0 | 150 | N | Pass        |
| 591394 | F | Sidamo Re Lower Thar     | 0 | 90  | N | Pass        |
| 591403 | M | Addis Abak A Level or I  | 0 | 60  | N | Distinction |
| 591411 | M | South Wes Lower Thar     | 0 | 60  | N | Withdrawn   |
| 591412 | M | South Wes A Level or I   | 0 | 60  | N | Fail        |
| 591516 | M | Amhara Re Lower Thar     | 0 | 90  | N | Fail        |
| 591581 | M | Oromia Re Lower Thar     | 0 | 120 | N | Fail        |
| 591613 | M | Oromia Re Lower Thar     | 0 | 60  | N | Withdrawn   |
| 591620 | M | South Wes A Level or I   | 0 | 120 | N | Withdrawn   |
| 591638 | F | Sidamo Re HE Qualific    | 0 | 120 | N | Withdrawn   |
| 591655 | M | North Regi Lower Thar    | 0 | 90  | N | Withdrawn   |
| 591661 | M | Addis Abak Lower Thar    | 0 | 120 | N | Withdrawn   |
| 591677 | M | North Regi Lower Thar    | 0 | 60  | N | Withdrawn   |
| 591685 | M | Tigrai Regi A Level or I | 0 | 60  | N | Pass        |
| 591692 | M | Amhara Re A Level or I   | 0 | 60  | N | Fail        |

|        |   |                             |   |     |   |             |
|--------|---|-----------------------------|---|-----|---|-------------|
| 591695 | M | Afar Region HE Qualific     | 0 | 60  | N | Pass        |
| 591735 | M | Oromia Region A Level or I  | 0 | 120 | N | Fail        |
| 591765 | M | Addis Ababa HE Qualific     | 0 | 120 | N | Pass        |
| 591872 | M | Amhara Region A Level or I  | 0 | 120 | N | Pass        |
| 591893 | M | Tigray Region A Level or I  | 0 | 120 | N | Fail        |
| 591940 | M | Sidamo Region Lower Than    | 0 | 60  | N | Pass        |
| 591975 | M | Amhara Region Lower Than    | 0 | 60  | N | Fail        |
| 592002 | M | South Region A Level or I   | 0 | 90  | N | Fail        |
| 592007 | M | Amhara Region A Level or I  | 0 | 120 | N | Pass        |
| 592014 | M | Sidamo Region Lower Than    | 0 | 120 | N | Pass        |
| 592092 | F | South West A Level or I     | 0 | 60  | N | Pass        |
| 592142 | M | Tigray Region Lower Than    | 0 | 60  | N | Fail        |
| 592168 | M | Addis Ababa A Level or I    | 0 | 60  | N | Pass        |
| 592203 | M | Amhara Region A Level or I  | 0 | 60  | Y | Distinction |
| 592206 | F | North Region Lower Than     | 0 | 60  | N | Fail        |
| 592259 | M | Sidamo Region A Level or I  | 0 | 150 | N | Pass        |
| 592370 | M | Afar Region HE Qualific     | 0 | 60  | N | Pass        |
| 592373 | M | Somalia Region A Level or I | 0 | 90  | Y | Distinction |
| 592437 | M | Addis Ababa A Level or I    | 0 | 120 | N | Withdrawn   |
| 592450 | F | Somalia Region A Level or I | 0 | 60  | N | Withdrawn   |
| 592458 | F | South West Lower Than       | 0 | 60  | N | Withdrawn   |
| 592476 | F | South Region Lower Than     | 0 | 120 | N | Pass        |
| 592538 | M | North Region Lower Than     | 0 | 60  | N | Withdrawn   |
| 592550 | M | South Region A Level or I   | 0 | 150 | N | Fail        |
| 592563 | M | Somalia Region A Level or I | 0 | 120 | N | Withdrawn   |
| 592607 | M | Afar Region HE Qualific     | 0 | 60  | N | Withdrawn   |
| 592616 | M | South Region A Level or I   | 0 | 120 | N | Pass        |
| 592631 | F | Afar Region HE Qualific     | 0 | 60  | N | Distinction |
| 592634 | M | Amhara Region No Formal     | 0 | 60  | N | Fail        |
| 592640 | M | South West Lower Than       | 0 | 90  | N | Distinction |
| 592689 | M | Addis Ababa HE Qualific     | 0 | 60  | N | Pass        |
| 592763 | M | South Region A Level or I   | 0 | 60  | Y | Pass        |
| 592781 | M | Amhara Region Lower Than    | 0 | 60  | N | Pass        |
| 592789 | M | Tigray Region Lower Than    | 0 | 120 | N | Pass        |
| 592810 | M | Sidamo Region Lower Than    | 0 | 120 | Y | Fail        |
| 592856 | M | South Region Lower Than     | 0 | 60  | N | Pass        |
| 592924 | M | South Region A Level or I   | 0 | 60  | N | Pass        |
| 592939 | M | Afar Region HE Qualific     | 0 | 240 | N | Withdrawn   |
| 593022 | M | Amhara Region A Level or I  | 0 | 60  | N | Distinction |
| 593104 | M | South Region Lower Than     | 0 | 60  | N | Withdrawn   |
| 593139 | M | Tigray Region A Level or I  | 0 | 60  | N | Fail        |
| 593157 | F | South West Lower Than       | 0 | 60  | N | Withdrawn   |
| 593206 | M | Addis Ababa Lower Than      | 0 | 180 | N | Withdrawn   |
| 593272 | F | Sidamo Region A Level or I  | 0 | 60  | N | Distinction |
| 593320 | M | South West HE Qualific      | 0 | 60  | N | Pass        |
| 593459 | M | Sidamo Region A Level or I  | 0 | 60  | N | Pass        |
| 593492 | M | South Region A Level or I   | 0 | 120 | N | Pass        |

|        |   |                          |   |     |   |             |
|--------|---|--------------------------|---|-----|---|-------------|
| 593511 | M | South Regi HE Qualific   | 0 | 60  | N | Withdrawn   |
| 593532 | M | Oromia Re Lower Thar     | 0 | 120 | N | Withdrawn   |
| 593535 | M | Somalia Re Lower Thar    | 0 | 120 | N | Fail        |
| 593585 | F | Amhara Re A Level or I   | 0 | 90  | N | Pass        |
| 593617 | M | Afar Regioi A Level or I | 0 | 120 | N | Withdrawn   |
| 593670 | M | South Wes Lower Thar     | 0 | 60  | N | Fail        |
| 593671 | M | Amhara Re Lower Thar     | 0 | 90  | Y | Fail        |
| 593681 | M | Sidamo Re Lower Thar     | 0 | 120 | N | Pass        |
| 593755 | M | Amhara Re A Level or I   | 0 | 60  | N | Pass        |
| 593780 | M | Somalia Re A Level or I  | 0 | 120 | N | Fail        |
| 593823 | M | Addis Abak HE Qualific   | 0 | 90  | N | Pass        |
| 593865 | M | Addis Abak Lower Thar    | 0 | 60  | N | Withdrawn   |
| 593904 | M | South Wes A Level or I   | 0 | 60  | N | Fail        |
| 593953 | M | Oromia Re HE Qualific    | 0 | 60  | N | Pass        |
| 593970 | M | Afar Regioi HE Qualific  | 0 | 60  | N | Fail        |
| 594044 | M | Tigrai Regio HE Qualific | 0 | 90  | N | Pass        |
| 594076 | F | Afar Regioi A Level or I | 0 | 60  | N | Withdrawn   |
| 594119 | M | Addis Abak A Level or I  | 0 | 60  | N | Pass        |
| 594139 | M | Addis Abak A Level or I  | 0 | 60  | N | Pass        |
| 594162 | M | Amhara Re Lower Thar     | 0 | 120 | N | Pass        |
| 594184 | M | Afar Regioi HE Qualific  | 0 | 60  | N | Fail        |
| 594205 | M | Amhara Re A Level or I   | 0 | 120 | Y | Pass        |
| 594221 | M | Amhara Re A Level or I   | 0 | 120 | Y | Withdrawn   |
| 594250 | F | Addis Abak A Level or I  | 0 | 90  | N | Pass        |
| 594280 | F | Sidamo Re Lower Thar     | 0 | 60  | N | Fail        |
| 594291 | M | South Wes A Level or I   | 0 | 60  | N | Fail        |
| 594319 | M | Afar Regioi HE Qualific  | 0 | 60  | N | Pass        |
| 594326 | M | South Regi A Level or I  | 0 | 120 | N | Pass        |
| 594341 | M | South Regi A Level or I  | 0 | 120 | N | Withdrawn   |
| 594342 | M | South Regi A Level or I  | 0 | 120 | N | Fail        |
| 594359 | F | Amhara Re Lower Thar     | 0 | 60  | N | Fail        |
| 594360 | M | Oromia Re HE Qualific    | 0 | 60  | N | Fail        |
| 594376 | M | Afar Regioi HE Qualific  | 0 | 90  | N | Withdrawn   |
| 594395 | M | Oromia Re A Level or I   | 0 | 60  | N | Withdrawn   |
| 594404 | M | Amhara Re A Level or I   | 0 | 60  | N | Fail        |
| 594406 | M | Amhara Re HE Qualific    | 0 | 120 | N | Fail        |
| 594454 | M | Somalia Re Lower Thar    | 0 | 60  | N | Fail        |
| 594470 | M | Afar Regioi A Level or I | 0 | 60  | N | Fail        |
| 594505 | M | Sidamo Re A Level or I   | 0 | 60  | N | Pass        |
| 594506 | M | Oromia Re Lower Thar     | 0 | 60  | N | Pass        |
| 594510 | M | Somalia Re Lower Thar    | 0 | 60  | N | Withdrawn   |
| 594546 | M | South Wes A Level or I   | 0 | 120 | N | Distinction |
| 594547 | M | South Regi A Level or I  | 0 | 60  | N | Pass        |
| 594558 | M | South Regi A Level or I  | 0 | 60  | N | Distinction |
| 594576 | M | Sidamo Re A Level or I   | 0 | 90  | N | Pass        |
| 594596 | F | Amhara Re Lower Thar     | 0 | 120 | N | Pass        |
| 594603 | F | South Regi A Level or I  | 0 | 120 | N | Withdrawn   |

|        |   |                           |   |     |   |             |
|--------|---|---------------------------|---|-----|---|-------------|
| 594615 | M | Tigray Region Lower Than  | 0 | 90  | N | Withdrawn   |
| 594643 | M | South Region A Level or   | 0 | 120 | N | Fail        |
| 594737 | M | Sidamo Region A Level or  | 0 | 90  | N | Withdrawn   |
| 594800 | M | Afar Region HE Qualific   | 0 | 60  | N | Fail        |
| 594814 | M | Sidamo Region A Level or  | 0 | 60  | N | Pass        |
| 594815 | M | South West Lower Than     | 0 | 120 | N | Withdrawn   |
| 594823 | M | Addis Ababa A Level or    | 0 | 120 | N | Fail        |
| 594855 | M | South Region A Level or   | 0 | 150 | N | Pass        |
| 594881 | M | Somalia Region A Level or | 0 | 90  | N | Withdrawn   |
| 594894 | M | Addis Ababa A Level or    | 0 | 60  | N | Pass        |
| 594933 | M | Amhara Region Lower Than  | 0 | 120 | N | Withdrawn   |
| 594956 | M | South Region A Level or   | 0 | 150 | Y | Withdrawn   |
| 594996 | M | South Region Lower Than   | 0 | 120 | N | Withdrawn   |
| 595023 | F | North Region Lower Than   | 0 | 60  | N | Fail        |
| 595106 | M | South West A Level or     | 0 | 60  | N | Distinction |
| 595119 | M | Sidamo Region A Level or  | 0 | 60  | N | Withdrawn   |
| 595150 | M | Somalia Region Lower Than | 0 | 120 | N | Fail        |
| 595164 | M | Somalia Region A Level or | 0 | 120 | Y | Pass        |
| 595230 | F | Sidamo Region A Level or  | 0 | 150 | N | Pass        |
| 595235 | F | Addis Ababa A Level or    | 0 | 150 | N | Fail        |
| 595246 | M | Amhara Region Lower Than  | 0 | 120 | N | Withdrawn   |
| 595330 | M | South Region A Level or   | 0 | 120 | N | Pass        |
| 595354 | F | North Region HE Qualific  | 0 | 120 | N | Pass        |
| 595359 | M | South West HE Qualific    | 0 | 60  | N | Withdrawn   |
| 595381 | M | Sidamo Region Lower Than  | 0 | 120 | N | Pass        |
| 595386 | M | South Region A Level or   | 0 | 120 | N | Pass        |
| 595401 | M | North Region Lower Than   | 0 | 60  | N | Pass        |
| 595428 | M | Amhara Region HE Qualific | 0 | 150 | N | Withdrawn   |
| 595477 | M | Sidamo Region Lower Than  | 0 | 150 | N | Fail        |
| 595483 | M | Addis Ababa Lower Than    | 0 | 60  | N | Fail        |
| 595593 | M | Tigray Region A Level or  | 0 | 60  | Y | Fail        |
| 595649 | M | Sidamo Region A Level or  | 0 | 120 | N | Pass        |
| 595655 | M | South Region Lower Than   | 0 | 60  | N | Pass        |
| 595676 | M | Sidamo Region Lower Than  | 0 | 60  | N | Withdrawn   |
| 595735 | M | Addis Ababa Lower Than    | 0 | 60  | N | Pass        |
| 595746 | M | South Region Lower Than   | 0 | 60  | N | Distinction |
| 595752 | F | North Region Post Gradu   | 0 | 120 | N | Distinction |
| 595769 | M | Amhara Region HE Qualific | 0 | 120 | N | Pass        |
| 595773 | M | Addis Ababa Lower Than    | 0 | 60  | N | Withdrawn   |
| 595840 | M | South Region Lower Than   | 0 | 60  | N | Distinction |
| 595842 | M | North Region A Level or   | 0 | 120 | N | Pass        |
| 595847 | M | Tigray Region HE Qualific | 0 | 120 | N | Distinction |
| 595868 | M | Addis Ababa Lower Than    | 0 | 60  | N | Pass        |
| 595895 | M | South West Lower Than     | 0 | 120 | N | Withdrawn   |
| 595915 | F | Sidamo Region Lower Than  | 0 | 240 | N | Withdrawn   |
| 595935 | M | South Region A Level or   | 0 | 120 | N | Withdrawn   |
| 595978 | M | Addis Ababa Lower Than    | 0 | 180 | Y | Withdrawn   |

|        |   |                         |   |     |   |             |
|--------|---|-------------------------|---|-----|---|-------------|
| 596027 | M | South Regi Lower Tha    | 0 | 120 | N | Pass        |
| 596029 | M | Sidamo Re Lower Tha     | 0 | 120 | N | Fail        |
| 596049 | M | Sidamo Re Lower Tha     | 0 | 120 | N | Withdrawn   |
| 596125 | M | South Wes Lower Tha     | 0 | 120 | N | Fail        |
| 596146 | M | Oromia Re Lower Tha     | 0 | 60  | N | Withdrawn   |
| 596147 | M | Amhara Re Lower Tha     | 0 | 60  | N | Pass        |
| 596231 | M | Amhara Re A Level or I  | 0 | 90  | N | Withdrawn   |
| 596266 | M | Oromia Re A Level or I  | 0 | 90  | N | Fail        |
| 596296 | M | Amhara Re A Level or I  | 0 | 90  | Y | Fail        |
| 596368 | M | Amhara Re Lower Tha     | 0 | 60  | N | Pass        |
| 596369 | M | South Wes Lower Tha     | 0 | 90  | N | Withdrawn   |
| 596406 | M | South Regi A Level or I | 0 | 120 | N | Fail        |
| 596480 | M | Somalia Re A Level or I | 0 | 60  | N | Withdrawn   |
| 596490 | M | Sidamo Re Lower Tha     | 0 | 120 | N | Pass        |
| 596521 | M | Afar Regio A Level or I | 0 | 120 | N | Fail        |
| 596593 | M | Afar Regio A Level or I | 0 | 60  | N | Pass        |
| 596601 | F | Oromia Re A Level or I  | 0 | 180 | N | Withdrawn   |
| 596624 | M | South Wes A Level or I  | 0 | 120 | N | Fail        |
| 596646 | M | Sidamo Re Lower Tha     | 0 | 120 | N | Pass        |
| 596687 | M | North Regi HE Qualific  | 0 | 120 | N | Distinction |
| 596691 | M | South Wes Lower Tha     | 0 | 120 | N | Fail        |
| 596739 | M | North Regi Lower Tha    | 0 | 60  | N | Withdrawn   |
| 596754 | M | Somalia Re Lower Tha    | 0 | 60  | N | Withdrawn   |
| 596756 | M | Oromia Re Lower Tha     | 0 | 60  | N | Pass        |
| 596774 | M | Addis Abat A Level or I | 0 | 120 | N | Withdrawn   |
| 596828 | M | South Regi Lower Tha    | 0 | 60  | N | Pass        |
| 596829 | M | Addis Abat A Level or I | 0 | 60  | N | Withdrawn   |
| 596858 | M | Afar Regio HE Qualific  | 0 | 90  | N | Withdrawn   |
| 596860 | M | Amhara Re HE Qualific   | 0 | 60  | N | Pass        |
| 596938 | M | South Regi A Level or I | 0 | 60  | N | Pass        |
| 596981 | M | Afar Regio A Level or I | 0 | 60  | N | Pass        |
| 596982 | M | Somalia Re A Level or I | 0 | 120 | N | Pass        |
| 597074 | M | Sidamo Re A Level or I  | 0 | 240 | N | Fail        |
| 597098 | M | Tigrai Regi Lower Tha   | 0 | 120 | N | Fail        |
| 597190 | M | Amhara Re Lower Tha     | 0 | 60  | N | Withdrawn   |
| 597199 | F | North Regi A Level or I | 0 | 60  | N | Pass        |
| 597204 | M | Afar Regio HE Qualific  | 0 | 60  | N | Pass        |
| 597238 | F | Oromia Re A Level or I  | 0 | 120 | Y | Withdrawn   |
| 597241 | M | South Regi A Level or I | 0 | 120 | N | Distinction |
| 597293 | M | South Regi Lower Tha    | 0 | 120 | N | Pass        |
| 597402 | M | Sidamo Re A Level or I  | 0 | 120 | N | Withdrawn   |
| 597415 | M | North Regi HE Qualific  | 0 | 60  | N | Fail        |
| 597485 | M | South Wes Lower Tha     | 0 | 60  | N | Pass        |
| 597555 | M | Sidamo Re Lower Tha     | 0 | 60  | N | Withdrawn   |
| 597557 | M | Addis Abat Lower Tha    | 0 | 60  | N | Withdrawn   |
| 597627 | M | Oromia Re Lower Tha     | 0 | 60  | N | Pass        |
| 597715 | M | Amhara Re Lower Tha     | 0 | 60  | N | Pass        |



|        |   |                          |   |     |   |             |
|--------|---|--------------------------|---|-----|---|-------------|
| 597737 | M | Afar Region A Level or I | 0 | 60  | N | Pass        |
| 597747 | M | Addis Abab HE Qualific   | 0 | 90  | N | Fail        |
| 597761 | F | South Regi Lower Thar    | 0 | 120 | N | Withdrawn   |
| 597787 | M | Sidamo Re A Level or I   | 0 | 60  | N | Distinction |
| 597791 | M | Somalia Re A Level or I  | 0 | 60  | N | Pass        |
| 597797 | M | Sidamo Re A Level or I   | 0 | 60  | N | Pass        |
| 597817 | F | Addis Abab A Level or I  | 0 | 120 | N | Fail        |
| 597819 | M | North Regi Lower Thar    | 0 | 60  | N | Distinction |
| 597880 | M | North Regi A Level or I  | 0 | 60  | N | Withdrawn   |
| 597906 | M | Afar Region A Level or I | 0 | 60  | N | Pass        |
| 597912 | M | Oromia Re Lower Thar     | 0 | 120 | N | Fail        |
| 597931 | M | South Regi Lower Thar    | 0 | 60  | N | Withdrawn   |
| 598001 | M | Sidamo Re Lower Thar     | 0 | 90  | N | Fail        |
| 598032 | F | Amhara Re Lower Thar     | 0 | 60  | N | Fail        |
| 598077 | M | Tigray Regi Lower Thar   | 0 | 60  | N | Pass        |
| 598213 | F | Amhara Re No Formal      | 0 | 60  | N | Pass        |
| 598215 | M | South Regi A Level or I  | 0 | 60  | N | Pass        |
| 598235 | M | South Regi HE Qualific   | 0 | 120 | N | Fail        |
| 598259 | M | South Wes A Level or I   | 0 | 120 | Y | Withdrawn   |
| 598268 | F | South Regi Lower Thar    | 0 | 120 | N | Withdrawn   |
| 598279 | F | Sidamo Re A Level or I   | 0 | 60  | N | Pass        |
| 598285 | M | South Wes Lower Thar     | 0 | 120 | Y | Pass        |
| 598294 | M | Sidamo Re HE Qualific    | 0 | 60  | N | Pass        |
| 598299 | M | Sidamo Re A Level or I   | 0 | 60  | N | Pass        |
| 598306 | M | Addis Abab A Level or I  | 0 | 120 | N | Fail        |
| 598308 | M | South Wes Post Gradu     | 0 | 120 | N | Withdrawn   |
| 598353 | M | South Regi HE Qualific   | 0 | 150 | N | Withdrawn   |
| 598376 | M | South Wes HE Qualific    | 0 | 60  | N | Pass        |
| 598385 | M | North Regi Lower Thar    | 0 | 60  | N | Fail        |
| 598478 | F | Afar Region A Level or I | 0 | 120 | N | Withdrawn   |
| 598480 | M | Sidamo Re Lower Thar     | 0 | 60  | N | Fail        |
| 598498 | M | Oromia Re Lower Thar     | 0 | 60  | N | Withdrawn   |
| 598543 | M | Addis Abab Lower Thar    | 0 | 90  | N | Pass        |
| 598555 | F | Sidamo Re Lower Thar     | 0 | 120 | N | Pass        |
| 598629 | M | Amhara Re Lower Thar     | 0 | 120 | N | Withdrawn   |
| 598649 | F | Sidamo Re HE Qualific    | 0 | 120 | N | Fail        |
| 598666 | M | Sidamo Re No Formal      | 0 | 120 | N | Withdrawn   |
| 598706 | M | South Regi Lower Thar    | 0 | 120 | N | Distinction |
| 598752 | M | South Wes A Level or I   | 0 | 60  | N | Withdrawn   |
| 598757 | M | South Regi A Level or I  | 0 | 90  | N | Withdrawn   |
| 598761 | F | South Regi A Level or I  | 0 | 120 | N | Distinction |
| 598835 | M | Afar Region A Level or I | 0 | 60  | N | Distinction |
| 598887 | M | South Regi A Level or I  | 0 | 60  | N | Withdrawn   |
| 598962 | M | Oromia Re A Level or I   | 0 | 120 | N | Withdrawn   |
| 598966 | M | Oromia Re A Level or I   | 0 | 120 | Y | Pass        |
| 598983 | M | Afar Region A Level or I | 0 | 60  | N | Pass        |
| 599094 | M | South Wes A Level or I   | 0 | 90  | N | Pass        |

|        |   |                            |   |     |   |             |
|--------|---|----------------------------|---|-----|---|-------------|
| 599104 | M | Afar Region HE Qualific    | 0 | 120 | N | Pass        |
| 599114 | M | Afar Region Lower Than     | 0 | 60  | N | Withdrawn   |
| 599168 | M | Somalia Region Lower Than  | 0 | 60  | N | Fail        |
| 599199 | M | South Region Lower Than    | 0 | 60  | N | Pass        |
| 599245 | M | South Region A Level or I  | 0 | 60  | N | Pass        |
| 599289 | M | Amhara Region A Level or I | 0 | 60  | N | Distinction |
| 599297 | M | Sidamo Region A Level or I | 0 | 120 | N | Fail        |
| 599315 | M | South Region HE Qualific   | 0 | 120 | N | Distinction |
| 599370 | M | Addis Ababa A Level or I   | 0 | 60  | N | Pass        |
| 599445 | F | Afar Region HE Qualific    | 0 | 90  | N | Pass        |
| 599464 | M | Sidamo Region Lower Than   | 0 | 120 | N | Withdrawn   |
| 599468 | M | Amhara Region Lower Than   | 0 | 60  | N | Pass        |
| 599559 | M | Addis Ababa HE Qualific    | 0 | 60  | N | Distinction |
| 599568 | M | Addis Ababa A Level or I   | 0 | 120 | N | Fail        |
| 599570 | M | Amhara Region Lower Than   | 0 | 60  | N | Fail        |
| 599587 | M | North Region Lower Than    | 0 | 60  | N | Pass        |
| 599595 | M | Oromia Region A Level or I | 0 | 120 | N | Withdrawn   |
| 599663 | M | North Region HE Qualific   | 0 | 60  | N | Pass        |
| 599683 | F | Afar Region HE Qualific    | 0 | 90  | N | Distinction |
| 599718 | M | Afar Region HE Qualific    | 0 | 90  | N | Pass        |
| 599776 | M | South Region Lower Than    | 0 | 90  | N | Withdrawn   |
| 599783 | M | South West A Level or I    | 0 | 90  | N | Pass        |
| 599795 | M | Sidamo Region Lower Than   | 0 | 60  | N | Withdrawn   |
| 599805 | M | South Region A Level or I  | 0 | 180 | N | Withdrawn   |
| 599816 | M | Addis Ababa HE Qualific    | 0 | 120 | Y | Pass        |
| 599857 | M | Afar Region Lower Than     | 0 | 90  | N | Pass        |
| 599907 | F | Afar Region HE Qualific    | 0 | 60  | N | Fail        |
| 599957 | M | Amhara Region Lower Than   | 0 | 60  | N | Withdrawn   |
| 599994 | M | North Region A Level or I  | 0 | 60  | N | Withdrawn   |
| 600037 | M | South West Lower Than      | 0 | 120 | N | Withdrawn   |
| 600175 | M | Amhara Region HE Qualific  | 0 | 90  | N | Pass        |
| 600224 | M | Amhara Region A Level or I | 0 | 120 | Y | Pass        |
| 600243 | M | Afar Region HE Qualific    | 0 | 60  | N | Pass        |
| 600367 | M | Amhara Region Lower Than   | 0 | 90  | Y | Fail        |
| 600436 | F | South Region HE Qualific   | 0 | 120 | Y | Withdrawn   |
| 600515 | M | North Region A Level or I  | 0 | 60  | N | Fail        |
| 600542 | M | South West A Level or I    | 0 | 90  | N | Pass        |
| 600558 | M | Afar Region Lower Than     | 0 | 60  | N | Pass        |
| 600564 | M | South Region A Level or I  | 0 | 120 | N | Withdrawn   |
| 600615 | M | South West Lower Than      | 0 | 90  | N | Withdrawn   |
| 600667 | M | Sidamo Region A Level or I | 0 | 60  | N | Withdrawn   |
| 600676 | M | Oromia Region Lower Than   | 0 | 60  | N | Pass        |
| 600682 | M | South Region HE Qualific   | 0 | 90  | N | Pass        |
| 600746 | M | Amhara Region A Level or I | 0 | 60  | N | Withdrawn   |
| 600748 | M | Addis Ababa Lower Than     | 0 | 60  | N | Withdrawn   |
| 600808 | M | South Region A Level or I  | 0 | 60  | N | Withdrawn   |
| 600860 | F | Afar Region A Level or I   | 0 | 60  | N | Pass        |

|        |   |                          |   |     |   |             |
|--------|---|--------------------------|---|-----|---|-------------|
| 600944 | M | South Regi Lower Tha     | 0 | 60  | N | Pass        |
| 600947 | M | South Regi Lower Tha     | 0 | 120 | N | Fail        |
| 600955 | M | Addis Abak A Level or I  | 0 | 60  | N | Withdrawn   |
| 600991 | M | Afar Regio HE Qualific   | 0 | 90  | N | Pass        |
| 601021 | M | South Wes HE Qualific    | 0 | 90  | N | Pass        |
| 601040 | M | Addis Abak Lower Tha     | 0 | 120 | N | Pass        |
| 601042 | M | South Wes Lower Tha      | 0 | 60  | N | Fail        |
| 601074 | M | Addis Abak A Level or I  | 0 | 90  | N | Withdrawn   |
| 601080 | M | Tigrai Regi Lower Tha    | 0 | 60  | N | Fail        |
| 601099 | M | Amhara Re A Level or I   | 0 | 120 | N | Pass        |
| 601104 | M | South Regi Lower Tha     | 0 | 60  | N | Pass        |
| 601105 | M | North Regi Lower Tha     | 0 | 120 | N | Pass        |
| 601180 | M | Afar Regio HE Qualific   | 0 | 60  | N | Withdrawn   |
| 601184 | M | Amhara Re A Level or I   | 0 | 60  | N | Fail        |
| 601213 | M | South Regi HE Qualific   | 0 | 90  | N | Distinction |
| 601217 | M | Afar Regio Lower Tha     | 0 | 60  | N | Withdrawn   |
| 601271 | M | South Wes Lower Tha      | 0 | 60  | Y | Withdrawn   |
| 601388 | F | Oromia Re A Level or I   | 0 | 60  | N | Pass        |
| 601389 | M | Addis Abak A Level or I  | 0 | 120 | Y | Distinction |
| 601390 | F | Sidamo Re A Level or I   | 0 | 90  | N | Pass        |
| 601399 | M | South Wes Lower Tha      | 0 | 120 | N | Pass        |
| 601430 | M | Amhara Re A Level or I   | 0 | 90  | N | Pass        |
| 601439 | F | Afar Regio HE Qualific   | 0 | 90  | Y | Pass        |
| 601583 | M | Amhara Re A Level or I   | 0 | 120 | N | Pass        |
| 601640 | M | Sidamo Re HE Qualific    | 0 | 90  | N | Fail        |
| 601681 | M | South Wes Lower Tha      | 0 | 60  | N | Pass        |
| 601745 | M | Sidamo Re A Level or I   | 0 | 60  | Y | Fail        |
| 601761 | M | Sidamo Re A Level or I   | 0 | 60  | N | Withdrawn   |
| 601783 | F | Afar Regio HE Qualific   | 0 | 60  | N | Withdrawn   |
| 601788 | M | Amhara Re Lower Tha      | 0 | 90  | N | Pass        |
| 601808 | F | Afar Regio A Level or I  | 0 | 60  | N | Pass        |
| 601855 | M | Oromia Re Lower Tha      | 0 | 60  | N | Withdrawn   |
| 601952 | F | Somalia Re Lower Tha     | 0 | 60  | N | Pass        |
| 602053 | M | Oromia Re A Level or I   | 0 | 60  | N | Withdrawn   |
| 602097 | M | Addis Abak A Level or I  | 0 | 60  | Y | Fail        |
| 602099 | F | North Regi Lower Tha     | 0 | 120 | N | Pass        |
| 602111 | M | Amhara Re Lower Tha      | 0 | 60  | Y | Fail        |
| 602152 | M | Sidamo Re A Level or I   | 0 | 120 | N | Withdrawn   |
| 602312 | M | Sidamo Re A Level or I   | 0 | 120 | Y | Pass        |
| 602320 | M | Sidamo Re A Level or I   | 0 | 120 | N | Withdrawn   |
| 602344 | M | North Regi Lower Tha     | 0 | 90  | N | Fail        |
| 602406 | M | Somalia Re A Level or I  | 0 | 120 | N | Withdrawn   |
| 602451 | M | North Regi A Level or I  | 0 | 60  | N | Pass        |
| 602468 | M | Oromia Re Lower Tha      | 0 | 90  | N | Pass        |
| 602469 | F | Tigrai Regi A Level or I | 0 | 60  | N | Pass        |
| 602502 | M | Afar Regio A Level or I  | 0 | 120 | Y | Withdrawn   |
| 602511 | F | South Wes Lower Tha      | 0 | 60  | N | Pass        |

|        |   |                             |   |     |   |             |
|--------|---|-----------------------------|---|-----|---|-------------|
| 602516 | F | Addis Abat A Level or I     | 0 | 60  | N | Pass        |
| 602569 | F | Afar Region A Level or I    | 0 | 60  | N | Fail        |
| 602577 | M | Afar Region A Level or I    | 0 | 60  | N | Pass        |
| 602592 | F | Sidamo Region Lower Than    | 0 | 60  | N | Fail        |
| 602600 | M | Afar Region Lower Than      | 0 | 60  | N | Fail        |
| 602669 | M | South Region A Level or I   | 0 | 90  | N | Distinction |
| 602672 | M | Somalia Region Lower Than   | 0 | 180 | N | Withdrawn   |
| 602713 | M | Afar Region HE Qualific     | 0 | 90  | N | Distinction |
| 602719 | M | Addis Abak A Level or I     | 0 | 120 | N | Pass        |
| 602734 | M | South Region HE Qualific    | 0 | 150 | N | Fail        |
| 602777 | M | Somalia Region A Level or I | 0 | 150 | N | Pass        |
| 602781 | M | Oromia Region A Level or I  | 0 | 120 | Y | Withdrawn   |
| 602792 | M | Sidamo Region Lower Than    | 0 | 60  | N | Withdrawn   |
| 602811 | M | North Region Lower Than     | 0 | 120 | N | Pass        |
| 602837 | M | North Region HE Qualific    | 0 | 60  | N | Pass        |
| 602895 | F | Afar Region HE Qualific     | 0 | 90  | N | Fail        |
| 602948 | M | South Region A Level or I   | 0 | 90  | N | Pass        |
| 602994 | M | Sidamo Region A Level or I  | 0 | 120 | N | Withdrawn   |
| 603030 | M | Tigray Region HE Qualific   | 0 | 60  | N | Fail        |
| 603059 | M | South West Lower Than       | 0 | 120 | N | Distinction |
| 603111 | F | South Region A Level or I   | 0 | 120 | N | Withdrawn   |
| 603148 | M | Sidamo Region Lower Than    | 0 | 120 | N | Withdrawn   |
| 603155 | M | Afar Region Lower Than      | 0 | 60  | N | Pass        |
| 603170 | M | Sidamo Region Lower Than    | 0 | 90  | N | Distinction |
| 603199 | M | Amhara Region Lower Than    | 0 | 90  | N | Withdrawn   |
| 603204 | F | Sidamo Region HE Qualific   | 0 | 180 | N | Withdrawn   |
| 603216 | M | North Region A Level or I   | 0 | 120 | N | Fail        |
| 603220 | M | Somalia Region Lower Than   | 0 | 120 | N | Fail        |
| 603231 | M | Afar Region HE Qualific     | 0 | 60  | N | Pass        |
| 603260 | F | South West Lower Than       | 0 | 60  | N | Withdrawn   |
| 603300 | M | North Region A Level or I   | 0 | 60  | N | Pass        |
| 603327 | M | Afar Region A Level or I    | 0 | 60  | N | Pass        |
| 603341 | M | North Region Lower Than     | 0 | 60  | N | Pass        |
| 603389 | M | Somalia Region Lower Than   | 0 | 60  | N | Pass        |
| 603423 | M | North Region A Level or I   | 0 | 60  | N | Withdrawn   |
| 603437 | M | Sidamo Region Lower Than    | 0 | 120 | N | Pass        |
| 603529 | M | Afar Region A Level or I    | 0 | 60  | N | Pass        |
| 603575 | M | South Region Lower Than     | 0 | 120 | N | Withdrawn   |
| 603576 | M | Somalia Region A Level or I | 0 | 60  | N | Pass        |
| 603597 | M | Sidamo Region A Level or I  | 0 | 90  | N | Pass        |
| 603600 | M | Addis Abak Lower Than       | 0 | 60  | N | Pass        |
| 603611 | M | Addis Abak A Level or I     | 0 | 60  | N | Pass        |
| 603651 | M | South Region A Level or I   | 0 | 60  | N | Distinction |
| 603733 | M | South Region A Level or I   | 0 | 60  | N | Pass        |
| 603819 | M | Afar Region A Level or I    | 0 | 60  | N | Pass        |
| 603848 | M | Sidamo Region Lower Than    | 0 | 120 | Y | Withdrawn   |
| 603873 | M | South Region Lower Than     | 0 | 120 | N | Withdrawn   |

|        |   |                         |   |     |   |             |
|--------|---|-------------------------|---|-----|---|-------------|
| 603931 | M | North Regi Lower Tha    | 0 | 120 | N | Withdrawn   |
| 604087 | M | South Regi Lower Tha    | 0 | 90  | N | Fail        |
| 604142 | M | South Regi Lower Tha    | 0 | 120 | N | Withdrawn   |
| 604184 | M | Somalia Re A Level or I | 0 | 120 | N | Pass        |
| 604228 | M | Amhara Re Lower Tha     | 0 | 90  | N | Withdrawn   |
| 604258 | M | Afar Regio Lower Tha    | 0 | 60  | N | Withdrawn   |
| 604296 | M | Addis Abak A Level or I | 0 | 120 | N | Withdrawn   |
| 604379 | M | Addis Abak A Level or I | 0 | 60  | N | Pass        |
| 604416 | M | South Wes A Level or I  | 0 | 90  | N | Fail        |
| 604427 | M | Sidamo Re A Level or I  | 0 | 150 | N | Pass        |
| 604449 | M | Oromia Re Lower Tha     | 0 | 60  | N | Withdrawn   |
| 604478 | M | North Regi Lower Tha    | 0 | 120 | N | Pass        |
| 604514 | M | Afar Regio A Level or I | 0 | 90  | N | Fail        |
| 604581 | F | Amhara Re A Level or I  | 0 | 90  | N | Fail        |
| 604583 | M | Afar Regio A Level or I | 0 | 60  | N | Withdrawn   |
| 604606 | M | Sidamo Re Lower Tha     | 0 | 60  | N | Withdrawn   |
| 604619 | F | Sidamo Re Lower Tha     | 0 | 60  | N | Withdrawn   |
| 604633 | M | Addis Abak A Level or I | 0 | 120 | N | Pass        |
| 604635 | M | Afar Regio A Level or I | 0 | 60  | N | Pass        |
| 604700 | F | Afar Regio HE Qualific  | 0 | 60  | N | Distinction |
| 604741 | M | Somalia Re A Level or I | 0 | 150 | N | Pass        |
| 604755 | M | Addis Abak A Level or I | 0 | 120 | N | Pass        |
| 604766 | M | Sidamo Re A Level or I  | 0 | 60  | N | Distinction |
| 604799 | M | South Regi Lower Tha    | 0 | 120 | N | Pass        |
| 604817 | M | South Wes Lower Tha     | 0 | 60  | Y | Fail        |
| 604828 | M | Afar Regio A Level or I | 0 | 60  | N | Fail        |
| 604879 | F | South Wes HE Qualific   | 0 | 120 | N | Distinction |
| 604889 | F | Somalia Re A Level or I | 0 | 120 | N | Withdrawn   |
| 604918 | M | Afar Regio A Level or I | 0 | 60  | N | Fail        |
| 604945 | M | Afar Regio HE Qualific  | 0 | 60  | N | Fail        |
| 604946 | M | Sidamo Re HE Qualific   | 0 | 120 | N | Withdrawn   |
| 605012 | M | Sidamo Re A Level or I  | 0 | 120 | N | Pass        |
| 605048 | M | North Regi HE Qualific  | 0 | 60  | N | Pass        |
| 605069 | M | Afar Regio Lower Tha    | 0 | 60  | N | Pass        |
| 605091 | M | Oromia Re No Formal     | 0 | 150 | N | Withdrawn   |
| 605108 | M | Addis Abak Lower Tha    | 0 | 60  | N | Withdrawn   |
| 605145 | M | Sidamo Re A Level or I  | 0 | 60  | N | Withdrawn   |
| 605195 | M | Afar Regio HE Qualific  | 0 | 90  | N | Distinction |
| 605228 | F | Sidamo Re Lower Tha     | 0 | 240 | N | Withdrawn   |
| 605265 | F | North Regi HE Qualific  | 0 | 60  | N | Pass        |
| 605269 | M | South Regi A Level or I | 0 | 120 | N | Withdrawn   |
| 605372 | M | Somalia Re Lower Tha    | 0 | 60  | N | Fail        |
| 605394 | M | Amhara Re A Level or I  | 0 | 120 | N | Fail        |
| 605409 | F | Afar Regio A Level or I | 0 | 60  | N | Distinction |
| 605459 | M | South Wes Lower Tha     | 0 | 60  | N | Pass        |
| 605538 | M | South Regi Lower Tha    | 0 | 120 | N | Pass        |
| 605571 | F | Afar Regio HE Qualific  | 0 | 90  | N | Distinction |

|        |   |                          |   |     |   |             |
|--------|---|--------------------------|---|-----|---|-------------|
| 605589 | M | Afar Region HE Qualific  | 0 | 120 | N | Pass        |
| 605598 | F | South Regi A Level or I  | 0 | 120 | N | Pass        |
| 605621 | M | South Wes A Level or I   | 0 | 120 | N | Pass        |
| 605666 | M | Somalia Re HE Qualific   | 0 | 60  | N | Pass        |
| 605756 | M | Oromia Re Lower Than     | 0 | 120 | N | Pass        |
| 605886 | F | South Wes A Level or I   | 0 | 60  | N | Fail        |
| 605905 | M | Oromia Re A Level or I   | 0 | 120 | N | Fail        |
| 605921 | M | South Wes A Level or I   | 0 | 60  | N | Fail        |
| 605940 | M | Addis Abak Lower Than    | 0 | 90  | N | Withdrawn   |
| 605954 | M | Sidamo Re, Lower Than    | 0 | 60  | N | Fail        |
| 605974 | M | North Regi HE Qualific   | 0 | 180 | N | Pass        |
| 605988 | M | Afar Region HE Qualific  | 0 | 60  | N | Pass        |
| 605993 | M | South Regi Lower Than    | 0 | 90  | N | Fail        |
| 606002 | F | South Regi A Level or I  | 0 | 60  | N | Pass        |
| 606006 | M | North Regi HE Qualific   | 0 | 60  | N | Withdrawn   |
| 606062 | M | Sidamo Re, A Level or I  | 0 | 60  | N | Pass        |
| 606079 | M | Sidamo Re, A Level or I  | 0 | 120 | N | Fail        |
| 606104 | F | North Regi HE Qualific   | 0 | 60  | N | Distinction |
| 606167 | M | South Regi A Level or I  | 0 | 60  | N | Pass        |
| 606189 | F | Amhara Re Lower Than     | 0 | 60  | N | Withdrawn   |
| 606304 | M | South Wes Lower Than     | 0 | 120 | N | Pass        |
| 606369 | M | Sidamo Re, Lower Than    | 0 | 60  | N | Withdrawn   |
| 606386 | M | South Wes Lower Than     | 0 | 120 | N | Fail        |
| 606407 | M | Sidamo Re, A Level or I  | 0 | 120 | N | Withdrawn   |
| 606425 | M | Amhara Re Lower Than     | 0 | 60  | N | Withdrawn   |
| 606428 | M | North Regi A Level or I  | 0 | 60  | N | Withdrawn   |
| 606436 | M | South Regi A Level or I  | 0 | 60  | N | Withdrawn   |
| 606444 | F | Amhara Re Lower Than     | 0 | 90  | N | Distinction |
| 606459 | M | South Wes Lower Than     | 0 | 90  | N | Withdrawn   |
| 606496 | M | Afar Region Post Gradu   | 0 | 90  | N | Fail        |
| 606612 | M | Afar Region Lower Than   | 0 | 60  | N | Withdrawn   |
| 606711 | M | South Wes A Level or I   | 0 | 60  | N | Pass        |
| 606712 | M | North Regi Lower Than    | 0 | 60  | N | Pass        |
| 606817 | M | Oromia Re Lower Than     | 0 | 60  | N | Fail        |
| 606835 | M | South Wes Lower Than     | 0 | 120 | N | Pass        |
| 606903 | F | Oromia Re HE Qualific    | 0 | 60  | N | Pass        |
| 606911 | M | South Wes Lower Than     | 0 | 150 | N | Withdrawn   |
| 606930 | M | South Regi Lower Than    | 0 | 90  | N | Withdrawn   |
| 606939 | M | Sidamo Re, HE Qualific   | 0 | 90  | N | Pass        |
| 606966 | M | Afar Region HE Qualific  | 0 | 60  | N | Fail        |
| 606967 | M | Afar Region A Level or I | 0 | 150 | N | Withdrawn   |
| 606990 | M | Sidamo Re, Lower Than    | 0 | 60  | N | Pass        |
| 606998 | M | Sidamo Re, Lower Than    | 0 | 120 | N | Fail        |
| 607011 | M | Addis Abak A Level or I  | 0 | 60  | N | Fail        |
| 607047 | M | Afar Region Post Gradu   | 0 | 60  | N | Pass        |
| 607052 | M | Somalia Re A Level or I  | 0 | 90  | N | Pass        |
| 607068 | F | Afar Region HE Qualific  | 0 | 60  | N | Withdrawn   |

|        |   |                          |   |     |   |             |
|--------|---|--------------------------|---|-----|---|-------------|
| 607118 | M | Addis Abat A Level or I  | 0 | 60  | N | Pass        |
| 607134 | M | Sidamo Re Lower Than     | 0 | 90  | N | Fail        |
| 607135 | M | Sidamo Re Lower Than     | 0 | 90  | N | Fail        |
| 607200 | M | Sidamo Re HE Qualific    | 0 | 60  | N | Fail        |
| 607247 | F | Afar Region HE Qualific  | 0 | 60  | N | Distinction |
| 607407 | F | Amhara Re A Level or I   | 0 | 120 | N | Withdrawn   |
| 607473 | M | Somalia Re Lower Than    | 0 | 90  | N | Withdrawn   |
| 607533 | F | South Wes Lower Than     | 0 | 90  | N | Withdrawn   |
| 607538 | M | South Wes Lower Than     | 0 | 60  | N | Pass        |
| 607577 | M | Afar Region No Formal    | 0 | 90  | N | Fail        |
| 607586 | M | Sidamo Re A Level or I   | 0 | 60  | N | Fail        |
| 607613 | M | South Regi HE Qualific   | 0 | 120 | N | Withdrawn   |
| 607629 | M | Amhara Re A Level or I   | 0 | 60  | N | Withdrawn   |
| 607650 | M | Afar Region A Level or I | 0 | 90  | N | Pass        |
| 607696 | M | South Regi A Level or I  | 0 | 150 | N | Fail        |
| 607794 | M | South Regi A Level or I  | 0 | 150 | N | Distinction |
| 607866 | M | South Regi Lower Than    | 0 | 60  | Y | Withdrawn   |
| 607938 | M | Addis Abat A Level or I  | 0 | 120 | N | Pass        |
| 607979 | M | North Regi A Level or I  | 0 | 60  | N | Distinction |
| 608008 | F | North Regi A Level or I  | 0 | 120 | N | Pass        |
| 608043 | M | Oromia Re HE Qualific    | 0 | 60  | N | Pass        |
| 608111 | M | Sidamo Re HE Qualific    | 0 | 180 | N | Withdrawn   |
| 608144 | M | North Regi A Level or I  | 0 | 90  | Y | Distinction |
| 608169 | M | Tigrai Regi HE Qualific  | 0 | 90  | N | Fail        |
| 608196 | F | Addis Abat Lower Than    | 0 | 60  | N | Fail        |
| 608198 | F | Amhara Re Lower Than     | 0 | 90  | N | Fail        |
| 608211 | M | Amhara Re No Formal      | 0 | 60  | N | Withdrawn   |
| 608231 | M | South Regi HE Qualific   | 0 | 120 | N | Pass        |
| 608248 | M | Sidamo Re A Level or I   | 0 | 90  | N | Withdrawn   |
| 608280 | M | Tigrai Regi Lower Than   | 0 | 120 | N | Fail        |
| 608348 | M | Sidamo Re A Level or I   | 0 | 60  | N | Withdrawn   |
| 608349 | M | South Regi Lower Than    | 0 | 180 | N | Pass        |
| 608356 | M | North Regi A Level or I  | 0 | 120 | N | Pass        |
| 608421 | M | Oromia Re Lower Than     | 0 | 60  | N | Distinction |
| 608422 | M | North Regi A Level or I  | 0 | 90  | N | Pass        |
| 608453 | M | South Wes A Level or I   | 0 | 120 | N | Withdrawn   |
| 608477 | M | Sidamo Re Lower Than     | 0 | 120 | N | Pass        |
| 608535 | M | Afar Region Lower Than   | 0 | 60  | N | Withdrawn   |
| 608606 | M | South Regi Lower Than    | 0 | 60  | N | Withdrawn   |
| 608681 | M | Amhara Re Lower Than     | 0 | 60  | Y | Pass        |
| 608698 | M | Addis Abat A Level or I  | 0 | 60  | N | Pass        |
| 608727 | M | North Regi A Level or I  | 0 | 120 | N | Withdrawn   |
| 608737 | M | Amhara Re A Level or I   | 0 | 90  | Y | Fail        |
| 608747 | M | Somalia Re A Level or I  | 0 | 60  | N | Pass        |
| 608753 | M | Somalia Re A Level or I  | 0 | 120 | N | Distinction |
| 608827 | M | Addis Abat A Level or I  | 0 | 120 | N | Pass        |
| 608864 | F | Afar Region Post Gradu   | 0 | 120 | N | Withdrawn   |

|        |   |                          |   |     |   |             |
|--------|---|--------------------------|---|-----|---|-------------|
| 608866 | F | South Regi A Level or I  | 0 | 120 | N | Withdrawn   |
| 608909 | F | Addis Abak A Level or I  | 0 | 60  | N | Pass        |
| 608913 | M | Addis Abak A Level or I  | 0 | 60  | N | Pass        |
| 608966 | M | Tigrai Regi A Level or I | 0 | 60  | N | Distinction |
| 608997 | M | Afar Regi Lower Than     | 0 | 90  | Y | Fail        |
| 609097 | F | Afar Regi HE Qualific    | 0 | 60  | N | Pass        |
| 609163 | M | Somalia Re A Level or I  | 0 | 60  | N | Withdrawn   |
| 609184 | M | Sidamo Re HE Qualific    | 0 | 90  | N | Fail        |
| 609220 | M | Oromia Re A Level or I   | 0 | 60  | N | Pass        |
| 609221 | M | Sidamo Re HE Qualific    | 0 | 120 | N | Pass        |
| 609229 | M | South Wes A Level or I   | 0 | 120 | N | Pass        |
| 609244 | M | Addis Abak A Level or I  | 0 | 60  | N | Fail        |
| 609277 | F | Addis Abak A Level or I  | 0 | 90  | Y | Distinction |
| 609367 | M | Amhara Re A Level or I   | 0 | 60  | N | Withdrawn   |
| 609396 | M | Afar Regi HE Qualific    | 0 | 60  | N | Withdrawn   |
| 609416 | M | Tigrai Regi HE Qualific  | 0 | 60  | N | Pass        |
| 609435 | M | South Regi HE Qualific   | 0 | 60  | N | Withdrawn   |
| 609439 | M | Oromia Re A Level or I   | 0 | 60  | N | Pass        |
| 609460 | M | North Regi Post Gradu    | 0 | 60  | N | Fail        |
| 609513 | M | North Regi A Level or I  | 0 | 60  | N | Fail        |
| 609537 | M | North Regi A Level or I  | 0 | 60  | N | Distinction |
| 609558 | M | Sidamo Re Lower Than     | 0 | 90  | N | Fail        |
| 609743 | M | Sidamo Re Lower Than     | 0 | 60  | N | Pass        |
| 609777 | F | Sidamo Re Lower Than     | 0 | 60  | N | Fail        |
| 609831 | M | South Wes Lower Than     | 0 | 60  | N | Fail        |
| 609882 | F | Sidamo Re HE Qualific    | 0 | 60  | N | Distinction |
| 609891 | M | South Regi A Level or I  | 0 | 240 | N | Withdrawn   |
| 609908 | M | Oromia Re Lower Than     | 0 | 60  | N | Pass        |
| 609985 | M | South Regi A Level or I  | 0 | 150 | N | Pass        |
| 610097 | M | North Regi HE Qualific   | 0 | 60  | N | Pass        |
| 610099 | M | South Regi A Level or I  | 0 | 120 | N | Pass        |
| 610172 | F | Somalia Re Lower Than    | 0 | 60  | N | Pass        |
| 610225 | F | Afar Regi HE Qualific    | 0 | 60  | N | Fail        |
| 610244 | M | Somalia Re Lower Than    | 0 | 60  | N | Pass        |
| 610258 | M | Amhara Re A Level or I   | 0 | 120 | N | Pass        |
| 610266 | M | South Regi Lower Than    | 0 | 90  | N | Pass        |
| 610278 | M | South Wes A Level or I   | 0 | 120 | N | Distinction |
| 610292 | F | Tigrai Regi HE Qualific  | 0 | 60  | N | Withdrawn   |
| 610312 | M | Amhara Re Lower Than     | 0 | 90  | N | Pass        |
| 610324 | M | Afar Regi HE Qualific    | 0 | 60  | N | Pass        |
| 610335 | M | South Wes Lower Than     | 0 | 60  | N | Withdrawn   |
| 610400 | M | South Regi A Level or I  | 0 | 60  | N | Fail        |
| 610455 | M | South Regi Lower Than    | 0 | 120 | N | Withdrawn   |
| 610517 | M | South Wes Lower Than     | 0 | 60  | Y | Fail        |
| 610577 | M | North Regi Lower Than    | 0 | 90  | N | Fail        |
| 610637 | F | Amhara Re A Level or I   | 0 | 60  | N | Pass        |
| 610643 | M | Oromia Re A Level or I   | 0 | 60  | N | Pass        |



|         |   |                          |   |     |   |             |
|---------|---|--------------------------|---|-----|---|-------------|
| 610687  | M | Afar Region Lower Tha    | 0 | 120 | N | Pass        |
| 610746  | M | North Regi HE Qualific   | 0 | 60  | N | Pass        |
| 610774  | M | South Wes Lower Tha      | 0 | 90  | N | Fail        |
| 610814  | M | Sidamo Re HE Qualific    | 0 | 60  | N | Fail        |
| 610831  | M | Addis Abak Lower Tha     | 0 | 120 | N | Withdrawn   |
| 610932  | M | Sidamo Re Lower Tha      | 0 | 60  | N | Fail        |
| 610933  | M | South Regi A Level or I  | 0 | 60  | N | Pass        |
| 611039  | M | South Wes Lower Tha      | 0 | 60  | N | Pass        |
| 611126  | M | South Regi Lower Tha     | 0 | 120 | N | Fail        |
| 611213  | M | Somalia Re HE Qualific   | 0 | 60  | N | Withdrawn   |
| 611226  | M | South Regi HE Qualific   | 0 | 60  | N | Distinction |
| 611245  | M | Tigrai Regi Lower Tha    | 0 | 240 | N | Withdrawn   |
| 611309  | M | Sidamo Re Lower Tha      | 0 | 90  | N | Fail        |
| 611396  | M | South Wes HE Qualific    | 0 | 90  | N | Pass        |
| 898594  | F | South Regi HE Qualific   | 0 | 60  | N | Pass        |
| 973364  | M | Sidamo Re HE Qualific    | 0 | 60  | N | Withdrawn   |
| 984347  | M | Sidamo Re A Level or I   | 0 | 60  | N | Distinction |
| 985062  | M | South Wes HE Qualific    | 0 | 120 | N | Pass        |
| 988019  | F | Sidamo Re A Level or I   | 1 | 60  | Y | Fail        |
| 990155  | M | South Regi HE Qualific   | 0 | 90  | N | Distinction |
| 1064492 | M | South Regi HE Qualific   | 0 | 120 | N | Distinction |
| 1065824 | M | Tigrai Regi HE Qualific  | 0 | 150 | N | Distinction |
| 1100143 | M | South Wes A Level or I   | 0 | 120 | N | Distinction |
| 1107596 | M | Tigrai Regi HE Qualific  | 0 | 60  | N | Withdrawn   |
| 1253440 | M | Amhara Re Lower Tha      | 0 | 60  | Y | Fail        |
| 1319999 | M | Amhara Re HE Qualific    | 0 | 90  | N | Pass        |
| 1359554 | M | Somalia Re A Level or I  | 0 | 60  | N | Pass        |
| 1390051 | M | Addis Abak HE Qualific   | 0 | 60  | N | Fail        |
| 1397617 | M | South Wes Lower Tha      | 0 | 180 | N | Distinction |
| 1399314 | M | Afar Region Lower Tha    | 1 | 60  | N | Fail        |
| 1417707 | F | South Wes Lower Tha      | 1 | 60  | N | Pass        |
| 1420537 | M | South Regi HE Qualific   | 0 | 60  | N | Pass        |
| 1428865 | M | Afar Region HE Qualific  | 1 | 60  | N | Withdrawn   |
| 1455474 | M | Tigrai Regi Lower Tha    | 0 | 60  | N | Fail        |
| 1482413 | M | Addis Abak A Level or I  | 0 | 60  | N | Withdrawn   |
| 1492571 | M | South Wes A Level or I   | 0 | 60  | N | Pass        |
| 1494577 | M | South Regi A Level or I  | 0 | 120 | N | Pass        |
| 1504653 | M | Addis Abak Lower Tha     | 0 | 60  | Y | Pass        |
| 1512332 | M | Afar Region A Level or I | 0 | 60  | N | Withdrawn   |
| 1513001 | M | Afar Region HE Qualific  | 0 | 90  | N | Pass        |
| 1515509 | M | Somalia Re Lower Tha     | 0 | 90  | N | Pass        |
| 1527616 | F | Sidamo Re HE Qualific    | 0 | 60  | N | Fail        |
| 1532921 | M | Addis Abak A Level or I  | 0 | 60  | N | Withdrawn   |
| 1541472 | M | South Regi HE Qualific   | 0 | 60  | N | Pass        |
| 1559959 | M | South Regi Lower Tha     | 1 | 60  | N | Withdrawn   |
| 1559964 | M | Addis Abak Lower Tha     | 0 | 60  | N | Distinction |
| 1621041 | M | Tigrai Regi Lower Tha    | 0 | 60  | N | Withdrawn   |

|         |   |                          |   |     |   |             |
|---------|---|--------------------------|---|-----|---|-------------|
| 1634278 | M | Sidamo Re Lower Tha      | 0 | 60  | N | Pass        |
| 1636725 | M | Afar Regio HE Qualific   | 0 | 60  | N | Pass        |
| 1641344 | M | Afar Regio A Level or I  | 0 | 60  | N | Pass        |
| 1644647 | M | Amhara Re A Level or I   | 0 | 60  | N | Distinction |
| 1678617 | F | Afar Regio HE Qualific   | 0 | 90  | N | Withdrawn   |
| 1694120 | M | Oromia Re HE Qualific    | 0 | 90  | N | Pass        |
| 1759799 | M | Sidamo Re A Level or I   | 0 | 60  | N | Pass        |
| 1763186 | M | North Regi Lower Tha     | 0 | 120 | N | Withdrawn   |
| 1852968 | F | Oromia Re HE Qualific    | 0 | 60  | N | Distinction |
| 1859038 | M | South Wes A Level or I   | 0 | 270 | N | Pass        |
| 1859407 | M | South Wes Lower Tha      | 0 | 120 | Y | Withdrawn   |
| 1864086 | M | Afar Regio A Level or I  | 0 | 60  | Y | Pass        |
| 1866233 | M | Somalia Re A Level or I  | 0 | 60  | Y | Withdrawn   |
| 1876636 | F | South Wes A Level or I   | 0 | 120 | N | Pass        |
| 1891977 | M | Addis Abak Lower Tha     | 0 | 120 | N | Withdrawn   |
| 1902283 | M | Addis Abak HE Qualific   | 0 | 60  | N | Withdrawn   |
| 1910049 | F | Somalia Re A Level or I  | 1 | 120 | N | Pass        |
| 1910111 | F | Amhara Re A Level or I   | 0 | 240 | N | Withdrawn   |
| 1913166 | M | Sidamo Re HE Qualific    | 0 | 60  | N | Distinction |
| 1917335 | F | South Wes A Level or I   | 0 | 100 | N | Pass        |
| 1929219 | M | South Regi HE Qualific   | 0 | 60  | N | Withdrawn   |
| 1931370 | M | Amhara Re Lower Tha      | 0 | 60  | N | Withdrawn   |
| 1935735 | M | Sidamo Re A Level or I   | 0 | 360 | N | Fail        |
| 1941149 | M | Amhara Re Lower Tha      | 0 | 120 | N | Withdrawn   |
| 1943681 | F | Afar Regio A Level or I  | 0 | 75  | N | Withdrawn   |
| 1945945 | M | Sidamo Re Lower Tha      | 0 | 60  | N | Pass        |
| 1948159 | F | North Regi A Level or I  | 0 | 60  | N | Withdrawn   |
| 1949484 | M | Sidamo Re HE Qualific    | 0 | 90  | N | Fail        |
| 1950923 | M | Amhara Re Lower Tha      | 0 | 60  | N | Pass        |
| 1951127 | M | Amhara Re Lower Tha      | 0 | 150 | N | Distinction |
| 1954147 | M | Tigrai Regi Lower Tha    | 0 | 60  | N | Pass        |
| 1962128 | F | Afar Regio A Level or I  | 0 | 120 | N | Withdrawn   |
| 1978492 | M | South Regi Lower Tha     | 0 | 120 | N | Withdrawn   |
| 1980822 | F | Afar Regio Lower Tha     | 1 | 60  | N | Pass        |
| 1981053 | M | Somalia Re A Level or I  | 0 | 120 | Y | Withdrawn   |
| 1982166 | M | South Regi A Level or I  | 0 | 60  | N | Distinction |
| 1983331 | M | Amhara Re HE Qualific    | 0 | 60  | N | Withdrawn   |
| 1983921 | M | Amhara Re A Level or I   | 0 | 120 | N | Pass        |
| 1992145 | M | Afar Regio A Level or I  | 1 | 90  | N | Pass        |
| 2053381 | M | Tigrai Regi A Level or I | 0 | 90  | N | Fail        |
| 2056416 | M | South Regi Lower Tha     | 0 | 120 | N | Distinction |
| 2056486 | M | Addis Abak Lower Tha     | 0 | 60  | N | Pass        |
| 2071595 | M | Afar Regio Lower Tha     | 0 | 60  | N | Fail        |
| 2088982 | M | South Regi A Level or I  | 1 | 60  | N | Withdrawn   |
| 2104123 | M | Afar Regio A Level or I  | 0 | 90  | N | Pass        |
| 2105230 | M | Amhara Re HE Qualific    | 0 | 120 | N | Fail        |
| 2112291 | M | Oromia Re A Level or I   | 0 | 120 | Y | Fail        |

|         |   |                         |   |     |   |             |
|---------|---|-------------------------|---|-----|---|-------------|
| 2128283 | M | Oromia Re HE Qualific   | 0 | 90  | N | Withdrawn   |
| 2137171 | M | Addis Abak HE Qualific  | 0 | 60  | N | Pass        |
| 2143739 | M | Amhara Re Lower Thar    | 0 | 180 | N | Pass        |
| 2145940 | M | Amhara Re Lower Thar    | 0 | 120 | N | Pass        |
| 2146277 | F | Addis Abak A Level or I | 0 | 90  | N | Distinction |
| 2148540 | F | Sidamo Re Lower Thar    | 0 | 60  | N | Pass        |
| 2149735 | F | Somalia Re A Level or I | 0 | 90  | N | Pass        |
| 2162410 | F | Oromia Re HE Qualific   | 0 | 60  | N | Distinction |
| 2170320 | M | Amhara Re Lower Thar    | 0 | 60  | N | Fail        |
| 2173721 | F | Afar Regio Lower Thar   | 2 | 90  | N | Fail        |
| 2177720 | M | Amhara Re A Level or I  | 0 | 60  | N | Fail        |
| 2178466 | M | South Regi A Level or I | 0 | 60  | N | Fail        |
| 2180710 | M | Tigrai Regio Lower Thar | 0 | 60  | N | Fail        |
| 2182333 | M | South Wes A Level or I  | 0 | 60  | N | Distinction |
| 2188084 | M | Oromia Re A Level or I  | 0 | 90  | N | Fail        |
| 2191588 | M | Tigrai Regio Lower Thar | 0 | 60  | N | Fail        |
| 2193185 | M | South Regi A Level or I | 0 | 180 | N | Pass        |
| 2195853 | F | North Regi A Level or I | 2 | 180 | N | Fail        |
| 2197175 | F | Addis Abak A Level or I | 0 | 90  | N | Pass        |
| 2218693 | M | South Wes Lower Thar    | 0 | 120 | Y | Pass        |
| 2226620 | M | Afar Regio HE Qualific  | 0 | 145 | N | Fail        |
| 2237223 | F | Sidamo Re HE Qualific   | 0 | 60  | N | Fail        |
| 2238148 | M | Afar Regio A Level or I | 0 | 60  | Y | Distinction |
| 2238424 | M | Afar Regio Lower Thar   | 0 | 60  | N | Withdrawn   |
| 2239746 | M | Addis Abak Lower Thar   | 1 | 120 | Y | Pass        |
| 2243505 | M | South Regi A Level or I | 0 | 90  | N | Pass        |
| 2250842 | F | Addis Abak Lower Thar   | 0 | 60  | N | Distinction |
| 2252765 | F | Afar Regio HE Qualific  | 0 | 60  | N | Distinction |
| 2261138 | M | South Regi Lower Thar   | 0 | 60  | N | Withdrawn   |
| 2286312 | M | South Wes HE Qualific   | 0 | 60  | N | Pass        |
| 2286574 | M | Sidamo Re A Level or I  | 0 | 60  | N | Fail        |
| 2290267 | M | North Regi Lower Thar   | 1 | 120 | N | Pass        |
| 2290883 | M | North Regi HE Qualific  | 0 | 60  | N | Pass        |
| 2292047 | M | South Regi A Level or I | 1 | 120 | N | Withdrawn   |
| 2298402 | M | Oromia Re Lower Thar    | 0 | 90  | N | Withdrawn   |
| 2299682 | M | South Regi A Level or I | 0 | 120 | N | Withdrawn   |
| 2304417 | M | Afar Regio HE Qualific  | 0 | 70  | N | Pass        |
| 2305237 | M | South Wes HE Qualific   | 2 | 150 | N | Withdrawn   |
| 2312279 | M | South Regi Lower Thar   | 0 | 60  | N | Pass        |
| 2323944 | M | South Regi A Level or I | 0 | 90  | Y | Pass        |
| 2326475 | M | South Regi A Level or I | 0 | 60  | N | Pass        |
| 2337889 | M | South Regi A Level or I | 1 | 60  | Y | Pass        |
| 2340746 | M | South Wes Lower Thar    | 0 | 90  | Y | Pass        |
| 2343337 | M | Afar Regio Lower Thar   | 0 | 90  | N | Distinction |
| 2344957 | M | South Regi Lower Thar   | 1 | 60  | Y | Pass        |
| 2345900 | F | South Wes A Level or I  | 0 | 60  | N | Distinction |
| 2356049 | F | South Regi Lower Thar   | 0 | 60  | N | Withdrawn   |

|         |   |                          |   |     |   |             |
|---------|---|--------------------------|---|-----|---|-------------|
| 2356196 | M | Afar Region HE Qualific  | 0 | 90  | N | Fail        |
| 2357629 | M | Sidamo Re Lower Thar     | 0 | 60  | Y | Distinction |
| 2360322 | M | South Regi A Level or I  | 0 | 120 | N | Pass        |
| 2364160 | M | Oromia Re A Level or I   | 0 | 210 | N | Pass        |
| 2364905 | M | Amhara Re Lower Thar     | 1 | 60  | N | Fail        |
| 2366574 | M | Somalia Re Lower Thar    | 0 | 90  | N | Withdrawn   |
| 2372788 | M | Sidamo Re Lower Thar     | 0 | 60  | N | Distinction |
| 2374002 | F | Addis Abak HE Qualific   | 0 | 60  | N | Distinction |
| 2379512 | M | Addis Abak A Level or I  | 0 | 60  | N | Pass        |
| 2380602 | M | Amhara Re Lower Thar     | 1 | 60  | N | Withdrawn   |
| 2382965 | M | North Regi A Level or I  | 1 | 120 | N | Withdrawn   |
| 2383169 | M | Somalia Re Lower Thar    | 0 | 60  | N | Withdrawn   |
| 2383780 | M | Sidamo Re Lower Thar     | 2 | 60  | N | Fail        |
| 2387725 | M | Tigrai Regi A Level or I | 0 | 120 | N | Withdrawn   |
| 2389837 | M | South Regi A Level or I  | 1 | 60  | N | Withdrawn   |
| 2390547 | F | Amhara Re Lower Thar     | 0 | 240 | N | Withdrawn   |
| 2393230 | M | Amhara Re Lower Thar     | 0 | 60  | Y | Pass        |
| 2393261 | M | Amhara Re Lower Thar     | 0 | 60  | N | Pass        |
| 2396381 | M | Sidamo Re A Level or I   | 0 | 120 | N | Pass        |
| 2410687 | M | Tigrai Regi HE Qualific  | 0 | 60  | N | Withdrawn   |
| 2411773 | M | Tigrai Regi A Level or I | 0 | 60  | N | Pass        |
| 2412152 | F | South Regi A Level or I  | 0 | 60  | N | Pass        |
| 2414552 | F | Afar Region Lower Thar   | 0 | 60  | N | Withdrawn   |
| 2415436 | M | South Wes A Level or I   | 0 | 150 | N | Pass        |
| 2417433 | M | Tigrai Regi A Level or I | 2 | 90  | N | Withdrawn   |
| 2423002 | M | Addis Abak Lower Thar    | 0 | 90  | N | Pass        |
| 2435795 | M | Tigrai Regi HE Qualific  | 0 | 60  | N | Pass        |
| 2437051 | M | South Wes A Level or I   | 0 | 60  | N | Withdrawn   |
| 2440301 | F | South Regi A Level or I  | 0 | 60  | N | Pass        |
| 2445085 | M | South Regi Lower Thar    | 0 | 210 | Y | Pass        |
| 2447469 | M | Somalia Re HE Qualific   | 0 | 60  | N | Withdrawn   |
| 2449737 | F | Addis Abak Lower Thar    | 0 | 120 | Y | Withdrawn   |
| 2449819 | M | Addis Abak A Level or I  | 0 | 60  | N | Pass        |
| 2452606 | M | South Wes HE Qualific    | 1 | 90  | N | Pass        |
| 2454653 | F | Addis Abak Lower Thar    | 0 | 150 | N | Pass        |
| 2454878 | F | South Regi Lower Thar    | 0 | 90  | Y | Pass        |
| 2463282 | M | South Wes Lower Thar     | 0 | 240 | Y | Withdrawn   |
| 2465105 | F | South Regi A Level or I  | 0 | 60  | N | Fail        |
| 2465589 | M | Somalia Re Lower Thar    | 0 | 195 | N | Pass        |
| 2468232 | M | South Regi HE Qualific   | 1 | 120 | Y | Withdrawn   |
| 2469321 | F | Addis Abak A Level or I  | 0 | 120 | N | Pass        |
| 2469688 | M | Sidamo Re A Level or I   | 0 | 60  | N | Pass        |
| 2471302 | F | Oromia Re Lower Thar     | 0 | 120 | N | Withdrawn   |
| 2472033 | M | Somalia Re A Level or I  | 1 | 210 | N | Pass        |
| 2472132 | M | North Regi HE Qualific   | 0 | 60  | N | Pass        |
| 2487982 | M | Oromia Re HE Qualific    | 4 | 60  | N | Pass        |
| 2499949 | M | Sidamo Re Lower Thar     | 0 | 210 | N | Withdrawn   |

|         |   |                            |   |     |   |             |
|---------|---|----------------------------|---|-----|---|-------------|
| 2500149 | M | Afar Region Lower Than     | 0 | 90  | N | Pass        |
| 2503063 | M | Somalia Region A Level or  | 0 | 90  | N | Pass        |
| 2523035 | M | North Region A Level or    | 0 | 90  | N | Pass        |
| 2523751 | M | Sidamo Region A Level or   | 0 | 60  | N | Withdrawn   |
| 2524572 | M | Oromia Region A Level or   | 0 | 90  | Y | Withdrawn   |
| 2526537 | F | Sidamo Region Lower Than   | 0 | 60  | N | Withdrawn   |
| 2534165 | M | Oromia Region HE Qualific  | 1 | 120 | N | Pass        |
| 2539666 | M | South West Lower Than      | 0 | 60  | Y | Fail        |
| 2540424 | M | Somalia Region A Level or  | 0 | 120 | N | Withdrawn   |
| 2542431 | M | Somalia Region A Level or  | 0 | 90  | N | Pass        |
| 2543208 | M | Sidamo Region Lower Than   | 0 | 60  | N | Pass        |
| 2545923 | M | South West HE Qualific     | 0 | 90  | N | Distinction |
| 2548055 | M | Afar Region Lower Than     | 0 | 60  | N | Pass        |
| 2555225 | M | Sidamo Region A Level or   | 0 | 60  | N | Pass        |
| 2555893 | F | South Region Lower Than    | 0 | 180 | N | Withdrawn   |
| 2558713 | F | Oromia Region A Level or   | 0 | 210 | N | Fail        |
| 2563095 | M | South Region HE Qualific   | 0 | 60  | N | Withdrawn   |
| 2567571 | F | Afar Region HE Qualific    | 0 | 60  | N | Pass        |
| 2572441 | M | South Region A Level or    | 0 | 150 | Y | Pass        |
| 2579401 | M | South Region Lower Than    | 0 | 60  | N | Pass        |
| 2580196 | M | South Region HE Qualific   | 0 | 120 | N | Fail        |
| 2580545 | M | Amhara Region Lower Than   | 2 | 60  | N | Pass        |
| 2586313 | M | Somalia Region HE Qualific | 0 | 60  | N | Withdrawn   |
| 2588467 | M | South Region Lower Than    | 0 | 60  | Y | Fail        |
| 2595641 | M | South West A Level or      | 0 | 120 | N | Pass        |
| 2596621 | M | South West A Level or      | 0 | 60  | N | Distinction |
| 2602264 | M | Sidamo Region Post Gradu   | 0 | 150 | N | Distinction |
| 2610837 | M | Sidamo Region HE Qualific  | 2 | 60  | N | Withdrawn   |
| 2611986 | M | Afar Region A Level or     | 0 | 60  | N | Fail        |
| 2613746 | M | Afar Region A Level or     | 0 | 60  | N | Pass        |
| 2614277 | F | Afar Region HE Qualific    | 0 | 140 | N | Pass        |
| 2619184 | M | South Region A Level or    | 0 | 60  | N | Withdrawn   |
| 2621734 | M | Sidamo Region A Level or   | 0 | 120 | N | Fail        |
| 2622634 | M | South West A Level or      | 0 | 60  | N | Withdrawn   |
| 2623496 | M | South Region HE Qualific   | 0 | 180 | N | Pass        |
| 2625545 | M | South Region HE Qualific   | 0 | 60  | N | Fail        |
| 2630284 | F | Somalia Region A Level or  | 4 | 180 | N | Withdrawn   |
| 2633052 | M | South Region Lower Than    | 0 | 60  | N | Fail        |
| 2634868 | M | Amhara Region HE Qualific  | 0 | 90  | N | Distinction |
| 2637239 | M | Tigray Region Lower Than   | 0 | 60  | N | Withdrawn   |
| 2639319 | F | Afar Region HE Qualific    | 0 | 60  | N | Pass        |
| 2641236 | F | Tigray Region Lower Than   | 0 | 60  | N | Withdrawn   |
| 2642994 | M | South Region A Level or    | 2 | 120 | N | Withdrawn   |
| 2650555 | M | North Region Lower Than    | 1 | 60  | N | Pass        |
| 2655370 | M | Sidamo Region HE Qualific  | 0 | 240 | N | Pass        |
| 2657185 | F | Oromia Region A Level or   | 0 | 60  | N | Withdrawn   |
| 2663131 | M | Sidamo Region HE Qualific  | 0 | 90  | N | Pass        |

|         |   |                          |   |     |   |             |
|---------|---|--------------------------|---|-----|---|-------------|
| 2672155 | M | South Regi Lower Tha     | 1 | 60  | N | Withdrawn   |
| 2678373 | M | Sidamo Re No Formal      | 0 | 120 | N | Withdrawn   |
| 2678993 | M | Afar Regio HE Qualific   | 0 | 60  | N | Withdrawn   |
| 2680380 | M | Addis Abak Lower Tha     | 1 | 60  | N | Pass        |
| 2683857 | M | South Wes Lower Tha      | 0 | 60  | N | Withdrawn   |
| 2686536 | M | South Wes Lower Tha      | 0 | 90  | N | Pass        |
| 2686609 | M | South Wes A Level or I   | 1 | 60  | Y | Pass        |
| 2687045 | M | South Wes Lower Tha      | 1 | 60  | N | Withdrawn   |
| 2687176 | M | South Regi A Level or I  | 0 | 60  | N | Fail        |
| 2687989 | M | South Wes A Level or I   | 0 | 60  | N | Pass        |
| 2688202 | F | Somalia Re Lower Tha     | 2 | 60  | N | Withdrawn   |
| 2692632 | M | Addis Abak Lower Tha     | 0 | 120 | N | Withdrawn   |
| 2694680 | M | Somalia Re Lower Tha     | 1 | 90  | N | Fail        |
| 2697608 | M | Sidamo Re No Formal      | 0 | 60  | N | Withdrawn   |
| 2697921 | M | Addis Abak Lower Tha     | 0 | 120 | N | Fail        |
| 2698125 | M | North Regi Lower Tha     | 0 | 60  | N | Pass        |
| 26211   | F | Sidamo Re HE Qualific    | 0 | 90  | N | Pass        |
| 26269   | M | Sidamo Re Lower Tha      | 0 | 60  | N | Withdrawn   |
| 27189   | F | South Regi Lower Tha     | 0 | 120 | N | Fail        |
| 27683   | M | Sidamo Re HE Qualific    | 0 | 60  | N | Pass        |
| 28808   | F | South Regi A Level or I  | 0 | 60  | N | Fail        |
| 28897   | M | South Wes A Level or I   | 0 | 120 | N | Distinction |
| 30531   | M | Addis Abak Lower Tha     | 1 | 180 | N | Fail        |
| 33600   | F | Sidamo Re A Level or I   | 1 | 150 | N | Withdrawn   |
| 34293   | M | South Regi Lower Tha     | 0 | 60  | Y | Withdrawn   |
| 36347   | M | Amhara Re Lower Tha      | 0 | 120 | N | Pass        |
| 39882   | F | Afar Regio A Level or I  | 1 | 120 | N | Pass        |
| 41489   | F | Addis Abak Lower Tha     | 0 | 60  | N | Fail        |
| 42746   | F | South Regi HE Qualific   | 0 | 60  | N | Distinction |
| 46148   | M | Amhara Re A Level or I   | 0 | 60  | N | Pass        |
| 48635   | M | South Regi HE Qualific   | 0 | 60  | N | Pass        |
| 53136   | F | Sidamo Re A Level or I   | 1 | 120 | N | Pass        |
| 53709   | M | Tigrai Regi A Level or I | 1 | 60  | N | Pass        |
| 54867   | F | South Wes Lower Tha      | 0 | 120 | N | Fail        |
| 58221   | M | Somalia Re Lower Tha     | 0 | 120 | N | Withdrawn   |
| 63958   | M | South Regi Lower Tha     | 0 | 60  | N | Fail        |
| 67986   | F | Afar Regio Lower Tha     | 0 | 60  | N | Withdrawn   |
| 72114   | M | North Regi A Level or I  | 1 | 120 | Y | Pass        |
| 74521   | M | North Regi HE Qualific   | 0 | 120 | N | Pass        |
| 74524   | F | Somalia Re Lower Tha     | 0 | 120 | Y | Fail        |
| 77845   | M | Somalia Re A Level or I  | 0 | 120 | N | Fail        |
| 77998   | M | South Wes Lower Tha      | 2 | 90  | N | Pass        |
| 79683   | M | Tigrai Regi A Level or I | 0 | 60  | Y | Withdrawn   |
| 81216   | M | South Regi Lower Tha     | 0 | 60  | N | Withdrawn   |
| 82201   | F | Sidamo Re Lower Tha      | 0 | 60  | N | Withdrawn   |
| 83603   | M | Sidamo Re A Level or I   | 0 | 60  | N | Pass        |
| 84299   | M | Sidamo Re A Level or I   | 0 | 120 | N | Pass        |

|        |   |                             |   |     |   |             |
|--------|---|-----------------------------|---|-----|---|-------------|
| 85874  | F | Afar Region HE Qualific     | 0 | 60  | N | Withdrawn   |
| 99670  | F | Amhara Region Lower Than    | 0 | 90  | N | Fail        |
| 101634 | M | Sidamo Region No Formal     | 0 | 90  | N | Fail        |
| 104316 | M | Sidamo Region A Level or I  | 0 | 60  | N | Fail        |
| 106747 | M | Amhara Region Lower Than    | 1 | 180 | Y | Withdrawn   |
| 108207 | M | South Region No Formal      | 0 | 120 | N | Pass        |
| 108822 | M | South Region Lower Than     | 0 | 60  | N | Distinction |
| 108949 | M | Amhara Region Lower Than    | 1 | 120 | N | Withdrawn   |
| 110529 | M | Afar Region Lower Than      | 0 | 60  | N | Withdrawn   |
| 115875 | F | Sidamo Region A Level or I  | 1 | 90  | N | Withdrawn   |
| 116174 | M | Sidamo Region A Level or I  | 0 | 90  | N | Withdrawn   |
| 116621 | M | North Region A Level or I   | 0 | 60  | N | Distinction |
| 117510 | M | Addis Ababa A Level or I    | 0 | 90  | N | Pass        |
| 117550 | M | Oromia Region Lower Than    | 0 | 60  | N | Fail        |
| 124018 | M | Oromia Region A Level or I  | 0 | 120 | N | Withdrawn   |
| 128132 | M | Sidamo Region A Level or I  | 0 | 60  | N | Pass        |
| 128968 | M | Sidamo Region A Level or I  | 0 | 60  | N | Pass        |
| 130992 | M | South Region A Level or I   | 0 | 60  | N | Pass        |
| 131538 | M | South Region A Level or I   | 0 | 60  | N | Pass        |
| 132157 | M | Sidamo Region A Level or I  | 0 | 60  | Y | Pass        |
| 132477 | M | Sidamo Region Lower Than    | 0 | 60  | Y | Pass        |
| 133104 | M | Sidamo Region Lower Than    | 0 | 120 | Y | Pass        |
| 133322 | M | Amhara Region HE Qualific   | 0 | 60  | N | Fail        |
| 134847 | M | Afar Region HE Qualific     | 1 | 120 | N | Pass        |
| 134851 | M | South Region Lower Than     | 1 | 120 | N | Pass        |
| 136054 | F | North Region HE Qualific    | 0 | 90  | N | Pass        |
| 136944 | M | Afar Region A Level or I    | 0 | 90  | N | Withdrawn   |
| 140108 | M | Sidamo Region No Formal     | 0 | 120 | N | Fail        |
| 141430 | M | Sidamo Region A Level or I  | 1 | 60  | N | Pass        |
| 150121 | M | Somalia Region Lower Than   | 4 | 210 | Y | Fail        |
| 152626 | M | Amhara Region Lower Than    | 0 | 60  | N | Pass        |
| 153611 | F | Addis Ababa Lower Than      | 0 | 60  | Y | Fail        |
| 155158 | M | Sidamo Region A Level or I  | 0 | 60  | N | Pass        |
| 156788 | M | Somalia Region Lower Than   | 0 | 180 | N | Withdrawn   |
| 160262 | M | Addis Ababa Lower Than      | 0 | 150 | N | Fail        |
| 160472 | M | Somalia Region Lower Than   | 0 | 60  | N | Fail        |
| 163332 | M | Sidamo Region HE Qualific   | 0 | 60  | N | Fail        |
| 163962 | M | Sidamo Region A Level or I  | 3 | 120 | N | Withdrawn   |
| 167106 | M | Addis Ababa Lower Than      | 2 | 60  | N | Pass        |
| 174155 | M | Somalia Region A Level or I | 0 | 60  | Y | Withdrawn   |
| 178179 | M | Sidamo Region Lower Than    | 0 | 150 | N | Pass        |
| 179081 | M | South Region HE Qualific    | 0 | 120 | N | Fail        |
| 181719 | M | Sidamo Region HE Qualific   | 0 | 60  | N | Withdrawn   |
| 183429 | F | Sidamo Region A Level or I  | 0 | 60  | N | Fail        |
| 190418 | M | Addis Ababa A Level or I    | 0 | 120 | N | Distinction |
| 190829 | M | Sidamo Region Lower Than    | 0 | 90  | N | Withdrawn   |
| 190930 | M | South West HE Qualific      | 0 | 90  | N | Pass        |

|        |   |                         |   |     |   |             |
|--------|---|-------------------------|---|-----|---|-------------|
| 191590 | M | Sidamo Re Lower Than    | 0 | 90  | N | Pass        |
| 193803 | M | South Regi Post Gradu   | 2 | 180 | N | Withdrawn   |
| 195515 | F | Sidamo Re A Level or I  | 0 | 120 | N | Pass        |
| 195552 | M | Sidamo Re A Level or I  | 0 | 120 | N | Withdrawn   |
| 197097 | F | South Wes A Level or I  | 0 | 90  | N | Withdrawn   |
| 197538 | M | Somalia Re A Level or I | 1 | 60  | N | Withdrawn   |
| 203568 | F | Addis Abak Lower Than   | 1 | 180 | N | Fail        |
| 227297 | M | Sidamo Re Lower Than    | 0 | 60  | N | Pass        |
| 228138 | M | South Regi Lower Than   | 0 | 60  | N | Pass        |
| 228258 | M | Oromia Re A Level or I  | 0 | 60  | N | Fail        |
| 228729 | M | Addis Abak Lower Than   | 0 | 60  | N | Pass        |
| 232286 | M | Sidamo Re Lower Than    | 0 | 150 | Y | Pass        |
| 234796 | M | Sidamo Re A Level or I  | 0 | 180 | N | Pass        |
| 237182 | M | Addis Abak Lower Than   | 1 | 90  | N | Fail        |
| 237370 | F | Somalia Re A Level or I | 0 | 90  | N | Withdrawn   |
| 239345 | M | South Regi HE Qualific  | 0 | 60  | N | Pass        |
| 242254 | F | Sidamo Re A Level or I  | 1 | 180 | N | Fail        |
| 242998 | M | Oromia Re A Level or I  | 0 | 60  | N | Pass        |
| 244961 | F | Somalia Re A Level or I | 0 | 60  | N | Pass        |
| 247714 | M | South Regi HE Qualific  | 0 | 90  | N | Withdrawn   |
| 247940 | M | Amhara Re Lower Than    | 5 | 180 | N | Fail        |
| 251375 | M | South Wes A Level or I  | 1 | 120 | N | Pass        |
| 255878 | M | South Regi Lower Than   | 0 | 90  | N | Pass        |
| 256740 | F | Tigrai Regi HE Qualific | 0 | 120 | N | Pass        |
| 257104 | F | South Regi Lower Than   | 0 | 60  | N | Withdrawn   |
| 258737 | M | Sidamo Re A Level or I  | 0 | 90  | N | Pass        |
| 260062 | M | Afar Regio HE Qualific  | 1 | 150 | N | Pass        |
| 261265 | M | Addis Abak Lower Than   | 0 | 120 | N | Pass        |
| 264298 | M | Afar Regio A Level or I | 0 | 60  | N | Withdrawn   |
| 266536 | M | Oromia Re A Level or I  | 0 | 60  | N | Pass        |
| 268649 | M | Sidamo Re Lower Than    | 0 | 90  | N | Withdrawn   |
| 268845 | M | South Regi HE Qualific  | 0 | 120 | N | Withdrawn   |
| 269730 | M | Afar Regio A Level or I | 0 | 60  | N | Pass        |
| 271702 | M | South Regi Lower Than   | 1 | 120 | N | Withdrawn   |
| 272701 | M | Addis Abak Lower Than   | 2 | 60  | N | Fail        |
| 276265 | M | Afar Regio A Level or I | 1 | 60  | Y | Withdrawn   |
| 277577 | F | Sidamo Re A Level or I  | 2 | 120 | N | Pass        |
| 278155 | F | South Regi Lower Than   | 0 | 90  | N | Distinction |
| 279755 | F | South Wes A Level or I  | 0 | 120 | N | Pass        |
| 282806 | M | North Regi Lower Than   | 2 | 60  | Y | Fail        |
| 286484 | M | Amhara Re A Level or I  | 0 | 90  | N | Withdrawn   |
| 289180 | M | Amhara Re A Level or I  | 0 | 120 | Y | Withdrawn   |
| 293454 | M | Addis Abak A Level or I | 0 | 60  | N | Fail        |
| 295741 | M | Oromia Re A Level or I  | 0 | 180 | N | Pass        |
| 296904 | M | Addis Abak Lower Than   | 0 | 60  | N | Pass        |
| 297014 | M | South Wes HE Qualific   | 0 | 60  | N | Pass        |
| 301128 | M | Somalia Re A Level or I | 1 | 180 | N | Withdrawn   |



|        |   |                          |   |     |   |             |
|--------|---|--------------------------|---|-----|---|-------------|
| 302363 | M | Sidamo Re, A Level or I  | 0 | 60  | N | Withdrawn   |
| 304500 | M | Tigrai Regi HE Qualific  | 0 | 60  | N | Fail        |
| 305876 | M | Afar Regio HE Qualific   | 0 | 120 | Y | Pass        |
| 305918 | M | South Regi A Level or I  | 0 | 60  | N | Fail        |
| 313243 | M | Tigrai Regi A Level or I | 0 | 75  | N | Pass        |
| 313756 | M | South Regi A Level or I  | 0 | 60  | N | Pass        |
| 315025 | M | Addis Abak HE Qualific   | 0 | 60  | N | Pass        |
| 315850 | M | Afar Regio A Level or I  | 0 | 60  | Y | Pass        |
| 316327 | F | Afar Regio Lower Than    | 1 | 90  | N | Fail        |
| 316772 | M | Somalia Re A Level or I  | 1 | 180 | N | Withdrawn   |
| 317394 | F | South Regi A Level or I  | 0 | 120 | N | Distinction |
| 318068 | M | South Wes A Level or I   | 4 | 120 | Y | Pass        |
| 319042 | M | Sidamo Re, A Level or I  | 3 | 180 | N | Pass        |
| 321096 | M | South Regi Lower Than    | 0 | 60  | N | Pass        |
| 323688 | M | Addis Abak Lower Than    | 0 | 60  | N | Withdrawn   |
| 324948 | M | Amhara Re A Level or I   | 0 | 60  | N | Pass        |
| 325089 | M | South Regi Lower Than    | 1 | 120 | N | Pass        |
| 326995 | M | Sidamo Re, A Level or I  | 0 | 90  | N | Withdrawn   |
| 327616 | M | North Regi A Level or I  | 0 | 90  | N | Pass        |
| 328797 | M | Afar Regio HE Qualific   | 0 | 60  | N | Withdrawn   |
| 329895 | M | Addis Abak A Level or I  | 2 | 60  | N | Withdrawn   |
| 330669 | F | Sidamo Re, Lower Than    | 1 | 180 | N | Withdrawn   |
| 331107 | M | Afar Regio Lower Than    | 0 | 60  | N | Fail        |
| 332237 | M | South Regi HE Qualific   | 0 | 60  | N | Withdrawn   |
| 334224 | M | Amhara Re Lower Than     | 1 | 150 | Y | Withdrawn   |
| 335996 | M | Addis Abak A Level or I  | 0 | 120 | N | Withdrawn   |
| 336163 | M | Sidamo Re, No Formal     | 1 | 120 | N | Fail        |
| 337615 | M | Tigrai Regi HE Qualific  | 3 | 150 | N | Fail        |
| 337940 | M | Afar Regio Lower Than    | 0 | 60  | N | Withdrawn   |
| 338958 | F | Somalia Re A Level or I  | 0 | 60  | N | Fail        |
| 339728 | M | Sidamo Re, A Level or I  | 0 | 60  | N | Pass        |
| 339824 | M | Addis Abak A Level or I  | 0 | 60  | Y | Distinction |
| 339855 | M | Amhara Re A Level or I   | 0 | 60  | N | Withdrawn   |
| 341044 | M | South Wes No Formal      | 1 | 90  | N | Fail        |
| 342089 | M | North Regi HE Qualific   | 0 | 90  | N | Fail        |
| 342125 | M | Sidamo Re, HE Qualific   | 1 | 60  | N | Pass        |
| 342234 | F | South Regi Post Gradu    | 0 | 120 | N | Pass        |
| 342303 | M | Tigrai Regi Lower Than   | 1 | 60  | N | Withdrawn   |
| 344409 | M | Addis Abak A Level or I  | 0 | 90  | N | Pass        |
| 344451 | M | Sidamo Re, A Level or I  | 1 | 60  | N | Pass        |
| 345442 | M | South Wes Lower Than     | 0 | 60  | N | Fail        |
| 345455 | M | North Regi Lower Than    | 0 | 60  | N | Fail        |
| 347257 | M | Amhara Re Lower Than     | 0 | 120 | N | Withdrawn   |
| 348378 | M | South Wes A Level or I   | 0 | 60  | N | Fail        |
| 348855 | M | Afar Regio Post Gradu    | 0 | 60  | N | Pass        |
| 351181 | F | Addis Abak HE Qualific   | 0 | 60  | N | Pass        |
| 353979 | M | Sidamo Re, Lower Than    | 0 | 90  | N | Fail        |

|        |   |                          |   |     |   |             |
|--------|---|--------------------------|---|-----|---|-------------|
| 354552 | M | South Regi A Level or l  | 1 | 60  | N | Withdrawn   |
| 354988 | M | Tigrai Regi Lower Tha    | 0 | 90  | N | Withdrawn   |
| 356371 | M | Amhara Re HE Qualific    | 0 | 60  | N | Pass        |
| 356535 | M | Amhara Re A Level or l   | 2 | 120 | N | Withdrawn   |
| 362661 | M | Amhara Re A Level or l   | 0 | 90  | N | Pass        |
| 365860 | M | Somalia Re A Level or l  | 2 | 120 | N | Pass        |
| 367510 | M | Sidamo Re A Level or l   | 2 | 120 | Y | Withdrawn   |
| 367898 | M | Oromia Re A Level or l   | 0 | 120 | N | Pass        |
| 368675 | M | South Regi Lower Tha     | 0 | 60  | N | Pass        |
| 371168 | M | Amhara Re A Level or l   | 0 | 60  | N | Distinction |
| 378809 | M | North Regi Lower Tha     | 0 | 60  | N | Pass        |
| 379042 | M | Tigrai Regi A Level or l | 2 | 60  | N | Distinction |
| 379107 | F | South Wes Lower Tha      | 0 | 60  | N | Fail        |
| 379769 | M | Tigrai Regi A Level or l | 1 | 120 | N | Fail        |
| 381365 | M | Amhara Re Lower Tha      | 3 | 120 | N | Fail        |
| 382857 | M | South Wes Lower Tha      | 2 | 180 | N | Fail        |
| 383778 | M | South Regi Lower Tha     | 0 | 60  | N | Fail        |
| 383921 | M | Amhara Re A Level or l   | 1 | 60  | N | Fail        |
| 385547 | M | Amhara Re Lower Tha      | 1 | 180 | N | Withdrawn   |
| 388697 | M | South Regi A Level or l  | 0 | 60  | N | Pass        |
| 389759 | M | South Wes HE Qualific    | 2 | 120 | N | Fail        |
| 389773 | F | Somalia Re A Level or l  | 2 | 120 | Y | Fail        |
| 391114 | M | Oromia Re A Level or l   | 0 | 60  | N | Pass        |
| 392207 | M | South Wes HE Qualific    | 0 | 60  | N | Fail        |
| 395188 | F | Sidamo Re Lower Tha      | 0 | 90  | N | Fail        |
| 395758 | M | North Regi HE Qualific   | 0 | 120 | N | Withdrawn   |
| 395814 | M | Amhara Re A Level or l   | 1 | 120 | N | Fail        |
| 398357 | M | Addis Abak Lower Tha     | 0 | 90  | N | Withdrawn   |
| 398439 | M | Amhara Re A Level or l   | 0 | 210 | N | Pass        |
| 399863 | M | South Regi A Level or l  | 1 | 270 | N | Fail        |
| 400252 | M | Amhara Re Lower Tha      | 1 | 210 | N | Pass        |
| 402200 | M | Sidamo Re A Level or l   | 0 | 60  | N | Withdrawn   |
| 402449 | M | Addis Abak A Level or l  | 0 | 120 | N | Fail        |
| 402502 | M | South Regi A Level or l  | 0 | 60  | N | Distinction |
| 402806 | F | Amhara Re A Level or l   | 0 | 270 | N | Pass        |
| 404170 | F | Sidamo Re A Level or l   | 1 | 60  | N | Pass        |
| 405192 | F | Somalia Re A Level or l  | 1 | 90  | N | Pass        |
| 405775 | M | Sidamo Re A Level or l   | 0 | 60  | Y | Pass        |
| 405963 | M | Sidamo Re A Level or l   | 1 | 60  | N | Withdrawn   |
| 406116 | F | Amhara Re Lower Tha      | 0 | 120 | N | Withdrawn   |
| 407500 | M | Addis Abak A Level or l  | 1 | 60  | N | Pass        |
| 408105 | M | South Regi A Level or l  | 1 | 60  | N | Fail        |
| 408353 | M | Oromia Re A Level or l   | 0 | 60  | N | Pass        |
| 409651 | M | South Wes A Level or l   | 0 | 120 | N | Pass        |
| 409949 | M | Somalia Re A Level or l  | 0 | 90  | N | Fail        |
| 410199 | M | South Wes A Level or l   | 0 | 120 | N | Pass        |
| 410666 | M | South Regi A Level or l  | 3 | 120 | N | Fail        |

|        |   |                          |   |     |   |             |
|--------|---|--------------------------|---|-----|---|-------------|
| 411939 | M | South Regi A Level or    | 2 | 150 | N | Fail        |
| 412387 | F | Oromia Re A Level or     | 0 | 60  | Y | Withdrawn   |
| 412695 | M | South Regi A Level or    | 0 | 60  | N | Pass        |
| 413200 | M | Oromia Re HE Qualific    | 0 | 60  | N | Pass        |
| 414258 | F | Afar Regioi A Level or   | 1 | 90  | N | Pass        |
| 416302 | M | Addis Abak A Level or    | 0 | 60  | Y | Pass        |
| 417184 | M | South Regi A Level or    | 0 | 60  | N | Pass        |
| 417805 | M | Tigrai Regio HE Qualific | 1 | 120 | N | Fail        |
| 418218 | M | Sidamo Re Lower Than     | 0 | 60  | N | Pass        |
| 419284 | M | South Wes HE Qualific    | 0 | 90  | N | Pass        |
| 420042 | F | Sidamo Re HE Qualific    | 0 | 150 | N | Pass        |
| 421179 | M | South Regi Lower Than    | 0 | 60  | Y | Fail        |
| 421989 | M | Somalia Re A Level or    | 1 | 90  | N | Withdrawn   |
| 422250 | M | Sidamo Re A Level or     | 3 | 180 | N | Fail        |
| 422530 | M | Afar Regioi A Level or   | 0 | 150 | N | Pass        |
| 422626 | F | South Wes A Level or     | 0 | 180 | N | Pass        |
| 422697 | M | Addis Abak A Level or    | 0 | 60  | N | Distinction |
| 423648 | M | South Wes Lower Than     | 1 | 90  | N | Fail        |
| 425332 | M | Oromia Re A Level or     | 1 | 60  | Y | Fail        |
| 426782 | F | Sidamo Re Lower Than     | 0 | 90  | N | Withdrawn   |
| 427276 | F | South Regi A Level or    | 0 | 120 | N | Withdrawn   |
| 427485 | M | South Wes Lower Than     | 1 | 120 | N | Withdrawn   |
| 428068 | M | Tigrai Regio Lower Than  | 1 | 90  | N | Fail        |
| 429015 | M | South Wes A Level or     | 0 | 60  | N | Pass        |
| 430516 | M | Somalia Re Lower Than    | 0 | 60  | N | Fail        |
| 430625 | M | Oromia Re Lower Than     | 2 | 180 | N | Withdrawn   |
| 431987 | M | Amhara Re A Level or     | 1 | 120 | N | Distinction |
| 435446 | M | Sidamo Re A Level or     | 0 | 90  | N | Pass        |
| 436481 | M | Oromia Re HE Qualific    | 0 | 60  | N | Pass        |
| 436590 | F | Afar Regioi A Level or   | 0 | 75  | N | Pass        |
| 437303 | M | Amhara Re A Level or     | 2 | 60  | N | Withdrawn   |
| 437529 | M | South Regi A Level or    | 0 | 60  | N | Withdrawn   |
| 438796 | M | South Regi Post Gradu    | 0 | 120 | N | Pass        |
| 439433 | M | Sidamo Re A Level or     | 0 | 120 | N | Pass        |
| 439633 | M | Somalia Re A Level or    | 1 | 60  | N | Pass        |
| 439896 | M | South Regi Lower Than    | 1 | 90  | N | Withdrawn   |
| 440559 | M | South Wes HE Qualific    | 0 | 120 | N | Pass        |
| 441073 | F | South Regi Lower Than    | 0 | 120 | N | Fail        |
| 442753 | M | Amhara Re A Level or     | 2 | 210 | N | Withdrawn   |
| 442819 | M | Amhara Re A Level or     | 0 | 60  | N | Withdrawn   |
| 443007 | M | Amhara Re A Level or     | 0 | 60  | N | Pass        |
| 444574 | M | Oromia Re A Level or     | 0 | 60  | N | Fail        |
| 444718 | M | South Wes A Level or     | 0 | 60  | N | Fail        |
| 445605 | M | Sidamo Re No Formal      | 0 | 60  | N | Withdrawn   |
| 445818 | F | Addis Abak Lower Than    | 0 | 60  | Y | Fail        |
| 445947 | M | Afar Regioi Lower Than   | 0 | 120 | N | Fail        |
| 447036 | M | Addis Abak Lower Than    | 3 | 150 | N | Withdrawn   |

|        |   |                             |   |     |   |             |
|--------|---|-----------------------------|---|-----|---|-------------|
| 465175 | M | Afar Region Lower Than      | 2 | 60  | N | Pass        |
| 465421 | M | South Region HE Qualific    | 0 | 60  | N | Pass        |
| 466347 | M | South West A Level or I     | 2 | 60  | N | Fail        |
| 466576 | M | Afar Region Post Gradu      | 0 | 75  | N | Fail        |
| 467582 | M | South Region A Level or I   | 1 | 210 | N | Pass        |
| 468730 | M | Somalia Region A Level or I | 1 | 60  | Y | Fail        |
| 469977 | M | Tigray Region Lower Than    | 0 | 60  | N | Pass        |
| 470619 | F | Afar Region A Level or I    | 0 | 120 | N | Pass        |
| 472120 | M | North Region A Level or I   | 2 | 60  | N | Pass        |
| 472341 | M | Afar Region A Level or I    | 0 | 60  | Y | Fail        |
| 472810 | M | Addis Ababa Lower Than      | 1 | 60  | N | Fail        |
| 474677 | M | Sidamo Region Lower Than    | 1 | 60  | N | Fail        |
| 475811 | M | Sidamo Region Lower Than    | 1 | 60  | N | Pass        |
| 476912 | M | South West A Level or I     | 1 | 60  | N | Fail        |
| 477069 | M | Somalia Region Lower Than   | 1 | 120 | Y | Fail        |
| 477588 | M | South Region A Level or I   | 0 | 90  | N | Pass        |
| 477812 | M | Afar Region Lower Than      | 2 | 120 | Y | Distinction |
| 477833 | M | Sidamo Region Lower Than    | 0 | 60  | Y | Withdrawn   |
| 478073 | F | South Region A Level or I   | 0 | 150 | Y | Pass        |
| 479061 | M | South Region A Level or I   | 0 | 60  | N | Distinction |
| 480531 | M | Somalia Region A Level or I | 0 | 60  | N | Withdrawn   |
| 481210 | F | South Region Lower Than     | 0 | 60  | N | Fail        |
| 482445 | M | Afar Region HE Qualific     | 1 | 120 | N | Fail        |
| 482843 | F | South West Lower Than       | 0 | 60  | N | Pass        |
| 483195 | M | North Region Lower Than     | 1 | 120 | N | Withdrawn   |
| 483389 | F | North Region Lower Than     | 0 | 60  | N | Pass        |
| 483975 | M | North Region Lower Than     | 1 | 120 | N | Pass        |
| 484075 | M | Tigray Region A Level or I  | 1 | 90  | N | Pass        |
| 484223 | F | South West Lower Than       | 0 | 60  | N | Pass        |
| 484292 | M | South Region Lower Than     | 2 | 120 | N | Withdrawn   |
| 484675 | M | Amhara Region Lower Than    | 2 | 120 | Y | Withdrawn   |
| 485312 | M | Afar Region HE Qualific     | 0 | 90  | N | Pass        |
| 485780 | F | North Region HE Qualific    | 0 | 90  | N | Pass        |
| 487168 | F | Somalia Region A Level or I | 1 | 150 | N | Fail        |
| 487314 | M | Tigray Region HE Qualific   | 0 | 60  | N | Distinction |
| 488386 | F | Sidamo Region HE Qualific   | 1 | 60  | Y | Fail        |
| 488524 | M | Somalia Region HE Qualific  | 0 | 60  | N | Pass        |
| 488758 | M | North Region A Level or I   | 1 | 60  | N | Fail        |
| 489137 | M | Somalia Region Post Gradu   | 0 | 60  | N | Pass        |
| 490154 | M | Amhara Region Lower Than    | 2 | 60  | N | Fail        |
| 491011 | M | Oromia Region A Level or I  | 2 | 120 | Y | Pass        |
| 491486 | M | South West Lower Than       | 0 | 60  | N | Withdrawn   |
| 491548 | M | Oromia Region A Level or I  | 1 | 60  | N | Fail        |
| 492088 | M | Amhara Region Lower Than    | 0 | 120 | N | Pass        |
| 493760 | F | South Region A Level or I   | 0 | 120 | N | Distinction |
| 494433 | M | South West A Level or I     | 0 | 60  | N | Pass        |
| 494495 | M | Somalia Region A Level or I | 1 | 180 | N | Withdrawn   |

|        |   |                          |   |     |   |             |
|--------|---|--------------------------|---|-----|---|-------------|
| 494818 | F | Sidamo Re A Level or I   | 0 | 120 | N | Pass        |
| 495580 | F | Tigrai Regi A Level or I | 0 | 90  | N | Fail        |
| 495618 | M | South Regi Lower Tha     | 0 | 90  | N | Withdrawn   |
| 496590 | M | South Wes Lower Tha      | 1 | 120 | N | Fail        |
| 498006 | M | South Regi A Level or I  | 0 | 60  | N | Pass        |
| 498266 | M | Amhara Re A Level or I   | 0 | 120 | N | Distinction |
| 498636 | M | South Regi Lower Tha     | 2 | 120 | Y | Fail        |
| 498828 | M | Addis Abak A Level or I  | 0 | 60  | N | Fail        |
| 499244 | M | South Regi Lower Tha     | 2 | 90  | N | Withdrawn   |
| 499404 | F | Amhara Re A Level or I   | 1 | 150 | N | Withdrawn   |
| 499813 | M | North Regi A Level or I  | 0 | 120 | N | Distinction |
| 501302 | F | Afar Regio HE Qualific   | 1 | 60  | N | Fail        |
| 501421 | M | South Regi Lower Tha     | 0 | 60  | N | Fail        |
| 502150 | M | Sidamo Re A Level or I   | 1 | 60  | N | Withdrawn   |
| 502501 | M | Amhara Re Lower Tha      | 0 | 90  | N | Fail        |
| 502993 | F | Sidamo Re A Level or I   | 0 | 60  | N | Pass        |
| 503024 | F | Sidamo Re Lower Tha      | 0 | 60  | N | Withdrawn   |
| 503154 | M | Tigrai Regi A Level or I | 2 | 120 | N | Pass        |
| 503183 | M | Addis Abak A Level or I  | 0 | 60  | N | Pass        |
| 504583 | M | South Regi Lower Tha     | 0 | 120 | N | Withdrawn   |
| 504700 | M | South Wes A Level or I   | 1 | 120 | N | Withdrawn   |
| 505017 | M | Amhara Re A Level or I   | 1 | 60  | N | Pass        |
| 505131 | M | Somalia Re Lower Tha     | 0 | 60  | N | Withdrawn   |
| 505826 | M | North Regi A Level or I  | 2 | 60  | N | Withdrawn   |
| 505900 | M | Sidamo Re HE Qualific    | 1 | 60  | N | Withdrawn   |
| 506038 | F | South Regi Lower Tha     | 0 | 60  | N | Distinction |
| 506674 | F | Tigrai Regi Lower Tha    | 0 | 300 | N | Fail        |
| 507577 | M | Amhara Re A Level or I   | 0 | 120 | N | Withdrawn   |
| 509292 | M | South Regi Lower Tha     | 0 | 90  | Y | Withdrawn   |
| 509407 | M | South Wes Lower Tha      | 2 | 180 | N | Fail        |
| 509866 | M | South Regi A Level or I  | 0 | 60  | N | Fail        |
| 510142 | F | North Regi Lower Tha     | 1 | 150 | Y | Fail        |
| 510420 | M | Amhara Re Lower Tha      | 0 | 60  | N | Pass        |
| 510693 | M | Sidamo Re A Level or I   | 1 | 60  | N | Fail        |
| 511350 | M | Sidamo Re Lower Tha      | 0 | 60  | Y | Withdrawn   |
| 511912 | M | Oromia Re A Level or I   | 0 | 90  | N | Distinction |
| 512236 | M | North Regi HE Qualific   | 0 | 120 | N | Fail        |
| 513701 | M | Amhara Re A Level or I   | 1 | 90  | N | Pass        |
| 513796 | M | Addis Abak Lower Tha     | 1 | 120 | N | Withdrawn   |
| 515965 | M | Sidamo Re HE Qualific    | 1 | 120 | N | Fail        |
| 516634 | F | Afar Regio HE Qualific   | 0 | 60  | N | Pass        |
| 516770 | M | South Regi Lower Tha     | 2 | 120 | N | Pass        |
| 516894 | M | Amhara Re A Level or I   | 1 | 90  | N | Fail        |
| 517274 | M | Amhara Re Lower Tha      | 0 | 90  | N | Pass        |
| 517277 | F | Tigrai Regi A Level or I | 0 | 60  | Y | Pass        |
| 518210 | M | South Wes A Level or I   | 0 | 60  | Y | Pass        |
| 518359 | M | South Wes Post Gradu     | 0 | 60  | N | Distinction |

|        |   |                          |   |     |   |             |
|--------|---|--------------------------|---|-----|---|-------------|
| 521032 | M | Addis Abat Lower Tha     | 0 | 90  | N | Withdrawn   |
| 521073 | F | Amhara Re Lower Tha      | 2 | 120 | N | Withdrawn   |
| 521377 | M | South Wes A Level or I   | 1 | 60  | N | Fail        |
| 524296 | M | Somalia Re Lower Tha     | 0 | 60  | N | Fail        |
| 524379 | F | Sidamo Re Lower Tha      | 1 | 210 | N | Withdrawn   |
| 525874 | M | Amhara Re Lower Tha      | 1 | 180 | N | Fail        |
| 526303 | M | South Wes HE Qualific    | 3 | 120 | N | Pass        |
| 526821 | M | Amhara Re A Level or I   | 0 | 120 | N | Pass        |
| 527744 | F | Tigrai Regi A Level or I | 2 | 120 | N | Withdrawn   |
| 528538 | F | Oromia Re Lower Tha      | 0 | 120 | N | Withdrawn   |
| 528713 | M | Sidamo Re Lower Tha      | 1 | 60  | N | Fail        |
| 529390 | M | South Wes Lower Tha      | 1 | 60  | N | Withdrawn   |
| 529458 | M | South Wes Lower Tha      | 1 | 60  | N | Withdrawn   |
| 530196 | F | Somalia Re Lower Tha     | 0 | 60  | N | Withdrawn   |
| 532062 | M | Addis Abat Lower Tha     | 3 | 120 | N | Withdrawn   |
| 532413 | M | Oromia Re Lower Tha      | 0 | 60  | N | Pass        |
| 532575 | M | South Regi Lower Tha     | 1 | 120 | N | Fail        |
| 533140 | M | Addis Abat Lower Tha     | 0 | 60  | N | Withdrawn   |
| 533141 | M | Tigrai Regi A Level or I | 0 | 60  | N | Fail        |
| 533198 | F | Addis Abat Lower Tha     | 2 | 120 | Y | Withdrawn   |
| 533217 | M | South Regi A Level or I  | 1 | 120 | N | Pass        |
| 534318 | F | Sidamo Re Lower Tha      | 0 | 60  | N | Withdrawn   |
| 535460 | M | Sidamo Re A Level or I   | 1 | 90  | N | Withdrawn   |
| 536636 | M | Somalia Re A Level or I  | 0 | 120 | N | Fail        |
| 536711 | M | Amhara Re Lower Tha      | 1 | 120 | Y | Withdrawn   |
| 537322 | M | Afar Regioi A Level or I | 0 | 90  | N | Withdrawn   |
| 537703 | M | Amhara Re A Level or I   | 0 | 60  | N | Distinction |
| 537938 | M | South Wes A Level or I   | 0 | 120 | N | Pass        |
| 539401 | M | Sidamo Re A Level or I   | 2 | 120 | N | Withdrawn   |
| 539444 | M | South Regi A Level or I  | 0 | 60  | N | Pass        |
| 539922 | F | Afar Regioi HE Qualific  | 2 | 120 | N | Pass        |
| 540909 | M | South Regi A Level or I  | 1 | 120 | N | Withdrawn   |
| 541281 | F | Sidamo Re Lower Tha      | 0 | 60  | N | Withdrawn   |
| 541327 | F | Afar Regioi Lower Tha    | 1 | 60  | N | Fail        |
| 541478 | M | Sidamo Re Lower Tha      | 0 | 60  | N | Withdrawn   |
| 542287 | F | Amhara Re A Level or I   | 0 | 60  | N | Pass        |
| 542557 | M | Afar Regioi HE Qualific  | 0 | 60  | N | Distinction |
| 543686 | M | Somalia Re A Level or I  | 0 | 60  | Y | Pass        |
| 543785 | M | North Regi Lower Tha     | 2 | 270 | N | Withdrawn   |
| 544108 | M | North Regi A Level or I  | 0 | 60  | N | Pass        |
| 544140 | M | Tigrai Regi Lower Tha    | 0 | 60  | N | Fail        |
| 544271 | M | South Regi A Level or I  | 0 | 60  | N | Distinction |
| 544276 | M | Sidamo Re Lower Tha      | 0 | 60  | N | Withdrawn   |
| 544593 | M | South Wes A Level or I   | 0 | 120 | N | Fail        |
| 545119 | M | South Regi Lower Tha     | 2 | 150 | Y | Pass        |
| 545637 | M | South Regi Lower Tha     | 0 | 60  | N | Pass        |
| 545741 | M | South Regi Lower Tha     | 0 | 60  | N | Pass        |

|        |   |                |             |   |     |   |             |
|--------|---|----------------|-------------|---|-----|---|-------------|
| 546071 | M | Afar Region    | A Level or  | 0 | 90  | N | Pass        |
| 546394 | M | Tigray Region  | HE Qualific | 1 | 120 | N | Withdrawn   |
| 546627 | M | Somalia Region | Lower Than  | 0 | 60  | N | Pass        |
| 546961 | M | Addis Ababa    | A Level or  | 0 | 60  | N | Pass        |
| 547128 | M | Tigray Region  | A Level or  | 1 | 190 | Y | Pass        |
| 547413 | F | Amhara Region  | No Formal   | 0 | 90  | N | Fail        |
| 547506 | M | Oromia Region  | A Level or  | 0 | 60  | N | Pass        |
| 547569 | M | North Region   | A Level or  | 0 | 60  | N | Fail        |
| 547680 | M | Oromia Region  | A Level or  | 1 | 120 | N | Distinction |
| 547884 | M | Oromia Region  | Lower Than  | 1 | 60  | N | Fail        |
| 548332 | M | North Region   | A Level or  | 1 | 120 | Y | Withdrawn   |
| 548424 | M | Sidamo Region  | Lower Than  | 1 | 60  | N | Pass        |
| 548573 | M | Amhara Region  | Lower Than  | 1 | 120 | N | Withdrawn   |
| 548926 | F | Addis Ababa    | A Level or  | 1 | 120 | N | Fail        |
| 549792 | M | Addis Ababa    | HE Qualific | 1 | 90  | N | Fail        |
| 550003 | M | Afar Region    | A Level or  | 0 | 60  | N | Fail        |
| 550038 | M | Sidamo Region  | Lower Than  | 0 | 60  | N | Pass        |
| 550097 | F | South Region   | A Level or  | 0 | 60  | N | Pass        |
| 550246 | M | Oromia Region  | Lower Than  | 2 | 120 | N | Fail        |
| 550498 | M | Sidamo Region  | Lower Than  | 0 | 60  | N | Fail        |
| 550903 | M | Afar Region    | HE Qualific | 0 | 60  | Y | Distinction |
| 550925 | M | Tigray Region  | Lower Than  | 0 | 90  | N | Pass        |
| 551636 | M | Amhara Region  | A Level or  | 2 | 120 | N | Withdrawn   |
| 552284 | M | Addis Ababa    | A Level or  | 2 | 120 | N | Pass        |
| 552395 | M | Sidamo Region  | A Level or  | 1 | 60  | Y | Fail        |
| 552648 | M | Amhara Region  | Lower Than  | 1 | 90  | N | Pass        |
| 553032 | M | Sidamo Region  | A Level or  | 0 | 120 | N | Withdrawn   |
| 553160 | M | Amhara Region  | A Level or  | 0 | 60  | N | Fail        |
| 554597 | M | Amhara Region  | Lower Than  | 0 | 60  | N | Withdrawn   |
| 554881 | M | South Region   | Lower Than  | 0 | 150 | N | Pass        |
| 555691 | M | Afar Region    | Lower Than  | 1 | 210 | N | Withdrawn   |
| 555929 | F | Oromia Region  | Lower Than  | 2 | 120 | N | Pass        |
| 556052 | M | Sidamo Region  | Lower Than  | 0 | 120 | N | Withdrawn   |
| 556126 | M | Sidamo Region  | A Level or  | 1 | 60  | Y | Withdrawn   |
| 556140 | M | South Region   | Lower Than  | 1 | 240 | N | Pass        |
| 556492 | M | South Region   | A Level or  | 2 | 240 | N | Fail        |
| 557141 | M | South Region   | Lower Than  | 0 | 60  | N | Withdrawn   |
| 557469 | M | South West     | A Level or  | 1 | 60  | N | Pass        |
| 557650 | M | Sidamo Region  | Lower Than  | 0 | 60  | N | Pass        |
| 557708 | M | Sidamo Region  | A Level or  | 0 | 60  | Y | Fail        |
| 557894 | M | Amhara Region  | Lower Than  | 1 | 120 | N | Withdrawn   |
| 558105 | M | Somalia Region | Lower Than  | 0 | 60  | N | Pass        |
| 558121 | M | South Region   | A Level or  | 1 | 60  | N | Pass        |
| 558244 | M | Tigray Region  | HE Qualific | 2 | 120 | N | Fail        |
| 558284 | M | South West     | Lower Than  | 1 | 150 | Y | Withdrawn   |
| 558404 | M | Sidamo Region  | Lower Than  | 1 | 120 | N | Withdrawn   |
| 559449 | M | North Region   | Post Gradu  | 1 | 60  | N | Fail        |

|        |   |                          |   |     |   |             |
|--------|---|--------------------------|---|-----|---|-------------|
| 559876 | M | South Regi Lower Tha     | 1 | 120 | N | Distinction |
| 560168 | F | Sidamo Re Lower Tha      | 1 | 150 | Y | Fail        |
| 560399 | M | South Regi HE Qualific   | 0 | 60  | N | Pass        |
| 560496 | F | Oromia Re A Level or I   | 2 | 120 | N | Pass        |
| 560595 | M | Addis Abat HE Qualific   | 1 | 120 | N | Withdrawn   |
| 560685 | M | South Regi Lower Tha     | 1 | 120 | N | Fail        |
| 561009 | F | Afar Regioi A Level or I | 1 | 120 | Y | Pass        |
| 561215 | M | Addis Abat Lower Tha     | 0 | 60  | N | Withdrawn   |
| 561796 | M | Amhara Re Lower Tha      | 1 | 120 | N | Withdrawn   |
| 561799 | F | Addis Abat HE Qualific   | 0 | 60  | N | Fail        |
| 562064 | F | Amhara Re A Level or I   | 0 | 180 | N | Withdrawn   |
| 562917 | M | Addis Abat A Level or I  | 0 | 150 | N | Withdrawn   |
| 563813 | M | Sidamo Re Lower Tha      | 0 | 60  | N | Withdrawn   |
| 563823 | M | Amhara Re A Level or I   | 0 | 60  | N | Pass        |
| 564632 | F | Sidamo Re Lower Tha      | 0 | 60  | N | Fail        |
| 565109 | M | South Regi Lower Tha     | 0 | 120 | N | Distinction |
| 565257 | M | North Regi A Level or I  | 1 | 120 | N | Withdrawn   |
| 565348 | M | Oromia Re A Level or I   | 0 | 60  | N | Withdrawn   |
| 565373 | M | South Regi A Level or I  | 1 | 120 | N | Pass        |
| 565469 | M | Somalia Re Lower Tha     | 1 | 120 | N | Withdrawn   |
| 565526 | M | North Regi HE Qualific   | 0 | 120 | N | Withdrawn   |
| 566460 | M | South Regi A Level or I  | 0 | 60  | Y | Fail        |
| 567168 | M | Amhara Re A Level or I   | 0 | 90  | N | Withdrawn   |
| 567629 | F | South Wes Lower Tha      | 0 | 60  | Y | Pass        |
| 567681 | M | Tigrai Regi Lower Tha    | 0 | 120 | N | Withdrawn   |
| 567859 | M | Afar Regioi A Level or I | 1 | 150 | N | Fail        |
| 567873 | M | Addis Abat A Level or I  | 0 | 90  | N | Distinction |
| 568954 | M | South Wes Lower Tha      | 0 | 120 | N | Pass        |
| 569065 | M | Amhara Re No Formal      | 0 | 60  | N | Pass        |
| 569556 | F | North Regi A Level or I  | 1 | 240 | N | Withdrawn   |
| 569729 | M | South Wes A Level or I   | 0 | 60  | N | Fail        |
| 569783 | M | Oromia Re Lower Tha      | 0 | 60  | N | Withdrawn   |
| 570264 | M | Somalia Re Lower Tha     | 0 | 60  | N | Fail        |
| 571050 | M | Sidamo Re A Level or I   | 0 | 60  | N | Pass        |
| 571190 | F | South Regi Lower Tha     | 0 | 60  | N | Pass        |
| 571316 | F | South Regi A Level or I  | 0 | 60  | Y | Distinction |
| 571612 | M | Tigrai Regi Lower Tha    | 1 | 120 | Y | Withdrawn   |
| 571815 | M | Sidamo Re Lower Tha      | 0 | 120 | N | Fail        |
| 571844 | M | Sidamo Re Lower Tha      | 1 | 210 | N | Pass        |
| 571962 | M | South Wes Lower Tha      | 1 | 120 | N | Pass        |
| 572154 | M | Afar Regioi HE Qualific  | 0 | 150 | N | Pass        |
| 572367 | M | Oromia Re A Level or I   | 1 | 120 | N | Fail        |
| 572395 | F | Amhara Re A Level or I   | 0 | 150 | N | Withdrawn   |
| 572716 | M | Sidamo Re A Level or I   | 0 | 120 | N | Pass        |
| 572804 | M | Tigrai Regi A Level or I | 0 | 90  | N | Withdrawn   |
| 572832 | M | South Regi Lower Tha     | 0 | 90  | Y | Pass        |
| 572870 | M | Somalia Re A Level or I  | 0 | 120 | N | Distinction |



|        |   |                          |   |     |   |             |
|--------|---|--------------------------|---|-----|---|-------------|
| 572952 | F | Sidamo Re HE Qualific    | 1 | 120 | N | Withdrawn   |
| 573549 | M | Sidamo Re Lower Thar     | 0 | 120 | N | Pass        |
| 574028 | M | Tigrai Regi A Level or I | 0 | 180 | Y | Pass        |
| 574605 | M | South Regi A Level or I  | 0 | 60  | N | Fail        |
| 574663 | M | Sidamo Re Lower Thar     | 0 | 240 | N | Withdrawn   |
| 574671 | F | Addis Abak HE Qualific   | 0 | 120 | N | Pass        |
| 574815 | M | South Regi Lower Thar    | 1 | 180 | N | Withdrawn   |
| 575855 | M | Sidamo Re HE Qualific    | 0 | 180 | N | Withdrawn   |
| 576159 | M | Afar Regi A Level or I   | 0 | 60  | N | Distinction |
| 576557 | M | South Regi A Level or I  | 0 | 120 | N | Withdrawn   |
| 577142 | F | Somalia Re A Level or I  | 0 | 60  | N | Withdrawn   |
| 577600 | M | Amhara Re Lower Thar     | 0 | 90  | N | Fail        |
| 577679 | F | South Regi A Level or I  | 0 | 120 | Y | Withdrawn   |
| 577795 | F | South Regi Lower Thar    | 0 | 120 | Y | Withdrawn   |
| 578022 | M | Somalia Re A Level or I  | 0 | 120 | N | Fail        |
| 578258 | M | South Wes Lower Thar     | 1 | 180 | N | Fail        |
| 578754 | M | South Regi Lower Thar    | 0 | 60  | N | Pass        |
| 578764 | M | Addis Abak A Level or I  | 0 | 90  | N | Pass        |
| 579081 | M | South Regi A Level or I  | 1 | 150 | N | Distinction |
| 579376 | M | Addis Abak A Level or I  | 0 | 90  | N | Pass        |
| 580425 | M | South Regi A Level or I  | 1 | 120 | N | Withdrawn   |
| 581065 | M | Tigrai Regi Lower Thar   | 0 | 120 | N | Withdrawn   |
| 581520 | M | Addis Abak Lower Thar    | 0 | 60  | N | Fail        |
| 581598 | M | South Wes A Level or I   | 0 | 60  | N | Pass        |
| 581772 | M | Sidamo Re Lower Thar     | 1 | 120 | N | Withdrawn   |
| 582553 | M | Tigrai Regi Lower Thar   | 0 | 300 | N | Fail        |
| 582629 | M | Tigrai Regi HE Qualific  | 1 | 180 | N | Fail        |
| 583056 | M | South Wes A Level or I   | 0 | 90  | N | Withdrawn   |
| 583138 | M | Amhara Re A Level or I   | 0 | 60  | N | Withdrawn   |
| 584184 | F | Sidamo Re A Level or I   | 0 | 90  | N | Pass        |
| 584571 | F | Sidamo Re A Level or I   | 0 | 90  | N | Fail        |
| 584842 | M | Somalia Re HE Qualific   | 0 | 90  | N | Pass        |
| 584843 | F | Addis Abak Lower Thar    | 1 | 180 | N | Withdrawn   |
| 584884 | M | Sidamo Re Lower Thar     | 0 | 60  | N | Withdrawn   |
| 584990 | M | Addis Abak A Level or I  | 1 | 120 | N | Fail        |
| 585454 | M | South Regi Lower Thar    | 1 | 240 | N | Distinction |
| 585921 | M | Afar Regi Lower Thar     | 1 | 120 | N | Distinction |
| 586351 | M | South Regi Lower Thar    | 0 | 180 | N | Withdrawn   |
| 586506 | F | Sidamo Re No Formal      | 0 | 60  | N | Fail        |
| 586543 | M | North Regi HE Qualific   | 1 | 180 | N | Fail        |
| 586592 | F | Addis Abak Lower Thar    | 0 | 60  | N | Pass        |
| 586917 | F | Amhara Re Lower Thar     | 0 | 60  | N | Pass        |
| 587195 | M | South Wes Lower Thar     | 1 | 240 | Y | Withdrawn   |
| 587248 | M | South Wes HE Qualific    | 1 | 150 | N | Withdrawn   |
| 587600 | M | Somalia Re A Level or I  | 0 | 120 | N | Pass        |
| 587696 | M | Tigrai Regi Lower Thar   | 1 | 120 | N | Fail        |
| 588107 | M | South Wes Lower Thar     | 1 | 210 | N | Withdrawn   |

|        |   |                          |   |     |   |             |
|--------|---|--------------------------|---|-----|---|-------------|
| 588145 | M | Oromia Re Lower Tha      | 0 | 60  | N | Pass        |
| 588436 | M | Sidamo Re, A Level or l  | 1 | 180 | N | Fail        |
| 588913 | M | Amhara Re HE Qualific    | 0 | 60  | N | Withdrawn   |
| 589016 | M | Sidamo Re, A Level or l  | 1 | 210 | N | Pass        |
| 589029 | M | South Regi Lower Tha     | 0 | 90  | N | Pass        |
| 589449 | M | Amhara Re A Level or l   | 0 | 60  | N | Distinction |
| 589454 | M | Amhara Re A Level or l   | 0 | 60  | N | Pass        |
| 589469 | M | South Regi A Level or l  | 1 | 120 | N | Withdrawn   |
| 589548 | M | Afar Regio Lower Tha     | 0 | 90  | N | Pass        |
| 589565 | F | South Regi Lower Tha     | 0 | 60  | N | Distinction |
| 589798 | M | Addis Abak Lower Tha     | 0 | 180 | N | Withdrawn   |
| 590018 | F | Amhara Re Lower Tha      | 0 | 180 | N | Pass        |
| 590508 | F | South Wes A Level or l   | 0 | 60  | N | Pass        |
| 590543 | M | South Regi Lower Tha     | 0 | 60  | N | Withdrawn   |
| 590548 | M | South Wes Lower Tha      | 1 | 120 | Y | Withdrawn   |
| 590604 | M | Afar Regio HE Qualific   | 1 | 180 | N | Fail        |
| 590970 | M | Oromia Re Lower Tha      | 1 | 210 | N | Pass        |
| 591111 | M | Oromia Re Lower Tha      | 0 | 120 | N | Fail        |
| 591132 | F | South Regi Lower Tha     | 0 | 90  | N | Fail        |
| 591318 | M | South Regi Lower Tha     | 0 | 60  | Y | Withdrawn   |
| 591550 | M | Amhara Re Lower Tha      | 0 | 60  | N | Fail        |
| 591946 | M | Tigrai Regi A Level or l | 0 | 120 | N | Withdrawn   |
| 592422 | F | Somalia Re A Level or l  | 0 | 60  | N | Fail        |
| 592632 | M | Amhara Re A Level or l   | 0 | 60  | N | Fail        |
| 592766 | M | Somalia Re A Level or l  | 0 | 90  | N | Pass        |
| 592939 | M | Afar Regio HE Qualific   | 1 | 240 | N | Withdrawn   |
| 593004 | M | Sidamo Re, A Level or l  | 1 | 180 | N | Withdrawn   |
| 593206 | M | Addis Abak Lower Tha     | 1 | 180 | N | Withdrawn   |
| 593220 | M | Oromia Re Lower Tha      | 0 | 120 | N | Withdrawn   |
| 593563 | M | South Regi Lower Tha     | 0 | 90  | N | Withdrawn   |
| 593617 | M | Afar Regio A Level or l  | 1 | 120 | N | Withdrawn   |
| 594122 | M | North Regi A Level or l  | 0 | 90  | N | Withdrawn   |
| 594136 | M | Somalia Re Lower Tha     | 1 | 120 | N | Distinction |
| 594258 | M | Amhara Re Lower Tha      | 0 | 90  | Y | Withdrawn   |
| 594374 | M | Sidamo Re, Lower Tha     | 0 | 120 | N | Fail        |
| 594636 | M | South Regi Lower Tha     | 0 | 90  | Y | Withdrawn   |
| 594909 | M | Amhara Re A Level or l   | 0 | 60  | N | Pass        |
| 595186 | M | South Regi Lower Tha     | 0 | 60  | N | Fail        |
| 595428 | M | Amhara Re HE Qualific    | 1 | 150 | N | Fail        |
| 595481 | M | South Regi HE Qualific   | 0 | 60  | N | Withdrawn   |
| 595895 | M | South Wes Lower Tha      | 1 | 120 | N | Fail        |
| 595935 | M | South Regi A Level or l  | 1 | 120 | N | Pass        |
| 595978 | M | Addis Abak Lower Tha     | 1 | 180 | Y | Fail        |
| 596243 | M | Addis Abak Lower Tha     | 0 | 60  | Y | Withdrawn   |
| 596482 | F | South Regi A Level or l  | 0 | 60  | N | Pass        |
| 596601 | F | Oromia Re A Level or l   | 1 | 180 | N | Pass        |
| 596637 | M | Sidamo Re, A Level or l  | 0 | 60  | Y | Withdrawn   |

|        |   |                          |   |     |   |             |
|--------|---|--------------------------|---|-----|---|-------------|
| 596663 | M | Addis Abat Lower Tha     | 0 | 90  | N | Withdrawn   |
| 596699 | M | Addis Abat HE Qualific   | 1 | 240 | N | Fail        |
| 596953 | M | Addis Abat Lower Tha     | 1 | 150 | N | Withdrawn   |
| 597234 | M | Sidamo Re Lower Tha      | 0 | 60  | N | Pass        |
| 597359 | F | South Regi HE Qualific   | 0 | 60  | N | Withdrawn   |
| 597378 | M | Sidamo Re Lower Tha      | 0 | 60  | N | Withdrawn   |
| 597386 | M | Afar Regio Lower Tha     | 1 | 120 | N | Withdrawn   |
| 597426 | M | Tigrai Regi A Level or I | 1 | 120 | N | Fail        |
| 597495 | F | Somalia Re A Level or I  | 0 | 60  | N | Fail        |
| 597662 | F | Addis Abat A Level or I  | 0 | 90  | N | Pass        |
| 597761 | F | South Regi Lower Tha     | 1 | 120 | N | Withdrawn   |
| 598113 | M | South Wes HE Qualific    | 0 | 120 | N | Pass        |
| 598300 | M | Amhara Re Lower Tha      | 1 | 210 | N | Fail        |
| 598353 | M | South Regi HE Qualific   | 1 | 150 | N | Fail        |
| 598362 | M | Addis Abat Lower Tha     | 0 | 60  | N | Withdrawn   |
| 598571 | M | South Wes A Level or I   | 0 | 60  | N | Distinction |
| 598642 | M | Tigrai Regi A Level or I | 1 | 180 | N | Pass        |
| 598713 | F | Addis Abat A Level or I  | 0 | 60  | N | Pass        |
| 599048 | F | Amhara Re Lower Tha      | 0 | 90  | N | Pass        |
| 599105 | F | Oromia Re Lower Tha      | 0 | 90  | N | Withdrawn   |
| 599117 | M | South Regi HE Qualific   | 1 | 120 | N | Fail        |
| 599398 | M | South Regi Lower Tha     | 0 | 120 | N | Pass        |
| 599740 | M | Sidamo Re A Level or I   | 0 | 60  | N | Pass        |
| 599812 | M | Addis Abat A Level or I  | 0 | 60  | N | Fail        |
| 600292 | M | Oromia Re Lower Tha      | 0 | 60  | N | Pass        |
| 600388 | M | Addis Abat Lower Tha     | 0 | 60  | N | Distinction |
| 600397 | F | Afar Regio Lower Tha     | 0 | 120 | N | Fail        |
| 600702 | M | Sidamo Re A Level or I   | 0 | 60  | Y | Pass        |
| 600893 | F | Sidamo Re Lower Tha      | 0 | 90  | N | Withdrawn   |
| 601155 | M | Tigrai Regi A Level or I | 0 | 60  | N | Withdrawn   |
| 601266 | M | Somalia Re A Level or I  | 0 | 90  | N | Withdrawn   |
| 601345 | M | Sidamo Re A Level or I   | 0 | 60  | N | Fail        |
| 601375 | M | Sidamo Re Lower Tha      | 0 | 120 | N | Pass        |
| 601435 | M | Sidamo Re Lower Tha      | 1 | 180 | N | Withdrawn   |
| 601560 | M | Addis Abat Lower Tha     | 0 | 60  | N | Fail        |
| 601649 | M | Somalia Re Lower Tha     | 1 | 120 | N | Withdrawn   |
| 601678 | M | Somalia Re Lower Tha     | 1 | 120 | N | Withdrawn   |
| 601735 | M | North Regi Lower Tha     | 0 | 120 | N | Pass        |
| 602571 | M | Sidamo Re Lower Tha      | 0 | 60  | N | Withdrawn   |
| 602672 | M | Somalia Re Lower Tha     | 1 | 180 | N | Fail        |
| 602681 | M | Tigrai Regi HE Qualific  | 0 | 60  | N | Pass        |
| 602818 | M | South Regi Lower Tha     | 0 | 120 | N | Fail        |
| 602854 | M | South Regi Lower Tha     | 0 | 90  | N | Pass        |
| 602862 | F | Afar Regio HE Qualific   | 0 | 60  | N | Pass        |
| 603111 | F | South Regi A Level or I  | 1 | 120 | N | Pass        |
| 603163 | M | South Wes Lower Tha      | 0 | 60  | N | Pass        |
| 603319 | M | North Regi HE Qualific   | 0 | 60  | N | Withdrawn   |

|        |   |                          |   |     |   |             |
|--------|---|--------------------------|---|-----|---|-------------|
| 603483 | F | South Regi Lower Tha     | 0 | 90  | N | Withdrawn   |
| 603539 | M | Somalia Re A Level or I  | 0 | 60  | N | Pass        |
| 603694 | M | Amhara Re A Level or I   | 0 | 60  | N | Fail        |
| 603848 | M | Sidamo Re Lower Tha      | 1 | 120 | Y | Fail        |
| 603972 | F | South Wes A Level or I   | 0 | 60  | N | Withdrawn   |
| 604174 | M | North Regi A Level or I  | 0 | 60  | N | Pass        |
| 604234 | M | Amhara Re A Level or I   | 0 | 90  | N | Fail        |
| 604293 | M | Amhara Re A Level or I   | 0 | 60  | N | Fail        |
| 604326 | F | Tigrai Regi No Formal    | 0 | 90  | N | Fail        |
| 604338 | M | Addis Abak A Level or I  | 0 | 60  | N | Pass        |
| 604614 | M | Sidamo Re A Level or I   | 0 | 90  | N | Withdrawn   |
| 604678 | M | Amhara Re A Level or I   | 0 | 120 | Y | Withdrawn   |
| 604698 | M | Sidamo Re No Formal      | 0 | 90  | N | Pass        |
| 604946 | M | Sidamo Re HE Qualific    | 1 | 120 | N | Withdrawn   |
| 604969 | M | Afar Regio Lower Tha     | 0 | 60  | N | Withdrawn   |
| 605228 | F | Sidamo Re Lower Tha      | 1 | 240 | N | Withdrawn   |
| 605312 | M | Somalia Re A Level or I  | 0 | 60  | N | Pass        |
| 605370 | M | Tigrai Regi A Level or I | 0 | 120 | N | Fail        |
| 605475 | M | Afar Regio A Level or I  | 0 | 180 | N | Pass        |
| 605493 | M | Somalia Re A Level or I  | 0 | 60  | N | Pass        |
| 605522 | M | Sidamo Re Lower Tha      | 0 | 60  | N | Fail        |
| 606300 | F | Somalia Re A Level or I  | 0 | 90  | N | Withdrawn   |
| 606407 | M | Sidamo Re A Level or I   | 1 | 120 | N | Fail        |
| 606713 | M | South Wes HE Qualific    | 0 | 60  | N | Pass        |
| 606870 | M | South Regi Lower Tha     | 0 | 90  | N | Pass        |
| 606911 | M | South Wes Lower Tha      | 1 | 150 | N | Withdrawn   |
| 606935 | M | Afar Regio HE Qualific   | 1 | 120 | N | Fail        |
| 606967 | M | Afar Regio A Level or I  | 1 | 150 | N | Fail        |
| 606976 | M | South Wes Lower Tha      | 0 | 60  | N | Pass        |
| 606977 | M | Amhara Re Lower Tha      | 0 | 60  | N | Pass        |
| 607453 | M | Oromia Re HE Qualific    | 1 | 240 | N | Pass        |
| 607702 | M | Amhara Re Lower Tha      | 1 | 120 | N | Fail        |
| 607896 | M | Sidamo Re A Level or I   | 1 | 150 | Y | Pass        |
| 607899 | M | South Wes Lower Tha      | 0 | 60  | N | Fail        |
| 608111 | M | Sidamo Re HE Qualific    | 1 | 180 | N | Fail        |
| 608173 | M | Tigrai Regi Lower Tha    | 0 | 75  | N | Withdrawn   |
| 608618 | M | Amhara Re A Level or I   | 1 | 120 | N | Withdrawn   |
| 608727 | M | North Regi A Level or I  | 1 | 120 | N | Withdrawn   |
| 608864 | F | Afar Regio Post Gradu    | 1 | 120 | N | Fail        |
| 608891 | M | Sidamo Re Lower Tha      | 0 | 60  | N | Distinction |
| 609171 | M | Somalia Re Lower Tha     | 0 | 120 | N | Fail        |
| 609347 | M | Somalia Re Lower Tha     | 0 | 60  | N | Withdrawn   |
| 609868 | F | Tigrai Regi Lower Tha    | 0 | 90  | N | Fail        |
| 609891 | M | South Regi A Level or I  | 1 | 240 | N | Pass        |
| 610094 | M | Sidamo Re Lower Tha      | 0 | 60  | N | Pass        |
| 610267 | M | South Regi Lower Tha     | 0 | 60  | N | Withdrawn   |
| 610272 | M | North Regi Lower Tha     | 0 | 60  | N | Pass        |

|        |   |             |             |   |     |   |             |
|--------|---|-------------|-------------|---|-----|---|-------------|
| 610273 | M | Sidamo Re   | A Level or  | 0 | 60  | N | Pass        |
| 610771 | M | Oromia Re   | A Level or  | 0 | 120 | N | Pass        |
| 610775 | M | Oromia Re   | A Level or  | 0 | 120 | N | Pass        |
| 610778 | M | Somalia Re  | A Level or  | 1 | 120 | N | Withdrawn   |
| 610992 | M | North Regi  | A Level or  | 0 | 210 | N | Pass        |
| 611185 | M | North Regi  | Lower Tha   | 0 | 120 | N | Pass        |
| 611245 | M | Tigrai Regi | Lower Tha   | 1 | 240 | N | Withdrawn   |
| 611350 | M | Tigrai Regi | A Level or  | 0 | 120 | N | Pass        |
| 611427 | M | North Regi  | Lower Tha   | 0 | 60  | N | Fail        |
| 611517 | M | Addis Abak  | Lower Tha   | 0 | 60  | N | Fail        |
| 611542 | M | North Regi  | A Level or  | 0 | 60  | Y | Distinction |
| 611581 | M | South Wes   | A Level or  | 0 | 60  | Y | Withdrawn   |
| 611595 | M | North Regi  | HE Qualific | 0 | 60  | N | Pass        |
| 611635 | M | Sidamo Re   | A Level or  | 0 | 60  | N | Pass        |
| 611714 | M | South Regi  | HE Qualific | 0 | 90  | N | Fail        |
| 611763 | M | Amhara Re   | Lower Tha   | 0 | 60  | N | Pass        |
| 611798 | M | Tigrai Regi | HE Qualific | 0 | 60  | N | Fail        |
| 611813 | M | South Regi  | Lower Tha   | 0 | 60  | N | Distinction |
| 611855 | M | South Wes   | Lower Tha   | 0 | 60  | N | Fail        |
| 611905 | M | Tigrai Regi | Lower Tha   | 0 | 60  | N | Withdrawn   |
| 612248 | M | Afar Regioi | HE Qualific | 0 | 90  | N | Pass        |
| 612254 | M | South Regi  | A Level or  | 0 | 90  | N | Withdrawn   |
| 612338 | M | South Regi  | A Level or  | 0 | 180 | N | Withdrawn   |
| 612506 | F | Afar Regioi | Lower Tha   | 0 | 75  | N | Fail        |
| 612528 | M | South Wes   | A Level or  | 0 | 120 | N | Pass        |
| 612530 | M | South Regi  | A Level or  | 0 | 120 | N | Distinction |
| 612535 | M | South Regi  | A Level or  | 0 | 120 | N | Distinction |
| 612538 | M | South Regi  | A Level or  | 0 | 120 | N | Distinction |
| 612539 | M | South Regi  | A Level or  | 0 | 120 | N | Pass        |
| 612540 | M | South Regi  | A Level or  | 0 | 120 | N | Distinction |
| 612542 | M | South Regi  | HE Qualific | 0 | 120 | N | Pass        |
| 612543 | F | South Regi  | A Level or  | 0 | 120 | N | Pass        |
| 612545 | F | South Regi  | A Level or  | 0 | 120 | N | Distinction |
| 612547 | M | South Regi  | A Level or  | 0 | 120 | N | Distinction |
| 612549 | M | South Regi  | A Level or  | 0 | 120 | N | Pass        |
| 612598 | M | Sidamo Re   | Lower Tha   | 0 | 60  | N | Fail        |
| 612607 | M | Afar Regioi | Lower Tha   | 0 | 60  | N | Fail        |
| 612638 | F | Addis Abak  | Lower Tha   | 0 | 60  | N | Withdrawn   |
| 612740 | M | Amhara Re   | A Level or  | 0 | 60  | N | Fail        |
| 612743 | M | Sidamo Re   | A Level or  | 0 | 60  | N | Fail        |
| 612880 | M | South Wes   | Lower Tha   | 0 | 60  | N | Withdrawn   |
| 612982 | M | Addis Abak  | Lower Tha   | 0 | 60  | N | Fail        |
| 613013 | M | Somalia Re  | Lower Tha   | 0 | 60  | N | Fail        |
| 613106 | M | North Regi  | A Level or  | 0 | 60  | N | Withdrawn   |
| 613146 | M | South Regi  | A Level or  | 0 | 60  | N | Withdrawn   |
| 613152 | M | Oromia Re   | A Level or  | 0 | 60  | Y | Fail        |
| 613226 | M | South Regi  | Lower Tha   | 0 | 60  | N | Withdrawn   |

|        |   |                         |   |     |   |             |
|--------|---|-------------------------|---|-----|---|-------------|
| 613255 | M | Oromia Re Lower Tha     | 0 | 60  | N | Pass        |
| 613281 | M | Addis Abak Lower Tha    | 0 | 60  | Y | Fail        |
| 613417 | M | Tigrai Regi Lower Tha   | 0 | 90  | N | Fail        |
| 613447 | M | Somalia Re Lower Tha    | 0 | 120 | Y | Fail        |
| 613459 | F | Somalia Re A Level or I | 0 | 60  | N | Fail        |
| 613461 | M | Afar Regio Lower Tha    | 0 | 90  | N | Pass        |
| 613464 | M | Addis Abak Lower Tha    | 0 | 60  | N | Pass        |
| 613574 | M | South Regi A Level or I | 0 | 60  | N | Fail        |
| 613593 | M | Oromia Re A Level or I  | 0 | 60  | N | Fail        |
| 613630 | F | Oromia Re Lower Tha     | 0 | 60  | N | Pass        |
| 613676 | M | Afar Regio Lower Tha    | 0 | 60  | N | Withdrawn   |
| 613677 | F | North Regi A Level or I | 0 | 90  | N | Fail        |
| 613717 | F | South Regi A Level or I | 0 | 90  | N | Withdrawn   |
| 613775 | M | Addis Abak Lower Tha    | 0 | 60  | N | Withdrawn   |
| 613865 | M | Addis Abak A Level or I | 0 | 60  | N | Pass        |
| 613900 | M | Somalia Re Lower Tha    | 0 | 60  | N | Pass        |
| 613928 | F | Amhara Re Lower Tha     | 0 | 60  | N | Fail        |
| 613952 | M | North Regi Lower Tha    | 0 | 60  | N | Pass        |
| 614059 | M | South Regi HE Qualific  | 0 | 90  | Y | Withdrawn   |
| 614083 | M | Amhara Re Lower Tha     | 0 | 60  | Y | Fail        |
| 614163 | M | South Wes A Level or I  | 0 | 60  | N | Pass        |
| 614172 | F | Sidamo Re A Level or I  | 0 | 120 | N | Withdrawn   |
| 614181 | M | Amhara Re HE Qualific   | 0 | 60  | N | Distinction |
| 614381 | F | Sidamo Re HE Qualific   | 0 | 60  | N | Withdrawn   |
| 614599 | M | South Regi Lower Tha    | 0 | 90  | N | Fail        |
| 614661 | F | South Wes A Level or I  | 0 | 60  | N | Withdrawn   |
| 614730 | M | South Wes Lower Tha     | 0 | 60  | Y | Withdrawn   |
| 614733 | M | Sidamo Re No Formal     | 0 | 120 | N | Fail        |
| 614764 | F | Sidamo Re A Level or I  | 0 | 60  | N | Pass        |
| 614801 | M | Sidamo Re Lower Tha     | 0 | 120 | N | Fail        |
| 614812 | M | North Regi A Level or I | 0 | 90  | N | Fail        |
| 614887 | M | Addis Abak Lower Tha    | 0 | 60  | N | Pass        |
| 614907 | M | Addis Abak Lower Tha    | 0 | 90  | N | Withdrawn   |
| 614973 | M | Somalia Re Lower Tha    | 0 | 90  | N | Fail        |
| 614984 | M | South Wes Lower Tha     | 0 | 60  | N | Withdrawn   |
| 614994 | M | South Wes A Level or I  | 0 | 60  | N | Fail        |
| 615225 | F | Somalia Re Lower Tha    | 0 | 60  | N | Pass        |
| 615241 | M | Sidamo Re A Level or I  | 0 | 60  | N | Pass        |
| 615426 | M | Somalia Re Lower Tha    | 0 | 60  | N | Withdrawn   |
| 615429 | M | North Regi HE Qualific  | 0 | 60  | N | Withdrawn   |
| 615439 | M | Addis Abak Lower Tha    | 0 | 60  | Y | Pass        |
| 616383 | M | North Regi A Level or I | 0 | 60  | N | Distinction |
| 616453 | F | Addis Abak Lower Tha    | 0 | 60  | N | Fail        |
| 616557 | M | Sidamo Re HE Qualific   | 0 | 60  | N | Withdrawn   |
| 616613 | M | South Wes Lower Tha     | 0 | 60  | Y | Withdrawn   |
| 616646 | M | Somalia Re A Level or I | 0 | 60  | N | Pass        |
| 616688 | M | Somalia Re A Level or I | 0 | 90  | N | Distinction |

|        |   |                          |   |     |   |           |
|--------|---|--------------------------|---|-----|---|-----------|
| 616789 | M | Sidamo Re A Level or I   | 0 | 60  | N | Pass      |
| 616794 | M | Afar Region Lower Tha    | 0 | 60  | N | Fail      |
| 616909 | M | Sidamo Re Lower Tha      | 0 | 120 | N | Fail      |
| 616913 | M | Sidamo Re Lower Tha      | 0 | 60  | N | Pass      |
| 617010 | F | Amhara Re A Level or I   | 0 | 60  | N | Withdrawn |
| 617014 | M | North Regi Lower Tha     | 0 | 120 | N | Pass      |
| 617015 | F | Sidamo Re A Level or I   | 0 | 60  | N | Withdrawn |
| 617018 | M | Sidamo Re Lower Tha      | 0 | 60  | N | Fail      |
| 617053 | M | South Regi A Level or I  | 0 | 60  | N | Fail      |
| 617130 | M | South Wes A Level or I   | 0 | 90  | N | Withdrawn |
| 617201 | M | South Wes Lower Tha      | 0 | 90  | N | Pass      |
| 617212 | M | South Regi A Level or I  | 0 | 60  | N | Withdrawn |
| 617255 | M | Sidamo Re Lower Tha      | 0 | 60  | N | Withdrawn |
| 617307 | F | Addis Abak Lower Tha     | 0 | 120 | N | Withdrawn |
| 617318 | M | Somalia Re Lower Tha     | 0 | 60  | Y | Pass      |
| 617343 | M | Sidamo Re A Level or I   | 0 | 90  | N | Withdrawn |
| 617358 | M | Oromia Re A Level or I   | 0 | 60  | Y | Withdrawn |
| 617382 | M | Afar Region Lower Tha    | 0 | 60  | N | Pass      |
| 617406 | M | Amhara Re Lower Tha      | 0 | 60  | N | Withdrawn |
| 617437 | M | South Wes A Level or I   | 0 | 60  | N | Withdrawn |
| 617534 | F | Somalia Re Lower Tha     | 0 | 60  | Y | Pass      |
| 617535 | M | Sidamo Re Lower Tha      | 0 | 60  | N | Fail      |
| 617540 | M | South Regi A Level or I  | 0 | 60  | N | Fail      |
| 617543 | M | Addis Abak A Level or I  | 0 | 120 | N | Withdrawn |
| 617557 | F | South Regi A Level or I  | 0 | 60  | N | Withdrawn |
| 617564 | F | Tigrai Regi Lower Tha    | 0 | 60  | N | Fail      |
| 617638 | M | Afar Region Lower Tha    | 0 | 60  | N | Withdrawn |
| 617647 | M | Sidamo Re No Formal      | 0 | 120 | N | Withdrawn |
| 617678 | F | Amhara Re A Level or I   | 0 | 60  | N | Pass      |
| 617734 | M | South Regi A Level or I  | 0 | 60  | N | Pass      |
| 617740 | M | Tigrai Regi A Level or I | 0 | 60  | N | Pass      |
| 617751 | M | Afar Region HE Qualific  | 0 | 60  | N | Pass      |
| 617805 | M | North Regi Lower Tha     | 0 | 60  | N | Pass      |
| 617824 | F | Addis Abak Lower Tha     | 0 | 60  | N | Withdrawn |
| 617829 | M | South Regi A Level or I  | 0 | 60  | Y | Pass      |
| 617847 | M | Addis Abak Lower Tha     | 0 | 90  | Y | Withdrawn |
| 617868 | M | Addis Abak Lower Tha     | 0 | 120 | Y | Pass      |
| 617945 | M | Oromia Re A Level or I   | 0 | 120 | N | Fail      |
| 617965 | M | North Regi Lower Tha     | 0 | 60  | N | Pass      |
| 617976 | M | Somalia Re A Level or I  | 0 | 60  | N | Pass      |
| 617998 | M | South Wes A Level or I   | 0 | 60  | N | Pass      |
| 618004 | M | South Wes Lower Tha      | 0 | 60  | N | Pass      |
| 618005 | M | Sidamo Re Lower Tha      | 0 | 60  | N | Pass      |
| 618015 | F | South Regi A Level or I  | 0 | 60  | N | Pass      |
| 618124 | M | South Wes Lower Tha      | 0 | 60  | N | Withdrawn |
| 618216 | F | Oromia Re A Level or I   | 0 | 60  | N | Pass      |
| 618279 | M | Amhara Re Lower Tha      | 0 | 90  | N | Fail      |

|        |   |                         |   |     |   |             |
|--------|---|-------------------------|---|-----|---|-------------|
| 618280 | M | Addis Abat A Level or I | 0 | 60  | N | Pass        |
| 618293 | M | South Regi HE Qualific  | 0 | 60  | N | Pass        |
| 618390 | M | Afar Regio Lower Than   | 0 | 75  | N | Fail        |
| 618397 | M | Addis Abak HE Qualific  | 0 | 60  | N | Pass        |
| 618412 | M | Afar Regio A Level or I | 0 | 60  | N | Pass        |
| 618513 | M | Sidamo Re A Level or I  | 0 | 60  | N | Pass        |
| 618519 | F | Afar Regio A Level or I | 0 | 60  | N | Pass        |
| 618590 | M | South Regi A Level or I | 0 | 90  | Y | Pass        |
| 618642 | F | Sidamo Re Lower Than    | 0 | 90  | N | Withdrawn   |
| 618662 | F | Oromia Re Lower Than    | 0 | 60  | N | Withdrawn   |
| 618665 | M | South Regi Lower Than   | 0 | 90  | N | Fail        |
| 618667 | M | South Wes Lower Than    | 0 | 60  | N | Fail        |
| 618684 | M | North Regi A Level or I | 0 | 60  | N | Withdrawn   |
| 618744 | M | Oromia Re Lower Than    | 0 | 90  | Y | Withdrawn   |
| 618843 | M | Addis Abak Lower Than   | 0 | 60  | N | Withdrawn   |
| 618848 | M | South Wes Lower Than    | 0 | 60  | N | Withdrawn   |
| 618875 | M | North Regi A Level or I | 0 | 60  | N | Pass        |
| 618903 | M | Amhara Re A Level or I  | 0 | 120 | N | Withdrawn   |
| 618914 | M | South Wes Lower Than    | 0 | 60  | Y | Pass        |
| 618925 | M | Amhara Re A Level or I  | 0 | 60  | N | Fail        |
| 618942 | M | North Regi Lower Than   | 0 | 90  | N | Withdrawn   |
| 619001 | M | Sidamo Re Lower Than    | 0 | 120 | N | Withdrawn   |
| 619112 | M | South Regi A Level or I | 0 | 60  | N | Withdrawn   |
| 619118 | M | Afar Regio A Level or I | 0 | 60  | N | Fail        |
| 619204 | F | South Regi Lower Than   | 0 | 90  | N | Withdrawn   |
| 619205 | M | Addis Abak Lower Than   | 0 | 60  | N | Withdrawn   |
| 619341 | F | Afar Regio Lower Than   | 0 | 60  | N | Pass        |
| 619410 | F | Tigrai Regi Lower Than  | 0 | 90  | N | Pass        |
| 619461 | M | Somalia Re A Level or I | 0 | 60  | N | Distinction |
| 619887 | M | Somalia Re Lower Than   | 0 | 180 | N | Withdrawn   |
| 619921 | M | Somalia Re Lower Than   | 0 | 120 | N | Withdrawn   |
| 619974 | M | Sidamo Re Lower Than    | 0 | 60  | Y | Withdrawn   |
| 620004 | M | Sidamo Re A Level or I  | 0 | 60  | Y | Withdrawn   |
| 620081 | M | Somalia Re A Level or I | 0 | 60  | N | Pass        |
| 620112 | M | Oromia Re Lower Than    | 0 | 60  | N | Withdrawn   |
| 620200 | M | South Regi HE Qualific  | 0 | 60  | N | Pass        |
| 620277 | F | South Wes A Level or I  | 0 | 75  | N | Fail        |
| 620320 | M | Amhara Re Lower Than    | 0 | 120 | Y | Fail        |
| 620337 | F | Addis Abak HE Qualific  | 0 | 120 | N | Withdrawn   |
| 620356 | M | North Regi A Level or I | 0 | 90  | N | Withdrawn   |
| 620364 | M | Addis Abak A Level or I | 0 | 60  | N | Withdrawn   |
| 620399 | M | South Regi A Level or I | 0 | 60  | N | Fail        |
| 620423 | M | Sidamo Re Lower Than    | 0 | 60  | N | Fail        |
| 620430 | M | South Regi A Level or I | 0 | 90  | N | Withdrawn   |
| 620473 | M | Addis Abak A Level or I | 0 | 60  | Y | Pass        |
| 620498 | F | South Regi Lower Than   | 0 | 90  | Y | Fail        |
| 620801 | M | South Wes Lower Than    | 0 | 120 | N | Pass        |



|        |   |                         |   |     |   |             |
|--------|---|-------------------------|---|-----|---|-------------|
| 620819 | M | South Wes A Level or I  | 0 | 60  | N | Pass        |
| 620933 | M | Sidamo Re A Level or I  | 0 | 60  | N | Fail        |
| 621345 | M | Amhara Re A Level or I  | 0 | 60  | N | Pass        |
| 621370 | M | South Regi A Level or I | 0 | 60  | N | Fail        |
| 621433 | M | Afar Regio A Level or I | 0 | 60  | N | Fail        |
| 621436 | M | Sidamo Re A Level or I  | 0 | 60  | N | Pass        |
| 621441 | F | Sidamo Re Lower Than    | 0 | 90  | N | Pass        |
| 621464 | M | Amhara Re A Level or I  | 0 | 120 | N | Fail        |
| 621475 | M | Afar Regio Lower Than   | 0 | 120 | N | Pass        |
| 621531 | M | Sidamo Re A Level or I  | 0 | 120 | N | Pass        |
| 621580 | F | Amhara Re A Level or I  | 0 | 60  | N | Pass        |
| 621675 | M | South Regi Lower Than   | 0 | 120 | N | Withdrawn   |
| 621682 | M | Somalia Re Lower Than   | 0 | 60  | N | Fail        |
| 621690 | M | South Wes A Level or I  | 0 | 60  | N | Fail        |
| 621696 | M | Sidamo Re A Level or I  | 0 | 90  | N | Pass        |
| 621698 | M | Somalia Re Lower Than   | 0 | 60  | N | Fail        |
| 621722 | F | South Wes HE Qualific   | 0 | 90  | N | Pass        |
| 621741 | M | Sidamo Re Lower Than    | 0 | 60  | N | Fail        |
| 621881 | M | Sidamo Re A Level or I  | 0 | 60  | N | Pass        |
| 621909 | M | Somalia Re A Level or I | 0 | 120 | N | Withdrawn   |
| 621952 | M | Addis Abak Lower Than   | 0 | 60  | N | Pass        |
| 621971 | F | South Regi A Level or I | 0 | 60  | N | Pass        |
| 621990 | M | South Regi Lower Than   | 0 | 60  | N | Withdrawn   |
| 621998 | M | South Wes Lower Than    | 0 | 60  | N | Pass        |
| 622038 | F | Amhara Re HE Qualific   | 0 | 150 | N | Withdrawn   |
| 622096 | M | South Regi Lower Than   | 0 | 60  | Y | Distinction |
| 622130 | F | Sidamo Re A Level or I  | 0 | 120 | N | Fail        |
| 622164 | M | Sidamo Re A Level or I  | 0 | 60  | N | Withdrawn   |
| 622218 | M | North Regi A Level or I | 0 | 60  | N | Withdrawn   |
| 622239 | M | Sidamo Re Lower Than    | 0 | 90  | N | Withdrawn   |
| 622278 | M | South Regi Lower Than   | 0 | 90  | N | Pass        |
| 622374 | M | Amhara Re HE Qualific   | 0 | 60  | N | Distinction |
| 622392 | M | North Regi No Formal    | 0 | 120 | N | Fail        |
| 622430 | M | Sidamo Re Lower Than    | 0 | 120 | N | Fail        |
| 622442 | F | Sidamo Re A Level or I  | 0 | 60  | N | Pass        |
| 622639 | F | South Wes Lower Than    | 0 | 90  | N | Withdrawn   |
| 622686 | M | South Regi Lower Than   | 0 | 60  | N | Distinction |
| 622701 | M | Amhara Re A Level or I  | 0 | 90  | Y | Pass        |
| 622859 | M | Addis Abak Lower Than   | 0 | 60  | N | Pass        |
| 622894 | M | Addis Abak Lower Than   | 0 | 60  | N | Withdrawn   |
| 622897 | M | Sidamo Re A Level or I  | 0 | 90  | N | Withdrawn   |
| 622899 | M | Sidamo Re Post Gradu    | 0 | 90  | N | Withdrawn   |
| 622918 | M | Oromia Re Lower Than    | 0 | 60  | Y | Withdrawn   |
| 622935 | M | Sidamo Re Lower Than    | 0 | 60  | N | Pass        |
| 622976 | M | Oromia Re Lower Than    | 0 | 60  | N | Pass        |
| 623138 | M | Tigrai Regi Lower Than  | 0 | 60  | N | Fail        |
| 623180 | M | South Regi Lower Than   | 0 | 90  | N | Pass        |

|        |   |                         |   |     |   |             |
|--------|---|-------------------------|---|-----|---|-------------|
| 623232 | M | South Wes Lower Thar    | 0 | 60  | Y | Withdrawn   |
| 623263 | M | Somalia Re Lower Thar   | 0 | 120 | N | Fail        |
| 623314 | M | Amhara Re Lower Thar    | 0 | 90  | N | Distinction |
| 623326 | M | South Regi A Level or I | 0 | 60  | N | Withdrawn   |
| 623352 | M | Addis Abak Lower Thar   | 0 | 150 | N | Withdrawn   |
| 623366 | M | South Wes Lower Thar    | 0 | 60  | N | Withdrawn   |
| 623419 | M | North Regi Lower Thar   | 0 | 90  | N | Fail        |
| 623433 | F | Somalia Re Lower Thar   | 0 | 60  | N | Pass        |
| 623438 | F | South Regi A Level or I | 0 | 60  | N | Pass        |
| 623456 | M | Addis Abak A Level or I | 0 | 90  | N | Fail        |
| 623474 | M | Amhara Re Lower Thar    | 0 | 60  | N | Fail        |
| 623496 | M | Addis Abak Lower Thar   | 0 | 60  | N | Fail        |
| 623537 | M | Afar Regio HE Qualific  | 0 | 60  | N | Pass        |
| 623542 | M | Amhara Re Lower Thar    | 0 | 90  | Y | Fail        |
| 623554 | M | Afar Regio Lower Thar   | 0 | 60  | N | Fail        |
| 623568 | F | Somalia Re Lower Thar   | 0 | 60  | N | Withdrawn   |
| 623579 | M | Amhara Re A Level or I  | 0 | 60  | N | Pass        |
| 623687 | F | Oromia Re A Level or I  | 0 | 90  | N | Pass        |
| 623786 | M | Sidamo Re A Level or I  | 0 | 90  | N | Fail        |
| 623917 | M | South Regi Lower Thar   | 0 | 120 | N | Withdrawn   |
| 623924 | M | North Regi Lower Thar   | 0 | 60  | N | Distinction |
| 623939 | M | Sidamo Re Lower Thar    | 0 | 60  | N | Withdrawn   |
| 623948 | M | South Wes HE Qualific   | 0 | 60  | N | Pass        |
| 624014 | M | South Wes Lower Thar    | 0 | 120 | N | Fail        |
| 624056 | M | Addis Abak A Level or I | 0 | 60  | N | Withdrawn   |
| 624152 | M | Oromia Re Lower Thar    | 0 | 120 | N | Fail        |
| 624178 | M | South Wes A Level or I  | 0 | 90  | N | Pass        |
| 624187 | M | Sidamo Re Lower Thar    | 0 | 60  | N | Withdrawn   |
| 624197 | F | South Regi Lower Thar   | 0 | 60  | N | Pass        |
| 624243 | M | South Regi Lower Thar   | 0 | 90  | Y | Withdrawn   |
| 624259 | M | Addis Abak Lower Thar   | 0 | 60  | N | Fail        |
| 624344 | M | South Wes A Level or I  | 0 | 60  | N | Pass        |
| 624376 | M | South Regi A Level or I | 0 | 60  | N | Withdrawn   |
| 624499 | M | South Wes Lower Thar    | 0 | 90  | N | Fail        |
| 624556 | M | South Regi Lower Thar   | 0 | 60  | N | Fail        |
| 624586 | M | South Regi A Level or I | 0 | 60  | N | Pass        |
| 624591 | M | Sidamo Re HE Qualific   | 0 | 120 | N | Pass        |
| 624718 | M | Afar Regio Lower Thar   | 0 | 60  | N | Withdrawn   |
| 624751 | M | South Wes A Level or I  | 0 | 60  | N | Pass        |
| 624763 | F | Somalia Re Lower Thar   | 0 | 60  | N | Pass        |
| 624772 | M | Somalia Re Lower Thar   | 0 | 60  | N | Withdrawn   |
| 624773 | M | Addis Abak Lower Thar   | 0 | 60  | N | Pass        |
| 624946 | M | North Regi Lower Thar   | 0 | 120 | N | Pass        |
| 624959 | M | Addis Abak Lower Thar   | 0 | 60  | N | Withdrawn   |
| 624967 | M | Afar Regio A Level or I | 0 | 60  | N | Withdrawn   |
| 624975 | F | Sidamo Re A Level or I  | 0 | 60  | N | Withdrawn   |
| 624981 | M | North Regi A Level or I | 0 | 120 | N | Pass        |

|        |   |                          |   |     |   |             |
|--------|---|--------------------------|---|-----|---|-------------|
| 625004 | M | Oromia Re Lower Tha      | 0 | 60  | N | Fail        |
| 625034 | M | Sidamo Re, A Level or I  | 0 | 120 | N | Withdrawn   |
| 625043 | M | Sidamo Re, HE Qualific   | 0 | 60  | N | Withdrawn   |
| 625073 | M | South Regi Lower Tha     | 0 | 60  | N | Fail        |
| 625075 | M | Sidamo Re, A Level or I  | 0 | 60  | N | Fail        |
| 625182 | M | Somalia Re Lower Tha     | 0 | 60  | N | Withdrawn   |
| 625191 | M | Somalia Re A Level or I  | 0 | 90  | N | Distinction |
| 625229 | F | Addis Abat A Level or I  | 0 | 60  | N | Withdrawn   |
| 625291 | M | South Regi HE Qualific   | 0 | 60  | N | Pass        |
| 625303 | M | South Regi Lower Tha     | 0 | 60  | N | Pass        |
| 625306 | M | Sidamo Re, A Level or I  | 0 | 60  | N | Pass        |
| 625341 | M | Amhara Re Lower Tha      | 0 | 120 | N | Withdrawn   |
| 625349 | M | Sidamo Re, Lower Tha     | 0 | 60  | N | Pass        |
| 625361 | M | South Regi A Level or I  | 0 | 60  | N | Fail        |
| 625373 | M | Amhara Re No Formal      | 0 | 120 | N | Withdrawn   |
| 625394 | M | Amhara Re A Level or I   | 0 | 60  | N | Fail        |
| 625406 | F | South Regi Lower Tha     | 0 | 60  | N | Pass        |
| 625500 | M | Sidamo Re, Lower Tha     | 0 | 60  | N | Fail        |
| 625536 | M | Amhara Re Lower Tha      | 0 | 60  | N | Pass        |
| 625548 | F | South Wes Lower Tha      | 0 | 60  | N | Pass        |
| 625566 | M | Sidamo Re, Lower Tha     | 0 | 60  | N | Distinction |
| 625588 | M | South Regi Lower Tha     | 0 | 60  | N | Pass        |
| 625609 | M | Amhara Re Lower Tha      | 0 | 60  | N | Withdrawn   |
| 625642 | F | Somalia Re A Level or I  | 0 | 60  | N | Fail        |
| 625667 | M | Afar Regioi Lower Tha    | 0 | 60  | N | Withdrawn   |
| 625753 | M | Somalia Re A Level or I  | 0 | 120 | N | Distinction |
| 625793 | M | South Wes A Level or I   | 0 | 90  | N | Withdrawn   |
| 625794 | M | Sidamo Re, A Level or I  | 0 | 120 | N | Pass        |
| 625800 | F | South Regi A Level or I  | 0 | 60  | N | Withdrawn   |
| 625812 | M | South Wes Lower Tha      | 0 | 60  | Y | Withdrawn   |
| 625828 | M | Addis Abat Lower Tha     | 0 | 60  | N | Withdrawn   |
| 625885 | M | Sidamo Re, Lower Tha     | 0 | 60  | N | Withdrawn   |
| 625903 | M | South Regi A Level or I  | 0 | 90  | N | Withdrawn   |
| 625977 | M | Somalia Re A Level or I  | 0 | 60  | N | Fail        |
| 625986 | M | Sidamo Re, A Level or I  | 0 | 120 | N | Withdrawn   |
| 625995 | M | Amhara Re A Level or I   | 0 | 90  | N | Fail        |
| 626047 | F | Sidamo Re, Lower Tha     | 0 | 60  | Y | Withdrawn   |
| 626103 | M | Oromia Re A Level or I   | 0 | 60  | N | Pass        |
| 626128 | M | Addis Abat A Level or I  | 0 | 60  | N | Distinction |
| 626174 | M | South Wes Lower Tha      | 0 | 60  | Y | Withdrawn   |
| 626198 | F | Amhara Re A Level or I   | 0 | 120 | Y | Pass        |
| 626231 | M | South Wes Lower Tha      | 0 | 90  | N | Pass        |
| 626259 | M | North Regi A Level or I  | 0 | 60  | N | Pass        |
| 626281 | M | South Regi A Level or I  | 0 | 90  | Y | Withdrawn   |
| 626320 | M | North Regi Lower Tha     | 0 | 60  | N | Withdrawn   |
| 626326 | F | South Wes A Level or I   | 0 | 60  | N | Distinction |
| 626349 | M | Afar Regioi A Level or I | 0 | 90  | N | Withdrawn   |

|        |   |             |              |   |     |   |             |
|--------|---|-------------|--------------|---|-----|---|-------------|
| 626403 | M | Tigrai Regi | Lower Tha    | 0 | 60  | N | Withdrawn   |
| 626419 | M | Somalia Re  | A Level or I | 0 | 60  | N | Distinction |
| 626422 | F | Sidamo Re   | HE Qualific  | 0 | 120 | N | Withdrawn   |
| 626448 | M | South Regi  | A Level or I | 0 | 60  | N | Distinction |
| 626469 | M | South Regi  | Lower Tha    | 0 | 120 | N | Fail        |
| 626473 | M | Sidamo Re   | A Level or I | 0 | 60  | N | Fail        |
| 626530 | M | Tigrai Regi | HE Qualific  | 0 | 60  | N | Fail        |
| 626537 | M | Sidamo Re   | HE Qualific  | 0 | 60  | N | Pass        |
| 626539 | M | South Regi  | Lower Tha    | 0 | 120 | N | Withdrawn   |
| 626644 | M | South Wes   | Lower Tha    | 0 | 60  | N | Pass        |
| 626692 | M | Addis Abak  | Lower Tha    | 0 | 60  | N | Withdrawn   |
| 626700 | F | Afar Regio  | HE Qualific  | 0 | 90  | N | Withdrawn   |
| 626765 | M | Somalia Re  | Lower Tha    | 0 | 90  | N | Pass        |
| 626777 | M | Amhara Re   | Lower Tha    | 0 | 90  | N | Withdrawn   |
| 626778 | M | Afar Regio  | Lower Tha    | 0 | 90  | N | Pass        |
| 626801 | F | Sidamo Re   | A Level or I | 0 | 60  | N | Fail        |
| 626828 | M | Afar Regio  | Lower Tha    | 0 | 60  | N | Pass        |
| 626875 | F | South Wes   | Lower Tha    | 0 | 60  | N | Withdrawn   |
| 626878 | M | South Wes   | A Level or I | 0 | 60  | N | Pass        |
| 626881 | M | Sidamo Re   | HE Qualific  | 0 | 60  | N | Pass        |
| 626890 | M | Addis Abak  | Lower Tha    | 0 | 120 | N | Pass        |
| 626987 | M | Amhara Re   | Lower Tha    | 0 | 60  | N | Pass        |
| 627022 | M | Oromia Re   | A Level or I | 0 | 60  | N | Pass        |
| 627026 | M | Afar Regio  | HE Qualific  | 0 | 60  | N | Withdrawn   |
| 627061 | M | Afar Regio  | HE Qualific  | 0 | 60  | N | Pass        |
| 627067 | M | Somalia Re  | A Level or I | 0 | 60  | N | Distinction |
| 627126 | M | Afar Regio  | Lower Tha    | 0 | 60  | N | Fail        |
| 627145 | M | South Regi  | Lower Tha    | 0 | 60  | N | Pass        |
| 627176 | F | Sidamo Re   | Lower Tha    | 0 | 90  | N | Fail        |
| 627238 | M | Afar Regio  | Lower Tha    | 0 | 60  | N | Withdrawn   |
| 627247 | M | South Wes   | A Level or I | 0 | 60  | N | Distinction |
| 627280 | M | Afar Regio  | A Level or I | 0 | 90  | N | Withdrawn   |
| 627307 | M | South Wes   | HE Qualific  | 0 | 90  | N | Pass        |
| 627333 | M | Oromia Re   | Lower Tha    | 0 | 120 | N | Withdrawn   |
| 627366 | M | Tigrai Regi | Lower Tha    | 0 | 120 | Y | Withdrawn   |
| 627379 | M | Sidamo Re   | Lower Tha    | 0 | 60  | N | Withdrawn   |
| 627383 | M | South Regi  | Lower Tha    | 0 | 60  | N | Withdrawn   |
| 627395 | M | Amhara Re   | HE Qualific  | 0 | 120 | N | Withdrawn   |
| 627417 | F | South Wes   | Post Gradu   | 0 | 60  | N | Distinction |
| 627442 | M | South Regi  | Lower Tha    | 0 | 60  | N | Pass        |
| 627468 | M | Addis Abak  | A Level or I | 0 | 60  | N | Pass        |
| 627521 | F | Somalia Re  | A Level or I | 0 | 60  | N | Distinction |
| 627522 | M | Sidamo Re   | Lower Tha    | 0 | 60  | N | Withdrawn   |
| 627524 | M | South Wes   | A Level or I | 0 | 120 | N | Withdrawn   |
| 627569 | M | South Regi  | A Level or I | 0 | 90  | N | Fail        |
| 627595 | M | Afar Regio  | HE Qualific  | 0 | 60  | N | Pass        |
| 627620 | M | Oromia Re   | Lower Tha    | 0 | 60  | N | Distinction |

|        |   |                         |   |     |   |             |
|--------|---|-------------------------|---|-----|---|-------------|
| 627622 | F | South Regi Lower Tha    | 0 | 60  | N | Pass        |
| 627651 | M | Sidamo Re Lower Tha     | 0 | 120 | Y | Withdrawn   |
| 627679 | M | Addis Abak Lower Tha    | 0 | 60  | N | Distinction |
| 627692 | M | North Regi Lower Tha    | 0 | 60  | N | Distinction |
| 627717 | F | Amhara Re A Level or I  | 0 | 90  | N | Distinction |
| 627727 | M | Addis Abak Lower Tha    | 0 | 60  | N | Withdrawn   |
| 627751 | M | Somalia Re A Level or I | 0 | 60  | N | Withdrawn   |
| 627808 | F | Addis Abak Lower Tha    | 0 | 120 | Y | Withdrawn   |
| 627840 | M | Amhara Re A Level or I  | 0 | 60  | N | Withdrawn   |
| 627847 | M | South Wes Post Gradu    | 0 | 60  | N | Withdrawn   |
| 627860 | M | Sidamo Re HE Qualific   | 0 | 90  | N | Pass        |
| 627886 | M | Amhara Re Lower Tha     | 0 | 60  | N | Pass        |
| 628004 | F | South Wes A Level or I  | 0 | 60  | N | Pass        |
| 628010 | M | South Regi A Level or I | 0 | 90  | N | Withdrawn   |
| 628034 | F | North Regi HE Qualific  | 0 | 60  | N | Pass        |
| 628038 | M | Somalia Re Lower Tha    | 0 | 90  | N | Fail        |
| 628058 | M | South Regi Lower Tha    | 0 | 60  | N | Pass        |
| 628098 | M | Sidamo Re A Level or I  | 0 | 60  | N | Pass        |
| 628110 | M | Sidamo Re A Level or I  | 0 | 60  | N | Fail        |
| 628114 | M | Afar Regio A Level or I | 0 | 60  | N | Pass        |
| 628117 | M | Sidamo Re A Level or I  | 0 | 60  | N | Pass        |
| 628140 | M | South Wes A Level or I  | 0 | 90  | N | Pass        |
| 628141 | M | South Wes Lower Tha     | 0 | 120 | N | Fail        |
| 628143 | F | Somalia Re A Level or I | 0 | 120 | N | Fail        |
| 628152 | M | Sidamo Re Lower Tha     | 0 | 60  | N | Pass        |
| 628174 | M | South Regi Lower Tha    | 0 | 60  | N | Pass        |
| 628296 | M | Sidamo Re A Level or I  | 0 | 120 | N | Withdrawn   |
| 628307 | M | South Regi Lower Tha    | 0 | 60  | N | Fail        |
| 628323 | M | South Wes Lower Tha     | 0 | 120 | N | Withdrawn   |
| 628361 | M | Afar Regio HE Qualific  | 0 | 60  | N | Distinction |
| 628370 | M | Sidamo Re A Level or I  | 0 | 60  | N | Fail        |
| 628443 | M | North Regi Lower Tha    | 0 | 60  | N | Pass        |
| 628476 | M | South Regi Lower Tha    | 0 | 60  | N | Withdrawn   |
| 628561 | M | South Regi A Level or I | 0 | 90  | N | Pass        |
| 628666 | M | Sidamo Re Lower Tha     | 0 | 120 | N | Withdrawn   |
| 628720 | M | Addis Abak A Level or I | 0 | 60  | N | Pass        |
| 628725 | M | North Regi Lower Tha    | 0 | 90  | N | Fail        |
| 628736 | F | South Regi Lower Tha    | 0 | 120 | N | Withdrawn   |
| 628803 | M | Sidamo Re A Level or I  | 0 | 90  | N | Fail        |
| 628837 | M | Somalia Re A Level or I | 0 | 60  | N | Fail        |
| 628841 | M | South Regi Lower Tha    | 0 | 120 | Y | Pass        |
| 628846 | M | South Wes A Level or I  | 0 | 90  | N | Withdrawn   |
| 628925 | F | Addis Abak A Level or I | 0 | 60  | N | Fail        |
| 628972 | M | South Wes Lower Tha     | 0 | 120 | N | Pass        |
| 628978 | M | South Regi A Level or I | 0 | 120 | N | Fail        |
| 628995 | M | Sidamo Re Lower Tha     | 0 | 60  | Y | Pass        |
| 629022 | M | North Regi Lower Tha    | 0 | 60  | N | Pass        |

|        |   |                          |   |     |   |             |
|--------|---|--------------------------|---|-----|---|-------------|
| 629096 | M | South Regi Lower Tha     | 0 | 60  | N | Pass        |
| 629119 | M | South Regi Lower Tha     | 0 | 60  | N | Fail        |
| 629120 | M | Afar Regio A Level or I  | 0 | 60  | N | Fail        |
| 629163 | F | South Regi A Level or I  | 0 | 60  | N | Withdrawn   |
| 629182 | M | Addis Abak A Level or I  | 0 | 60  | N | Withdrawn   |
| 629228 | M | Addis Abak A Level or I  | 0 | 60  | N | Withdrawn   |
| 629231 | M | Amhara Re No Formal      | 0 | 90  | N | Withdrawn   |
| 629244 | M | South Wes A Level or I   | 0 | 60  | N | Pass        |
| 629267 | M | North Regi Lower Tha     | 0 | 60  | N | Fail        |
| 629291 | M | Tigrai Regi A Level or I | 0 | 60  | N | Pass        |
| 629303 | M | Sidamo Re A Level or I   | 0 | 120 | N | Pass        |
| 629386 | M | Amhara Re A Level or I   | 0 | 60  | N | Fail        |
| 629404 | M | South Wes Lower Tha      | 0 | 90  | N | Withdrawn   |
| 629414 | M | Addis Abak A Level or I  | 0 | 90  | N | Pass        |
| 629459 | M | Afar Regio Lower Tha     | 0 | 60  | N | Withdrawn   |
| 629522 | M | South Regi Lower Tha     | 0 | 60  | N | Withdrawn   |
| 629540 | M | Tigrai Regi HE Qualific  | 0 | 60  | N | Pass        |
| 629541 | M | Somalia Re Lower Tha     | 0 | 60  | N | Pass        |
| 629543 | M | Sidamo Re HE Qualific    | 0 | 120 | N | Withdrawn   |
| 629603 | M | Somalia Re Lower Tha     | 0 | 60  | N | Pass        |
| 629613 | F | Sidamo Re Lower Tha      | 0 | 90  | N | Fail        |
| 629655 | F | Afar Regio Lower Tha     | 0 | 60  | N | Fail        |
| 629692 | M | Amhara Re A Level or I   | 0 | 120 | N | Pass        |
| 629693 | M | Sidamo Re A Level or I   | 0 | 120 | N | Pass        |
| 629735 | M | South Regi HE Qualific   | 0 | 60  | N | Withdrawn   |
| 629739 | M | Sidamo Re A Level or I   | 0 | 60  | N | Pass        |
| 629762 | M | South Wes Lower Tha      | 0 | 60  | N | Withdrawn   |
| 629767 | M | North Regi HE Qualific   | 0 | 60  | N | Fail        |
| 629867 | M | South Regi A Level or I  | 0 | 60  | N | Fail        |
| 629873 | M | Sidamo Re A Level or I   | 0 | 60  | N | Distinction |
| 629879 | M | Tigrai Regi Lower Tha    | 0 | 60  | Y | Fail        |
| 629881 | M | Amhara Re A Level or I   | 0 | 60  | N | Pass        |
| 629918 | M | Sidamo Re A Level or I   | 0 | 60  | N | Fail        |
| 629928 | F | South Regi Lower Tha     | 0 | 90  | N | Withdrawn   |
| 629938 | M | Addis Abak Lower Tha     | 0 | 60  | N | Pass        |
| 629993 | M | South Regi Lower Tha     | 0 | 60  | N | Fail        |
| 630013 | M | South Regi A Level or I  | 0 | 60  | N | Pass        |
| 630015 | M | South Wes A Level or I   | 0 | 60  | N | Distinction |
| 630032 | M | Somalia Re Lower Tha     | 0 | 60  | N | Withdrawn   |
| 630038 | M | Amhara Re A Level or I   | 0 | 60  | N | Fail        |
| 630045 | M | Amhara Re Lower Tha      | 0 | 60  | N | Pass        |
| 630083 | M | South Wes A Level or I   | 0 | 90  | N | Pass        |
| 630129 | F | South Wes Lower Tha      | 0 | 60  | N | Withdrawn   |
| 630168 | M | Oromia Re A Level or I   | 0 | 120 | Y | Withdrawn   |
| 630177 | M | Sidamo Re HE Qualific    | 0 | 60  | N | Distinction |
| 630264 | M | Addis Abak Lower Tha     | 0 | 60  | N | Pass        |
| 630269 | M | Sidamo Re HE Qualific    | 0 | 60  | N | Withdrawn   |

|        |   |                         |   |     |   |             |
|--------|---|-------------------------|---|-----|---|-------------|
| 630326 | M | South Regi A Level or I | 0 | 60  | Y | Pass        |
| 630426 | M | Afar Regio Lower Tha    | 0 | 60  | N | Fail        |
| 630435 | M | Sidamo Re No Formal     | 0 | 120 | N | Fail        |
| 630452 | M | South Regi A Level or I | 0 | 60  | N | Pass        |
| 630479 | M | Sidamo Re Lower Tha     | 0 | 60  | N | Pass        |
| 630488 | M | South Wes A Level or I  | 0 | 60  | N | Pass        |
| 630491 | M | South Regi Lower Tha    | 0 | 60  | N | Withdrawn   |
| 630574 | M | Amhara Re Lower Tha     | 0 | 60  | N | Withdrawn   |
| 630634 | M | Afar Regio HE Qualific  | 0 | 90  | Y | Pass        |
| 630653 | M | Addis Abak A Level or I | 0 | 60  | N | Pass        |
| 630654 | M | Addis Abak Lower Tha    | 0 | 90  | N | Fail        |
| 630655 | M | Afar Regio A Level or I | 0 | 60  | N | Pass        |
| 630671 | M | South Wes A Level or I  | 0 | 60  | N | Pass        |
| 630734 | M | North Regi Lower Tha    | 0 | 60  | N | Pass        |
| 630748 | M | South Regi A Level or I | 0 | 60  | N | Withdrawn   |
| 630759 | M | Sidamo Re No Formal     | 0 | 120 | N | Fail        |
| 630782 | M | Oromia Re A Level or I  | 0 | 60  | N | Withdrawn   |
| 630804 | M | Sidamo Re Lower Tha     | 0 | 120 | N | Withdrawn   |
| 630812 | M | South Regi Lower Tha    | 0 | 60  | N | Withdrawn   |
| 630830 | M | North Regi Lower Tha    | 0 | 60  | N | Pass        |
| 630854 | M | Sidamo Re Lower Tha     | 0 | 90  | N | Pass        |
| 630859 | M | Somalia Re Lower Tha    | 0 | 60  | Y | Pass        |
| 630867 | M | Addis Abak Lower Tha    | 0 | 120 | N | Fail        |
| 630868 | M | South Wes A Level or I  | 0 | 60  | N | Withdrawn   |
| 630870 | M | North Regi Lower Tha    | 0 | 120 | N | Withdrawn   |
| 630891 | M | Afar Regio A Level or I | 0 | 60  | N | Fail        |
| 630912 | M | Afar Regio A Level or I | 0 | 120 | N | Pass        |
| 630924 | M | Amhara Re Lower Tha     | 0 | 60  | N | Pass        |
| 630937 | M | South Wes A Level or I  | 0 | 60  | N | Distinction |
| 630950 | M | South Regi Lower Tha    | 0 | 60  | N | Withdrawn   |
| 630966 | M | Amhara Re A Level or I  | 0 | 60  | N | Pass        |
| 631023 | M | Addis Abak A Level or I | 0 | 90  | N | Pass        |
| 631075 | M | Afar Regio A Level or I | 0 | 90  | N | Withdrawn   |
| 631083 | M | Amhara Re A Level or I  | 0 | 60  | N | Fail        |
| 631099 | M | Somalia Re A Level or I | 0 | 60  | N | Fail        |
| 631104 | M | Addis Abak A Level or I | 0 | 60  | N | Pass        |
| 631111 | M | Sidamo Re Lower Tha     | 0 | 90  | N | Fail        |
| 631135 | F | South Wes A Level or I  | 0 | 60  | N | Fail        |
| 631195 | F | North Regi A Level or I | 0 | 60  | Y | Withdrawn   |
| 631235 | M | South Wes HE Qualific   | 0 | 60  | N | Pass        |
| 631247 | M | South Regi A Level or I | 0 | 60  | N | Pass        |
| 631300 | M | Addis Abak A Level or I | 0 | 90  | N | Fail        |
| 631311 | M | North Regi HE Qualific  | 0 | 60  | N | Pass        |
| 631327 | M | North Regi Lower Tha    | 0 | 60  | N | Pass        |
| 631365 | M | Amhara Re A Level or I  | 0 | 90  | N | Withdrawn   |
| 631467 | F | South Regi A Level or I | 0 | 60  | N | Pass        |
| 631473 | M | Sidamo Re Lower Tha     | 0 | 120 | N | Distinction |

|        |   |                          |   |     |   |             |
|--------|---|--------------------------|---|-----|---|-------------|
| 631524 | M | South Wes A Level or I   | 0 | 60  | Y | Withdrawn   |
| 631654 | M | South Regi Lower Thar    | 0 | 90  | N | Fail        |
| 631673 | M | Somalia Re Lower Thar    | 0 | 90  | N | Pass        |
| 631680 | F | North Regi Lower Thar    | 0 | 120 | N | Pass        |
| 631701 | M | Addis Abat No Formal     | 0 | 90  | N | Fail        |
| 631719 | F | Sidamo Re A Level or I   | 0 | 90  | N | Pass        |
| 631765 | M | Addis Abat Lower Thar    | 0 | 60  | N | Pass        |
| 631853 | M | South Wes A Level or I   | 0 | 90  | N | Pass        |
| 631860 | M | Tigrai Regi A Level or I | 0 | 60  | N | Distinction |
| 631880 | M | Somalia Re Lower Thar    | 0 | 60  | N | Pass        |
| 631884 | F | South Regi A Level or I  | 0 | 60  | N | Pass        |
| 631913 | M | South Wes A Level or I   | 0 | 60  | N | Fail        |
| 631925 | M | North Regi Lower Thar    | 0 | 90  | N | Withdrawn   |
| 632019 | M | Afar Regi A Level or I   | 0 | 90  | N | Fail        |
| 632044 | M | North Regi Lower Thar    | 0 | 60  | N | Pass        |
| 632078 | M | Afar Regi Post Gradu     | 0 | 60  | N | Fail        |
| 632114 | M | Sidamo Re A Level or I   | 0 | 90  | N | Fail        |
| 632124 | M | Somalia Re A Level or I  | 0 | 60  | N | Withdrawn   |
| 632143 | F | Sidamo Re A Level or I   | 0 | 60  | N | Fail        |
| 632235 | M | Sidamo Re A Level or I   | 0 | 90  | N | Withdrawn   |
| 632258 | F | Sidamo Re A Level or I   | 0 | 60  | N | Pass        |
| 632306 | M | Somalia Re HE Qualific   | 0 | 60  | N | Distinction |
| 632316 | M | South Regi A Level or I  | 0 | 60  | N | Pass        |
| 632339 | M | Amhara Re A Level or I   | 0 | 60  | N | Pass        |
| 632363 | M | South Wes A Level or I   | 0 | 60  | N | Fail        |
| 632379 | M | South Regi A Level or I  | 0 | 120 | Y | Pass        |
| 632380 | M | Somalia Re A Level or I  | 0 | 60  | N | Pass        |
| 632402 | F | Afar Regi HE Qualific    | 0 | 60  | N | Pass        |
| 632513 | M | Amhara Re A Level or I   | 0 | 60  | N | Distinction |
| 632544 | M | North Regi No Formal     | 0 | 60  | N | Pass        |
| 632588 | F | North Regi A Level or I  | 0 | 60  | N | Distinction |
| 632620 | M | Addis Abat HE Qualific   | 0 | 60  | N | Pass        |
| 632621 | M | Sidamo Re Lower Thar     | 0 | 60  | N | Withdrawn   |
| 632623 | M | North Regi No Formal     | 0 | 60  | N | Pass        |
| 632634 | M | Somalia Re A Level or I  | 0 | 60  | Y | Withdrawn   |
| 632691 | M | South Regi A Level or I  | 0 | 120 | N | Pass        |
| 632698 | M | South Regi Lower Thar    | 0 | 60  | N | Pass        |
| 632705 | M | South Regi Lower Thar    | 0 | 60  | N | Pass        |
| 632759 | M | South Wes Lower Thar     | 0 | 60  | N | Withdrawn   |
| 632773 | M | South Regi HE Qualific   | 0 | 90  | N | Withdrawn   |
| 632801 | M | Sidamo Re A Level or I   | 0 | 90  | N | Fail        |
| 632840 | F | Amhara Re A Level or I   | 0 | 60  | N | Fail        |
| 632841 | F | Addis Abat Lower Thar    | 0 | 60  | N | Withdrawn   |
| 632848 | M | Somalia Re HE Qualific   | 0 | 60  | N | Pass        |
| 632895 | M | Addis Abat A Level or I  | 0 | 60  | N | Pass        |
| 632923 | M | Sidamo Re A Level or I   | 0 | 60  | N | Withdrawn   |
| 632927 | M | North Regi A Level or I  | 0 | 60  | N | Fail        |



|        |   |                          |   |     |   |             |
|--------|---|--------------------------|---|-----|---|-------------|
| 632929 | M | Oromia Re A Level or I   | 0 | 60  | Y | Pass        |
| 632947 | M | Oromia Re Lower Tha      | 0 | 120 | N | Pass        |
| 632958 | M | North Regi HE Qualific   | 0 | 90  | N | Withdrawn   |
| 632991 | M | Sidamo Re HE Qualific    | 0 | 60  | N | Pass        |
| 633047 | M | Amhara Re A Level or I   | 0 | 60  | N | Pass        |
| 633077 | M | Addis Abak Lower Tha     | 0 | 60  | Y | Distinction |
| 633100 | F | South Wes Lower Tha      | 0 | 120 | N | Withdrawn   |
| 633102 | M | Addis Abak Lower Tha     | 0 | 60  | N | Withdrawn   |
| 633157 | M | South Regi A Level or I  | 0 | 120 | N | Fail        |
| 633179 | M | Amhara Re HE Qualific    | 0 | 60  | N | Distinction |
| 633205 | M | Somalia Re A Level or I  | 0 | 60  | N | Fail        |
| 633207 | M | North Regi Lower Tha     | 0 | 60  | N | Fail        |
| 633219 | M | South Wes Lower Tha      | 0 | 60  | N | Pass        |
| 633221 | M | Oromia Re Lower Tha      | 0 | 60  | Y | Fail        |
| 633233 | M | South Regi No Formal     | 0 | 60  | N | Withdrawn   |
| 633238 | F | Oromia Re Lower Tha      | 0 | 60  | N | Pass        |
| 633243 | M | Addis Abak Lower Tha     | 0 | 120 | N | Withdrawn   |
| 633292 | M | Addis Abak Lower Tha     | 0 | 60  | N | Fail        |
| 633297 | M | Afar Regioi Lower Tha    | 0 | 60  | N | Fail        |
| 633303 | M | Somalia Re Post Gradu    | 0 | 60  | N | Distinction |
| 633305 | M | Oromia Re Lower Tha      | 0 | 60  | N | Fail        |
| 633319 | M | Sidamo Re A Level or I   | 0 | 60  | N | Pass        |
| 633328 | F | Sidamo Re Post Gradu     | 0 | 60  | N | Pass        |
| 633388 | M | Sidamo Re HE Qualific    | 0 | 60  | N | Distinction |
| 633397 | M | South Regi A Level or I  | 0 | 120 | N | Fail        |
| 633401 | F | South Regi A Level or I  | 0 | 60  | N | Withdrawn   |
| 633403 | M | Oromia Re A Level or I   | 0 | 60  | N | Fail        |
| 633411 | M | South Regi A Level or I  | 0 | 60  | N | Fail        |
| 633504 | M | South Wes A Level or I   | 0 | 60  | N | Distinction |
| 633505 | M | South Regi Lower Tha     | 0 | 60  | N | Fail        |
| 633558 | M | North Regi Post Gradu    | 0 | 60  | N | Withdrawn   |
| 633625 | M | North Regi Lower Tha     | 0 | 60  | N | Withdrawn   |
| 633676 | M | Afar Regioi A Level or I | 0 | 60  | Y | Withdrawn   |
| 633691 | M | Addis Abak HE Qualific   | 0 | 60  | N | Pass        |
| 633717 | M | North Regi A Level or I  | 0 | 60  | N | Pass        |
| 633732 | M | Sidamo Re Lower Tha      | 0 | 60  | N | Withdrawn   |
| 633739 | M | Sidamo Re Lower Tha      | 0 | 60  | N | Withdrawn   |
| 633745 | F | Somalia Re A Level or I  | 0 | 60  | N | Pass        |
| 633756 | M | South Wes Lower Tha      | 0 | 60  | N | Pass        |
| 633773 | M | Afar Regioi Lower Tha    | 0 | 60  | N | Pass        |
| 633840 | M | Afar Regioi Lower Tha    | 0 | 60  | N | Fail        |
| 633881 | M | Addis Abak A Level or I  | 0 | 60  | Y | Withdrawn   |
| 633884 | M | Tigrai Regi Lower Tha    | 0 | 60  | N | Withdrawn   |
| 633924 | M | Sidamo Re HE Qualific    | 0 | 60  | N | Fail        |
| 633983 | M | Sidamo Re A Level or I   | 0 | 120 | N | Pass        |
| 634007 | M | Amhara Re A Level or I   | 0 | 60  | N | Withdrawn   |
| 634057 | M | South Wes No Formal      | 0 | 90  | N | Fail        |

|        |   |                         |   |     |   |             |
|--------|---|-------------------------|---|-----|---|-------------|
| 634070 | F | Oromia Re A Level or l  | 0 | 90  | N | Pass        |
| 634099 | M | Sidamo Re A Level or l  | 0 | 60  | N | Fail        |
| 634111 | M | Oromia Re HE Qualific   | 0 | 60  | N | Pass        |
| 634114 | M | Afar Regio Lower Thar   | 0 | 60  | Y | Withdrawn   |
| 634139 | M | South Regi A Level or l | 0 | 120 | N | Pass        |
| 634155 | M | Somalia Re Lower Thar   | 0 | 60  | N | Distinction |
| 634165 | M | Sidamo Re Lower Thar    | 0 | 90  | N | Pass        |
| 634176 | M | Oromia Re Lower Thar    | 0 | 90  | N | Withdrawn   |
| 634187 | M | South Regi A Level or l | 0 | 60  | N | Withdrawn   |
| 634200 | M | Afar Regio HE Qualific  | 0 | 60  | N | Fail        |
| 634209 | M | Oromia Re Lower Thar    | 0 | 90  | N | Pass        |
| 634245 | M | North Regi Lower Thar   | 0 | 60  | N | Fail        |
| 634252 | M | Somalia Re A Level or l | 0 | 60  | N | Fail        |
| 634254 | M | Amhara Re HE Qualific   | 0 | 60  | N | Withdrawn   |
| 634260 | M | Tigrai Regi Lower Thar  | 0 | 60  | N | Pass        |
| 634279 | M | Somalia Re A Level or l | 0 | 120 | N | Fail        |
| 634292 | M | Addis Abat A Level or l | 0 | 60  | N | Fail        |
| 634339 | M | Amhara Re A Level or l  | 0 | 90  | N | Withdrawn   |
| 634343 | M | North Regi Lower Thar   | 0 | 60  | N | Pass        |
| 634349 | M | Afar Regio A Level or l | 0 | 120 | N | Fail        |
| 634426 | M | South Regi A Level or l | 0 | 60  | N | Pass        |
| 634427 | M | South Regi A Level or l | 0 | 60  | N | Pass        |
| 634429 | F | South Regi A Level or l | 0 | 60  | N | Distinction |
| 634430 | F | Somalia Re A Level or l | 0 | 60  | N | Pass        |
| 634431 | M | Sidamo Re A Level or l  | 0 | 60  | N | Pass        |
| 634435 | M | South Regi A Level or l | 0 | 60  | N | Pass        |
| 634479 | M | South Wes HE Qualific   | 0 | 60  | N | Fail        |
| 634480 | F | Oromia Re Lower Thar    | 0 | 60  | N | Withdrawn   |
| 634500 | M | Sidamo Re A Level or l  | 0 | 120 | N | Pass        |
| 634536 | M | Somalia Re HE Qualific  | 0 | 60  | N | Pass        |
| 634539 | M | Sidamo Re A Level or l  | 0 | 60  | N | Fail        |
| 634616 | M | Sidamo Re Post Gradu    | 0 | 60  | N | Pass        |
| 634635 | F | Sidamo Re HE Qualific   | 0 | 60  | N | Fail        |
| 634636 | M | Sidamo Re A Level or l  | 0 | 60  | N | Pass        |
| 634638 | M | Oromia Re Lower Thar    | 0 | 60  | N | Fail        |
| 634682 | M | Amhara Re Lower Thar    | 0 | 60  | N | Fail        |
| 634701 | M | North Regi Lower Thar   | 0 | 60  | Y | Withdrawn   |
| 634774 | F | Afar Regio Lower Thar   | 0 | 60  | N | Withdrawn   |
| 634784 | M | Afar Regio A Level or l | 0 | 60  | N | Fail        |
| 634796 | M | Amhara Re Lower Thar    | 0 | 60  | N | Withdrawn   |
| 634820 | M | North Regi Lower Thar   | 0 | 60  | N | Withdrawn   |
| 634859 | F | Sidamo Re A Level or l  | 0 | 60  | N | Fail        |
| 634918 | M | Sidamo Re Lower Thar    | 0 | 120 | N | Fail        |
| 634919 | M | South Regi Lower Thar   | 0 | 60  | N | Pass        |
| 634924 | M | Afar Regio HE Qualific  | 0 | 60  | N | Distinction |
| 634946 | M | Sidamo Re A Level or l  | 0 | 60  | N | Withdrawn   |
| 634979 | M | Amhara Re A Level or l  | 0 | 60  | N | Withdrawn   |

|         |   |                            |   |     |   |             |
|---------|---|----------------------------|---|-----|---|-------------|
| 634999  | M | North Regi Lower Tha       | 0 | 60  | N | Distinction |
| 635034  | M | South Regi HE Qualific     | 0 | 90  | N | Pass        |
| 635046  | M | South Regi A Level or I    | 0 | 60  | N | Fail        |
| 635079  | M | Afar Regioi A Level or I   | 0 | 60  | N | Withdrawn   |
| 635124  | M | Oromia Re A Level or I     | 0 | 60  | N | Fail        |
| 1006742 | M | Afar Regioi HE Qualific    | 1 | 120 | N | Fail        |
| 1017773 | M | South Regi Lower Tha       | 0 | 60  | N | Fail        |
| 1045091 | M | Amhara Re A Level or I     | 0 | 60  | N | Fail        |
| 1072259 | M | Amhara Re HE Qualific      | 0 | 90  | N | Pass        |
| 1290731 | M | Amhara Re Lower Tha        | 0 | 90  | N | Withdrawn   |
| 1340760 | M | South Regi Lower Tha       | 0 | 60  | N | Pass        |
| 1398489 | M | North Regi Lower Tha       | 0 | 60  | N | Pass        |
| 1425806 | M | South Wes HE Qualific      | 0 | 90  | N | Pass        |
| 1450604 | M | North Regi A Level or I    | 0 | 90  | N | Withdrawn   |
| 1465407 | M | Somalia Re A Level or I    | 0 | 60  | N | Pass        |
| 1498823 | M | South Wes Lower Tha        | 2 | 150 | N | Fail        |
| 1514245 | M | Somalia Re Lower Tha       | 0 | 90  | N | Withdrawn   |
| 1526059 | M | South Regi HE Qualific     | 0 | 60  | N | Pass        |
| 1528232 | F | South Wes A Level or I     | 2 | 120 | N | Withdrawn   |
| 1548052 | F | South Wes A Level or I     | 0 | 60  | N | Fail        |
| 1578222 | M | Somalia Re HE Qualific     | 0 | 60  | N | Pass        |
| 1588621 | M | Amhara Re A Level or I     | 0 | 120 | N | Withdrawn   |
| 1615392 | M | Somalia Re Lower Tha       | 0 | 60  | N | Pass        |
| 1627052 | M | Afar Regioi HE Qualific    | 0 | 60  | N | Pass        |
| 1641117 | F | Oromia Re Lower Tha        | 0 | 120 | N | Pass        |
| 1683192 | M | Oromia Re A Level or I     | 0 | 60  | Y | Withdrawn   |
| 1683803 | F | Sidamo Re HE Qualific      | 0 | 120 | N | Pass        |
| 1738364 | M | South Regi HE Qualific     | 0 | 60  | N | Pass        |
| 1744817 | F | South Wes A Level or I     | 0 | 60  | N | Distinction |
| 1757662 | M | South Wes HE Qualific      | 0 | 60  | N | Pass        |
| 1768223 | M | Amhara Re Lower Tha        | 0 | 60  | N | Pass        |
| 1773925 | F | Tigrai Regioi HE Qualific  | 0 | 210 | N | Withdrawn   |
| 1799963 | M | South Wes HE Qualific      | 0 | 90  | N | Withdrawn   |
| 1821249 | M | South Regi Lower Tha       | 1 | 60  | N | Fail        |
| 1875728 | M | South Wes A Level or I     | 0 | 60  | N | Pass        |
| 1884024 | M | South Regi Lower Tha       | 0 | 60  | N | Fail        |
| 1892879 | M | Sidamo Re Lower Tha        | 0 | 120 | N | Fail        |
| 1919240 | M | Addis Abat Lower Tha       | 0 | 120 | N | Distinction |
| 1928947 | M | Tigrai Regioi A Level or I | 0 | 150 | N | Fail        |
| 1933534 | M | South Regi HE Qualific     | 1 | 120 | N | Fail        |
| 1936935 | M | Sidamo Re Lower Tha        | 1 | 60  | N | Withdrawn   |
| 1939193 | F | South Wes HE Qualific      | 0 | 60  | N | Fail        |
| 1961652 | F | South Wes Lower Tha        | 0 | 210 | N | Withdrawn   |
| 1962128 | F | Afar Regioi A Level or I   | 1 | 120 | N | Withdrawn   |
| 1984169 | M | Afar Regioi HE Qualific    | 0 | 60  | N | Withdrawn   |
| 1999952 | M | Afar Regioi HE Qualific    | 0 | 60  | N | Pass        |
| 2010245 | M | Amhara Re A Level or I     | 0 | 60  | N | Fail        |

|         |   |                          |   |     |   |             |
|---------|---|--------------------------|---|-----|---|-------------|
| 2022750 | M | Afar Region Lower Th     | 0 | 60  | N | Withdrawn   |
| 2025233 | M | Sidamo Re. A Level or I  | 0 | 120 | N | Pass        |
| 2055321 | M | South Wes HE Qualific    | 0 | 60  | N | Fail        |
| 2058815 | M | South Regi Lower Th      | 0 | 90  | N | Withdrawn   |
| 2074627 | M | Afar Region Lower Th     | 0 | 90  | N | Pass        |
| 2095576 | M | Oromia Re A Level or I   | 0 | 90  | N | Pass        |
| 2097046 | M | Tigrai Regi Lower Th     | 0 | 60  | N | Fail        |
| 2114529 | M | Addis Abak Lower Th      | 0 | 60  | N | Withdrawn   |
| 2131008 | M | Sidamo Re. A Level or I  | 0 | 60  | N | Pass        |
| 2156172 | M | South Regi A Level or I  | 0 | 60  | N | Withdrawn   |
| 2161710 | M | Tigrai Regi A Level or I | 2 | 60  | N | Withdrawn   |
| 2164266 | M | Addis Abak Lower Th      | 3 | 180 | Y | Fail        |
| 2176759 | M | Sidamo Re. HE Qualific   | 0 | 60  | N | Pass        |
| 2186992 | M | South Regi Lower Th      | 1 | 120 | Y | Distinction |
| 2209846 | M | Somalia Re Lower Th      | 0 | 60  | N | Withdrawn   |
| 2222615 | M | Tigrai Regi A Level or I | 0 | 90  | N | Pass        |
| 2238019 | M | North Regi Lower Th      | 0 | 60  | N | Fail        |
| 2239539 | M | Amhara Re HE Qualific    | 0 | 60  | N | Withdrawn   |
| 2242595 | M | Sidamo Re. Lower Th      | 3 | 60  | N | Fail        |
| 2242732 | M | South Wes HE Qualific    | 0 | 90  | N | Pass        |
| 2244285 | M | Addis Abak A Level or I  | 0 | 60  | N | Pass        |
| 2256318 | M | Sidamo Re. A Level or I  | 1 | 120 | Y | Pass        |
| 2257112 | M | South Regi Lower Th      | 0 | 60  | N | Distinction |
| 2264054 | M | Sidamo Re. Lower Th      | 0 | 60  | N | Pass        |
| 2265419 | M | South Wes A Level or I   | 0 | 60  | N | Withdrawn   |
| 2270880 | M | South Regi Lower Th      | 0 | 90  | Y | Pass        |
| 2298316 | F | Oromia Re Lower Th       | 0 | 120 | N | Withdrawn   |
| 2299808 | M | Tigrai Regi A Level or I | 0 | 60  | N | Distinction |
| 2303413 | F | Addis Abak A Level or I  | 0 | 120 | N | Pass        |
| 2306016 | M | Tigrai Regi HE Qualific  | 0 | 90  | N | Distinction |
| 2322813 | F | Afar Region A Level or I | 0 | 60  | N | Withdrawn   |
| 2327494 | M | Sidamo Re. Lower Th      | 1 | 90  | N | Pass        |
| 2336654 | M | Afar Region HE Qualific  | 0 | 60  | N | Fail        |
| 2337362 | M | Afar Region HE Qualific  | 0 | 90  | N | Pass        |
| 2345438 | M | South Wes Lower Th       | 0 | 90  | N | Pass        |
| 2355214 | F | Afar Region Post Gradu   | 2 | 90  | N | Fail        |
| 2360071 | M | Sidamo Re. HE Qualific   | 0 | 90  | N | Withdrawn   |
| 2381745 | M | Sidamo Re. Lower Th      | 3 | 180 | N | Withdrawn   |
| 2383307 | M | South Regi A Level or I  | 0 | 60  | N | Pass        |
| 2410519 | M | South Regi A Level or I  | 1 | 90  | N | Distinction |
| 2413895 | M | Afar Region Lower Th     | 1 | 90  | Y | Fail        |
| 2419081 | M | Amhara Re Lower Th       | 0 | 60  | N | Withdrawn   |
| 2426332 | M | Addis Abak HE Qualific   | 0 | 60  | N | Pass        |
| 2436584 | M | Oromia Re A Level or I   | 2 | 150 | N | Withdrawn   |
| 2437930 | M | Afar Region A Level or I | 1 | 120 | N | Pass        |
| 2448082 | F | Addis Abak Lower Th      | 0 | 60  | N | Fail        |
| 2462281 | F | Sidamo Re. A Level or I  | 0 | 60  | Y | Withdrawn   |

|         |   |                          |   |     |   |             |
|---------|---|--------------------------|---|-----|---|-------------|
| 2463282 | M | South Wes Lower Tha      | 1 | 240 | Y | Withdrawn   |
| 2465589 | M | Somalia Re Lower Tha     | 1 | 180 | N | Withdrawn   |
| 2480886 | F | Addis Abat A Level or I  | 0 | 60  | Y | Withdrawn   |
| 2481482 | M | Sidamo Re HE Qualific    | 0 | 60  | N | Pass        |
| 2492219 | M | Sidamo Re HE Qualific    | 0 | 60  | N | Pass        |
| 2492787 | M | Amhara Re Lower Tha      | 3 | 60  | N | Distinction |
| 2494338 | M | Amhara Re Lower Tha      | 0 | 60  | Y | Withdrawn   |
| 2503799 | M | Sidamo Re A Level or I   | 0 | 90  | N | Fail        |
| 2516163 | M | South Regi HE Qualific   | 0 | 60  | N | Distinction |
| 2517983 | M | Afar Regio A Level or I  | 1 | 150 | N | Withdrawn   |
| 2523915 | M | Sidamo Re HE Qualific    | 1 | 120 | N | Pass        |
| 2524794 | F | Sidamo Re HE Qualific    | 0 | 60  | N | Withdrawn   |
| 2525633 | F | Addis Abat A Level or I  | 0 | 60  | Y | Withdrawn   |
| 2532785 | F | Sidamo Re A Level or I   | 0 | 60  | N | Distinction |
| 2540424 | M | Somalia Re A Level or I  | 1 | 120 | N | Withdrawn   |
| 2543637 | M | Sidamo Re Lower Tha      | 0 | 60  | N | Fail        |
| 2545629 | F | Somalia Re A Level or I  | 0 | 60  | Y | Pass        |
| 2554552 | F | Tigrai Regi A Level or I | 0 | 60  | N | Pass        |
| 2558365 | M | Amhara Re A Level or I   | 0 | 90  | N | Withdrawn   |
| 2561313 | F | Amhara Re HE Qualific    | 0 | 90  | N | Pass        |
| 2561862 | M | South Wes HE Qualific    | 0 | 60  | N | Distinction |
| 2564619 | M | South Regi HE Qualific   | 0 | 120 | N | Pass        |
| 2569942 | F | South Regi A Level or I  | 0 | 60  | Y | Pass        |
| 2570929 | M | Addis Abat Lower Tha     | 0 | 60  | N | Pass        |
| 2575119 | M | South Wes A Level or I   | 2 | 60  | N | Fail        |
| 2581536 | M | Amhara Re A Level or I   | 0 | 60  | N | Pass        |
| 2581654 | M | Amhara Re A Level or I   | 0 | 120 | N | Pass        |
| 2583997 | M | South Regi Lower Tha     | 0 | 90  | N | Fail        |
| 2585330 | F | Afar Regio HE Qualific   | 0 | 60  | N | Pass        |
| 2589352 | M | Tigrai Regi Lower Tha    | 0 | 60  | N | Pass        |
| 2590531 | M | Sidamo Re Lower Tha      | 0 | 120 | N | Withdrawn   |
| 2593175 | M | North Regi Lower Tha     | 0 | 90  | N | Withdrawn   |
| 2595058 | M | South Regi A Level or I  | 0 | 60  | Y | Fail        |
| 2602542 | M | Afar Regio Post Gradu    | 1 | 120 | N | Withdrawn   |
| 2604975 | M | Afar Regio HE Qualific   | 0 | 60  | Y | Pass        |
| 2606636 | M | Amhara Re A Level or I   | 0 | 60  | N | Distinction |
| 2606890 | M | Sidamo Re A Level or I   | 0 | 60  | N | Pass        |
| 2609955 | M | Tigrai Regi HE Qualific  | 0 | 90  | N | Fail        |
| 2616978 | M | South Wes A Level or I   | 0 | 60  | N | Distinction |
| 2619719 | M | South Regi Lower Tha     | 0 | 60  | N | Withdrawn   |
| 2620930 | M | Sidamo Re A Level or I   | 0 | 60  | N | Distinction |
| 2625021 | M | South Regi Lower Tha     | 0 | 60  | N | Fail        |
| 2630284 | F | Somalia Re A Level or I  | 5 | 150 | N | Withdrawn   |
| 2634654 | M | Sidamo Re A Level or I   | 0 | 60  | N | Fail        |
| 2636921 | M | South Wes Lower Tha      | 0 | 60  | N | Withdrawn   |
| 2652268 | F | South Regi A Level or I  | 0 | 60  | N | Fail        |
| 2653007 | M | Afar Regio Lower Tha     | 0 | 90  | N | Fail        |

|         |   |                          |   |     |   |             |
|---------|---|--------------------------|---|-----|---|-------------|
| 2659650 | F | Amhara Re A Level or I   | 0 | 120 | N | Pass        |
| 2661827 | M | Addis Abak Lower Tha     | 0 | 60  | N | Pass        |
| 2666213 | M | Amhara Re HE Qualific    | 0 | 90  | N | Pass        |
| 2666831 | M | Amhara Re HE Qualific    | 0 | 120 | N | Pass        |
| 2667478 | M | Amhara Re Lower Tha      | 0 | 60  | N | Withdrawn   |
| 2674773 | M | Addis Abak HE Qualific   | 0 | 90  | N | Pass        |
| 2675061 | M | South Regi Lower Tha     | 1 | 90  | N | Fail        |
| 2681270 | M | South Regi A Level or I  | 0 | 120 | N | Pass        |
| 2684417 | M | Addis Abak Lower Tha     | 2 | 120 | Y | Withdrawn   |
| 2689210 | M | Sidamo Re Lower Tha      | 0 | 60  | Y | Pass        |
| 2697630 | M | Somalia Re HE Qualific   | 1 | 120 | N | Pass        |
| 2697885 | M | Oromia Re Lower Tha      | 1 | 180 | N | Pass        |
| 31296   | M | Somalia Re Lower Tha     | 1 | 60  | N | Fail        |
| 35747   | M | Amhara Re A Level or I   | 0 | 120 | N | Withdrawn   |
| 35796   | M | Tigrai Regi A Level or I | 0 | 60  | N | Fail        |
| 40857   | F | Amhara Re A Level or I   | 0 | 120 | Y | Withdrawn   |
| 40878   | M | Amhara Re Lower Tha      | 0 | 120 | N | Distinction |
| 42552   | F | Addis Abak A Level or I  | 0 | 90  | N | Pass        |
| 43958   | M | Tigrai Regi A Level or I | 1 | 60  | N | Fail        |
| 45423   | M | South Wes Lower Tha      | 0 | 60  | N | Fail        |
| 47861   | M | Oromia Re A Level or I   | 0 | 60  | Y | Pass        |
| 52275   | M | Sidamo Re No Formal      | 0 | 90  | N | Fail        |
| 54772   | M | South Regi Lower Tha     | 0 | 60  | N | Withdrawn   |
| 56637   | M | Somalia Re Lower Tha     | 0 | 90  | Y | Distinction |
| 56667   | M | Sidamo Re Lower Tha      | 2 | 120 | N | Fail        |
| 58884   | M | South Regi A Level or I  | 0 | 90  | Y | Distinction |
| 61297   | F | Somalia Re No Formal     | 0 | 180 | N | Withdrawn   |
| 63112   | M | Oromia Re Lower Tha      | 0 | 60  | N | Withdrawn   |
| 64427   | M | Sidamo Re A Level or I   | 0 | 60  | N | Distinction |
| 64777   | M | Amhara Re Lower Tha      | 1 | 90  | Y | Withdrawn   |
| 66892   | M | Sidamo Re A Level or I   | 1 | 60  | N | Withdrawn   |
| 69439   | M | Somalia Re Lower Tha     | 0 | 90  | N | Withdrawn   |
| 71159   | M | North Regi Lower Tha     | 0 | 60  | N | Pass        |
| 74165   | M | South Regi A Level or I  | 0 | 60  | N | Pass        |
| 75107   | M | North Regi Lower Tha     | 0 | 60  | N | Distinction |
| 77692   | M | Tigrai Regi HE Qualific  | 0 | 60  | N | Pass        |
| 77995   | M | Somalia Re A Level or I  | 0 | 60  | N | Pass        |
| 79610   | M | South Regi A Level or I  | 0 | 60  | N | Pass        |
| 80438   | M | Somalia Re A Level or I  | 0 | 120 | N | Pass        |
| 82201   | F | Sidamo Re Lower Tha      | 1 | 60  | N | Fail        |
| 84604   | F | North Regi A Level or I  | 0 | 90  | N | Distinction |
| 85241   | M | South Wes Lower Tha      | 0 | 120 | Y | Withdrawn   |
| 87264   | M | Oromia Re Lower Tha      | 0 | 60  | N | Distinction |
| 87322   | M | Tigrai Regi Lower Tha    | 0 | 120 | Y | Pass        |
| 90651   | M | South Regi A Level or I  | 0 | 120 | N | Withdrawn   |
| 91801   | M | Sidamo Re Lower Tha      | 1 | 60  | N | Withdrawn   |
| 94749   | M | Tigrai Regi Lower Tha    | 0 | 60  | N | Fail        |

|        |   |                          |   |     |   |             |
|--------|---|--------------------------|---|-----|---|-------------|
| 98256  | M | South Regi Lower Tha     | 0 | 120 | N | Withdrawn   |
| 101217 | M | Sidamo Re A Level or I   | 2 | 60  | Y | Fail        |
| 102854 | M | Oromia Re Lower Tha      | 0 | 60  | N | Distinction |
| 103594 | M | Tigrai Regi Lower Tha    | 0 | 180 | N | Withdrawn   |
| 105125 | M | Sidamo Re Lower Tha      | 0 | 60  | N | Withdrawn   |
| 105939 | M | North Regi A Level or I  | 0 | 60  | N | Pass        |
| 107455 | M | South Wes HE Qualific    | 0 | 120 | N | Fail        |
| 108949 | M | Amhara Re Lower Tha      | 2 | 60  | N | Fail        |
| 109577 | M | Amhara Re A Level or I   | 0 | 120 | N | Pass        |
| 109907 | F | Sidamo Re Lower Tha      | 0 | 120 | N | Withdrawn   |
| 110820 | M | Addis Abak A Level or I  | 0 | 60  | Y | Withdrawn   |
| 113702 | M | South Wes A Level or I   | 0 | 60  | N | Withdrawn   |
| 116529 | M | South Regi Lower Tha     | 1 | 120 | N | Fail        |
| 119310 | M | Amhara Re Lower Tha      | 0 | 150 | N | Pass        |
| 119865 | M | South Wes A Level or I   | 0 | 60  | N | Distinction |
| 125063 | M | Sidamo Re Lower Tha      | 0 | 60  | N | Fail        |
| 127179 | M | South Wes A Level or I   | 0 | 60  | N | Withdrawn   |
| 129907 | M | Addis Abak HE Qualific   | 0 | 60  | N | Distinction |
| 130409 | M | Oromia Re Lower Tha      | 0 | 60  | Y | Pass        |
| 131597 | M | Afar Regioi A Level or I | 0 | 430 | N | Pass        |
| 132423 | M | Sidamo Re A Level or I   | 0 | 240 | N | Withdrawn   |
| 132475 | F | Afar Regioi HE Qualific  | 0 | 60  | N | Pass        |
| 135280 | M | North Regi Lower Tha     | 0 | 120 | N | Distinction |
| 136944 | M | Afar Regioi A Level or I | 1 | 90  | N | Pass        |
| 139206 | M | Tigrai Regi Lower Tha    | 0 | 60  | N | Distinction |
| 142310 | M | Afar Regioi A Level or I | 0 | 180 | N | Pass        |
| 143755 | F | Somalia Re Lower Tha     | 0 | 60  | N | Pass        |
| 144959 | M | South Wes A Level or I   | 1 | 90  | N | Withdrawn   |
| 149178 | M | Sidamo Re A Level or I   | 0 | 60  | N | Pass        |
| 149964 | M | Addis Abak Lower Tha     | 0 | 240 | N | Withdrawn   |
| 150282 | M | South Wes A Level or I   | 0 | 60  | N | Pass        |
| 152524 | M | South Regi A Level or I  | 0 | 120 | N | Distinction |
| 152917 | M | Amhara Re A Level or I   | 0 | 150 | Y | Distinction |
| 155938 | M | South Regi A Level or I  | 0 | 60  | N | Pass        |
| 157225 | M | Oromia Re A Level or I   | 0 | 150 | N | Withdrawn   |
| 159906 | M | Somalia Re Lower Tha     | 0 | 60  | N | Pass        |
| 159947 | M | Tigrai Regi HE Qualific  | 0 | 120 | N | Fail        |
| 161837 | M | South Regi A Level or I  | 0 | 120 | Y | Withdrawn   |
| 164148 | F | North Regi A Level or I  | 0 | 60  | N | Pass        |
| 166123 | M | Addis Abak Lower Tha     | 0 | 60  | N | Pass        |
| 166607 | M | Afar Regioi A Level or I | 0 | 90  | N | Withdrawn   |
| 169596 | M | South Regi Lower Tha     | 2 | 90  | N | Fail        |
| 170874 | M | North Regi A Level or I  | 0 | 60  | N | Pass        |
| 171692 | F | Tigrai Regi A Level or I | 1 | 150 | N | Withdrawn   |
| 172493 | M | North Regi A Level or I  | 0 | 90  | N | Pass        |
| 173412 | M | North Regi HE Qualific   | 1 | 60  | N | Withdrawn   |
| 177492 | M | South Regi HE Qualific   | 0 | 60  | N | Distinction |

|        |   |                          |   |     |   |             |
|--------|---|--------------------------|---|-----|---|-------------|
| 184627 | F | Sidamo Re HE Qualific    | 4 | 240 | N | Withdrawn   |
| 184720 | M | Tigrai Regi Lower Tha    | 3 | 60  | N | Fail        |
| 185994 | M | Addis Abak A Level or I  | 0 | 60  | N | Pass        |
| 191504 | M | South Wes Lower Tha      | 0 | 90  | N | Withdrawn   |
| 194163 | M | Sidamo Re Lower Tha      | 0 | 90  | N | Pass        |
| 195246 | M | South Regi Lower Tha     | 0 | 60  | N | Fail        |
| 195552 | M | Sidamo Re A Level or I   | 1 | 120 | N | Pass        |
| 197188 | M | Amhara Re Lower Tha      | 0 | 120 | Y | Withdrawn   |
| 197536 | F | Sidamo Re A Level or I   | 0 | 90  | N | Pass        |
| 199009 | M | Afar Regio Lower Tha     | 0 | 90  | N | Pass        |
| 204117 | M | Sidamo Re Lower Tha      | 0 | 60  | Y | Withdrawn   |
| 226955 | M | Somalia Re A Level or I  | 0 | 60  | N | Fail        |
| 228633 | M | South Regi Lower Tha     | 0 | 110 | N | Pass        |
| 229498 | M | Afar Regio A Level or I  | 4 | 60  | N | Pass        |
| 230656 | M | North Regi Lower Tha     | 0 | 240 | N | Withdrawn   |
| 230947 | M | Amhara Re Lower Tha      | 0 | 90  | N | Fail        |
| 231980 | M | Oromia Re A Level or I   | 0 | 120 | N | Withdrawn   |
| 232173 | M | Amhara Re Lower Tha      | 0 | 60  | N | Pass        |
| 234031 | M | Tigrai Regi Lower Tha    | 0 | 60  | N | Withdrawn   |
| 234661 | M | South Regi Lower Tha     | 1 | 60  | N | Pass        |
| 235747 | M | South Wes A Level or I   | 0 | 60  | N | Withdrawn   |
| 235768 | M | South Wes A Level or I   | 0 | 60  | N | Pass        |
| 235971 | M | South Regi A Level or I  | 0 | 60  | N | Pass        |
| 236090 | F | Addis Abak Lower Tha     | 0 | 180 | N | Fail        |
| 237891 | M | Afar Regio A Level or I  | 1 | 120 | N | Pass        |
| 238301 | M | Amhara Re Lower Tha      | 0 | 240 | N | Withdrawn   |
| 242636 | M | South Regi A Level or I  | 0 | 120 | N | Fail        |
| 249357 | M | North Regi Post Gradu    | 0 | 60  | N | Pass        |
| 251166 | M | South Wes A Level or I   | 0 | 60  | N | Fail        |
| 251397 | M | Sidamo Re HE Qualific    | 0 | 120 | N | Withdrawn   |
| 251916 | M | South Regi Lower Tha     | 0 | 120 | N | Withdrawn   |
| 253633 | M | South Wes Lower Tha      | 0 | 60  | N | Pass        |
| 253763 | M | Tigrai Regi A Level or I | 0 | 90  | N | Distinction |
| 258245 | F | Amhara Re Lower Tha      | 0 | 60  | Y | Pass        |
| 258509 | M | Afar Regio HE Qualific   | 0 | 90  | N | Pass        |
| 258978 | F | South Regi A Level or I  | 1 | 60  | N | Pass        |
| 260275 | M | South Regi HE Qualific   | 0 | 120 | N | Withdrawn   |
| 261863 | M | Afar Regio Lower Tha     | 0 | 120 | N | Withdrawn   |
| 262025 | F | Afar Regio A Level or I  | 0 | 60  | N | Pass        |
| 262332 | M | Somalia Re Lower Tha     | 0 | 60  | N | Withdrawn   |
| 262394 | M | South Regi A Level or I  | 0 | 60  | N | Fail        |
| 263143 | F | Amhara Re A Level or I   | 0 | 60  | N | Withdrawn   |
| 263862 | M | South Regi A Level or I  | 0 | 60  | N | Distinction |
| 264589 | M | Afar Regio A Level or I  | 4 | 60  | N | Fail        |
| 265497 | M | Amhara Re HE Qualific    | 0 | 60  | N | Pass        |
| 268727 | F | South Regi A Level or I  | 0 | 120 | N | Withdrawn   |
| 268823 | M | Tigrai Regi No Formal    | 0 | 60  | N | Fail        |



|        |   |                         |   |     |   |             |
|--------|---|-------------------------|---|-----|---|-------------|
| 269584 | M | Afar Region A Level or  | 0 | 90  | N | Pass        |
| 270421 | F | South Regi A Level or   | 2 | 90  | N | Pass        |
| 271702 | M | South Regi Lower Tha    | 2 | 120 | N | Withdrawn   |
| 272704 | M | Somalia Re Lower Tha    | 0 | 60  | N | Withdrawn   |
| 275127 | M | Tigrai Regi A Level or  | 0 | 120 | N | Withdrawn   |
| 276265 | M | Afar Region A Level or  | 2 | 60  | Y | Pass        |
| 276337 | M | South Regi Lower Tha    | 1 | 120 | Y | Withdrawn   |
| 277384 | M | Sidamo Re Lower Tha     | 0 | 120 | N | Withdrawn   |
| 278380 | M | North Regi Lower Tha    | 0 | 60  | N | Pass        |
| 279440 | F | Afar Region HE Qualific | 0 | 60  | N | Pass        |
| 279653 | F | South Regi HE Qualific  | 0 | 120 | N | Distinction |
| 279883 | M | Somalia Re A Level or   | 0 | 180 | N | Withdrawn   |
| 281134 | F | Afar Region A Level or  | 0 | 90  | N | Pass        |
| 281970 | F | Oromia Re Lower Tha     | 0 | 120 | N | Withdrawn   |
| 282849 | M | Amhara Re A Level or    | 0 | 60  | N | Pass        |
| 283402 | M | Sidamo Re HE Qualific   | 0 | 60  | N | Pass        |
| 286778 | F | Tigrai Regi A Level or  | 0 | 60  | N | Distinction |
| 287079 | M | Sidamo Re HE Qualific   | 2 | 60  | N | Fail        |
| 287258 | M | Afar Region A Level or  | 0 | 60  | N | Pass        |
| 287715 | M | Somalia Re Lower Tha    | 0 | 60  | N | Withdrawn   |
| 289179 | M | Somalia Re A Level or   | 0 | 60  | N | Withdrawn   |
| 289247 | M | South Regi HE Qualific  | 0 | 90  | N | Distinction |
| 289618 | M | Tigrai Regi A Level or  | 1 | 60  | N | Withdrawn   |
| 289676 | M | Sidamo Re A Level or    | 1 | 60  | N | Fail        |
| 294112 | M | Afar Region A Level or  | 0 | 150 | N | Fail        |
| 294219 | F | Amhara Re A Level or    | 0 | 60  | N | Distinction |
| 294920 | M | Afar Region Post Gradu  | 0 | 60  | N | Withdrawn   |
| 294929 | M | Amhara Re A Level or    | 0 | 90  | N | Pass        |
| 295893 | M | Somalia Re A Level or   | 0 | 60  | Y | Fail        |
| 297218 | M | Sidamo Re A Level or    | 0 | 210 | N | Pass        |
| 297341 | F | Somalia Re A Level or   | 0 | 120 | Y | Pass        |
| 300848 | M | Somalia Re Lower Tha    | 0 | 240 | N | Withdrawn   |
| 301074 | M | South Regi Lower Tha    | 1 | 120 | N | Pass        |
| 301561 | M | South Wes Lower Tha     | 1 | 60  | N | Withdrawn   |
| 305064 | M | South Regi Lower Tha    | 0 | 180 | N | Pass        |
| 305659 | M | Oromia Re A Level or    | 0 | 90  | N | Distinction |
| 310205 | M | South Wes Lower Tha     | 1 | 60  | N | Fail        |
| 312126 | M | Addis Abak Lower Tha    | 0 | 60  | N | Withdrawn   |
| 312231 | M | Somalia Re HE Qualific  | 0 | 60  | N | Pass        |
| 312960 | M | Addis Abak HE Qualific  | 0 | 120 | N | Pass        |
| 315795 | M | South Regi Lower Tha    | 0 | 60  | N | Pass        |
| 316061 | M | Amhara Re Lower Tha     | 2 | 60  | Y | Withdrawn   |
| 316082 | M | Addis Abak A Level or   | 0 | 60  | N | Distinction |
| 318139 | M | Sidamo Re A Level or    | 0 | 120 | N | Withdrawn   |
| 318147 | M | Addis Abak Lower Tha    | 0 | 60  | N | Pass        |
| 318289 | M | Afar Region A Level or  | 2 | 60  | Y | Withdrawn   |
| 319073 | F | South Wes A Level or    | 0 | 120 | N | Pass        |

|        |   |                           |   |     |   |             |
|--------|---|---------------------------|---|-----|---|-------------|
| 319461 | M | South Regi Lower Tha      | 0 | 90  | N | Withdrawn   |
| 320133 | F | South Regi A Level or I   | 0 | 90  | N | Distinction |
| 320612 | M | Somalia Re HE Qualific    | 0 | 60  | N | Distinction |
| 322499 | M | Afar Regioi A Level or I  | 0 | 120 | N | Withdrawn   |
| 324331 | M | Amhara Re Lower Tha       | 1 | 60  | N | Fail        |
| 325750 | M | Afar Regioi HE Qualific   | 2 | 120 | N | Pass        |
| 327664 | F | Oromia Re Lower Tha       | 1 | 120 | N | Withdrawn   |
| 328377 | M | South Regi A Level or I   | 1 | 120 | N | Withdrawn   |
| 328797 | M | Afar Regioi HE Qualific   | 1 | 60  | N | Fail        |
| 329095 | M | South Wes Lower Tha       | 0 | 60  | N | Withdrawn   |
| 329895 | M | Addis Abak A Level or I   | 3 | 60  | N | Pass        |
| 331789 | M | Oromia Re Lower Tha       | 0 | 60  | N | Pass        |
| 332237 | M | South Regi HE Qualific    | 1 | 60  | N | Fail        |
| 332676 | M | Addis Abak Lower Tha      | 1 | 60  | Y | Withdrawn   |
| 333993 | M | Amhara Re A Level or I    | 0 | 60  | N | Pass        |
| 334224 | M | Amhara Re Lower Tha       | 2 | 60  | Y | Withdrawn   |
| 335095 | M | South Wes A Level or I    | 1 | 120 | N | Pass        |
| 337000 | M | South Wes Lower Tha       | 0 | 60  | N | Pass        |
| 338689 | M | South Regi HE Qualific    | 0 | 150 | N | Pass        |
| 338806 | M | North Regi Lower Tha      | 3 | 120 | N | Pass        |
| 339519 | M | Oromia Re Lower Tha       | 0 | 120 | N | Pass        |
| 340831 | M | South Regi A Level or I   | 0 | 120 | N | Withdrawn   |
| 341093 | M | South Wes A Level or I    | 2 | 120 | N | Fail        |
| 341457 | F | Afar Regioi HE Qualific   | 0 | 60  | N | Withdrawn   |
| 341629 | M | Tigrai Regio HE Qualific  | 0 | 150 | N | Fail        |
| 343709 | M | Amhara Re Lower Tha       | 0 | 60  | N | Pass        |
| 345271 | M | North Regi A Level or I   | 1 | 60  | N | Distinction |
| 347197 | M | Amhara Re Lower Tha       | 0 | 60  | N | Distinction |
| 348108 | M | Afar Regioi A Level or I  | 1 | 120 | N | Pass        |
| 348324 | M | South Wes Lower Tha       | 0 | 60  | N | Pass        |
| 348906 | M | Afar Regioi Lower Tha     | 0 | 60  | N | Withdrawn   |
| 349515 | M | South Regi Lower Tha      | 0 | 60  | N | Pass        |
| 349777 | M | Addis Abak A Level or I   | 0 | 90  | N | Withdrawn   |
| 351147 | M | Afar Regioi HE Qualific   | 0 | 60  | N | Pass        |
| 351293 | M | Tigrai Regio A Level or I | 2 | 60  | N | Withdrawn   |
| 354698 | M | North Regi Lower Tha      | 2 | 90  | N | Pass        |
| 354713 | M | North Regi A Level or I   | 0 | 60  | N | Fail        |
| 355293 | M | Somalia Re Lower Tha      | 2 | 60  | N | Pass        |
| 357851 | M | Addis Abak Lower Tha      | 2 | 120 | Y | Fail        |
| 360278 | M | Somalia Re Lower Tha      | 0 | 60  | N | Withdrawn   |
| 360752 | M | Oromia Re Lower Tha       | 0 | 60  | N | Withdrawn   |
| 364066 | M | Sidamo Re Lower Tha       | 2 | 150 | N | Distinction |
| 366140 | M | Sidamo Re Lower Tha       | 0 | 60  | N | Pass        |
| 367151 | M | Addis Abak A Level or I   | 0 | 60  | N | Withdrawn   |
| 368389 | M | Amhara Re Lower Tha       | 0 | 60  | N | Withdrawn   |
| 369242 | M | Oromia Re A Level or I    | 0 | 150 | N | Pass        |
| 369450 | M | Oromia Re Lower Tha       | 0 | 60  | N | Pass        |

|        |   |                         |   |     |   |             |
|--------|---|-------------------------|---|-----|---|-------------|
| 369644 | F | Sidamo Re Lower Tha     | 0 | 150 | N | Withdrawn   |
| 370735 | M | South Regi Lower Tha    | 0 | 60  | N | Pass        |
| 372345 | M | South Wes A Level or I  | 0 | 60  | N | Pass        |
| 372509 | M | South Regi A Level or I | 0 | 60  | N | Pass        |
| 372511 | M | North Regi HE Qualific  | 0 | 150 | N | Pass        |
| 374353 | F | Sidamo Re Lower Tha     | 0 | 150 | N | Withdrawn   |
| 375527 | M | South Regi A Level or I | 0 | 120 | N | Pass        |
| 375993 | F | Somalia Re Lower Tha    | 1 | 60  | N | Withdrawn   |
| 378705 | M | Sidamo Re Lower Tha     | 0 | 60  | N | Fail        |
| 378946 | M | Oromia Re Lower Tha     | 0 | 60  | N | Pass        |
| 379278 | M | Afar Regio HE Qualific  | 0 | 60  | N | Fail        |
| 379311 | M | Oromia Re Lower Tha     | 1 | 120 | N | Fail        |
| 379563 | M | South Wes A Level or I  | 0 | 60  | N | Withdrawn   |
| 380952 | F | Oromia Re Lower Tha     | 0 | 60  | N | Pass        |
| 381257 | F | Afar Regio A Level or I | 0 | 60  | N | Pass        |
| 381414 | M | Oromia Re Lower Tha     | 2 | 60  | N | Pass        |
| 381428 | M | South Regi Lower Tha    | 0 | 120 | Y | Withdrawn   |
| 381528 | F | Sidamo Re Lower Tha     | 0 | 60  | N | Withdrawn   |
| 381529 | M | South Wes A Level or I  | 0 | 60  | N | Withdrawn   |
| 383445 | M | Amhara Re A Level or I  | 0 | 60  | Y | Fail        |
| 383602 | F | South Regi Lower Tha    | 0 | 120 | N | Pass        |
| 383629 | M | South Regi Lower Tha    | 2 | 60  | N | Pass        |
| 384107 | M | Sidamo Re Lower Tha     | 0 | 60  | N | Fail        |
| 384331 | M | South Regi A Level or I | 0 | 60  | N | Withdrawn   |
| 386121 | M | Sidamo Re Lower Tha     | 0 | 180 | N | Withdrawn   |
| 386389 | M | North Regi Lower Tha    | 1 | 120 | N | Pass        |
| 386956 | F | Tigrai Regi Lower Tha   | 1 | 60  | Y | Withdrawn   |
| 389853 | M | Amhara Re A Level or I  | 1 | 60  | N | Withdrawn   |
| 390070 | M | North Regi A Level or I | 0 | 60  | N | Fail        |
| 393141 | M | Somalia Re Lower Tha    | 0 | 90  | Y | Fail        |
| 395758 | M | North Regi HE Qualific  | 1 | 60  | N | Withdrawn   |
| 396136 | M | Somalia Re Lower Tha    | 0 | 120 | N | Withdrawn   |
| 396683 | M | Afar Regio HE Qualific  | 0 | 120 | N | Pass        |
| 396834 | M | Oromia Re A Level or I  | 0 | 240 | N | Pass        |
| 396907 | M | Sidamo Re Lower Tha     | 1 | 60  | N | Fail        |
| 397219 | M | Afar Regio HE Qualific  | 0 | 60  | N | Distinction |
| 397292 | F | Amhara Re Lower Tha     | 1 | 60  | N | Fail        |
| 397671 | F | Addis Abak Lower Tha    | 0 | 90  | N | Distinction |
| 398550 | M | South Regi A Level or I | 2 | 90  | N | Distinction |
| 398630 | M | Addis Abak Lower Tha    | 0 | 60  | N | Pass        |
| 399429 | F | Somalia Re A Level or I | 1 | 60  | N | Distinction |
| 402695 | M | Somalia Re Lower Tha    | 2 | 90  | N | Pass        |
| 405193 | F | Somalia Re A Level or I | 1 | 60  | N | Pass        |
| 407232 | M | South Wes A Level or I  | 0 | 180 | N | Pass        |
| 408499 | F | Addis Abak A Level or I | 0 | 120 | Y | Withdrawn   |
| 408872 | M | Tigrai Regi Lower Tha   | 0 | 60  | Y | Withdrawn   |
| 410407 | M | South Regi HE Qualific  | 0 | 60  | N | Distinction |

|        |   |                          |   |     |   |             |
|--------|---|--------------------------|---|-----|---|-------------|
| 410883 | M | South Wes Lower Tha      | 0 | 60  | N | Pass        |
| 411304 | F | South Regi A Level or I  | 0 | 60  | N | Pass        |
| 411688 | M | Sidamo Re A Level or I   | 2 | 60  | N | Fail        |
| 412353 | M | South Regi A Level or I  | 0 | 60  | N | Pass        |
| 413180 | M | Sidamo Re A Level or I   | 1 | 120 | N | Pass        |
| 413709 | M | South Wes A Level or I   | 2 | 120 | N | Pass        |
| 413949 | F | Afar Regioi Lower Tha    | 0 | 60  | Y | Pass        |
| 416199 | M | South Regi Lower Tha     | 1 | 60  | N | Pass        |
| 416407 | M | North Regi Lower Tha     | 1 | 60  | N | Pass        |
| 416426 | M | Addis Abat HE Qualific   | 1 | 90  | N | Withdrawn   |
| 418201 | M | South Regi A Level or I  | 0 | 60  | N | Fail        |
| 418486 | M | Sidamo Re Lower Tha      | 2 | 240 | N | Withdrawn   |
| 419059 | M | South Regi Lower Tha     | 0 | 60  | N | Distinction |
| 419081 | F | Amhara Re A Level or I   | 0 | 90  | N | Fail        |
| 420834 | M | Afar Regioi HE Qualific  | 0 | 60  | N | Withdrawn   |
| 421070 | F | Afar Regioi HE Qualific  | 1 | 90  | N | Withdrawn   |
| 423210 | M | Afar Regioi A Level or I | 0 | 60  | N | Pass        |
| 423488 | M | Tigrai Regi Lower Tha    | 0 | 60  | N | Fail        |
| 423781 | M | South Wes A Level or I   | 0 | 90  | N | Pass        |
| 425467 | F | South Wes A Level or I   | 0 | 60  | Y | Withdrawn   |
| 426410 | M | Somalia Re Lower Tha     | 1 | 60  | N | Fail        |
| 427256 | M | South Regi Post Gradu    | 0 | 120 | N | Pass        |
| 427485 | M | South Wes Lower Tha      | 2 | 60  | N | Withdrawn   |
| 429832 | M | South Wes HE Qualific    | 2 | 90  | N | Fail        |
| 431139 | M | North Regi Lower Tha     | 0 | 120 | N | Pass        |
| 434476 | M | Sidamo Re A Level or I   | 2 | 120 | Y | Pass        |
| 435294 | F | Tigrai Regi Lower Tha    | 0 | 150 | Y | Withdrawn   |
| 438063 | M | Tigrai Regi A Level or I | 2 | 60  | Y | Fail        |
| 438644 | F | North Regi A Level or I  | 3 | 60  | N | Fail        |
| 439950 | M | South Wes Lower Tha      | 2 | 90  | N | Fail        |
| 439995 | M | Addis Abat A Level or I  | 3 | 60  | N | Pass        |
| 440818 | M | Afar Regioi Lower Tha    | 0 | 60  | N | Pass        |
| 441020 | F | South Regi HE Qualific   | 0 | 120 | N | Withdrawn   |
| 441165 | M | South Regi A Level or I  | 1 | 120 | Y | Pass        |
| 441170 | M | South Wes Lower Tha      | 1 | 120 | N | Withdrawn   |
| 441421 | M | South Wes Lower Tha      | 1 | 60  | N | Fail        |
| 441540 | M | Oromia Re Lower Tha      | 1 | 120 | N | Withdrawn   |
| 442199 | M | Addis Abat Lower Tha     | 0 | 60  | N | Pass        |
| 442347 | M | South Wes Lower Tha      | 1 | 120 | Y | Withdrawn   |
| 442563 | M | North Regi A Level or I  | 0 | 60  | N | Pass        |
| 442725 | M | Tigrai Regi A Level or I | 0 | 120 | N | Fail        |
| 442802 | M | South Wes A Level or I   | 0 | 60  | N | Pass        |
| 443151 | F | Addis Abat Lower Tha     | 0 | 120 | N | Pass        |
| 443514 | M | South Wes HE Qualific    | 0 | 90  | N | Pass        |
| 443696 | F | Sidamo Re A Level or I   | 3 | 180 | N | Fail        |
| 444011 | M | Addis Abat A Level or I  | 0 | 180 | Y | Pass        |
| 444619 | M | South Regi A Level or I  | 1 | 120 | N | Pass        |

|        |   |                          |   |     |   |             |
|--------|---|--------------------------|---|-----|---|-------------|
| 444907 | M | Somalia Re A Level or I  | 0 | 120 | N | Pass        |
| 445459 | M | Sidamo Re A Level or I   | 0 | 90  | Y | Withdrawn   |
| 445686 | M | South Wes A Level or I   | 0 | 90  | N | Pass        |
| 446778 | M | South Regi A Level or I  | 0 | 180 | N | Withdrawn   |
| 464522 | M | Addis Abak Lower Tha     | 1 | 120 | Y | Withdrawn   |
| 465009 | M | North Regi A Level or I  | 2 | 120 | N | Withdrawn   |
| 465078 | M | Sidamo Re Lower Tha      | 1 | 60  | Y | Withdrawn   |
| 465121 | M | Tigrai Regi A Level or I | 1 | 180 | N | Fail        |
| 465245 | M | Oromia Re Lower Tha      | 0 | 120 | N | Withdrawn   |
| 465294 | M | South Regi A Level or I  | 0 | 60  | N | Pass        |
| 466120 | M | Addis Abak Lower Tha     | 1 | 60  | N | Fail        |
| 466717 | M | South Regi Lower Tha     | 0 | 60  | N | Withdrawn   |
| 466807 | M | South Wes Lower Tha      | 1 | 60  | N | Withdrawn   |
| 466987 | M | North Regi Lower Tha     | 0 | 60  | N | Pass        |
| 467312 | M | Sidamo Re Lower Tha      | 1 | 60  | N | Withdrawn   |
| 467363 | M | South Wes A Level or I   | 0 | 60  | N | Fail        |
| 468623 | F | South Regi A Level or I  | 0 | 120 | N | Withdrawn   |
| 469499 | M | North Regi A Level or I  | 0 | 60  | N | Pass        |
| 470121 | M | Amhara Re A Level or I   | 0 | 60  | N | Withdrawn   |
| 471284 | M | Sidamo Re Lower Tha      | 1 | 60  | N | Fail        |
| 471374 | M | Tigrai Regi A Level or I | 0 | 150 | N | Withdrawn   |
| 472401 | M | North Regi A Level or I  | 0 | 180 | N | Withdrawn   |
| 474667 | M | Sidamo Re Lower Tha      | 1 | 60  | N | Pass        |
| 475015 | M | Tigrai Regi A Level or I | 1 | 60  | N | Pass        |
| 475566 | M | Sidamo Re HE Qualific    | 0 | 120 | N | Withdrawn   |
| 475699 | M | South Regi A Level or I  | 1 | 90  | N | Withdrawn   |
| 476401 | M | South Wes A Level or I   | 2 | 90  | N | Pass        |
| 476629 | F | Tigrai Regi Lower Tha    | 0 | 60  | N | Pass        |
| 477833 | M | Sidamo Re Lower Tha      | 1 | 60  | Y | Fail        |
| 479939 | F | North Regi No Formal     | 0 | 60  | N | Pass        |
| 480303 | M | Tigrai Regi Lower Tha    | 0 | 60  | N | Fail        |
| 481240 | M | Sidamo Re A Level or I   | 0 | 150 | N | Withdrawn   |
| 481717 | M | Amhara Re A Level or I   | 0 | 60  | N | Pass        |
| 482644 | M | Sidamo Re HE Qualific    | 0 | 60  | N | Pass        |
| 483037 | M | Sidamo Re No Formal      | 0 | 60  | N | Pass        |
| 483656 | F | Somalia Re Lower Tha     | 0 | 60  | N | Withdrawn   |
| 484010 | M | Addis Abak A Level or I  | 0 | 60  | N | Fail        |
| 484494 | M | South Wes Lower Tha      | 0 | 120 | N | Withdrawn   |
| 484594 | F | South Wes A Level or I   | 0 | 60  | N | Pass        |
| 485228 | F | Afar Regioi Lower Tha    | 0 | 60  | Y | Fail        |
| 486087 | M | Sidamo Re A Level or I   | 0 | 120 | N | Distinction |
| 486964 | M | Afar Regioi Lower Tha    | 0 | 120 | N | Pass        |
| 488136 | M | South Regi Lower Tha     | 2 | 60  | N | Withdrawn   |
| 488525 | M | North Regi A Level or I  | 1 | 120 | N | Pass        |
| 489048 | F | Sidamo Re A Level or I   | 0 | 60  | N | Withdrawn   |
| 489104 | F | Sidamo Re No Formal      | 0 | 60  | N | Withdrawn   |
| 489493 | F | Amhara Re A Level or I   | 0 | 60  | N | Withdrawn   |

|        |   |                          |   |     |   |             |
|--------|---|--------------------------|---|-----|---|-------------|
| 489553 | M | South Regi HE Qualific   | 1 | 60  | N | Fail        |
| 490297 | M | Afar Regio Lower Tha     | 0 | 150 | Y | Fail        |
| 491077 | M | South Regi Lower Tha     | 2 | 120 | N | Withdrawn   |
| 491126 | M | South Regi A Level or I  | 0 | 60  | Y | Pass        |
| 491756 | M | South Regi Lower Tha     | 2 | 90  | Y | Withdrawn   |
| 491863 | M | Amhara Re Lower Tha      | 0 | 90  | N | Pass        |
| 491959 | M | South Regi HE Qualific   | 0 | 60  | N | Withdrawn   |
| 492024 | M | Afar Regio Lower Tha     | 0 | 90  | N | Pass        |
| 492557 | M | Amhara Re Lower Tha      | 2 | 120 | N | Withdrawn   |
| 493793 | M | South Regi A Level or I  | 0 | 120 | Y | Pass        |
| 494046 | M | Sidamo Re Lower Tha      | 2 | 60  | N | Pass        |
| 494184 | M | South Wes Lower Tha      | 3 | 90  | N | Pass        |
| 496493 | F | Afar Regio A Level or I  | 0 | 60  | Y | Withdrawn   |
| 496815 | M | Tigrai Regi Lower Tha    | 2 | 150 | N | Withdrawn   |
| 497415 | M | South Wes A Level or I   | 0 | 60  | N | Pass        |
| 498442 | M | South Wes A Level or I   | 0 | 120 | N | Distinction |
| 499244 | M | South Regi Lower Tha     | 3 | 60  | N | Withdrawn   |
| 499404 | F | Amhara Re A Level or I   | 2 | 60  | N | Pass        |
| 500068 | M | South Regi Lower Tha     | 0 | 60  | N | Pass        |
| 500618 | M | Addis Abat A Level or I  | 0 | 120 | Y | Pass        |
| 501444 | M | South Regi Lower Tha     | 0 | 60  | N | Distinction |
| 501897 | M | South Regi A Level or I  | 0 | 150 | N | Withdrawn   |
| 502011 | F | Somalia Re Lower Tha     | 0 | 60  | N | Pass        |
| 503684 | M | Addis Abat Lower Tha     | 1 | 180 | N | Withdrawn   |
| 504270 | M | North Regi A Level or I  | 1 | 60  | N | Fail        |
| 504700 | M | South Wes A Level or I   | 2 | 60  | N | Withdrawn   |
| 505773 | M | Afar Regio HE Qualific   | 0 | 60  | N | Distinction |
| 506705 | M | South Wes A Level or I   | 0 | 120 | N | Pass        |
| 507031 | M | Afar Regio A Level or I  | 0 | 120 | N | Withdrawn   |
| 507311 | M | Oromia Re Lower Tha      | 0 | 120 | N | Fail        |
| 507743 | M | Oromia Re A Level or I   | 0 | 120 | N | Pass        |
| 507935 | M | Oromia Re A Level or I   | 0 | 60  | Y | Distinction |
| 508626 | M | Sidamo Re Lower Tha      | 0 | 60  | N | Pass        |
| 509177 | M | Sidamo Re Lower Tha      | 2 | 90  | N | Withdrawn   |
| 509536 | M | Somalia Re Lower Tha     | 0 | 60  | N | Pass        |
| 510762 | M | South Wes Lower Tha      | 0 | 60  | N | Fail        |
| 511246 | M | Oromia Re Lower Tha      | 0 | 60  | N | Fail        |
| 511309 | M | Tigrai Regi A Level or I | 1 | 60  | N | Pass        |
| 511350 | M | Sidamo Re Lower Tha      | 1 | 90  | Y | Fail        |
| 511859 | M | South Wes Lower Tha      | 0 | 120 | N | Withdrawn   |
| 511981 | M | Oromia Re Lower Tha      | 0 | 90  | N | Pass        |
| 512335 | M | South Wes A Level or I   | 4 | 60  | N | Withdrawn   |
| 513272 | F | Amhara Re Lower Tha      | 1 | 60  | N | Fail        |
| 513422 | F | Oromia Re A Level or I   | 0 | 120 | N | Pass        |
| 513428 | F | Tigrai Regi A Level or I | 2 | 90  | N | Pass        |
| 514078 | M | Amhara Re Lower Tha      | 0 | 60  | N | Pass        |
| 514556 | F | Somalia Re A Level or I  | 0 | 180 | N | Fail        |

|        |   |                          |   |     |   |             |
|--------|---|--------------------------|---|-----|---|-------------|
| 516602 | M | North Regi HE Qualific   | 0 | 60  | N | Distinction |
| 517551 | M | North Regi A Level or I  | 2 | 60  | N | Pass        |
| 518599 | M | Addis Abak Lower Thar    | 0 | 120 | N | Withdrawn   |
| 519115 | M | Amhara Re Lower Thar     | 0 | 90  | N | Fail        |
| 520265 | M | Sidamo Re Lower Thar     | 0 | 60  | N | Fail        |
| 521032 | M | Addis Abak Lower Thar    | 1 | 150 | N | Withdrawn   |
| 521115 | M | Amhara Re HE Qualific    | 0 | 120 | N | Pass        |
| 521153 | M | Tigrai Regi Lower Thar   | 0 | 60  | N | Fail        |
| 521255 | M | Sidamo Re Lower Thar     | 2 | 60  | N | Fail        |
| 521703 | M | Addis Abak Lower Thar    | 2 | 120 | N | Withdrawn   |
| 522082 | F | Amhara Re A Level or I   | 1 | 60  | N | Pass        |
| 523017 | M | Sidamo Re No Formal      | 0 | 60  | N | Pass        |
| 523249 | M | South Regi Lower Thar    | 0 | 120 | N | Pass        |
| 523589 | M | Sidamo Re A Level or I   | 0 | 120 | Y | Withdrawn   |
| 524827 | M | Amhara Re Lower Thar     | 0 | 60  | N | Withdrawn   |
| 525523 | M | Afar Regi HE Qualific    | 0 | 60  | N | Withdrawn   |
| 526721 | M | South Regi A Level or I  | 0 | 120 | N | Distinction |
| 526819 | M | Sidamo Re A Level or I   | 3 | 90  | N | Fail        |
| 527619 | M | South Wes A Level or I   | 1 | 90  | Y | Withdrawn   |
| 529693 | M | Afar Regi Lower Thar     | 1 | 60  | N | Pass        |
| 529991 | M | South Regi Lower Thar    | 4 | 60  | N | Pass        |
| 530148 | M | Afar Regi A Level or I   | 1 | 60  | N | Withdrawn   |
| 530196 | F | Somalia Re Lower Thar    | 1 | 90  | N | Withdrawn   |
| 531018 | F | Afar Regi HE Qualific    | 0 | 90  | N | Distinction |
| 531871 | M | Tigrai Regi HE Qualific  | 0 | 60  | N | Pass        |
| 532254 | M | Amhara Re A Level or I   | 4 | 120 | N | Pass        |
| 532744 | M | Addis Abak Lower Thar    | 0 | 120 | N | Withdrawn   |
| 533418 | M | South Regi A Level or I  | 0 | 60  | N | Distinction |
| 534018 | M | Addis Abak Lower Thar    | 0 | 120 | Y | Withdrawn   |
| 534112 | F | Tigrai Regi A Level or I | 0 | 60  | N | Withdrawn   |
| 534457 | F | Afar Regi HE Qualific    | 0 | 60  | Y | Pass        |
| 535542 | M | Afar Regi Lower Thar     | 0 | 150 | N | Withdrawn   |
| 535671 | F | Afar Regi HE Qualific    | 1 | 90  | N | Pass        |
| 535997 | F | Amhara Re Lower Thar     | 0 | 120 | N | Withdrawn   |
| 536351 | M | Oromia Re Lower Thar     | 0 | 120 | N | Pass        |
| 536475 | M | Tigrai Regi HE Qualific  | 0 | 60  | N | Fail        |
| 536963 | F | South Regi A Level or I  | 0 | 180 | N | Pass        |
| 537321 | M | South Regi Lower Thar    | 0 | 60  | N | Withdrawn   |
| 537322 | M | Afar Regi A Level or I   | 1 | 120 | N | Pass        |
| 537606 | F | Sidamo Re A Level or I   | 0 | 60  | N | Fail        |
| 537811 | F | Somalia Re A Level or I  | 0 | 120 | Y | Distinction |
| 539308 | M | South Regi A Level or I  | 1 | 90  | N | Fail        |
| 539913 | M | Sidamo Re Lower Thar     | 0 | 210 | N | Withdrawn   |
| 539945 | F | South Regi A Level or I  | 1 | 60  | N | Pass        |
| 540155 | M | Sidamo Re Lower Thar     | 1 | 180 | N | Withdrawn   |
| 540723 | M | South Regi Lower Thar    | 1 | 60  | N | Pass        |
| 541184 | M | North Regi A Level or I  | 0 | 120 | N | Withdrawn   |

|        |   |                          |   |     |   |             |
|--------|---|--------------------------|---|-----|---|-------------|
| 541532 | F | North Regi HE Qualific   | 0 | 330 | N | Withdrawn   |
| 541921 | M | Oromia Re HE Qualific    | 1 | 120 | N | Pass        |
| 542202 | M | South Regi A Level or I  | 0 | 60  | N | Pass        |
| 542550 | M | North Regi A Level or I  | 2 | 120 | N | Withdrawn   |
| 543010 | M | Addis Abat HE Qualific   | 2 | 120 | N | Fail        |
| 543432 | M | South Regi A Level or I  | 0 | 120 | N | Withdrawn   |
| 544141 | M | South Wes A Level or I   | 0 | 60  | N | Fail        |
| 544745 | M | South Regi A Level or I  | 1 | 90  | N | Fail        |
| 545164 | M | Oromia Re Lower Than     | 1 | 60  | N | Pass        |
| 545962 | F | Addis Abat HE Qualific   | 0 | 90  | N | Pass        |
| 546547 | F | Afar Regio Lower Than    | 1 | 60  | N | Pass        |
| 546645 | M | Tigrai Regi Lower Than   | 1 | 60  | N | Pass        |
| 547347 | M | Sidamo Re A Level or I   | 0 | 60  | N | Pass        |
| 549219 | M | Somalia Re A Level or I  | 1 | 60  | N | Pass        |
| 549321 | M | Amhara Re HE Qualific    | 0 | 90  | N | Distinction |
| 549523 | F | South Wes A Level or I   | 2 | 120 | Y | Fail        |
| 549847 | M | Oromia Re Lower Than     | 0 | 90  | N | Pass        |
| 550420 | M | North Regi A Level or I  | 0 | 60  | N | Distinction |
| 550703 | M | South Regi A Level or I  | 0 | 60  | N | Distinction |
| 552173 | M | Afar Regio Lower Than    | 0 | 60  | N | Pass        |
| 552832 | M | North Regi A Level or I  | 0 | 120 | N | Fail        |
| 553031 | M | South Regi A Level or I  | 0 | 60  | N | Pass        |
| 553284 | F | Somalia Re Lower Than    | 0 | 60  | N | Pass        |
| 553813 | M | South Regi Lower Than    | 1 | 60  | N | Pass        |
| 554063 | M | Tigrai Regi A Level or I | 0 | 180 | Y | Distinction |
| 554525 | M | South Wes A Level or I   | 0 | 60  | N | Pass        |
| 555049 | M | South Regi Lower Than    | 0 | 120 | N | Distinction |
| 555277 | M | South Regi Lower Than    | 0 | 60  | Y | Withdrawn   |
| 555827 | M | Sidamo Re Lower Than     | 0 | 60  | N | Fail        |
| 556126 | M | Sidamo Re A Level or I   | 2 | 60  | Y | Pass        |
| 557085 | F | Sidamo Re Lower Than     | 0 | 120 | N | Distinction |
| 557290 | M | Oromia Re Lower Than     | 1 | 90  | N | Pass        |
| 557792 | M | South Regi Lower Than    | 1 | 60  | N | Withdrawn   |
| 557830 | M | Amhara Re A Level or I   | 0 | 60  | N | Fail        |
| 558044 | M | North Regi Lower Than    | 0 | 90  | N | Distinction |
| 558342 | M | Sidamo Re Lower Than     | 0 | 120 | N | Fail        |
| 558764 | M | Somalia Re Lower Than    | 0 | 60  | N | Pass        |
| 559882 | M | South Regi Lower Than    | 0 | 120 | N | Withdrawn   |
| 560047 | M | Addis Abat A Level or I  | 0 | 60  | N | Pass        |
| 560459 | M | Sidamo Re A Level or I   | 1 | 60  | Y | Withdrawn   |
| 560645 | M | Afar Regio HE Qualific   | 0 | 60  | N | Pass        |
| 560659 | M | Somalia Re Lower Than    | 1 | 120 | N | Withdrawn   |
| 560765 | M | Somalia Re Lower Than    | 1 | 120 | Y | Withdrawn   |
| 560823 | M | South Wes A Level or I   | 1 | 120 | N | Withdrawn   |
| 561231 | F | Amhara Re Lower Than     | 0 | 60  | N | Pass        |
| 561311 | M | South Regi Lower Than    | 0 | 120 | Y | Withdrawn   |
| 561519 | M | Amhara Re Lower Than     | 0 | 60  | N | Withdrawn   |



|        |   |                          |   |     |   |             |
|--------|---|--------------------------|---|-----|---|-------------|
| 562064 | F | Amhara Re A Level or I   | 1 | 120 | N | Pass        |
| 562754 | M | Addis Abak A Level or I  | 0 | 150 | N | Pass        |
| 562762 | M | Sidamo Re Lower Than     | 2 | 120 | Y | Withdrawn   |
| 562990 | M | Addis Abak A Level or I  | 0 | 150 | N | Pass        |
| 563108 | F | Addis Abak Lower Than    | 0 | 60  | N | Pass        |
| 563414 | M | Somalia Re Lower Than    | 0 | 60  | N | Pass        |
| 564243 | M | Amhara Re Lower Than     | 0 | 90  | N | Pass        |
| 564617 | F | Addis Abak Lower Than    | 0 | 60  | N | Fail        |
| 564770 | M | South Wes Lower Than     | 2 | 90  | N | Fail        |
| 564821 | M | North Regi Lower Than    | 1 | 60  | N | Withdrawn   |
| 564933 | M | Addis Abak A Level or I  | 0 | 60  | N | Distinction |
| 565017 | M | South Regi Lower Than    | 0 | 60  | N | Pass        |
| 565474 | M | Somalia Re Lower Than    | 0 | 60  | N | Withdrawn   |
| 566823 | M | Sidamo Re A Level or I   | 1 | 60  | N | Fail        |
| 567213 | M | South Regi A Level or I  | 1 | 60  | N | Withdrawn   |
| 568443 | F | Amhara Re Lower Than     | 0 | 120 | Y | Withdrawn   |
| 568447 | M | South Regi Lower Than    | 0 | 60  | N | Withdrawn   |
| 568987 | F | South Regi A Level or I  | 1 | 90  | N | Fail        |
| 568998 | M | South Regi A Level or I  | 1 | 60  | Y | Withdrawn   |
| 569034 | F | Amhara Re Lower Than     | 0 | 60  | N | Pass        |
| 569080 | M | Sidamo Re A Level or I   | 0 | 90  | N | Pass        |
| 569108 | M | Oromia Re A Level or I   | 0 | 90  | Y | Distinction |
| 569556 | F | North Regi A Level or I  | 2 | 180 | N | Withdrawn   |
| 569745 | M | Addis Abak Lower Than    | 0 | 60  | N | Withdrawn   |
| 569876 | M | North Regi HE Qualific   | 0 | 90  | N | Pass        |
| 570004 | M | Addis Abak Lower Than    | 1 | 60  | Y | Fail        |
| 570213 | M | South Regi A Level or I  | 1 | 60  | N | Fail        |
| 570280 | M | South Wes A Level or I   | 1 | 120 | N | Fail        |
| 570689 | M | Somalia Re A Level or I  | 1 | 60  | N | Fail        |
| 571074 | F | Oromia Re A Level or I   | 0 | 120 | N | Distinction |
| 571932 | M | Oromia Re Lower Than     | 0 | 120 | Y | Withdrawn   |
| 571950 | M | Amhara Re No Formal      | 0 | 270 | N | Withdrawn   |
| 572071 | M | Somalia Re Lower Than    | 1 | 60  | N | Fail        |
| 572074 | F | South Wes A Level or I   | 0 | 60  | N | Pass        |
| 572213 | F | Addis Abak HE Qualific   | 1 | 60  | N | Distinction |
| 572265 | M | Sidamo Re A Level or I   | 1 | 90  | N | Fail        |
| 572804 | M | Tigrai Regi A Level or I | 1 | 60  | N | Withdrawn   |
| 573007 | M | South Wes Lower Than     | 1 | 90  | N | Withdrawn   |
| 573291 | M | South Regi A Level or I  | 1 | 60  | N | Withdrawn   |
| 573481 | M | South Wes A Level or I   | 1 | 120 | N | Withdrawn   |
| 573583 | M | Afar Regio Lower Than    | 0 | 60  | N | Pass        |
| 573697 | F | South Regi HE Qualific   | 1 | 60  | N | Withdrawn   |
| 574068 | M | South Regi A Level or I  | 0 | 90  | N | Withdrawn   |
| 574527 | M | Sidamo Re Lower Than     | 0 | 60  | Y | Fail        |
| 574638 | M | Somalia Re Lower Than    | 0 | 120 | N | Withdrawn   |
| 574695 | M | Afar Regio Lower Than    | 1 | 120 | N | Withdrawn   |
| 575069 | M | Addis Abak Lower Than    | 0 | 180 | N | Pass        |

|        |   |                          |   |     |   |             |
|--------|---|--------------------------|---|-----|---|-------------|
| 575112 | M | Sidamo Re, A Level or I  | 0 | 60  | N | Pass        |
| 575302 | M | North Regi Lower Tha     | 0 | 90  | N | Pass        |
| 575685 | M | Sidamo Re, A Level or I  | 1 | 60  | N | Fail        |
| 575710 | M | Amhara Re HE Qualific    | 0 | 120 | N | Withdrawn   |
| 575983 | M | South Wes Lower Tha      | 0 | 120 | N | Withdrawn   |
| 576140 | F | North Regi Lower Tha     | 0 | 60  | N | Withdrawn   |
| 576423 | M | Sidamo Re, A Level or I  | 1 | 120 | N | Withdrawn   |
| 577032 | M | Oromia Re Lower Tha      | 0 | 60  | Y | Fail        |
| 577429 | M | Afar Regio HE Qualific   | 0 | 180 | N | Fail        |
| 577533 | M | Somalia Re A Level or I  | 1 | 90  | N | Pass        |
| 577950 | M | Oromia Re Lower Tha      | 0 | 90  | N | Withdrawn   |
| 578152 | M | Tigrai Regi Lower Tha    | 1 | 60  | N | Pass        |
| 578495 | M | Oromia Re HE Qualific    | 0 | 60  | N | Withdrawn   |
| 578573 | M | Tigrai Regi Lower Tha    | 0 | 60  | N | Withdrawn   |
| 578847 | M | South Wes A Level or I   | 0 | 60  | Y | Distinction |
| 579221 | F | Afar Regio Lower Tha     | 0 | 60  | Y | Withdrawn   |
| 579660 | M | Sidamo Re, Lower Tha     | 0 | 60  | N | Pass        |
| 579686 | M | Tigrai Regi A Level or I | 0 | 90  | N | Pass        |
| 580459 | M | North Regi A Level or I  | 0 | 60  | N | Pass        |
| 580834 | M | Addis Abak Lower Tha     | 0 | 60  | N | Distinction |
| 580845 | M | Afar Regio HE Qualific   | 0 | 120 | N | Pass        |
| 580926 | M | Amhara Re Lower Tha      | 2 | 120 | Y | Fail        |
| 581219 | M | Amhara Re Lower Tha      | 1 | 60  | N | Fail        |
| 581253 | M | South Regi Lower Tha     | 1 | 120 | N | Pass        |
| 581659 | F | South Regi Lower Tha     | 0 | 60  | N | Distinction |
| 581779 | F | Afar Regio A Level or I  | 0 | 60  | N | Pass        |
| 582034 | M | Sidamo Re, Lower Tha     | 0 | 60  | N | Withdrawn   |
| 582117 | M | South Wes Lower Tha      | 0 | 60  | N | Pass        |
| 582141 | M | South Regi A Level or I  | 0 | 90  | N | Fail        |
| 582266 | M | South Wes Lower Tha      | 0 | 150 | N | Fail        |
| 582332 | M | Afar Regio Post Gradu    | 0 | 60  | N | Distinction |
| 582530 | M | Amhara Re HE Qualific    | 1 | 150 | N | Fail        |
| 582653 | M | South Regi A Level or I  | 0 | 60  | N | Pass        |
| 582670 | M | South Regi Lower Tha     | 0 | 60  | Y | Fail        |
| 582749 | M | South Regi Lower Tha     | 0 | 90  | N | Withdrawn   |
| 583056 | M | South Wes A Level or I   | 1 | 60  | N | Fail        |
| 583318 | M | South Regi A Level or I  | 0 | 90  | Y | Pass        |
| 583487 | M | Afar Regio Lower Tha     | 0 | 60  | N | Pass        |
| 584210 | M | South Wes Lower Tha      | 1 | 60  | N | Withdrawn   |
| 584362 | M | South Regi A Level or I  | 1 | 120 | N | Withdrawn   |
| 584515 | F | Sidamo Re, A Level or I  | 0 | 60  | N | Pass        |
| 584594 | M | Oromia Re A Level or I   | 1 | 60  | N | Withdrawn   |
| 584673 | M | Sidamo Re, A Level or I  | 1 | 90  | N | Fail        |
| 585021 | M | Amhara Re A Level or I   | 0 | 180 | N | Withdrawn   |
| 585224 | M | Tigrai Regi Lower Tha    | 1 | 60  | N | Pass        |
| 585261 | M | Amhara Re HE Qualific    | 0 | 60  | N | Pass        |
| 585284 | M | Sidamo Re, Lower Tha     | 0 | 120 | N | Pass        |

|        |   |                          |   |     |   |             |
|--------|---|--------------------------|---|-----|---|-------------|
| 585301 | M | North Regi A Level or I  | 1 | 120 | N | Withdrawn   |
| 585503 | M | North Regi HE Qualific   | 0 | 120 | N | Distinction |
| 585572 | M | Somalia Re Lower Tha     | 0 | 120 | N | Fail        |
| 585724 | M | Sidamo Re Lower Tha      | 1 | 90  | N | Fail        |
| 585825 | M | Tigrai Regi Lower Tha    | 1 | 60  | N | Withdrawn   |
| 585958 | M | South Wes Lower Tha      | 0 | 90  | Y | Pass        |
| 586282 | F | Somalia Re Lower Tha     | 0 | 240 | N | Withdrawn   |
| 586811 | M | South Regi A Level or I  | 1 | 60  | N | Fail        |
| 586906 | M | Afar Regi HE Qualific    | 2 | 60  | Y | Pass        |
| 587509 | M | Somalia Re A Level or I  | 0 | 150 | N | Fail        |
| 587571 | M | Sidamo Re A Level or I   | 0 | 60  | N | Distinction |
| 587654 | M | South Regi A Level or I  | 0 | 60  | N | Withdrawn   |
| 587706 | M | Afar Regi HE Qualific    | 0 | 60  | N | Fail        |
| 588128 | M | Addis Abak A Level or I  | 1 | 90  | N | Pass        |
| 588628 | M | South Wes A Level or I   | 0 | 60  | N | Pass        |
| 589080 | M | North Regi HE Qualific   | 0 | 60  | N | Distinction |
| 589162 | M | Sidamo Re A Level or I   | 0 | 60  | N | Pass        |
| 589332 | F | Afar Regi A Level or I   | 0 | 90  | N | Pass        |
| 589389 | M | South Wes Lower Tha      | 0 | 90  | N | Pass        |
| 589441 | M | South Regi Lower Tha     | 1 | 90  | N | Withdrawn   |
| 589798 | M | Addis Abak Lower Tha     | 1 | 210 | N | Withdrawn   |
| 589828 | M | Addis Abak Lower Tha     | 1 | 60  | Y | Pass        |
| 590120 | F | Afar Regi HE Qualific    | 0 | 60  | N | Pass        |
| 590381 | M | Addis Abak Lower Tha     | 0 | 120 | N | Withdrawn   |
| 590462 | M | Amhara Re A Level or I   | 1 | 120 | N | Withdrawn   |
| 590543 | M | South Regi Lower Tha     | 1 | 60  | N | Fail        |
| 590818 | M | South Regi A Level or I  | 0 | 60  | N | Fail        |
| 591525 | M | Oromia Re A Level or I   | 0 | 120 | N | Pass        |
| 591581 | M | Oromia Re Lower Tha      | 1 | 150 | N | Pass        |
| 591655 | M | North Regi Lower Tha     | 1 | 90  | N | Fail        |
| 591746 | M | Tigrai Regi HE Qualific  | 0 | 120 | N | Withdrawn   |
| 591946 | M | Tigrai Regi A Level or I | 1 | 90  | N | Pass        |
| 592218 | F | South Wes A Level or I   | 0 | 60  | N | Pass        |
| 592233 | M | Sidamo Re Lower Tha      | 0 | 60  | N | Withdrawn   |
| 592295 | M | South Regi Lower Tha     | 0 | 60  | Y | Pass        |
| 592558 | M | Amhara Re Lower Tha      | 0 | 60  | N | Pass        |
| 592657 | F | Sidamo Re Lower Tha      | 0 | 120 | Y | Withdrawn   |
| 592939 | M | Afar Regi HE Qualific    | 2 | 90  | N | Pass        |
| 593136 | F | South Regi A Level or I  | 0 | 60  | N | Pass        |
| 593563 | M | South Regi Lower Tha     | 1 | 90  | N | Pass        |
| 593722 | M | Sidamo Re Lower Tha      | 0 | 60  | N | Fail        |
| 593796 | F | Addis Abak Lower Tha     | 0 | 60  | Y | Distinction |
| 594065 | M | Oromia Re A Level or I   | 0 | 60  | N | Distinction |
| 594122 | M | North Regi A Level or I  | 1 | 120 | N | Pass        |
| 594229 | M | South Wes Lower Tha      | 0 | 60  | N | Pass        |
| 594258 | M | Amhara Re Lower Tha      | 1 | 90  | Y | Fail        |
| 594406 | M | Amhara Re HE Qualific    | 1 | 180 | N | Fail        |

|        |   |                          |   |     |   |           |
|--------|---|--------------------------|---|-----|---|-----------|
| 594615 | M | Tigray Region Lower Th   | 1 | 60  | N | Fail      |
| 594636 | M | South Region Lower Th    | 1 | 120 | Y | Pass      |
| 595246 | M | Amhara Region Lower Th   | 1 | 60  | N | Withdrawn |
| 595262 | M | South Region Lower Th    | 0 | 90  | N | Withdrawn |
| 595673 | M | South Region A Level or  | 0 | 120 | N | Withdrawn |
| 595676 | M | Sidamo Region Lower Th   | 1 | 60  | N | Fail      |
| 595721 | M | Sidamo Region Lower Th   | 0 | 120 | N | Pass      |
| 595943 | M | South Region A Level or  | 0 | 60  | N | Pass      |
| 596052 | M | Oromia Region Lower Th   | 0 | 120 | Y | Withdrawn |
| 596203 | F | North Region Lower Th    | 0 | 90  | N | Withdrawn |
| 596243 | M | Addis Ababa Lower Th     | 1 | 60  | Y | Pass      |
| 596245 | M | Oromia Region A Level or | 0 | 120 | N | Withdrawn |
| 596253 | M | Addis Ababa Lower Th     | 0 | 60  | N | Pass      |
| 596464 | M | Afar Region Lower Th     | 0 | 90  | N | Withdrawn |
| 596693 | M | South Region Lower Th    | 1 | 120 | N | Withdrawn |
| 596758 | M | Somalia Region Lower Th  | 0 | 60  | N | Pass      |
| 596805 | M | Afar Region HE Qualific  | 2 | 60  | N | Withdrawn |
| 597391 | M | Oromia Region A Level or | 0 | 120 | N | Withdrawn |
| 597740 | M | South West Lower Th      | 0 | 60  | N | Pass      |
| 597937 | M | South Region Lower Th    | 0 | 60  | N | Fail      |
| 598308 | M | South West Post Gradu    | 1 | 90  | N | Pass      |
| 598442 | M | Amhara Region A Level or | 0 | 120 | N | Withdrawn |
| 598540 | M | Amhara Region Lower Th   | 0 | 90  | N | Pass      |
| 598559 | M | Sidamo Region A Level or | 0 | 60  | Y | Pass      |
| 598582 | M | Afar Region A Level or   | 0 | 60  | N | Withdrawn |
| 598757 | M | South Region A Level or  | 1 | 90  | N | Fail      |
| 598939 | M | Sidamo Region Lower Th   | 0 | 120 | N | Withdrawn |
| 599007 | M | Oromia Region A Level or | 0 | 90  | N | Withdrawn |
| 599297 | M | Sidamo Region A Level or | 1 | 120 | N | Fail      |
| 599865 | M | Oromia Region A Level or | 0 | 60  | N | Fail      |
| 600071 | M | North Region Post Gradu  | 0 | 60  | N | Pass      |
| 600405 | M | Tigray Region Lower Th   | 1 | 120 | N | Fail      |
| 600615 | M | South West Lower Th      | 1 | 60  | N | Withdrawn |
| 600773 | M | Sidamo Region Lower Th   | 0 | 60  | N | Withdrawn |
| 600893 | F | Sidamo Region Lower Th   | 1 | 180 | N | Fail      |
| 601008 | M | Tigray Region Lower Th   | 1 | 180 | N | Pass      |
| 601180 | M | Afar Region HE Qualific  | 1 | 60  | N | Fail      |
| 601235 | M | Addis Ababa Lower Th     | 0 | 120 | N | Pass      |
| 601271 | M | South West Lower Th      | 1 | 60  | Y | Fail      |
| 601680 | M | Sidamo Region A Level or | 0 | 60  | N | Withdrawn |
| 601820 | M | North Region HE Qualific | 0 | 120 | N | Pass      |
| 602502 | M | Afar Region A Level or   | 1 | 120 | Y | Fail      |
| 602594 | M | South Region Lower Th    | 0 | 60  | N | Pass      |
| 603423 | M | North Region A Level or  | 1 | 60  | N | Fail      |
| 603648 | M | Afar Region HE Qualific  | 0 | 60  | N | Pass      |
| 603931 | M | North Region Lower Th    | 1 | 60  | N | Withdrawn |
| 604142 | M | South Region Lower Th    | 1 | 120 | N | Withdrawn |

|        |   |                          |   |     |   |             |
|--------|---|--------------------------|---|-----|---|-------------|
| 604567 | M | Afar Region HE Qualific  | 0 | 60  | N | Pass        |
| 604614 | M | Sidamo Re A Level or l   | 1 | 120 | N | Pass        |
| 604652 | F | Somalia Re Lower Than    | 0 | 300 | N | Withdrawn   |
| 604907 | M | Amhara Re Lower Than     | 0 | 60  | N | Fail        |
| 605091 | M | Oromia Re No Formal      | 1 | 60  | N | Fail        |
| 605180 | M | North Regi A Level or l  | 0 | 60  | N | Pass        |
| 605228 | F | Sidamo Re Lower Than     | 2 | 120 | N | Fail        |
| 605394 | M | Amhara Re A Level or l   | 1 | 90  | N | Fail        |
| 605682 | M | North Regi A Level or l  | 0 | 60  | N | Pass        |
| 606257 | F | North Regi HE Qualific   | 0 | 120 | N | Pass        |
| 606293 | F | Afar Region HE Qualific  | 0 | 120 | N | Withdrawn   |
| 606428 | M | North Regi A Level or l  | 1 | 60  | N | Withdrawn   |
| 606805 | M | Sidamo Re A Level or l   | 1 | 90  | N | Withdrawn   |
| 606904 | F | South Regi A Level or l  | 1 | 90  | N | Fail        |
| 607243 | M | Sidamo Re Lower Than     | 0 | 60  | Y | Pass        |
| 607303 | F | South Regi Lower Than    | 0 | 60  | N | Pass        |
| 607501 | M | Sidamo Re A Level or l   | 0 | 60  | N | Pass        |
| 607533 | F | South Wes Lower Than     | 1 | 90  | N | Withdrawn   |
| 607679 | M | Tigrai Regi A Level or l | 0 | 90  | N | Pass        |
| 607700 | M | South Wes A Level or l   | 0 | 90  | N | Pass        |
| 607733 | F | Sidamo Re A Level or l   | 0 | 90  | N | Withdrawn   |
| 607866 | M | South Regi Lower Than    | 1 | 60  | Y | Pass        |
| 608248 | M | Sidamo Re A Level or l   | 1 | 90  | N | Fail        |
| 609142 | F | Addis Abat A Level or l  | 0 | 60  | N | Distinction |
| 609240 | M | South Regi HE Qualific   | 0 | 60  | N | Pass        |
| 611465 | M | Sidamo Re Lower Than     | 1 | 120 | N | Withdrawn   |
| 611603 | M | South Regi A Level or l  | 0 | 60  | N | Pass        |
| 612763 | M | Sidamo Re Lower Than     | 0 | 60  | N | Withdrawn   |
| 612842 | F | Somalia Re A Level or l  | 0 | 60  | N | Pass        |
| 613165 | F | Sidamo Re A Level or l   | 0 | 120 | N | Pass        |
| 613330 | F | Sidamo Re Lower Than     | 0 | 60  | N | Pass        |
| 613634 | M | South Regi Lower Than    | 0 | 60  | Y | Pass        |
| 613899 | M | North Regi Lower Than    | 0 | 120 | N | Distinction |
| 613966 | M | Afar Region A Level or l | 0 | 60  | N | Fail        |
| 614059 | M | South Regi HE Qualific   | 1 | 60  | Y | Pass        |
| 614984 | M | South Wes Lower Than     | 1 | 60  | N | Pass        |
| 615266 | F | South Regi A Level or l  | 0 | 120 | N | Distinction |
| 615299 | F | Tigrai Regi A Level or l | 0 | 60  | N | Distinction |
| 615301 | F | Tigrai Regi A Level or l | 0 | 60  | N | Pass        |
| 615302 | M | Tigrai Regi A Level or l | 0 | 60  | N | Pass        |
| 615306 | M | Tigrai Regi Lower Than   | 0 | 60  | N | Pass        |
| 615328 | F | Tigrai Regi A Level or l | 0 | 60  | N | Withdrawn   |
| 615340 | F | Tigrai Regi A Level or l | 0 | 60  | N | Pass        |
| 615342 | F | Tigrai Regi A Level or l | 0 | 60  | N | Pass        |
| 615356 | F | Tigrai Regi A Level or l | 0 | 60  | N | Pass        |
| 616517 | M | Sidamo Re A Level or l   | 1 | 120 | N | Distinction |
| 616912 | M | Amhara Re Lower Than     | 0 | 60  | N | Distinction |

|        |   |                          |   |     |   |             |
|--------|---|--------------------------|---|-----|---|-------------|
| 617010 | F | Amhara Re A Level or I   | 1 | 60  | N | Pass        |
| 617119 | F | Tigrai Regi A Level or I | 0 | 60  | N | Pass        |
| 617130 | M | South Wes A Level or I   | 1 | 120 | N | Withdrawn   |
| 617150 | M | Oromia Re Lower Tha      | 0 | 90  | N | Withdrawn   |
| 617332 | M | Tigrai Regi A Level or I | 1 | 120 | N | Fail        |
| 617436 | M | Addis Abak Lower Tha     | 0 | 90  | N | Withdrawn   |
| 617580 | F | South Regi Lower Tha     | 0 | 60  | Y | Pass        |
| 617783 | M | Somalia Re HE Qualific   | 0 | 60  | N | Fail        |
| 617922 | M | Afar Regio A Level or I  | 0 | 60  | N | Pass        |
| 618252 | M | Sidamo Re A Level or I   | 0 | 90  | N | Withdrawn   |
| 618663 | F | South Regi A Level or I  | 0 | 60  | N | Pass        |
| 619204 | F | South Regi Lower Tha     | 1 | 90  | N | Pass        |
| 619292 | M | North Regi A Level or I  | 0 | 60  | N | Distinction |
| 619321 | M | South Regi Lower Tha     | 0 | 60  | N | Pass        |
| 619502 | M | Afar Regio HE Qualific   | 1 | 60  | N | Pass        |
| 619863 | F | Oromia Re HE Qualific    | 0 | 120 | N | Withdrawn   |
| 619887 | M | Somalia Re Lower Tha     | 1 | 120 | N | Withdrawn   |
| 620094 | F | Sidamo Re HE Qualific    | 0 | 90  | N | Distinction |
| 620112 | M | Oromia Re Lower Tha      | 1 | 60  | N | Withdrawn   |
| 620269 | M | Somalia Re A Level or I  | 0 | 60  | Y | Pass        |
| 620349 | M | Oromia Re A Level or I   | 0 | 60  | N | Withdrawn   |
| 620431 | M | South Regi A Level or I  | 1 | 60  | N | Pass        |
| 620740 | M | Oromia Re A Level or I   | 0 | 60  | N | Pass        |
| 620750 | F | Oromia Re Lower Tha      | 1 | 60  | N | Withdrawn   |
| 620810 | M | Sidamo Re A Level or I   | 0 | 60  | N | Pass        |
| 620824 | M | Sidamo Re A Level or I   | 1 | 90  | N | Fail        |
| 621307 | M | Sidamo Re No Formal      | 1 | 120 | N | Withdrawn   |
| 622029 | M | South Regi Lower Tha     | 0 | 120 | N | Withdrawn   |
| 622275 | M | Oromia Re Lower Tha      | 0 | 60  | N | Withdrawn   |
| 622362 | M | Amhara Re Lower Tha      | 0 | 60  | N | Withdrawn   |
| 622481 | M | Amhara Re Lower Tha      | 0 | 60  | N | Distinction |
| 622760 | M | Sidamo Re A Level or I   | 0 | 60  | N | Distinction |
| 622899 | M | Sidamo Re Post Gradu     | 1 | 90  | N | Withdrawn   |
| 622910 | M | South Wes Lower Tha      | 0 | 60  | N | Withdrawn   |
| 622934 | M | Tigrai Regi Lower Tha    | 0 | 60  | N | Pass        |
| 622967 | M | Afar Regio Lower Tha     | 0 | 90  | N | Fail        |
| 623166 | M | Amhara Re A Level or I   | 0 | 120 | Y | Withdrawn   |
| 623230 | M | Afar Regio A Level or I  | 0 | 60  | N | Withdrawn   |
| 623471 | M | South Wes Lower Tha      | 0 | 60  | N | Pass        |
| 623589 | F | Sidamo Re A Level or I   | 0 | 60  | N | Distinction |
| 623763 | M | Oromia Re Lower Tha      | 0 | 60  | N | Withdrawn   |
| 623765 | F | Amhara Re A Level or I   | 0 | 60  | N | Pass        |
| 623917 | M | South Regi Lower Tha     | 1 | 90  | N | Withdrawn   |
| 623945 | M | South Regi HE Qualific   | 1 | 60  | N | Withdrawn   |
| 623955 | M | South Regi A Level or I  | 0 | 120 | N | Fail        |
| 624282 | M | Sidamo Re HE Qualific    | 0 | 60  | N | Distinction |
| 624740 | M | South Regi Lower Tha     | 0 | 90  | N | Withdrawn   |

|        |   |                            |   |     |   |             |
|--------|---|----------------------------|---|-----|---|-------------|
| 624864 | M | South Wes A Level or I     | 0 | 120 | N | Distinction |
| 624970 | F | Afar Region HE Qualific    | 1 | 60  | N | Pass        |
| 625245 | M | Oromia Re A Level or I     | 0 | 60  | N | Pass        |
| 625330 | M | Afar Region A Level or I   | 0 | 60  | N | Withdrawn   |
| 625515 | M | Oromia Re Lower Than       | 0 | 60  | N | Pass        |
| 625609 | M | Amhara Re Lower Than       | 1 | 60  | N | Fail        |
| 625743 | M | South Regi A Level or I    | 0 | 90  | N | Pass        |
| 625802 | M | South Wes Lower Than       | 0 | 120 | N | Fail        |
| 625838 | M | Addis Abak A Level or I    | 0 | 60  | N | Pass        |
| 626033 | M | South Wes A Level or I     | 0 | 150 | N | Distinction |
| 626349 | M | Afar Region A Level or I   | 1 | 60  | N | Fail        |
| 626416 | F | South Regi A Level or I    | 0 | 60  | Y | Distinction |
| 626454 | F | Sidamo Re A Level or I     | 0 | 60  | N | Pass        |
| 626477 | F | Somalia Re Lower Than      | 0 | 180 | N | Pass        |
| 626514 | M | Addis Abak HE Qualific     | 0 | 60  | N | Pass        |
| 626539 | M | South Regi Lower Than      | 1 | 60  | N | Withdrawn   |
| 626552 | F | Somalia Re A Level or I    | 0 | 300 | N | Pass        |
| 626579 | F | South Regi A Level or I    | 0 | 120 | N | Fail        |
| 627238 | M | Afar Region Lower Than     | 1 | 90  | N | Withdrawn   |
| 627365 | F | Oromia Re Lower Than       | 0 | 60  | N | Distinction |
| 627379 | M | Sidamo Re Lower Than       | 1 | 90  | N | Withdrawn   |
| 627443 | M | Sidamo Re Lower Than       | 0 | 120 | N | Withdrawn   |
| 627829 | M | Sidamo Re Lower Than       | 1 | 150 | N | Pass        |
| 627840 | M | Amhara Re A Level or I     | 1 | 60  | N | Withdrawn   |
| 628054 | M | Somalia Re Lower Than      | 0 | 150 | N | Withdrawn   |
| 628149 | M | South Wes Lower Than       | 0 | 90  | N | Pass        |
| 628157 | F | Amhara Re A Level or I     | 0 | 90  | N | Pass        |
| 628308 | M | South Wes Lower Than       | 0 | 60  | Y | Withdrawn   |
| 628363 | M | Oromia Re Lower Than       | 0 | 60  | N | Fail        |
| 628383 | M | Sidamo Re HE Qualific      | 0 | 90  | N | Pass        |
| 628521 | M | South Regi Lower Than      | 0 | 120 | N | Pass        |
| 628888 | M | Somalia Re Lower Than      | 0 | 60  | N | Pass        |
| 628964 | M | Sidamo Re A Level or I     | 0 | 60  | N | Distinction |
| 629029 | M | South Regi Lower Than      | 0 | 60  | N | Fail        |
| 629182 | M | Addis Abak A Level or I    | 1 | 60  | N | Fail        |
| 629394 | M | Afar Region A Level or I   | 1 | 60  | N | Withdrawn   |
| 629491 | M | Sidamo Re Lower Than       | 0 | 90  | N | Pass        |
| 629522 | M | South Regi Lower Than      | 1 | 60  | N | Withdrawn   |
| 629594 | M | Somalia Re Lower Than      | 0 | 60  | N | Fail        |
| 629686 | M | Tigrai Region Lower Than   | 0 | 120 | N | Withdrawn   |
| 629818 | M | Tigrai Region A Level or I | 1 | 90  | N | Distinction |
| 629907 | F | Amhara Re Lower Than       | 0 | 120 | N | Withdrawn   |
| 629922 | F | Sidamo Re HE Qualific      | 0 | 60  | N | Pass        |
| 629944 | M | Amhara Re A Level or I     | 0 | 60  | N | Distinction |
| 630024 | M | South Regi A Level or I    | 0 | 120 | N | Withdrawn   |
| 630109 | M | Sidamo Re A Level or I     | 1 | 60  | N | Pass        |
| 630158 | M | Amhara Re Lower Than       | 0 | 60  | N | Pass        |

|        |   |                          |   |     |   |             |
|--------|---|--------------------------|---|-----|---|-------------|
| 630168 | M | Oromia Re A Level or l   | 1 | 60  | Y | Withdrawn   |
| 630186 | M | Somalia Re A Level or l  | 0 | 120 | N | Withdrawn   |
| 630289 | F | Afar Region HE Qualific  | 0 | 150 | Y | Withdrawn   |
| 630358 | M | Amhara Re Lower Than     | 0 | 60  | N | Withdrawn   |
| 630510 | M | Oromia Re A Level or l   | 0 | 240 | N | Withdrawn   |
| 630745 | M | Sidamo Re Lower Than     | 0 | 120 | N | Withdrawn   |
| 630835 | F | South Regi A Level or l  | 0 | 60  | N | Distinction |
| 630905 | M | Tigrai Regi HE Qualific  | 0 | 120 | N | Distinction |
| 630910 | M | South Wes A Level or l   | 0 | 60  | N | Pass        |
| 630992 | F | Somalia Re A Level or l  | 1 | 60  | N | Fail        |
| 631075 | M | Afar Region A Level or l | 1 | 90  | N | Fail        |
| 631193 | M | Somalia Re Lower Than    | 0 | 120 | Y | Withdrawn   |
| 631438 | M | Amhara Re Lower Than     | 0 | 60  | N | Fail        |
| 631524 | M | South Wes A Level or l   | 1 | 60  | Y | Fail        |
| 631658 | M | Addis Abak Lower Than    | 0 | 60  | N | Distinction |
| 631681 | F | North Regi Lower Than    | 0 | 90  | N | Pass        |
| 631715 | M | South Regi HE Qualific   | 0 | 90  | N | Distinction |
| 631740 | F | Tigrai Regi Lower Than   | 0 | 60  | Y | Pass        |
| 631750 | M | Oromia Re Lower Than     | 0 | 120 | N | Withdrawn   |
| 631772 | M | Afar Region Lower Than   | 0 | 120 | N | Withdrawn   |
| 631837 | M | Afar Region HE Qualific  | 0 | 90  | N | Distinction |
| 631924 | F | Amhara Re A Level or l   | 0 | 120 | N | Distinction |
| 632074 | M | Afar Region A Level or l | 0 | 60  | N | Distinction |
| 632179 | F | Somalia Re Lower Than    | 1 | 90  | N | Withdrawn   |
| 632276 | F | South Regi A Level or l  | 0 | 120 | N | Withdrawn   |
| 632290 | M | North Regi A Level or l  | 1 | 60  | N | Pass        |
| 632458 | M | North Regi Lower Than    | 0 | 60  | N | Distinction |
| 632556 | M | South Regi A Level or l  | 0 | 60  | N | Fail        |
| 632597 | M | Tigrai Regi A Level or l | 0 | 60  | N | Pass        |
| 632634 | M | Somalia Re A Level or l  | 1 | 60  | Y | Withdrawn   |
| 632773 | M | South Regi HE Qualific   | 1 | 60  | N | Withdrawn   |
| 632826 | M | Addis Abak A Level or l  | 0 | 120 | N | Pass        |
| 632836 | F | Sidamo Re Lower Than     | 0 | 60  | N | Pass        |
| 633079 | F | Afar Region Post Gradu   | 0 | 60  | N | Pass        |
| 633516 | M | South Wes A Level or l   | 0 | 60  | N | Pass        |
| 633555 | M | Sidamo Re A Level or l   | 0 | 60  | N | Distinction |
| 633568 | M | Amhara Re Lower Than     | 0 | 60  | N | Pass        |
| 633628 | M | South Wes A Level or l   | 1 | 60  | N | Fail        |
| 633867 | M | Afar Region Lower Than   | 0 | 90  | N | Pass        |
| 633931 | M | Somalia Re A Level or l  | 0 | 90  | N | Distinction |
| 634088 | M | North Regi A Level or l  | 1 | 90  | N | Distinction |
| 634114 | M | Afar Region Lower Than   | 1 | 60  | Y | Fail        |
| 634512 | M | Amhara Re Lower Than     | 0 | 60  | N | Pass        |
| 634526 | M | North Regi A Level or l  | 1 | 90  | N | Pass        |
| 634601 | F | South Regi A Level or l  | 0 | 90  | N | Fail        |
| 634749 | M | Oromia Re Lower Than     | 0 | 90  | N | Pass        |
| 634888 | M | Amhara Re Lower Than     | 0 | 60  | Y | Fail        |



|        |   |                          |   |     |   |             |
|--------|---|--------------------------|---|-----|---|-------------|
| 634943 | M | South Regi HE Qualific   | 0 | 120 | N | Withdrawn   |
| 635079 | M | Afar Regio A Level or I  | 1 | 60  | N | Fail        |
| 635165 | M | Oromia Re A Level or I   | 0 | 120 | Y | Withdrawn   |
| 635184 | M | South Wes Lower Thar     | 0 | 60  | N | Fail        |
| 635191 | M | South Regi Lower Thar    | 0 | 120 | N | Withdrawn   |
| 635271 | F | Sidamo Re A Level or I   | 0 | 60  | N | Withdrawn   |
| 635410 | M | South Regi A Level or I  | 0 | 150 | Y | Fail        |
| 635746 | M | Sidamo Re A Level or I   | 0 | 90  | Y | Withdrawn   |
| 635751 | M | Sidamo Re Lower Thar     | 0 | 60  | N | Fail        |
| 635795 | M | Afar Regio A Level or I  | 0 | 60  | N | Pass        |
| 635903 | M | Sidamo Re Lower Thar     | 0 | 60  | N | Fail        |
| 635985 | M | Amhara Re A Level or I   | 0 | 120 | N | Fail        |
| 636314 | M | Afar Regio HE Qualific   | 0 | 60  | N | Pass        |
| 636375 | M | South Wes Lower Thar     | 0 | 60  | N | Withdrawn   |
| 636400 | F | South Regi A Level or I  | 0 | 60  | N | Pass        |
| 636407 | M | Afar Regio HE Qualific   | 0 | 120 | N | Fail        |
| 636408 | F | Tigrai Regi A Level or I | 0 | 60  | N | Pass        |
| 636469 | M | Afar Regio A Level or I  | 0 | 60  | N | Distinction |
| 636492 | F | Sidamo Re A Level or I   | 0 | 120 | N | Withdrawn   |
| 636547 | M | South Regi HE Qualific   | 0 | 120 | N | Fail        |
| 636565 | M | Somalia Re Lower Thar    | 0 | 90  | N | Pass        |
| 636634 | F | Somalia Re Lower Thar    | 0 | 120 | Y | Withdrawn   |
| 636653 | M | South Regi Lower Thar    | 0 | 120 | N | Fail        |
| 636656 | M | Addis Abat A Level or I  | 0 | 120 | N | Pass        |
| 636704 | F | South Regi A Level or I  | 0 | 120 | N | Fail        |
| 636749 | F | Sidamo Re Lower Thar     | 0 | 240 | Y | Withdrawn   |
| 636783 | M | North Regi HE Qualific   | 0 | 150 | N | Distinction |
| 636830 | M | Afar Regio HE Qualific   | 0 | 60  | N | Distinction |
| 636832 | M | Tigrai Regi A Level or I | 0 | 120 | N | Pass        |
| 637004 | F | North Regi Lower Thar    | 0 | 60  | N | Pass        |
| 637089 | M | Tigrai Regi A Level or I | 0 | 180 | N | Fail        |
| 637338 | M | Addis Abat Lower Thar    | 0 | 120 | N | Withdrawn   |
| 637358 | M | Tigrai Regi Lower Thar   | 0 | 120 | N | Pass        |
| 637474 | F | Sidamo Re A Level or I   | 0 | 120 | N | Withdrawn   |
| 637509 | F | South Wes Lower Thar     | 0 | 150 | N | Fail        |
| 637514 | M | Sidamo Re A Level or I   | 0 | 60  | N | Withdrawn   |
| 637563 | M | Somalia Re A Level or I  | 0 | 120 | N | Fail        |
| 637582 | M | Addis Abat HE Qualific   | 0 | 90  | N | Fail        |
| 637708 | M | Addis Abat HE Qualific   | 0 | 120 | N | Distinction |
| 637788 | M | Somalia Re Lower Thar    | 0 | 60  | Y | Fail        |
| 637800 | M | Sidamo Re Lower Thar     | 0 | 120 | Y | Withdrawn   |
| 637906 | M | Tigrai Regi Lower Thar   | 0 | 90  | N | Pass        |
| 637939 | M | South Wes A Level or I   | 0 | 150 | N | Fail        |
| 637980 | F | Afar Regio HE Qualific   | 0 | 60  | N | Pass        |
| 638034 | M | Afar Regio A Level or I  | 0 | 120 | N | Pass        |
| 638388 | M | Addis Abat A Level or I  | 0 | 60  | N | Pass        |
| 638411 | M | South Regi A Level or I  | 0 | 60  | N | Pass        |

|        |   |                           |   |     |   |             |
|--------|---|---------------------------|---|-----|---|-------------|
| 638414 | M | South Regi Lower Tha      | 0 | 120 | N | Withdrawn   |
| 638425 | M | Oromia Re A Level or I    | 0 | 60  | N | Withdrawn   |
| 638498 | M | South Regi Lower Tha      | 0 | 90  | N | Pass        |
| 638515 | M | South Regi Lower Tha      | 0 | 90  | N | Pass        |
| 638625 | M | South Regi A Level or I   | 0 | 60  | N | Pass        |
| 638655 | M | Oromia Re A Level or I    | 0 | 90  | N | Pass        |
| 638677 | F | Addis Abak A Level or I   | 0 | 120 | N | Withdrawn   |
| 638831 | M | Sidamo Re Lower Tha       | 0 | 90  | N | Fail        |
| 639028 | F | Sidamo Re Lower Tha       | 0 | 90  | N | Pass        |
| 639231 | M | Sidamo Re Lower Tha       | 0 | 120 | N | Pass        |
| 639234 | M | Afar Regioi A Level or I  | 0 | 120 | Y | Withdrawn   |
| 639238 | M | Amhara Re Lower Tha       | 0 | 120 | N | Withdrawn   |
| 639522 | M | Oromia Re A Level or I    | 0 | 90  | N | Pass        |
| 639919 | M | Addis Abak Lower Tha      | 0 | 60  | N | Withdrawn   |
| 639993 | M | Addis Abak A Level or I   | 0 | 60  | Y | Withdrawn   |
| 640098 | F | Afar Regioi A Level or I  | 0 | 60  | N | Pass        |
| 640140 | M | Sidamo Re Lower Tha       | 0 | 240 | N | Withdrawn   |
| 640278 | M | Afar Regioi HE Qualific   | 0 | 60  | N | Pass        |
| 640329 | F | Sidamo Re A Level or I    | 0 | 180 | N | Pass        |
| 640393 | M | Afar Regioi A Level or I  | 0 | 120 | N | Withdrawn   |
| 640429 | M | Amhara Re A Level or I    | 0 | 90  | N | Distinction |
| 640552 | M | Amhara Re Lower Tha       | 0 | 120 | Y | Withdrawn   |
| 640584 | M | Somalia Re Lower Tha      | 0 | 120 | N | Withdrawn   |
| 640711 | F | Tigrai Regio Lower Tha    | 0 | 90  | Y | Pass        |
| 640752 | M | Amhara Re HE Qualific     | 0 | 60  | N | Pass        |
| 640774 | M | Sidamo Re Lower Tha       | 0 | 120 | N | Withdrawn   |
| 640848 | F | South Regi Lower Tha      | 0 | 90  | N | Pass        |
| 640892 | M | Amhara Re A Level or I    | 0 | 60  | Y | Pass        |
| 640913 | M | South Regi Lower Tha      | 0 | 90  | N | Pass        |
| 640927 | M | South Regi HE Qualific    | 0 | 60  | N | Pass        |
| 641028 | M | Amhara Re Lower Tha       | 0 | 60  | N | Fail        |
| 641085 | M | Amhara Re A Level or I    | 0 | 90  | N | Fail        |
| 641137 | M | Addis Abak Lower Tha      | 0 | 60  | N | Distinction |
| 641169 | M | Addis Abak Lower Tha      | 0 | 90  | N | Withdrawn   |
| 641265 | M | Tigrai Regio A Level or I | 0 | 240 | N | Withdrawn   |
| 641275 | M | North Regi Lower Tha      | 0 | 60  | N | Withdrawn   |
| 641307 | M | Amhara Re A Level or I    | 0 | 120 | N | Withdrawn   |
| 641309 | M | South Regi A Level or I   | 0 | 60  | N | Pass        |
| 641311 | M | Oromia Re Lower Tha       | 0 | 60  | N | Distinction |
| 641363 | M | North Regi A Level or I   | 0 | 120 | N | Pass        |
| 641401 | M | Amhara Re A Level or I    | 0 | 60  | N | Distinction |
| 641404 | M | South Regi Lower Tha      | 0 | 120 | N | Withdrawn   |
| 641433 | M | Oromia Re Lower Tha       | 0 | 60  | N | Fail        |
| 641461 | M | Addis Abak Lower Tha      | 0 | 60  | N | Pass        |
| 641470 | M | Amhara Re Lower Tha       | 0 | 60  | N | Fail        |
| 641547 | M | Oromia Re Lower Tha       | 0 | 90  | N | Pass        |
| 641565 | M | South Regi Lower Tha      | 0 | 180 | N | Withdrawn   |

|        |   |                          |   |     |   |             |
|--------|---|--------------------------|---|-----|---|-------------|
| 641804 | M | South Regi A Level or I  | 0 | 120 | N | Withdrawn   |
| 641864 | M | South Regi Lower Tha     | 0 | 60  | N | Distinction |
| 641866 | F | South Regi Lower Tha     | 0 | 60  | N | Withdrawn   |
| 641914 | M | Tigrai Regi A Level or I | 0 | 60  | N | Pass        |
| 642013 | F | Oromia Re A Level or I   | 0 | 240 | N | Withdrawn   |
| 642029 | M | Oromia Re A Level or I   | 0 | 60  | N | Pass        |
| 642056 | M | South Regi A Level or I  | 0 | 60  | N | Distinction |
| 642128 | M | Sidamo Re A Level or I   | 0 | 120 | N | Withdrawn   |
| 642375 | M | Amhara Re Lower Tha      | 0 | 60  | N | Pass        |
| 642448 | M | South Regi Lower Tha     | 0 | 120 | N | Pass        |
| 642449 | F | South Regi Lower Tha     | 0 | 90  | N | Pass        |
| 642493 | M | Tigrai Regi Lower Tha    | 0 | 60  | N | Pass        |
| 642496 | M | Somalia Re A Level or I  | 0 | 180 | N | Withdrawn   |
| 642498 | M | Sidamo Re A Level or I   | 0 | 60  | N | Pass        |
| 642536 | F | North Regi Lower Tha     | 0 | 60  | N | Fail        |
| 642551 | M | Sidamo Re A Level or I   | 0 | 60  | N | Pass        |
| 642560 | M | Somalia Re HE Qualific   | 0 | 60  | N | Withdrawn   |
| 642626 | F | Amhara Re Lower Tha      | 0 | 120 | Y | Withdrawn   |
| 642730 | M | Addis Abat Lower Tha     | 0 | 60  | N | Fail        |
| 642740 | M | South Regi A Level or I  | 0 | 60  | N | Distinction |
| 642750 | M | Sidamo Re HE Qualific    | 0 | 90  | N | Distinction |
| 642790 | M | Sidamo Re Lower Tha      | 0 | 150 | N | Withdrawn   |
| 642840 | M | South Regi Lower Tha     | 0 | 120 | Y | Fail        |
| 642843 | M | South Regi Lower Tha     | 0 | 120 | Y | Pass        |
| 642872 | M | Somalia Re Lower Tha     | 0 | 90  | N | Pass        |
| 642909 | M | Amhara Re A Level or I   | 0 | 120 | N | Pass        |
| 642939 | M | South Regi Lower Tha     | 0 | 60  | N | Withdrawn   |
| 643024 | M | North Regi A Level or I  | 0 | 60  | N | Withdrawn   |
| 643069 | M | Amhara Re A Level or I   | 0 | 90  | N | Pass        |
| 643202 | M | Somalia Re HE Qualific   | 0 | 60  | N | Distinction |
| 643220 | M | Somalia Re HE Qualific   | 0 | 60  | N | Distinction |
| 643273 | M | South Regi Lower Tha     | 0 | 60  | N | Pass        |
| 643326 | F | South Regi A Level or I  | 0 | 60  | N | Pass        |
| 643372 | F | Amhara Re A Level or I   | 0 | 60  | N | Fail        |
| 643379 | M | Somalia Re Lower Tha     | 0 | 60  | N | Withdrawn   |
| 643455 | M | South Regi Lower Tha     | 0 | 120 | Y | Withdrawn   |
| 643466 | M | North Regi HE Qualific   | 0 | 60  | N | Pass        |
| 643477 | M | Afar Regioi A Level or I | 0 | 60  | N | Pass        |
| 643496 | F | Oromia Re A Level or I   | 0 | 60  | Y | Pass        |
| 643502 | M | South Regi A Level or I  | 0 | 120 | N | Pass        |
| 643591 | M | South Wes A Level or I   | 0 | 60  | N | Distinction |
| 643653 | F | South Regi A Level or I  | 0 | 60  | Y | Pass        |
| 643690 | M | South Wes Lower Tha      | 0 | 180 | N | Withdrawn   |
| 643696 | M | South Wes Lower Tha      | 0 | 120 | N | Fail        |
| 643751 | M | Oromia Re HE Qualific    | 0 | 60  | N | Distinction |
| 643754 | F | Oromia Re HE Qualific    | 0 | 60  | N | Distinction |
| 643757 | M | South Regi HE Qualific   | 0 | 120 | N | Fail        |

|        |   |                          |   |     |   |             |
|--------|---|--------------------------|---|-----|---|-------------|
| 644025 | F | Somalia Re A Level or I  | 0 | 120 | N | Pass        |
| 644210 | M | South Wes Lower Thai     | 0 | 180 | Y | Pass        |
| 644303 | F | Somalia Re Lower Thai    | 0 | 60  | N | Withdrawn   |
| 644343 | M | South Wes Lower Thai     | 0 | 120 | N | Pass        |
| 644361 | F | Amhara Re Lower Thai     | 0 | 120 | N | Pass        |
| 644369 | M | Tigrai Regi Lower Thai   | 0 | 150 | N | Pass        |
| 644430 | F | Addis Abak Lower Thai    | 0 | 120 | N | Fail        |
| 644450 | M | Somalia Re Lower Thai    | 0 | 60  | N | Distinction |
| 644508 | F | South Regi Lower Thai    | 0 | 60  | N | Pass        |
| 644761 | M | Somalia Re A Level or I  | 0 | 60  | N | Pass        |
| 644784 | M | Somalia Re A Level or I  | 0 | 60  | N | Pass        |
| 644791 | M | Somalia Re Lower Thai    | 0 | 60  | N | Pass        |
| 644818 | M | Afar Regio Lower Thai    | 0 | 60  | N | Pass        |
| 644834 | M | Tigrai Regi HE Qualific  | 0 | 60  | N | Withdrawn   |
| 644847 | M | Amhara Re Lower Thai     | 0 | 150 | N | Pass        |
| 644871 | M | North Regi A Level or I  | 0 | 60  | N | Withdrawn   |
| 644885 | F | South Wes A Level or I   | 0 | 60  | N | Withdrawn   |
| 644934 | M | Somalia Re A Level or I  | 0 | 60  | N | Withdrawn   |
| 644936 | F | Oromia Re A Level or I   | 0 | 120 | N | Pass        |
| 644967 | F | Sidamo Re Lower Thai     | 0 | 60  | N | Fail        |
| 644974 | M | Sidamo Re A Level or I   | 0 | 120 | N | Distinction |
| 645003 | M | North Regi Lower Thai    | 0 | 60  | N | Fail        |
| 645020 | M | South Wes A Level or I   | 0 | 60  | N | Pass        |
| 645078 | M | Oromia Re A Level or I   | 0 | 60  | N | Distinction |
| 645145 | M | Oromia Re Lower Thai     | 0 | 120 | N | Fail        |
| 645194 | M | South Regi Lower Thai    | 0 | 180 | Y | Withdrawn   |
| 645366 | M | Amhara Re Lower Thai     | 0 | 60  | N | Withdrawn   |
| 645401 | M | Addis Abak Lower Thai    | 0 | 90  | N | Withdrawn   |
| 645405 | M | South Wes Lower Thai     | 0 | 120 | N | Pass        |
| 645407 | M | Somalia Re Lower Thai    | 0 | 60  | N | Withdrawn   |
| 645433 | M | Afar Regio A Level or I  | 0 | 60  | N | Withdrawn   |
| 645496 | M | South Wes Lower Thai     | 0 | 90  | Y | Fail        |
| 645518 | M | Afar Regio Lower Thai    | 0 | 60  | N | Fail        |
| 645529 | F | South Wes Lower Thai     | 0 | 120 | N | Withdrawn   |
| 645586 | M | Afar Regio HE Qualific   | 0 | 90  | N | Pass        |
| 645618 | F | Amhara Re HE Qualific    | 0 | 210 | N | Withdrawn   |
| 645638 | M | South Wes A Level or I   | 0 | 120 | N | Withdrawn   |
| 645705 | M | Tigrai Regi A Level or I | 0 | 120 | N | Pass        |
| 645732 | M | Somalia Re A Level or I  | 0 | 60  | N | Pass        |
| 645784 | F | Afar Regio Lower Thai    | 0 | 90  | N | Pass        |
| 645787 | F | Sidamo Re No Formal      | 0 | 210 | N | Withdrawn   |
| 645790 | M | South Regi A Level or I  | 0 | 120 | N | Fail        |
| 645800 | M | Tigrai Regi A Level or I | 0 | 120 | N | Withdrawn   |
| 645840 | M | South Wes Lower Thai     | 0 | 120 | N | Fail        |
| 645880 | M | Afar Regio A Level or I  | 0 | 60  | N | Fail        |
| 645948 | M | South Regi Lower Thai    | 0 | 90  | N | Pass        |
| 645960 | F | Tigrai Regi A Level or I | 0 | 120 | N | Pass        |

|        |   |                          |   |     |   |             |
|--------|---|--------------------------|---|-----|---|-------------|
| 645997 | M | Sidamo Re HE Qualific    | 0 | 90  | N | Pass        |
| 646015 | M | South Regi A Level or I  | 0 | 60  | N | Distinction |
| 646017 | M | South Wes A Level or I   | 0 | 90  | N | Pass        |
| 646053 | M | Addis Abak A Level or I  | 0 | 120 | Y | Pass        |
| 646074 | M | Sidamo Re Lower Than     | 0 | 90  | N | Pass        |
| 646083 | M | Tigrai Regi A Level or I | 0 | 60  | N | Withdrawn   |
| 646085 | F | Sidamo Re A Level or I   | 0 | 60  | N | Distinction |
| 646091 | M | North Regi A Level or I  | 0 | 120 | N | Withdrawn   |
| 646120 | M | Addis Abak Lower Than    | 0 | 90  | N | Withdrawn   |
| 646138 | M | Amhara Re Lower Than     | 0 | 90  | N | Pass        |
| 646313 | F | Afar Regioi A Level or I | 0 | 60  | N | Pass        |
| 646357 | M | Tigrai Regi Lower Than   | 0 | 60  | N | Distinction |
| 646402 | M | Afar Regioi Post Gradu   | 0 | 120 | N | Pass        |
| 646460 | M | Oromia Re Lower Than     | 0 | 60  | N | Pass        |
| 646498 | M | South Wes A Level or I   | 0 | 120 | Y | Withdrawn   |
| 646539 | F | Afar Regioi HE Qualific  | 0 | 90  | N | Pass        |
| 646540 | M | South Regi A Level or I  | 0 | 60  | N | Distinction |
| 646551 | M | Sidamo Re A Level or I   | 0 | 60  | N | Pass        |
| 646613 | M | Somalia Re A Level or I  | 0 | 60  | N | Withdrawn   |
| 646638 | M | Addis Abak A Level or I  | 0 | 120 | N | Pass        |
| 646670 | M | Oromia Re A Level or I   | 0 | 120 | N | Pass        |
| 646734 | M | Afar Regioi A Level or I | 0 | 90  | N | Withdrawn   |
| 646742 | M | Amhara Re A Level or I   | 0 | 210 | N | Withdrawn   |
| 646750 | M | North Regi A Level or I  | 0 | 120 | N | Pass        |
| 646778 | M | Sidamo Re A Level or I   | 0 | 60  | N | Distinction |
| 646807 | M | Somalia Re Lower Than    | 0 | 180 | N | Withdrawn   |
| 646972 | F | Sidamo Re HE Qualific    | 0 | 60  | N | Withdrawn   |
| 646990 | M | Somalia Re A Level or I  | 0 | 120 | N | Pass        |
| 647005 | M | South Regi Lower Than    | 0 | 60  | N | Withdrawn   |
| 647033 | M | Sidamo Re Lower Than     | 0 | 120 | Y | Withdrawn   |
| 647040 | M | Sidamo Re A Level or I   | 0 | 120 | N | Pass        |
| 647045 | F | Tigrai Regi Lower Than   | 0 | 90  | N | Fail        |
| 647072 | M | Sidamo Re A Level or I   | 0 | 60  | N | Withdrawn   |
| 647111 | M | Sidamo Re Lower Than     | 0 | 60  | N | Withdrawn   |
| 647154 | M | Sidamo Re A Level or I   | 0 | 60  | N | Pass        |
| 647169 | M | Sidamo Re A Level or I   | 0 | 120 | N | Distinction |
| 647171 | M | Sidamo Re Lower Than     | 0 | 120 | Y | Fail        |
| 647194 | M | Amhara Re HE Qualific    | 0 | 60  | N | Fail        |
| 647210 | M | Sidamo Re Lower Than     | 0 | 60  | N | Withdrawn   |
| 647245 | M | Sidamo Re No Formal      | 0 | 150 | N | Withdrawn   |
| 647284 | M | South Regi A Level or I  | 0 | 120 | N | Withdrawn   |
| 647320 | F | South Wes Lower Than     | 0 | 120 | N | Pass        |
| 647321 | M | Addis Abak A Level or I  | 0 | 60  | Y | Withdrawn   |
| 647324 | M | Somalia Re A Level or I  | 0 | 120 | Y | Distinction |
| 647339 | M | Somalia Re A Level or I  | 0 | 90  | N | Fail        |
| 647348 | F | Oromia Re A Level or I   | 0 | 60  | N | Withdrawn   |
| 647391 | F | Afar Regioi HE Qualific  | 0 | 150 | N | Pass        |

|        |   |                          |   |     |   |             |
|--------|---|--------------------------|---|-----|---|-------------|
| 647398 | M | South Regi A Level or I  | 0 | 90  | N | Pass        |
| 647399 | F | Somalia Re A Level or I  | 0 | 120 | Y | Pass        |
| 647417 | M | South Regi A Level or I  | 0 | 120 | Y | Withdrawn   |
| 647425 | F | Tigrai Regi Lower Than   | 0 | 120 | N | Pass        |
| 647485 | M | South Wes A Level or I   | 0 | 60  | Y | Pass        |
| 647496 | M | South Wes A Level or I   | 0 | 60  | N | Pass        |
| 647525 | M | South Wes Lower Than     | 0 | 60  | N | Withdrawn   |
| 647594 | F | Addis Abak Lower Than    | 0 | 90  | N | Withdrawn   |
| 647598 | M | South Wes A Level or I   | 0 | 60  | N | Fail        |
| 647765 | M | Oromia Re Lower Than     | 0 | 60  | N | Pass        |
| 647784 | F | North Regi HE Qualific   | 0 | 60  | N | Withdrawn   |
| 647799 | M | Somalia Re Lower Than    | 0 | 120 | N | Withdrawn   |
| 647841 | M | South Regi Lower Than    | 0 | 60  | N | Pass        |
| 647898 | M | Tigrai Regi A Level or I | 0 | 60  | N | Distinction |
| 647910 | F | Sidamo Re A Level or I   | 0 | 120 | N | Fail        |
| 647915 | M | Afar Regi A Level or I   | 0 | 180 | N | Withdrawn   |
| 647945 | M | Addis Abak Lower Than    | 0 | 120 | N | Pass        |
| 647987 | M | Somalia Re Lower Than    | 0 | 120 | Y | Fail        |
| 648027 | M | Amhara Re A Level or I   | 0 | 90  | N | Pass        |
| 648037 | M | South Regi A Level or I  | 0 | 60  | N | Distinction |
| 648038 | M | Amhara Re Lower Than     | 0 | 120 | N | Pass        |
| 648040 | M | Afar Regi Lower Than     | 0 | 60  | N | Pass        |
| 648086 | M | Addis Abak Lower Than    | 0 | 90  | N | Pass        |
| 648105 | M | Tigrai Regi Lower Than   | 0 | 60  | N | Pass        |
| 648114 | M | Afar Regi Lower Than     | 0 | 90  | N | Pass        |
| 648116 | F | North Regi Lower Than    | 0 | 120 | N | Pass        |
| 648118 | M | Afar Regi A Level or I   | 0 | 120 | N | Withdrawn   |
| 648137 | M | Addis Abak Lower Than    | 0 | 60  | N | Withdrawn   |
| 648140 | M | South Regi A Level or I  | 0 | 120 | N | Pass        |
| 648190 | M | North Regi Lower Than    | 0 | 120 | N | Fail        |
| 648244 | F | Tigrai Regi HE Qualific  | 0 | 120 | N | Fail        |
| 648254 | M | Somalia Re Lower Than    | 0 | 60  | N | Pass        |
| 648287 | M | Tigrai Regi A Level or I | 0 | 150 | N | Pass        |
| 648348 | M | Amhara Re HE Qualific    | 0 | 90  | N | Withdrawn   |
| 648353 | M | Amhara Re Lower Than     | 0 | 120 | N | Fail        |
| 648365 | M | South Wes HE Qualific    | 0 | 60  | N | Pass        |
| 648366 | M | Sidamo Re A Level or I   | 0 | 60  | N | Distinction |
| 648373 | M | Somalia Re A Level or I  | 0 | 90  | N | Withdrawn   |
| 648455 | M | Addis Abak A Level or I  | 0 | 120 | N | Fail        |
| 648457 | M | Oromia Re A Level or I   | 0 | 120 | N | Distinction |
| 648470 | F | Oromia Re A Level or I   | 0 | 90  | N | Distinction |
| 648477 | M | Sidamo Re Lower Than     | 0 | 120 | N | Withdrawn   |
| 648508 | M | Sidamo Re A Level or I   | 0 | 120 | Y | Fail        |
| 648515 | M | Afar Regi A Level or I   | 0 | 120 | N | Fail        |
| 648521 | F | Sidamo Re A Level or I   | 0 | 90  | N | Withdrawn   |
| 648531 | M | Sidamo Re Lower Than     | 0 | 150 | Y | Distinction |
| 648536 | M | Somalia Re A Level or I  | 0 | 120 | N | Distinction |

|        |   |                        |   |     |   |             |
|--------|---|------------------------|---|-----|---|-------------|
| 648546 | M | Sidamo Re Lower Than   | 0 | 120 | N | Withdrawn   |
| 648564 | M | South Regi A Level or  | 0 | 120 | N | Pass        |
| 648571 | M | Afar Regio A Level or  | 0 | 90  | N | Distinction |
| 648576 | M | Somalia Re Lower Than  | 0 | 60  | N | Withdrawn   |
| 648590 | M | Sidamo Re A Level or   | 0 | 120 | N | Pass        |
| 648605 | M | Somalia Re A Level or  | 0 | 120 | N | Withdrawn   |
| 648611 | M | Sidamo Re Lower Than   | 0 | 60  | N | Withdrawn   |
| 648613 | M | Addis Abat A Level or  | 0 | 60  | N | Pass        |
| 648650 | F | Amhara Re A Level or   | 0 | 180 | N | Withdrawn   |
| 648661 | M | South Wes Lower Than   | 0 | 60  | Y | Fail        |
| 648667 | M | South Wes A Level or   | 0 | 60  | N | Withdrawn   |
| 648685 | M | South Regi A Level or  | 0 | 60  | N | Distinction |
| 648698 | M | South Regi A Level or  | 0 | 60  | N | Withdrawn   |
| 648725 | M | South Wes A Level or   | 0 | 120 | N | Withdrawn   |
| 648804 | M | Oromia Re Lower Than   | 0 | 60  | N | Fail        |
| 648815 | M | Afar Regio Lower Than  | 0 | 120 | N | Pass        |
| 648819 | M | Somalia Re A Level or  | 0 | 120 | N | Withdrawn   |
| 648840 | M | South Wes Lower Than   | 0 | 60  | N | Withdrawn   |
| 648863 | M | Addis Abat Lower Than  | 0 | 60  | N | Withdrawn   |
| 648867 | M | Amhara Re Lower Than   | 0 | 60  | N | Fail        |
| 648872 | F | Tigrai Regi Lower Than | 0 | 120 | N | Withdrawn   |
| 648903 | M | Sidamo Re Lower Than   | 0 | 120 | N | Pass        |
| 648927 | M | North Regi A Level or  | 0 | 150 | Y | Withdrawn   |
| 648930 | M | North Regi Lower Than  | 0 | 60  | N | Fail        |
| 648972 | M | Addis Abat Lower Than  | 0 | 60  | N | Pass        |
| 648995 | F | South Regi A Level or  | 0 | 120 | N | Withdrawn   |
| 649004 | M | Sidamo Re Lower Than   | 0 | 90  | N | Pass        |
| 649009 | M | Sidamo Re A Level or   | 0 | 120 | N | Fail        |
| 649020 | M | Sidamo Re HE Qualific  | 0 | 60  | N | Withdrawn   |
| 649028 | F | South Wes A Level or   | 0 | 240 | Y | Withdrawn   |
| 649036 | M | Addis Abat A Level or  | 0 | 120 | N | Withdrawn   |
| 649079 | M | Sidamo Re Lower Than   | 0 | 60  | N | Withdrawn   |
| 649084 | M | South Regi Lower Than  | 0 | 120 | N | Pass        |
| 649093 | F | Sidamo Re HE Qualific  | 0 | 60  | N | Distinction |
| 649118 | M | Amhara Re Lower Than   | 0 | 60  | N | Pass        |
| 649141 | M | South Wes A Level or   | 0 | 90  | N | Withdrawn   |
| 649147 | M | Somalia Re Lower Than  | 0 | 180 | N | Withdrawn   |
| 649159 | M | South Wes Lower Than   | 0 | 60  | N | Pass        |
| 649161 | M | Amhara Re No Formal    | 0 | 120 | N | Withdrawn   |
| 649165 | M | South Regi A Level or  | 0 | 60  | N | Pass        |
| 649207 | M | Somalia Re A Level or  | 0 | 60  | N | Pass        |
| 649212 | M | North Regi Lower Than  | 0 | 90  | N | Pass        |
| 649230 | F | Afar Regio Lower Than  | 0 | 180 | N | Withdrawn   |
| 649258 | M | Tigrai Regi A Level or | 0 | 120 | N | Fail        |
| 649284 | M | Oromia Re Lower Than   | 0 | 120 | N | Pass        |
| 649325 | F | South Regi A Level or  | 0 | 60  | N | Withdrawn   |
| 649336 | M | South Wes A Level or   | 0 | 60  | N | Withdrawn   |

|        |   |                         |   |     |   |             |
|--------|---|-------------------------|---|-----|---|-------------|
| 649379 | F | Oromia Re A Level or I  | 0 | 120 | N | Pass        |
| 649385 | M | Oromia Re A Level or I  | 0 | 90  | Y | Withdrawn   |
| 649389 | M | Somalia Re Lower Than   | 0 | 60  | N | Withdrawn   |
| 649400 | M | Amhara Re HE Qualific   | 0 | 120 | N | Pass        |
| 649434 | M | Sidamo Re Lower Than    | 0 | 120 | N | Pass        |
| 649435 | M | North Regi Lower Than   | 0 | 90  | N | Pass        |
| 649457 | F | Amhara Re A Level or I  | 0 | 90  | N | Pass        |
| 649469 | M | Sidamo Re A Level or I  | 0 | 60  | N | Fail        |
| 649523 | M | Amhara Re Lower Than    | 0 | 120 | N | Withdrawn   |
| 649547 | M | Afar Regio Lower Than   | 0 | 60  | N | Withdrawn   |
| 649555 | M | South Regi Lower Than   | 0 | 120 | N | Withdrawn   |
| 649566 | M | North Regi Lower Than   | 0 | 120 | N | Fail        |
| 649580 | M | Sidamo Re A Level or I  | 0 | 60  | N | Withdrawn   |
| 649619 | M | Addis Abat Lower Than   | 0 | 120 | N | Distinction |
| 649735 | M | South Wes A Level or I  | 0 | 90  | N | Pass        |
| 649764 | F | Sidamo Re Lower Than    | 0 | 60  | N | Withdrawn   |
| 649806 | M | Sidamo Re A Level or I  | 0 | 60  | N | Fail        |
| 649849 | M | Oromia Re A Level or I  | 0 | 90  | N | Withdrawn   |
| 649891 | M | Sidamo Re Lower Than    | 0 | 60  | N | Withdrawn   |
| 649926 | M | Afar Regio HE Qualific  | 0 | 60  | N | Withdrawn   |
| 649952 | M | North Regi Lower Than   | 0 | 60  | N | Pass        |
| 649954 | F | Sidamo Re A Level or I  | 0 | 60  | N | Withdrawn   |
| 649979 | M | Sidamo Re A Level or I  | 0 | 120 | N | Pass        |
| 650031 | F | Amhara Re Lower Than    | 0 | 120 | N | Fail        |
| 650048 | M | South Regi Lower Than   | 0 | 120 | N | Fail        |
| 650052 | F | South Regi HE Qualific  | 0 | 120 | N | Withdrawn   |
| 650054 | F | Sidamo Re A Level or I  | 0 | 120 | N | Withdrawn   |
| 650085 | M | Somalia Re A Level or I | 0 | 90  | N | Withdrawn   |
| 650108 | F | Somalia Re A Level or I | 0 | 120 | N | Pass        |
| 650123 | F | Oromia Re A Level or I  | 0 | 60  | N | Withdrawn   |
| 650148 | M | South Regi A Level or I | 0 | 150 | N | Withdrawn   |
| 650160 | M | Tigrai Regi Lower Than  | 0 | 120 | N | Distinction |
| 650170 | M | Somalia Re Lower Than   | 0 | 60  | N | Fail        |
| 650180 | M | Sidamo Re Lower Than    | 0 | 60  | N | Withdrawn   |
| 650251 | M | Somalia Re A Level or I | 0 | 60  | N | Distinction |
| 650285 | F | Oromia Re HE Qualific   | 0 | 60  | N | Withdrawn   |
| 650287 | F | South Wes Lower Than    | 0 | 120 | N | Withdrawn   |
| 650321 | M | Addis Abat Lower Than   | 0 | 60  | N | Withdrawn   |
| 650353 | M | Addis Abat Lower Than   | 0 | 120 | N | Withdrawn   |
| 650363 | M | Oromia Re A Level or I  | 0 | 90  | N | Pass        |
| 650370 | F | Afar Regio HE Qualific  | 0 | 90  | N | Pass        |
| 650398 | M | Oromia Re A Level or I  | 0 | 180 | N | Withdrawn   |
| 650400 | M | Somalia Re A Level or I | 0 | 120 | N | Withdrawn   |
| 650424 | M | South Regi Lower Than   | 0 | 120 | N | Pass        |
| 650461 | M | Sidamo Re Lower Than    | 0 | 60  | N | Pass        |
| 650464 | M | Sidamo Re Lower Than    | 0 | 60  | N | Withdrawn   |
| 650469 | M | Sidamo Re A Level or I  | 0 | 120 | N | Pass        |



|        |   |                          |   |     |   |             |
|--------|---|--------------------------|---|-----|---|-------------|
| 650473 | M | South Regi A Level or I  | 0 | 60  | N | Pass        |
| 650543 | M | South Wes A Level or I   | 0 | 60  | N | Fail        |
| 650544 | M | South Regi Lower Tha     | 0 | 90  | N | Withdrawn   |
| 650570 | M | Sidamo Re HE Qualific    | 0 | 120 | N | Pass        |
| 650637 | M | Sidamo Re Lower Tha      | 0 | 120 | N | Withdrawn   |
| 650682 | M | Tigrai Regi Lower Tha    | 0 | 120 | N | Withdrawn   |
| 650716 | M | Sidamo Re A Level or I   | 0 | 120 | N | Fail        |
| 650717 | M | Addis Abak Lower Tha     | 0 | 150 | N | Withdrawn   |
| 650758 | M | Sidamo Re Lower Tha      | 0 | 120 | N | Fail        |
| 650791 | M | Afar Regio A Level or I  | 0 | 120 | N | Withdrawn   |
| 650861 | F | Afar Regio Post Gradu    | 0 | 60  | N | Fail        |
| 650866 | M | Tigrai Regi A Level or I | 0 | 60  | N | Pass        |
| 650923 | M | South Wes A Level or I   | 0 | 60  | N | Pass        |
| 650952 | M | South Regi Lower Tha     | 0 | 60  | N | Withdrawn   |
| 650960 | M | Addis Abak A Level or I  | 0 | 60  | N | Pass        |
| 651040 | M | Oromia Re A Level or I   | 0 | 120 | N | Pass        |
| 651121 | M | South Regi Lower Tha     | 0 | 90  | N | Pass        |
| 651126 | M | Oromia Re Lower Tha      | 0 | 120 | N | Pass        |
| 651182 | M | South Regi Lower Tha     | 0 | 60  | N | Pass        |
| 651200 | M | Amhara Re A Level or I   | 0 | 60  | N | Fail        |
| 651238 | M | Amhara Re Lower Tha      | 0 | 60  | N | Pass        |
| 651253 | M | Afar Regio HE Qualific   | 0 | 60  | N | Withdrawn   |
| 651255 | F | Tigrai Regi A Level or I | 0 | 60  | N | Fail        |
| 651330 | M | Somalia Re A Level or I  | 0 | 150 | Y | Fail        |
| 651334 | M | Amhara Re A Level or I   | 0 | 60  | N | Fail        |
| 651351 | F | Somalia Re Lower Tha     | 0 | 120 | N | Withdrawn   |
| 651354 | M | Sidamo Re Lower Tha      | 0 | 90  | N | Pass        |
| 651381 | M | South Regi Lower Tha     | 0 | 60  | N | Pass        |
| 651398 | M | South Regi Lower Tha     | 0 | 120 | N | Withdrawn   |
| 651419 | M | Tigrai Regi Lower Tha    | 0 | 60  | N | Pass        |
| 651473 | F | Amhara Re A Level or I   | 0 | 60  | N | Withdrawn   |
| 651478 | M | Addis Abak A Level or I  | 0 | 90  | N | Distinction |
| 651498 | M | Addis Abak Lower Tha     | 0 | 60  | N | Pass        |
| 651555 | M | South Regi A Level or I  | 0 | 60  | N | Distinction |
| 651598 | F | North Regi Lower Tha     | 0 | 60  | N | Distinction |
| 651608 | F | Addis Abak A Level or I  | 0 | 120 | N | Withdrawn   |
| 651611 | M | Sidamo Re Lower Tha      | 0 | 120 | Y | Withdrawn   |
| 651639 | M | Addis Abak A Level or I  | 0 | 120 | N | Withdrawn   |
| 651693 | M | South Wes A Level or I   | 0 | 60  | N | Fail        |
| 651697 | M | Addis Abak Lower Tha     | 0 | 120 | N | Withdrawn   |
| 651879 | M | South Wes A Level or I   | 0 | 60  | N | Withdrawn   |
| 651881 | M | Somalia Re A Level or I  | 0 | 60  | Y | Pass        |
| 651886 | M | Afar Regio HE Qualific   | 0 | 90  | N | Withdrawn   |
| 651927 | M | Addis Abak A Level or I  | 0 | 120 | N | Distinction |
| 651972 | F | South Wes Lower Tha      | 0 | 60  | N | Fail        |
| 651990 | M | South Wes A Level or I   | 0 | 60  | N | Pass        |
| 652008 | M | South Regi HE Qualific   | 0 | 60  | N | Pass        |

|        |   |                          |   |     |   |             |
|--------|---|--------------------------|---|-----|---|-------------|
| 652025 | M | South Regi A Level or I  | 0 | 120 | N | Withdrawn   |
| 652064 | M | South Wes Lower Tha      | 0 | 60  | N | Distinction |
| 652087 | M | South Regi A Level or I  | 0 | 60  | N | Pass        |
| 652311 | M | Amhara Re A Level or I   | 0 | 60  | N | Withdrawn   |
| 652333 | F | Addis Abak Lower Tha     | 0 | 150 | N | Pass        |
| 652335 | M | South Regi Lower Tha     | 0 | 60  | N | Pass        |
| 652336 | M | Tigrai Regi A Level or I | 0 | 120 | N | Withdrawn   |
| 652438 | F | South Wes Lower Tha      | 0 | 60  | N | Pass        |
| 652569 | M | Sidamo Re Lower Tha      | 0 | 60  | N | Withdrawn   |
| 652576 | M | Tigrai Regi HE Qualific  | 0 | 120 | N | Pass        |
| 652593 | M | South Regi Lower Tha     | 0 | 120 | N | Withdrawn   |
| 652625 | F | Tigrai Regi Lower Tha    | 0 | 60  | Y | Distinction |
| 652647 | M | South Regi Lower Tha     | 0 | 90  | N | Fail        |
| 652659 | M | Somalia Re Lower Tha     | 0 | 60  | N | Pass        |
| 652664 | M | Sidamo Re A Level or I   | 0 | 60  | N | Fail        |
| 652672 | F | South Regi A Level or I  | 0 | 60  | N | Pass        |
| 652684 | M | North Regi A Level or I  | 0 | 60  | N | Distinction |
| 652706 | M | North Regi A Level or I  | 0 | 120 | N | Withdrawn   |
| 652711 | M | Tigrai Regi Lower Tha    | 0 | 60  | N | Pass        |
| 652752 | M | Amhara Re Lower Tha      | 0 | 120 | N | Fail        |
| 652753 | M | South Regi A Level or I  | 0 | 120 | N | Pass        |
| 652769 | M | South Wes A Level or I   | 0 | 60  | N | Fail        |
| 652788 | M | South Regi Lower Tha     | 0 | 60  | N | Distinction |
| 652801 | F | Tigrai Regi Lower Tha    | 0 | 60  | Y | Withdrawn   |
| 652824 | M | South Wes Lower Tha      | 0 | 60  | N | Fail        |
| 652832 | M | Oromia Re Lower Tha      | 0 | 60  | N | Withdrawn   |
| 652887 | F | Afar Regioi A Level or I | 0 | 120 | N | Pass        |
| 652890 | M | South Regi Lower Tha     | 0 | 120 | N | Fail        |
| 652898 | M | Amhara Re Lower Tha      | 0 | 90  | N | Pass        |
| 652994 | M | Amhara Re Lower Tha      | 0 | 120 | N | Pass        |
| 652998 | M | South Regi Lower Tha     | 0 | 60  | N | Fail        |
| 653045 | M | South Wes Lower Tha      | 0 | 60  | N | Pass        |
| 653051 | F | South Regi Lower Tha     | 0 | 180 | Y | Withdrawn   |
| 653115 | F | Sidamo Re HE Qualific    | 0 | 120 | N | Pass        |
| 653144 | M | Afar Regioi HE Qualific  | 0 | 90  | N | Withdrawn   |
| 653174 | M | Addis Abak Lower Tha     | 0 | 60  | N | Withdrawn   |
| 653183 | M | Somalia Re Lower Tha     | 0 | 90  | N | Withdrawn   |
| 653206 | M | Sidamo Re Lower Tha      | 0 | 240 | N | Withdrawn   |
| 653255 | M | Sidamo Re A Level or I   | 0 | 120 | N | Withdrawn   |
| 653297 | M | North Regi Lower Tha     | 0 | 60  | N | Pass        |
| 653301 | F | South Wes A Level or I   | 0 | 90  | N | Pass        |
| 653336 | M | Sidamo Re Lower Tha      | 0 | 60  | N | Withdrawn   |
| 653356 | F | Sidamo Re Lower Tha      | 0 | 60  | N | Withdrawn   |
| 653372 | M | Amhara Re A Level or I   | 0 | 60  | N | Withdrawn   |
| 653381 | M | Addis Abak A Level or I  | 0 | 120 | N | Pass        |
| 653417 | M | Sidamo Re A Level or I   | 0 | 120 | N | Pass        |
| 653536 | M | Somalia Re Lower Tha     | 0 | 60  | N | Pass        |

|        |   |                          |   |     |   |             |
|--------|---|--------------------------|---|-----|---|-------------|
| 653558 | M | Oromia Re Lower Tha      | 0 | 60  | N | Pass        |
| 653567 | M | North Regi A Level or I  | 0 | 60  | N | Pass        |
| 653595 | M | Oromia Re HE Qualific    | 0 | 60  | N | Pass        |
| 653616 | M | South Regi Lower Tha     | 0 | 60  | N | Withdrawn   |
| 653653 | M | South Regi Lower Tha     | 0 | 90  | Y | Pass        |
| 653659 | M | North Regi A Level or I  | 0 | 60  | N | Fail        |
| 653747 | F | Tigrai Regi A Level or I | 0 | 90  | N | Withdrawn   |
| 653773 | M | Sidamo Re, A Level or I  | 0 | 60  | Y | Pass        |
| 653797 | M | Oromia Re Lower Tha      | 0 | 60  | Y | Withdrawn   |
| 653841 | M | Sidamo Re, Lower Tha     | 0 | 90  | N | Pass        |
| 653846 | M | Amhara Re A Level or I   | 0 | 120 | N | Withdrawn   |
| 653848 | M | North Regi Lower Tha     | 0 | 120 | Y | Withdrawn   |
| 653854 | M | Amhara Re HE Qualific    | 0 | 120 | N | Withdrawn   |
| 653857 | M | Afar Regio HE Qualific   | 0 | 90  | N | Fail        |
| 653988 | M | Sidamo Re, No Formal     | 0 | 120 | N | Fail        |
| 654045 | F | Tigrai Regi HE Qualific  | 0 | 60  | N | Pass        |
| 654048 | M | Sidamo Re, Lower Tha     | 0 | 240 | N | Withdrawn   |
| 654094 | M | Afar Regio Lower Tha     | 0 | 60  | Y | Withdrawn   |
| 654112 | M | South Regi Lower Tha     | 0 | 60  | N | Withdrawn   |
| 654114 | M | Sidamo Re, Lower Tha     | 0 | 120 | N | Pass        |
| 654169 | M | North Regi Lower Tha     | 0 | 60  | N | Pass        |
| 654217 | M | North Regi Lower Tha     | 0 | 60  | N | Pass        |
| 654228 | F | Afar Regio Post Gradu    | 0 | 60  | N | Withdrawn   |
| 654236 | M | North Regi A Level or I  | 0 | 90  | N | Pass        |
| 654260 | M | South Wes A Level or I   | 0 | 120 | N | Distinction |
| 654289 | M | South Regi Lower Tha     | 0 | 120 | N | Withdrawn   |
| 654322 | M | Sidamo Re, A Level or I  | 0 | 120 | Y | Withdrawn   |
| 654338 | F | South Regi Lower Tha     | 0 | 90  | N | Withdrawn   |
| 654339 | M | South Regi Lower Tha     | 0 | 60  | N | Pass        |
| 654351 | M | Afar Regio HE Qualific   | 0 | 90  | N | Fail        |
| 654407 | M | North Regi Lower Tha     | 0 | 150 | N | Withdrawn   |
| 654432 | M | Sidamo Re, HE Qualific   | 0 | 60  | N | Withdrawn   |
| 654441 | M | Sidamo Re, A Level or I  | 0 | 60  | N | Fail        |
| 654563 | M | Somalia Re Lower Tha     | 0 | 60  | N | Withdrawn   |
| 654565 | M | Addis Abak A Level or I  | 0 | 120 | N | Pass        |
| 654578 | M | North Regi A Level or I  | 0 | 60  | N | Pass        |
| 654597 | M | Addis Abak Lower Tha     | 0 | 120 | N | Pass        |
| 654619 | M | Sidamo Re, Lower Tha     | 0 | 120 | N | Withdrawn   |
| 654620 | F | South Wes A Level or I   | 0 | 120 | N | Withdrawn   |
| 654671 | F | South Regi A Level or I  | 0 | 150 | Y | Withdrawn   |
| 654677 | M | Amhara Re Lower Tha      | 0 | 60  | N | Withdrawn   |
| 654684 | F | North Regi Lower Tha     | 0 | 90  | N | Withdrawn   |
| 654692 | M | South Wes A Level or I   | 0 | 60  | N | Fail        |
| 654698 | M | Amhara Re Lower Tha      | 0 | 60  | N | Withdrawn   |
| 654732 | F | Sidamo Re, Lower Tha     | 0 | 120 | N | Withdrawn   |
| 654738 | M | Somalia Re Lower Tha     | 0 | 120 | N | Withdrawn   |
| 654816 | F | Sidamo Re, Lower Tha     | 0 | 180 | N | Withdrawn   |

|        |   |                                 |   |     |   |             |
|--------|---|---------------------------------|---|-----|---|-------------|
| 654819 | M | Tigray Region Lower Than        | 0 | 90  | Y | Distinction |
| 654824 | M | North Region Lower Than         | 0 | 60  | N | Pass        |
| 654834 | M | South Region A Level or Higher  | 0 | 120 | N | Distinction |
| 654852 | F | Somalia Region Lower Than       | 0 | 60  | N | Withdrawn   |
| 654867 | F | Afar Region HE Qualification    | 0 | 60  | N | Distinction |
| 654943 | M | Oromia Region A Level or Higher | 0 | 120 | N | Withdrawn   |
| 654947 | M | South Region Lower Than         | 0 | 60  | N | Fail        |
| 654960 | M | Addis Ababa A Level or Higher   | 0 | 120 | N | Withdrawn   |
| 655028 | M | Amhara Region Lower Than        | 0 | 120 | N | Fail        |
| 655088 | F | Addis Ababa Lower Than          | 0 | 120 | Y | Withdrawn   |
| 655113 | M | Somalia Region Lower Than       | 0 | 120 | N | Withdrawn   |
| 655115 | M | North Region Lower Than         | 0 | 60  | Y | Pass        |
| 655124 | M | South Region Lower Than         | 0 | 60  | N | Fail        |
| 655127 | F | South West A Level or Higher    | 0 | 90  | N | Distinction |
| 655353 | M | Sidamo Region HE Qualification  | 0 | 150 | N | Pass        |
| 655386 | M | Amhara Region Lower Than        | 0 | 60  | N | Distinction |
| 655402 | F | Sidamo Region Lower Than        | 0 | 150 | N | Withdrawn   |
| 655412 | M | Sidamo Region Lower Than        | 0 | 60  | N | Pass        |
| 655416 | M | Oromia Region A Level or Higher | 0 | 60  | N | Withdrawn   |
| 655417 | M | South West Lower Than           | 0 | 60  | N | Withdrawn   |
| 655445 | M | Sidamo Region A Level or Higher | 0 | 120 | N | Pass        |
| 655492 | M | Oromia Region A Level or Higher | 0 | 120 | N | Withdrawn   |
| 655569 | M | South Region Lower Than         | 0 | 120 | N | Pass        |
| 655627 | M | Sidamo Region Lower Than        | 0 | 120 | N | Withdrawn   |
| 655629 | F | South West A Level or Higher    | 0 | 120 | N | Withdrawn   |
| 655720 | M | Afar Region HE Qualification    | 0 | 120 | N | Withdrawn   |
| 655747 | F | Somalia Region Lower Than       | 0 | 80  | N | Withdrawn   |
| 655796 | M | North Region A Level or Higher  | 0 | 120 | N | Pass        |
| 655852 | M | Addis Ababa A Level or Higher   | 0 | 60  | N | Withdrawn   |
| 655927 | M | South West A Level or Higher    | 0 | 120 | N | Pass        |
| 655981 | M | Somalia Region HE Qualification | 0 | 60  | N | Pass        |
| 656029 | M | South Region Lower Than         | 0 | 150 | N | Withdrawn   |
| 656065 | F | Oromia Region HE Qualification  | 0 | 60  | N | Pass        |
| 656086 | M | North Region A Level or Higher  | 0 | 90  | N | Withdrawn   |
| 656092 | M | North Region A Level or Higher  | 0 | 120 | N | Pass        |
| 656102 | M | Amhara Region A Level or Higher | 0 | 60  | N | Withdrawn   |
| 656107 | M | Afar Region A Level or Higher   | 0 | 60  | N | Fail        |
| 656131 | M | Tigray Region Lower Than        | 0 | 60  | N | Pass        |
| 656145 | M | South Region A Level or Higher  | 0 | 120 | Y | Withdrawn   |
| 656150 | M | South Region Lower Than         | 0 | 120 | N | Withdrawn   |
| 656158 | F | Amhara Region A Level or Higher | 0 | 120 | N | Pass        |
| 656159 | M | Sidamo Region Lower Than        | 0 | 60  | N | Distinction |
| 656165 | M | Sidamo Region A Level or Higher | 0 | 60  | N | Pass        |
| 656234 | M | South West Lower Than           | 0 | 60  | N | Pass        |
| 656323 | M | South West Lower Than           | 0 | 120 | Y | Pass        |
| 656353 | M | Sidamo Region A Level or Higher | 0 | 120 | N | Pass        |
| 656360 | M | Sidamo Region Lower Than        | 0 | 180 | N | Withdrawn   |

|        |   |                          |   |     |   |             |
|--------|---|--------------------------|---|-----|---|-------------|
| 656414 | M | Somalia Re A Level or I  | 0 | 60  | N | Pass        |
| 656436 | M | South Wes A Level or I   | 0 | 90  | N | Pass        |
| 656441 | M | Addis Abak HE Qualific   | 0 | 180 | N | Withdrawn   |
| 656510 | M | Addis Abak Lower Tha     | 0 | 90  | N | Fail        |
| 656512 | M | Sidamo Re A Level or I   | 0 | 60  | N | Withdrawn   |
| 656519 | M | Somalia Re A Level or I  | 0 | 120 | Y | Withdrawn   |
| 656529 | M | South Wes A Level or I   | 0 | 60  | N | Pass        |
| 656565 | F | Sidamo Re No Formal      | 0 | 60  | N | Withdrawn   |
| 656579 | F | South Wes A Level or I   | 0 | 60  | N | Distinction |
| 656599 | M | South Regi Lower Tha     | 0 | 120 | N | Withdrawn   |
| 656607 | F | Sidamo Re Lower Tha      | 0 | 60  | N | Pass        |
| 656622 | M | South Regi Lower Tha     | 0 | 60  | N | Withdrawn   |
| 656651 | M | South Wes A Level or I   | 0 | 120 | N | Pass        |
| 656677 | M | South Regi Lower Tha     | 0 | 60  | N | Withdrawn   |
| 656693 | M | Oromia Re A Level or I   | 0 | 60  | N | Withdrawn   |
| 656734 | F | South Wes Lower Tha      | 0 | 120 | N | Distinction |
| 656791 | M | Sidamo Re A Level or I   | 0 | 90  | N | Pass        |
| 656800 | M | South Regi Lower Tha     | 0 | 240 | N | Withdrawn   |
| 656882 | M | Sidamo Re A Level or I   | 0 | 60  | N | Distinction |
| 656988 | M | Tigrai Regi Lower Tha    | 0 | 60  | N | Fail        |
| 656996 | M | Addis Abak Lower Tha     | 0 | 60  | N | Pass        |
| 657048 | M | Afar Regio HE Qualific   | 0 | 120 | N | Pass        |
| 657118 | F | Addis Abak A Level or I  | 0 | 240 | N | Withdrawn   |
| 657181 | M | Sidamo Re Lower Tha      | 0 | 120 | N | Withdrawn   |
| 657184 | M | Addis Abak Lower Tha     | 0 | 120 | N | Withdrawn   |
| 657211 | M | South Regi A Level or I  | 0 | 120 | N | Withdrawn   |
| 657220 | M | Sidamo Re Lower Tha      | 0 | 60  | N | Pass        |
| 657330 | M | North Regi A Level or I  | 0 | 60  | N | Distinction |
| 657344 | M | Addis Abak Lower Tha     | 0 | 60  | N | Distinction |
| 674222 | M | South Wes HE Qualific    | 0 | 60  | N | Pass        |
| 674226 | M | Sidamo Re A Level or I   | 0 | 60  | N | Pass        |
| 674236 | M | Tigrai Regi A Level or I | 0 | 120 | N | Distinction |
| 674260 | M | South Wes A Level or I   | 0 | 120 | N | Fail        |
| 674261 | M | Sidamo Re A Level or I   | 0 | 60  | N | Withdrawn   |
| 674262 | F | Tigrai Regi HE Qualific  | 0 | 90  | N | Distinction |
| 674320 | M | Oromia Re Lower Tha      | 0 | 120 | N | Pass        |
| 674387 | M | Amhara Re Lower Tha      | 0 | 60  | N | Pass        |
| 674406 | M | Somalia Re A Level or I  | 0 | 120 | N | Pass        |
| 674451 | M | Afar Regio HE Qualific   | 0 | 60  | N | Pass        |
| 674478 | F | Sidamo Re A Level or I   | 0 | 120 | N | Fail        |
| 674484 | M | Afar Regio A Level or I  | 0 | 60  | N | Pass        |
| 674497 | M | Tigrai Regi A Level or I | 0 | 120 | N | Pass        |
| 674509 | M | Afar Regio HE Qualific   | 0 | 60  | N | Pass        |
| 674584 | M | North Regi A Level or I  | 0 | 60  | N | Distinction |
| 674594 | M | Sidamo Re Lower Tha      | 0 | 60  | N | Fail        |
| 674617 | M | Sidamo Re HE Qualific    | 0 | 60  | N | Withdrawn   |
| 674644 | M | Sidamo Re A Level or I   | 0 | 60  | N | Pass        |

|        |   |                          |   |     |   |             |
|--------|---|--------------------------|---|-----|---|-------------|
| 674657 | M | South Regi HE Qualific   | 0 | 150 | N | Pass        |
| 674671 | M | Addis Abak Lower Tha     | 0 | 60  | N | Pass        |
| 674691 | F | South Regi HE Qualific   | 0 | 60  | N | Distinction |
| 674694 | M | Somalia Re A Level or I  | 0 | 120 | N | Pass        |
| 674699 | F | South Regi No Formal     | 0 | 120 | N | Distinction |
| 674751 | M | Amhara Re A Level or I   | 0 | 60  | N | Distinction |
| 674764 | M | Addis Abak Lower Tha     | 0 | 60  | N | Withdrawn   |
| 674814 | M | Somalia Re Lower Tha     | 0 | 240 | N | Withdrawn   |
| 674831 | M | Somalia Re Lower Tha     | 0 | 60  | Y | Pass        |
| 674870 | F | South Regi A Level or I  | 0 | 120 | N | Pass        |
| 674911 | M | South Wes Lower Tha      | 0 | 60  | N | Withdrawn   |
| 674921 | M | Sidamo Re Lower Tha      | 0 | 60  | N | Distinction |
| 674935 | M | Tigrai Regi A Level or I | 0 | 90  | N | Withdrawn   |
| 674970 | M | North Regi Lower Tha     | 0 | 120 | N | Withdrawn   |
| 675002 | M | Tigrai Regi A Level or I | 0 | 120 | N | Withdrawn   |
| 675021 | M | Afar Regi HE Qualific    | 0 | 60  | N | Distinction |
| 675046 | M | Oromia Re A Level or I   | 0 | 120 | N | Withdrawn   |
| 675054 | M | Sidamo Re HE Qualific    | 0 | 120 | N | Pass        |
| 675127 | F | Sidamo Re Lower Tha      | 0 | 120 | N | Withdrawn   |
| 675193 | M | South Wes Lower Tha      | 0 | 60  | N | Pass        |
| 675225 | M | Amhara Re Lower Tha      | 0 | 120 | Y | Pass        |
| 675233 | M | Amhara Re HE Qualific    | 0 | 90  | N | Pass        |
| 675261 | F | South Wes A Level or I   | 0 | 120 | N | Pass        |
| 675273 | F | Sidamo Re HE Qualific    | 0 | 120 | N | Fail        |
| 675279 | M | Afar Regi HE Qualific    | 0 | 60  | Y | Pass        |
| 675315 | M | South Regi HE Qualific   | 0 | 150 | N | Pass        |
| 675328 | M | Amhara Re HE Qualific    | 0 | 120 | N | Pass        |
| 675337 | M | Addis Abak Lower Tha     | 0 | 90  | N | Withdrawn   |
| 675474 | M | Tigrai Regi Lower Tha    | 0 | 90  | N | Pass        |
| 675486 | F | Amhara Re Lower Tha      | 0 | 180 | Y | Withdrawn   |
| 675514 | M | Somalia Re Lower Tha     | 0 | 60  | N | Fail        |
| 675566 | M | South Wes Lower Tha      | 0 | 60  | N | Distinction |
| 675577 | M | Addis Abak A Level or I  | 0 | 60  | Y | Fail        |
| 675613 | M | Amhara Re A Level or I   | 0 | 90  | N | Withdrawn   |
| 675636 | M | North Regi Lower Tha     | 0 | 60  | N | Pass        |
| 675669 | F | South Regi A Level or I  | 0 | 60  | N | Withdrawn   |
| 675710 | M | Oromia Re A Level or I   | 0 | 60  | N | Distinction |
| 675818 | M | Somalia Re A Level or I  | 0 | 60  | N | Withdrawn   |
| 675824 | M | Amhara Re A Level or I   | 0 | 90  | Y | Withdrawn   |
| 675829 | M | Afar Regi Lower Tha      | 0 | 120 | N | Withdrawn   |
| 675843 | M | Addis Abak Lower Tha     | 0 | 60  | Y | Withdrawn   |
| 675947 | M | South Regi Lower Tha     | 0 | 60  | N | Withdrawn   |
| 675989 | M | Sidamo Re A Level or I   | 0 | 60  | N | Distinction |
| 676007 | M | South Wes A Level or I   | 0 | 60  | N | Pass        |
| 676040 | M | Amhara Re Lower Tha      | 0 | 60  | N | Withdrawn   |
| 676064 | M | South Regi A Level or I  | 0 | 60  | N | Distinction |
| 676103 | M | South Wes A Level or I   | 0 | 120 | N | Pass        |

|        |   |             |              |   |     |   |             |
|--------|---|-------------|--------------|---|-----|---|-------------|
| 676128 | M | Sidamo Re   | A Level or I | 0 | 60  | N | Withdrawn   |
| 676139 | M | Addis Abak  | A Level or I | 0 | 60  | N | Fail        |
| 676190 | M | Tigrai Regi | A Level or I | 0 | 60  | N | Distinction |
| 676194 | M | Sidamo Re   | A Level or I | 0 | 60  | N | Withdrawn   |
| 676265 | M | South Wes   | Lower Thar   | 0 | 60  | N | Pass        |
| 676272 | M | Tigrai Regi | Lower Thar   | 0 | 60  | N | Fail        |
| 676303 | M | Sidamo Re   | Lower Thar   | 0 | 120 | N | Pass        |
| 676320 | M | Addis Abak  | Lower Thar   | 0 | 120 | N | Withdrawn   |
| 676324 | M | Somalia Re  | Lower Thar   | 0 | 60  | N | Withdrawn   |
| 676378 | M | South Wes   | HE Qualific  | 0 | 60  | N | Distinction |
| 676444 | M | South Regi  | Lower Thar   | 0 | 60  | N | Distinction |
| 676458 | M | South Wes   | Lower Thar   | 0 | 60  | N | Fail        |
| 676459 | M | Afar Regio  | Lower Thar   | 0 | 60  | N | Pass        |
| 676478 | M | South Wes   | A Level or I | 0 | 60  | N | Distinction |
| 676492 | M | Sidamo Re   | HE Qualific  | 0 | 150 | N | Pass        |
| 676600 | F | Sidamo Re   | Lower Thar   | 0 | 60  | N | Withdrawn   |
| 676610 | M | North Regi  | A Level or I | 0 | 120 | N | Distinction |
| 676626 | M | Tigrai Regi | A Level or I | 0 | 60  | N | Distinction |
| 676627 | F | Addis Abak  | Lower Thar   | 0 | 120 | N | Withdrawn   |
| 676866 | M | South Regi  | A Level or I | 0 | 90  | N | Pass        |
| 676882 | M | North Regi  | Lower Thar   | 0 | 60  | N | Pass        |
| 676930 | M | Addis Abak  | Lower Thar   | 0 | 120 | N | Withdrawn   |
| 677027 | M | Addis Abak  | HE Qualific  | 0 | 90  | N | Withdrawn   |
| 677081 | M | South Wes   | Lower Thar   | 0 | 240 | N | Withdrawn   |
| 677085 | M | North Regi  | HE Qualific  | 0 | 150 | N | Pass        |
| 677111 | F | South Regi  | Lower Thar   | 0 | 120 | N | Pass        |
| 677138 | M | Addis Abak  | A Level or I | 0 | 120 | N | Distinction |
| 677155 | F | Amhara Re   | Lower Thar   | 0 | 60  | N | Pass        |
| 677167 | F | Amhara Re   | A Level or I | 0 | 60  | N | Pass        |
| 677206 | F | South Regi  | A Level or I | 0 | 60  | N | Pass        |
| 677221 | F | Afar Regio  | HE Qualific  | 0 | 60  | N | Distinction |
| 677235 | M | Tigrai Regi | Lower Thar   | 0 | 60  | N | Fail        |
| 677327 | F | South Wes   | Lower Thar   | 0 | 60  | N | Withdrawn   |
| 677369 | M | Sidamo Re   | HE Qualific  | 0 | 120 | N | Withdrawn   |
| 677382 | M | Somalia Re  | A Level or I | 0 | 120 | N | Fail        |
| 677400 | F | Tigrai Regi | HE Qualific  | 0 | 60  | N | Distinction |
| 677436 | M | Somalia Re  | Lower Thar   | 0 | 60  | N | Pass        |
| 677456 | M | Afar Regio  | Lower Thar   | 0 | 60  | N | Pass        |
| 677486 | M | Sidamo Re   | HE Qualific  | 0 | 60  | N | Withdrawn   |
| 677546 | F | Sidamo Re   | A Level or I | 0 | 120 | N | Pass        |
| 677582 | M | Tigrai Regi | A Level or I | 0 | 120 | N | Withdrawn   |
| 677608 | M | Amhara Re   | Lower Thar   | 0 | 120 | N | Withdrawn   |
| 677643 | M | Somalia Re  | Lower Thar   | 0 | 60  | N | Withdrawn   |
| 677655 | M | Amhara Re   | Lower Thar   | 0 | 60  | N | Pass        |
| 677687 | M | Oromia Re   | Lower Thar   | 0 | 60  | Y | Fail        |
| 677701 | M | South Regi  | Lower Thar   | 0 | 180 | N | Withdrawn   |
| 677748 | M | South Regi  | A Level or I | 0 | 120 | N | Fail        |

|        |   |             |              |   |     |   |             |
|--------|---|-------------|--------------|---|-----|---|-------------|
| 677767 | F | Tigrai Regi | A Level or I | 0 | 120 | N | Fail        |
| 677782 | F | Sidamo Re   | Lower Than   | 0 | 60  | N | Withdrawn   |
| 677828 | M | Somalia Re  | A Level or I | 0 | 120 | N | Withdrawn   |
| 677833 | M | South Wes   | Lower Than   | 0 | 60  | N | Pass        |
| 677867 | M | Sidamo Re   | HE Qualific  | 0 | 60  | N | Withdrawn   |
| 677869 | M | Tigrai Regi | A Level or I | 0 | 120 | Y | Fail        |
| 678005 | M | South Regi  | A Level or I | 0 | 60  | N | Withdrawn   |
| 678044 | M | Tigrai Regi | Lower Than   | 0 | 120 | N | Withdrawn   |
| 678088 | M | South Regi  | Lower Than   | 0 | 180 | N | Pass        |
| 678090 | M | Addis Abat  | Lower Than   | 0 | 90  | N | Withdrawn   |
| 678127 | F | Sidamo Re   | Lower Than   | 0 | 60  | N | Withdrawn   |
| 678203 | M | Sidamo Re   | Lower Than   | 0 | 120 | N | Pass        |
| 678235 | F | South Regi  | A Level or I | 0 | 120 | N | Pass        |
| 678270 | M | South Regi  | Lower Than   | 0 | 60  | N | Fail        |
| 678287 | M | Afar Regioi | Lower Than   | 0 | 90  | N | Withdrawn   |
| 678346 | M | Afar Regioi | A Level or I | 0 | 120 | N | Withdrawn   |
| 678381 | M | South Wes   | A Level or I | 0 | 120 | N | Pass        |
| 678397 | M | Somalia Re  | HE Qualific  | 0 | 60  | N | Withdrawn   |
| 678407 | M | Afar Regioi | A Level or I | 0 | 240 | N | Withdrawn   |
| 678452 | M | South Regi  | A Level or I | 0 | 120 | N | Pass        |
| 678474 | M | Afar Regioi | A Level or I | 0 | 120 | N | Fail        |
| 678528 | M | North Regi  | Lower Than   | 0 | 60  | N | Fail        |
| 678619 | F | Afar Regioi | HE Qualific  | 0 | 60  | N | Withdrawn   |
| 678628 | M | Sidamo Re   | A Level or I | 0 | 120 | N | Pass        |
| 678639 | M | South Wes   | Lower Than   | 0 | 120 | N | Withdrawn   |
| 678659 | F | Oromia Re   | HE Qualific  | 0 | 60  | N | Pass        |
| 678769 | M | Sidamo Re   | A Level or I | 0 | 180 | N | Withdrawn   |
| 678819 | M | Tigrai Regi | A Level or I | 0 | 120 | N | Distinction |
| 678831 | F | Afar Regioi | HE Qualific  | 0 | 300 | N | Withdrawn   |
| 678859 | M | Amhara Re   | A Level or I | 0 | 90  | N | Distinction |
| 678877 | F | Afar Regioi | HE Qualific  | 0 | 120 | N | Withdrawn   |
| 678946 | M | Sidamo Re   | HE Qualific  | 0 | 60  | N | Pass        |
| 678954 | M | Addis Abat  | HE Qualific  | 0 | 90  | N | Distinction |
| 679019 | M | Tigrai Regi | Lower Than   | 0 | 120 | N | Fail        |
| 679036 | F | Sidamo Re   | HE Qualific  | 0 | 60  | N | Distinction |
| 679111 | M | Afar Regioi | HE Qualific  | 0 | 60  | N | Fail        |
| 679119 | M | North Regi  | Lower Than   | 0 | 120 | N | Withdrawn   |
| 679189 | M | Oromia Re   | A Level or I | 0 | 60  | N | Pass        |
| 679227 | M | Tigrai Regi | HE Qualific  | 0 | 60  | N | Pass        |
| 679237 | M | Sidamo Re   | A Level or I | 0 | 120 | N | Fail        |
| 679251 | M | Tigrai Regi | Lower Than   | 0 | 120 | Y | Fail        |
| 679262 | M | South Regi  | A Level or I | 0 | 60  | N | Pass        |
| 679269 | M | Somalia Re  | Lower Than   | 0 | 60  | Y | Withdrawn   |
| 679278 | M | Sidamo Re   | A Level or I | 0 | 60  | Y | Pass        |
| 679337 | M | Somalia Re  | Lower Than   | 0 | 60  | N | Withdrawn   |
| 679342 | M | Amhara Re   | A Level or I | 0 | 60  | N | Fail        |
| 679384 | M | Amhara Re   | HE Qualific  | 0 | 60  | N | Pass        |



|        |   |                          |   |     |   |             |
|--------|---|--------------------------|---|-----|---|-------------|
| 679386 | M | South Wes Lower Tha      | 0 | 120 | N | Pass        |
| 679402 | M | Addis Abak Lower Tha     | 0 | 120 | N | Distinction |
| 679445 | M | Oromia Re HE Qualific    | 0 | 60  | N | Pass        |
| 679448 | F | Addis Abak Lower Tha     | 0 | 90  | N | Pass        |
| 679498 | M | Oromia Re A Level or I   | 0 | 120 | N | Pass        |
| 679502 | M | South Regi A Level or I  | 0 | 180 | N | Withdrawn   |
| 679509 | M | Oromia Re HE Qualific    | 0 | 60  | N | Pass        |
| 679594 | M | Sidamo Re A Level or I   | 0 | 60  | N | Distinction |
| 679676 | F | Tigrai Regi Lower Tha    | 0 | 60  | N | Withdrawn   |
| 679688 | M | South Wes Lower Tha      | 0 | 60  | N | Withdrawn   |
| 679749 | M | Afar Regi HE Qualific    | 0 | 120 | N | Withdrawn   |
| 679788 | M | South Regi HE Qualific   | 0 | 120 | N | Pass        |
| 679790 | F | Sidamo Re HE Qualific    | 0 | 120 | N | Pass        |
| 679938 | M | Tigrai Regi Lower Tha    | 0 | 120 | N | Withdrawn   |
| 679939 | M | Addis Abak A Level or I  | 0 | 120 | N | Pass        |
| 679949 | F | South Regi A Level or I  | 0 | 60  | N | Fail        |
| 680014 | M | South Wes A Level or I   | 0 | 60  | N | Distinction |
| 680018 | M | Afar Regi A Level or I   | 0 | 120 | N | Withdrawn   |
| 680027 | M | Sidamo Re A Level or I   | 0 | 120 | Y | Distinction |
| 680072 | F | North Regi Lower Tha     | 0 | 120 | N | Withdrawn   |
| 680080 | M | North Regi A Level or I  | 0 | 90  | N | Pass        |
| 680145 | M | Amhara Re Lower Tha      | 0 | 90  | Y | Pass        |
| 680212 | M | Somalia Re A Level or I  | 0 | 90  | N | Fail        |
| 680222 | F | Oromia Re Lower Tha      | 0 | 180 | N | Withdrawn   |
| 680231 | M | South Wes Lower Tha      | 0 | 90  | N | Withdrawn   |
| 680255 | M | Sidamo Re A Level or I   | 0 | 90  | N | Fail        |
| 680266 | F | Sidamo Re HE Qualific    | 0 | 60  | N | Distinction |
| 680270 | M | South Wes Lower Tha      | 0 | 60  | N | Fail        |
| 680273 | M | Sidamo Re Lower Tha      | 0 | 60  | N | Withdrawn   |
| 680312 | M | South Wes A Level or I   | 0 | 120 | N | Withdrawn   |
| 680322 | M | Tigrai Regi A Level or I | 0 | 150 | Y | Pass        |
| 680343 | M | South Regi A Level or I  | 0 | 60  | N | Distinction |
| 680348 | M | Afar Regi HE Qualific    | 0 | 120 | N | Pass        |
| 680349 | M | Sidamo Re A Level or I   | 0 | 60  | N | Withdrawn   |
| 680374 | M | Somalia Re Lower Tha     | 0 | 60  | N | Withdrawn   |
| 680410 | M | Amhara Re A Level or I   | 0 | 150 | N | Withdrawn   |
| 680443 | M | Sidamo Re Lower Tha      | 0 | 180 | N | Distinction |
| 680464 | M | South Wes A Level or I   | 0 | 120 | N | Distinction |
| 680506 | F | Addis Abak HE Qualific   | 0 | 60  | N | Distinction |
| 680517 | M | Amhara Re Lower Tha      | 0 | 120 | N | Withdrawn   |
| 680572 | M | Oromia Re Lower Tha      | 0 | 150 | N | Pass        |
| 680708 | F | Afar Regi Lower Tha      | 0 | 120 | N | Pass        |
| 680713 | M | Afar Regi A Level or I   | 0 | 60  | N | Pass        |
| 680714 | M | Addis Abak A Level or I  | 0 | 90  | N | Withdrawn   |
| 680715 | M | Somalia Re A Level or I  | 0 | 120 | N | Withdrawn   |
| 680747 | M | South Regi Lower Tha     | 0 | 60  | N | Pass        |
| 680766 | M | Sidamo Re Lower Tha      | 0 | 120 | N | Withdrawn   |

|        |   |             |             |   |     |   |             |
|--------|---|-------------|-------------|---|-----|---|-------------|
| 680775 | M | Tigrai Regi | Lower Than  | 0 | 120 | N | Pass        |
| 680810 | F | Amhara Re   | A Level or  | 0 | 120 | N | Distinction |
| 680855 | M | Tigrai Regi | Lower Than  | 0 | 60  | N | Fail        |
| 680872 | M | Somalia Re  | A Level or  | 0 | 60  | N | Pass        |
| 680912 | F | Sidamo Re   | Lower Than  | 0 | 120 | N | Pass        |
| 680938 | F | Sidamo Re   | A Level or  | 0 | 180 | N | Withdrawn   |
| 680955 | M | South Wes   | A Level or  | 0 | 60  | N | Pass        |
| 680974 | M | Addis Abat  | HE Qualific | 0 | 60  | N | Distinction |
| 681004 | M | Sidamo Re   | No Formal   | 0 | 60  | N | Distinction |
| 681052 | M | Sidamo Re   | Lower Than  | 0 | 90  | N | Withdrawn   |
| 681063 | M | South Regi  | Lower Than  | 0 | 60  | N | Withdrawn   |
| 681073 | M | Sidamo Re   | Lower Than  | 0 | 90  | N | Withdrawn   |
| 681120 | M | Somalia Re  | Lower Than  | 0 | 120 | Y | Withdrawn   |
| 681152 | F | South Regi  | Lower Than  | 0 | 120 | N | Withdrawn   |
| 681235 | F | South Regi  | Lower Than  | 0 | 120 | N | Pass        |
| 681277 | M | Sidamo Re   | Lower Than  | 0 | 120 | N | Withdrawn   |
| 681298 | M | Tigrai Regi | A Level or  | 0 | 90  | N | Fail        |
| 681328 | M | Amhara Re   | A Level or  | 0 | 60  | N | Distinction |
| 681335 | M | Amhara Re   | Lower Than  | 0 | 120 | N | Withdrawn   |
| 681341 | M | Somalia Re  | A Level or  | 0 | 60  | N | Fail        |
| 681352 | F | South Wes   | A Level or  | 0 | 120 | Y | Pass        |
| 681354 | M | South Regi  | A Level or  | 0 | 60  | N | Pass        |
| 681393 | M | South Regi  | Lower Than  | 0 | 60  | N | Withdrawn   |
| 681397 | M | South Regi  | Lower Than  | 0 | 120 | N | Withdrawn   |
| 681452 | M | Addis Abat  | A Level or  | 0 | 90  | N | Pass        |
| 681490 | M | Sidamo Re   | A Level or  | 0 | 120 | N | Distinction |
| 681608 | M | North Regi  | A Level or  | 0 | 60  | N | Pass        |
| 681633 | F | Afar Regio  | A Level or  | 0 | 60  | N | Pass        |
| 681652 | M | Somalia Re  | A Level or  | 0 | 90  | N | Pass        |
| 681655 | M | South Regi  | A Level or  | 0 | 90  | N | Pass        |
| 681658 | M | Somalia Re  | A Level or  | 0 | 60  | N | Pass        |
| 681691 | M | Amhara Re   | A Level or  | 0 | 60  | N | Withdrawn   |
| 681735 | M | Afar Regio  | Lower Than  | 0 | 120 | N | Withdrawn   |
| 681755 | M | North Regi  | HE Qualific | 0 | 120 | N | Pass        |
| 681763 | M | Amhara Re   | Lower Than  | 0 | 60  | N | Pass        |
| 681938 | M | South Wes   | A Level or  | 0 | 120 | N | Distinction |
| 681973 | M | Oromia Re   | A Level or  | 0 | 60  | N | Pass        |
| 682015 | M | Amhara Re   | Lower Than  | 0 | 60  | Y | Withdrawn   |
| 682019 | M | South Regi  | Lower Than  | 0 | 60  | N | Withdrawn   |
| 682025 | F | Oromia Re   | Lower Than  | 0 | 240 | Y | Withdrawn   |
| 682050 | F | Afar Regio  | Lower Than  | 0 | 120 | N | Fail        |
| 682070 | M | South Wes   | HE Qualific | 0 | 90  | N | Pass        |
| 682098 | M | Addis Abat  | A Level or  | 0 | 60  | N | Withdrawn   |
| 682142 | M | Amhara Re   | Lower Than  | 0 | 60  | N | Withdrawn   |
| 682276 | M | South Regi  | A Level or  | 0 | 60  | N | Withdrawn   |
| 682298 | F | Somalia Re  | A Level or  | 0 | 120 | Y | Pass        |
| 682358 | M | South Regi  | A Level or  | 0 | 180 | Y | Withdrawn   |

|        |   |                          |   |     |   |             |
|--------|---|--------------------------|---|-----|---|-------------|
| 682359 | F | North Regi A Level or I  | 0 | 120 | N | Withdrawn   |
| 682390 | M | Afar Regio HE Qualific   | 0 | 60  | Y | Pass        |
| 682391 | M | Afar Regio HE Qualific   | 0 | 60  | N | Fail        |
| 682436 | M | North Regi Lower Tha     | 0 | 90  | N | Pass        |
| 682437 | M | South Regi Lower Tha     | 0 | 60  | N | Pass        |
| 682482 | M | Sidamo Re Lower Tha      | 0 | 120 | N | Withdrawn   |
| 682504 | M | Tigrai Regi A Level or I | 0 | 90  | N | Withdrawn   |
| 682505 | M | North Regi Lower Tha     | 0 | 60  | N | Withdrawn   |
| 682511 | M | South Wes A Level or I   | 0 | 120 | N | Pass        |
| 682524 | M | South Regi A Level or I  | 0 | 60  | Y | Withdrawn   |
| 682539 | M | Addis Abak A Level or I  | 0 | 120 | N | Distinction |
| 682546 | M | Oromia Re Lower Tha      | 0 | 120 | N | Withdrawn   |
| 682565 | M | Somalia Re Lower Tha     | 0 | 240 | N | Withdrawn   |
| 682569 | M | South Regi A Level or I  | 0 | 120 | N | Pass        |
| 682578 | M | South Wes Lower Tha      | 0 | 120 | N | Fail        |
| 682588 | M | Oromia Re Lower Tha      | 0 | 60  | N | Fail        |
| 682596 | F | Sidamo Re A Level or I   | 0 | 60  | N | Withdrawn   |
| 682613 | M | Tigrai Regi HE Qualific  | 0 | 60  | N | Pass        |
| 682617 | M | Amhara Re Lower Tha      | 0 | 60  | N | Withdrawn   |
| 682632 | F | Sidamo Re A Level or I   | 0 | 60  | N | Pass        |
| 682671 | F | Amhara Re Lower Tha      | 0 | 120 | Y | Withdrawn   |
| 682695 | F | Addis Abak Lower Tha     | 0 | 150 | Y | Pass        |
| 682719 | M | Addis Abak Lower Tha     | 0 | 60  | N | Withdrawn   |
| 682753 | M | South Regi A Level or I  | 0 | 60  | N | Pass        |
| 682839 | M | Sidamo Re Lower Tha      | 0 | 120 | N | Pass        |
| 682863 | F | Addis Abak Lower Tha     | 0 | 60  | N | Withdrawn   |
| 682894 | M | South Regi Lower Tha     | 0 | 60  | N | Withdrawn   |
| 682946 | M | Addis Abak Lower Tha     | 0 | 120 | N | Withdrawn   |
| 682963 | M | South Regi HE Qualific   | 0 | 120 | N | Pass        |
| 682981 | M | Sidamo Re A Level or I   | 0 | 120 | Y | Distinction |
| 682982 | M | Somalia Re A Level or I  | 0 | 120 | N | Withdrawn   |
| 682983 | M | South Wes A Level or I   | 0 | 60  | N | Pass        |
| 682985 | M | Afar Regio HE Qualific   | 0 | 60  | N | Fail        |
| 682990 | M | Oromia Re A Level or I   | 0 | 60  | N | Distinction |
| 683033 | F | South Regi Lower Tha     | 0 | 120 | N | Pass        |
| 683094 | M | South Wes Lower Tha      | 0 | 60  | N | Fail        |
| 683144 | M | Amhara Re HE Qualific    | 0 | 60  | N | Withdrawn   |
| 683177 | F | South Regi A Level or I  | 0 | 120 | N | Withdrawn   |
| 683178 | M | Amhara Re A Level or I   | 0 | 60  | N | Pass        |
| 683243 | M | South Regi A Level or I  | 0 | 90  | N | Fail        |
| 683273 | M | Sidamo Re A Level or I   | 0 | 120 | Y | Fail        |
| 683305 | F | Tigrai Regi HE Qualific  | 0 | 120 | N | Pass        |
| 683323 | M | Tigrai Regi Lower Tha    | 0 | 120 | Y | Fail        |
| 683346 | M | North Regi Lower Tha     | 0 | 60  | N | Distinction |
| 683347 | M | Amhara Re A Level or I   | 0 | 120 | N | Withdrawn   |
| 683352 | M | Sidamo Re Lower Tha      | 0 | 60  | N | Pass        |
| 683353 | M | Tigrai Regi Lower Tha    | 0 | 90  | N | Pass        |

|        |   |                          |   |     |   |             |
|--------|---|--------------------------|---|-----|---|-------------|
| 683360 | M | Oromia Re A Level or l   | 0 | 120 | N | Withdrawn   |
| 683375 | M | Amhara Re Lower Tha      | 0 | 120 | N | Pass        |
| 683403 | M | Tigrai Regi A Level or l | 0 | 60  | N | Distinction |
| 683427 | M | Amhara Re Lower Tha      | 0 | 60  | N | Withdrawn   |
| 683446 | M | South Regi Lower Tha     | 0 | 60  | N | Fail        |
| 683467 | M | Addis Abak Lower Tha     | 0 | 120 | Y | Pass        |
| 683508 | M | South Regi A Level or l  | 0 | 60  | N | Fail        |
| 683530 | M | North Regi Lower Tha     | 0 | 60  | N | Distinction |
| 683547 | M | South Regi Lower Tha     | 0 | 120 | N | Withdrawn   |
| 683550 | M | Addis Abak Lower Tha     | 0 | 60  | N | Pass        |
| 683555 | M | Addis Abak Lower Tha     | 0 | 60  | N | Withdrawn   |
| 683576 | M | Afar Regio A Level or l  | 0 | 60  | N | Withdrawn   |
| 683604 | M | South Regi HE Qualific   | 0 | 90  | N | Pass        |
| 683624 | M | Tigrai Regi Lower Tha    | 0 | 120 | N | Distinction |
| 683628 | M | Sidamo Re A Level or l   | 0 | 60  | N | Withdrawn   |
| 683642 | M | Sidamo Re A Level or l   | 0 | 120 | N | Withdrawn   |
| 683699 | F | Oromia Re A Level or l   | 0 | 60  | Y | Withdrawn   |
| 683745 | M | Afar Regio A Level or l  | 0 | 60  | N | Fail        |
| 683764 | M | Afar Regio A Level or l  | 0 | 60  | N | Fail        |
| 683772 | M | Sidamo Re A Level or l   | 0 | 60  | N | Withdrawn   |
| 683820 | M | Afar Regio Lower Tha     | 0 | 90  | N | Pass        |
| 683832 | M | South Regi A Level or l  | 0 | 90  | N | Withdrawn   |
| 683902 | M | Somalia Re A Level or l  | 0 | 60  | N | Pass        |
| 683912 | F | South Regi A Level or l  | 0 | 120 | N | Withdrawn   |
| 683934 | M | Somalia Re Lower Tha     | 0 | 60  | N | Pass        |
| 684013 | M | Tigrai Regi Lower Tha    | 0 | 60  | N | Distinction |
| 684014 | F | North Regi A Level or l  | 0 | 120 | N | Withdrawn   |
| 684040 | M | North Regi A Level or l  | 0 | 120 | N | Withdrawn   |
| 684075 | F | Tigrai Regi A Level or l | 0 | 60  | N | Fail        |
| 684183 | M | North Regi A Level or l  | 0 | 60  | N | Pass        |
| 684311 | M | South Regi A Level or l  | 0 | 90  | N | Pass        |
| 684313 | M | Addis Abak Lower Tha     | 0 | 120 | N | Withdrawn   |
| 684383 | M | Addis Abak A Level or l  | 0 | 60  | N | Pass        |
| 684386 | M | Amhara Re Lower Tha      | 0 | 90  | N | Pass        |
| 684526 | M | Addis Abak Lower Tha     | 0 | 120 | N | Withdrawn   |
| 684572 | M | South Wes Lower Tha      | 0 | 120 | N | Withdrawn   |
| 684579 | M | Addis Abak A Level or l  | 0 | 150 | N | Withdrawn   |
| 684592 | M | South Wes A Level or l   | 0 | 120 | N | Pass        |
| 684594 | M | Addis Abak Lower Tha     | 0 | 90  | N | Withdrawn   |
| 684671 | M | Oromia Re A Level or l   | 0 | 60  | N | Pass        |
| 684675 | M | South Wes Lower Tha      | 0 | 120 | N | Pass        |
| 684676 | M | Amhara Re Lower Tha      | 0 | 60  | N | Fail        |
| 684726 | F | Sidamo Re Lower Tha      | 0 | 60  | N | Withdrawn   |
| 684882 | M | Tigrai Regi A Level or l | 0 | 120 | N | Pass        |
| 684981 | M | Amhara Re Lower Tha      | 0 | 60  | N | Withdrawn   |
| 684983 | M | Sidamo Re A Level or l   | 0 | 150 | N | Withdrawn   |
| 685004 | M | Oromia Re Lower Tha      | 0 | 90  | N | Fail        |

|        |   |                         |   |     |   |             |
|--------|---|-------------------------|---|-----|---|-------------|
| 685042 | M | South Regi HE Qualific  | 0 | 150 | N | Withdrawn   |
| 685100 | M | Addis Abak Lower Thar   | 0 | 60  | N | Withdrawn   |
| 685105 | M | South Wes Lower Thar    | 0 | 180 | N | Fail        |
| 685128 | M | Amhara Re A Level or I  | 0 | 120 | N | Pass        |
| 685140 | M | Addis Abak HE Qualific  | 0 | 120 | N | Pass        |
| 685155 | M | Amhara Re Lower Thar    | 0 | 60  | N | Pass        |
| 685192 | M | Sidamo Re Lower Thar    | 0 | 180 | N | Withdrawn   |
| 685212 | M | South Regi HE Qualific  | 0 | 120 | N | Distinction |
| 685276 | F | Sidamo Re Lower Thar    | 0 | 90  | N | Distinction |
| 685283 | M | Afar Regio Lower Thar   | 0 | 60  | N | Fail        |
| 685330 | M | South Wes Lower Thar    | 0 | 60  | N | Withdrawn   |
| 685333 | M | South Regi Lower Thar   | 0 | 120 | N | Withdrawn   |
| 685339 | M | Somalia Re A Level or I | 0 | 90  | N | Pass        |
| 685367 | M | South Wes Lower Thar    | 0 | 60  | Y | Fail        |
| 685373 | M | Sidamo Re No Formal     | 0 | 60  | N | Distinction |
| 685378 | M | South Regi A Level or I | 0 | 120 | N | Pass        |
| 685410 | M | North Regi Lower Thar   | 0 | 120 | N | Pass        |
| 685439 | F | South Wes A Level or I  | 0 | 60  | N | Withdrawn   |
| 685512 | M | Oromia Re A Level or I  | 0 | 120 | N | Withdrawn   |
| 685565 | M | Somalia Re Lower Thar   | 0 | 120 | Y | Withdrawn   |
| 685619 | M | Afar Regio HE Qualific  | 0 | 105 | Y | Pass        |
| 685657 | M | South Regi A Level or I | 0 | 60  | N | Withdrawn   |
| 685663 | F | Oromia Re A Level or I  | 0 | 90  | N | Withdrawn   |
| 685683 | M | Somalia Re Lower Thar   | 0 | 60  | N | Withdrawn   |
| 685705 | M | Sidamo Re A Level or I  | 0 | 120 | N | Pass        |
| 685708 | F | Sidamo Re A Level or I  | 0 | 120 | N | Pass        |
| 685772 | M | South Regi Lower Thar   | 0 | 60  | N | Pass        |
| 685802 | M | South Wes Lower Thar    | 0 | 120 | N | Withdrawn   |
| 685807 | M | Addis Abak Lower Thar   | 0 | 120 | N | Withdrawn   |
| 685831 | M | South Wes A Level or I  | 0 | 90  | N | Pass        |
| 685860 | M | Addis Abak A Level or I | 0 | 210 | N | Withdrawn   |
| 685920 | M | Sidamo Re A Level or I  | 0 | 120 | Y | Withdrawn   |
| 685928 | M | Amhara Re A Level or I  | 0 | 120 | N | Fail        |
| 685952 | M | Sidamo Re A Level or I  | 0 | 120 | N | Fail        |
| 685998 | M | Oromia Re Lower Thar    | 0 | 60  | N | Withdrawn   |
| 686065 | M | Afar Regio A Level or I | 0 | 60  | N | Distinction |
| 686100 | M | Somalia Re Lower Thar   | 0 | 90  | N | Withdrawn   |
| 686164 | M | Afar Regio Lower Thar   | 0 | 60  | N | Fail        |
| 686314 | M | South Wes A Level or I  | 0 | 120 | N | Pass        |
| 686317 | F | South Regi A Level or I | 0 | 120 | N | Pass        |
| 686344 | M | Somalia Re Lower Thar   | 0 | 60  | N | Pass        |
| 686348 | M | Addis Abak A Level or I | 0 | 120 | Y | Pass        |
| 686358 | M | Somalia Re Lower Thar   | 0 | 120 | N | Withdrawn   |
| 686390 | M | Oromia Re HE Qualific   | 0 | 120 | N | Withdrawn   |
| 686448 | M | Somalia Re A Level or I | 0 | 60  | N | Withdrawn   |
| 686458 | M | South Regi Lower Thar   | 0 | 60  | Y | Withdrawn   |
| 686498 | M | North Regi HE Qualific  | 0 | 60  | N | Pass        |

|        |   |                          |   |     |   |             |
|--------|---|--------------------------|---|-----|---|-------------|
| 686522 | M | South Regi HE Qualific   | 0 | 90  | N | Pass        |
| 686558 | M | Somalia Re A Level or I  | 0 | 120 | N | Pass        |
| 686700 | M | Amhara Re A Level or I   | 0 | 120 | N | Pass        |
| 686705 | F | Oromia Re A Level or I   | 0 | 120 | N | Pass        |
| 686760 | M | Sidamo Re HE Qualific    | 0 | 120 | N | Withdrawn   |
| 686786 | M | Addis Abak Lower Tha     | 0 | 60  | Y | Fail        |
| 686799 | M | South Regi Lower Tha     | 0 | 90  | N | Withdrawn   |
| 686852 | F | Oromia Re Lower Tha      | 0 | 180 | N | Withdrawn   |
| 686869 | M | South Regi Lower Tha     | 0 | 150 | N | Withdrawn   |
| 686946 | M | Sidamo Re A Level or I   | 0 | 120 | N | Fail        |
| 687007 | M | South Regi Lower Tha     | 0 | 60  | N | Fail        |
| 687033 | M | Tigrai Regi A Level or I | 0 | 120 | N | Fail        |
| 687073 | M | South Wes A Level or I   | 0 | 120 | N | Withdrawn   |
| 687112 | M | Amhara Re Lower Tha      | 0 | 120 | N | Pass        |
| 687115 | M | South Wes A Level or I   | 0 | 120 | N | Pass        |
| 687288 | M | South Regi A Level or I  | 0 | 90  | N | Withdrawn   |
| 687304 | M | Addis Abak A Level or I  | 0 | 120 | N | Fail        |
| 687319 | M | South Regi Lower Tha     | 0 | 240 | N | Withdrawn   |
| 687331 | M | Tigrai Regi Lower Tha    | 0 | 60  | Y | Fail        |
| 687341 | M | South Wes A Level or I   | 0 | 60  | N | Withdrawn   |
| 687345 | M | South Regi A Level or I  | 0 | 90  | N | Fail        |
| 687351 | M | Afar Regio HE Qualific   | 0 | 60  | N | Pass        |
| 687410 | M | North Regi Lower Tha     | 0 | 120 | N | Pass        |
| 687434 | M | Sidamo Re Lower Tha      | 0 | 90  | N | Distinction |
| 687448 | M | Sidamo Re Lower Tha      | 0 | 120 | N | Withdrawn   |
| 687468 | F | South Wes HE Qualific    | 0 | 60  | N | Distinction |
| 687485 | F | South Regi A Level or I  | 0 | 180 | N | Pass        |
| 687503 | F | South Wes Lower Tha      | 0 | 120 | N | Pass        |
| 687510 | M | South Regi Lower Tha     | 0 | 240 | N | Withdrawn   |
| 687511 | M | Sidamo Re Lower Tha      | 0 | 120 | N | Withdrawn   |
| 687525 | M | South Wes A Level or I   | 0 | 60  | N | Fail        |
| 687686 | M | South Regi A Level or I  | 0 | 120 | N | Fail        |
| 687747 | M | Sidamo Re A Level or I   | 0 | 60  | N | Withdrawn   |
| 687752 | M | South Regi A Level or I  | 0 | 120 | N | Withdrawn   |
| 687795 | M | Oromia Re Lower Tha      | 0 | 120 | N | Withdrawn   |
| 687828 | M | South Wes Lower Tha      | 0 | 60  | N | Fail        |
| 687846 | M | Somalia Re A Level or I  | 0 | 60  | N | Pass        |
| 687910 | M | Addis Abak Lower Tha     | 0 | 60  | N | Pass        |
| 687930 | F | Addis Abak Lower Tha     | 0 | 60  | N | Pass        |
| 687931 | M | South Regi A Level or I  | 0 | 120 | N | Pass        |
| 687988 | M | South Wes Lower Tha      | 0 | 60  | N | Pass        |
| 688005 | M | South Regi Lower Tha     | 0 | 60  | N | Withdrawn   |
| 688008 | F | Sidamo Re HE Qualific    | 0 | 120 | N | Pass        |
| 688071 | M | Afar Regio A Level or I  | 0 | 120 | N | Fail        |
| 688097 | M | Oromia Re A Level or I   | 0 | 120 | N | Withdrawn   |
| 688127 | M | Somalia Re A Level or I  | 0 | 60  | N | Distinction |
| 688136 | M | Addis Abak Lower Tha     | 0 | 150 | N | Fail        |

|        |   |                          |   |     |   |             |
|--------|---|--------------------------|---|-----|---|-------------|
| 688159 | M | South Wes A Level or I   | 0 | 120 | N | Withdrawn   |
| 688187 | M | Sidamo Re A Level or I   | 0 | 60  | N | Withdrawn   |
| 688192 | F | Tigrai Regi A Level or I | 0 | 90  | N | Fail        |
| 688203 | M | Sidamo Re Lower Than     | 0 | 60  | N | Withdrawn   |
| 688225 | M | Afar Regi Lower Than     | 0 | 60  | N | Fail        |
| 688250 | M | Tigrai Regi A Level or I | 0 | 60  | N | Fail        |
| 688251 | M | Afar Regi HE Qualific    | 0 | 120 | N | Withdrawn   |
| 688265 | M | Addis Abat Lower Than    | 0 | 60  | N | Fail        |
| 688297 | M | South Wes A Level or I   | 0 | 120 | N | Withdrawn   |
| 688326 | M | Tigrai Regi HE Qualific  | 0 | 90  | N | Withdrawn   |
| 688337 | M | South Wes A Level or I   | 0 | 120 | N | Pass        |
| 688442 | F | South Regi HE Qualific   | 0 | 60  | N | Withdrawn   |
| 688453 | M | Tigrai Regi Lower Than   | 0 | 120 | N | Fail        |
| 688470 | M | Somalia Re Lower Than    | 0 | 60  | N | Fail        |
| 688475 | M | South Wes A Level or I   | 0 | 60  | N | Withdrawn   |
| 688509 | M | Sidamo Re A Level or I   | 0 | 120 | N | Withdrawn   |
| 688532 | M | Sidamo Re Lower Than     | 0 | 60  | Y | Withdrawn   |
| 688543 | F | Amhara Re HE Qualific    | 0 | 120 | N | Pass        |
| 688664 | M | Oromia Re A Level or I   | 0 | 60  | Y | Withdrawn   |
| 688667 | M | Amhara Re HE Qualific    | 0 | 120 | N | Pass        |
| 688685 | M | Afar Regi A Level or I   | 0 | 120 | N | Pass        |
| 688727 | M | Somalia Re Lower Than    | 0 | 120 | N | Distinction |
| 688752 | F | Somalia Re Lower Than    | 0 | 120 | N | Withdrawn   |
| 688881 | F | Tigrai Regi Lower Than   | 0 | 240 | N | Withdrawn   |
| 688891 | M | Somalia Re A Level or I  | 0 | 180 | N | Fail        |
| 688895 | M | South Wes Lower Than     | 0 | 60  | N | Distinction |
| 688904 | M | South Regi Lower Than    | 0 | 60  | N | Withdrawn   |
| 688937 | M | Sidamo Re Lower Than     | 0 | 120 | Y | Withdrawn   |
| 688964 | M | South Regi Lower Than    | 0 | 120 | N | Withdrawn   |
| 688976 | M | Amhara Re A Level or I   | 0 | 120 | N | Fail        |
| 689005 | M | South Wes A Level or I   | 0 | 60  | N | Pass        |
| 689042 | M | South Regi Lower Than    | 0 | 90  | N | Withdrawn   |
| 689051 | M | Amhara Re Lower Than     | 0 | 120 | N | Withdrawn   |
| 689052 | M | Amhara Re HE Qualific    | 0 | 60  | N | Fail        |
| 689056 | M | North Regi A Level or I  | 0 | 60  | N | Pass        |
| 689225 | M | Afar Regi A Level or I   | 0 | 60  | N | Withdrawn   |
| 689260 | M | Amhara Re A Level or I   | 0 | 120 | Y | Pass        |
| 689280 | M | Amhara Re A Level or I   | 0 | 60  | N | Distinction |
| 689290 | F | South Regi Lower Than    | 0 | 120 | N | Withdrawn   |
| 689347 | M | South Regi A Level or I  | 0 | 60  | N | Pass        |
| 689352 | M | Sidamo Re A Level or I   | 0 | 120 | N | Withdrawn   |
| 689444 | F | Afar Regi A Level or I   | 0 | 60  | N | Fail        |
| 689498 | M | North Regi Lower Than    | 0 | 240 | N | Withdrawn   |
| 689533 | F | North Regi A Level or I  | 0 | 120 | N | Withdrawn   |
| 689582 | M | South Regi Lower Than    | 0 | 60  | N | Withdrawn   |
| 689585 | M | Amhara Re A Level or I   | 0 | 120 | Y | Withdrawn   |
| 689626 | M | Sidamo Re Lower Than     | 0 | 120 | N | Fail        |

|        |   |                         |   |     |   |             |
|--------|---|-------------------------|---|-----|---|-------------|
| 689640 | M | Sidamo Re A Level or I  | 0 | 120 | N | Withdrawn   |
| 689747 | F | Amhara Re Lower Tha     | 0 | 120 | Y | Withdrawn   |
| 689751 | M | Amhara Re A Level or I  | 0 | 60  | N | Withdrawn   |
| 689761 | F | Sidamo Re Lower Tha     | 0 | 60  | N | Withdrawn   |
| 689796 | F | Sidamo Re Lower Tha     | 0 | 60  | N | Pass        |
| 689827 | F | South Wes A Level or I  | 0 | 60  | N | Withdrawn   |
| 689832 | M | South Regi Lower Tha    | 0 | 60  | Y | Pass        |
| 689855 | M | South Wes A Level or I  | 0 | 150 | N | Distinction |
| 689924 | M | Somalia Re Lower Tha    | 0 | 120 | N | Pass        |
| 689977 | M | Addis Abak Lower Tha    | 0 | 120 | N | Withdrawn   |
| 690075 | M | Sidamo Re Lower Tha     | 0 | 120 | N | Pass        |
| 690137 | M | Addis Abak Lower Tha    | 0 | 60  | N | Withdrawn   |
| 690174 | F | Addis Abak A Level or I | 0 | 120 | N | Withdrawn   |
| 690198 | F | South Regi A Level or I | 0 | 60  | N | Distinction |
| 690296 | M | Oromia Re Lower Tha     | 0 | 60  | N | Withdrawn   |
| 690382 | M | Afar Regio HE Qualific  | 0 | 120 | N | Pass        |
| 690559 | M | Sidamo Re Lower Tha     | 0 | 120 | N | Withdrawn   |
| 690585 | M | Amhara Re Lower Tha     | 0 | 60  | N | Fail        |
| 690628 | M | Afar Regio HE Qualific  | 0 | 120 | N | Pass        |
| 690631 | M | Afar Regio A Level or I | 0 | 240 | N | Withdrawn   |
| 690635 | M | Somalia Re HE Qualific  | 0 | 60  | N | Distinction |
| 690656 | M | Sidamo Re Lower Tha     | 0 | 150 | Y | Withdrawn   |
| 690687 | M | South Regi A Level or I | 0 | 180 | N | Withdrawn   |
| 690746 | F | Afar Regio HE Qualific  | 0 | 90  | N | Distinction |
| 690832 | M | Afar Regio A Level or I | 0 | 120 | N | Fail        |
| 690872 | M | Somalia Re Lower Tha    | 0 | 120 | N | Pass        |
| 690962 | M | Oromia Re A Level or I  | 0 | 180 | N | Withdrawn   |
| 691056 | M | Amhara Re Lower Tha     | 0 | 180 | N | Withdrawn   |
| 691177 | M | South Regi A Level or I | 0 | 120 | N | Fail        |
| 691253 | M | South Regi Lower Tha    | 0 | 120 | N | Withdrawn   |
| 691269 | M | South Regi Lower Tha    | 0 | 60  | N | Pass        |
| 691280 | M | Addis Abak HE Qualific  | 0 | 150 | N | Pass        |
| 691288 | F | Afar Regio Lower Tha    | 0 | 120 | N | Fail        |
| 691326 | F | Afar Regio Lower Tha    | 0 | 90  | N | Fail        |
| 691375 | M | Afar Regio Lower Tha    | 0 | 60  | N | Fail        |
| 691465 | M | Sidamo Re HE Qualific   | 0 | 120 | N | Fail        |
| 691563 | M | Somalia Re Lower Tha    | 0 | 120 | N | Withdrawn   |
| 691699 | M | South Regi Lower Tha    | 0 | 120 | N | Pass        |
| 691722 | M | Afar Regio HE Qualific  | 0 | 120 | N | Distinction |
| 691805 | M | Amhara Re Lower Tha     | 0 | 180 | N | Withdrawn   |
| 691873 | M | Somalia Re A Level or I | 0 | 120 | N | Pass        |
| 691932 | M | Amhara Re A Level or I  | 0 | 120 | N | Pass        |
| 692010 | F | Oromia Re A Level or I  | 0 | 120 | N | Pass        |
| 692097 | F | Somalia Re HE Qualific  | 0 | 120 | N | Pass        |
| 692189 | M | Amhara Re Lower Tha     | 0 | 60  | N | Withdrawn   |
| 692219 | M | South Regi A Level or I | 0 | 90  | N | Withdrawn   |
| 692220 | M | Amhara Re Lower Tha     | 0 | 60  | N | Pass        |



|        |   |                          |   |     |   |             |
|--------|---|--------------------------|---|-----|---|-------------|
| 692273 | M | Somalia Re A Level or I  | 0 | 120 | N | Withdrawn   |
| 692297 | M | South Regi Lower Tha     | 0 | 60  | Y | Fail        |
| 692301 | M | Afar Regio A Level or I  | 0 | 90  | N | Pass        |
| 692334 | M | South Wes A Level or I   | 0 | 60  | N | Pass        |
| 692454 | M | South Regi A Level or I  | 0 | 90  | N | Pass        |
| 692612 | M | Sidamo Re A Level or I   | 0 | 90  | N | Pass        |
| 692632 | M | South Regi A Level or I  | 0 | 60  | N | Fail        |
| 692740 | M | South Regi Lower Tha     | 0 | 60  | N | Withdrawn   |
| 692893 | M | Addis Abak Lower Tha     | 0 | 60  | N | Pass        |
| 692898 | M | South Wes A Level or I   | 0 | 60  | N | Withdrawn   |
| 692946 | M | Oromia Re Lower Tha      | 0 | 60  | N | Fail        |
| 692962 | M | South Regi HE Qualific   | 0 | 60  | N | Pass        |
| 692968 | M | Addis Abak A Level or I  | 0 | 60  | N | Pass        |
| 692976 | M | North Regi A Level or I  | 0 | 120 | N | Withdrawn   |
| 693114 | M | Addis Abak A Level or I  | 0 | 120 | N | Withdrawn   |
| 693160 | M | Sidamo Re Lower Tha      | 0 | 60  | N | Pass        |
| 693162 | M | Tigrai Regi A Level or I | 0 | 60  | N | Distinction |
| 693197 | M | Amhara Re A Level or I   | 0 | 120 | Y | Pass        |
| 693223 | M | South Regi Lower Tha     | 0 | 60  | N | Withdrawn   |
| 693236 | M | North Regi HE Qualific   | 0 | 120 | N | Pass        |
| 693246 | M | Sidamo Re Lower Tha      | 0 | 120 | N | Withdrawn   |
| 693345 | F | South Wes HE Qualific    | 0 | 150 | N | Pass        |
| 693373 | M | South Wes A Level or I   | 0 | 60  | N | Distinction |
| 693448 | M | North Regi Lower Tha     | 0 | 120 | N | Withdrawn   |
| 693497 | M | South Regi HE Qualific   | 0 | 60  | N | Pass        |
| 693519 | M | North Regi HE Qualific   | 0 | 90  | N | Pass        |
| 693573 | M | Sidamo Re Lower Tha      | 0 | 60  | N | Withdrawn   |
| 693628 | M | Addis Abak A Level or I  | 0 | 120 | N | Pass        |
| 693629 | M | Sidamo Re A Level or I   | 0 | 90  | N | Fail        |
| 693764 | M | North Regi Lower Tha     | 0 | 120 | N | Pass        |
| 693806 | F | Sidamo Re Lower Tha      | 0 | 180 | N | Distinction |
| 693812 | M | Sidamo Re No Formal      | 0 | 240 | N | Withdrawn   |
| 693873 | M | South Wes HE Qualific    | 0 | 180 | N | Fail        |
| 693903 | M | Oromia Re A Level or I   | 0 | 60  | N | Distinction |
| 693906 | M | Afar Regio A Level or I  | 0 | 60  | N | Withdrawn   |
| 693907 | F | Amhara Re Lower Tha      | 0 | 180 | N | Pass        |
| 694059 | F | Afar Regio HE Qualific   | 0 | 60  | N | Withdrawn   |
| 694128 | M | North Regi Lower Tha     | 0 | 90  | N | Pass        |
| 694144 | M | North Regi A Level or I  | 0 | 60  | N | Distinction |
| 694221 | M | Afar Regio Lower Tha     | 0 | 60  | N | Fail        |
| 694272 | M | Somalia Re Lower Tha     | 0 | 60  | N | Withdrawn   |
| 694284 | F | South Regi Lower Tha     | 0 | 120 | Y | Withdrawn   |
| 694376 | M | South Wes A Level or I   | 0 | 90  | N | Fail        |
| 694415 | F | South Regi A Level or I  | 0 | 120 | N | Withdrawn   |
| 694428 | M | Oromia Re A Level or I   | 0 | 60  | N | Pass        |
| 694456 | M | South Regi HE Qualific   | 0 | 60  | N | Pass        |
| 694464 | M | South Regi Lower Tha     | 0 | 120 | Y | Withdrawn   |

|        |   |                         |   |     |   |             |
|--------|---|-------------------------|---|-----|---|-------------|
| 694536 | M | Oromia Re A Level or I  | 0 | 120 | N | Withdrawn   |
| 694622 | M | Oromia Re A Level or I  | 0 | 60  | Y | Pass        |
| 694669 | M | Sidamo Re A Level or I  | 0 | 180 | Y | Withdrawn   |
| 694715 | M | Somalia Re A Level or I | 0 | 180 | N | Withdrawn   |
| 694716 | M | South Wes HE Qualific   | 0 | 90  | N | Pass        |
| 694827 | M | North Regi HE Qualific  | 0 | 60  | N | Pass        |
| 694836 | F | Somalia Re A Level or I | 0 | 60  | N | Pass        |
| 694848 | M | Somalia Re A Level or I | 0 | 120 | N | Distinction |
| 695090 | M | South Regi Lower Thar   | 0 | 120 | N | Pass        |
| 695169 | M | South Regi A Level or I | 0 | 120 | N | Pass        |
| 695220 | M | North Regi Lower Thar   | 0 | 180 | Y | Withdrawn   |
| 695250 | M | North Regi A Level or I | 0 | 120 | N | Withdrawn   |
| 695251 | M | South Wes HE Qualific   | 0 | 60  | N | Withdrawn   |
| 695369 | F | Amhara Re Lower Thar    | 0 | 120 | N | Withdrawn   |
| 695380 | M | Amhara Re Lower Thar    | 0 | 120 | N | Withdrawn   |
| 695416 | M | Oromia Re Lower Thar    | 0 | 240 | N | Withdrawn   |
| 695449 | M | North Regi HE Qualific  | 0 | 120 | N | Withdrawn   |
| 695471 | M | South Regi Lower Thar   | 0 | 60  | N | Pass        |
| 695485 | M | South Regi Lower Thar   | 0 | 60  | Y | Pass        |
| 695550 | M | Sidamo Re A Level or I  | 0 | 90  | N | Fail        |
| 695574 | F | Sidamo Re Lower Thar    | 0 | 120 | Y | Withdrawn   |
| 695637 | M | North Regi A Level or I | 0 | 120 | N | Distinction |
| 695676 | M | Sidamo Re Lower Thar    | 0 | 120 | N | Withdrawn   |
| 695700 | M | South Wes A Level or I  | 0 | 150 | N | Fail        |
| 695729 | M | Sidamo Re Lower Thar    | 0 | 60  | N | Pass        |
| 695748 | M | Sidamo Re A Level or I  | 0 | 120 | N | Withdrawn   |
| 695764 | M | Sidamo Re No Formal     | 0 | 210 | N | Withdrawn   |
| 695803 | M | South Regi HE Qualific  | 0 | 60  | N | Pass        |
| 695825 | M | North Regi Lower Thar   | 0 | 60  | N | Withdrawn   |
| 695869 | M | South Regi A Level or I | 0 | 60  | N | Pass        |
| 695879 | F | Addis Abat A Level or I | 0 | 120 | N | Withdrawn   |
| 695926 | M | South Wes Lower Thar    | 0 | 120 | N | Fail        |
| 695964 | M | Addis Abat Lower Thar   | 0 | 120 | N | Withdrawn   |
| 696039 | M | Amhara Re A Level or I  | 0 | 60  | N | Fail        |
| 696043 | F | Oromia Re Lower Thar    | 0 | 120 | Y | Distinction |
| 696071 | F | South Wes Lower Thar    | 0 | 90  | Y | Withdrawn   |
| 696082 | M | South Regi A Level or I | 0 | 60  | N | Pass        |
| 696091 | M | Somalia Re Lower Thar   | 0 | 60  | N | Withdrawn   |
| 696188 | M | North Regi Lower Thar   | 0 | 120 | N | Pass        |
| 696253 | M | South Wes Lower Thar    | 0 | 120 | Y | Withdrawn   |
| 696275 | M | South Wes Lower Thar    | 0 | 60  | N | Distinction |
| 696276 | M | South Wes HE Qualific   | 0 | 60  | N | Withdrawn   |
| 696318 | M | South Regi A Level or I | 0 | 90  | N | Distinction |
| 696329 | M | South Wes A Level or I  | 0 | 120 | N | Distinction |
| 696347 | F | Oromia Re Lower Thar    | 0 | 60  | N | Pass        |
| 696364 | M | South Wes A Level or I  | 0 | 60  | N | Pass        |
| 696410 | M | Sidamo Re Lower Thar    | 0 | 120 | N | Withdrawn   |

|        |   |                        |   |     |   |             |
|--------|---|------------------------|---|-----|---|-------------|
| 696456 | M | Afar Region A Level or | 0 | 60  | N | Fail        |
| 696583 | M | Oromia Re A Level or   | 0 | 60  | Y | Fail        |
| 696615 | M | South Regi A Level or  | 0 | 60  | N | Fail        |
| 696653 | M | Sidamo Re A Level or   | 0 | 90  | N | Fail        |
| 696659 | F | Amhara Re A Level or   | 0 | 120 | N | Pass        |
| 696662 | F | South Wes A Level or   | 0 | 120 | N | Distinction |
| 696664 | F | South Regi HE Qualific | 0 | 120 | N | Withdrawn   |
| 696666 | M | Amhara Re A Level or   | 0 | 120 | N | Fail        |
| 696671 | F | Sidamo Re A Level or   | 0 | 120 | N | Pass        |
| 696672 | M | Oromia Re A Level or   | 0 | 120 | N | Pass        |
| 696674 | M | Sidamo Re A Level or   | 0 | 120 | N | Pass        |
| 696678 | F | Amhara Re A Level or   | 0 | 120 | N | Pass        |
| 696729 | M | Amhara Re A Level or   | 0 | 60  | N | Pass        |
| 696943 | F | Amhara Re A Level or   | 0 | 120 | Y | Withdrawn   |
| 696981 | F | North Regi Lower Tha   | 0 | 60  | N | Withdrawn   |
| 696985 | M | South Wes Lower Tha    | 0 | 120 | N | Withdrawn   |
| 697027 | M | South Wes Lower Tha    | 0 | 120 | N | Fail        |
| 697042 | M | Amhara Re Lower Tha    | 0 | 180 | N | Withdrawn   |
| 697114 | M | South Regi A Level or  | 0 | 60  | N | Pass        |
| 697160 | M | South Regi Lower Tha   | 0 | 90  | N | Fail        |
| 697192 | M | Sidamo Re Lower Tha    | 0 | 150 | N | Withdrawn   |
| 697204 | M | Sidamo Re Lower Tha    | 0 | 60  | Y | Withdrawn   |
| 697215 | M | Sidamo Re Lower Tha    | 0 | 60  | N | Withdrawn   |
| 697255 | M | Afar Region Lower Tha  | 0 | 60  | N | Pass        |
| 697257 | M | Amhara Re A Level or   | 0 | 120 | N | Withdrawn   |
| 697299 | M | Addis Abat A Level or  | 0 | 60  | N | Withdrawn   |
| 697438 | M | Amhara Re Lower Tha    | 0 | 60  | Y | Withdrawn   |
| 697478 | M | South Regi Lower Tha   | 0 | 60  | Y | Pass        |
| 697529 | M | North Regi A Level or  | 0 | 60  | N | Withdrawn   |
| 697554 | M | Sidamo Re A Level or   | 0 | 240 | N | Withdrawn   |
| 697581 | M | South Wes Lower Tha    | 0 | 60  | N | Withdrawn   |
| 697665 | M | Amhara Re Lower Tha    | 0 | 90  | N | Withdrawn   |
| 697878 | M | South Regi Lower Tha   | 0 | 60  | N | Pass        |
| 697998 | M | Addis Abat Lower Tha   | 0 | 120 | N | Pass        |
| 698015 | M | Sidamo Re A Level or   | 0 | 60  | N | Pass        |
| 698020 | F | Sidamo Re Lower Tha    | 0 | 60  | N | Withdrawn   |
| 698112 | M | South Wes A Level or   | 0 | 120 | N | Withdrawn   |
| 698157 | M | Amhara Re A Level or   | 0 | 150 | Y | Fail        |
| 698193 | M | Amhara Re Lower Tha    | 0 | 90  | N | Fail        |
| 698233 | M | South Wes Lower Tha    | 0 | 150 | N | Withdrawn   |
| 698237 | F | Amhara Re HE Qualific  | 0 | 60  | N | Withdrawn   |
| 698278 | F | Somalia Re A Level or  | 0 | 150 | N | Withdrawn   |
| 698384 | M | Afar Region Lower Tha  | 0 | 60  | N | Pass        |
| 698407 | M | South Regi A Level or  | 0 | 60  | N | Fail        |
| 698485 | M | South Regi A Level or  | 0 | 90  | Y | Pass        |
| 698656 | F | Amhara Re A Level or   | 0 | 120 | N | Pass        |
| 698762 | F | Sidamo Re A Level or   | 0 | 120 | N | Withdrawn   |

|         |   |                         |   |     |   |             |
|---------|---|-------------------------|---|-----|---|-------------|
| 699126  | M | South Regi Lower Tha    | 0 | 90  | N | Pass        |
| 699127  | M | Sidamo Re Lower Tha     | 0 | 90  | N | Fail        |
| 699128  | M | Addis Abak A Level or I | 0 | 90  | N | Pass        |
| 836614  | M | South Regi HE Qualific  | 0 | 60  | N | Fail        |
| 884652  | M | Afar Regio A Level or I | 2 | 120 | Y | Withdrawn   |
| 895524  | M | South Regi HE Qualific  | 0 | 90  | N | Distinction |
| 900936  | M | Sidamo Re A Level or I  | 0 | 120 | N | Withdrawn   |
| 1021350 | M | Sidamo Re Lower Tha     | 0 | 90  | N | Fail        |
| 1042726 | M | Afar Regio A Level or I | 0 | 60  | N | Fail        |
| 1318759 | M | Afar Regio HE Qualific  | 0 | 60  | N | Pass        |
| 1348205 | M | Addis Abak HE Qualific  | 0 | 60  | N | Distinction |
| 1391717 | M | South Wes HE Qualific   | 0 | 60  | N | Pass        |
| 1409532 | M | South Regi A Level or I | 0 | 120 | N | Fail        |
| 1413902 | M | South Wes Lower Tha     | 0 | 120 | N | Fail        |
| 1424608 | M | South Regi A Level or I | 0 | 60  | N | Withdrawn   |
| 1448966 | M | South Wes HE Qualific   | 0 | 60  | N | Pass        |
| 1449171 | M | Afar Regio HE Qualific  | 0 | 60  | N | Withdrawn   |
| 1450604 | M | North Regi A Level or I | 1 | 90  | N | Pass        |
| 1459010 | M | North Regi Lower Tha    | 1 | 180 | N | Withdrawn   |
| 1473878 | M | Afar Regio HE Qualific  | 0 | 120 | Y | Pass        |
| 1477284 | M | Somalia Re Lower Tha    | 0 | 120 | N | Withdrawn   |
| 1501577 | M | South Wes A Level or I  | 0 | 120 | N | Distinction |
| 1514245 | M | Somalia Re Lower Tha    | 1 | 90  | N | Withdrawn   |
| 1532711 | M | Sidamo Re A Level or I  | 0 | 90  | Y | Withdrawn   |
| 1537796 | M | South Regi A Level or I | 0 | 60  | N | Withdrawn   |
| 1585671 | F | Sidamo Re Lower Tha     | 0 | 60  | N | Pass        |
| 1588621 | M | Amhara Re A Level or I  | 1 | 90  | N | Withdrawn   |
| 1603549 | M | Sidamo Re HE Qualific   | 0 | 60  | N | Pass        |
| 1629444 | F | Addis Abak A Level or I | 0 | 180 | Y | Withdrawn   |
| 1631797 | M | Somalia Re Lower Tha    | 0 | 60  | N | Pass        |
| 1639699 | M | South Wes Lower Tha     | 0 | 60  | N | Pass        |
| 1640680 | M | South Regi A Level or I | 0 | 60  | N | Pass        |
| 1658963 | M | Addis Abak A Level or I | 0 | 150 | N | Pass        |
| 1677677 | F | Sidamo Re Lower Tha     | 0 | 60  | N | Pass        |
| 1683192 | M | Oromia Re A Level or I  | 1 | 60  | Y | Withdrawn   |
| 1722493 | F | Afar Regio HE Qualific  | 0 | 60  | N | Fail        |
| 1733664 | F | Sidamo Re HE Qualific   | 0 | 60  | N | Fail        |
| 1745145 | M | Addis Abak Lower Tha    | 0 | 60  | Y | Withdrawn   |
| 1752994 | M | North Regi A Level or I | 0 | 60  | Y | Pass        |
| 1755594 | M | Oromia Re Post Gradu    | 0 | 190 | N | Distinction |
| 1765045 | F | South Regi A Level or I | 0 | 120 | N | Withdrawn   |
| 1766102 | M | Oromia Re A Level or I  | 0 | 120 | N | Fail        |
| 1771775 | M | Afar Regio HE Qualific  | 0 | 60  | N | Pass        |
| 1796402 | F | Afar Regio A Level or I | 0 | 60  | N | Pass        |
| 1810759 | M | North Regi HE Qualific  | 0 | 60  | N | Pass        |
| 1816458 | M | Addis Abak A Level or I | 0 | 90  | N | Pass        |
| 1817710 | M | Afar Regio Post Gradu   | 0 | 90  | N | Distinction |

|         |   |                          |   |     |   |             |
|---------|---|--------------------------|---|-----|---|-------------|
| 1818385 | F | Sidamo Re Lower Tha      | 1 | 120 | Y | Pass        |
| 1836241 | M | Afar Region A Level or I | 0 | 60  | N | Pass        |
| 1837138 | F | Somalia Re A Level or I  | 0 | 120 | N | Distinction |
| 1856869 | M | Amhara Re Lower Tha      | 0 | 60  | N | Fail        |
| 1866233 | M | Somalia Re A Level or I  | 1 | 60  | Y | Fail        |
| 1871598 | M | Afar Region Lower Tha    | 0 | 60  | N | Distinction |
| 1871684 | M | Tigray Region Lower Tha  | 2 | 90  | N | Pass        |
| 1873360 | M | Tigray Region Lower Tha  | 0 | 60  | N | Withdrawn   |
| 1877902 | M | Amhara Re A Level or I   | 0 | 60  | N | Pass        |
| 1879321 | M | South Wes HE Qualific    | 0 | 90  | N | Distinction |
| 1881231 | M | Somalia Re HE Qualific   | 0 | 90  | N | Pass        |
| 1887108 | F | South Regi HE Qualific   | 0 | 60  | N | Pass        |
| 1889752 | M | Addis Abat HE Qualific   | 0 | 90  | N | Pass        |
| 1895399 | M | South Regi HE Qualific   | 0 | 180 | N | Withdrawn   |
| 1929219 | M | South Regi HE Qualific   | 1 | 60  | N | Withdrawn   |
| 1944167 | M | North Regi Lower Tha     | 0 | 60  | N | Fail        |
| 1948159 | F | North Regi A Level or I  | 1 | 60  | N | Distinction |
| 1961652 | F | South Wes Lower Tha      | 1 | 90  | N | Fail        |
| 1962049 | M | South Regi A Level or I  | 0 | 90  | N | Pass        |
| 1962062 | M | Afar Region HE Qualific  | 1 | 120 | N | Fail        |
| 1972092 | M | Oromia Re Lower Tha      | 0 | 60  | N | Pass        |
| 1972368 | M | South Regi Lower Tha     | 0 | 60  | N | Withdrawn   |
| 1995177 | M | South Regi HE Qualific   | 0 | 120 | N | Distinction |
| 1998834 | M | South Regi A Level or I  | 0 | 80  | N | Pass        |
| 2017487 | M | Afar Region Lower Tha    | 0 | 60  | Y | Distinction |
| 2020628 | M | Afar Region A Level or I | 0 | 60  | Y | Pass        |
| 2026075 | M | Afar Region HE Qualific  | 0 | 90  | N | Withdrawn   |
| 2028523 | F | South Wes A Level or I   | 0 | 90  | N | Withdrawn   |
| 2029571 | M | Sidamo Re A Level or I   | 0 | 60  | N | Withdrawn   |
| 2035700 | F | South Wes Lower Tha      | 0 | 60  | N | Pass        |
| 2036893 | M | Afar Region Lower Tha    | 0 | 60  | Y | Withdrawn   |
| 2047575 | M | Afar Region Lower Tha    | 0 | 60  | N | Distinction |
| 2065972 | M | Somalia Re Lower Tha     | 0 | 60  | N | Pass        |
| 2067799 | F | Somalia Re Lower Tha     | 0 | 60  | Y | Fail        |
| 2071670 | M | Oromia Re Lower Tha      | 0 | 120 | N | Withdrawn   |
| 2081123 | M | South Regi A Level or I  | 0 | 60  | N | Pass        |
| 2088982 | M | South Regi A Level or I  | 2 | 60  | N | Withdrawn   |
| 2096251 | M | South Regi Lower Tha     | 0 | 60  | N | Pass        |
| 2103552 | M | Sidamo Re HE Qualific    | 0 | 60  | N | Withdrawn   |
| 2104819 | F | Tigray Region Lower Tha  | 0 | 60  | N | Withdrawn   |
| 2106955 | F | Oromia Re A Level or I   | 0 | 60  | N | Distinction |
| 2107747 | M | North Regi HE Qualific   | 0 | 60  | N | Withdrawn   |
| 2113446 | F | Addis Abat HE Qualific   | 0 | 60  | N | Withdrawn   |
| 2128283 | M | Oromia Re HE Qualific    | 1 | 60  | N | Pass        |
| 2137697 | F | Sidamo Re No Formal      | 0 | 120 | N | Withdrawn   |
| 2138970 | M | Afar Region HE Qualific  | 0 | 60  | N | Pass        |
| 2140300 | F | Amhara Re A Level or I   | 0 | 240 | N | Pass        |

|         |   |               |              |   |     |   |             |
|---------|---|---------------|--------------|---|-----|---|-------------|
| 2143312 | M | Afar Region   | A Level or I | 0 | 120 | N | Distinction |
| 2143440 | M | South West    | Lower Than   | 0 | 60  | N | Pass        |
| 2146013 | M | South Region  | Lower Than   | 0 | 210 | Y | Withdrawn   |
| 2154361 | M | Afar Region   | Lower Than   | 0 | 60  | N | Pass        |
| 2160316 | F | Sidamo Region | HE Qualific  | 0 | 60  | N | Distinction |
| 2161710 | M | Tigray Region | A Level or I | 3 | 60  | N | Fail        |
| 2178837 | M | Afar Region   | A Level or I | 0 | 60  | N | Pass        |
| 2180090 | M | Afar Region   | HE Qualific  | 0 | 180 | N | Distinction |
| 2182293 | M | Amhara Region | A Level or I | 0 | 120 | Y | Fail        |
| 2185729 | F | South West    | Lower Than   | 0 | 60  | N | Pass        |
| 2195853 | F | North Region  | A Level or I | 3 | 90  | N | Fail        |
| 2197766 | F | North Region  | Lower Than   | 0 | 210 | N | Distinction |
| 2198970 | M | Amhara Region | HE Qualific  | 0 | 150 | N | Withdrawn   |
| 2223401 | M | South Region  | A Level or I | 0 | 120 | N | Withdrawn   |
| 2254637 | M | South West    | Lower Than   | 0 | 60  | N | Pass        |
| 2256134 | F | Afar Region   | HE Qualific  | 0 | 60  | Y | Withdrawn   |
| 2268069 | M | South West    | HE Qualific  | 0 | 60  | N | Withdrawn   |
| 2272023 | F | Sidamo Region | Lower Than   | 0 | 60  | N | Withdrawn   |
| 2274542 | M | Sidamo Region | Lower Than   | 0 | 120 | N | Pass        |
| 2278101 | F | Sidamo Region | HE Qualific  | 0 | 60  | N | Pass        |
| 2282620 | M | South Region  | A Level or I | 0 | 60  | N | Fail        |
| 2283708 | M | North Region  | A Level or I | 0 | 90  | N | Withdrawn   |
| 2293511 | M | Sidamo Region | HE Qualific  | 0 | 60  | N | Distinction |
| 2298106 | M | South Region  | A Level or I | 0 | 60  | N | Distinction |
| 2298895 | M | Addis Ababa   | A Level or I | 2 | 60  | N | Distinction |
| 2301830 | M | Amhara Region | Lower Than   | 0 | 60  | N | Pass        |
| 2306410 | M | Oromia Region | Lower Than   | 0 | 90  | N | Pass        |
| 2316717 | M | South Region  | A Level or I | 0 | 60  | N | Withdrawn   |
| 2332934 | M | South West    | Lower Than   | 2 | 180 | N | Fail        |
| 2339267 | F | South Region  | A Level or I | 0 | 60  | N | Pass        |
| 2341420 | M | Oromia Region | A Level or I | 0 | 60  | N | Pass        |
| 2342045 | M | Amhara Region | A Level or I | 0 | 60  | Y | Withdrawn   |
| 2343785 | M | Addis Ababa   | Lower Than   | 0 | 120 | N | Pass        |
| 2351969 | M | Amhara Region | Lower Than   | 0 | 150 | N | Pass        |
| 2360559 | M | South West    | A Level or I | 0 | 90  | N | Pass        |
| 2366656 | F | Amhara Region | HE Qualific  | 0 | 60  | N | Distinction |
| 2371481 | F | South Region  | A Level or I | 0 | 150 | N | Withdrawn   |
| 2378208 | M | Addis Ababa   | HE Qualific  | 0 | 90  | N | Pass        |
| 2386732 | F | Tigray Region | Lower Than   | 0 | 120 | N | Distinction |
| 2395016 | F | South Region  | A Level or I | 0 | 60  | N | Withdrawn   |
| 2398260 | M | Sidamo Region | Lower Than   | 0 | 180 | N | Withdrawn   |
| 2399758 | M | South Region  | Lower Than   | 0 | 60  | N | Pass        |
| 2403701 | M | Oromia Region | HE Qualific  | 0 | 60  | N | Pass        |
| 2411981 | M | Tigray Region | A Level or I | 0 | 180 | N | Withdrawn   |
| 2417433 | M | Tigray Region | A Level or I | 3 | 60  | N | Fail        |
| 2417975 | F | Amhara Region | Lower Than   | 0 | 90  | N | Pass        |
| 2424257 | M | Sidamo Region | Lower Than   | 0 | 60  | N | Fail        |

|         |   |                          |   |     |   |             |
|---------|---|--------------------------|---|-----|---|-------------|
| 2427845 | M | Oromia Re HE Qualific    | 0 | 60  | N | Pass        |
| 2438784 | M | South Wes Lower Thar     | 0 | 120 | N | Pass        |
| 2449490 | M | Afar Region HE Qualific  | 0 | 120 | Y | Withdrawn   |
| 2457440 | M | South Regi A Level or I  | 0 | 60  | N | Pass        |
| 2459292 | M | South Wes Lower Thar     | 0 | 120 | N | Pass        |
| 2462281 | F | Sidamo Re A Level or I   | 1 | 60  | Y | Withdrawn   |
| 2463282 | M | South Wes Lower Thar     | 2 | 90  | Y | Withdrawn   |
| 2468232 | M | South Regi HE Qualific   | 2 | 210 | Y | Withdrawn   |
| 2470326 | M | Somalia Re A Level or I  | 0 | 120 | Y | Fail        |
| 2480886 | F | Addis Abat A Level or I  | 1 | 60  | Y | Fail        |
| 2482710 | F | Tigray Regi A Level or I | 0 | 60  | N | Pass        |
| 2486215 | M | Addis Abat A Level or I  | 0 | 180 | N | Withdrawn   |
| 2486930 | M | Somalia Re HE Qualific   | 0 | 90  | N | Pass        |
| 2497090 | M | North Regi A Level or I  | 0 | 120 | N | Withdrawn   |
| 2499307 | M | Addis Abat A Level or I  | 1 | 60  | N | Pass        |
| 2504129 | F | South Wes Lower Thar     | 0 | 120 | N | Fail        |
| 2505058 | M | South Regi A Level or I  | 0 | 60  | N | Fail        |
| 2509531 | M | Amhara Re A Level or I   | 0 | 120 | N | Withdrawn   |
| 2519138 | M | South Regi A Level or I  | 0 | 90  | N | Pass        |
| 2521574 | M | Somalia Re Lower Thar    | 0 | 150 | N | Withdrawn   |
| 2529052 | F | Somalia Re Lower Thar    | 0 | 90  | N | Fail        |
| 2529419 | M | South Regi Lower Thar    | 0 | 60  | N | Pass        |
| 2530976 | M | Somalia Re HE Qualific   | 0 | 90  | N | Pass        |
| 2535160 | F | Afar Region A Level or I | 0 | 60  | N | Fail        |
| 2537777 | M | South Regi Lower Thar    | 1 | 120 | Y | Fail        |
| 2540871 | M | Amhara Re Lower Thar     | 0 | 60  | N | Fail        |
| 2542209 | M | Sidamo Re Lower Thar     | 0 | 150 | N | Fail        |
| 2544643 | F | South Regi A Level or I  | 0 | 120 | N | Distinction |
| 2544766 | M | South Wes HE Qualific    | 0 | 60  | N | Pass        |
| 2546315 | F | North Regi A Level or I  | 0 | 150 | N | Distinction |
| 2550534 | M | Oromia Re A Level or I   | 0 | 60  | N | Withdrawn   |
| 2557008 | M | Sidamo Re A Level or I   | 0 | 60  | Y | Distinction |
| 2558365 | M | Amhara Re A Level or I   | 1 | 90  | N | Fail        |
| 2559144 | F | Sidamo Re A Level or I   | 0 | 120 | N | Pass        |
| 2563095 | M | South Regi HE Qualific   | 1 | 90  | N | Pass        |
| 2579891 | M | Amhara Re A Level or I   | 0 | 150 | N | Pass        |
| 2584244 | M | Afar Region HE Qualific  | 0 | 90  | N | Pass        |
| 2586748 | M | South Wes Lower Thar     | 1 | 60  | Y | Withdrawn   |
| 2597117 | M | Addis Abat A Level or I  | 0 | 60  | N | Distinction |
| 2599162 | M | Sidamo Re A Level or I   | 1 | 60  | N | Withdrawn   |
| 2599883 | F | Afar Region A Level or I | 0 | 240 | N | Pass        |
| 2602253 | M | Afar Region A Level or I | 0 | 60  | N | Withdrawn   |
| 2602542 | M | Afar Region Post Gradu   | 2 | 60  | N | Distinction |
| 2603027 | M | Oromia Re A Level or I   | 0 | 90  | N | Pass        |
| 2612102 | M | Oromia Re Lower Thar     | 0 | 60  | N | Distinction |
| 2612728 | M | South Regi Lower Thar    | 0 | 60  | N | Withdrawn   |
| 2613827 | M | Oromia Re Lower Thar     | 1 | 120 | N | Withdrawn   |

|         |   |                         |   |     |   |             |
|---------|---|-------------------------|---|-----|---|-------------|
| 2622634 | M | South Wes A Level or I  | 1 | 60  | N | Withdrawn   |
| 2624028 | M | Addis Abak Lower Tha    | 0 | 60  | N | Pass        |
| 2626417 | M | Sidamo Re Lower Tha     | 3 | 120 | N | Withdrawn   |
| 2630284 | F | Somalia Re A Level or I | 6 | 90  | N | Withdrawn   |
| 2641156 | M | Amhara Re A Level or I  | 0 | 120 | N | Pass        |
| 2642532 | M | Sidamo Re HE Qualific   | 3 | 120 | N | Pass        |
| 2643472 | M | Somalia Re HE Qualific  | 0 | 60  | N | Pass        |
| 2643829 | M | North Regi Lower Tha    | 0 | 60  | N | Fail        |
| 2649121 | M | Sidamo Re Lower Tha     | 0 | 180 | N | Withdrawn   |
| 2649948 | M | Somalia Re A Level or I | 0 | 60  | N | Fail        |
| 2652532 | F | Somalia Re Lower Tha    | 1 | 60  | N | Withdrawn   |
| 2657913 | M | Sidamo Re Lower Tha     | 2 | 60  | N | Pass        |
| 2658856 | M | Afar Regio HE Qualific  | 0 | 120 | N | Pass        |
| 2661012 | M | South Regi Lower Tha    | 0 | 120 | N | Withdrawn   |
| 2667478 | M | Amhara Re Lower Tha     | 1 | 60  | N | Fail        |
| 2678580 | M | Amhara Re A Level or I  | 0 | 60  | N | Withdrawn   |
| 2681198 | M | Addis Abak Lower Tha    | 0 | 90  | N | Pass        |
| 2682682 | F | Somalia Re A Level or I | 0 | 120 | Y | Distinction |
| 2682745 | F | Sidamo Re HE Qualific   | 0 | 120 | N | Withdrawn   |
| 2683857 | M | South Wes Lower Tha     | 1 | 90  | N | Pass        |
| 2684048 | F | Somalia Re Lower Tha    | 0 | 120 | N | Withdrawn   |
| 2686035 | F | Oromia Re Lower Tha     | 0 | 135 | N | Withdrawn   |
| 2687012 | M | Amhara Re Lower Tha     | 1 | 150 | N | Withdrawn   |
| 2693932 | M | South Regi A Level or I | 1 | 120 | N | Pass        |
| 2694139 | M | Addis Abak Lower Tha    | 0 | 60  | N | Withdrawn   |
| 2697921 | M | Addis Abak Lower Tha    | 1 | 60  | N | Pass        |
| 2702660 | F | Sidamo Re Lower Tha     | 0 | 240 | N | Withdrawn   |
| 24391   | M | Somalia Re A Level or I | 0 | 30  | N | Distinction |
| 26023   | M | Amhara Re Lower Tha     | 0 | 30  | N | Pass        |
| 32239   | F | Sidamo Re A Level or I  | 0 | 30  | N | Pass        |
| 35001   | F | Somalia Re Lower Tha    | 0 | 30  | N | Fail        |
| 60405   | F | Sidamo Re A Level or I  | 0 | 30  | N | Distinction |
| 62975   | M | South Regi Lower Tha    | 0 | 30  | N | Fail        |
| 67182   | F | South Regi A Level or I | 0 | 30  | N | Pass        |
| 75442   | F | Sidamo Re Lower Tha     | 0 | 30  | N | Fail        |
| 80448   | F | Somalia Re A Level or I | 0 | 30  | N | Withdrawn   |
| 82341   | F | Oromia Re Lower Tha     | 0 | 30  | Y | Distinction |
| 87929   | F | Sidamo Re A Level or I  | 0 | 30  | N | Pass        |
| 96117   | F | Sidamo Re A Level or I  | 0 | 30  | N | Pass        |
| 121056  | F | South Regi Lower Tha    | 0 | 30  | N | Withdrawn   |
| 122459  | F | Addis Abak Lower Tha    | 0 | 90  | N | Pass        |
| 122636  | F | Oromia Re Lower Tha     | 0 | 30  | N | Fail        |
| 122846  | F | Sidamo Re Lower Tha     | 0 | 30  | N | Pass        |
| 122928  | F | Addis Abak Lower Tha    | 0 | 30  | N | Fail        |
| 129212  | F | South Regi Lower Tha    | 0 | 30  | N | Distinction |
| 135331  | F | North Regi A Level or I | 0 | 30  | Y | Fail        |
| 138710  | M | Somalia Re A Level or I | 0 | 30  | N | Pass        |



|        |   |                         |   |     |   |             |
|--------|---|-------------------------|---|-----|---|-------------|
| 142990 | M | South Wes Lower Tha     | 0 | 30  | Y | Fail        |
| 155256 | M | Oromia Re A Level or I  | 0 | 30  | N | Distinction |
| 156127 | F | Amhara Re Lower Tha     | 0 | 30  | N | Fail        |
| 159484 | F | South Regi A Level or I | 0 | 30  | N | Fail        |
| 164922 | F | Addis Abak Lower Tha    | 0 | 30  | N | Pass        |
| 166183 | F | Addis Abak Lower Tha    | 0 | 30  | Y | Fail        |
| 189664 | F | South Regi Lower Tha    | 0 | 30  | Y | Pass        |
| 204745 | F | Amhara Re A Level or I  | 0 | 60  | N | Fail        |
| 233153 | F | Oromia Re Lower Tha     | 0 | 150 | N | Pass        |
| 236848 | F | South Regi A Level or I | 0 | 30  | N | Fail        |
| 239095 | F | Sidamo Re HE Qualific   | 0 | 30  | N | Pass        |
| 249965 | F | Amhara Re Lower Tha     | 0 | 30  | Y | Distinction |
| 253208 | F | North Regi A Level or I | 0 | 30  | N | Distinction |
| 253567 | M | South Regi Lower Tha    | 0 | 30  | N | Fail        |
| 261718 | F | Oromia Re Lower Tha     | 0 | 30  | N | Pass        |
| 266626 | F | Addis Abak Lower Tha    | 0 | 30  | N | Pass        |
| 268391 | F | South Regi No Formal    | 0 | 30  | N | Fail        |
| 276830 | F | Somalia Re Lower Tha    | 0 | 30  | N | Distinction |
| 279747 | F | South Regi Lower Tha    | 0 | 30  | N | Distinction |
| 281619 | F | Oromia Re A Level or I  | 0 | 30  | Y | Pass        |
| 285705 | F | South Regi A Level or I | 0 | 30  | N | Pass        |
| 286160 | F | North Regi A Level or I | 0 | 30  | N | Distinction |
| 286762 | F | North Regi Lower Tha    | 0 | 30  | N | Pass        |
| 290658 | F | Amhara Re Lower Tha     | 0 | 90  | N | Fail        |
| 292136 | F | Amhara Re Lower Tha     | 0 | 30  | N | Distinction |
| 296993 | F | Sidamo Re HE Qualific   | 0 | 30  | N | Pass        |
| 297990 | M | Amhara Re Lower Tha     | 0 | 30  | N | Distinction |
| 298186 | F | Somalia Re Lower Tha    | 0 | 45  | N | Pass        |
| 300508 | F | Somalia Re Lower Tha    | 0 | 30  | N | Pass        |
| 303165 | F | Sidamo Re Lower Tha     | 0 | 30  | N | Pass        |
| 306610 | F | Oromia Re Lower Tha     | 0 | 30  | N | Fail        |
| 308634 | M | Sidamo Re No Formal     | 0 | 30  | N | Fail        |
| 311158 | F | South Regi Lower Tha    | 0 | 30  | Y | Pass        |
| 313070 | M | Sidamo Re A Level or I  | 0 | 30  | N | Withdrawn   |
| 319331 | F | Sidamo Re Lower Tha     | 0 | 30  | N | Distinction |
| 324095 | F | Sidamo Re A Level or I  | 0 | 30  | N | Pass        |
| 325909 | F | South Regi Lower Tha    | 0 | 30  | N | Fail        |
| 330177 | M | Somalia Re Lower Tha    | 0 | 60  | Y | Pass        |
| 332715 | F | South Regi Lower Tha    | 0 | 30  | N | Distinction |
| 338446 | F | Sidamo Re Lower Tha     | 0 | 30  | N | Fail        |
| 339727 | F | South Regi Lower Tha    | 0 | 60  | N | Distinction |
| 339853 | F | South Wes Lower Tha     | 0 | 30  | Y | Pass        |
| 340486 | F | Somalia Re A Level or I | 0 | 60  | N | Distinction |
| 348579 | F | Amhara Re A Level or I  | 0 | 30  | Y | Pass        |
| 349360 | F | Sidamo Re A Level or I  | 0 | 30  | N | Pass        |
| 352382 | F | Sidamo Re A Level or I  | 0 | 30  | N | Pass        |
| 360683 | F | South Regi A Level or I | 0 | 30  | N | Pass        |

|        |   |                         |   |    |   |             |
|--------|---|-------------------------|---|----|---|-------------|
| 365192 | F | South Wes A Level or I  | 0 | 90 | N | Pass        |
| 368245 | F | Amhara Re A Level or I  | 0 | 30 | N | Fail        |
| 368969 | F | South Wes Lower Tha     | 0 | 30 | N | Pass        |
| 369378 | F | Addis Abak Lower Tha    | 0 | 30 | N | Withdrawn   |
| 372691 | F | Somalia Re Lower Tha    | 0 | 30 | N | Pass        |
| 375600 | F | Sidamo Re, Lower Tha    | 0 | 30 | N | Pass        |
| 375882 | F | Sidamo Re, Lower Tha    | 0 | 60 | N | Fail        |
| 379113 | F | Sidamo Re, A Level or I | 0 | 30 | N | Fail        |
| 379844 | M | Oromia Re Lower Tha     | 0 | 30 | N | Pass        |
| 383420 | M | North Regi A Level or I | 0 | 60 | Y | Withdrawn   |
| 387550 | F | Sidamo Re, Lower Tha    | 0 | 30 | N | Fail        |
| 392215 | F | South Regi Lower Tha    | 0 | 30 | N | Pass        |
| 393451 | F | Addis Abak Lower Tha    | 0 | 30 | N | Fail        |
| 395954 | F | Addis Abak Lower Tha    | 0 | 30 | N | Fail        |
| 396145 | F | Amhara Re Lower Tha     | 0 | 30 | N | Pass        |
| 401139 | F | Addis Abak Lower Tha    | 0 | 30 | N | Pass        |
| 404325 | F | Sidamo Re, A Level or I | 0 | 30 | N | Fail        |
| 410573 | F | Somalia Re Lower Tha    | 0 | 30 | N | Fail        |
| 411105 | F | South Regi A Level or I | 0 | 30 | N | Pass        |
| 416355 | F | Sidamo Re, A Level or I | 0 | 30 | N | Pass        |
| 417220 | F | Sidamo Re, A Level or I | 0 | 30 | Y | Fail        |
| 418032 | F | South Regi A Level or I | 0 | 30 | N | Distinction |
| 421999 | F | South Regi Lower Tha    | 0 | 90 | N | Fail        |
| 426736 | F | Addis Abak Lower Tha    | 0 | 30 | N | Fail        |
| 427321 | F | Amhara Re HE Qualific   | 0 | 30 | N | Fail        |
| 428301 | M | Amhara Re A Level or I  | 0 | 30 | N | Distinction |
| 433165 | F | South Regi A Level or I | 0 | 30 | N | Pass        |
| 434478 | F | Addis Abak Lower Tha    | 0 | 30 | N | Withdrawn   |
| 439677 | F | Amhara Re Lower Tha     | 0 | 30 | N | Distinction |
| 444943 | F | Addis Abak A Level or I | 0 | 30 | N | Distinction |
| 445086 | F | Amhara Re A Level or I  | 0 | 30 | N | Pass        |
| 465724 | F | Somalia Re A Level or I | 0 | 30 | N | Fail        |
| 466900 | F | Addis Abak Lower Tha    | 0 | 30 | N | Distinction |
| 470340 | F | South Regi A Level or I | 0 | 30 | N | Pass        |
| 472911 | F | South Regi A Level or I | 0 | 30 | Y | Pass        |
| 473271 | F | Oromia Re A Level or I  | 0 | 45 | N | Pass        |
| 473924 | F | Sidamo Re, A Level or I | 0 | 30 | N | Distinction |
| 474067 | F | Oromia Re Lower Tha     | 0 | 30 | Y | Pass        |
| 474272 | M | Amhara Re Lower Tha     | 0 | 45 | Y | Fail        |
| 476921 | M | Amhara Re Lower Tha     | 0 | 60 | Y | Fail        |
| 477165 | F | Sidamo Re, Lower Tha    | 0 | 30 | N | Fail        |
| 477468 | F | South Regi Lower Tha    | 0 | 30 | N | Pass        |
| 477650 | F | Sidamo Re, Lower Tha    | 0 | 30 | N | Pass        |
| 478556 | F | South Regi Lower Tha    | 0 | 30 | Y | Distinction |
| 478784 | F | South Regi A Level or I | 0 | 30 | Y | Distinction |
| 479442 | F | Addis Abak A Level or I | 0 | 30 | N | Pass        |
| 479595 | F | Addis Abak Lower Tha    | 0 | 30 | N | Withdrawn   |

|        |   |                         |   |    |   |             |
|--------|---|-------------------------|---|----|---|-------------|
| 480959 | F | Sidamo Re Lower Tha     | 0 | 30 | N | Pass        |
| 481404 | M | Amhara Re Lower Tha     | 0 | 30 | Y | Pass        |
| 481772 | F | Sidamo Re Lower Tha     | 0 | 90 | N | Fail        |
| 483123 | M | South Wes Lower Tha     | 0 | 30 | N | Fail        |
| 483158 | F | South Regi A Level or I | 0 | 30 | N | Fail        |
| 483959 | F | South Regi A Level or I | 0 | 90 | N | Pass        |
| 488853 | M | Sidamo Re Lower Tha     | 0 | 30 | N | Fail        |
| 489222 | F | Addis Abak Lower Tha    | 0 | 30 | N | Pass        |
| 489624 | F | Somalia Re A Level or I | 0 | 30 | N | Distinction |
| 493763 | F | South Regi A Level or I | 0 | 30 | N | Pass        |
| 494212 | F | South Regi Lower Tha    | 0 | 30 | N | Pass        |
| 494291 | F | South Regi A Level or I | 0 | 30 | Y | Fail        |
| 495276 | M | Oromia Re Lower Tha     | 0 | 30 | N | Pass        |
| 496224 | F | Sidamo Re No Formal     | 0 | 90 | N | Fail        |
| 497074 | F | Somalia Re Lower Tha    | 0 | 30 | N | Pass        |
| 497190 | F | Sidamo Re A Level or I  | 0 | 30 | N | Pass        |
| 497278 | F | Somalia Re A Level or I | 0 | 30 | Y | Pass        |
| 498702 | F | Somalia Re A Level or I | 0 | 30 | N | Fail        |
| 499006 | F | Sidamo Re Lower Tha     | 0 | 30 | N | Pass        |
| 499446 | F | Sidamo Re A Level or I  | 0 | 30 | Y | Pass        |
| 500112 | F | South Regi A Level or I | 0 | 30 | N | Pass        |
| 500720 | F | South Regi HE Qualific  | 0 | 60 | N | Pass        |
| 503663 | F | Somalia Re Lower Tha    | 0 | 30 | Y | Distinction |
| 505503 | F | Oromia Re Lower Tha     | 0 | 30 | N | Fail        |
| 505754 | F | Sidamo Re Lower Tha     | 0 | 30 | N | Fail        |
| 506679 | F | Sidamo Re Lower Tha     | 0 | 30 | N | Pass        |
| 509034 | F | Sidamo Re A Level or I  | 0 | 30 | N | Pass        |
| 509277 | F | Addis Abak A Level or I | 0 | 30 | N | Pass        |
| 510533 | M | Sidamo Re A Level or I  | 0 | 30 | N | Pass        |
| 510737 | F | Sidamo Re A Level or I  | 0 | 30 | N | Fail        |
| 511571 | F | Amhara Re A Level or I  | 0 | 30 | N | Pass        |
| 512258 | F | Addis Abak A Level or I | 0 | 30 | N | Pass        |
| 514699 | M | Addis Abak Lower Tha    | 0 | 30 | N | Fail        |
| 515496 | M | South Wes Lower Tha     | 0 | 30 | N | Pass        |
| 516434 | F | Addis Abak A Level or I | 0 | 30 | N | Pass        |
| 519091 | F | South Regi Lower Tha    | 0 | 30 | N | Distinction |
| 519185 | M | South Regi Lower Tha    | 0 | 30 | N | Fail        |
| 521164 | F | South Wes Lower Tha     | 0 | 30 | Y | Distinction |
| 522561 | F | Addis Abak A Level or I | 0 | 30 | N | Distinction |
| 522731 | F | Sidamo Re Lower Tha     | 0 | 30 | N | Pass        |
| 523419 | F | Somalia Re A Level or I | 0 | 30 | N | Fail        |
| 523803 | F | Sidamo Re Lower Tha     | 0 | 90 | Y | Pass        |
| 527742 | F | Amhara Re Lower Tha     | 0 | 60 | N | Distinction |
| 528515 | F | South Wes Lower Tha     | 0 | 30 | N | Withdrawn   |
| 530826 | M | Sidamo Re Lower Tha     | 0 | 90 | N | Fail        |
| 531224 | F | Oromia Re Lower Tha     | 0 | 30 | N | Pass        |
| 534251 | F | South Regi A Level or I | 0 | 30 | N | Fail        |

|        |   |                          |   |     |   |             |
|--------|---|--------------------------|---|-----|---|-------------|
| 534647 | M | Sidamo Re, Lower Tha     | 0 | 30  | N | Fail        |
| 536647 | F | Addis Abak A Level or I  | 0 | 30  | N | Distinction |
| 537181 | F | South Regi A Level or I  | 0 | 30  | N | Pass        |
| 537662 | M | South Regi A Level or I  | 0 | 30  | N | Pass        |
| 537670 | F | Amhara Re Lower Tha      | 0 | 150 | Y | Fail        |
| 539436 | F | South Wes A Level or I   | 0 | 30  | N | Distinction |
| 541252 | F | South Wes Lower Tha      | 0 | 150 | N | Pass        |
| 543557 | M | Sidamo Re, Lower Tha     | 0 | 30  | N | Withdrawn   |
| 544615 | F | Oromia Re A Level or I   | 0 | 30  | N | Pass        |
| 544898 | F | Oromia Re Lower Tha      | 0 | 30  | N | Fail        |
| 545313 | F | Oromia Re Lower Tha      | 0 | 30  | Y | Fail        |
| 545785 | F | Sidamo Re, A Level or I  | 0 | 30  | N | Pass        |
| 546097 | F | South Regi Lower Tha     | 0 | 30  | N | Pass        |
| 546192 | M | Oromia Re Lower Tha      | 0 | 30  | N | Pass        |
| 546457 | F | Sidamo Re, A Level or I  | 0 | 30  | N | Pass        |
| 546754 | F | Oromia Re A Level or I   | 0 | 30  | N | Fail        |
| 547440 | M | Amhara Re Lower Tha      | 0 | 30  | N | Withdrawn   |
| 548190 | F | Addis Abak Lower Tha     | 0 | 30  | N | Fail        |
| 548388 | F | South Regi A Level or I  | 0 | 30  | N | Pass        |
| 549887 | F | Sidamo Re, A Level or I  | 0 | 30  | N | Distinction |
| 549909 | M | Addis Abak HE Qualific   | 0 | 90  | N | Distinction |
| 549973 | M | Oromia Re Lower Tha      | 0 | 30  | N | Fail        |
| 551389 | F | South Regi Lower Tha     | 0 | 30  | N | Pass        |
| 551545 | M | South Wes Lower Tha      | 0 | 30  | N | Fail        |
| 552750 | F | Sidamo Re, A Level or I  | 0 | 60  | N | Pass        |
| 553643 | F | South Regi Lower Tha     | 0 | 30  | N | Distinction |
| 554967 | F | Amhara Re A Level or I   | 0 | 45  | N | Pass        |
| 556509 | F | Oromia Re Lower Tha      | 0 | 90  | N | Fail        |
| 556520 | F | Amhara Re Lower Tha      | 0 | 30  | Y | Distinction |
| 556523 | F | Afar Regioi A Level or I | 0 | 30  | N | Pass        |
| 557031 | F | South Regi Lower Tha     | 0 | 30  | N | Fail        |
| 557085 | F | Sidamo Re, Lower Tha     | 0 | 30  | N | Pass        |
| 559919 | F | Addis Abak Lower Tha     | 0 | 30  | N | Distinction |
| 560328 | F | South Wes Lower Tha      | 0 | 30  | Y | Pass        |
| 560374 | F | South Wes Lower Tha      | 0 | 45  | N | Pass        |
| 560653 | M | Sidamo Re, Lower Tha     | 0 | 45  | N | Pass        |
| 561148 | F | Addis Abak Lower Tha     | 0 | 30  | N | Pass        |
| 561163 | F | Amhara Re A Level or I   | 0 | 45  | N | Pass        |
| 561884 | F | Oromia Re A Level or I   | 0 | 75  | N | Pass        |
| 562696 | F | South Wes A Level or I   | 0 | 60  | Y | Distinction |
| 562913 | F | South Regi Lower Tha     | 0 | 30  | N | Pass        |
| 563612 | F | Somalia Re Lower Tha     | 0 | 30  | N | Fail        |
| 564190 | F | Addis Abak Lower Tha     | 0 | 60  | Y | Withdrawn   |
| 564609 | F | South Wes A Level or I   | 0 | 30  | Y | Pass        |
| 565002 | F | Addis Abak Lower Tha     | 0 | 30  | N | Pass        |
| 565222 | F | Amhara Re Lower Tha      | 0 | 30  | N | Distinction |
| 565525 | F | Sidamo Re, A Level or I  | 0 | 30  | N | Fail        |

|        |   |                         |   |    |   |             |
|--------|---|-------------------------|---|----|---|-------------|
| 565640 | F | South Regi Lower Tha    | 0 | 30 | N | Pass        |
| 565892 | F | South Wes Lower Tha     | 0 | 30 | N | Pass        |
| 565993 | F | Addis Abak Lower Tha    | 0 | 30 | N | Pass        |
| 566153 | F | Sidamo Re Lower Tha     | 0 | 30 | N | Withdrawn   |
| 566183 | F | Sidamo Re A Level or I  | 0 | 45 | N | Pass        |
| 566603 | F | South Regi A Level or I | 0 | 45 | N | Withdrawn   |
| 566923 | F | South Wes HE Qualific   | 0 | 30 | N | Fail        |
| 566963 | F | Sidamo Re A Level or I  | 0 | 30 | Y | Pass        |
| 567009 | M | Addis Abak Lower Tha    | 0 | 45 | Y | Pass        |
| 567211 | F | Somalia Re A Level or I | 0 | 30 | N | Distinction |
| 567325 | F | South Regi Lower Tha    | 0 | 30 | N | Pass        |
| 567831 | F | Sidamo Re No Formal     | 0 | 30 | N | Fail        |
| 567987 | F | Sidamo Re Lower Tha     | 0 | 90 | N | Fail        |
| 568118 | F | Amhara Re Lower Tha     | 0 | 30 | Y | Fail        |
| 568288 | F | South Wes A Level or I  | 0 | 45 | Y | Distinction |
| 568539 | F | South Regi A Level or I | 0 | 30 | Y | Pass        |
| 568973 | F | Addis Abak Lower Tha    | 0 | 30 | Y | Fail        |
| 569253 | F | Somalia Re HE Qualific  | 0 | 30 | N | Distinction |
| 569381 | M | Addis Abak Lower Tha    | 0 | 60 | N | Withdrawn   |
| 569490 | F | Sidamo Re Lower Tha     | 0 | 30 | N | Pass        |
| 569511 | F | Somalia Re Lower Tha    | 0 | 45 | N | Pass        |
| 569595 | F | South Regi Lower Tha    | 0 | 30 | Y | Fail        |
| 569679 | M | South Wes A Level or I  | 0 | 30 | N | Pass        |
| 569974 | F | Addis Abak A Level or I | 0 | 30 | Y | Pass        |
| 569984 | F | Sidamo Re Lower Tha     | 0 | 30 | N | Fail        |
| 570141 | F | Addis Abak A Level or I | 0 | 30 | N | Pass        |
| 570529 | M | South Wes Lower Tha     | 0 | 30 | N | Pass        |
| 570801 | F | Addis Abak A Level or I | 0 | 45 | N | Pass        |
| 571334 | F | South Regi Lower Tha    | 0 | 30 | N | Pass        |
| 571359 | F | Amhara Re Lower Tha     | 0 | 30 | N | Fail        |
| 571380 | F | Addis Abak Lower Tha    | 0 | 30 | N | Pass        |
| 571458 | M | Somalia Re Lower Tha    | 0 | 45 | N | Distinction |
| 571577 | F | South Wes Lower Tha     | 0 | 30 | N | Pass        |
| 571696 | F | South Regi A Level or I | 0 | 30 | N | Pass        |
| 571768 | F | Somalia Re A Level or I | 0 | 30 | N | Fail        |
| 571787 | F | Amhara Re A Level or I  | 0 | 90 | N | Fail        |
| 571883 | F | South Regi Lower Tha    | 0 | 30 | N | Distinction |
| 571896 | F | Amhara Re Lower Tha     | 0 | 30 | N | Fail        |
| 571952 | F | Somalia Re Lower Tha    | 0 | 30 | N | Fail        |
| 572335 | F | Addis Abak Lower Tha    | 0 | 30 | N | Fail        |
| 572388 | F | South Regi Lower Tha    | 0 | 30 | N | Pass        |
| 572663 | F | Oromia Re Lower Tha     | 0 | 30 | N | Pass        |
| 572714 | F | Somalia Re Lower Tha    | 0 | 30 | N | Pass        |
| 573134 | F | Sidamo Re Lower Tha     | 0 | 30 | N | Pass        |
| 573294 | F | Sidamo Re Lower Tha     | 0 | 30 | N | Fail        |
| 573331 | F | South Regi A Level or I | 0 | 30 | N | Pass        |
| 573460 | F | Addis Abak HE Qualific  | 0 | 30 | N | Fail        |

|        |   |                         |   |     |   |             |
|--------|---|-------------------------|---|-----|---|-------------|
| 573464 | F | South Wes Lower Tha     | 0 | 30  | N | Pass        |
| 573510 | M | South Wes Lower Tha     | 0 | 30  | N | Fail        |
| 573554 | F | Oromia Re Lower Tha     | 0 | 30  | N | Pass        |
| 573666 | F | Sidamo Re A Level or I  | 0 | 30  | N | Pass        |
| 574238 | F | South Regi Lower Tha    | 0 | 30  | N | Pass        |
| 574351 | F | Oromia Re Lower Tha     | 0 | 30  | N | Fail        |
| 574504 | F | Sidamo Re Lower Tha     | 0 | 30  | N | Fail        |
| 574512 | F | South Regi A Level or I | 0 | 30  | N | Distinction |
| 574606 | F | Sidamo Re Lower Tha     | 0 | 30  | N | Withdrawn   |
| 574642 | F | South Regi A Level or I | 0 | 30  | N | Withdrawn   |
| 574857 | F | South Regi Lower Tha    | 0 | 60  | N | Pass        |
| 574948 | F | South Wes Lower Tha     | 0 | 30  | N | Pass        |
| 574957 | F | Oromia Re Lower Tha     | 0 | 30  | N | Fail        |
| 574960 | M | South Wes A Level or I  | 0 | 30  | N | Distinction |
| 574988 | F | Oromia Re A Level or I  | 0 | 30  | Y | Pass        |
| 575000 | F | South Regi Lower Tha    | 0 | 30  | Y | Fail        |
| 575061 | F | South Regi Lower Tha    | 0 | 150 | N | Pass        |
| 575080 | F | Somalia Re Lower Tha    | 0 | 30  | N | Withdrawn   |
| 575136 | F | South Regi Lower Tha    | 0 | 30  | N | Fail        |
| 575214 | F | Amhara Re Lower Tha     | 0 | 30  | N | Pass        |
| 575355 | F | Sidamo Re Lower Tha     | 0 | 30  | N | Pass        |
| 575454 | F | South Regi Lower Tha    | 0 | 30  | Y | Fail        |
| 575488 | F | Sidamo Re Lower Tha     | 0 | 30  | N | Distinction |
| 575554 | F | Oromia Re A Level or I  | 0 | 30  | N | Pass        |
| 575559 | F | Sidamo Re A Level or I  | 0 | 30  | N | Distinction |
| 575691 | F | Somalia Re Lower Tha    | 0 | 30  | N | Fail        |
| 575720 | F | South Wes Lower Tha     | 0 | 30  | N | Distinction |
| 575984 | F | South Regi A Level or I | 0 | 30  | N | Pass        |
| 576141 | F | Sidamo Re A Level or I  | 0 | 30  | N | Fail        |
| 576143 | F | South Regi Lower Tha    | 0 | 30  | N | Pass        |
| 576371 | M | Somalia Re Lower Tha    | 0 | 60  | Y | Fail        |
| 576425 | M | Amhara Re Lower Tha     | 0 | 30  | N | Pass        |
| 576445 | F | Somalia Re Lower Tha    | 0 | 30  | Y | Pass        |
| 576447 | F | South Wes Lower Tha     | 0 | 30  | N | Fail        |
| 576455 | F | Sidamo Re A Level or I  | 0 | 30  | N | Fail        |
| 576488 | F | Sidamo Re Lower Tha     | 0 | 30  | N | Pass        |
| 576593 | F | Sidamo Re A Level or I  | 0 | 30  | N | Fail        |
| 576654 | F | Amhara Re A Level or I  | 0 | 30  | N | Pass        |
| 576761 | F | Sidamo Re A Level or I  | 0 | 30  | N | Pass        |
| 576948 | F | South Regi Lower Tha    | 0 | 30  | N | Pass        |
| 577439 | F | Sidamo Re Lower Tha     | 0 | 30  | N | Fail        |
| 577456 | F | South Regi Lower Tha    | 0 | 30  | N | Fail        |
| 577471 | F | Sidamo Re A Level or I  | 0 | 30  | N | Withdrawn   |
| 577780 | F | Amhara Re Lower Tha     | 0 | 30  | N | Pass        |
| 577820 | F | Addis Abak Lower Tha    | 0 | 30  | N | Pass        |
| 577827 | F | South Wes Lower Tha     | 0 | 90  | Y | Fail        |
| 577888 | F | South Regi A Level or I | 0 | 30  | N | Distinction |

|        |   |                       |   |     |   |             |
|--------|---|-----------------------|---|-----|---|-------------|
| 578140 | F | Sidamo Re Lower Than  | 0 | 30  | N | Pass        |
| 578207 | M | South Wes A Level or  | 0 | 30  | N | Distinction |
| 578375 | F | Oromia Re Lower Than  | 0 | 30  | N | Pass        |
| 578378 | F | Sidamo Re Lower Than  | 0 | 30  | N | Withdrawn   |
| 578555 | M | Sidamo Re Lower Than  | 0 | 30  | N | Fail        |
| 578666 | F | South Regi A Level or | 0 | 30  | N | Fail        |
| 578781 | F | Amhara Re Lower Than  | 0 | 30  | Y | Fail        |
| 578940 | F | Somalia Re A Level or | 0 | 30  | Y | Pass        |
| 578941 | F | Addis Abak Lower Than | 0 | 30  | N | Fail        |
| 578977 | F | Sidamo Re Lower Than  | 0 | 30  | N | Fail        |
| 579015 | F | Amhara Re A Level or  | 0 | 30  | Y | Pass        |
| 579020 | F | Sidamo Re A Level or  | 0 | 30  | N | Pass        |
| 579086 | F | Sidamo Re A Level or  | 0 | 90  | N | Pass        |
| 579164 | F | South Regi Lower Than | 0 | 30  | N | Pass        |
| 579201 | F | Sidamo Re A Level or  | 0 | 30  | N | Pass        |
| 579203 | F | Sidamo Re A Level or  | 0 | 30  | N | Pass        |
| 579309 | F | South Regi No Formal  | 0 | 30  | N | Fail        |
| 579381 | F | Amhara Re Lower Than  | 0 | 30  | N | Distinction |
| 579528 | F | Somalia Re Lower Than | 0 | 30  | N | Pass        |
| 579572 | F | Addis Abak Lower Than | 0 | 30  | N | Pass        |
| 579661 | F | South Regi Lower Than | 0 | 30  | N | Pass        |
| 580095 | F | Addis Abak Lower Than | 0 | 30  | N | Fail        |
| 580469 | F | Oromia Re Lower Than  | 0 | 30  | N | Fail        |
| 580669 | F | Addis Abak Lower Than | 0 | 30  | N | Fail        |
| 580860 | F | South Wes A Level or  | 0 | 30  | N | Distinction |
| 580870 | M | South Regi Lower Than | 0 | 30  | N | Pass        |
| 580925 | F | Amhara Re Lower Than  | 0 | 30  | N | Fail        |
| 581003 | M | Amhara Re HE Qualific | 0 | 30  | N | Fail        |
| 581062 | F | Oromia Re A Level or  | 0 | 30  | N | Distinction |
| 581063 | F | Addis Abak A Level or | 0 | 30  | N | Distinction |
| 581118 | F | Addis Abak A Level or | 0 | 30  | N | Distinction |
| 581178 | F | Amhara Re Lower Than  | 0 | 30  | N | Pass        |
| 581200 | F | South Wes A Level or  | 0 | 30  | N | Pass        |
| 581239 | F | Addis Abak A Level or | 0 | 60  | N | Pass        |
| 581414 | F | South Wes Lower Than  | 0 | 30  | Y | Pass        |
| 581485 | F | Amhara Re A Level or  | 0 | 30  | N | Pass        |
| 581510 | F | North Regi Lower Than | 0 | 30  | N | Fail        |
| 581606 | F | South Regi A Level or | 0 | 60  | N | Withdrawn   |
| 581652 | F | Addis Abak A Level or | 0 | 30  | Y | Distinction |
| 581806 | F | South Regi Lower Than | 0 | 30  | N | Pass        |
| 581889 | F | Addis Abak A Level or | 0 | 30  | N | Fail        |
| 581956 | F | Addis Abak Lower Than | 0 | 30  | N | Distinction |
| 581965 | F | Addis Abak Lower Than | 0 | 30  | N | Distinction |
| 582005 | M | Amhara Re Lower Than  | 0 | 150 | Y | Withdrawn   |
| 582039 | F | Oromia Re Lower Than  | 0 | 30  | N | Fail        |
| 582226 | F | North Regi A Level or | 0 | 30  | N | Pass        |
| 582250 | F | Sidamo Re A Level or  | 0 | 30  | N | Distinction |

|        |   |                         |   |     |   |             |
|--------|---|-------------------------|---|-----|---|-------------|
| 582309 | M | South Regi Lower Thar   | 0 | 40  | N | Withdrawn   |
| 582420 | F | Somalia Re A Level or I | 0 | 30  | N | Pass        |
| 582460 | F | Addis Abak A Level or I | 0 | 30  | Y | Pass        |
| 582486 | F | Addis Abak A Level or I | 0 | 30  | N | Fail        |
| 582536 | F | Amhara Re Lower Thar    | 0 | 30  | N | Distinction |
| 582568 | F | Somalia Re A Level or I | 0 | 30  | N | Fail        |
| 582649 | F | South Regi Lower Thar   | 0 | 30  | N | Fail        |
| 582697 | F | Sidamo Re HE Qualific   | 0 | 30  | N | Pass        |
| 582709 | F | Addis Abak Lower Thar   | 0 | 30  | N | Distinction |
| 582710 | F | Sidamo Re Lower Thar    | 0 | 30  | N | Fail        |
| 583031 | F | South Regi Lower Thar   | 0 | 30  | Y | Pass        |
| 583146 | F | Addis Abak Lower Thar   | 0 | 30  | N | Pass        |
| 583423 | F | South Regi Lower Thar   | 0 | 30  | N | Pass        |
| 583502 | F | Somalia Re Lower Thar   | 0 | 30  | N | Fail        |
| 583532 | F | Amhara Re Lower Thar    | 0 | 30  | N | Pass        |
| 583607 | F | North Regi A Level or I | 0 | 30  | N | Pass        |
| 583623 | F | South Wes A Level or I  | 0 | 30  | N | Distinction |
| 583625 | F | Somalia Re Lower Thar   | 0 | 30  | N | Pass        |
| 583664 | F | South Regi Lower Thar   | 0 | 30  | N | Distinction |
| 583721 | F | Addis Abak Lower Thar   | 0 | 30  | N | Pass        |
| 583730 | F | Somalia Re A Level or I | 0 | 60  | N | Fail        |
| 583827 | F | South Wes Lower Thar    | 0 | 30  | N | Fail        |
| 583973 | F | Sidamo Re A Level or I  | 0 | 30  | N | Pass        |
| 584143 | M | Addis Abak Lower Thar   | 0 | 60  | N | Distinction |
| 584195 | M | North Regi Lower Thar   | 0 | 30  | N | Pass        |
| 584299 | F | Addis Abak Lower Thar   | 0 | 30  | N | Pass        |
| 584442 | F | South Regi No Formal    | 0 | 30  | N | Fail        |
| 584448 | F | Addis Abak No Formal    | 0 | 30  | N | Pass        |
| 584500 | F | South Wes A Level or I  | 0 | 30  | N | Pass        |
| 584509 | F | Somalia Re A Level or I | 0 | 30  | N | Distinction |
| 584512 | F | South Regi A Level or I | 0 | 30  | N | Fail        |
| 584710 | F | Oromia Re A Level or I  | 0 | 30  | N | Pass        |
| 584712 | M | Amhara Re A Level or I  | 0 | 30  | Y | Fail        |
| 584733 | F | South Wes Lower Thar    | 0 | 30  | N | Pass        |
| 584827 | F | Sidamo Re Lower Thar    | 0 | 30  | N | Pass        |
| 584836 | F | Sidamo Re HE Qualific   | 0 | 30  | N | Withdrawn   |
| 584844 | F | South Regi A Level or I | 0 | 30  | N | Fail        |
| 584850 | F | Addis Abak Lower Thar   | 0 | 30  | N | Fail        |
| 584908 | F | Sidamo Re A Level or I  | 0 | 150 | N | Pass        |
| 584942 | F | Oromia Re A Level or I  | 0 | 30  | N | Pass        |
| 584969 | F | South Regi Lower Thar   | 0 | 30  | N | Distinction |
| 585025 | M | South Regi A Level or I | 0 | 30  | N | Fail        |
| 585041 | F | Amhara Re Lower Thar    | 0 | 30  | Y | Pass        |
| 585058 | F | Oromia Re A Level or I  | 0 | 30  | N | Pass        |
| 585114 | F | Addis Abak A Level or I | 0 | 30  | Y | Pass        |
| 585141 | F | Sidamo Re A Level or I  | 0 | 30  | N | Pass        |
| 585145 | F | Somalia Re A Level or I | 0 | 30  | N | Pass        |



|        |   |                         |   |    |   |             |
|--------|---|-------------------------|---|----|---|-------------|
| 585147 | F | Sidamo Re A Level or I  | 0 | 30 | N | Pass        |
| 585156 | F | Sidamo Re No Formal     | 0 | 30 | N | Fail        |
| 585199 | F | Sidamo Re Lower Tha     | 0 | 30 | N | Pass        |
| 585201 | F | Oromia Re Lower Tha     | 0 | 30 | N | Pass        |
| 585236 | F | South Wes Lower Tha     | 0 | 30 | N | Pass        |
| 585297 | M | South Regi Lower Tha    | 0 | 30 | N | Fail        |
| 585445 | F | Addis Abak A Level or I | 0 | 30 | N | Fail        |
| 585457 | F | Addis Abak A Level or I | 0 | 30 | N | Fail        |
| 585518 | F | South Regi A Level or I | 0 | 30 | N | Pass        |
| 585577 | M | Somalia Re Lower Tha    | 0 | 30 | N | Pass        |
| 585608 | F | South Regi Lower Tha    | 0 | 30 | N | Pass        |
| 585613 | F | Sidamo Re Lower Tha     | 0 | 30 | N | Pass        |
| 585668 | M | Addis Abak Lower Tha    | 0 | 30 | N | Pass        |
| 585702 | F | Sidamo Re Lower Tha     | 0 | 30 | N | Pass        |
| 585768 | F | Sidamo Re Lower Tha     | 0 | 30 | Y | Pass        |
| 585801 | F | Amhara Re Lower Tha     | 0 | 30 | N | Fail        |
| 585841 | M | Somalia Re Lower Tha    | 0 | 30 | N | Fail        |
| 585847 | F | South Wes HE Qualific   | 0 | 30 | N | Distinction |
| 586083 | F | Somalia Re Lower Tha    | 0 | 30 | N | Fail        |
| 586120 | F | North Regi Lower Tha    | 0 | 90 | N | Fail        |
| 586158 | F | South Regi Lower Tha    | 0 | 30 | N | Fail        |
| 586196 | M | Amhara Re Lower Tha     | 0 | 30 | N | Pass        |
| 586287 | M | Somalia Re A Level or I | 0 | 30 | N | Pass        |
| 586324 | F | Oromia Re Lower Tha     | 0 | 30 | N | Distinction |
| 586337 | F | South Regi Lower Tha    | 0 | 30 | N | Pass        |
| 586367 | F | South Regi Lower Tha    | 0 | 30 | N | Fail        |
| 586370 | F | Addis Abak Lower Tha    | 0 | 30 | N | Fail        |
| 586423 | M | South Regi Lower Tha    | 0 | 30 | N | Pass        |
| 586493 | F | Somalia Re A Level or I | 0 | 30 | N | Pass        |
| 586502 | F | South Regi Lower Tha    | 0 | 30 | N | Pass        |
| 586524 | M | Somalia Re Lower Tha    | 0 | 30 | N | Withdrawn   |
| 586563 | M | Addis Abak A Level or I | 0 | 30 | N | Fail        |
| 586598 | F | Addis Abak A Level or I | 0 | 30 | N | Pass        |
| 586639 | M | South Wes Lower Tha     | 0 | 30 | N | Pass        |
| 586660 | F | South Regi Lower Tha    | 0 | 30 | N | Pass        |
| 586689 | F | Oromia Re Lower Tha     | 0 | 30 | N | Pass        |
| 586787 | M | South Regi Lower Tha    | 0 | 30 | N | Pass        |
| 586814 | F | South Regi Lower Tha    | 0 | 30 | Y | Withdrawn   |
| 586818 | F | Addis Abak Lower Tha    | 0 | 30 | Y | Pass        |
| 586914 | F | Sidamo Re Lower Tha     | 0 | 30 | N | Pass        |
| 586981 | M | Sidamo Re Lower Tha     | 0 | 30 | Y | Fail        |
| 587004 | F | Addis Abak Lower Tha    | 0 | 30 | N | Pass        |
| 587150 | M | Amhara Re Lower Tha     | 0 | 90 | Y | Withdrawn   |
| 587161 | F | South Wes Lower Tha     | 0 | 30 | N | Pass        |
| 587183 | F | Sidamo Re Lower Tha     | 0 | 30 | N | Pass        |
| 587275 | M | South Wes Lower Tha     | 0 | 30 | N | Fail        |
| 587283 | F | South Regi Lower Tha    | 0 | 30 | N | Fail        |

|        |   |                         |   |    |   |             |
|--------|---|-------------------------|---|----|---|-------------|
| 587330 | M | Sidamo Re Lower Tha     | 0 | 30 | N | Distinction |
| 587362 | M | Addis Abak A Level or I | 0 | 60 | N | Distinction |
| 587374 | F | Addis Abak A Level or I | 0 | 30 | N | Withdrawn   |
| 587478 | F | South Wes Lower Tha     | 0 | 30 | N | Fail        |
| 587506 | F | Addis Abak Lower Tha    | 0 | 30 | N | Pass        |
| 587509 | M | Somalia Re A Level or I | 0 | 30 | N | Fail        |
| 587523 | F | Sidamo Re Lower Tha     | 0 | 30 | N | Pass        |
| 587529 | F | Sidamo Re HE Qualific   | 0 | 30 | N | Pass        |
| 587555 | F | Addis Abak A Level or I | 0 | 30 | N | Pass        |
| 587852 | F | Sidamo Re A Level or I  | 0 | 30 | N | Distinction |
| 587975 | F | North Regi A Level or I | 0 | 30 | N | Distinction |
| 587997 | M | South Regi Lower Tha    | 0 | 30 | N | Pass        |
| 588008 | F | Amhara Re A Level or I  | 0 | 30 | N | Pass        |
| 588014 | F | Sidamo Re Lower Tha     | 0 | 30 | Y | Distinction |
| 588078 | F | Amhara Re Lower Tha     | 0 | 30 | N | Pass        |
| 588105 | F | South Regi A Level or I | 0 | 30 | Y | Pass        |
| 588106 | F | North Regi A Level or I | 0 | 30 | N | Fail        |
| 588133 | M | South Regi Lower Tha    | 0 | 30 | N | Fail        |
| 588138 | F | Oromia Re A Level or I  | 0 | 30 | N | Pass        |
| 588233 | F | South Regi Lower Tha    | 0 | 30 | N | Distinction |
| 588289 | F | Oromia Re Lower Tha     | 0 | 30 | N | Distinction |
| 588314 | F | Addis Abak HE Qualific  | 0 | 30 | N | Pass        |
| 588363 | F | South Regi A Level or I | 0 | 30 | N | Pass        |
| 588367 | F | Sidamo Re A Level or I  | 0 | 30 | N | Pass        |
| 588382 | F | North Regi Lower Tha    | 0 | 30 | N | Pass        |
| 588391 | F | Somalia Re Lower Tha    | 0 | 30 | N | Pass        |
| 588411 | F | South Wes Lower Tha     | 0 | 30 | N | Pass        |
| 588469 | F | South Regi Lower Tha    | 0 | 30 | N | Fail        |
| 588505 | F | Sidamo Re Lower Tha     | 0 | 30 | N | Pass        |
| 588522 | F | Oromia Re Lower Tha     | 0 | 30 | N | Pass        |
| 588528 | F | South Wes Lower Tha     | 0 | 30 | N | Withdrawn   |
| 588781 | F | Sidamo Re Lower Tha     | 0 | 30 | N | Pass        |
| 588944 | M | Amhara Re A Level or I  | 0 | 30 | N | Pass        |
| 588963 | F | North Regi A Level or I | 0 | 30 | N | Fail        |
| 589048 | F | South Wes Lower Tha     | 0 | 30 | N | Fail        |
| 589126 | F | South Regi A Level or I | 0 | 30 | N | Distinction |
| 589147 | M | Oromia Re A Level or I  | 0 | 30 | N | Pass        |
| 589198 | M | South Regi Lower Tha    | 0 | 30 | N | Fail        |
| 589377 | F | Amhara Re A Level or I  | 0 | 30 | N | Distinction |
| 589395 | M | North Regi Lower Tha    | 0 | 30 | Y | Pass        |
| 589493 | F | Sidamo Re A Level or I  | 0 | 30 | N | Pass        |
| 589507 | F | South Wes Lower Tha     | 0 | 30 | N | Pass        |
| 589558 | F | Sidamo Re Lower Tha     | 0 | 30 | N | Pass        |
| 589690 | F | Somalia Re A Level or I | 0 | 30 | N | Pass        |
| 589691 | M | Sidamo Re A Level or I  | 0 | 30 | N | Fail        |
| 589702 | F | Sidamo Re Lower Tha     | 0 | 30 | N | Pass        |
| 589734 | F | South Regi A Level or I | 0 | 30 | N | Fail        |

|        |   |                         |   |    |   |             |
|--------|---|-------------------------|---|----|---|-------------|
| 589744 | M | South Regi Lower Thai   | 0 | 90 | N | Pass        |
| 589748 | F | Oromia Re Lower Thai    | 0 | 30 | N | Pass        |
| 589845 | F | Addis Abak Lower Thai   | 0 | 90 | N | Fail        |
| 589914 | M | North Regi Lower Thai   | 0 | 30 | N | Pass        |
| 589919 | F | South Regi Lower Thai   | 0 | 30 | N | Fail        |
| 589927 | F | South Regi Lower Thai   | 0 | 30 | N | Fail        |
| 589990 | F | Oromia Re Lower Thai    | 0 | 30 | Y | Pass        |
| 590028 | F | Addis Abak HE Qualific  | 0 | 30 | N | Withdrawn   |
| 590034 | F | South Regi Lower Thai   | 0 | 30 | N | Pass        |
| 590046 | F | Somalia Re Lower Thai   | 0 | 30 | N | Distinction |
| 590147 | F | Somalia Re Lower Thai   | 0 | 30 | N | Fail        |
| 590213 | F | South Regi Lower Thai   | 0 | 30 | N | Fail        |
| 590215 | F | Amhara Re HE Qualific   | 0 | 30 | N | Pass        |
| 590248 | F | Sidamo Re Lower Thai    | 0 | 30 | N | Withdrawn   |
| 590251 | M | Addis Abak A Level or I | 0 | 30 | N | Fail        |
| 590353 | F | South Regi A Level or I | 0 | 30 | N | Pass        |
| 590540 | M | North Regi Lower Thai   | 0 | 30 | N | Distinction |
| 590590 | F | South Wes Lower Thai    | 0 | 30 | N | Withdrawn   |
| 590593 | F | Amhara Re Lower Thai    | 0 | 30 | N | Pass        |
| 590662 | F | Somalia Re A Level or I | 0 | 30 | N | Fail        |
| 590711 | F | Addis Abak Lower Thai   | 0 | 30 | N | Pass        |
| 590764 | F | Addis Abak Lower Thai   | 0 | 30 | N | Distinction |
| 590835 | F | Somalia Re A Level or I | 0 | 30 | N | Fail        |
| 590836 | F | South Wes A Level or I  | 0 | 30 | N | Pass        |
| 590864 | F | Sidamo Re A Level or I  | 0 | 30 | N | Pass        |
| 591179 | M | South Regi Lower Thai   | 0 | 30 | N | Distinction |
| 591198 | F | South Regi Lower Thai   | 0 | 30 | N | Distinction |
| 591216 | F | Addis Abak Lower Thai   | 0 | 30 | Y | Withdrawn   |
| 591225 | F | Addis Abak A Level or I | 0 | 30 | N | Distinction |
| 591243 | F | South Regi Lower Thai   | 0 | 30 | N | Pass        |
| 591255 | F | South Regi Lower Thai   | 0 | 30 | N | Fail        |
| 591294 | M | Sidamo Re Post Gradu    | 0 | 30 | N | Withdrawn   |
| 591321 | M | South Regi Lower Thai   | 0 | 30 | N | Pass        |
| 591409 | M | North Regi Lower Thai   | 0 | 30 | N | Pass        |
| 591464 | F | North Regi Lower Thai   | 0 | 30 | N | Withdrawn   |
| 591549 | F | South Regi Lower Thai   | 0 | 30 | N | Pass        |
| 591588 | M | Amhara Re Lower Thai    | 0 | 30 | N | Pass        |
| 591602 | F | Amhara Re Lower Thai    | 0 | 30 | N | Pass        |
| 591671 | F | North Regi Lower Thai   | 0 | 30 | N | Fail        |
| 591804 | F | Amhara Re A Level or I  | 0 | 30 | N | Distinction |
| 591814 | F | South Regi Lower Thai   | 0 | 30 | N | Pass        |
| 591819 | F | Addis Abak Lower Thai   | 0 | 30 | N | Fail        |
| 591822 | F | Sidamo Re Lower Thai    | 0 | 30 | N | Withdrawn   |
| 591837 | F | Addis Abak Lower Thai   | 0 | 30 | N | Pass        |
| 591849 | M | Sidamo Re Lower Thai    | 0 | 30 | Y | Fail        |
| 591859 | M | South Regi Lower Thai   | 0 | 90 | N | Fail        |
| 591873 | F | Amhara Re Lower Thai    | 0 | 30 | N | Pass        |

|        |   |                         |   |     |   |             |
|--------|---|-------------------------|---|-----|---|-------------|
| 592043 | F | Sidamo Re, Lower Tha    | 0 | 30  | N | Fail        |
| 592056 | F | Sidamo Re, A Level or l | 0 | 30  | N | Pass        |
| 592059 | F | Oromia Re Lower Tha     | 0 | 30  | N | Pass        |
| 592127 | F | South Wes A Level or l  | 0 | 30  | N | Pass        |
| 592245 | F | Somalia Re Lower Tha    | 0 | 30  | N | Distinction |
| 592248 | F | South Regi Lower Tha    | 0 | 30  | N | Distinction |
| 592272 | F | South Regi Lower Tha    | 0 | 30  | N | Pass        |
| 592287 | M | Oromia Re Lower Tha     | 0 | 30  | N | Pass        |
| 592361 | F | North Regi A Level or l | 0 | 30  | N | Distinction |
| 592444 | F | South Wes A Level or l  | 0 | 30  | N | Withdrawn   |
| 592448 | F | Somalia Re Lower Tha    | 0 | 30  | N | Fail        |
| 592451 | F | Sidamo Re, A Level or l | 0 | 30  | N | Pass        |
| 592660 | F | Somalia Re Lower Tha    | 0 | 30  | N | Pass        |
| 592737 | F | Sidamo Re, A Level or l | 0 | 30  | N | Pass        |
| 592880 | F | South Regi Lower Tha    | 0 | 30  | N | Fail        |
| 592882 | F | Sidamo Re, Lower Tha    | 0 | 30  | N | Pass        |
| 593010 | F | Sidamo Re, A Level or l | 0 | 30  | N | Fail        |
| 593013 | F | Addis Abat Lower Tha    | 0 | 30  | N | Fail        |
| 593017 | F | Addis Abat A Level or l | 0 | 30  | N | Pass        |
| 593127 | F | Sidamo Re, Lower Tha    | 0 | 30  | N | Distinction |
| 593246 | F | Somalia Re A Level or l | 0 | 30  | N | Pass        |
| 593337 | F | Somalia Re Lower Tha    | 0 | 90  | N | Withdrawn   |
| 593431 | F | Amhara Re Lower Tha     | 0 | 30  | N | Fail        |
| 593438 | M | Sidamo Re, Lower Tha    | 0 | 30  | N | Fail        |
| 593540 | F | Sidamo Re, Lower Tha    | 0 | 30  | N | Pass        |
| 593546 | M | Addis Abat A Level or l | 0 | 30  | N | Pass        |
| 593569 | F | Amhara Re Lower Tha     | 0 | 30  | N | Fail        |
| 593734 | F | South Regi Lower Tha    | 0 | 30  | N | Pass        |
| 593793 | F | South Regi Lower Tha    | 0 | 30  | N | Withdrawn   |
| 593819 | F | South Wes A Level or l  | 0 | 30  | N | Pass        |
| 593840 | F | Somalia Re Lower Tha    | 0 | 30  | N | Fail        |
| 593842 | F | South Wes A Level or l  | 0 | 30  | N | Distinction |
| 593858 | F | Sidamo Re, Lower Tha    | 0 | 30  | N | Pass        |
| 593954 | F | South Wes Lower Tha     | 0 | 30  | Y | Pass        |
| 594185 | F | South Wes Lower Tha     | 0 | 30  | N | Fail        |
| 594188 | M | South Wes A Level or l  | 0 | 30  | N | Pass        |
| 594196 | M | Addis Abat Lower Tha    | 0 | 30  | N | Pass        |
| 594450 | F | South Regi A Level or l | 0 | 30  | N | Fail        |
| 594554 | F | Somalia Re Lower Tha    | 0 | 30  | N | Distinction |
| 594625 | F | Amhara Re Lower Tha     | 0 | 30  | N | Pass        |
| 594727 | F | Sidamo Re, Lower Tha    | 0 | 30  | N | Withdrawn   |
| 594745 | F | Somalia Re Lower Tha    | 0 | 30  | N | Distinction |
| 594771 | M | Amhara Re Lower Tha     | 0 | 105 | Y | Distinction |
| 594816 | F | Somalia Re A Level or l | 0 | 30  | N | Fail        |
| 594834 | F | Somalia Re Lower Tha    | 0 | 30  | N | Pass        |
| 594901 | F | Sidamo Re, Lower Tha    | 0 | 30  | Y | Fail        |
| 594910 | F | Amhara Re Lower Tha     | 0 | 30  | N | Fail        |

|        |   |                         |   |    |   |             |
|--------|---|-------------------------|---|----|---|-------------|
| 594943 | F | Amhara Re Lower Tha     | 0 | 30 | N | Pass        |
| 595185 | F | Addis Abak Lower Tha    | 0 | 30 | N | Pass        |
| 595256 | F | South Wes A Level or I  | 0 | 30 | N | Pass        |
| 595305 | F | Sidamo Re No Formal     | 0 | 30 | N | Pass        |
| 595335 | F | Sidamo Re Lower Tha     | 0 | 30 | N | Distinction |
| 595365 | F | Oromia Re Lower Tha     | 0 | 30 | N | Pass        |
| 595434 | F | Sidamo Re Lower Tha     | 0 | 30 | N | Distinction |
| 595440 | F | Amhara Re A Level or I  | 0 | 30 | Y | Distinction |
| 595474 | F | Addis Abak A Level or I | 0 | 30 | N | Distinction |
| 595496 | F | South Regi Lower Tha    | 0 | 60 | Y | Pass        |
| 595501 | F | South Regi A Level or I | 0 | 30 | N | Fail        |
| 595535 | F | Amhara Re Lower Tha     | 0 | 30 | N | Fail        |
| 595686 | F | Sidamo Re A Level or I  | 0 | 30 | N | Pass        |
| 595908 | F | Sidamo Re Lower Tha     | 0 | 30 | N | Distinction |
| 595927 | F | Addis Abak Lower Tha    | 0 | 30 | Y | Distinction |
| 595977 | F | South Regi Lower Tha    | 0 | 30 | N | Pass        |
| 596071 | M | Addis Abak Lower Tha    | 0 | 30 | N | Pass        |
| 596075 | M | Somalia Re Lower Tha    | 0 | 30 | N | Pass        |
| 596089 | M | South Regi Lower Tha    | 0 | 30 | N | Pass        |
| 596091 | M | Amhara Re A Level or I  | 0 | 30 | Y | Pass        |
| 596143 | F | Amhara Re Lower Tha     | 0 | 30 | N | Distinction |
| 596208 | F | Sidamo Re Lower Tha     | 0 | 30 | N | Pass        |
| 596214 | F | Sidamo Re Lower Tha     | 0 | 30 | N | Fail        |
| 596221 | F | Sidamo Re Lower Tha     | 0 | 30 | N | Pass        |
| 596255 | F | South Wes A Level or I  | 0 | 30 | N | Fail        |
| 596301 | F | Addis Abak Lower Tha    | 0 | 30 | N | Distinction |
| 596358 | M | Sidamo Re A Level or I  | 0 | 60 | N | Pass        |
| 596376 | F | Amhara Re A Level or I  | 0 | 30 | N | Pass        |
| 596527 | F | Oromia Re Lower Tha     | 0 | 30 | N | Pass        |
| 596618 | F | South Regi Lower Tha    | 0 | 30 | N | Fail        |
| 596636 | F | South Regi Lower Tha    | 0 | 30 | N | Pass        |
| 596694 | M | South Wes A Level or I  | 0 | 30 | N | Pass        |
| 596697 | F | Sidamo Re Lower Tha     | 0 | 30 | N | Pass        |
| 596801 | F | Oromia Re Lower Tha     | 0 | 30 | N | Pass        |
| 596819 | F | Somalia Re A Level or I | 0 | 30 | N | Fail        |
| 596824 | F | Sidamo Re Lower Tha     | 0 | 30 | Y | Pass        |
| 596943 | F | Oromia Re A Level or I  | 0 | 30 | N | Pass        |
| 597023 | F | Sidamo Re Lower Tha     | 0 | 30 | N | Withdrawn   |
| 597045 | F | South Regi A Level or I | 0 | 30 | N | Pass        |
| 597058 | F | South Regi Post Gradu   | 0 | 30 | N | Distinction |
| 597060 | F | Addis Abak Lower Tha    | 0 | 30 | N | Distinction |
| 597097 | F | South Wes Lower Tha     | 0 | 30 | Y | Pass        |
| 597114 | F | Sidamo Re A Level or I  | 0 | 30 | N | Distinction |
| 597152 | F | Addis Abak Lower Tha    | 0 | 30 | N | Fail        |
| 597212 | F | South Wes Lower Tha     | 0 | 30 | N | Withdrawn   |
| 597253 | F | Somalia Re A Level or I | 0 | 30 | N | Distinction |
| 597289 | F | Addis Abak Lower Tha    | 0 | 30 | N | Fail        |

|        |   |                         |   |    |   |             |
|--------|---|-------------------------|---|----|---|-------------|
| 597299 | F | Amhara Re Lower Tha     | 0 | 60 | N | Pass        |
| 597333 | F | Sidamo Re, A Level or I | 0 | 90 | N | Pass        |
| 597360 | F | Somalia Re A Level or I | 0 | 30 | N | Distinction |
| 597515 | F | North Regi Lower Tha    | 0 | 30 | N | Pass        |
| 597597 | M | South Regi A Level or I | 0 | 30 | N | Distinction |
| 597617 | F | South Regi Lower Tha    | 0 | 30 | Y | Pass        |
| 597669 | F | South Regi Lower Tha    | 0 | 30 | N | Pass        |
| 597936 | F | South Regi HE Qualific  | 0 | 30 | N | Fail        |
| 597941 | F | South Wes No Formal     | 0 | 30 | N | Pass        |
| 597971 | F | Addis Abak A Level or I | 0 | 30 | Y | Pass        |
| 598107 | F | South Wes Lower Tha     | 0 | 30 | N | Pass        |
| 598139 | F | Addis Abak A Level or I | 0 | 30 | N | Pass        |
| 598176 | F | South Regi A Level or I | 0 | 30 | N | Pass        |
| 598178 | M | Amhara Re Lower Tha     | 0 | 30 | N | Pass        |
| 598226 | F | Somalia Re Lower Tha    | 0 | 30 | Y | Fail        |
| 598327 | F | Somalia Re Lower Tha    | 0 | 30 | N | Pass        |
| 598406 | F | South Wes Lower Tha     | 0 | 30 | N | Fail        |
| 598420 | M | Addis Abak Lower Tha    | 0 | 30 | N | Pass        |
| 598421 | F | South Wes HE Qualific   | 0 | 30 | N | Pass        |
| 598546 | F | Oromia Re Lower Tha     | 0 | 30 | N | Fail        |
| 598667 | F | Oromia Re A Level or I  | 0 | 30 | N | Pass        |
| 598717 | M | South Regi Lower Tha    | 0 | 30 | N | Fail        |
| 598731 | F | Amhara Re No Formal     | 0 | 30 | N | Withdrawn   |
| 598762 | F | Sidamo Re, A Level or I | 0 | 60 | N | Fail        |
| 598788 | F | Addis Abak Lower Tha    | 0 | 30 | Y | Pass        |
| 598824 | F | South Regi Lower Tha    | 0 | 30 | N | Fail        |
| 598840 | M | Addis Abak A Level or I | 0 | 30 | N | Pass        |
| 598921 | M | South Regi A Level or I | 0 | 30 | N | Pass        |
| 598923 | M | South Wes Lower Tha     | 0 | 30 | N | Fail        |
| 599000 | M | Oromia Re Lower Tha     | 0 | 30 | N | Fail        |
| 599009 | F | Addis Abak Lower Tha    | 0 | 30 | N | Pass        |
| 599080 | F | South Regi No Formal    | 0 | 30 | N | Pass        |
| 599267 | F | Sidamo Re, Lower Tha    | 0 | 30 | N | Fail        |
| 599278 | F | Sidamo Re, Lower Tha    | 0 | 90 | N | Pass        |
| 599306 | F | Sidamo Re, A Level or I | 0 | 30 | N | Pass        |
| 599385 | F | Addis Abak Lower Tha    | 0 | 30 | N | Pass        |
| 599410 | M | Addis Abak A Level or I | 0 | 30 | Y | Pass        |
| 599448 | F | South Regi A Level or I | 0 | 30 | N | Fail        |
| 599499 | F | South Regi A Level or I | 0 | 30 | Y | Fail        |
| 599503 | M | Sidamo Re, Lower Tha    | 0 | 30 | N | Fail        |
| 599529 | M | South Wes A Level or I  | 0 | 30 | N | Pass        |
| 599553 | F | Sidamo Re, A Level or I | 0 | 30 | N | Fail        |
| 599804 | F | Addis Abak Lower Tha    | 0 | 30 | N | Fail        |
| 599815 | F | South Regi A Level or I | 0 | 30 | N | Pass        |
| 599853 | F | Addis Abak Lower Tha    | 0 | 30 | N | Fail        |
| 599963 | F | Somalia Re Lower Tha    | 0 | 30 | Y | Pass        |
| 600032 | M | Sidamo Re, Lower Tha    | 0 | 45 | Y | Fail        |

|        |   |                         |   |    |   |             |
|--------|---|-------------------------|---|----|---|-------------|
| 600081 | F | South Regi Lower Tha    | 0 | 30 | N | Pass        |
| 600097 | F | Amhara Re Lower Tha     | 0 | 90 | N | Pass        |
| 600202 | M | South Regi Lower Tha    | 0 | 30 | N | Pass        |
| 600266 | F | Somalia Re Lower Tha    | 0 | 30 | N | Fail        |
| 600273 | F | South Wes Lower Tha     | 0 | 30 | N | Withdrawn   |
| 600277 | F | Sidamo Re Lower Tha     | 0 | 30 | N | Pass        |
| 600305 | F | Somalia Re A Level or I | 0 | 30 | N | Pass        |
| 600315 | F | Somalia Re No Formal    | 0 | 30 | N | Fail        |
| 600320 | F | South Regi Lower Tha    | 0 | 30 | Y | Withdrawn   |
| 600325 | F | Somalia Re A Level or I | 0 | 30 | N | Fail        |
| 600461 | F | Sidamo Re No Formal     | 0 | 30 | N | Fail        |
| 600471 | M | South Regi Lower Tha    | 0 | 30 | N | Pass        |
| 600514 | F | Sidamo Re Lower Tha     | 0 | 30 | N | Distinction |
| 600566 | F | Sidamo Re A Level or I  | 0 | 60 | N | Pass        |
| 600606 | F | South Regi Lower Tha    | 0 | 30 | Y | Pass        |
| 600645 | M | South Regi A Level or I | 0 | 30 | N | Pass        |
| 600733 | F | South Regi Post Gradu   | 0 | 30 | N | Distinction |
| 600895 | M | Sidamo Re Lower Tha     | 0 | 30 | N | Pass        |
| 600906 | M | South Regi Lower Tha    | 0 | 30 | N | Withdrawn   |
| 600908 | F | Amhara Re Lower Tha     | 0 | 90 | N | Pass        |
| 601122 | F | South Regi A Level or I | 0 | 30 | N | Withdrawn   |
| 601123 | F | South Wes A Level or I  | 0 | 90 | N | Pass        |
| 601125 | F | Oromia Re A Level or I  | 0 | 30 | N | Fail        |
| 601126 | M | Sidamo Re HE Qualific   | 0 | 30 | N | Pass        |
| 601132 | F | Sidamo Re A Level or I  | 0 | 30 | N | Pass        |
| 601199 | F | Sidamo Re Lower Tha     | 0 | 30 | N | Fail        |
| 601239 | F | Addis Abak Lower Tha    | 0 | 30 | N | Fail        |
| 601275 | M | Addis Abak Lower Tha    | 0 | 30 | Y | Fail        |
| 601276 | M | Amhara Re Lower Tha     | 0 | 30 | N | Fail        |
| 601280 | F | Sidamo Re A Level or I  | 0 | 30 | N | Withdrawn   |
| 601319 | F | Oromia Re HE Qualific   | 0 | 30 | N | Pass        |
| 601360 | F | Amhara Re A Level or I  | 0 | 30 | N | Pass        |
| 601414 | M | South Regi Lower Tha    | 0 | 30 | N | Fail        |
| 601464 | F | Sidamo Re Lower Tha     | 0 | 30 | N | Pass        |
| 601465 | M | Sidamo Re Lower Tha     | 0 | 30 | N | Fail        |
| 601511 | F | Sidamo Re Lower Tha     | 0 | 30 | N | Fail        |
| 601529 | M | South Regi Lower Tha    | 0 | 30 | N | Fail        |
| 601534 | F | South Wes Lower Tha     | 0 | 30 | N | Pass        |
| 601546 | F | Amhara Re Lower Tha     | 0 | 30 | N | Fail        |
| 601576 | F | Addis Abak Lower Tha    | 0 | 30 | N | Fail        |
| 601581 | F | Addis Abak A Level or I | 0 | 30 | N | Fail        |
| 601605 | F | Somalia Re Lower Tha    | 0 | 30 | N | Pass        |
| 601645 | F | South Regi No Formal    | 0 | 30 | N | Fail        |
| 601854 | F | Amhara Re A Level or I  | 0 | 30 | N | Pass        |
| 601892 | M | Amhara Re Lower Tha     | 0 | 30 | N | Fail        |
| 601914 | M | Amhara Re Lower Tha     | 0 | 30 | N | Fail        |
| 601939 | F | Addis Abak Lower Tha    | 0 | 30 | N | Fail        |

|        |   |                         |   |    |   |             |
|--------|---|-------------------------|---|----|---|-------------|
| 601963 | M | South Regi Lower Tha    | 0 | 30 | N | Pass        |
| 601983 | F | South Wes A Level or I  | 0 | 30 | N | Pass        |
| 601997 | F | Amhara Re HE Qualific   | 0 | 30 | N | Withdrawn   |
| 602004 | F | South Regi Lower Tha    | 0 | 90 | Y | Withdrawn   |
| 602023 | F | South Wes A Level or I  | 0 | 30 | N | Fail        |
| 602026 | F | Sidamo Re Lower Tha     | 0 | 30 | N | Fail        |
| 602072 | F | South Regi A Level or I | 0 | 30 | Y | Pass        |
| 602168 | F | Somalia Re A Level or I | 0 | 30 | N | Fail        |
| 602175 | F | Sidamo Re Lower Tha     | 0 | 90 | N | Fail        |
| 602401 | M | North Regi Lower Tha    | 0 | 30 | N | Pass        |
| 602470 | F | Addis Abak Lower Tha    | 0 | 30 | N | Pass        |
| 602531 | F | South Regi Lower Tha    | 0 | 30 | N | Fail        |
| 602573 | M | South Wes Lower Tha     | 0 | 30 | N | Distinction |
| 602604 | F | South Regi A Level or I | 0 | 30 | N | Distinction |
| 602607 | F | Somalia Re A Level or I | 0 | 30 | Y | Fail        |
| 602655 | F | Amhara Re A Level or I  | 0 | 60 | N | Withdrawn   |
| 602711 | F | Oromia Re A Level or I  | 0 | 30 | N | Distinction |
| 602768 | F | Sidamo Re Lower Tha     | 0 | 30 | N | Fail        |
| 602780 | M | Sidamo Re Lower Tha     | 0 | 30 | N | Pass        |
| 602820 | F | Sidamo Re A Level or I  | 0 | 30 | N | Pass        |
| 602997 | F | Addis Abak No Formal    | 0 | 60 | N | Withdrawn   |
| 603044 | F | Sidamo Re Lower Tha     | 0 | 30 | N | Pass        |
| 603058 | F | Oromia Re Lower Tha     | 0 | 30 | N | Pass        |
| 603164 | F | Sidamo Re A Level or I  | 0 | 30 | N | Pass        |
| 603230 | F | South Regi A Level or I | 0 | 30 | N | Pass        |
| 603328 | F | Sidamo Re Lower Tha     | 0 | 30 | N | Pass        |
| 603365 | M | North Regi Lower Tha    | 0 | 30 | N | Fail        |
| 603573 | F | Somalia Re Lower Tha    | 0 | 30 | N | Fail        |
| 603579 | F | Addis Abak A Level or I | 0 | 30 | N | Pass        |
| 603585 | M | South Regi Lower Tha    | 0 | 30 | N | Fail        |
| 603685 | F | Addis Abak Lower Tha    | 0 | 30 | N | Pass        |
| 603740 | F | Amhara Re Lower Tha     | 0 | 30 | N | Fail        |
| 603763 | F | South Regi Lower Tha    | 0 | 30 | Y | Pass        |
| 603827 | F | Sidamo Re Lower Tha     | 0 | 30 | N | Fail        |
| 603913 | M | Sidamo Re Lower Tha     | 0 | 30 | N | Pass        |
| 603918 | F | South Wes A Level or I  | 0 | 30 | N | Pass        |
| 604064 | M | Oromia Re A Level or I  | 0 | 30 | N | Distinction |
| 604096 | F | Sidamo Re Lower Tha     | 0 | 30 | N | Pass        |
| 604110 | M | South Regi A Level or I | 0 | 30 | N | Distinction |
| 604153 | F | Addis Abak Lower Tha    | 0 | 30 | N | Fail        |
| 604213 | F | South Regi Lower Tha    | 0 | 30 | N | Pass        |
| 604336 | F | Somalia Re A Level or I | 0 | 30 | N | Pass        |
| 604423 | M | Amhara Re A Level or I  | 0 | 30 | N | Distinction |
| 604471 | F | South Regi Lower Tha    | 0 | 30 | N | Fail        |
| 604498 | F | Sidamo Re No Formal     | 0 | 30 | N | Pass        |
| 604534 | F | Amhara Re Lower Tha     | 0 | 30 | N | Fail        |
| 604536 | F | South Wes Lower Tha     | 0 | 30 | N | Fail        |



|        |   |                         |   |    |   |             |
|--------|---|-------------------------|---|----|---|-------------|
| 604539 | F | Somalia Re A Level or I | 0 | 30 | N | Distinction |
| 604588 | F | Sidamo Re Lower Than    | 0 | 30 | N | Withdrawn   |
| 604721 | F | Addis Abak Lower Than   | 0 | 30 | N | Pass        |
| 604930 | M | Addis Abak A Level or I | 0 | 30 | N | Distinction |
| 604980 | M | South Regi A Level or I | 0 | 30 | N | Pass        |
| 605027 | F | South Regi A Level or I | 0 | 30 | N | Pass        |
| 605072 | F | North Regi A Level or I | 0 | 30 | N | Pass        |
| 605156 | F | Addis Abak Lower Than   | 0 | 30 | N | Pass        |
| 605225 | M | Sidamo Re A Level or I  | 0 | 30 | N | Pass        |
| 605301 | F | South Regi Lower Than   | 0 | 60 | N | Pass        |
| 605306 | F | Sidamo Re Lower Than    | 0 | 90 | N | Withdrawn   |
| 605325 | F | Sidamo Re Lower Than    | 0 | 30 | N | Fail        |
| 605521 | F | Sidamo Re A Level or I  | 0 | 30 | N | Distinction |
| 605692 | F | Somalia Re A Level or I | 0 | 30 | N | Pass        |
| 605733 | M | Addis Abak Lower Than   | 0 | 30 | N | Pass        |
| 605861 | F | Addis Abak No Formal    | 0 | 30 | Y | Fail        |
| 605901 | F | South Regi A Level or I | 0 | 30 | Y | Distinction |
| 605920 | F | Addis Abak A Level or I | 0 | 30 | N | Pass        |
| 605939 | M | Sidamo Re Lower Than    | 0 | 30 | N | Withdrawn   |
| 605977 | M | South Regi Lower Than   | 0 | 30 | N | Distinction |
| 606028 | F | South Wes A Level or I  | 0 | 30 | Y | Pass        |
| 606052 | F | Amhara Re Lower Than    | 0 | 30 | Y | Fail        |
| 606233 | M | Addis Abak A Level or I | 0 | 30 | N | Pass        |
| 606245 | F | Addis Abak Lower Than   | 0 | 30 | Y | Distinction |
| 606391 | F | Sidamo Re Lower Than    | 0 | 30 | N | Distinction |
| 606409 | F | South Wes Lower Than    | 0 | 60 | N | Pass        |
| 606418 | F | Sidamo Re Lower Than    | 0 | 30 | N | Withdrawn   |
| 606435 | M | South Wes Lower Than    | 0 | 30 | N | Pass        |
| 606463 | F | Oromia Re Lower Than    | 0 | 30 | Y | Distinction |
| 606471 | M | South Regi A Level or I | 0 | 30 | N | Pass        |
| 606497 | M | South Regi A Level or I | 0 | 30 | Y | Fail        |
| 606570 | F | South Regi A Level or I | 0 | 30 | N | Pass        |
| 606574 | F | Sidamo Re A Level or I  | 0 | 30 | N | Fail        |
| 606815 | M | Oromia Re Lower Than    | 0 | 30 | N | Pass        |
| 606864 | F | Oromia Re HE Qualific   | 0 | 30 | N | Distinction |
| 606869 | F | Somalia Re Lower Than   | 0 | 30 | N | Pass        |
| 606895 | F | Sidamo Re Lower Than    | 0 | 90 | N | Fail        |
| 607018 | F | Sidamo Re Lower Than    | 0 | 30 | N | Fail        |
| 607163 | F | Oromia Re A Level or I  | 0 | 30 | N | Pass        |
| 607256 | F | South Regi Lower Than   | 0 | 30 | N | Pass        |
| 607293 | F | Amhara Re Lower Than    | 0 | 30 | N | Pass        |
| 607337 | F | Addis Abak No Formal    | 0 | 30 | N | Fail        |
| 607443 | F | Sidamo Re Lower Than    | 0 | 30 | N | Pass        |
| 607483 | M | Oromia Re Lower Than    | 0 | 30 | N | Distinction |
| 607507 | M | Addis Abak Lower Than   | 0 | 30 | N | Distinction |
| 607510 | M | Somalia Re A Level or I | 0 | 30 | N | Fail        |
| 607514 | F | Addis Abak Lower Than   | 0 | 30 | N | Fail        |

|        |   |                         |   |    |   |             |
|--------|---|-------------------------|---|----|---|-------------|
| 607548 | M | Oromia Re Lower Tha     | 0 | 30 | N | Pass        |
| 607754 | M | Somalia Re A Level or I | 0 | 30 | N | Pass        |
| 607797 | F | South Regi A Level or I | 0 | 30 | N | Pass        |
| 607798 | F | South Regi Lower Tha    | 0 | 60 | N | Fail        |
| 607827 | M | Amhara Re HE Qualific   | 0 | 30 | N | Fail        |
| 607849 | F | South Wes Lower Tha     | 0 | 30 | N | Distinction |
| 607912 | F | South Wes A Level or I  | 0 | 30 | Y | Pass        |
| 607957 | F | South Regi Lower Tha    | 0 | 30 | N | Withdrawn   |
| 608114 | M | Addis Abak A Level or I | 0 | 30 | N | Fail        |
| 608115 | M | Oromia Re A Level or I  | 0 | 30 | N | Distinction |
| 608195 | F | South Regi Lower Tha    | 0 | 30 | N | Pass        |
| 608306 | F | Sidamo Re Lower Tha     | 0 | 60 | N | Fail        |
| 608318 | M | Amhara Re Lower Tha     | 0 | 30 | N | Fail        |
| 608672 | F | Sidamo Re A Level or I  | 0 | 30 | N | Pass        |
| 608693 | F | South Regi A Level or I | 0 | 30 | Y | Fail        |
| 608714 | F | Somalia Re Lower Tha    | 0 | 30 | Y | Fail        |
| 609330 | F | Addis Abak A Level or I | 0 | 30 | Y | Pass        |
| 609399 | F | Addis Abak HE Qualific  | 0 | 30 | N | Pass        |
| 609403 | F | Somalia Re Lower Tha    | 0 | 30 | N | Pass        |
| 609535 | F | South Regi A Level or I | 0 | 30 | N | Fail        |
| 609538 | F | Amhara Re Lower Tha     | 0 | 30 | Y | Pass        |
| 609557 | F | South Regi Lower Tha    | 0 | 30 | N | Pass        |
| 609567 | F | Sidamo Re A Level or I  | 0 | 30 | N | Withdrawn   |
| 609761 | F | Addis Abak Lower Tha    | 0 | 30 | Y | Pass        |
| 609837 | F | South Wes Lower Tha     | 0 | 30 | N | Fail        |
| 609900 | M | South Regi Lower Tha    | 0 | 30 | N | Pass        |
| 609912 | F | Sidamo Re A Level or I  | 0 | 30 | N | Pass        |
| 609979 | F | Oromia Re Lower Tha     | 0 | 30 | N | Fail        |
| 610012 | M | Amhara Re No Formal     | 0 | 30 | N | Pass        |
| 610016 | F | South Regi Lower Tha    | 0 | 30 | N | Withdrawn   |
| 610057 | F | Sidamo Re A Level or I  | 0 | 30 | N | Pass        |
| 610347 | M | South Regi HE Qualific  | 0 | 30 | N | Pass        |
| 610380 | F | Addis Abak A Level or I | 0 | 30 | N | Fail        |
| 610405 | F | Amhara Re A Level or I  | 0 | 30 | N | Pass        |
| 610530 | M | Amhara Re A Level or I  | 0 | 30 | N | Fail        |
| 610557 | F | Oromia Re Lower Tha     | 0 | 30 | Y | Fail        |
| 610569 | F | Addis Abak Lower Tha    | 0 | 30 | N | Pass        |
| 610573 | F | Somalia Re Lower Tha    | 0 | 30 | N | Fail        |
| 610597 | M | Oromia Re Lower Tha     | 0 | 30 | N | Pass        |
| 610738 | F | Sidamo Re Lower Tha     | 0 | 30 | N | Fail        |
| 610739 | F | South Regi Lower Tha    | 0 | 30 | N | Pass        |
| 610749 | F | South Regi Lower Tha    | 0 | 30 | N | Pass        |
| 611058 | F | Somalia Re A Level or I | 0 | 30 | N | Fail        |
| 611138 | F | Sidamo Re Lower Tha     | 0 | 30 | N | Fail        |
| 611177 | F | South Regi Lower Tha    | 0 | 30 | N | Pass        |
| 611215 | M | Addis Abak HE Qualific  | 0 | 30 | N | Distinction |
| 611218 | F | South Regi A Level or I | 0 | 30 | N | Distinction |

|         |   |                         |   |    |   |             |
|---------|---|-------------------------|---|----|---|-------------|
| 611241  | F | Somalia Re Lower Tha    | 0 | 30 | N | Pass        |
| 611331  | M | Addis Abak A Level or I | 0 | 30 | N | Fail        |
| 611580  | F | Somalia Re A Level or I | 0 | 60 | N | Distinction |
| 612986  | M | Sidamo Re A Level or I  | 0 | 30 | N | Pass        |
| 1319732 | F | South Regi Lower Tha    | 0 | 30 | N | Pass        |
| 1341096 | F | Addis Abak Lower Tha    | 0 | 30 | N | Pass        |
| 1347253 | F | South Regi Lower Tha    | 0 | 30 | N | Pass        |
| 1470552 | F | Sidamo Re A Level or I  | 0 | 30 | N | Fail        |
| 1498979 | F | Addis Abak Lower Tha    | 0 | 30 | N | Pass        |
| 1516666 | F | Addis Abak Lower Tha    | 0 | 30 | N | Fail        |
| 1537673 | F | Sidamo Re Lower Tha     | 0 | 30 | N | Fail        |
| 1615575 | M | Sidamo Re Lower Tha     | 0 | 30 | N | Withdrawn   |
| 1674804 | M | Oromia Re A Level or I  | 0 | 30 | N | Pass        |
| 1678445 | F | South Wes Lower Tha     | 0 | 30 | N | Distinction |
| 1699264 | F | Oromia Re Lower Tha     | 0 | 60 | N | Fail        |
| 1720448 | F | Oromia Re A Level or I  | 0 | 30 | N | Distinction |
| 1729833 | F | Oromia Re A Level or I  | 0 | 30 | N | Pass        |
| 1756915 | M | Somalia Re A Level or I | 0 | 30 | N | Pass        |
| 1813731 | M | Addis Abak Lower Tha    | 0 | 60 | N | Pass        |
| 1828078 | F | Somalia Re A Level or I | 0 | 30 | Y | Fail        |
| 1830666 | F | South Regi A Level or I | 0 | 30 | Y | Fail        |
| 1873505 | F | North Regi Lower Tha    | 0 | 60 | N | Pass        |
| 1930019 | F | Sidamo Re Lower Tha     | 0 | 90 | N | Distinction |
| 1932526 | F | Sidamo Re Lower Tha     | 0 | 30 | N | Withdrawn   |
| 1953764 | F | North Regi A Level or I | 0 | 30 | N | Fail        |
| 1969985 | F | Sidamo Re Lower Tha     | 0 | 30 | Y | Pass        |
| 1986974 | F | Amhara Re Lower Tha     | 0 | 60 | N | Withdrawn   |
| 1993905 | F | South Regi Lower Tha    | 0 | 30 | N | Pass        |
| 2002057 | M | Oromia Re Lower Tha     | 0 | 30 | N | Fail        |
| 2019921 | F | Amhara Re Lower Tha     | 0 | 30 | N | Fail        |
| 2035700 | F | South Wes Lower Tha     | 0 | 45 | N | Distinction |
| 2048119 | F | South Regi A Level or I | 0 | 30 | N | Withdrawn   |
| 2067146 | F | South Regi Lower Tha    | 0 | 30 | N | Fail        |
| 2152928 | F | Sidamo Re Lower Tha     | 0 | 30 | N | Fail        |
| 2174129 | F | Addis Abak Lower Tha    | 0 | 30 | N | Distinction |
| 2180994 | F | North Regi A Level or I | 0 | 30 | N | Distinction |
| 2181700 | F | Sidamo Re Lower Tha     | 0 | 30 | N | Pass        |
| 2237783 | M | Oromia Re Lower Tha     | 0 | 30 | N | Withdrawn   |
| 2246073 | M | Sidamo Re Lower Tha     | 0 | 90 | N | Pass        |
| 2248072 | M | Addis Abak Lower Tha    | 0 | 30 | N | Pass        |
| 2248779 | F | Sidamo Re Lower Tha     | 0 | 30 | N | Fail        |
| 2248789 | F | South Regi Lower Tha    | 0 | 30 | Y | Fail        |
| 2254271 | M | Amhara Re A Level or I  | 0 | 30 | Y | Fail        |
| 2271264 | F | Somalia Re A Level or I | 0 | 30 | N | Pass        |
| 2280643 | F | South Regi A Level or I | 0 | 30 | N | Pass        |
| 2285156 | F | Amhara Re Lower Tha     | 0 | 30 | N | Distinction |
| 2312783 | M | Sidamo Re A Level or I  | 0 | 30 | N | Fail        |

|         |   |                         |   |    |   |             |
|---------|---|-------------------------|---|----|---|-------------|
| 2343354 | F | Somalia Re A Level or I | 0 | 30 | N | Pass        |
| 2349926 | F | Amhara Re A Level or I  | 0 | 30 | N | Fail        |
| 2365602 | F | Sidamo Re HE Qualific   | 0 | 30 | N | Fail        |
| 2369187 | F | South Wes A Level or I  | 0 | 30 | N | Pass        |
| 2379431 | F | Sidamo Re HE Qualific   | 0 | 30 | N | Fail        |
| 2386281 | F | Oromia Re Lower Than    | 0 | 30 | Y | Pass        |
| 2387566 | F | Amhara Re Lower Than    | 0 | 30 | N | Fail        |
| 2394352 | F | South Regi A Level or I | 0 | 30 | N | Withdrawn   |
| 2417702 | F | Oromia Re Lower Than    | 0 | 30 | N | Pass        |
| 2420364 | M | South Regi HE Qualific  | 0 | 30 | N | Pass        |
| 2440133 | F | Sidamo Re A Level or I  | 0 | 30 | N | Withdrawn   |
| 2458203 | F | South Regi Lower Than   | 0 | 30 | N | Distinction |
| 2462584 | F | Addis Abak Lower Than   | 0 | 30 | N | Pass        |
| 2464917 | M | Addis Abak Lower Than   | 0 | 60 | N | Fail        |
| 2477040 | F | South Regi A Level or I | 0 | 90 | N | Fail        |
| 2482885 | F | South Regi A Level or I | 0 | 30 | Y | Fail        |
| 2498139 | F | Somalia Re Lower Than   | 0 | 30 | Y | Distinction |
| 2511859 | F | Sidamo Re Lower Than    | 0 | 60 | Y | Pass        |
| 2516931 | F | South Wes A Level or I  | 0 | 30 | N | Fail        |
| 2519972 | F | South Regi Lower Than   | 0 | 30 | N | Fail        |
| 2540288 | F | South Regi A Level or I | 0 | 30 | N | Fail        |
| 2540450 | M | Sidamo Re A Level or I  | 0 | 30 | N | Fail        |
| 2542291 | F | Addis Abak A Level or I | 0 | 30 | N | Pass        |
| 2542342 | F | North Regi Lower Than   | 0 | 30 | N | Fail        |
| 2555098 | F | Amhara Re Lower Than    | 0 | 30 | Y | Fail        |
| 2561971 | F | South Wes A Level or I  | 0 | 30 | N | Pass        |
| 2591672 | F | Sidamo Re A Level or I  | 0 | 30 | N | Fail        |
| 2599817 | F | Addis Abak Lower Than   | 0 | 30 | N | Pass        |
| 2621695 | F | Oromia Re Lower Than    | 0 | 30 | N | Pass        |
| 2638532 | M | South Wes A Level or I  | 0 | 30 | N | Pass        |
| 2643122 | F | South Wes Lower Than    | 0 | 30 | N | Pass        |
| 2649341 | F | South Regi Lower Than   | 0 | 30 | N | Fail        |
| 2653027 | F | Sidamo Re Lower Than    | 0 | 30 | N | Fail        |
| 2656100 | F | Addis Abak Lower Than   | 0 | 30 | Y | Pass        |
| 2670570 | M | Sidamo Re A Level or I  | 0 | 30 | N | Pass        |
| 2673510 | F | Somalia Re Lower Than   | 0 | 30 | N | Withdrawn   |
| 2674822 | F | Amhara Re A Level or I  | 0 | 30 | N | Fail        |
| 2679386 | F | South Regi A Level or I | 0 | 30 | N | Distinction |
| 2679694 | F | South Wes A Level or I  | 0 | 30 | N | Fail        |
| 24186   | F | Sidamo Re Lower Than    | 0 | 30 | Y | Pass        |
| 29985   | F | South Regi Lower Than   | 0 | 30 | N | Pass        |
| 31107   | M | South Wes Lower Than    | 0 | 30 | N | Pass        |
| 38187   | F | Addis Abak Lower Than   | 0 | 30 | N | Withdrawn   |
| 41414   | F | South Regi Lower Than   | 0 | 30 | Y | Pass        |
| 49123   | M | Sidamo Re Lower Than    | 0 | 30 | N | Pass        |
| 64901   | M | Sidamo Re Lower Than    | 0 | 30 | N | Pass        |
| 81754   | F | Amhara Re A Level or I  | 1 | 60 | N | Withdrawn   |

|        |   |                         |   |    |   |             |
|--------|---|-------------------------|---|----|---|-------------|
| 96423  | F | Oromia Re Lower Tha     | 0 | 30 | N | Pass        |
| 109772 | F | South Regi A Level or I | 0 | 30 | N | Pass        |
| 112441 | F | South Regi A Level or I | 0 | 30 | N | Pass        |
| 116319 | F | Addis Abak Lower Tha    | 0 | 30 | N | Pass        |
| 117969 | F | Sidamo Re Lower Tha     | 0 | 30 | N | Withdrawn   |
| 118474 | M | Addis Abak A Level or I | 1 | 60 | N | Distinction |
| 119444 | F | Somalia Re Lower Tha    | 0 | 30 | N | Pass        |
| 120611 | M | South Regi A Level or I | 0 | 30 | N | Fail        |
| 122337 | F | Sidamo Re Lower Tha     | 0 | 30 | N | Fail        |
| 124944 | M | Amhara Re HE Qualific   | 0 | 30 | N | Pass        |
| 131820 | F | South Regi Lower Tha    | 0 | 30 | N | Fail        |
| 133068 | M | Addis Abak A Level or I | 0 | 60 | N | Pass        |
| 134123 | F | South Regi Lower Tha    | 0 | 30 | N | Pass        |
| 139329 | F | Addis Abak Lower Tha    | 1 | 60 | Y | Pass        |
| 145388 | F | Amhara Re Lower Tha     | 0 | 30 | N | Fail        |
| 146192 | F | South Regi Lower Tha    | 1 | 60 | N | Fail        |
| 152671 | F | North Regi A Level or I | 0 | 30 | N | Distinction |
| 159571 | F | Sidamo Re A Level or I  | 0 | 30 | N | Fail        |
| 160479 | F | South Regi A Level or I | 0 | 30 | N | Pass        |
| 160945 | F | Addis Abak HE Qualific  | 0 | 30 | N | Pass        |
| 164211 | F | Addis Abak A Level or I | 0 | 30 | N | Distinction |
| 164451 | F | North Regi Lower Tha    | 0 | 90 | N | Withdrawn   |
| 165898 | F | South Wes Lower Tha     | 0 | 30 | Y | Fail        |
| 168845 | F | Addis Abak Lower Tha    | 0 | 30 | N | Withdrawn   |
| 178935 | F | Sidamo Re Lower Tha     | 0 | 30 | N | Withdrawn   |
| 184137 | F | South Regi A Level or I | 0 | 30 | N | Distinction |
| 191235 | F | Addis Abak Lower Tha    | 0 | 30 | N | Withdrawn   |
| 198315 | F | South Regi A Level or I | 1 | 60 | Y | Fail        |
| 203963 | F | Sidamo Re Lower Tha     | 0 | 30 | N | Pass        |
| 204550 | F | South Regi Lower Tha    | 0 | 30 | N | Fail        |
| 204738 | M | Amhara Re HE Qualific   | 0 | 90 | N | Distinction |
| 233461 | F | Sidamo Re A Level or I  | 0 | 30 | N | Fail        |
| 245802 | F | Oromia Re A Level or I  | 0 | 30 | Y | Pass        |
| 254417 | M | Sidamo Re Lower Tha     | 0 | 30 | N | Fail        |
| 261342 | M | Amhara Re Lower Tha     | 0 | 30 | N | Pass        |
| 278962 | F | Sidamo Re Lower Tha     | 0 | 30 | N | Distinction |
| 279839 | F | Somalia Re Lower Tha    | 0 | 30 | N | Withdrawn   |
| 282388 | M | Somalia Re Lower Tha    | 0 | 30 | N | Fail        |
| 282962 | M | South Regi Lower Tha    | 0 | 30 | Y | Fail        |
| 283035 | M | South Regi Lower Tha    | 0 | 30 | N | Fail        |
| 285193 | F | South Regi Lower Tha    | 0 | 30 | Y | Distinction |
| 285223 | F | South Regi Lower Tha    | 0 | 30 | N | Fail        |
| 285861 | F | Amhara Re Lower Tha     | 0 | 30 | N | Fail        |
| 299536 | F | South Wes Lower Tha     | 0 | 30 | Y | Fail        |
| 301498 | F | Sidamo Re Lower Tha     | 0 | 30 | N | Pass        |
| 304106 | M | South Regi A Level or I | 0 | 30 | Y | Fail        |
| 305792 | F | South Regi A Level or I | 0 | 30 | N | Pass        |

|        |   |                         |   |    |   |             |
|--------|---|-------------------------|---|----|---|-------------|
| 324773 | F | Oromia Re A Level or l  | 0 | 30 | N | Distinction |
| 344098 | F | South Wes A Level or l  | 0 | 30 | N | Pass        |
| 345737 | F | Sidamo Re A Level or l  | 1 | 60 | Y | Withdrawn   |
| 345881 | F | South Regi A Level or l | 1 | 60 | N | Pass        |
| 350473 | F | South Regi A Level or l | 0 | 30 | Y | Fail        |
| 359645 | F | Oromia Re Lower Tha     | 0 | 30 | N | Withdrawn   |
| 365084 | F | South Regi A Level or l | 0 | 30 | N | Pass        |
| 366371 | F | Sidamo Re A Level or l  | 0 | 30 | N | Fail        |
| 366771 | M | Amhara Re A Level or l  | 0 | 30 | N | Distinction |
| 372837 | F | Amhara Re A Level or l  | 0 | 30 | N | Fail        |
| 374266 | F | South Regi Lower Tha    | 0 | 30 | N | Distinction |
| 380238 | F | South Regi Lower Tha    | 0 | 30 | Y | Pass        |
| 380894 | F | South Regi A Level or l | 0 | 30 | N | Pass        |
| 383420 | M | North Regi A Level or l | 1 | 60 | Y | Pass        |
| 384035 | F | Oromia Re A Level or l  | 0 | 30 | N | Pass        |
| 385228 | F | Sidamo Re Lower Tha     | 0 | 30 | N | Pass        |
| 387294 | F | North Regi Lower Tha    | 0 | 30 | N | Pass        |
| 391937 | F | South Wes A Level or l  | 0 | 30 | N | Pass        |
| 393682 | F | Sidamo Re A Level or l  | 0 | 30 | N | Fail        |
| 394024 | F | South Regi Lower Tha    | 0 | 30 | N | Pass        |
| 398029 | F | Sidamo Re Lower Tha     | 0 | 30 | N | Fail        |
| 399120 | F | Sidamo Re Lower Tha     | 0 | 30 | N | Withdrawn   |
| 401909 | F | Sidamo Re Lower Tha     | 0 | 30 | Y | Withdrawn   |
| 406751 | F | South Regi Lower Tha    | 0 | 30 | Y | Pass        |
| 411546 | F | Oromia Re Lower Tha     | 1 | 60 | N | Fail        |
| 414668 | M | South Regi A Level or l | 0 | 30 | N | Distinction |
| 414696 | M | South Regi Lower Tha    | 0 | 30 | N | Pass        |
| 415399 | M | Addis Abak Lower Tha    | 1 | 60 | N | Fail        |
| 415818 | F | South Regi Lower Tha    | 0 | 30 | N | Pass        |
| 417096 | F | Oromia Re Lower Tha     | 0 | 30 | N | Pass        |
| 425257 | M | Somalia Re A Level or l | 0 | 30 | N | Fail        |
| 426547 | F | South Regi A Level or l | 0 | 30 | Y | Pass        |
| 441791 | M | Sidamo Re Lower Tha     | 0 | 30 | N | Pass        |
| 442561 | F | Oromia Re A Level or l  | 0 | 30 | N | Pass        |
| 442618 | F | South Regi A Level or l | 0 | 30 | N | Withdrawn   |
| 442877 | F | Oromia Re Lower Tha     | 0 | 30 | Y | Pass        |
| 442949 | M | South Regi Lower Tha    | 0 | 30 | N | Fail        |
| 443387 | M | Sidamo Re Lower Tha     | 0 | 30 | N | Pass        |
| 447475 | F | Somalia Re Lower Tha    | 0 | 30 | N | Distinction |
| 469284 | M | Sidamo Re A Level or l  | 0 | 30 | N | Fail        |
| 472511 | M | South Regi Lower Tha    | 0 | 30 | N | Pass        |
| 480086 | F | South Wes Lower Tha     | 0 | 30 | N | Pass        |
| 480590 | F | South Regi Lower Tha    | 0 | 30 | Y | Pass        |
| 481762 | F | Somalia Re A Level or l | 1 | 60 | N | Pass        |
| 482677 | F | Oromia Re Lower Tha     | 1 | 60 | N | Pass        |
| 483582 | M | Oromia Re Lower Tha     | 0 | 30 | N | Fail        |
| 485448 | F | South Wes Lower Tha     | 0 | 30 | N | Distinction |

|        |   |                         |   |     |   |             |
|--------|---|-------------------------|---|-----|---|-------------|
| 486279 | M | South Wes Lower Thai    | 0 | 30  | N | Distinction |
| 487278 | M | South Regi Lower Thai   | 0 | 60  | N | Distinction |
| 488445 | F | Oromia Re Lower Thai    | 0 | 30  | N | Pass        |
| 491474 | M | South Wes Lower Thai    | 0 | 30  | N | Fail        |
| 491607 | F | South Wes A Level or I  | 0 | 30  | N | Withdrawn   |
| 492909 | F | Sidamo Re Lower Thai    | 0 | 30  | N | Distinction |
| 495976 | F | Oromia Re Lower Thai    | 0 | 30  | N | Pass        |
| 496978 | F | Amhara Re Lower Thai    | 0 | 90  | N | Distinction |
| 497619 | F | Sidamo Re Lower Thai    | 1 | 60  | N | Fail        |
| 501755 | M | South Regi Lower Thai   | 0 | 30  | N | Pass        |
| 502182 | F | South Regi Lower Thai   | 0 | 30  | N | Pass        |
| 502709 | M | Addis Abak HE Qualific  | 0 | 30  | N | Distinction |
| 502763 | F | Sidamo Re Lower Thai    | 0 | 60  | N | Fail        |
| 503201 | M | Amhara Re Lower Thai    | 0 | 30  | N | Fail        |
| 506533 | F | Amhara Re Lower Thai    | 1 | 60  | Y | Pass        |
| 507334 | F | Addis Abak Lower Thai   | 0 | 30  | N | Pass        |
| 508573 | F | South Wes Lower Thai    | 1 | 60  | N | Pass        |
| 508924 | F | Addis Abak HE Qualific  | 0 | 30  | N | Pass        |
| 510874 | F | Amhara Re A Level or I  | 0 | 30  | N | Pass        |
| 511228 | F | Oromia Re Lower Thai    | 0 | 30  | Y | Pass        |
| 511492 | F | Oromia Re Lower Thai    | 1 | 60  | N | Fail        |
| 515051 | F | Sidamo Re Lower Thai    | 0 | 30  | N | Fail        |
| 518145 | F | South Regi Lower Thai   | 0 | 30  | Y | Pass        |
| 518661 | F | South Regi Lower Thai   | 0 | 30  | N | Pass        |
| 519910 | F | South Regi Lower Thai   | 0 | 30  | N | Fail        |
| 521644 | F | Sidamo Re HE Qualific   | 0 | 30  | N | Distinction |
| 523427 | M | Sidamo Re A Level or I  | 0 | 30  | N | Withdrawn   |
| 532441 | F | Somalia Re A Level or I | 0 | 30  | N | Withdrawn   |
| 532473 | F | Sidamo Re Lower Thai    | 0 | 30  | Y | Withdrawn   |
| 533054 | F | Somalia Re A Level or I | 0 | 60  | N | Distinction |
| 538918 | F | Addis Abak Lower Thai   | 0 | 30  | N | Fail        |
| 541044 | F | Addis Abak Lower Thai   | 0 | 30  | N | Withdrawn   |
| 541890 | F | Somalia Re A Level or I | 0 | 30  | N | Pass        |
| 542562 | F | Oromia Re A Level or I  | 0 | 240 | Y | Pass        |
| 543910 | F | South Regi Lower Thai   | 0 | 30  | N | Pass        |
| 545665 | F | South Wes A Level or I  | 0 | 60  | Y | Distinction |
| 547155 | F | Addis Abak No Formal    | 1 | 60  | N | Pass        |
| 548578 | F | South Wes No Formal     | 0 | 90  | N | Fail        |
| 549603 | F | South Regi Lower Thai   | 0 | 30  | N | Fail        |
| 550515 | F | Somalia Re Lower Thai   | 0 | 30  | N | Pass        |
| 550662 | F | Amhara Re Lower Thai    | 0 | 30  | N | Fail        |
| 550758 | F | South Wes A Level or I  | 0 | 90  | Y | Distinction |
| 551562 | F | Addis Abak A Level or I | 1 | 60  | N | Fail        |
| 552486 | M | Sidamo Re Lower Thai    | 0 | 30  | N | Distinction |
| 552509 | F | Sidamo Re Lower Thai    | 0 | 30  | N | Fail        |
| 553640 | F | Addis Abak A Level or I | 0 | 30  | N | Withdrawn   |
| 556406 | F | Addis Abak A Level or I | 0 | 30  | N | Pass        |

|        |   |                         |   |     |   |             |
|--------|---|-------------------------|---|-----|---|-------------|
| 556463 | F | Sidamo Re, A Level or I | 0 | 30  | N | Fail        |
| 561441 | F | South Regi Lower Tha    | 1 | 60  | N | Withdrawn   |
| 562628 | F | South Regi Lower Tha    | 0 | 30  | N | Pass        |
| 563301 | F | Addis Abak Lower Tha    | 0 | 30  | N | Fail        |
| 566818 | F | Sidamo Re, Lower Tha    | 0 | 30  | Y | Fail        |
| 568572 | M | Sidamo Re, A Level or I | 0 | 90  | N | Withdrawn   |
| 568863 | M | South Wes A Level or I  | 0 | 30  | N | Fail        |
| 569093 | F | South Regi A Level or I | 0 | 30  | N | Pass        |
| 571089 | F | Amhara Re Lower Tha     | 0 | 30  | N | Pass        |
| 573834 | F | South Wes A Level or I  | 0 | 30  | Y | Fail        |
| 575199 | F | Amhara Re Lower Tha     | 0 | 30  | N | Pass        |
| 575217 | M | Addis Abak Lower Tha    | 0 | 30  | N | Pass        |
| 575324 | M | Amhara Re Lower Tha     | 1 | 60  | N | Fail        |
| 575693 | F | Sidamo Re, A Level or I | 0 | 30  | N | Withdrawn   |
| 575709 | F | Sidamo Re, A Level or I | 0 | 30  | N | Pass        |
| 576416 | F | Sidamo Re, Lower Tha    | 0 | 30  | N | Withdrawn   |
| 576658 | F | Somalia Re Lower Tha    | 0 | 90  | N | Withdrawn   |
| 577000 | M | Somalia Re Lower Tha    | 1 | 60  | N | Pass        |
| 577136 | F | Addis Abak A Level or I | 0 | 30  | N | Pass        |
| 577275 | F | Amhara Re HE Qualific   | 0 | 90  | Y | Distinction |
| 577474 | F | Sidamo Re, Lower Tha    | 0 | 120 | N | Withdrawn   |
| 577792 | F | South Wes Lower Tha     | 0 | 30  | N | Distinction |
| 578389 | M | South Wes A Level or I  | 0 | 30  | N | Pass        |
| 578452 | F | Amhara Re Lower Tha     | 0 | 30  | Y | Pass        |
| 578845 | F | North Regi A Level or I | 0 | 30  | N | Fail        |
| 579692 | M | South Wes Lower Tha     | 1 | 120 | N | Pass        |
| 582033 | M | Sidamo Re, Lower Tha    | 0 | 30  | N | Fail        |
| 582283 | F | Addis Abak Lower Tha    | 0 | 30  | N | Pass        |
| 583101 | F | Amhara Re A Level or I  | 0 | 150 | N | Fail        |
| 583148 | F | South Regi Lower Tha    | 0 | 30  | N | Pass        |
| 583686 | F | Somalia Re A Level or I | 0 | 30  | N | Withdrawn   |
| 583687 | F | Amhara Re Lower Tha     | 1 | 120 | Y | Fail        |
| 586054 | F | South Wes Lower Tha     | 0 | 30  | N | Fail        |
| 586494 | F | South Regi A Level or I | 1 | 60  | N | Distinction |
| 587287 | M | South Regi A Level or I | 1 | 60  | N | Fail        |
| 587613 | F | Addis Abak A Level or I | 1 | 60  | N | Fail        |
| 588031 | M | South Wes Lower Tha     | 1 | 60  | N | Pass        |
| 588489 | F | Sidamo Re, Lower Tha    | 0 | 30  | Y | Fail        |
| 588940 | M | South Regi A Level or I | 1 | 60  | N | Fail        |
| 589009 | F | South Wes Lower Tha     | 0 | 30  | N | Pass        |
| 589053 | F | Sidamo Re, Lower Tha    | 1 | 60  | N | Pass        |
| 589973 | F | Sidamo Re, Lower Tha    | 0 | 90  | Y | Fail        |
| 590445 | F | South Wes Lower Tha     | 0 | 30  | N | Pass        |
| 590739 | F | South Regi Lower Tha    | 0 | 30  | N | Fail        |
| 590758 | F | Somalia Re Lower Tha    | 0 | 30  | N | Fail        |
| 591563 | F | South Wes Lower Tha     | 0 | 30  | N | Pass        |
| 592001 | F | Sidamo Re, A Level or I | 0 | 30  | N | Fail        |



|        |   |                         |   |     |   |             |
|--------|---|-------------------------|---|-----|---|-------------|
| 592190 | F | Sidamo Re Lower Tha     | 0 | 30  | Y | Pass        |
| 593121 | F | Amhara Re Lower Tha     | 0 | 30  | N | Pass        |
| 593785 | M | Sidamo Re Lower Tha     | 0 | 30  | N | Pass        |
| 593965 | F | South Regi A Level or I | 0 | 30  | N | Distinction |
| 594167 | F | Addis Abak Lower Tha    | 0 | 30  | N | Distinction |
| 594723 | F | Amhara Re Lower Tha     | 0 | 30  | N | Distinction |
| 594908 | M | Addis Abak Lower Tha    | 1 | 60  | N | Fail        |
| 595102 | F | South Regi A Level or I | 0 | 30  | N | Pass        |
| 595343 | F | Sidamo Re Lower Tha     | 0 | 30  | N | Pass        |
| 595572 | F | South Regi A Level or I | 1 | 60  | N | Pass        |
| 596307 | F | Sidamo Re Lower Tha     | 0 | 30  | N | Fail        |
| 596382 | F | Amhara Re A Level or I  | 0 | 30  | N | Fail        |
| 596513 | F | Sidamo Re Lower Tha     | 1 | 60  | N | Pass        |
| 596588 | M | Somalia Re A Level or I | 1 | 60  | N | Pass        |
| 596751 | F | South Wes A Level or I  | 0 | 30  | N | Distinction |
| 597010 | F | South Regi Lower Tha    | 1 | 60  | N | Pass        |
| 597037 | F | Amhara Re Lower Tha     | 0 | 30  | N | Fail        |
| 598017 | M | Amhara Re A Level or I  | 0 | 30  | N | Distinction |
| 598127 | F | Amhara Re A Level or I  | 0 | 30  | N | Fail        |
| 598496 | F | Oromia Re Lower Tha     | 1 | 60  | N | Fail        |
| 598564 | F | South Regi Lower Tha    | 0 | 30  | N | Fail        |
| 599144 | F | Somalia Re A Level or I | 0 | 30  | N | Pass        |
| 599276 | F | Addis Abak A Level or I | 0 | 30  | N | Distinction |
| 599277 | F | Amhara Re A Level or I  | 0 | 30  | N | Fail        |
| 599467 | M | South Wes Lower Tha     | 1 | 60  | N | Pass        |
| 599620 | F | South Regi A Level or I | 0 | 30  | N | Pass        |
| 600035 | F | South Regi Lower Tha    | 0 | 90  | N | Pass        |
| 600390 | M | Oromia Re Lower Tha     | 0 | 30  | Y | Withdrawn   |
| 600714 | F | Amhara Re A Level or I  | 0 | 30  | N | Pass        |
| 601064 | M | Addis Abak A Level or I | 1 | 60  | N | Pass        |
| 602045 | F | South Regi A Level or I | 0 | 30  | N | Distinction |
| 602061 | F | Addis Abak Lower Tha    | 1 | 60  | N | Fail        |
| 602616 | M | North Regi Lower Tha    | 0 | 150 | N | Withdrawn   |
| 602655 | F | Amhara Re A Level or I  | 1 | 60  | N | Distinction |
| 602858 | M | Amhara Re Lower Tha     | 0 | 30  | N | Fail        |
| 602997 | F | Addis Abak No Formal    | 1 | 60  | N | Withdrawn   |
| 603064 | F | Somalia Re Lower Tha    | 0 | 30  | Y | Fail        |
| 603124 | F | Oromia Re A Level or I  | 0 | 30  | N | Withdrawn   |
| 603612 | F | Amhara Re A Level or I  | 1 | 60  | N | Fail        |
| 603921 | F | Somalia Re Lower Tha    | 0 | 90  | N | Pass        |
| 604482 | M | North Regi Lower Tha    | 1 | 60  | N | Fail        |
| 604504 | M | South Regi No Formal    | 0 | 30  | N | Distinction |
| 604901 | F | Addis Abak Lower Tha    | 0 | 30  | Y | Pass        |
| 605176 | F | Oromia Re A Level or I  | 0 | 90  | N | Fail        |
| 605375 | F | Sidamo Re A Level or I  | 1 | 60  | Y | Pass        |
| 605445 | F | Sidamo Re Lower Tha     | 1 | 60  | N | Pass        |
| 605556 | F | South Regi A Level or I | 1 | 60  | N | Pass        |

|        |   |                         |   |    |   |             |
|--------|---|-------------------------|---|----|---|-------------|
| 605702 | F | Sidamo Re, A Level or I | 0 | 30 | N | Fail        |
| 605828 | F | Oromia Re Lower Than    | 0 | 30 | Y | Pass        |
| 606101 | F | Somalia Re Lower Than   | 0 | 60 | N | Pass        |
| 606175 | F | Oromia Re A Level or I  | 0 | 30 | N | Pass        |
| 606274 | M | Somalia Re A Level or I | 1 | 60 | N | Fail        |
| 606296 | F | Somalia Re Lower Than   | 1 | 60 | N | Pass        |
| 606389 | M | Oromia Re Lower Than    | 0 | 30 | N | Pass        |
| 606602 | F | Amhara Re Lower Than    | 1 | 60 | N | Fail        |
| 606705 | F | Somalia Re Lower Than   | 0 | 30 | N | Fail        |
| 606707 | F | South Regi A Level or I | 0 | 30 | N | Distinction |
| 606858 | M | North Regi Lower Than   | 0 | 30 | N | Pass        |
| 607235 | F | South Regi A Level or I | 0 | 30 | N | Distinction |
| 607530 | F | Somalia Re Lower Than   | 1 | 60 | N | Pass        |
| 607536 | F | Addis Abak Lower Than   | 0 | 30 | N | Pass        |
| 607547 | F | South Regi Lower Than   | 1 | 60 | N | Pass        |
| 607738 | F | Sidamo Re, Lower Than   | 0 | 30 | N | Withdrawn   |
| 607762 | M | South Regi A Level or I | 0 | 30 | N | Distinction |
| 608109 | F | Sidamo Re, Lower Than   | 0 | 30 | N | Pass        |
| 608221 | F | North Regi Lower Than   | 0 | 30 | N | Fail        |
| 608263 | F | South Wes Lower Than    | 0 | 30 | N | Distinction |
| 608292 | M | Oromia Re A Level or I  | 0 | 30 | N | Pass        |
| 608596 | F | South Regi Lower Than   | 1 | 60 | N | Pass        |
| 608628 | F | Sidamo Re, Lower Than   | 0 | 30 | N | Fail        |
| 608649 | M | Somalia Re Lower Than   | 0 | 30 | Y | Withdrawn   |
| 608907 | F | South Regi Lower Than   | 1 | 60 | N | Pass        |
| 609297 | F | South Regi Lower Than   | 0 | 30 | N | Pass        |
| 609326 | F | Sidamo Re, Lower Than   | 0 | 30 | N | Pass        |
| 609365 | F | South Regi Lower Than   | 0 | 30 | N | Fail        |
| 609754 | F | Addis Abak A Level or I | 0 | 30 | N | Pass        |
| 610127 | F | Sidamo Re, Lower Than   | 0 | 30 | N | Pass        |
| 610336 | F | Amhara Re A Level or I  | 1 | 60 | N | Fail        |
| 610398 | F | Sidamo Re, Lower Than   | 1 | 60 | N | Pass        |
| 610461 | F | North Regi Lower Than   | 0 | 30 | N | Fail        |
| 610917 | F | Sidamo Re, A Level or I | 0 | 30 | N | Fail        |
| 610967 | F | Somalia Re A Level or I | 0 | 30 | N | Fail        |
| 611195 | M | South Regi A Level or I | 0 | 30 | N | Pass        |
| 611351 | F | South Wes A Level or I  | 0 | 30 | N | Withdrawn   |
| 611489 | F | Amhara Re A Level or I  | 0 | 30 | N | Distinction |
| 611496 | F | Amhara Re A Level or I  | 0 | 30 | N | Distinction |
| 611534 | F | Sidamo Re, Lower Than   | 1 | 60 | N | Fail        |
| 611612 | F | South Regi Lower Than   | 0 | 60 | N | Pass        |
| 611629 | F | Addis Abak Lower Than   | 0 | 30 | Y | Fail        |
| 611962 | F | South Wes A Level or I  | 0 | 30 | N | Pass        |
| 612002 | F | South Wes A Level or I  | 0 | 30 | N | Pass        |
| 612039 | F | Amhara Re Lower Than    | 0 | 30 | N | Distinction |
| 612089 | F | Somalia Re Lower Than   | 0 | 30 | N | Fail        |
| 612149 | F | Sidamo Re, HE Qualific  | 0 | 30 | N | Fail        |

|        |   |                         |   |      |             |
|--------|---|-------------------------|---|------|-------------|
| 612207 | F | Amhara Re Lower Tha     | 0 | 30 N | Fail        |
| 612319 | M | Sidamo Re A Level or I  | 0 | 30 N | Pass        |
| 612363 | F | Addis Abak A Level or I | 0 | 30 N | Fail        |
| 612385 | F | Somalia Re A Level or I | 0 | 30 N | Withdrawn   |
| 612459 | F | Amhara Re Lower Tha     | 0 | 30 N | Fail        |
| 612565 | F | Oromia Re Lower Tha     | 0 | 30 N | Pass        |
| 612620 | F | Oromia Re Lower Tha     | 0 | 30 N | Fail        |
| 612621 | F | Addis Abak Lower Tha    | 0 | 30 N | Pass        |
| 612690 | F | North Regi Lower Tha    | 0 | 30 N | Pass        |
| 612709 | M | South Wes Lower Tha     | 0 | 30 Y | Withdrawn   |
| 612711 | F | South Wes Lower Tha     | 0 | 30 N | Fail        |
| 612797 | F | Amhara Re Lower Tha     | 0 | 30 N | Pass        |
| 612870 | F | Addis Abak A Level or I | 0 | 30 N | Pass        |
| 612903 | F | South Wes A Level or I  | 0 | 30 N | Pass        |
| 612929 | F | Sidamo Re A Level or I  | 0 | 30 Y | Fail        |
| 613015 | F | South Regi A Level or I | 0 | 30 N | Distinction |
| 613039 | M | North Regi Lower Tha    | 0 | 30 N | Fail        |
| 613131 | F | Addis Abak Lower Tha    | 0 | 30 N | Pass        |
| 613227 | F | Sidamo Re Lower Tha     | 0 | 30 N | Fail        |
| 613235 | M | Amhara Re A Level or I  | 0 | 30 Y | Pass        |
| 613300 | F | South Wes A Level or I  | 0 | 30 N | Distinction |
| 613407 | F | Oromia Re Lower Tha     | 0 | 30 N | Fail        |
| 613611 | F | Amhara Re Lower Tha     | 0 | 30 N | Fail        |
| 613616 | M | Sidamo Re Lower Tha     | 0 | 30 Y | Fail        |
| 613639 | F | Amhara Re Lower Tha     | 0 | 30 N | Fail        |
| 613646 | F | Amhara Re Lower Tha     | 0 | 30 N | Distinction |
| 613675 | F | Addis Abak Lower Tha    | 0 | 30 N | Fail        |
| 613683 | F | South Regi A Level or I | 0 | 30 N | Pass        |
| 613691 | M | Somalia Re Lower Tha    | 0 | 30 N | Pass        |
| 613720 | F | Sidamo Re Lower Tha     | 0 | 90 N | Distinction |
| 613972 | F | Oromia Re Lower Tha     | 0 | 30 N | Fail        |
| 613981 | F | Amhara Re Lower Tha     | 0 | 30 N | Fail        |
| 613988 | F | South Wes A Level or I  | 0 | 30 Y | Pass        |
| 613993 | M | Sidamo Re Lower Tha     | 0 | 30 N | Fail        |
| 614073 | F | South Wes Lower Tha     | 0 | 30 N | Withdrawn   |
| 614129 | F | Sidamo Re Lower Tha     | 0 | 30 N | Fail        |
| 614142 | F | North Regi Lower Tha    | 0 | 30 N | Fail        |
| 614162 | M | South Regi A Level or I | 0 | 30 N | Pass        |
| 614204 | F | South Wes A Level or I  | 0 | 30 N | Fail        |
| 614224 | F | South Regi Lower Tha    | 0 | 30 Y | Fail        |
| 614233 | F | Amhara Re Lower Tha     | 0 | 30 N | Fail        |
| 614249 | F | Amhara Re Lower Tha     | 0 | 30 N | Fail        |
| 614262 | F | Sidamo Re Lower Tha     | 0 | 30 N | Withdrawn   |
| 614398 | F | Amhara Re A Level or I  | 0 | 30 N | Distinction |
| 614419 | F | Sidamo Re Lower Tha     | 0 | 30 N | Fail        |
| 614424 | F | Sidamo Re A Level or I  | 0 | 30 N | Distinction |
| 614571 | F | Addis Abak Lower Tha    | 0 | 30 N | Pass        |

|        |   |                         |   |    |   |             |
|--------|---|-------------------------|---|----|---|-------------|
| 614582 | F | Addis Abat Lower Tha    | 0 | 30 | N | Pass        |
| 614892 | M | South Wes Lower Tha     | 0 | 30 | N | Pass        |
| 614893 | F | Oromia Re A Level or I  | 0 | 30 | N | Pass        |
| 615001 | F | Sidamo Re Lower Tha     | 0 | 30 | N | Distinction |
| 615078 | F | South Wes A Level or I  | 0 | 30 | N | Distinction |
| 615085 | F | Amhara Re Lower Tha     | 0 | 30 | N | Fail        |
| 615103 | F | Oromia Re Lower Tha     | 0 | 30 | N | Fail        |
| 615283 | F | Amhara Re No Formal     | 0 | 30 | N | Fail        |
| 615300 | F | Sidamo Re Lower Tha     | 0 | 30 | N | Pass        |
| 615327 | F | South Regi Lower Tha    | 0 | 30 | N | Pass        |
| 615377 | F | South Wes Lower Tha     | 0 | 30 | N | Pass        |
| 615401 | M | Amhara Re A Level or I  | 0 | 30 | Y | Fail        |
| 615404 | F | Sidamo Re Lower Tha     | 0 | 30 | N | Fail        |
| 615425 | F | South Wes Lower Tha     | 0 | 30 | Y | Pass        |
| 615487 | F | South Regi Lower Tha    | 0 | 90 | N | Withdrawn   |
| 616338 | M | Somalia Re Lower Tha    | 0 | 30 | N | Pass        |
| 616457 | F | Somalia Re A Level or I | 0 | 30 | N | Pass        |
| 616512 | F | Addis Abat Lower Tha    | 0 | 30 | N | Pass        |
| 616595 | M | South Regi HE Qualific  | 0 | 30 | N | Pass        |
| 616629 | M | Sidamo Re A Level or I  | 0 | 30 | N | Pass        |
| 616672 | M | Addis Abat Lower Tha    | 0 | 90 | N | Pass        |
| 616706 | F | Somalia Re A Level or I | 0 | 30 | N | Distinction |
| 616727 | F | North Regi A Level or I | 0 | 30 | N | Pass        |
| 616728 | F | North Regi Lower Tha    | 0 | 30 | N | Fail        |
| 616742 | F | Addis Abat Lower Tha    | 0 | 30 | Y | Distinction |
| 616851 | F | South Regi Lower Tha    | 0 | 30 | N | Pass        |
| 616866 | F | South Wes A Level or I  | 0 | 30 | N | Pass        |
| 617107 | F | South Wes Lower Tha     | 0 | 30 | N | Fail        |
| 617114 | F | Sidamo Re A Level or I  | 0 | 30 | Y | Fail        |
| 617133 | F | South Regi Lower Tha    | 0 | 30 | Y | Fail        |
| 617238 | F | South Wes Lower Tha     | 0 | 30 | N | Fail        |
| 617346 | F | Sidamo Re Lower Tha     | 0 | 30 | N | Fail        |
| 617347 | F | Sidamo Re Lower Tha     | 0 | 30 | N | Fail        |
| 617391 | F | South Wes Lower Tha     | 0 | 30 | N | Pass        |
| 617470 | F | Addis Abat A Level or I | 0 | 30 | N | Distinction |
| 617578 | F | North Regi Lower Tha    | 0 | 30 | N | Distinction |
| 617611 | F | South Regi A Level or I | 0 | 30 | N | Fail        |
| 617700 | F | South Wes A Level or I  | 0 | 30 | N | Distinction |
| 617745 | F | Amhara Re Lower Tha     | 0 | 60 | Y | Pass        |
| 617883 | F | Addis Abat Lower Tha    | 0 | 30 | N | Fail        |
| 617886 | F | Sidamo Re Lower Tha     | 0 | 30 | N | Pass        |
| 617889 | F | South Wes Lower Tha     | 0 | 30 | N | Fail        |
| 617909 | F | Oromia Re Lower Tha     | 0 | 30 | N | Pass        |
| 618024 | F | Somalia Re Lower Tha    | 0 | 30 | N | Fail        |
| 618088 | F | Sidamo Re A Level or I  | 0 | 30 | N | Distinction |
| 618119 | F | Amhara Re A Level or I  | 0 | 30 | N | Withdrawn   |
| 618176 | F | Amhara Re Lower Tha     | 0 | 30 | N | Pass        |

|        |   |                         |   |    |   |             |
|--------|---|-------------------------|---|----|---|-------------|
| 618244 | F | Sidamo Re, A Level or I | 0 | 30 | N | Pass        |
| 618338 | M | Sidamo Re, A Level or I | 0 | 30 | N | Pass        |
| 618444 | F | South Regi HE Qualific  | 0 | 30 | N | Fail        |
| 618579 | F | South Regi Lower Tha    | 0 | 30 | Y | Pass        |
| 618580 | F | Addis Abak Lower Tha    | 0 | 30 | Y | Withdrawn   |
| 618621 | F | North Regi Lower Tha    | 0 | 30 | N | Pass        |
| 618767 | F | Addis Abak Lower Tha    | 0 | 30 | N | Pass        |
| 618846 | F | Sidamo Re, A Level or I | 0 | 30 | N | Withdrawn   |
| 618887 | M | Oromia Re A Level or I  | 0 | 30 | Y | Pass        |
| 618893 | F | Sidamo Re, Lower Tha    | 0 | 30 | Y | Distinction |
| 619013 | F | Sidamo Re, A Level or I | 0 | 30 | N | Fail        |
| 619107 | F | South Regi Lower Tha    | 0 | 30 | Y | Fail        |
| 619212 | F | Oromia Re A Level or I  | 0 | 30 | N | Pass        |
| 619284 | M | Amhara Re Lower Tha     | 0 | 30 | N | Fail        |
| 619363 | F | Sidamo Re, A Level or I | 0 | 30 | N | Pass        |
| 619478 | F | South Regi A Level or I | 0 | 30 | N | Fail        |
| 619481 | M | Sidamo Re, A Level or I | 0 | 30 | N | Pass        |
| 619483 | F | Sidamo Re, A Level or I | 0 | 30 | N | Distinction |
| 619520 | F | Oromia Re Lower Tha     | 0 | 30 | Y | Fail        |
| 619926 | F | Addis Abak Lower Tha    | 0 | 30 | N | Fail        |
| 619945 | F | Sidamo Re, A Level or I | 0 | 30 | Y | Withdrawn   |
| 619952 | F | Amhara Re Lower Tha     | 0 | 30 | Y | Pass        |
| 620179 | F | Addis Abak Lower Tha    | 0 | 30 | N | Distinction |
| 620190 | F | South Wes Lower Tha     | 0 | 30 | N | Pass        |
| 620197 | F | Somalia Re A Level or I | 0 | 30 | N | Pass        |
| 620218 | F | Sidamo Re, A Level or I | 0 | 30 | Y | Fail        |
| 620317 | F | Sidamo Re, Lower Tha    | 0 | 30 | N | Pass        |
| 620460 | F | Sidamo Re, A Level or I | 0 | 30 | N | Pass        |
| 620490 | F | Oromia Re Lower Tha     | 0 | 30 | N | Pass        |
| 620522 | M | Amhara Re Lower Tha     | 0 | 30 | N | Pass        |
| 620552 | M | Sidamo Re, A Level or I | 0 | 30 | N | Withdrawn   |
| 620561 | F | Addis Abak Lower Tha    | 0 | 30 | N | Distinction |
| 620564 | F | North Regi A Level or I | 0 | 30 | N | Pass        |
| 620590 | F | Addis Abak A Level or I | 0 | 30 | N | Pass        |
| 620629 | M | South Regi A Level or I | 0 | 60 | N | Withdrawn   |
| 620726 | F | Sidamo Re, Lower Tha    | 0 | 30 | N | Pass        |
| 620728 | F | North Regi Lower Tha    | 0 | 30 | N | Fail        |
| 620808 | F | Sidamo Re, Lower Tha    | 0 | 30 | Y | Distinction |
| 620915 | F | Amhara Re Lower Tha     | 0 | 30 | N | Withdrawn   |
| 620946 | F | Addis Abak Lower Tha    | 0 | 30 | Y | Distinction |
| 620956 | M | South Wes Lower Tha     | 0 | 30 | Y | Withdrawn   |
| 620982 | F | Somalia Re A Level or I | 0 | 30 | N | Distinction |
| 621017 | F | Sidamo Re, No Formal    | 0 | 30 | N | Fail        |
| 621025 | F | Addis Abak No Formal    | 0 | 30 | N | Fail        |
| 621319 | F | Amhara Re Lower Tha     | 0 | 30 | N | Fail        |
| 621331 | F | Addis Abak Lower Tha    | 0 | 30 | Y | Withdrawn   |
| 621342 | F | Sidamo Re, HE Qualific  | 0 | 30 | N | Fail        |

|        |   |                         |   |     |   |             |
|--------|---|-------------------------|---|-----|---|-------------|
| 621459 | F | South Wes HE Qualific   | 0 | 30  | Y | Withdrawn   |
| 621473 | F | South Regi Lower Tha    | 0 | 30  | N | Pass        |
| 621478 | M | Somalia Re Lower Tha    | 0 | 30  | N | Withdrawn   |
| 621676 | F | Somalia Re A Level or I | 0 | 30  | N | Withdrawn   |
| 621693 | F | South Wes A Level or I  | 0 | 30  | N | Fail        |
| 621716 | F | Sidamo Re Lower Tha     | 0 | 30  | N | Pass        |
| 621755 | F | Oromia Re Lower Tha     | 0 | 30  | Y | Pass        |
| 621888 | F | Addis Abak Lower Tha    | 0 | 30  | N | Fail        |
| 621923 | F | South Wes A Level or I  | 0 | 30  | N | Pass        |
| 622074 | F | Addis Abak Lower Tha    | 0 | 30  | N | Pass        |
| 622166 | F | South Regi Lower Tha    | 0 | 150 | N | Pass        |
| 622245 | F | Addis Abak HE Qualific  | 0 | 30  | N | Pass        |
| 622252 | F | Sidamo Re A Level or I  | 0 | 30  | N | Withdrawn   |
| 622352 | F | Sidamo Re Lower Tha     | 0 | 30  | N | Pass        |
| 622356 | F | South Regi A Level or I | 0 | 30  | N | Fail        |
| 622382 | F | South Regi Lower Tha    | 0 | 30  | N | Pass        |
| 622387 | F | Amhara Re Lower Tha     | 0 | 30  | Y | Withdrawn   |
| 622432 | F | Amhara Re Lower Tha     | 0 | 30  | N | Distinction |
| 622433 | F | South Regi Lower Tha    | 0 | 30  | N | Pass        |
| 622480 | F | Sidamo Re Lower Tha     | 0 | 30  | N | Fail        |
| 622482 | F | South Wes Lower Tha     | 0 | 30  | N | Withdrawn   |
| 622500 | M | Addis Abak A Level or I | 0 | 30  | Y | Distinction |
| 622516 | F | Amhara Re Lower Tha     | 0 | 30  | N | Fail        |
| 622570 | F | Addis Abak Lower Tha    | 0 | 30  | N | Pass        |
| 622618 | F | South Regi Lower Tha    | 0 | 30  | N | Fail        |
| 622646 | F | Sidamo Re Lower Tha     | 0 | 30  | Y | Fail        |
| 622886 | M | Amhara Re Lower Tha     | 0 | 30  | Y | Withdrawn   |
| 623010 | F | South Regi A Level or I | 0 | 30  | N | Pass        |
| 623029 | F | Sidamo Re No Formal     | 0 | 30  | N | Fail        |
| 623072 | F | South Regi Lower Tha    | 0 | 30  | N | Pass        |
| 623081 | F | Sidamo Re A Level or I  | 0 | 30  | N | Distinction |
| 623233 | F | Oromia Re A Level or I  | 0 | 30  | N | Withdrawn   |
| 623322 | M | Somalia Re Lower Tha    | 0 | 30  | Y | Withdrawn   |
| 623335 | F | North Regi Lower Tha    | 0 | 30  | N | Pass        |
| 623416 | F | Addis Abak Lower Tha    | 0 | 30  | N | Pass        |
| 623418 | M | Addis Abak Lower Tha    | 0 | 30  | N | Withdrawn   |
| 623442 | F | South Wes Lower Tha     | 0 | 30  | Y | Distinction |
| 623457 | F | Sidamo Re A Level or I  | 0 | 30  | N | Pass        |
| 623495 | F | South Regi Lower Tha    | 0 | 30  | N | Pass        |
| 623575 | F | South Regi Lower Tha    | 0 | 30  | N | Pass        |
| 623602 | F | North Regi A Level or I | 0 | 30  | N | Pass        |
| 623778 | F | Sidamo Re Lower Tha     | 0 | 30  | N | Distinction |
| 623804 | M | Oromia Re Lower Tha     | 0 | 30  | N | Pass        |
| 623831 | F | South Regi A Level or I | 0 | 30  | N | Distinction |
| 623859 | F | Amhara Re A Level or I  | 0 | 30  | N | Pass        |
| 623903 | F | Sidamo Re Lower Tha     | 0 | 30  | N | Pass        |
| 623909 | F | Sidamo Re Lower Tha     | 0 | 30  | N | Fail        |

|        |   |                                  |   |    |   |             |
|--------|---|----------------------------------|---|----|---|-------------|
| 623919 | F | Afar Region Lower Than           | 0 | 30 | N | Pass        |
| 623953 | F | Somalia Region Lower Than        | 0 | 30 | N | Fail        |
| 623988 | F | Addis Ababa Lower Than           | 0 | 30 | N | Pass        |
| 624099 | F | Sidamo Region A Level or Higher  | 0 | 30 | N | Withdrawn   |
| 624199 | M | Oromia Region A Level or Higher  | 0 | 30 | N | Withdrawn   |
| 624226 | F | South West A Level or Higher     | 0 | 30 | N | Distinction |
| 624230 | F | Sidamo Region Lower Than         | 0 | 30 | N | Pass        |
| 624297 | M | South Region Lower Than          | 0 | 90 | N | Withdrawn   |
| 624321 | F | Sidamo Region A Level or Higher  | 0 | 30 | N | Withdrawn   |
| 624327 | F | South Region Lower Than          | 0 | 30 | Y | Fail        |
| 624430 | F | Oromia Region A Level or Higher  | 0 | 30 | N | Fail        |
| 624433 | F | Addis Ababa A Level or Higher    | 0 | 30 | N | Pass        |
| 624455 | F | Amhara Region Lower Than         | 0 | 30 | N | Fail        |
| 624522 | F | Addis Ababa No Formal            | 0 | 30 | N | Pass        |
| 624569 | F | South Region Lower Than          | 0 | 30 | N | Fail        |
| 624650 | M | Sidamo Region Lower Than         | 0 | 30 | N | Withdrawn   |
| 624667 | F | Addis Ababa No Formal            | 0 | 30 | N | Fail        |
| 624679 | F | Addis Ababa Lower Than           | 0 | 30 | Y | Fail        |
| 624706 | F | Sidamo Region Lower Than         | 0 | 30 | N | Fail        |
| 624714 | M | Addis Ababa A Level or Higher    | 0 | 30 | N | Distinction |
| 624727 | F | South Region Lower Than          | 0 | 30 | N | Pass        |
| 624767 | F | Sidamo Region A Level or Higher  | 0 | 30 | N | Withdrawn   |
| 624777 | M | South West A Level or Higher     | 0 | 30 | N | Distinction |
| 624795 | F | North Region No Formal           | 0 | 30 | N | Fail        |
| 624828 | F | Addis Ababa Lower Than           | 0 | 30 | N | Fail        |
| 624906 | M | South Region Lower Than          | 0 | 30 | N | Pass        |
| 624912 | F | Addis Ababa Lower Than           | 0 | 30 | N | Pass        |
| 624938 | M | Sidamo Region A Level or Higher  | 0 | 30 | N | Pass        |
| 624940 | F | Somalia Region Lower Than        | 0 | 90 | N | Withdrawn   |
| 625033 | F | Sidamo Region No Formal          | 0 | 30 | N | Distinction |
| 625079 | M | South Region HE Qualification    | 0 | 90 | N | Withdrawn   |
| 625089 | F | Oromia Region Lower Than         | 0 | 30 | N | Pass        |
| 625106 | M | Oromia Region Lower Than         | 0 | 30 | N | Fail        |
| 625376 | F | South Region Lower Than          | 0 | 30 | N | Pass        |
| 625399 | M | Addis Ababa Lower Than           | 0 | 30 | N | Fail        |
| 625446 | F | South Region No Formal           | 0 | 30 | N | Pass        |
| 625494 | F | Somalia Region A Level or Higher | 0 | 30 | N | Pass        |
| 625540 | M | North Region Lower Than          | 0 | 30 | N | Fail        |
| 625544 | F | North Region Lower Than          | 0 | 30 | N | Distinction |
| 625545 | F | Oromia Region A Level or Higher  | 0 | 30 | N | Distinction |
| 625603 | F | South Region A Level or Higher   | 0 | 30 | N | Pass        |
| 625649 | F | Oromia Region Lower Than         | 0 | 30 | N | Pass        |
| 625651 | F | South Region A Level or Higher   | 0 | 30 | N | Distinction |
| 625676 | F | Somalia Region Lower Than        | 0 | 30 | N | Fail        |
| 625722 | F | Amhara Region Lower Than         | 0 | 30 | N | Pass        |
| 625775 | M | South Region Lower Than          | 0 | 30 | Y | Fail        |
| 625875 | M | Amhara Region Lower Than         | 0 | 90 | Y | Distinction |

|        |   |                         |   |    |   |             |
|--------|---|-------------------------|---|----|---|-------------|
| 625903 | M | South Regi A Level or I | 0 | 90 | N | Pass        |
| 625912 | M | Sidamo Re Lower Tha     | 0 | 30 | N | Pass        |
| 625930 | F | Somalia Re Lower Tha    | 0 | 30 | N | Withdrawn   |
| 626023 | M | South Regi A Level or I | 0 | 30 | N | Pass        |
| 626091 | F | South Regi A Level or I | 0 | 30 | N | Distinction |
| 626092 | F | South Regi Lower Tha    | 0 | 30 | N | Fail        |
| 626096 | F | South Regi Lower Tha    | 0 | 30 | N | Fail        |
| 626145 | F | Addis Abak Lower Tha    | 0 | 30 | N | Distinction |
| 626159 | F | South Wes Lower Tha     | 0 | 30 | Y | Pass        |
| 626213 | F | South Regi Lower Tha    | 0 | 30 | N | Fail        |
| 626256 | F | Sidamo Re Lower Tha     | 0 | 90 | N | Pass        |
| 626282 | F | Sidamo Re Lower Tha     | 0 | 30 | N | Distinction |
| 626287 | F | Sidamo Re Lower Tha     | 0 | 30 | N | Pass        |
| 626306 | F | Somalia Re No Formal    | 0 | 30 | N | Pass        |
| 626307 | F | South Regi Lower Tha    | 0 | 30 | Y | Withdrawn   |
| 626317 | F | South Wes Lower Tha     | 0 | 30 | Y | Fail        |
| 626372 | M | South Regi Lower Tha    | 0 | 30 | N | Pass        |
| 626379 | F | South Regi A Level or I | 0 | 30 | N | Pass        |
| 626585 | F | Sidamo Re A Level or I  | 0 | 30 | N | Pass        |
| 626589 | F | South Regi Lower Tha    | 0 | 30 | N | Pass        |
| 626618 | F | Sidamo Re Lower Tha     | 0 | 30 | N | Fail        |
| 626629 | F | Sidamo Re A Level or I  | 0 | 30 | N | Fail        |
| 626667 | F | South Regi A Level or I | 0 | 30 | N | Fail        |
| 626675 | F | Addis Abak Lower Tha    | 0 | 30 | N | Fail        |
| 626708 | F | South Wes Lower Tha     | 0 | 30 | N | Distinction |
| 626751 | M | Sidamo Re A Level or I  | 0 | 30 | N | Withdrawn   |
| 626927 | F | Addis Abak Lower Tha    | 0 | 30 | N | Withdrawn   |
| 626940 | F | Somalia Re A Level or I | 0 | 30 | N | Fail        |
| 626982 | F | Sidamo Re Lower Tha     | 0 | 30 | N | Pass        |
| 627043 | M | South Regi Lower Tha    | 0 | 30 | N | Fail        |
| 627050 | F | South Regi Lower Tha    | 0 | 30 | N | Pass        |
| 627057 | F | South Wes A Level or I  | 0 | 30 | N | Pass        |
| 627076 | F | Oromia Re Lower Tha     | 0 | 30 | Y | Fail        |
| 627217 | F | Addis Abak Lower Tha    | 0 | 30 | N | Distinction |
| 627251 | F | South Regi A Level or I | 0 | 30 | N | Pass        |
| 627264 | F | Somalia Re A Level or I | 0 | 30 | N | Distinction |
| 627327 | F | South Regi Lower Tha    | 0 | 30 | N | Pass        |
| 627330 | F | South Regi Lower Tha    | 0 | 30 | N | Pass        |
| 627441 | F | Sidamo Re A Level or I  | 0 | 30 | N | Fail        |
| 627530 | F | Amhara Re A Level or I  | 0 | 90 | N | Pass        |
| 627597 | M | North Regi A Level or I | 0 | 30 | N | Pass        |
| 627661 | F | Sidamo Re A Level or I  | 0 | 30 | N | Pass        |
| 627764 | F | Addis Abak Lower Tha    | 0 | 30 | Y | Pass        |
| 627773 | F | South Wes Lower Tha     | 0 | 30 | N | Distinction |
| 627787 | F | South Wes Lower Tha     | 0 | 30 | N | Pass        |
| 627812 | F | Sidamo Re Lower Tha     | 0 | 30 | N | Withdrawn   |
| 627821 | F | South Regi A Level or I | 0 | 30 | N | Distinction |



|        |   |                       |   |    |   |             |
|--------|---|-----------------------|---|----|---|-------------|
| 627827 | F | Sidamo Re, Lower Than | 0 | 30 | N | Fail        |
| 627834 | F | Addis Abak A Level or | 0 | 30 | Y | Distinction |
| 627843 | F | Amhara Re Lower Than  | 0 | 30 | N | Withdrawn   |
| 627895 | F | Oromia Re Lower Than  | 0 | 30 | N | Pass        |
| 627901 | F | Addis Abak Lower Than | 0 | 30 | N | Pass        |
| 627973 | F | South Wes A Level or  | 0 | 30 | N | Fail        |
| 628189 | M | Oromia Re Lower Than  | 0 | 90 | N | Fail        |
| 628217 | F | Sidamo Re, A Level or | 0 | 30 | N | Fail        |
| 628227 | F | South Regi Lower Than | 0 | 30 | N | Pass        |
| 628245 | M | Sidamo Re, Lower Than | 0 | 30 | N | Fail        |
| 628280 | F | Sidamo Re, Lower Than | 0 | 30 | N | Pass        |
| 628316 | F | Oromia Re Lower Than  | 0 | 30 | N | Distinction |
| 628365 | F | South Regi Lower Than | 0 | 30 | N | Fail        |
| 628367 | F | Amhara Re Lower Than  | 0 | 30 | N | Pass        |
| 628369 | F | Amhara Re A Level or  | 0 | 30 | N | Pass        |
| 628455 | F | Sidamo Re, Lower Than | 0 | 30 | N | Pass        |
| 628495 | M | South Wes Lower Than  | 0 | 30 | N | Pass        |
| 628530 | F | Somalia Re Lower Than | 0 | 30 | N | Pass        |
| 628538 | F | Addis Abak Lower Than | 0 | 30 | N | Fail        |
| 628545 | F | South Regi A Level or | 0 | 30 | N | Distinction |
| 628598 | F | South Regi A Level or | 0 | 60 | N | Pass        |
| 628630 | F | Sidamo Re, Lower Than | 0 | 30 | N | Pass        |
| 628653 | F | Somalia Re Lower Than | 0 | 30 | N | Fail        |
| 628669 | F | Amhara Re A Level or  | 0 | 30 | N | Pass        |
| 628712 | F | Amhara Re A Level or  | 0 | 30 | N | Distinction |
| 628715 | F | Somalia Re Lower Than | 0 | 30 | N | Withdrawn   |
| 628722 | M | Sidamo Re, A Level or | 0 | 30 | Y | Fail        |
| 628759 | F | Addis Abak A Level or | 0 | 30 | N | Fail        |
| 628849 | F | Addis Abak A Level or | 0 | 90 | N | Fail        |
| 628851 | F | Sidamo Re, Lower Than | 0 | 30 | N | Fail        |
| 628869 | M | Oromia Re A Level or  | 0 | 30 | N | Distinction |
| 628870 | M | Addis Abak A Level or | 0 | 30 | Y | Pass        |
| 628881 | F | Addis Abak Lower Than | 0 | 30 | N | Distinction |
| 628929 | F | South Wes A Level or  | 0 | 30 | N | Pass        |
| 628931 | F | South Regi Lower Than | 0 | 30 | N | Pass        |
| 629153 | F | South Regi Lower Than | 0 | 60 | N | Pass        |
| 629198 | M | Oromia Re A Level or  | 0 | 30 | N | Distinction |
| 629310 | F | South Regi A Level or | 0 | 30 | Y | Fail        |
| 629387 | F | Sidamo Re, No Formal  | 0 | 30 | N | Withdrawn   |
| 629514 | F | South Regi Lower Than | 0 | 30 | N | Fail        |
| 629537 | F | Sidamo Re, A Level or | 0 | 30 | N | Fail        |
| 629542 | M | Sidamo Re, Lower Than | 0 | 30 | N | Fail        |
| 629580 | F | Amhara Re Lower Than  | 0 | 30 | N | Fail        |
| 629633 | F | Sidamo Re, Lower Than | 0 | 30 | Y | Distinction |
| 629736 | M | Amhara Re A Level or  | 0 | 90 | N | Pass        |
| 629745 | F | South Regi Lower Than | 0 | 30 | N | Fail        |
| 629772 | M | Sidamo Re, Lower Than | 0 | 30 | N | Pass        |

|        |   |                         |   |    |   |             |
|--------|---|-------------------------|---|----|---|-------------|
| 629777 | F | Sidamo Re, Lower Tha    | 0 | 30 | N | Pass        |
| 629779 | M | South Wes Lower Tha     | 0 | 30 | N | Pass        |
| 629813 | F | Addis Abak Lower Tha    | 0 | 30 | N | Fail        |
| 629820 | M | South Wes A Level or I  | 0 | 30 | N | Distinction |
| 629853 | F | South Regi Lower Tha    | 0 | 30 | N | Pass        |
| 629960 | F | Addis Abak A Level or I | 0 | 30 | N | Fail        |
| 629961 | F | Sidamo Re, HE Qualific  | 0 | 30 | N | Fail        |
| 629963 | M | Sidamo Re, Lower Tha    | 0 | 60 | N | Fail        |
| 629978 | F | Oromia Re Lower Tha     | 0 | 30 | N | Fail        |
| 629990 | M | South Regi Lower Tha    | 0 | 30 | N | Fail        |
| 630008 | F | Somalia Re A Level or I | 0 | 30 | N | Fail        |
| 630099 | F | Addis Abak Lower Tha    | 0 | 30 | N | Pass        |
| 630108 | F | Sidamo Re, HE Qualific  | 0 | 30 | N | Pass        |
| 630133 | F | South Regi Lower Tha    | 0 | 30 | N | Fail        |
| 630149 | F | South Regi Lower Tha    | 0 | 30 | N | Fail        |
| 630156 | F | Oromia Re Lower Tha     | 0 | 30 | N | Fail        |
| 630169 | F | Amhara Re Lower Tha     | 0 | 30 | Y | Fail        |
| 630203 | F | Oromia Re Lower Tha     | 0 | 30 | N | Withdrawn   |
| 630219 | M | Addis Abak A Level or I | 0 | 30 | N | Pass        |
| 630221 | F | South Regi A Level or I | 0 | 30 | N | Pass        |
| 630240 | M | Amhara Re Lower Tha     | 0 | 30 | N | Withdrawn   |
| 630242 | F | Somalia Re Lower Tha    | 0 | 30 | N | Fail        |
| 630446 | F | South Regi Lower Tha    | 0 | 30 | N | Pass        |
| 630496 | M | Somalia Re Lower Tha    | 0 | 30 | N | Pass        |
| 630522 | F | Addis Abak Lower Tha    | 0 | 30 | N | Pass        |
| 630538 | F | South Wes Lower Tha     | 0 | 90 | N | Withdrawn   |
| 630569 | F | North Regi Lower Tha    | 0 | 30 | N | Pass        |
| 630571 | F | Sidamo Re, Lower Tha    | 0 | 30 | N | Withdrawn   |
| 630762 | F | South Regi Lower Tha    | 0 | 30 | Y | Fail        |
| 630770 | F | Sidamo Re, Lower Tha    | 0 | 30 | N | Distinction |
| 630776 | F | Sidamo Re, Lower Tha    | 0 | 30 | N | Withdrawn   |
| 630787 | F | Oromia Re Lower Tha     | 0 | 30 | Y | Pass        |
| 630788 | F | Sidamo Re, Lower Tha    | 0 | 30 | N | Pass        |
| 630834 | F | South Regi A Level or I | 0 | 30 | N | Pass        |
| 630841 | F | Amhara Re A Level or I  | 0 | 30 | N | Pass        |
| 630863 | F | Amhara Re Lower Tha     | 0 | 30 | N | Pass        |
| 630881 | F | Addis Abak Lower Tha    | 0 | 30 | N | Pass        |
| 630946 | F | Somalia Re Lower Tha    | 0 | 30 | N | Pass        |
| 631033 | F | Sidamo Re, Lower Tha    | 0 | 30 | N | Pass        |
| 631189 | M | Somalia Re Lower Tha    | 0 | 30 | N | Fail        |
| 631201 | F | South Regi A Level or I | 0 | 30 | N | Pass        |
| 631212 | F | South Regi Lower Tha    | 0 | 30 | N | Withdrawn   |
| 631277 | F | Oromia Re Lower Tha     | 0 | 30 | N | Pass        |
| 631290 | F | Sidamo Re, A Level or I | 0 | 30 | N | Distinction |
| 631392 | F | South Regi Lower Tha    | 0 | 30 | N | Distinction |
| 631446 | F | Addis Abak HE Qualific  | 0 | 30 | N | Withdrawn   |
| 631454 | M | Addis Abak A Level or I | 0 | 30 | Y | Distinction |

|        |   |                         |   |    |   |             |
|--------|---|-------------------------|---|----|---|-------------|
| 631542 | M | Amhara Re A Level or I  | 0 | 30 | Y | Pass        |
| 631554 | F | Oromia Re A Level or I  | 0 | 30 | N | Withdrawn   |
| 631693 | F | Sidamo Re Lower Tha     | 0 | 30 | N | Fail        |
| 631753 | F | Addis Abak A Level or I | 0 | 30 | Y | Pass        |
| 631756 | M | Sidamo Re Lower Tha     | 0 | 30 | Y | Fail        |
| 631786 | F | Addis Abak A Level or I | 0 | 30 | Y | Pass        |
| 631788 | F | Amhara Re Lower Tha     | 0 | 30 | N | Withdrawn   |
| 631935 | F | Sidamo Re Lower Tha     | 0 | 30 | N | Pass        |
| 631953 | F | Sidamo Re Lower Tha     | 0 | 30 | N | Pass        |
| 631978 | F | Sidamo Re Lower Tha     | 0 | 30 | N | Fail        |
| 631992 | M | South Regi Lower Tha    | 0 | 30 | N | Withdrawn   |
| 632152 | F | Sidamo Re Lower Tha     | 0 | 30 | N | Withdrawn   |
| 632153 | F | South Regi Lower Tha    | 0 | 30 | N | Pass        |
| 632210 | M | Sidamo Re Lower Tha     | 0 | 30 | N | Fail        |
| 632267 | F | Somalia Re Lower Tha    | 0 | 30 | N | Withdrawn   |
| 632475 | F | Oromia Re Lower Tha     | 0 | 30 | N | Pass        |
| 632483 | F | Sidamo Re A Level or I  | 0 | 30 | N | Pass        |
| 632485 | M | Sidamo Re Lower Tha     | 0 | 60 | N | Pass        |
| 632512 | M | South Wes Lower Tha     | 0 | 30 | N | Pass        |
| 632514 | F | Somalia Re Lower Tha    | 0 | 30 | N | Distinction |
| 632526 | F | Addis Abak Lower Tha    | 0 | 30 | N | Pass        |
| 632533 | F | Sidamo Re Lower Tha     | 0 | 30 | N | Withdrawn   |
| 632543 | F | Addis Abak HE Qualific  | 0 | 30 | N | Distinction |
| 632558 | F | Oromia Re Lower Tha     | 0 | 30 | N | Fail        |
| 632559 | F | Sidamo Re A Level or I  | 0 | 30 | N | Pass        |
| 632569 | F | South Regi A Level or I | 0 | 30 | N | Distinction |
| 632577 | F | Sidamo Re Lower Tha     | 0 | 30 | N | Fail        |
| 632613 | F | Addis Abak Lower Tha    | 0 | 30 | N | Fail        |
| 632619 | F | Sidamo Re Lower Tha     | 0 | 30 | N | Pass        |
| 632631 | M | Oromia Re Lower Tha     | 0 | 30 | N | Fail        |
| 632633 | M | North Regi A Level or I | 0 | 30 | N | Withdrawn   |
| 632638 | F | Somalia Re A Level or I | 0 | 30 | N | Fail        |
| 632640 | F | South Wes Lower Tha     | 0 | 30 | N | Pass        |
| 632667 | M | Addis Abak Lower Tha    | 0 | 30 | Y | Pass        |
| 632673 | F | North Regi A Level or I | 0 | 30 | N | Pass        |
| 632675 | F | Oromia Re Lower Tha     | 0 | 30 | Y | Pass        |
| 632687 | F | North Regi No Formal    | 0 | 30 | N | Pass        |
| 632936 | M | Sidamo Re Lower Tha     | 0 | 30 | N | Pass        |
| 632959 | M | North Regi Lower Tha    | 0 | 30 | N | Distinction |
| 632966 | F | Oromia Re Lower Tha     | 0 | 30 | N | Withdrawn   |
| 632989 | F | Sidamo Re Lower Tha     | 0 | 30 | N | Pass        |
| 633026 | M | South Wes A Level or I  | 0 | 30 | N | Withdrawn   |
| 633096 | F | Amhara Re Lower Tha     | 0 | 30 | N | Fail        |
| 633098 | F | South Regi Lower Tha    | 0 | 30 | N | Pass        |
| 633118 | F | South Regi Lower Tha    | 0 | 30 | N | Pass        |
| 633123 | F | Sidamo Re A Level or I  | 0 | 30 | Y | Pass        |
| 633209 | F | Addis Abak Lower Tha    | 0 | 30 | N | Pass        |

|        |   |                          |   |    |   |             |
|--------|---|--------------------------|---|----|---|-------------|
| 633285 | F | Somalia Re A Level or I  | 0 | 90 | Y | Fail        |
| 633389 | F | Sidamo Re A Level or I   | 0 | 30 | Y | Fail        |
| 633417 | M | Sidamo Re A Level or I   | 0 | 30 | N | Pass        |
| 633429 | M | Somalia Re Lower Than    | 0 | 30 | N | Pass        |
| 633435 | M | Sidamo Re A Level or I   | 0 | 30 | N | Fail        |
| 633436 | F | Oromia Re Lower Than     | 0 | 30 | N | Fail        |
| 633448 | F | Sidamo Re A Level or I   | 0 | 30 | N | Fail        |
| 633453 | F | South Wes HE Qualific    | 0 | 30 | N | Distinction |
| 633459 | F | South Regi A Level or I  | 0 | 30 | N | Pass        |
| 633464 | M | Oromia Re Lower Than     | 0 | 30 | N | Distinction |
| 633474 | M | Addis Abak Lower Than    | 0 | 30 | N | Distinction |
| 633498 | F | South Regi A Level or I  | 0 | 30 | N | Fail        |
| 633514 | F | South Regi A Level or I  | 0 | 30 | N | Pass        |
| 633515 | F | Sidamo Re Lower Than     | 0 | 30 | N | Fail        |
| 633569 | F | Addis Abak Lower Than    | 0 | 30 | N | Fail        |
| 633585 | F | Afar Region A Level or I | 0 | 30 | N | Fail        |
| 633588 | F | Oromia Re HE Qualific    | 0 | 30 | N | Pass        |
| 633608 | F | Somalia Re Lower Than    | 0 | 30 | N | Distinction |
| 633609 | F | Sidamo Re Lower Than     | 0 | 30 | N | Pass        |
| 633643 | F | Somalia Re A Level or I  | 0 | 30 | N | Pass        |
| 633660 | F | Amhara Re Lower Than     | 0 | 30 | N | Pass        |
| 633666 | F | Amhara Re Lower Than     | 0 | 30 | N | Pass        |
| 633682 | F | Amhara Re Lower Than     | 0 | 30 | N | Pass        |
| 633683 | M | Somalia Re A Level or I  | 0 | 30 | Y | Pass        |
| 633685 | F | Sidamo Re A Level or I   | 0 | 30 | N | Pass        |
| 633690 | F | South Regi Lower Than    | 0 | 30 | N | Pass        |
| 633747 | F | South Regi Lower Than    | 0 | 30 | N | Pass        |
| 633749 | M | South Regi Lower Than    | 0 | 30 | N | Fail        |
| 633923 | F | Sidamo Re A Level or I   | 0 | 30 | N | Pass        |
| 633956 | F | Addis Abak A Level or I  | 0 | 30 | N | Distinction |
| 633967 | F | North Regi Lower Than    | 0 | 30 | N | Fail        |
| 633979 | F | Oromia Re Lower Than     | 0 | 30 | N | Distinction |
| 634018 | M | Oromia Re Lower Than     | 0 | 30 | N | Pass        |
| 634027 | M | Sidamo Re A Level or I   | 0 | 30 | N | Pass        |
| 634054 | M | Addis Abak A Level or I  | 0 | 30 | N | Fail        |
| 634061 | F | Sidamo Re A Level or I   | 0 | 30 | N | Distinction |
| 634066 | M | Sidamo Re A Level or I   | 0 | 30 | N | Fail        |
| 634076 | F | Addis Abak HE Qualific   | 0 | 30 | N | Distinction |
| 634234 | M | Somalia Re Lower Than    | 0 | 30 | N | Distinction |
| 634258 | F | South Regi A Level or I  | 0 | 30 | N | Distinction |
| 634273 | F | South Regi Lower Than    | 0 | 30 | N | Fail        |
| 634311 | F | Addis Abak Lower Than    | 0 | 30 | N | Fail        |
| 634316 | F | North Regi Lower Than    | 0 | 30 | N | Pass        |
| 634320 | F | Amhara Re Lower Than     | 0 | 30 | Y | Pass        |
| 634323 | F | Oromia Re Lower Than     | 0 | 30 | N | Distinction |
| 634340 | M | Sidamo Re A Level or I   | 0 | 30 | N | Fail        |
| 634344 | M | Sidamo Re Lower Than     | 0 | 30 | Y | Fail        |

|         |   |                         |   |    |   |             |
|---------|---|-------------------------|---|----|---|-------------|
| 634345  | M | Addis Abat HE Qualific  | 0 | 30 | N | Fail        |
| 634347  | F | North Regi Lower Tha    | 0 | 30 | N | Withdrawn   |
| 634369  | F | Sidamo Re Lower Tha     | 0 | 30 | N | Pass        |
| 634404  | F | Oromia Re Lower Tha     | 0 | 30 | N | Distinction |
| 634444  | F | Sidamo Re Lower Tha     | 0 | 30 | N | Fail        |
| 634461  | F | Somalia Re Lower Tha    | 0 | 30 | Y | Fail        |
| 634470  | F | South Regi A Level or I | 0 | 30 | N | Distinction |
| 634494  | F | South Wes Lower Tha     | 0 | 30 | N | Fail        |
| 634498  | F | Sidamo Re A Level or I  | 0 | 30 | N | Fail        |
| 634503  | F | South Regi Lower Tha    | 0 | 30 | N | Pass        |
| 634529  | M | Amhara Re Lower Tha     | 0 | 30 | N | Distinction |
| 634530  | F | Somalia Re Lower Tha    | 0 | 30 | N | Pass        |
| 634547  | F | South Wes A Level or I  | 0 | 30 | N | Pass        |
| 634551  | F | South Regi A Level or I | 0 | 30 | N | Pass        |
| 634562  | F | Sidamo Re A Level or I  | 0 | 30 | N | Fail        |
| 634569  | F | Sidamo Re Lower Tha     | 0 | 30 | N | Pass        |
| 634583  | F | Addis Abak A Level or I | 0 | 30 | N | Pass        |
| 634746  | M | Sidamo Re Lower Tha     | 0 | 30 | N | Pass        |
| 634751  | F | South Wes Lower Tha     | 0 | 30 | N | Distinction |
| 634789  | F | Oromia Re A Level or I  | 0 | 30 | N | Withdrawn   |
| 634822  | F | South Regi Lower Tha    | 0 | 30 | N | Fail        |
| 634848  | F | Somalia Re Lower Tha    | 0 | 30 | N | Fail        |
| 634899  | F | Addis Abak Lower Tha    | 0 | 30 | Y | Fail        |
| 634933  | F | South Regi Lower Tha    | 0 | 30 | N | Fail        |
| 634968  | F | Oromia Re Lower Tha     | 0 | 30 | N | Fail        |
| 634986  | F | Somalia Re A Level or I | 0 | 30 | N | Pass        |
| 635017  | M | Sidamo Re Lower Tha     | 0 | 60 | N | Withdrawn   |
| 635035  | F | South Regi A Level or I | 0 | 30 | N | Pass        |
| 635052  | F | Amhara Re A Level or I  | 0 | 30 | N | Pass        |
| 635233  | M | Amhara Re A Level or I  | 0 | 30 | N | Distinction |
| 635506  | F | Sidamo Re A Level or I  | 0 | 30 | N | Pass        |
| 635813  | F | South Regi Lower Tha    | 0 | 30 | N | Pass        |
| 635885  | M | South Regi Lower Tha    | 0 | 30 | N | Fail        |
| 1338955 | F | Sidamo Re A Level or I  | 0 | 30 | N | Withdrawn   |
| 1413027 | F | Addis Abak Lower Tha    | 0 | 30 | N | Pass        |
| 1422737 | F | South Wes Lower Tha     | 0 | 30 | N | Pass        |
| 1860171 | M | Addis Abak HE Qualific  | 0 | 30 | N | Distinction |
| 1882021 | F | Somalia Re Lower Tha    | 0 | 30 | N | Pass        |
| 1897611 | F | Addis Abak Lower Tha    | 0 | 30 | N | Distinction |
| 1986312 | F | Oromia Re A Level or I  | 0 | 30 | Y | Withdrawn   |
| 1994632 | F | South Regi Lower Tha    | 0 | 30 | Y | Pass        |
| 2011327 | F | Sidamo Re A Level or I  | 0 | 30 | N | Withdrawn   |
| 2067555 | F | Amhara Re Lower Tha     | 0 | 30 | N | Distinction |
| 2081937 | F | Amhara Re A Level or I  | 0 | 30 | N | Distinction |
| 2082945 | F | Addis Abak A Level or I | 0 | 30 | N | Pass        |
| 2135315 | F | Sidamo Re A Level or I  | 0 | 30 | N | Pass        |
| 2237813 | F | Sidamo Re A Level or I  | 0 | 30 | N | Fail        |

|         |   |                         |   |     |   |             |
|---------|---|-------------------------|---|-----|---|-------------|
| 2252963 | F | Amhara Re Lower Tha     | 0 | 30  | N | Pass        |
| 2262510 | F | Sidamo Re, A Level or I | 0 | 30  | Y | Distinction |
| 2264282 | F | Somalia Re Lower Tha    | 0 | 30  | N | Withdrawn   |
| 2272474 | F | Sidamo Re, A Level or I | 0 | 30  | N | Pass        |
| 2322120 | F | Sidamo Re, HE Qualific  | 0 | 30  | N | Fail        |
| 2351589 | F | Oromia Re HE Qualific   | 0 | 30  | N | Distinction |
| 2392554 | M | Somalia Re Lower Tha    | 0 | 30  | Y | Pass        |
| 2410140 | F | Amhara Re A Level or I  | 0 | 30  | N | Withdrawn   |
| 2445562 | M | Amhara Re A Level or I  | 0 | 120 | Y | Pass        |
| 2452045 | M | Sidamo Re, A Level or I | 0 | 30  | N | Pass        |
| 2477545 | F | South Wes Lower Tha     | 0 | 30  | Y | Withdrawn   |
| 2526485 | F | South Regi A Level or I | 0 | 30  | N | Pass        |
| 2533407 | F | Somalia Re HE Qualific  | 0 | 30  | N | Pass        |
| 2546763 | F | Amhara Re A Level or I  | 0 | 30  | Y | Fail        |
| 2563715 | F | Sidamo Re, A Level or I | 0 | 30  | N | Pass        |
| 2574822 | F | Sidamo Re, A Level or I | 0 | 30  | N | Withdrawn   |
| 2574825 | F | South Regi Lower Tha    | 0 | 30  | N | Fail        |
| 2577437 | F | Somalia Re Lower Tha    | 0 | 30  | N | Withdrawn   |
| 2619903 | F | Sidamo Re, Lower Tha    | 0 | 30  | N | Fail        |
| 2649914 | F | Amhara Re A Level or I  | 0 | 30  | N | Distinction |
| 2658277 | F | Oromia Re A Level or I  | 0 | 30  | N | Fail        |
| 2672138 | F | Amhara Re Lower Tha     | 0 | 30  | Y | Distinction |
| 2677135 | M | Sidamo Re, Lower Tha    | 0 | 30  | N | Pass        |
| 2682002 | F | Sidamo Re, Lower Tha    | 0 | 30  | N | Distinction |
| 2689480 | F | North Regi A Level or I | 0 | 30  | N | Pass        |
| 2695362 | F | Somalia Re A Level or I | 0 | 30  | N | Distinction |
| 31205   | M | Somalia Re Lower Tha    | 0 | 30  | Y | Fail        |
| 52702   | F | Afar Regioi Lower Tha   | 0 | 30  | N | Pass        |
| 60162   | F | Sidamo Re, A Level or I | 0 | 30  | N | Pass        |
| 63949   | F | South Wes Lower Tha     | 0 | 30  | N | Pass        |
| 91041   | F | Sidamo Re, Lower Tha    | 0 | 30  | N | Withdrawn   |
| 92103   | F | South Regi A Level or I | 0 | 30  | N | Withdrawn   |
| 121182  | M | Amhara Re A Level or I  | 0 | 30  | N | Distinction |
| 125407  | F | Addis Abak Lower Tha    | 0 | 30  | Y | Pass        |
| 131314  | M | South Regi A Level or I | 0 | 30  | N | Pass        |
| 132932  | F | South Wes Lower Tha     | 0 | 30  | Y | Pass        |
| 140938  | F | South Wes A Level or I  | 0 | 90  | N | Withdrawn   |
| 141827  | M | South Wes Lower Tha     | 0 | 30  | Y | Pass        |
| 181251  | F | South Regi Lower Tha    | 0 | 30  | N | Fail        |
| 198167  | F | Addis Abak A Level or I | 0 | 30  | N | Pass        |
| 226879  | F | Afar Regioi HE Qualific | 0 | 30  | N | Distinction |
| 226890  | M | South Wes A Level or I  | 0 | 30  | N | Pass        |
| 232480  | F | Sidamo Re, Lower Tha    | 0 | 30  | N | Fail        |
| 237921  | F | Sidamo Re, Lower Tha    | 0 | 30  | N | Distinction |
| 239751  | F | Somalia Re Lower Tha    | 1 | 30  | N | Pass        |
| 260951  | F | Addis Abak No Formal    | 0 | 30  | N | Fail        |
| 263341  | M | Amhara Re Lower Tha     | 0 | 30  | N | Pass        |

|        |   |                            |   |     |   |             |
|--------|---|----------------------------|---|-----|---|-------------|
| 275136 | M | South Wes Lower Thai       | 0 | 30  | Y | Pass        |
| 276893 | F | South Wes A Level or I     | 0 | 30  | Y | Pass        |
| 290854 | F | Afar Region A Level or I   | 0 | 30  | N | Pass        |
| 291937 | F | Tigray Region HE Qualific  | 0 | 30  | N | Fail        |
| 302145 | F | Amhara Region Lower Thai   | 0 | 30  | Y | Pass        |
| 302522 | F | Addis Ababa Lower Thai     | 0 | 90  | N | Fail        |
| 308807 | M | Addis Ababa A Level or I   | 0 | 120 | N | Pass        |
| 313925 | F | North Region A Level or I  | 0 | 30  | N | Distinction |
| 317399 | M | South Region Lower Thai    | 0 | 30  | Y | Fail        |
| 323940 | F | Oromia Region Lower Thai   | 0 | 30  | N | Distinction |
| 330682 | F | Addis Ababa Lower Thai     | 0 | 30  | N | Pass        |
| 338113 | F | Sidamo Region Lower Thai   | 0 | 30  | N | Pass        |
| 339645 | F | Somalia Region Lower Thai  | 0 | 30  | N | Pass        |
| 340242 | F | Somalia Region Lower Thai  | 0 | 30  | N | Pass        |
| 342466 | M | Sidamo Region Lower Thai   | 0 | 30  | N | Fail        |
| 342946 | F | South Region Lower Thai    | 0 | 30  | N | Fail        |
| 343655 | F | South Region Lower Thai    | 0 | 30  | N | Fail        |
| 348837 | F | Addis Ababa A Level or I   | 0 | 30  | N | Distinction |
| 350944 | M | Amhara Region Lower Thai   | 0 | 30  | Y | Fail        |
| 358341 | F | Tigray Region A Level or I | 0 | 30  | N | Pass        |
| 358966 | F | South Wes Lower Thai       | 0 | 30  | Y | Distinction |
| 370129 | F | Afar Region HE Qualific    | 0 | 30  | N | Withdrawn   |
| 371402 | F | Somalia Region Lower Thai  | 0 | 30  | N | Pass        |
| 372141 | F | Oromia Region A Level or I | 0 | 30  | N | Pass        |
| 378969 | F | Sidamo Region A Level or I | 0 | 30  | N | Withdrawn   |
| 380599 | F | Amhara Region Lower Thai   | 0 | 30  | N | Pass        |
| 380668 | F | Oromia Region Lower Thai   | 0 | 30  | N | Pass        |
| 383608 | M | Sidamo Region Lower Thai   | 0 | 30  | N | Withdrawn   |
| 386180 | F | Addis Ababa Lower Thai     | 0 | 30  | N | Pass        |
| 387446 | F | Addis Ababa A Level or I   | 0 | 30  | N | Pass        |
| 388259 | F | Sidamo Region A Level or I | 0 | 30  | N | Fail        |
| 396532 | F | Tigray Region Lower Thai   | 0 | 30  | Y | Fail        |
| 402596 | F | Somalia Region Lower Thai  | 0 | 60  | N | Withdrawn   |
| 410043 | F | Sidamo Region Post Gradu   | 0 | 30  | N | Fail        |
| 414633 | F | Sidamo Region A Level or I | 0 | 30  | N | Pass        |
| 415307 | F | South Wes Lower Thai       | 0 | 30  | Y | Fail        |
| 416700 | M | Somalia Region Lower Thai  | 0 | 30  | N | Distinction |
| 423093 | F | Amhara Region Lower Thai   | 0 | 30  | N | Pass        |
| 429004 | M | South Region A Level or I  | 0 | 30  | N | Pass        |
| 439170 | M | Oromia Region Lower Thai   | 0 | 30  | Y | Distinction |
| 442987 | F | Somalia Region Lower Thai  | 0 | 30  | N | Pass        |
| 443765 | F | Somalia Region Lower Thai  | 0 | 30  | N | Pass        |
| 465567 | M | Sidamo Region Lower Thai   | 0 | 30  | N | Fail        |
| 465952 | M | South Wes Lower Thai       | 0 | 30  | N | Pass        |
| 470187 | F | Somalia Region Lower Thai  | 0 | 30  | N | Pass        |
| 470900 | F | Sidamo Region Lower Thai   | 2 | 30  | N | Pass        |
| 472049 | F | Amhara Region Lower Thai   | 0 | 60  | N | Withdrawn   |

|        |   |                             |   |     |   |             |
|--------|---|-----------------------------|---|-----|---|-------------|
| 478886 | F | Tigrai Region Lower Th      | 0 | 30  | N | Distinction |
| 480914 | F | Addis Abak No Formal        | 0 | 30  | N | Withdrawn   |
| 498564 | F | Amhara Region Lower Th      | 0 | 30  | Y | Fail        |
| 499187 | F | Oromia Region A Level or I  | 0 | 30  | N | Pass        |
| 500915 | F | South West Lower Th         | 0 | 30  | Y | Withdrawn   |
| 501888 | F | South West Lower Th         | 0 | 30  | Y | Distinction |
| 505216 | F | South Region A Level or I   | 1 | 30  | N | Pass        |
| 505762 | F | South West A Level or I     | 0 | 30  | N | Distinction |
| 506205 | M | Addis Abak A Level or I     | 0 | 30  | N | Pass        |
| 513166 | F | Oromia Region Lower Th      | 0 | 30  | Y | Distinction |
| 514648 | F | South Region Lower Th       | 0 | 30  | N | Distinction |
| 515345 | F | Oromia Region Lower Th      | 0 | 30  | N | Fail        |
| 517263 | M | South Region A Level or I   | 0 | 30  | N | Pass        |
| 521631 | F | South Region Lower Th       | 0 | 30  | N | Pass        |
| 527039 | F | South Region Lower Th       | 0 | 30  | Y | Fail        |
| 527538 | F | Tigrai Region A Level or I  | 0 | 30  | N | Distinction |
| 532862 | F | Oromia Region Lower Th      | 0 | 60  | N | Fail        |
| 534672 | F | South Region A Level or I   | 0 | 30  | N | Pass        |
| 537115 | F | Amhara Region A Level or I  | 0 | 30  | N | Fail        |
| 541774 | F | Tigrai Region Lower Th      | 0 | 30  | N | Fail        |
| 546286 | M | Sidamo Region A Level or I  | 0 | 60  | N | Distinction |
| 546724 | F | Sidamo Region Lower Th      | 2 | 30  | N | Pass        |
| 547334 | F | Addis Abak HE Qualific      | 0 | 30  | N | Fail        |
| 554580 | M | Sidamo Region Lower Th      | 1 | 60  | Y | Pass        |
| 558486 | F | South West A Level or I     | 0 | 30  | N | Pass        |
| 559366 | F | South Region HE Qualific    | 0 | 30  | N | Fail        |
| 559766 | M | Sidamo Region Lower Th      | 0 | 30  | N | Fail        |
| 560643 | F | Addis Abak Lower Th         | 0 | 30  | Y | Fail        |
| 561419 | F | Sidamo Region Lower Th      | 1 | 30  | N | Pass        |
| 566512 | F | Sidamo Region Lower Th      | 0 | 30  | N | Pass        |
| 568852 | F | South Region Lower Th       | 0 | 120 | N | Fail        |
| 569374 | F | Sidamo Region Lower Th      | 0 | 30  | N | Fail        |
| 569672 | M | Addis Abak Lower Th         | 0 | 30  | N | Pass        |
| 571583 | M | Sidamo Region Lower Th      | 0 | 30  | N | Distinction |
| 572471 | F | South Region Lower Th       | 0 | 30  | N | Pass        |
| 573054 | F | Amhara Region Lower Th      | 0 | 30  | N | Pass        |
| 573320 | F | Oromia Region Lower Th      | 0 | 30  | N | Fail        |
| 574642 | F | South Region A Level or I   | 1 | 30  | N | Withdrawn   |
| 578797 | F | Somalia Region A Level or I | 0 | 30  | N | Distinction |
| 579125 | F | Amhara Region Lower Th      | 0 | 30  | N | Pass        |
| 580717 | F | South Region Lower Th       | 0 | 150 | N | Withdrawn   |
| 581957 | F | Amhara Region Lower Th      | 0 | 30  | N | Fail        |
| 584099 | F | Somalia Region Lower Th     | 0 | 30  | N | Pass        |
| 586371 | F | South Region Lower Th       | 0 | 30  | N | Pass        |
| 586861 | F | Afar Region Lower Th        | 0 | 90  | N | Withdrawn   |
| 587909 | F | Sidamo Region Lower Th      | 0 | 30  | Y | Pass        |
| 589562 | M | Sidamo Region No Formal     | 0 | 30  | N | Distinction |



|        |   |                         |   |    |   |             |
|--------|---|-------------------------|---|----|---|-------------|
| 591755 | F | South Wes A Level or I  | 0 | 30 | N | Pass        |
| 593658 | F | South Regi No Formal    | 2 | 30 | N | Pass        |
| 595041 | F | Amhara Re A Level or I  | 1 | 30 | N | Withdrawn   |
| 595941 | F | Oromia Re Lower Tha     | 1 | 30 | Y | Pass        |
| 599282 | F | Sidamo Re Lower Tha     | 0 | 30 | N | Pass        |
| 600320 | F | South Regi Lower Tha    | 1 | 30 | Y | Pass        |
| 602360 | F | Sidamo Re A Level or I  | 2 | 30 | N | Fail        |
| 603585 | M | South Regi Lower Tha    | 1 | 30 | N | Fail        |
| 604061 | F | Addis Abak Lower Tha    | 1 | 30 | N | Fail        |
| 606856 | F | Oromia Re Lower Tha     | 0 | 30 | N | Withdrawn   |
| 607342 | F | Addis Abak Lower Tha    | 0 | 30 | N | Distinction |
| 607387 | F | Oromia Re Lower Tha     | 1 | 30 | N | Distinction |
| 608536 | F | Addis Abak Lower Tha    | 0 | 30 | N | Pass        |
| 609257 | F | South Regi Lower Tha    | 0 | 30 | Y | Distinction |
| 609427 | F | Somalia Re A Level or I | 0 | 30 | N | Fail        |
| 610302 | F | South Regi Lower Tha    | 0 | 90 | N | Distinction |
| 611967 | F | Oromia Re A Level or I  | 0 | 30 | N | Pass        |
| 612235 | F | Afar Regio HE Qualific  | 0 | 30 | N | Pass        |
| 612429 | F | Somalia Re Lower Tha    | 0 | 30 | Y | Pass        |
| 613027 | F | North Regi Lower Tha    | 0 | 30 | N | Pass        |
| 613059 | F | Amhara Re Lower Tha     | 1 | 30 | N | Pass        |
| 613728 | F | South Regi A Level or I | 0 | 30 | N | Fail        |
| 614798 | F | Afar Regio Lower Tha    | 0 | 30 | N | Pass        |
| 616704 | F | South Wes Lower Tha     | 0 | 30 | Y | Withdrawn   |
| 617962 | F | South Regi A Level or I | 0 | 30 | N | Distinction |
| 618253 | F | Addis Abak Lower Tha    | 0 | 30 | N | Fail        |
| 620239 | F | Amhara Re Lower Tha     | 1 | 30 | N | Pass        |
| 620826 | F | Addis Abak Lower Tha    | 0 | 30 | Y | Withdrawn   |
| 621485 | F | South Regi A Level or I | 0 | 30 | N | Pass        |
| 622118 | F | South Wes Lower Tha     | 1 | 30 | N | Fail        |
| 623178 | F | Oromia Re A Level or I  | 0 | 30 | N | Distinction |
| 623475 | F | Addis Abak Lower Tha    | 0 | 30 | Y | Pass        |
| 623588 | F | Addis Abak A Level or I | 0 | 30 | Y | Pass        |
| 623812 | F | Sidamo Re A Level or I  | 0 | 30 | N | Distinction |
| 624563 | F | Amhara Re A Level or I  | 0 | 30 | N | Pass        |
| 624767 | F | Sidamo Re A Level or I  | 1 | 30 | N | Distinction |
| 625241 | F | South Wes Lower Tha     | 0 | 30 | N | Pass        |
| 625411 | M | Afar Regio Lower Tha    | 0 | 90 | N | Pass        |
| 625530 | F | Somalia Re Lower Tha    | 0 | 30 | Y | Pass        |
| 625835 | M | Somalia Re Lower Tha    | 0 | 30 | N | Withdrawn   |
| 626005 | F | South Regi A Level or I | 0 | 30 | N | Fail        |
| 626384 | F | Addis Abak Lower Tha    | 0 | 30 | N | Distinction |
| 627481 | F | Sidamo Re Lower Tha     | 0 | 30 | N | Pass        |
| 627809 | F | Addis Abak Lower Tha    | 1 | 30 | N | Fail        |
| 627812 | F | Sidamo Re Lower Tha     | 1 | 30 | N | Distinction |
| 628172 | F | Somalia Re Lower Tha    | 1 | 30 | N | Fail        |
| 628299 | F | South Regi Lower Tha    | 1 | 30 | N | Distinction |

|        |   |                         |   |    |   |             |
|--------|---|-------------------------|---|----|---|-------------|
| 628569 | F | South Wes Lower Thar    | 0 | 30 | N | Fail        |
| 629258 | F | Sidamo Re, A Level or I | 1 | 90 | N | Fail        |
| 631446 | F | Addis Abak HE Qualific  | 1 | 30 | N | Pass        |
| 631723 | F | Addis Abak A Level or I | 0 | 30 | N | Pass        |
| 632161 | M | Sidamo Re, Lower Thar   | 0 | 30 | N | Pass        |
| 632266 | F | South Regi Lower Thar   | 0 | 30 | N | Pass        |
| 632365 | F | South Regi A Level or I | 0 | 30 | N | Distinction |
| 632368 | F | Sidamo Re, Lower Thar   | 0 | 30 | N | Fail        |
| 633060 | F | Addis Abak Lower Thar   | 0 | 30 | Y | Pass        |
| 633093 | F | Somalia Re A Level or I | 0 | 30 | N | Pass        |
| 633424 | F | South Regi A Level or I | 0 | 30 | Y | Pass        |
| 633561 | F | Sidamo Re, Lower Thar   | 1 | 30 | N | Pass        |
| 633818 | F | Afar Regio Lower Thar   | 0 | 30 | N | Pass        |
| 633987 | F | South Wes Lower Thar    | 0 | 30 | N | Pass        |
| 634019 | M | Amhara Re A Level or I  | 0 | 30 | N | Pass        |
| 634785 | F | Sidamo Re, Post Gradu   | 0 | 30 | N | Withdrawn   |
| 635279 | F | Somalia Re Lower Thar   | 0 | 30 | N | Distinction |
| 635334 | F | Addis Abak Lower Thar   | 0 | 30 | N | Distinction |
| 635703 | F | South Regi Lower Thar   | 0 | 30 | N | Pass        |
| 635719 | F | Addis Abak A Level or I | 0 | 30 | N | Pass        |
| 635779 | F | Addis Abak A Level or I | 0 | 30 | Y | Pass        |
| 635972 | F | South Regi A Level or I | 0 | 60 | N | Pass        |
| 635988 | M | South Regi Lower Thar   | 0 | 30 | N | Fail        |
| 636018 | F | Amhara Re Lower Thar    | 0 | 30 | N | Pass        |
| 636282 | F | Oromia Re Lower Thar    | 0 | 30 | Y | Distinction |
| 636283 | F | Sidamo Re, A Level or I | 0 | 30 | N | Pass        |
| 636323 | F | South Wes A Level or I  | 0 | 30 | N | Withdrawn   |
| 636458 | M | Addis Abak Lower Thar   | 0 | 30 | N | Fail        |
| 636464 | F | Amhara Re A Level or I  | 0 | 30 | N | Fail        |
| 636554 | F | South Regi A Level or I | 0 | 30 | N | Pass        |
| 636718 | F | Somalia Re Lower Thar   | 0 | 30 | N | Withdrawn   |
| 637067 | F | Oromia Re Lower Thar    | 0 | 30 | Y | Pass        |
| 637203 | F | South Regi Lower Thar   | 0 | 30 | N | Distinction |
| 637206 | F | Oromia Re A Level or I  | 0 | 30 | N | Distinction |
| 637246 | F | South Regi Lower Thar   | 0 | 60 | N | Withdrawn   |
| 637280 | M | South Regi Lower Thar   | 0 | 30 | N | Pass        |
| 637468 | F | South Wes Lower Thar    | 0 | 30 | N | Pass        |
| 637476 | F | Addis Abak A Level or I | 0 | 30 | N | Fail        |
| 637496 | F | South Regi Lower Thar   | 0 | 30 | N | Pass        |
| 637621 | F | North Regi A Level or I | 0 | 30 | N | Pass        |
| 637722 | F | South Regi A Level or I | 0 | 30 | N | Distinction |
| 637993 | F | South Regi Lower Thar   | 0 | 30 | N | Fail        |
| 638007 | F | Addis Abak Lower Thar   | 0 | 30 | N | Pass        |
| 638092 | F | South Wes A Level or I  | 0 | 60 | N | Withdrawn   |
| 638228 | F | Somalia Re Lower Thar   | 0 | 30 | N | Distinction |
| 638503 | M | South Regi No Formal    | 0 | 30 | N | Fail        |
| 638561 | F | South Wes Lower Thar    | 0 | 30 | N | Withdrawn   |

|        |   |                         |   |    |   |             |
|--------|---|-------------------------|---|----|---|-------------|
| 638621 | F | Amhara Re A Level or I  | 0 | 30 | N | Withdrawn   |
| 638699 | F | South Regi A Level or I | 0 | 30 | N | Pass        |
| 639181 | F | Sidamo Re A Level or I  | 0 | 30 | N | Distinction |
| 639251 | M | Amhara Re Lower Thar    | 0 | 30 | N | Pass        |
| 639461 | F | South Regi Lower Thar   | 0 | 30 | N | Fail        |
| 639533 | M | Addis Abak Lower Thar   | 0 | 30 | N | Withdrawn   |
| 639995 | F | South Wes Lower Thar    | 0 | 30 | N | Withdrawn   |
| 640505 | F | Afar Regio HE Qualific  | 0 | 30 | N | Distinction |
| 640654 | M | Afar Regio A Level or I | 0 | 30 | Y | Fail        |
| 640835 | F | Sidamo Re Lower Thar    | 0 | 30 | N | Withdrawn   |
| 640995 | F | Addis Abak A Level or I | 0 | 30 | N | Pass        |
| 641073 | F | Sidamo Re Lower Thar    | 0 | 30 | N | Withdrawn   |
| 641112 | F | South Regi A Level or I | 0 | 30 | Y | Pass        |
| 641134 | F | Somalia Re Lower Thar   | 0 | 30 | N | Withdrawn   |
| 641434 | F | Addis Abak Lower Thar   | 0 | 30 | N | Pass        |
| 641452 | F | South Regi Lower Thar   | 0 | 30 | N | Fail        |
| 641504 | F | Addis Abak Lower Thar   | 0 | 30 | Y | Withdrawn   |
| 641535 | F | Sidamo Re Lower Thar    | 0 | 30 | N | Fail        |
| 641766 | F | South Wes Lower Thar    | 0 | 30 | N | Fail        |
| 641940 | F | Sidamo Re Lower Thar    | 0 | 30 | N | Withdrawn   |
| 642181 | M | Sidamo Re Lower Thar    | 0 | 30 | N | Pass        |
| 642196 | F | Amhara Re A Level or I  | 0 | 30 | N | Fail        |
| 642528 | M | South Regi A Level or I | 0 | 40 | Y | Pass        |
| 642561 | F | Somalia Re Lower Thar   | 0 | 30 | N | Pass        |
| 642590 | F | Sidamo Re Lower Thar    | 0 | 30 | N | Fail        |
| 642694 | F | Addis Abak Lower Thar   | 0 | 30 | N | Pass        |
| 642821 | M | Amhara Re Lower Thar    | 0 | 30 | N | Fail        |
| 642851 | M | North Regi Lower Thar   | 0 | 30 | N | Pass        |
| 642879 | F | Sidamo Re Lower Thar    | 0 | 30 | Y | Fail        |
| 642883 | M | Sidamo Re A Level or I  | 0 | 30 | N | Pass        |
| 642900 | F | Addis Abak Lower Thar   | 0 | 30 | N | Distinction |
| 642905 | F | Amhara Re Lower Thar    | 0 | 30 | N | Pass        |
| 642949 | M | Sidamo Re Lower Thar    | 0 | 30 | N | Pass        |
| 642953 | F | Somalia Re Lower Thar   | 0 | 30 | N | Pass        |
| 642968 | F | Afar Regio Lower Thar   | 0 | 30 | N | Pass        |
| 642989 | F | Addis Abak Lower Thar   | 0 | 30 | N | Pass        |
| 643085 | F | Addis Abak Lower Thar   | 0 | 30 | N | Withdrawn   |
| 643191 | F | South Wes Lower Thar    | 0 | 30 | Y | Withdrawn   |
| 643206 | F | South Wes A Level or I  | 0 | 30 | N | Pass        |
| 643323 | F | South Regi A Level or I | 0 | 30 | N | Pass        |
| 643406 | F | Sidamo Re A Level or I  | 0 | 30 | N | Pass        |
| 643525 | M | Amhara Re A Level or I  | 0 | 30 | Y | Withdrawn   |
| 643529 | M | Amhara Re Lower Thar    | 0 | 30 | Y | Fail        |
| 643619 | F | Amhara Re Lower Thar    | 0 | 30 | Y | Pass        |
| 643659 | F | Tigrai Regi Lower Thar  | 0 | 30 | Y | Fail        |
| 643672 | F | Sidamo Re A Level or I  | 0 | 30 | N | Pass        |
| 643712 | F | Sidamo Re A Level or I  | 0 | 30 | N | Withdrawn   |

|        |   |             |             |   |    |   |             |
|--------|---|-------------|-------------|---|----|---|-------------|
| 643970 | F | Tigrai Regi | Lower Tha   | 0 | 30 | Y | Pass        |
| 644061 | F | South Regi  | No Formal   | 0 | 30 | N | Pass        |
| 644105 | M | South Regi  | Lower Tha   | 0 | 30 | N | Fail        |
| 644144 | F | Tigrai Regi | Lower Tha   | 0 | 30 | N | Distinction |
| 644160 | M | Addis Abat  | Lower Tha   | 0 | 30 | N | Pass        |
| 644188 | F | Sidamo Re   | Lower Tha   | 0 | 30 | N | Pass        |
| 644191 | M | Afar Regio  | Lower Tha   | 0 | 30 | N | Withdrawn   |
| 644226 | M | South Wes   | Lower Tha   | 0 | 30 | N | Distinction |
| 644252 | F | Addis Abat  | Lower Tha   | 0 | 30 | N | Fail        |
| 644301 | F | Sidamo Re   | Lower Tha   | 0 | 30 | N | Distinction |
| 644384 | F | Sidamo Re   | No Formal   | 0 | 30 | N | Pass        |
| 644441 | F | Sidamo Re   | Lower Tha   | 0 | 30 | N | Pass        |
| 644470 | F | Addis Abat  | Lower Tha   | 0 | 30 | N | Pass        |
| 644743 | F | Afar Regio  | Lower Tha   | 0 | 30 | N | Pass        |
| 644904 | F | Amhara Re   | A Level or  | 0 | 30 | N | Pass        |
| 644990 | M | South Regi  | Lower Tha   | 0 | 30 | N | Fail        |
| 645157 | F | South Regi  | A Level or  | 0 | 30 | N | Pass        |
| 645231 | F | Somalia Re  | Lower Tha   | 0 | 60 | N | Pass        |
| 645232 | M | Addis Abat  | Lower Tha   | 0 | 30 | Y | Distinction |
| 645326 | F | Tigrai Regi | A Level or  | 0 | 30 | N | Pass        |
| 645377 | F | Afar Regio  | Lower Tha   | 0 | 30 | N | Distinction |
| 645598 | F | South Wes   | A Level or  | 0 | 30 | N | Fail        |
| 645607 | M | Sidamo Re   | Lower Tha   | 0 | 30 | N | Pass        |
| 645730 | F | Addis Abat  | Lower Tha   | 0 | 30 | N | Pass        |
| 645801 | M | Sidamo Re   | Lower Tha   | 0 | 30 | N | Pass        |
| 645851 | M | Sidamo Re   | A Level or  | 0 | 30 | N | Withdrawn   |
| 645876 | M | Addis Abat  | Lower Tha   | 0 | 30 | N | Distinction |
| 645928 | F | Sidamo Re   | Lower Tha   | 0 | 30 | N | Pass        |
| 645969 | F | South Wes   | A Level or  | 0 | 30 | N | Pass        |
| 646131 | F | Somalia Re  | A Level or  | 0 | 30 | N | Pass        |
| 646152 | F | Sidamo Re   | Lower Tha   | 0 | 30 | N | Fail        |
| 646169 | F | Somalia Re  | Lower Tha   | 0 | 30 | N | Distinction |
| 646342 | M | Amhara Re   | Lower Tha   | 0 | 30 | N | Pass        |
| 646367 | F | South Regi  | Lower Tha   | 0 | 30 | N | Pass        |
| 646401 | F | Sidamo Re   | A Level or  | 0 | 30 | N | Withdrawn   |
| 646430 | F | Oromia Re   | A Level or  | 0 | 30 | N | Distinction |
| 646432 | F | Oromia Re   | HE Qualific | 0 | 30 | N | Fail        |
| 646470 | F | Amhara Re   | A Level or  | 0 | 30 | N | Withdrawn   |
| 646508 | M | Sidamo Re   | Lower Tha   | 0 | 30 | N | Distinction |
| 646572 | F | Sidamo Re   | Lower Tha   | 0 | 30 | N | Pass        |
| 646576 | F | Somalia Re  | Lower Tha   | 0 | 30 | N | Pass        |
| 646685 | F | Sidamo Re   | Lower Tha   | 0 | 30 | N | Pass        |
| 646729 | F | Tigrai Regi | A Level or  | 0 | 30 | N | Pass        |
| 646748 | F | Oromia Re   | A Level or  | 0 | 30 | Y | Withdrawn   |
| 646801 | F | South Regi  | Lower Tha   | 0 | 30 | N | Fail        |
| 646821 | M | Afar Regio  | A Level or  | 0 | 30 | N | Fail        |
| 646857 | F | South Regi  | Lower Tha   | 0 | 30 | N | Distinction |

|        |   |                         |   |    |   |             |
|--------|---|-------------------------|---|----|---|-------------|
| 646881 | F | Afar Region HE Qualific | 0 | 30 | Y | Fail        |
| 646889 | F | Sidamo Re Lower Than    | 0 | 30 | N | Withdrawn   |
| 646891 | F | South Regi Lower Than   | 0 | 60 | N | Withdrawn   |
| 646905 | F | Oromia Re A Level or I  | 0 | 30 | N | Pass        |
| 646953 | F | Somalia Re Lower Than   | 0 | 90 | N | Pass        |
| 647054 | F | South Regi A Level or I | 0 | 30 | N | Pass        |
| 647067 | F | Amhara Re Lower Than    | 0 | 30 | N | Fail        |
| 647102 | F | Sidamo Re A Level or I  | 0 | 30 | N | Distinction |
| 647345 | F | South Regi Lower Than   | 0 | 30 | Y | Fail        |
| 647442 | F | Sidamo Re A Level or I  | 0 | 30 | N | Withdrawn   |
| 647654 | M | Sidamo Re A Level or I  | 0 | 30 | N | Fail        |
| 647758 | F | Addis Abat Lower Than   | 0 | 30 | Y | Withdrawn   |
| 647761 | F | Oromia Re A Level or I  | 0 | 30 | N | Pass        |
| 647850 | F | Sidamo Re Lower Than    | 0 | 30 | N | Pass        |
| 647893 | F | South Regi Lower Than   | 0 | 30 | N | Pass        |
| 647986 | F | Somalia Re Lower Than   | 0 | 30 | N | Pass        |
| 648023 | F | South Wes A Level or I  | 0 | 90 | N | Fail        |
| 648049 | M | Oromia Re HE Qualific   | 0 | 30 | N | Pass        |
| 648083 | F | South Regi Lower Than   | 0 | 30 | N | Distinction |
| 648100 | F | North Regi Lower Than   | 0 | 60 | N | Pass        |
| 648110 | F | Sidamo Re Lower Than    | 0 | 60 | N | Withdrawn   |
| 648115 | M | Somalia Re A Level or I | 0 | 60 | N | Withdrawn   |
| 648117 | M | Oromia Re Lower Than    | 0 | 30 | N | Pass        |
| 648158 | F | South Regi Lower Than   | 0 | 30 | N | Withdrawn   |
| 648178 | F | Amhara Re Lower Than    | 0 | 30 | N | Pass        |
| 648207 | F | Amhara Re Lower Than    | 0 | 30 | N | Pass        |
| 648257 | M | Amhara Re Lower Than    | 0 | 30 | N | Withdrawn   |
| 648274 | M | Sidamo Re A Level or I  | 0 | 30 | N | Distinction |
| 648279 | F | South Regi A Level or I | 0 | 30 | N | Pass        |
| 648380 | M | Somalia Re Lower Than   | 0 | 30 | Y | Pass        |
| 648445 | F | Addis Abat A Level or I | 0 | 30 | N | Fail        |
| 648498 | F | Addis Abat Lower Than   | 0 | 30 | N | Distinction |
| 648522 | F | South Regi Lower Than   | 0 | 30 | N | Pass        |
| 648528 | M | Amhara Re A Level or I  | 0 | 90 | Y | Pass        |
| 648750 | F | Sidamo Re A Level or I  | 0 | 30 | N | Pass        |
| 648983 | F | South Regi A Level or I | 0 | 30 | N | Distinction |
| 649095 | F | Sidamo Re A Level or I  | 0 | 30 | N | Pass        |
| 649113 | F | Somalia Re A Level or I | 0 | 30 | N | Withdrawn   |
| 649153 | F | Afar Region Lower Than  | 0 | 30 | N | Withdrawn   |
| 649194 | M | South Regi A Level or I | 0 | 30 | N | Distinction |
| 649206 | M | Somalia Re Lower Than   | 0 | 30 | N | Distinction |
| 649300 | F | South Wes Lower Than    | 0 | 30 | N | Withdrawn   |
| 649867 | F | Amhara Re A Level or I  | 0 | 30 | Y | Pass        |
| 649909 | F | Afar Region Lower Than  | 0 | 30 | Y | Pass        |
| 650023 | F | Amhara Re Lower Than    | 0 | 30 | Y | Fail        |
| 650257 | F | Oromia Re Lower Than    | 0 | 90 | Y | Withdrawn   |
| 650263 | F | Somalia Re A Level or I | 0 | 30 | N | Fail        |

|        |   |                         |   |    |   |             |
|--------|---|-------------------------|---|----|---|-------------|
| 650268 | F | Oromia Re A Level or I  | 0 | 30 | N | Distinction |
| 650316 | M | Sidamo Re Lower Tha     | 0 | 30 | N | Fail        |
| 650388 | F | Addis Abak Lower Tha    | 0 | 30 | N | Fail        |
| 650503 | F | South Wes Lower Tha     | 0 | 30 | N | Pass        |
| 650630 | M | South Regi Lower Tha    | 0 | 30 | N | Fail        |
| 650652 | F | Somalia Re Lower Tha    | 0 | 30 | N | Pass        |
| 650656 | F | Addis Abak Lower Tha    | 0 | 30 | N | Withdrawn   |
| 650662 | M | South Regi Lower Tha    | 0 | 30 | Y | Withdrawn   |
| 650698 | F | South Wes Lower Tha     | 0 | 30 | N | Pass        |
| 650751 | F | Somalia Re Lower Tha    | 0 | 30 | N | Distinction |
| 650901 | F | Oromia Re Lower Tha     | 0 | 30 | N | Distinction |
| 651210 | F | Sidamo Re Lower Tha     | 0 | 30 | Y | Withdrawn   |
| 651259 | F | South Regi A Level or I | 0 | 30 | N | Withdrawn   |
| 651281 | M | South Regi Lower Tha    | 0 | 30 | N | Fail        |
| 651319 | M | Tigrai Regi Lower Tha   | 0 | 30 | N | Pass        |
| 651436 | F | South Regi Lower Tha    | 0 | 30 | N | Pass        |
| 651602 | M | Somalia Re A Level or I | 0 | 30 | N | Withdrawn   |
| 651624 | F | Amhara Re Lower Tha     | 0 | 30 | N | Pass        |
| 651628 | F | South Regi Lower Tha    | 0 | 30 | Y | Pass        |
| 651660 | F | Addis Abak Lower Tha    | 0 | 30 | N | Distinction |
| 651730 | F | Oromia Re Lower Tha     | 0 | 30 | N | Withdrawn   |
| 651740 | F | Addis Abak A Level or I | 0 | 30 | Y | Distinction |
| 651748 | F | Sidamo Re A Level or I  | 0 | 60 | Y | Withdrawn   |
| 651943 | F | Sidamo Re Lower Tha     | 0 | 30 | N | Distinction |
| 651954 | F | Addis Abak Lower Tha    | 0 | 90 | Y | Fail        |
| 652112 | M | Addis Abak A Level or I | 0 | 30 | N | Fail        |
| 652281 | F | South Wes Lower Tha     | 0 | 30 | N | Pass        |
| 652364 | F | South Regi A Level or I | 0 | 30 | N | Withdrawn   |
| 652414 | F | Sidamo Re Lower Tha     | 0 | 30 | Y | Pass        |
| 652435 | M | Somalia Re A Level or I | 0 | 30 | N | Distinction |
| 652462 | M | South Regi Lower Tha    | 0 | 30 | N | Pass        |
| 652539 | F | South Regi A Level or I | 0 | 30 | N | Pass        |
| 652574 | F | Amhara Re Lower Tha     | 0 | 30 | Y | Fail        |
| 652578 | F | Sidamo Re A Level or I  | 0 | 30 | N | Fail        |
| 652968 | F | Sidamo Re Lower Tha     | 0 | 30 | N | Fail        |
| 653157 | F | South Regi Lower Tha    | 0 | 30 | N | Pass        |
| 653230 | F | Addis Abak A Level or I | 0 | 30 | Y | Withdrawn   |
| 653249 | M | Sidamo Re Lower Tha     | 0 | 60 | Y | Withdrawn   |
| 653252 | F | Addis Abak No Formal    | 0 | 30 | Y | Pass        |
| 653292 | M | Addis Abak Lower Tha    | 0 | 30 | N | Withdrawn   |
| 653374 | F | Sidamo Re Lower Tha     | 0 | 30 | N | Distinction |
| 653435 | F | Sidamo Re Lower Tha     | 0 | 30 | Y | Pass        |
| 653495 | F | Sidamo Re Lower Tha     | 0 | 30 | N | Pass        |
| 653561 | F | South Regi Lower Tha    | 0 | 90 | N | Withdrawn   |
| 653601 | F | South Regi Lower Tha    | 0 | 30 | N | Fail        |
| 653806 | F | Sidamo Re Lower Tha     | 0 | 30 | N | Fail        |
| 653824 | F | Addis Abak Lower Tha    | 0 | 30 | N | Pass        |

|        |   |                          |   |    |   |             |
|--------|---|--------------------------|---|----|---|-------------|
| 653867 | F | Oromia Re A Level or I   | 0 | 30 | N | Pass        |
| 653943 | F | South Regi A Level or I  | 0 | 30 | N | Distinction |
| 654062 | F | Amhara Re Lower Than     | 0 | 30 | N | Pass        |
| 654064 | F | Afar Region A Level or I | 0 | 30 | N | Pass        |
| 654237 | F | South Regi Lower Than    | 0 | 30 | N | Fail        |
| 654321 | F | Somalia Re Lower Than    | 0 | 30 | N | Fail        |
| 654369 | M | South Wes Lower Than     | 0 | 30 | N | Pass        |
| 654681 | F | Addis Abak Lower Than    | 0 | 30 | N | Distinction |
| 654821 | F | South Regi A Level or I  | 0 | 30 | N | Fail        |
| 654914 | F | Addis Abak Lower Than    | 0 | 30 | N | Pass        |
| 654916 | F | Tigrai Regi No Formal    | 0 | 30 | N | Fail        |
| 654945 | M | Oromia Re Lower Than     | 0 | 30 | N | Distinction |
| 654965 | F | Oromia Re A Level or I   | 0 | 30 | N | Pass        |
| 655065 | F | Amhara Re A Level or I   | 0 | 30 | N | Fail        |
| 655201 | F | Sidamo Re Lower Than     | 0 | 30 | N | Fail        |
| 655376 | F | Sidamo Re Lower Than     | 0 | 30 | N | Pass        |
| 655556 | F | South Wes A Level or I   | 0 | 30 | N | Fail        |
| 655625 | F | South Regi A Level or I  | 0 | 30 | N | Fail        |
| 655954 | M | Sidamo Re A Level or I   | 0 | 30 | Y | Distinction |
| 656014 | M | Somalia Re A Level or I  | 0 | 30 | N | Fail        |
| 656053 | F | South Wes A Level or I   | 0 | 30 | N | Pass        |
| 656111 | F | South Wes Lower Than     | 0 | 30 | Y | Fail        |
| 656438 | F | North Regi A Level or I  | 0 | 30 | N | Fail        |
| 656506 | M | South Regi Lower Than    | 0 | 30 | N | Distinction |
| 656543 | F | Somalia Re A Level or I  | 0 | 30 | N | Distinction |
| 656637 | F | Oromia Re Lower Than     | 0 | 30 | N | Fail        |
| 656756 | F | Amhara Re Lower Than     | 0 | 30 | N | Pass        |
| 656936 | F | Afar Region A Level or I | 0 | 30 | N | Pass        |
| 656970 | F | South Regi A Level or I  | 0 | 30 | Y | Withdrawn   |
| 657045 | F | Afar Region Lower Than   | 0 | 30 | N | Pass        |
| 657093 | M | Sidamo Re No Formal      | 0 | 60 | N | Withdrawn   |
| 657231 | M | South Regi A Level or I  | 0 | 30 | N | Pass        |
| 657327 | M | South Wes Lower Than     | 0 | 30 | N | Withdrawn   |
| 657351 | F | Addis Abak Lower Than    | 0 | 30 | N | Withdrawn   |
| 674340 | M | Sidamo Re HE Qualific    | 0 | 30 | N | Fail        |
| 674359 | F | South Wes A Level or I   | 0 | 30 | N | Fail        |
| 674467 | M | South Regi A Level or I  | 0 | 30 | Y | Withdrawn   |
| 674471 | F | South Regi Lower Than    | 0 | 30 | N | Withdrawn   |
| 674481 | M | Sidamo Re Lower Than     | 0 | 30 | N | Fail        |
| 674563 | F | Tigrai Regi Lower Than   | 0 | 30 | N | Pass        |
| 674568 | F | Addis Abak A Level or I  | 0 | 30 | Y | Pass        |
| 674640 | F | South Regi Lower Than    | 0 | 30 | Y | Pass        |
| 674660 | F | Sidamo Re A Level or I   | 0 | 60 | N | Fail        |
| 674710 | M | North Regi A Level or I  | 0 | 30 | N | Fail        |
| 674750 | F | North Regi Lower Than    | 0 | 60 | N | Withdrawn   |
| 674766 | F | Addis Abak Lower Than    | 0 | 30 | N | Fail        |
| 674890 | M | Amhara Re Lower Than     | 0 | 30 | Y | Distinction |

|        |   |                          |   |    |   |             |
|--------|---|--------------------------|---|----|---|-------------|
| 674927 | F | South Regi Lower Tha     | 0 | 30 | N | Pass        |
| 674939 | F | South Regi A Level or I  | 0 | 30 | N | Fail        |
| 674983 | F | Afar Regio Lower Tha     | 0 | 30 | N | Withdrawn   |
| 675242 | F | Sidamo Re Lower Tha      | 0 | 30 | N | Pass        |
| 675247 | M | Somalia Re A Level or I  | 0 | 30 | N | Distinction |
| 675264 | M | North Regi A Level or I  | 0 | 30 | N | Pass        |
| 675578 | F | Addis Abak Lower Tha     | 0 | 30 | N | Pass        |
| 675629 | F | Addis Abak Lower Tha     | 0 | 30 | N | Fail        |
| 675811 | F | Addis Abak Lower Tha     | 0 | 30 | N | Distinction |
| 675848 | F | Oromia Re A Level or I   | 0 | 30 | N | Distinction |
| 675879 | F | Tigrai Regi No Formal    | 0 | 30 | N | Withdrawn   |
| 675880 | F | Tigrai Regi Lower Tha    | 0 | 30 | N | Fail        |
| 675885 | F | Tigrai Regi Lower Tha    | 0 | 30 | N | Withdrawn   |
| 675888 | F | Tigrai Regi A Level or I | 0 | 30 | N | Fail        |
| 675891 | F | Afar Regio Lower Tha     | 0 | 30 | N | Distinction |
| 675924 | F | South Regi A Level or I  | 0 | 30 | N | Distinction |
| 675949 | F | Afar Regio Lower Tha     | 0 | 30 | N | Distinction |
| 675996 | F | Oromia Re A Level or I   | 0 | 30 | N | Withdrawn   |
| 676034 | F | South Wes Lower Tha      | 0 | 30 | N | Distinction |
| 676071 | M | South Regi Lower Tha     | 0 | 90 | N | Pass        |
| 676387 | F | Tigrai Regi Lower Tha    | 0 | 30 | N | Pass        |
| 676690 | F | South Regi Lower Tha     | 0 | 30 | Y | Withdrawn   |
| 676739 | F | Oromia Re A Level or I   | 0 | 30 | N | Fail        |
| 676742 | F | Sidamo Re No Formal      | 0 | 60 | N | Withdrawn   |
| 677022 | F | Sidamo Re A Level or I   | 0 | 30 | N | Withdrawn   |
| 677025 | F | South Regi Lower Tha     | 0 | 30 | N | Distinction |
| 677066 | F | Oromia Re Lower Tha      | 0 | 30 | Y | Pass        |
| 677150 | M | Addis Abak HE Qualific   | 0 | 30 | N | Fail        |
| 677184 | F | Tigrai Regi Lower Tha    | 0 | 60 | N | Withdrawn   |
| 677216 | M | Addis Abak Lower Tha     | 0 | 30 | N | Distinction |
| 677278 | F | Sidamo Re Lower Tha      | 0 | 30 | N | Fail        |
| 677356 | M | Sidamo Re Lower Tha      | 0 | 30 | N | Pass        |
| 677433 | F | Somalia Re Lower Tha     | 0 | 30 | Y | Fail        |
| 677463 | F | Sidamo Re A Level or I   | 0 | 30 | N | Distinction |
| 677491 | M | Sidamo Re Lower Tha      | 0 | 30 | N | Distinction |
| 677551 | F | South Regi Lower Tha     | 0 | 30 | N | Withdrawn   |
| 677928 | F | Addis Abak A Level or I  | 0 | 30 | N | Pass        |
| 677963 | M | Amhara Re Lower Tha      | 0 | 30 | N | Withdrawn   |
| 678004 | F | Afar Regio A Level or I  | 0 | 30 | N | Pass        |
| 678009 | F | North Regi Lower Tha     | 0 | 90 | N | Distinction |
| 678241 | F | South Wes A Level or I   | 0 | 30 | N | Withdrawn   |
| 678255 | F | Afar Regio Lower Tha     | 0 | 30 | Y | Pass        |
| 678261 | M | North Regi A Level or I  | 0 | 30 | N | Pass        |
| 678313 | M | South Wes A Level or I   | 0 | 30 | N | Fail        |
| 678432 | F | Sidamo Re A Level or I   | 0 | 30 | N | Pass        |
| 678612 | F | Sidamo Re Lower Tha      | 0 | 30 | N | Fail        |
| 678618 | F | Oromia Re Lower Tha      | 0 | 30 | N | Pass        |



|        |   |                          |   |    |   |             |
|--------|---|--------------------------|---|----|---|-------------|
| 678714 | F | South Regi Lower Tha     | 0 | 30 | N | Withdrawn   |
| 678762 | F | Somalia Re Lower Tha     | 0 | 30 | N | Pass        |
| 678774 | M | Amhara Re No Formal      | 0 | 30 | N | Pass        |
| 679127 | M | Sidamo Re Lower Tha      | 0 | 30 | N | Distinction |
| 679258 | F | Amhara Re Lower Tha      | 0 | 30 | Y | Fail        |
| 679275 | F | Oromia Re A Level or I   | 0 | 30 | N | Withdrawn   |
| 679327 | F | South Regi Lower Tha     | 0 | 30 | N | Distinction |
| 679332 | F | Afar Regioi A Level or I | 0 | 30 | N | Fail        |
| 679373 | F | Somalia Re Lower Tha     | 0 | 30 | Y | Withdrawn   |
| 679405 | F | Addis Abak Lower Tha     | 0 | 30 | N | Withdrawn   |
| 679409 | F | Somalia Re A Level or I  | 0 | 30 | N | Pass        |
| 679769 | F | Sidamo Re Lower Tha      | 0 | 60 | N | Pass        |
| 679840 | F | Sidamo Re Lower Tha      | 0 | 30 | N | Pass        |
| 679921 | F | Tigrai Regi A Level or I | 0 | 30 | N | Pass        |
| 680063 | F | Addis Abak A Level or I  | 0 | 30 | N | Pass        |
| 680176 | F | South Wes A Level or I   | 0 | 30 | N | Pass        |
| 680261 | F | South Wes Lower Tha      | 0 | 30 | N | Fail        |
| 680340 | F | South Regi Lower Tha     | 0 | 30 | N | Fail        |
| 680345 | F | Tigrai Regi A Level or I | 0 | 30 | N | Fail        |
| 680354 | F | Amhara Re Lower Tha      | 0 | 30 | N | Fail        |
| 680427 | F | Oromia Re Lower Tha      | 0 | 30 | N | Pass        |
| 680484 | F | South Wes Lower Tha      | 0 | 30 | N | Fail        |
| 680569 | F | Afar Regioi A Level or I | 0 | 30 | N | Pass        |
| 680850 | M | Amhara Re Lower Tha      | 0 | 30 | Y | Fail        |
| 680966 | M | South Regi Lower Tha     | 0 | 30 | N | Pass        |
| 680988 | F | Oromia Re Lower Tha      | 0 | 30 | Y | Withdrawn   |
| 680992 | M | Sidamo Re Lower Tha      | 0 | 30 | N | Withdrawn   |
| 681065 | F | Addis Abak Lower Tha     | 0 | 30 | Y | Distinction |
| 681107 | F | South Wes Lower Tha      | 0 | 30 | Y | Pass        |
| 681154 | F | Tigrai Regi Lower Tha    | 0 | 30 | N | Pass        |
| 681168 | M | Tigrai Regi No Formal    | 0 | 30 | N | Withdrawn   |
| 681195 | M | Afar Regioi No Formal    | 0 | 30 | N | Withdrawn   |
| 681268 | F | Sidamo Re A Level or I   | 0 | 30 | N | Fail        |
| 681383 | F | Somalia Re Lower Tha     | 0 | 30 | N | Fail        |
| 681421 | F | Amhara Re A Level or I   | 0 | 30 | N | Pass        |
| 681447 | F | Amhara Re Lower Tha      | 0 | 30 | N | Pass        |
| 681532 | F | Somalia Re Lower Tha     | 0 | 90 | N | Fail        |
| 681696 | F | Somalia Re Lower Tha     | 0 | 30 | N | Pass        |
| 681751 | F | Afar Regioi Lower Tha    | 0 | 30 | Y | Fail        |
| 681791 | M | Addis Abak Lower Tha     | 0 | 30 | N | Withdrawn   |
| 681876 | F | South Wes A Level or I   | 0 | 30 | N | Pass        |
| 682001 | F | South Regi Lower Tha     | 0 | 30 | N | Pass        |
| 682100 | M | Tigrai Regi A Level or I | 0 | 30 | N | Pass        |
| 682123 | F | South Wes A Level or I   | 0 | 30 | N | Distinction |
| 682302 | M | Tigrai Regi Lower Tha    | 0 | 60 | N | Withdrawn   |
| 682307 | F | Afar Regioi Lower Tha    | 0 | 30 | N | Fail        |
| 682321 | F | Afar Regioi Lower Tha    | 0 | 30 | N | Pass        |

|        |   |                         |   |     |   |             |
|--------|---|-------------------------|---|-----|---|-------------|
| 682413 | F | South Regi A Level or I | 0 | 30  | Y | Pass        |
| 682440 | M | Afar Regio Lower Tha    | 0 | 30  | Y | Fail        |
| 682481 | F | Addis Abak Lower Tha    | 0 | 30  | N | Withdrawn   |
| 682543 | M | Amhara Re Lower Tha     | 0 | 30  | N | Pass        |
| 682625 | F | South Regi Lower Tha    | 0 | 30  | N | Pass        |
| 682891 | F | Addis Abak Lower Tha    | 0 | 30  | N | Withdrawn   |
| 683005 | M | South Wes Lower Tha     | 0 | 30  | N | Pass        |
| 683188 | F | Sidamo Re Lower Tha     | 0 | 30  | N | Fail        |
| 683256 | F | Addis Abak No Formal    | 0 | 30  | N | Pass        |
| 683299 | F | Afar Regio Lower Tha    | 0 | 30  | N | Withdrawn   |
| 683336 | F | Somalia Re A Level or I | 0 | 30  | N | Distinction |
| 683423 | M | Addis Abak Lower Tha    | 0 | 150 | N | Pass        |
| 683633 | F | Sidamo Re Lower Tha     | 0 | 30  | N | Pass        |
| 683696 | F | Sidamo Re HE Qualific   | 0 | 60  | N | Withdrawn   |
| 683841 | F | Addis Abak Lower Tha    | 0 | 30  | N | Fail        |
| 683974 | F | North Regi Lower Tha    | 0 | 30  | N | Distinction |
| 684116 | F | North Regi Lower Tha    | 0 | 30  | N | Pass        |
| 684146 | F | Sidamo Re Lower Tha     | 0 | 30  | N | Pass        |
| 684169 | F | South Wes HE Qualific   | 0 | 30  | N | Distinction |
| 684341 | F | South Wes Lower Tha     | 0 | 30  | N | Pass        |
| 684393 | F | South Regi HE Qualific  | 0 | 30  | N | Pass        |
| 684427 | F | Somalia Re Lower Tha    | 0 | 30  | Y | Fail        |
| 684456 | F | Amhara Re A Level or I  | 0 | 30  | Y | Pass        |
| 684733 | F | Tigrai Regi Lower Tha   | 0 | 30  | N | Withdrawn   |
| 684802 | F | South Wes A Level or I  | 0 | 30  | N | Distinction |
| 684811 | F | Afar Regio A Level or I | 0 | 30  | N | Distinction |
| 684903 | F | South Regi Lower Tha    | 0 | 30  | N | Fail        |
| 684987 | M | Afar Regio Lower Tha    | 0 | 30  | N | Withdrawn   |
| 684995 | M | South Regi A Level or I | 0 | 30  | Y | Fail        |
| 685028 | F | South Wes Lower Tha     | 0 | 30  | N | Withdrawn   |
| 685096 | F | Afar Regio Lower Tha    | 0 | 30  | N | Withdrawn   |
| 685272 | M | South Wes Lower Tha     | 0 | 30  | N | Fail        |
| 685282 | F | Sidamo Re Lower Tha     | 0 | 30  | N | Fail        |
| 685285 | F | Sidamo Re Lower Tha     | 0 | 30  | N | Pass        |
| 685338 | F | Sidamo Re A Level or I  | 0 | 30  | N | Distinction |
| 685436 | F | Tigrai Regi Lower Tha   | 0 | 30  | Y | Pass        |
| 685447 | F | Oromia Re Lower Tha     | 0 | 30  | N | Fail        |
| 685535 | F | Addis Abak A Level or I | 0 | 30  | N | Pass        |
| 685545 | F | Afar Regio Lower Tha    | 0 | 30  | N | Pass        |
| 685575 | F | Addis Abak Lower Tha    | 0 | 30  | N | Distinction |
| 685627 | F | Afar Regio HE Qualific  | 0 | 30  | N | Pass        |
| 685676 | F | Afar Regio A Level or I | 0 | 30  | N | Distinction |
| 685877 | M | Addis Abak Lower Tha    | 0 | 30  | Y | Withdrawn   |
| 685923 | F | Sidamo Re Lower Tha     | 0 | 30  | N | Withdrawn   |
| 686028 | M | Amhara Re Lower Tha     | 0 | 30  | N | Fail        |
| 686112 | F | Sidamo Re A Level or I  | 0 | 30  | N | Distinction |
| 686194 | M | Oromia Re A Level or I  | 0 | 30  | N | Pass        |

|        |   |                          |   |     |   |             |
|--------|---|--------------------------|---|-----|---|-------------|
| 686207 | F | Amhara Re Lower Tha      | 0 | 90  | N | Distinction |
| 686267 | F | South Wes A Level or I   | 0 | 30  | N | Pass        |
| 686309 | F | South Regi Lower Tha     | 0 | 90  | N | Fail        |
| 686373 | M | Tigrai Regi HE Qualific  | 0 | 30  | N | Fail        |
| 686598 | F | Addis Abak Lower Tha     | 0 | 30  | Y | Pass        |
| 686650 | F | South Regi Lower Tha     | 0 | 30  | Y | Fail        |
| 686668 | F | Sidamo Re A Level or I   | 0 | 30  | N | Fail        |
| 686898 | F | Addis Abak Lower Tha     | 0 | 120 | N | Withdrawn   |
| 686918 | F | South Wes Lower Tha      | 0 | 30  | N | Distinction |
| 686921 | F | Somalia Re Lower Tha     | 0 | 30  | N | Pass        |
| 687028 | F | Afar Regio A Level or I  | 0 | 30  | N | Fail        |
| 687082 | F | Amhara Re A Level or I   | 0 | 30  | N | Fail        |
| 687143 | F | South Regi A Level or I  | 0 | 30  | N | Withdrawn   |
| 687302 | M | Addis Abak Lower Tha     | 0 | 30  | N | Pass        |
| 687523 | F | Amhara Re Lower Tha      | 0 | 30  | N | Fail        |
| 687534 | F | Sidamo Re Lower Tha      | 0 | 30  | N | Withdrawn   |
| 687586 | M | Amhara Re Lower Tha      | 0 | 30  | N | Fail        |
| 687620 | F | Afar Regio Lower Tha     | 0 | 30  | N | Distinction |
| 687626 | F | Oromia Re Lower Tha      | 0 | 30  | N | Fail        |
| 687653 | F | Somalia Re Lower Tha     | 0 | 30  | Y | Pass        |
| 687722 | F | Amhara Re A Level or I   | 0 | 30  | N | Pass        |
| 687780 | F | Sidamo Re Lower Tha      | 0 | 30  | N | Pass        |
| 687821 | M | Sidamo Re Lower Tha      | 0 | 30  | N | Pass        |
| 688038 | F | Oromia Re Lower Tha      | 0 | 30  | N | Distinction |
| 688050 | F | Afar Regio Lower Tha     | 0 | 30  | N | Fail        |
| 688199 | F | South Regi Lower Tha     | 0 | 90  | N | Distinction |
| 688379 | F | Afar Regio Lower Tha     | 0 | 30  | N | Pass        |
| 688388 | F | Tigrai Regi A Level or I | 0 | 30  | N | Distinction |
| 688401 | F | Somalia Re A Level or I  | 0 | 30  | Y | Pass        |
| 688658 | F | South Wes Lower Tha      | 0 | 30  | N | Withdrawn   |
| 688663 | F | Tigrai Regi Lower Tha    | 0 | 30  | N | Withdrawn   |
| 688811 | F | Afar Regio A Level or I  | 0 | 30  | N | Pass        |
| 688819 | F | Sidamo Re A Level or I   | 0 | 30  | N | Distinction |
| 688822 | F | Sidamo Re Lower Tha      | 0 | 30  | N | Fail        |
| 688856 | F | Oromia Re Lower Tha      | 0 | 30  | N | Fail        |
| 689065 | F | Afar Regio HE Qualific   | 0 | 30  | N | Fail        |
| 689335 | F | North Regi Lower Tha     | 0 | 30  | N | Pass        |
| 689371 | F | Somalia Re Lower Tha     | 0 | 30  | N | Distinction |
| 689433 | F | Amhara Re Lower Tha      | 0 | 30  | N | Pass        |
| 689485 | F | South Regi Lower Tha     | 0 | 30  | Y | Fail        |
| 689503 | M | Somalia Re Lower Tha     | 0 | 30  | N | Pass        |
| 689554 | F | Somalia Re Lower Tha     | 0 | 30  | N | Withdrawn   |
| 689594 | F | Addis Abak Lower Tha     | 0 | 30  | N | Pass        |
| 689636 | F | Afar Regio Lower Tha     | 0 | 30  | N | Pass        |
| 689711 | F | Amhara Re Lower Tha      | 0 | 30  | N | Fail        |
| 689754 | M | Sidamo Re A Level or I   | 0 | 30  | N | Pass        |
| 689838 | F | Afar Regio Lower Tha     | 0 | 30  | Y | Fail        |

|        |   |                         |   |    |   |             |
|--------|---|-------------------------|---|----|---|-------------|
| 689839 | M | Sidamo Re, Lower Tha    | 0 | 30 | N | Fail        |
| 689878 | F | Sidamo Re, A Level or I | 0 | 30 | N | Pass        |
| 690029 | F | Amhara Re A Level or I  | 0 | 30 | Y | Pass        |
| 690038 | F | Sidamo Re, Lower Tha    | 0 | 30 | N | Fail        |
| 690044 | M | South Wes Lower Tha     | 0 | 30 | N | Pass        |
| 690057 | F | Tigrai Regio Lower Tha  | 0 | 30 | Y | Pass        |
| 690065 | F | Tigrai Regio Lower Tha  | 0 | 30 | Y | Fail        |
| 690471 | F | Sidamo Re, Lower Tha    | 0 | 30 | N | Fail        |
| 690556 | F | Oromia Re Lower Tha     | 0 | 30 | N | Fail        |
| 690579 | F | Somalia Re Lower Tha    | 0 | 30 | N | Pass        |
| 690895 | F | Afar Regio A Level or I | 0 | 30 | N | Withdrawn   |
| 691127 | F | Afar Regio HE Qualific  | 0 | 30 | Y | Pass        |
| 691229 | F | Afar Regio HE Qualific  | 0 | 30 | N | Pass        |
| 691281 | F | Sidamo Re, A Level or I | 0 | 30 | N | Fail        |
| 691371 | F | North Regi A Level or I | 0 | 30 | N | Pass        |
| 691501 | F | Afar Regio Lower Tha    | 0 | 30 | Y | Distinction |
| 691519 | F | Sidamo Re, Lower Tha    | 0 | 30 | N | Pass        |
| 691556 | F | Afar Regio Lower Tha    | 0 | 30 | N | Pass        |
| 691577 | M | Addis Abak Lower Tha    | 0 | 30 | Y | Withdrawn   |
| 691787 | F | Afar Regio Lower Tha    | 0 | 30 | Y | Fail        |
| 692018 | F | South Regi A Level or I | 0 | 30 | Y | Pass        |
| 692171 | F | Tigrai Regio Lower Tha  | 0 | 30 | N | Pass        |
| 692206 | F | Amhara Re A Level or I  | 0 | 30 | N | Fail        |
| 692256 | F | Tigrai Regio Lower Tha  | 0 | 30 | N | Distinction |
| 692320 | F | Amhara Re Lower Tha     | 0 | 30 | N | Fail        |
| 692828 | F | South Regi Lower Tha    | 0 | 30 | N | Pass        |
| 692972 | F | South Regi HE Qualific  | 0 | 30 | N | Distinction |
| 693046 | F | Amhara Re Lower Tha     | 0 | 30 | N | Fail        |
| 693053 | F | Sidamo Re, A Level or I | 0 | 30 | N | Distinction |
| 693273 | M | Sidamo Re, No Formal    | 0 | 30 | N | Fail        |
| 693364 | F | Afar Regio Lower Tha    | 0 | 30 | N | Pass        |
| 693387 | F | Afar Regio A Level or I | 0 | 30 | N | Pass        |
| 693421 | M | North Regi Lower Tha    | 0 | 30 | Y | Distinction |
| 693616 | F | Somalia Re Lower Tha    | 0 | 30 | N | Pass        |
| 693763 | F | Addis Abak Lower Tha    | 0 | 30 | Y | Pass        |
| 693788 | F | Afar Regio HE Qualific  | 0 | 30 | N | Distinction |
| 693843 | F | South Regi Lower Tha    | 0 | 30 | N | Pass        |
| 694009 | F | Amhara Re Lower Tha     | 0 | 30 | Y | Distinction |
| 694070 | F | South Wes Lower Tha     | 0 | 30 | N | Fail        |
| 694082 | F | Somalia Re A Level or I | 0 | 30 | N | Pass        |
| 694292 | M | Sidamo Re, Lower Tha    | 0 | 30 | N | Pass        |
| 694359 | F | Somalia Re Lower Tha    | 0 | 30 | N | Pass        |
| 694416 | M | Tigrai Regio Lower Tha  | 0 | 30 | Y | Withdrawn   |
| 694470 | F | Oromia Re Lower Tha     | 0 | 30 | Y | Pass        |
| 694723 | F | Sidamo Re, A Level or I | 0 | 30 | N | Distinction |
| 694729 | F | Oromia Re A Level or I  | 0 | 30 | N | Pass        |
| 694782 | F | Sidamo Re, Lower Tha    | 0 | 30 | N | Distinction |

|         |   |                           |   |    |   |             |
|---------|---|---------------------------|---|----|---|-------------|
| 695143  | F | South Wes Lower Thai      | 0 | 90 | Y | Withdrawn   |
| 695509  | M | Tigrai Regio HE Qualific  | 0 | 30 | N | Pass        |
| 695655  | M | South Regi A Level or I   | 0 | 30 | N | Pass        |
| 695877  | F | Afar Regio Lower Thai     | 0 | 30 | Y | Fail        |
| 695913  | F | South Regi Lower Thai     | 0 | 30 | N | Pass        |
| 695951  | F | Tigrai Regio Lower Thai   | 0 | 90 | Y | Pass        |
| 696157  | F | Tigrai Regio Lower Thai   | 0 | 30 | N | Pass        |
| 696514  | F | South Wes Lower Thai      | 0 | 30 | N | Distinction |
| 696706  | F | Tigrai Regio HE Qualific  | 0 | 30 | N | Pass        |
| 696708  | M | Tigrai Regio Lower Thai   | 0 | 30 | N | Fail        |
| 696710  | F | Tigrai Regio A Level or I | 0 | 30 | N | Fail        |
| 696711  | F | Tigrai Regio A Level or I | 0 | 30 | N | Fail        |
| 696712  | F | Tigrai Regio HE Qualific  | 0 | 30 | N | Pass        |
| 696713  | F | Tigrai Regio A Level or I | 0 | 30 | N | Pass        |
| 696876  | F | Tigrai Regio A Level or I | 0 | 30 | N | Pass        |
| 697314  | F | South Regi Lower Thai     | 0 | 30 | Y | Pass        |
| 697325  | F | Addis Abak Lower Thai     | 0 | 30 | Y | Distinction |
| 697328  | F | South Wes A Level or I    | 0 | 30 | N | Pass        |
| 697364  | F | South Wes Lower Thai      | 0 | 30 | N | Withdrawn   |
| 697456  | M | Amhara Re Lower Thai      | 0 | 30 | N | Fail        |
| 697492  | F | Somalia Re Lower Thai     | 0 | 30 | N | Distinction |
| 698019  | F | Tigrai Regio Lower Thai   | 0 | 30 | N | Fail        |
| 698065  | F | Oromia Re Lower Thai      | 0 | 60 | N | Withdrawn   |
| 698163  | F | Amhara Re A Level or I    | 0 | 30 | N | Distinction |
| 698460  | F | Somalia Re HE Qualific    | 0 | 30 | N | Pass        |
| 698548  | M | Oromia Re HE Qualific     | 0 | 30 | N | Distinction |
| 699461  | F | Sidamo Re Lower Thai      | 0 | 30 | N | Pass        |
| 699628  | F | Tigrai Regio A Level or I | 0 | 30 | N | Fail        |
| 1405453 | F | Sidamo Re A Level or I    | 0 | 30 | N | Distinction |
| 1420575 | M | Afar Regio Lower Thai     | 0 | 30 | N | Pass        |
| 1689081 | F | South Wes A Level or I    | 0 | 30 | N | Pass        |
| 1734156 | F | Afar Regio Lower Thai     | 0 | 30 | N | Pass        |
| 1777563 | F | Amhara Re Lower Thai      | 0 | 30 | N | Pass        |
| 1782236 | F | South Regi A Level or I   | 0 | 30 | Y | Pass        |
| 1827650 | F | Addis Abak A Level or I   | 0 | 30 | N | Distinction |
| 1841303 | F | Sidamo Re Lower Thai      | 0 | 30 | N | Withdrawn   |
| 1890660 | F | North Regi Lower Thai     | 0 | 30 | N | Fail        |
| 1915795 | F | North Regi A Level or I   | 0 | 30 | N | Pass        |
| 1917808 | F | South Regi A Level or I   | 0 | 30 | N | Withdrawn   |
| 1931810 | F | Sidamo Re Lower Thai      | 0 | 30 | N | Fail        |
| 1950911 | F | South Wes Lower Thai      | 0 | 30 | N | Pass        |
| 1977701 | F | South Regi Lower Thai     | 0 | 30 | N | Pass        |
| 2004143 | F | Addis Abak Lower Thai     | 0 | 30 | N | Pass        |
| 2052942 | F | Afar Regio Lower Thai     | 0 | 30 | N | Pass        |
| 2053521 | F | South Wes A Level or I    | 1 | 30 | Y | Pass        |
| 2203216 | F | Tigrai Regio A Level or I | 0 | 30 | N | Withdrawn   |
| 2214722 | F | Afar Regio A Level or I   | 0 | 30 | N | Withdrawn   |

|         |   |                          |   |    |   |             |
|---------|---|--------------------------|---|----|---|-------------|
| 2239862 | M | Amhara Re Lower Th       | 0 | 30 | N | Withdrawn   |
| 2268380 | F | Afar Region Lower Th     | 0 | 30 | N | Pass        |
| 2270562 | F | Oromia Re Lower Th       | 0 | 30 | N | Distinction |
| 2271766 | F | Sidamo Re A Level or I   | 0 | 30 | N | Pass        |
| 2282141 | M | Tigray Regi A Level or I | 0 | 60 | N | Withdrawn   |
| 2311714 | F | Sidamo Re Lower Th       | 0 | 30 | N | Pass        |
| 2338614 | F | Afar Region A Level or I | 0 | 30 | Y | Withdrawn   |
| 2342238 | M | South Wes HE Qualific    | 0 | 30 | N | Withdrawn   |
| 2357806 | F | South Wes Lower Th       | 0 | 30 | N | Withdrawn   |
| 2373245 | M | Somalia Re Lower Th      | 0 | 30 | N | Distinction |
| 2378591 | F | South Regi A Level or I  | 1 | 30 | N | Fail        |
| 2456431 | F | South Regi Lower Th      | 0 | 30 | Y | Fail        |
| 2475886 | F | Addis Abat Lower Th      | 0 | 90 | N | Fail        |
| 2508153 | F | Somalia Re Lower Th      | 0 | 30 | N | Pass        |
| 2533195 | F | Oromia Re Lower Th       | 0 | 30 | N | Pass        |
| 2606765 | F | Sidamo Re Lower Th       | 0 | 30 | N | Pass        |
| 2608143 | M | Somalia Re HE Qualific   | 0 | 30 | N | Withdrawn   |
| 2620947 | F | Afar Region A Level or I | 0 | 30 | Y | Distinction |
| 2640965 | F | Tigray Regi Lower Th     | 0 | 30 | N | Fail        |
| 2645731 | F | Addis Abat Lower Th      | 0 | 30 | N | Distinction |
| 2648187 | F | South Regi A Level or I  | 0 | 30 | Y | Pass        |
| 2679821 | F | Oromia Re Lower Th       | 0 | 30 | N | Withdrawn   |
| 2684003 | F | Sidamo Re HE Qualific    | 0 | 30 | N | Distinction |
